# Supplementary material for: Decoding protein phosphorylation during oocyte meiotic divisions using phosphoproteomics
Source: eLife. 2025 Jul 17;13:RP104255. doi: 10.7554/eLife.104255 (PMC12270485; doi:10.7554/eLife.104255)
Supplement: Supplementary file 1. [file elife-104255-supp1.xlsx]

## Sheet: Mass_Protein_Concentration
GeneID	GeneSymbol	Mean-Conc,nM	t1:Conc,nM	t2:Conc,nM	t3:Conc,nM	t4:Conc,nM	t5:Conc,nM	t6:Conc,nM	t7:Conc,nM	t8:Conc,nM	t9:Conc,nM
MT-ATP6	MT-ATP6	790.647	92.313	91.148	85.843	82.249	91.731	85.247	79.826	89.977	92.313
MT-CO2	MT-CO2	976.706	106.513	123.018	104.9	108.117	108.117	105.707	108.117	104.9	107.316
MT-ND1	MT-ND1	1318.54	150.194	138.222	148.04	133.79	148.04	139.323	138.222	162.93	159.776
MT-ND2	MT-ND2	7896.07	830.544	944.493	836.998	881.753	875.403	894.41	875.403	894.41	862.661
MT-ND4	MT-ND4	1469.88	164.781	157.617	168.328	162.404	163.594	162.404	165.966	158.818	165.966
MT-ND5	MT-ND5	19355.2	2074.23	2453.95	2138.9	2138.9	2106.64	2090.45	2122.79	2138.9	2090.45
MT-ND6	MT-ND6	7550.32	823.409	793.844	852.65	811.623	846.827	852.65	887.336	840.991	840.991
Xelaev18000027m	BCAP31	9148.87	957.056	1089.74	979.594	1046.17	994.521	1024.14	1009.37	1016.77	1031.5
Xelaev18000029m	PLXNB3	103.939	11.802	10.495	11.544	10.848	12.228	12.313	12.313	11.198	11.198
Xelaev18000032m	HSD17B10	6095.15	676.791	666.442	656.041	640.339	697.337	671.623	666.442	717.69	702.443
Xelaev18000039m	IGF2BP3	2230.74	267.463	231.856	254.14	240.526	254.14	245.667	252.455	242.245	242.245
Xelaev18000059m	TMEM82	239.432	26.365	23.199	28.464	26.854	26.691	27.501	28.623	24.881	26.854
Xelaev18000064m	CBL	79.96	8.557	7.875	9.164	8.434	9.044	9.758	9.284	8.68	9.164
Xelaev18000071m	PGM2L1	594.8	83.478	80.494	80.923	74.422	74.861	66.839	56.135	45.788	31.861
Xelaev18000085m	APOL2	4918.42	568.348	511.527	585.739	557.834	575.324	561.345	575.324	504.289	478.693
Xelaev18000090m	GKAP1	1948.55	244.071	206.593	221.856	203.493	224.863	220.347	220.347	201.936	205.045
Xelaev18000104m	VNN1	599.636	65.794	66.739	66.739	64.844	67.21	63.888	65.794	69.081	69.546
Xelaev18000105m	VNN1	223.589	25.369	23.411	23.576	26.49	24.884	24.559	24.884	24.884	25.53
Xelaev18000122m	SMARCA5	279.446	29.663	32.111	30.785	31.007	32.111	32.111	32.331	29.889	29.437
Xelaev18000129m	TAF10	365.654	40.881	36.988	41.701	40.057	41.973	41.155	42.785	40.332	39.781
Xelaev18000134m	PPP1R3B	54.174	5.302	5.796	5.344	5.918	6.199	6.865	5.918	6.397	6.436
Xelaev18000136m	ERI1	481.911	49.376	46.949	49.776	50.969	51.758	54.871	57.163	58.671	62.38
Xelaev18000138m	UBAP2	896.91	99.295	94.247	99.295	90.579	103.547	102.843	103.547	100.009	103.547
Xelaev18000142m	NOL6	188.452	20.502	18.105	21.516	20.209	22.37	22.229	21.659	20.061	21.802
Xelaev18000191m	TMED10	860.501	91.844	93.627	93.627	93.627	95.394	97.726	90.044	100.605	104.008
Xelaev18000195m	PGGHG	1578.85	167.748	155.648	176.964	167.748	175.657	180.866	183.452	186.026	184.74
Xelaev18000200m	GAPDH	1713.76	233.285	169.402	185.677	202.807	200.202	189.673	184.338	177.599	170.777
Xelaev18000219m	CCAR1	106.315	12.47	11.099	12.722	11.186	12.47	12.132	12.301	10.924	11.011
Xelaev18000221m	DDX21	261.257	34.695	32.259	35.248	32.449	33.579	29.556	25.105	19.877	18.49
Xelaev18000278m	ZMYM1	15.356	1.698	1.55	1.732	1.63	1.698	1.72	1.72	1.832	1.776
Xelaev18000280m	DAD1	2405.29	267.39	236.631	287.932	250.227	273.038	284.23	271.159	257.897	276.784
Xelaev18000304m	DLAT	10736.3	1050.77	1162.69	1212.9	1171.12	1254.11	1212.9	1221.19	1237.69	1212.9
Xelaev18000317m	Xelaev18000317m	85.708	10.929	9.661	8.943	8.206	9.919	9.983	9.661	9.597	8.81
Xelaev18000361m	MED28	499.755	52.59	52.198	53.758	52.198	56.067	56.067	57.208	60.954	58.717
Xelaev18000370m	PRRC2B	407.531	43.261	36.063	47.464	41.915	45.905	46.687	49.765	47.979	48.492
Xelaev18000373m	NUP214	1229.18	150.35	135.515	145.461	132.484	139.521	134.507	132.484	129.43	129.43
Xelaev18000378m	CXORF56	293.151	30.672	28.951	28.298	27.64	33.617	33.409	32.574	38.498	39.492
Xelaev18000382m	C22ORF39	618.289	73.859	67.88	67.375	62.772	71.883	68.887	66.36	68.384	70.889
Xelaev18000384m	HIRA	176.641	19.497	17.025	21.181	18.492	20.625	20.345	20.485	19.211	19.781
Xelaev18000412m	KDELC2	2288.8	270.246	242.925	264.853	237.348	257.609	248.463	259.426	253.963	253.963
Xelaev18000414m	CALR	10798	1199.83	1191.27	1199.83	1199.83	1174.09	1233.86	1174.09	1225.39	1199.83
Xelaev18000429m	CCT5	16404.9	1809.51	1782.38	1836.49	1768.77	1823.02	1849.94	1741.43	1876.73	1916.68
Xelaev18000443m	SMG9	97.455	11.101	10.055	10.805	11.101	10.953	11.248	10.879	10.656	10.656
Xelaev18000461m	SUMO3	8378.97	933.138	883.061	939.332	914.468	945.513	945.513	939.332	951.681	926.929
Xelaev18000496m	GDAP2	324.718	36.116	33.153	36.912	35.85	36.647	37.964	36.912	35.048	36.116
Xelaev18000497m	WDR3	380.73	40.017	37.74	42.567	40.979	44.136	44.136	43.823	43.197	44.136
Xelaev18000507m	FH	21609.1	2284.16	2482.88	2375.16	2357.05	2393.22	2447.14	2393.22	2465.03	2411.24
Xelaev18000521m	LLGL1	1448.5	173.191	144.7	160.721	150.098	170.1	174.218	174.218	147.946	153.309
Xelaev18000522m	OSTC	889.538	98.92	94.348	101.504	96.316	102.146	102.146	99.568	96.969	97.621
Xelaev18000562m	VDAC2	66448.4	7322.66	7267.84	7322.66	7377.35	7322.66	7377.35	7377.35	7431.89	7648.68
Xelaev18000572m	ADK	9818.65	1125.05	1076.6	1100.91	1043.89	1100.91	1092.83	1084.72	1092.83	1100.91
Xelaev18000573m	VCL	10807.3	1211.78	1131.13	1211.78	1176.17	1220.62	1229.45	1220.62	1185.1	1220.62
Xelaev18000575m	CHUK	237.006	24.169	22.316	26.179	25.581	28.143	28.143	28.143	27.166	27.166
Xelaev18000578m	ANXA11	514.334	59.657	55.308	55.308	56.108	56.507	55.708	54.905	58.091	62.742
Xelaev18000590m	TIMM23	1829.68	204.439	188.552	198.706	204.439	212.948	205.864	207.287	205.864	201.579
Xelaev18000591m	HAUS7	745.13	80.427	78.713	84.386	76.41	87.18	87.18	88.844	82.131	79.857
Xelaev18000600m	GHITM	1269.95	143.836	138.737	141.804	147.872	143.836	138.737	143.836	134.612	136.679
Xelaev18000650m	GLUD1	1854.42	211.741	221.753	201.534	203.005	205.934	200.059	197.095	203.005	210.296
Xelaev18000665m	SNCG	4112.01	433.163	398.625	522.989	451.606	436.255	478.798	469.794	430.063	490.715
Xelaev18000673m	WAPL	113.55	10.365	10.064	12.308	12.497	13.242	14.155	13.701	13.883	13.334
Xelaev18000682m	CCSER2	7.64	0.799	0.596	0.884	0.767	0.847	0.868	0.966	0.9	1.012
Xelaev18000685m	MTTP	356.099	38.387	37.803	39.835	38.968	39.835	42.683	42.401	38.678	37.51
Xelaev18000728m	SLC44A2	38.468	4.291	3.942	4.147	4.434	4.434	4.234	4.491	4.089	4.406
Xelaev18000730m	ILF3	1082.08	110.491	86.55	105.891	103.09	112.309	121.219	131.56	144.027	166.942
Xelaev18000735m	QTRT1	1258.27	122.652	119.673	126.571	126.571	141.705	145.368	148.086	155.222	172.417
Xelaev18000741m	CARM1	6628.63	750.773	702.722	771.83	713.484	745.481	729.536	771.83	734.863	708.109
Xelaev18000742m	YIPF1	706.845	81.844	78.148	79.21	71.65	81.844	77.614	76.543	78.148	81.844
Xelaev18000743m	TIMM29	1939.17	211.882	204.082	218.053	211.882	221.117	224.167	214.975	219.587	213.43
Xelaev18000745m	SMARCA4	203.687	21.448	20.467	22.73	22.253	24.141	23.204	23.83	22.253	23.361
Xelaev18000746m	LDLR	117.782	13.066	12.013	14.599	13.924	15.51	13.839	13.153	11.022	10.655
Xelaev18000755m	PRKCSH	6506.98	736.061	725.931	741.106	690.021	761.15	715.744	710.629	705.499	720.845
Xelaev18000759m	ECSIT	1115.94	118.635	125.134	121.433	118.635	126.971	125.134	127.887	126.054	126.054
Xelaev18000762m	CNN1	336.36	74.45	27.963	49.56	39.088	26.621	23.874	26.351	24.153	44.299
Xelaev18000772m	GADD45GIP1	2147.32	243.251	226.423	239.923	229.827	241.589	241.589	238.252	238.252	248.21
Xelaev18000773m	TTC39A	128.67	14.955	12.07	14.955	13.187	15.147	14.761	14.177	14.079	15.339
Xelaev18000774m	CALR	3330.99	370.152	362.735	370.152	360.247	375.057	375.057	360.247	370.152	387.19
Xelaev18000775m	FARSA	1461.97	162.239	149.154	163.409	153.961	161.067	162.239	166.898	169.209	173.795
Xelaev18000793m	RAB3D	200.108	21.448	22.318	22.071	22.563	21.323	24.486	24.012	20.69	21.197
Xelaev18000801m	HOOK2	109.573	10.553	11.106	11.106	12.264	12.035	13.017	12.792	13.462	13.24
Xelaev18000810m	TRMT1	257.855	29.583	27.036	29.196	27.036	29.39	28.418	29.775	28.613	28.808
Xelaev18000813m	FBXW9	52.454	6.181	5.93	5.858	5.639	6.109	5.785	5.894	5.566	5.492
Xelaev18000814m	TNPO2	877.449	94.733	94.733	95.449	94.733	96.876	100.412	97.586	101.114	101.814
Xelaev18000816m	ASNA1	2576.45	300.28	262.164	289.847	272.912	296.12	285.642	281.418	294.034	294.034
Xelaev18000817m	CLPP	4936.06	539.179	546.785	535.36	558.122	542.987	554.353	550.574	558.122	550.574
Xelaev18000819m	PALM3	170.844	20.979	16.6	20.753	19.955	17.952	18.432	18.312	17.22	20.64
Xelaev18000828m	C19ORF53	13.825	2.303	1.896	1.989	1.478	1.533	1.191	1.152	1.111	1.172
Xelaev18000829m	KHSRP	1092.62	123.823	106.091	118.61	111.521	120.357	123.823	125.542	124.684	138.17
Xelaev18000833m	TUBB4B	2239.49	248.082	237.328	240.423	255.631	257.128	240.423	270.426	241.964	248.082
Xelaev18000834m	C3	91.603	9.593	9.824	10.129	10.129	10.432	10.356	10.657	9.977	10.507
Xelaev18000835m	C3	230.798	25.475	22.143	27.067	24.002	26.117	27.067	26.594	24.333	28.002
Xelaev18000863m	MBLAC1	1055.83	115.16	109.119	120.261	116.015	121.946	123.625	121.105	112.583	116.015
Xelaev18000867m	LAMTOR4	1428.98	155.849	142.547	151.053	148.638	154.654	161.78	162.959	178.049	173.449
Xelaev18000876m	AP4M1	94.294	10.231	10.014	10.662	10.159	11.016	10.804	10.946	10.087	10.375
Xelaev18000877m	MCM7	81.602	8.082	8.555	8.488	8.689	9.019	9.15	9.085	9.732	10.801
Xelaev18000878m	COPS6	964.479	104.442	106.762	109.063	101.319	105.217	106.762	104.442	113.614	112.86
Xelaev18000887m	AURKB	26.565	2.207	2.207	2.76	2.645	3.135	3.264	3.336	3.408	3.604
Xelaev18000926m	SLC25A11	3349.44	359.485	437.348	356.872	377.579	369.865	354.252	369.865	364.689	359.485
Xelaev18000928m	ZP2	368.191	35.834	33.168	46.565	43.186	48.376	38.117	35.504	51.937	35.504
Xelaev18000932m	MINK1	79.644	9.369	8.652	8.833	8.348	8.953	9.428	9.546	8.164	8.348
Xelaev18000936m	ZP3	4610.01	398.938	398.938	635.586	539.927	674.137	434.364	398.938	681.766	447.419
Xelaev18000944m	PSMB6	3946.75	431.907	422.408	431.907	441.343	441.343	450.719	441.343	450.719	435.059
Xelaev18000954m	FIS1	2977.18	339.06	329.92	345.86	339.06	323.008	336.783	339.06	336.783	287.648
Xelaev18000956m	PLSCR2	156.838	17.25	14.551	18.158	17.365	19.053	17.82	16.675	17.136	18.83
Xelaev18001004m	ZP3	1785.12	151.428	159.827	237.71	190.584	268.003	171.358	164.8	250.833	190.584
Xelaev18001011m	PLOD3	528.818	56.592	66.585	55.094	57.333	57.702	58.07	56.219	59.892	61.331
Xelaev18001014m	RNF13	74.682	8.182	8.123	7.767	8.416	8.241	8.474	8.358	8.358	8.764
Xelaev18001015m	PFN1	128736	13557.2	14318.4	14210.4	13993.8	14318.4	14318.4	13993.8	14747.4	15278.1
Xelaev18001020m	KIF1C	29.689	3.387	2.998	3.233	3.195	3.52	3.425	3.387	3.253	3.291
Xelaev18001047m	POP7	506.045	59.205	49.43	58.865	56.809	59.884	59.205	60.223	52.278	50.146
Xelaev18001053m	PPP1R35	100.904	10.416	10.788	11.811	11.303	11.739	11.303	11.449	11.157	10.936
Xelaev18001057m	MPDU1	195.383	21.312	21.6	22.741	20.732	22.315	22.03	21.023	21.6	22.03
Xelaev18001058m	EIF4A1	3141.44	359.793	335.643	374.043	342.943	345.366	359.793	350.195	345.366	328.294
Xelaev18001060m	SENP3	244.936	33.408	29.76	30.684	26.742	27.315	24.606	25.389	23.217	23.815
Xelaev18001081m	ELP5	341.836	37.512	35.888	38.314	36.432	38.845	39.374	39.11	37.78	38.58
Xelaev18001084m	YBX2	4839.65	604.271	543.03	570.086	550.804	562.399	535.22	527.372	491.571	454.899
Xelaev18001094m	POLR2A	26.275	2.772	2.226	3.041	2.808	3.303	2.988	3.058	3.146	2.934
Xelaev18001108m	TP53RK	2856.84	324.627	292.142	329.18	299.199	326.906	320.054	317.759	324.627	322.343
Xelaev18001119m	CHERP	220.678	24.949	21.175	25.581	23.012	26.051	26.518	25.581	23.339	24.471
Xelaev18001121m	EPS15L1	593.632	59.762	57.768	65.627	66.589	71.334	69.448	69.448	66.589	67.068
Xelaev18001127m	COPE	654.968	72.026	71.038	69.044	71.038	76.885	73.008	72.518	73.008	76.405
Xelaev18001128m	DDX49	148.073	18.627	18.434	19.204	17.948	16.865	15.558	15.761	13.053	12.622
Xelaev18001129m	HOMER3	148.968	16.534	15.432	16.315	15.765	18.465	16.315	16.206	16.643	17.293
Xelaev18001132m	SRP72	2154.33	255.732	222.54	245.421	229.664	243.688	243.688	243.688	236.712	233.197
Xelaev18001143m	NCLN	997.416	111.321	108.494	117.598	114.124	115.518	106.358	112.725	104.207	107.071
Xelaev18001151m	BORCS8	433.741	42.376	39.236	45.109	40.291	48.454	43.749	42.376	65.473	66.677
Xelaev18001155m	NGRN	105.967	11.955	10.17	11.688	12.482	12.417	11.755	12.872	11.621	11.008
Xelaev18001159m	GATAD2A	731.274	90.186	83.689	79.472	74.567	83.09	80.684	83.09	76.417	80.079
Xelaev18001164m	GTPBP3	929.286	102.757	94.137	105.07	101.207	105.837	105.07	105.837	104.301	105.07
Xelaev18001180m	CCDC124	1364.71	156.188	142.135	151.915	144.329	158.308	147.598	148.682	158.308	157.249
Xelaev18001195m	MYO9B	15.121	1.592	1.398	1.78	1.651	1.791	1.745	1.745	1.64	1.78
Xelaev18001201m	MAP1S	518.267	67.893	60.108	57.7	56.074	57.295	58.507	57.7	49.386	53.603
Xelaev18001214m	NANS	8216.43	906.655	874.431	919.418	893.821	951.02	913.045	906.655	906.655	944.733
Xelaev18001215m	TRIM14	89.403	9.144	8.786	9.638	9.847	10.399	10.942	10.467	9.986	10.193
Xelaev18001235m	DCAF10	140.751	16.088	14.344	16.514	15.441	16.727	16.088	15.98	14.785	14.785
Xelaev18001240m	SNX30	174.983	18.243	19.302	18.243	19.433	20.47	19.302	19.824	19.824	20.341
Xelaev18001242m	INIP	683.845	72.527	61.942	80.53	73.611	76.83	81.577	76.83	78.423	81.577
Xelaev18001244m	HSDL2	37284	4063.03	4094.3	4094.3	4125.5	4156.61	4125.5	4187.65	4249.5	4187.65
Xelaev18001252m	DNAJC25	759.732	84.296	83.133	83.715	85.454	87.178	86.03	87.178	80.785	81.962
Xelaev18001296m	NFATC2IP	294.05	32.713	28.705	32.943	31.319	33.859	34.313	33.173	32.713	34.313
Xelaev18001297m	EIF3CL	1279.54	140.12	144.818	149.461	138.937	141.3	140.12	149.461	129.336	145.983
Xelaev18001299m	ADPRH	2275.94	242.406	230.585	244.359	242.406	261.728	259.816	255.978	267.439	271.226
Xelaev18001314m	SPNS1	90.719	9.337	10.198	10.001	10.067	10.001	10.328	9.87	10.588	10.328
Xelaev18001321m	PITPNB	1132.86	128.999	122.557	126.6	122.557	129.795	125.796	126.6	122.557	127.402
Xelaev18001328m	EHD3	94.543	10.182	10.102	10.102	10.022	10.735	10.578	10.499	10.891	11.433
Xelaev18001331m	BOLA2	14859.9	1684.28	1557.68	1729.4	1650.12	1672.92	1684.28	1672.92	1604.16	1604.16
Xelaev18001337m	NUDT9	4110.98	461.311	434.066	461.311	447.756	464.68	461.311	461.311	454.55	464.68
Xelaev18001342m	ALDOA	18637.1	1970.16	1927.94	2011.96	2148.39	2107.91	2175.18	2053.34	2175.18	2067.05
Xelaev18001346m	MVP	1362.82	151.093	142.477	154.272	146.811	154.272	150.028	154.272	153.215	156.376
Xelaev18001350m	KIF22	249.74	16.671	15.082	19.721	21.916	26.348	32.071	34.399	38.311	45.221
Xelaev18001483m	DPPA2	886.547	82.016	75.764	85.848	84.322	103.57	107.14	119.703	106.429	121.756
Xelaev18001485m	NME2	85957.9	9425.12	9281.46	9425.12	9496.68	9568.07	10203	9851.91	9425.12	9281.46
Xelaev18001487m	NUFIP2	75.211	6.152	5.711	7.009	7.248	9.415	9.96	10.176	9.743	9.798
Xelaev18001507m	B2M	205.621	27.393	19.888	25.945	22.424	22.562	21.026	21.026	20.885	24.474
Xelaev18001521m	CTF1	271.943	25.574	23.074	26.787	26.787	31.627	34.21	29.922	37.245	36.717
Xelaev18001524m	STX4	1269.05	137.35	141.348	140.353	140.353	139.355	143.332	139.355	148.248	139.355
Xelaev18001528m	FBXL19	25.487	2.781	2.666	2.839	2.685	2.99	2.896	2.934	2.858	2.839
Xelaev18001532m	TRIM69	1839.43	226.43	215.516	197.251	190.032	202.946	195.817	195.817	200.107	215.516
Xelaev18001533m	KAT8	30.083	2.842	2.891	3.319	3.319	3.503	3.865	3.731	3.225	3.388
Xelaev18001534m	PRSS8	777.984	83.012	72.438	85.303	86.442	90.391	90.391	94.288	88.141	87.576
Xelaev18001535m	FUS	555.279	60.404	55.021	62.602	60.846	62.602	65.206	66.923	59.074	62.602
Xelaev18001541m	URGCP	606.487	64.631	59.732	66.548	65.592	72.17	71.709	74.461	64.148	67.498
Xelaev18001553m	URGCP	17.172	1.77	1.822	1.885	1.923	2.17	1.948	1.986	1.923	1.744
Xelaev18001563m	PRF1	12.372	1.153	1.091	1.133	1.355	1.463	1.501	1.52	1.558	1.596
Xelaev18001575m	MAPK7	127.807	14.143	12.519	14.237	14.516	14.516	14.887	14.609	14.143	14.237
Xelaev18001577m	TRIM69	21.384	2.352	2.183	2.497	2.394	2.477	2.394	2.332	2.054	2.7
Xelaev18001582m	RNF112	780.146	85.998	80.23	89.774	86.631	89.774	89.149	89.774	83.451	85.364
Xelaev18001653m	Xelaev18001653m	139.692	15.392	13.897	15.706	14.005	16.432	15.392	15.286	17.047	16.535
Xelaev18001669m	IRGC	119.701	13.378	12.3	13.46	12.718	13.132	14.27	13.214	14.51	12.718
Xelaev18001677m	ADAR	813.438	90.472	87.386	86.866	85.823	90.472	88.42	91.49	95.013	97.493
Xelaev18001735m	PPIF	16117.1	1821.54	1821.54	1782.67	1677.45	1769.64	1717.18	1730.35	1911.07	1885.65
Xelaev18001739m	NDUFA13	9360.07	1051.11	989.596	1035.84	1012.81	1058.71	1058.71	1058.71	1043.48	1051.11
Xelaev18001743m	Xelaev18001743m	1002.24	113.488	105.539	113.488	109.538	118.943	113.488	113.488	104.733	109.538
Xelaev18001770m	PDHB	7375.02	731.482	852.797	805.034	805.034	840.944	846.878	840.944	846.878	805.034
Xelaev18001771m	KCTD6	140.69	14.807	13.324	15.675	15.961	16.056	16.529	16.529	14.904	16.904
Xelaev18001774m	APPL1	138.465	16.717	15.623	15.512	14.842	16.064	15.179	14.955	14.73	14.842
Xelaev18001782m	CCDC66	65.464	6.927	6.171	7.607	7.138	7.556	7.762	7.607	7.348	7.348
Xelaev18001801m	DCP1A	224.748	22.599	21.113	25.644	23.69	26.687	26.168	26.687	25.644	26.515
Xelaev18001802m	TKT	18046.1	2225.61	1927.28	2071.26	1941.85	1970.87	1912.68	1985.32	1883.34	2127.85
Xelaev18001820m	BOD1	819.458	112.293	101.948	108.708	86.317	84.65	86.317	84.092	80.719	74.414
Xelaev18001826m	FAM120A	107.003	12.381	10.702	12.463	11.383	11.802	12.463	12.789	11.383	11.635
Xelaev18001836m	CNBP	750.37	90.131	78.479	87.269	80.263	84.955	83.791	84.374	79.075	82.033
Xelaev18001837m	TSEN2	156.68	17.441	16.162	17.694	16.933	18.816	17.188	17.188	17.188	18.07
Xelaev18001838m	YIPF4	719.408	81.784	75.245	86.586	73.584	88.17	82.858	81.245	74.139	75.796
Xelaev18001839m	NUP210	1022.43	97.253	93.603	116.61	114.895	121.706	120.015	118.316	120.015	120.015
Xelaev18001856m	ATG7	3554.26	391.763	377.307	397.491	386.004	403.19	403.19	403.19	394.631	397.491
Xelaev18001868m	RAF1	39.479	3.861	4.028	4.221	3.945	4.812	4.733	4.68	4.68	4.519
Xelaev18001869m	MKRN2	746.825	85.838	81.569	83.407	77.851	87.646	79.097	81.569	83.407	86.442
Xelaev18001871m	ISY1	2828.5	314.321	298.608	316.541	305.38	325.363	320.964	325.363	309.863	312.095
Xelaev18001873m	ITIH3	421.729	47.992	42.381	47.992	45.378	47.992	48.639	48.962	45.048	47.343
Xelaev18001875m	MTO1	198.328	21.458	21.981	21.589	21.72	22.629	22.886	22.629	21.195	22.241
Xelaev18001903m	GSE1	33.686	3.676	3.551	4.044	3.651	3.947	3.971	3.898	3.525	3.424
Xelaev18001918m	BANP	150.475	15.992	15.436	18.795	16.432	18.054	18.054	17.626	15.099	14.987
Xelaev18001923m	ZC3H18	91.097	9.573	8.666	9.979	9.159	10.313	10.445	10.838	10.708	11.416
Xelaev18001929m	UBA2	1422.71	155.271	153.045	157.484	155.271	160.782	161.875	165.137	159.686	154.16
Xelaev18001932m	GPI	25692.3	2822.79	3010.7	2801.64	2780.43	2801.64	2759.16	2695	2948.54	3072.4
Xelaev18001936m	LSM14A	2814.49	315.072	296.386	308.104	308.104	321.995	324.293	319.692	305.771	315.072
Xelaev18001943m	PEPD	1921.13	204.697	210.689	209.197	212.177	213.66	223.94	222.483	218.089	206.201
Xelaev18001977m	UBL4A	2092.46	238.271	213.409	252.785	215.095	249.584	235.007	239.898	213.409	235.007
Xelaev18001979m	LIN54	62.175	6.605	5.838	7.101	6.199	7.003	7.54	7.394	7.394	7.101
Xelaev18001982m	HELQ	23.449	2.586	2.406	2.728	2.551	2.657	2.657	2.745	2.586	2.533
Xelaev18002012m	HNRNPDL	2419.62	261.539	244.627	246.533	250.324	276.15	265.227	259.686	311.194	304.339
Xelaev18002013m	ENOPH1	372.219	41.325	40.088	41.017	40.708	42.246	41.633	42.552	41.017	41.633
Xelaev18002023m	NUP98	2505.92	321.219	250.404	256.36	262.274	266.193	289.353	275.916	277.848	306.351
Xelaev18002032m	NUP205	1757.07	184.967	174.426	194.039	196.607	205.513	214.301	197.887	199.164	190.168
Xelaev18002040m	NTPCR	1196.26	135.592	124.628	130.647	123.615	136.574	134.608	132.632	144.345	133.621
Xelaev18002043m	ALYREF	511.953	40.344	36.427	48.287	48.741	57.546	60.945	63.869	77.897	77.897
Xelaev18002048m	P4HB	22024.1	2411.41	2553.85	2411.41	2429.37	2465.16	2393.4	2500.77	2429.37	2429.37
Xelaev18002092m	DGKE	178.219	19.774	18.789	20.744	18.931	20.606	20.192	19.774	19.494	19.914
Xelaev18002115m	ASRGL1	1496.51	161.104	167.41	164.898	163.636	167.41	167.41	161.104	168.662	174.874
Xelaev18002130m	COL12A1	71.141	17.392	5.615	8.376	8.665	5.017	4.881	5.219	4.881	11.096
Xelaev18002133m	FILIP1	19.749	2.253	1.972	1.972	1.986	2.239	2.322	2.294	2.253	2.457
Xelaev18002134m	SENP6	50.684	5.701	5.203	6.076	5.434	5.814	5.852	5.852	5.203	5.549
Xelaev18002147m	SH3BGRL2	438.601	47.667	44.633	46.767	47.667	51.764	49.443	49.15	50.61	50.9
Xelaev18002149m	DDX43	2879.99	326.593	309.934	319.489	309.934	324.231	326.593	321.863	319.489	321.863
Xelaev18002150m	TTK	313.91	32.339	29.105	34.692	32.604	36.736	35.974	35.974	38.243	38.243
Xelaev18002152m	BCKDHB	843.752	90.292	95.039	91.656	88.235	95.039	97.72	92.335	96.383	97.052
Xelaev18002154m	IBTK	186.084	21.101	20.949	21.252	20.186	21.554	20.645	20.949	19.724	19.724
Xelaev18002158m	EIF2S1	4798.07	538.399	494.307	532.211	525.988	544.552	535.309	535.309	532.211	559.787
Xelaev18002187m	NMRAL1	3527.48	390.271	329.752	400.858	398.222	406.11	411.334	434.519	382.253	374.166
Xelaev18002191m	HMOX2	668.22	76.283	66.797	71.309	74.636	77.92	77.376	74.636	76.283	72.978
Xelaev18002193m	TUFM	18207.6	1912.49	1974.27	1943.46	1974.27	2050.62	2095.99	2004.92	2185.8	2065.78
Xelaev18002195m	ATXN2L	933.148	101.622	95.004	102.347	103.07	108.074	105.226	105.941	108.074	103.79
Xelaev18002198m	MTO1	252.792	27.164	25.704	28.601	26.541	28.193	28.397	29.211	27.371	31.611
Xelaev18002199m	PPP1CA	1288.7	153.063	151.336	141.702	141.702	147.86	149.602	143.472	127.233	132.727
Xelaev18002234m	EIF3CL	540.441	62.282	56.577	60.983	59.235	62.282	58.354	63.143	57.911	59.673
Xelaev18002241m	CD274	1544.22	208.324	156.108	187.729	165.144	171.507	167.698	163.862	158.705	165.144
Xelaev18002253m	PITPNB	2774.84	308.373	289.484	306.298	306.298	326.81	310.443	310.443	302.129	314.567
Xelaev18002259m	EHD3	182.992	22.851	26.302	19.971	20.557	19.38	18.784	18.03	18.634	18.483
Xelaev18002260m	SGF29	135.174	12.368	20.46	13.578	15.797	14.168	14.46	14.266	14.943	15.134
Xelaev18002268m	ALDOA	20728	2291.61	2196.67	2400.2	2384.83	2196.67	2307.26	2196.67	2353.93	2400.2
Xelaev18002270m	MVP	871.373	97.69	89.947	95.782	95.142	100.207	100.207	100.207	97.69	94.5
Xelaev18002272m	KIF22	73.903	5.734	5.796	7.065	7.529	9.037	8.764	9.146	10.052	10.781
Xelaev18002356m	HIRIP3	540.287	59.253	56.423	58.451	58.048	62.021	62.801	63.19	60.447	59.652
Xelaev18002359m	NME2	7628.33	810.807	823.171	847.694	841.588	835.466	877.982	853.783	877.982	859.857
Xelaev18002388m	LAMTOR1	792.021	93.761	97.536	89.94	84.768	91.219	91.856	89.298	75.479	78.166
Xelaev18002399m	PSMC3IP	555.365	62.372	55.992	61.956	61.538	64.44	61.538	63.203	61.956	62.372
Xelaev18002400m	Xelaev18002400m	37.907	4.768	3.887	4.362	4.084	4.362	4.14	3.887	4.056	4.362
Xelaev18002402m	RETREG3	772.743	90.007	76.239	88.249	86.481	90.59	84.106	84.702	85.296	87.072
Xelaev18002413m	Xelaev18002413m	626.288	72.628	67.515	70.786	66.093	71.248	70.322	70.786	68.924	67.986
Xelaev18002419m	SLC39A11	352.333	38.326	32.814	42.304	36.699	42.565	38.863	40.991	36.426	43.345
Xelaev18002454m	BRAF	652.426	96.1	63.99	70.431	65.077	75.147	73.585	70.431	67.234	70.431
Xelaev18002462m	LCHN	111.632	11.541	11.714	12.654	11.628	12.738	13.407	12.315	12.229	13.407
Xelaev18002464m	SSBP1	708.713	77.906	82.963	74.797	77.392	78.93	78.93	77.906	80.958	78.93
Xelaev18002471m	MTPN	16567.4	1823.24	1823.24	1823.24	1836.48	1836.48	1889.09	1809.97	1862.85	1862.85
Xelaev18002475m	NUP205	468.124	50.367	50.741	51.114	52.963	52.963	54.426	52.226	53.33	49.992
Xelaev18002485m	FBXO7	208.171	23.524	22.708	23.794	22.571	23.524	22.708	23.928	22.433	22.982
Xelaev18002487m	RTCB	2495.01	282.867	260.444	284.873	266.627	282.867	274.79	280.856	276.817	284.873
Xelaev18002491m	AKR1B1	13471.9	1523.61	1365.21	1490.16	1411.08	1534.7	1467.71	1456.45	1578.81	1644.2
Xelaev18002493m	AKR1C1	3058.1	327.249	332.093	334.506	348.841	348.841	341.702	358.273	334.506	332.093
Xelaev18002495m	AKR1C3	332.209	35.573	32.749	35.014	38.058	39.418	36.684	38.058	37.236	39.418
Xelaev18002496m	AKR1C3	2020.86	233.845	191.546	230.677	225.899	221.092	227.495	230.677	219.482	240.145
Xelaev18002497m	AKR1C4	7385.18	857.93	756.914	810.963	805.023	828.688	810.963	834.566	799.068	881.065
Xelaev18002502m	TRIM24	33.194	4.016	3.767	4.083	3.767	4.016	3.744	3.419	3.372	3.012
Xelaev18002508m	TBXAS1	77.821	8.568	8.012	8.751	8.136	7.251	7.187	7.507	10.469	11.94
Xelaev18002525m	BORCS5	2562.85	282.033	265.098	290.385	294.533	288.304	296.601	296.601	269.362	279.934
Xelaev18002534m	ATP6V1E1	1791.79	193.214	202.104	194.496	189.342	200.846	199.584	191.928	203.359	216.917
Xelaev18002535m	BCL2L13	695.744	80.264	75.361	77.553	75.911	78.098	79.183	77.553	75.361	76.46
Xelaev18002559m	ACTR8	262.424	28.683	26.927	30.62	28.247	30.407	30.193	29.549	28.683	29.117
Xelaev18002562m	DCP1A	53.275	5.655	5.21	5.931	5.774	6.241	6.28	6.048	5.931	6.203
Xelaev18002563m	TKT	5723.12	1063.25	481.451	784.349	593.72	510.431	496.026	486.329	471.635	835.931
Xelaev18002578m	FAM120A	64.162	7.26	6.977	7.213	7.119	7.024	7.307	7.213	7.119	6.929
Xelaev18002582m	CNBP	1635.06	200.387	175.239	183.42	177.595	178.767	185.725	178.767	174.056	181.101
Xelaev18002590m	ACAD9	24014.4	2641.57	2661.64	2661.64	2621.46	2661.64	2661.64	2681.65	2701.62	2721.54
Xelaev18002597m	TAMM41	1329.02	143.896	139.584	149.225	146.036	149.225	153.443	146.036	155.537	146.036
Xelaev18002608m	RAB43	177.463	19.898	16.39	20.378	19.29	21.209	20.617	19.29	19.534	20.855
Xelaev18002614m	NEK4	64.615	7.193	6.841	7.588	6.942	7.441	7.588	7.242	6.637	7.143
Xelaev18002617m	PBRM1	93.238	8.446	7.565	10.597	10.731	11.063	11.846	11.063	11.063	10.864
Xelaev18002619m	NISCH	44.014	5.173	4.527	4.723	4.527	4.982	4.788	4.918	5.109	5.267
Xelaev18002620m	MRPL9	3314.71	364.291	351.149	382.417	359.055	374.687	374.687	377.27	372.097	359.055
Xelaev18002627m	Xelaev18002627m	86.648	9.785	8.656	9.716	10.335	10.061	9.785	9.367	9.226	9.716
Xelaev18002646m	DDX4	303.576	37.834	34.236	34.722	31.274	35.447	33.258	32.518	33.012	31.274
Xelaev18002696m	MTA1	173.286	17.733	17.733	18.681	19.747	20.011	19.614	19.747	20.011	20.011
Xelaev18002699m	NUSAP1	132.534	12.315	10.964	12.786	12.598	17.047	16.621	17.132	16.792	16.278
Xelaev18002736m	SYCP2L	136.183	13.877	17.678	30.992	23.359	14.513	10.538	8.741	8.243	8.243
Xelaev18002749m	SIRT5	2395.7	274.143	257.961	274.143	247.664	262.04	253.86	251.801	286.061	288.03
Xelaev18002750m	RANBP9	156.081	18.231	16.51	17.429	17.63	17.327	19.021	15.888	16.818	17.226
Xelaev18002783m	C9ORF78	722.403	77.308	69.588	80.773	75.553	85.307	82.484	86.427	81.345	83.618
Xelaev18002785m	USP20	39.477	4.188	4.367	4.397	4.456	4.602	4.485	4.485	4.308	4.188
Xelaev18002789m	TBC1D13	411.301	45.591	43.899	45.254	45.591	45.927	46.597	44.917	45.927	47.596
Xelaev18002793m	PKN2	58.578	6.145	5.699	6.344	6.185	7.082	7.12	7.12	6.185	6.697
Xelaev18002794m	WDR34	287.447	30.291	28.355	32.423	31.244	33.589	32.891	33.357	31.244	34.051
Xelaev18002795m	SPTAN1	794.629	94.027	89.012	90.904	87.105	89.012	87.105	87.742	84.539	85.183
Xelaev18002798m	GLE1	515.849	58.519	52.061	63.119	56.819	59.784	58.096	56.819	56.392	54.24
Xelaev18002801m	CIZ1	17.95	2.032	1.88	2.042	2.01	2.064	1.989	2.064	1.946	1.924
Xelaev18002803m	PTGES2	2347.81	250.99	241.105	249.024	258.798	262.671	270.356	268.442	276.07	270.356
Xelaev18002809m	KYAT1	198.014	26.517	20.943	23.253	21.721	21.1	20.472	19.838	20.314	23.856
Xelaev18002813m	SLC27A4	90.336	9.945	9.448	10.295	9.662	9.945	10.504	10.226	10.086	10.226
Xelaev18002816m	COLGALT1	686.575	76.732	73.884	75.597	76.732	78.986	77.298	77.862	74.457	75.027
Xelaev18002818m	CCDC22	793.726	83.214	88.495	84.544	87.84	89.799	89.799	89.799	91.743	88.495
Xelaev18002825m	KDM5C	121.886	14.245	12.473	13.601	13.228	14.518	14.245	14.062	12.473	13.041
Xelaev18002832m	SEPHS2	1606.37	177.372	187.495	177.372	170.94	182.458	176.092	181.192	179.922	173.523
Xelaev18002833m	IKBKG	76.645	8.209	7.713	8.331	8.086	8.453	9.408	8.935	8.575	8.935
Xelaev18002834m	G6PD	9697.89	1106.64	994.86	1106.64	1051.24	1106.64	1098.78	1067.16	1067.16	1098.78
Xelaev18002839m	HUWE1	1684.71	189.043	176.536	189.043	182.131	191.783	189.043	189.043	189.043	189.043
Xelaev18002841m	FLNA	3878.44	469.279	400.37	447.758	422.714	429.022	413.189	422.714	416.373	457.024
Xelaev18002846m	Xelaev18002846m	26.949	3.249	3.021	3.361	2.983	3.249	2.866	3.002	2.589	2.629
Xelaev18002853m	HCFC1	545.864	62.674	55.097	61.359	58.702	61.798	63.979	64.412	60.035	57.808
Xelaev18002856m	IRAK1	344.155	37.812	34.671	39.213	37.247	40.046	39.769	39.213	37.53	38.654
Xelaev18002900m	MSN	6599.93	757.411	684.584	742.047	731.733	752.303	726.555	757.411	716.154	731.733
Xelaev18002901m	FDX1	162.087	33.164	12.963	21.466	19.652	13.222	11.777	11.374	11.91	26.559
Xelaev18002941m	PSMA5	13362.2	1409.18	1549.13	1441.91	1506.58	1463.58	1431.03	1452.76	1495.87	1612.17
Xelaev18002992m	WASH2P	293.148	31.211	31.449	31.449	33.098	33.797	33.564	33.797	33.098	31.686
Xelaev18003001m	WNK1	267.794	38.055	34.901	28.051	27.183	28.051	27.618	28.482	27.401	28.051
Xelaev18003002m	ERC1	119.932	13.346	11.219	13.346	13.088	13.687	14.277	13.772	13.088	14.11
Xelaev18003039m	FAM208A	74.829	7.758	7.046	7.708	7.858	8.59	8.781	8.494	9.251	9.344
Xelaev18003043m	IL17RD	29.475	2.441	2.822	3.148	3.248	3.81	3.997	3.657	3.386	2.966
Xelaev18003048m	PDHB	18558.5	1830.4	2246.14	1956.7	2125.93	2064.95	2034.22	2003.34	2095.52	2201.33
Xelaev18003049m	PXK	226.985	23.672	21.66	24.748	24.925	27.203	27.203	25.28	24.748	27.548
Xelaev18003050m	HTD2	634.601	74.955	66.421	68.963	66.932	75.94	69.468	71.978	69.972	69.972
Xelaev18003051m	RPP14	259.496	29.902	28.061	28.473	28.679	28.679	30.911	29.292	27.439	28.061
Xelaev18003052m	SCO2	1643.55	182.509	167.368	183.866	172.922	189.261	185.219	187.917	186.569	187.917
Xelaev18003062m	FLNA	1063.41	180.381	96.08	133.691	110.924	101.928	106.045	102.755	91.838	139.766
Xelaev18003078m	TGM2	81.256	19.08	6.666	11.308	8.755	5.209	5.805	6.096	5.209	13.128
Xelaev18003079m	RPRD1B	469.276	51.291	47.458	49.56	49.56	57.713	54.362	54.362	50.946	54.024
Xelaev18003080m	TTI1	41.613	4.475	4.877	4.711	4.509	4.744	4.91	4.711	4.373	4.305
Xelaev18003084m	CTNNBL1	347.757	36.633	35.797	38.013	37.738	40.455	39.105	39.646	40.455	39.916
Xelaev18003086m	SRC	332.177	36.42	36.948	39.037	36.155	37.736	39.037	37.474	35.088	34.281
Xelaev18003088m	MANBAL	310.357	34.491	33.421	32.775	32.558	35.763	35.973	36.393	34.278	34.704
Xelaev18003090m	RPN2	5538.8	629.893	595.089	621.266	590.681	625.585	616.934	608.234	616.934	634.188
Xelaev18003092m	LPIN3	183.169	19.305	18.84	19.151	19.305	21.285	22.032	21.585	20.984	20.682
Xelaev18003093m	MYL9	754.774	63.346	66.938	73.093	55.029	63.346	64.25	62.438	157.004	149.329
Xelaev18003094m	TGIF2	202.028	22.138	20.018	18.68	20.841	22.778	24.198	24.51	24.666	24.198
Xelaev18003098m	AAR2	899.952	98.191	93.101	96.747	96.747	103.89	101.055	100.342	106.695	103.184
Xelaev18003100m	SRSF6	4058.32	485.727	393.079	437.247	452.608	467.773	464.755	485.727	437.247	434.15
Xelaev18003102m	IFT52	482.794	53.271	51.734	54.792	51.734	55.924	55.924	54.792	52.12	52.504
Xelaev18003103m	Xelaev18003103m	12079.4	1421.28	1326.4	1364.65	1326.4	1374.15	1316.78	1278.01	1364.65	1307.12
Xelaev18003153m	ABCB8	154.208	16.933	15.679	16.184	17.18	17.427	18.158	17.794	17.304	17.549
Xelaev18003154m	CDK5	957.958	107.291	99.719	105.041	102.773	108.037	108.037	110.264	105.793	111.002
Xelaev18003160m	AGAP3	94.788	10.727	9.689	10.854	10.277	10.47	10.982	11.108	10.147	10.535
Xelaev18003189m	ZNF250	34.097	3.636	3.406	3.957	3.585	3.81	3.859	3.932	3.859	4.053
Xelaev18003199m	NGRN	57.11	6.124	5.912	6.418	6.542	6.789	6.666	6.666	6.124	5.869
Xelaev18003207m	RRAGC	1001.47	111.681	113.313	106.734	105.901	103.389	117.355	110.862	120.553	111.681
Xelaev18003248m	PSMD1	2335.14	259.483	250.188	257.634	253.922	264.998	255.781	259.483	264.998	268.65
Xelaev18003250m	ARMC9	152.053	15.188	13.095	16.073	16.447	17.31	18.638	19.113	17.432	18.757
Xelaev18003255m	NCL	18181.5	2125.08	1923.79	2039.77	1923.79	2068.36	1982.11	2039.77	1982.11	2096.79
Xelaev18003257m	PTMA	5716.94	735.697	600.561	640.583	636.637	575.909	592.4	592.4	592.4	750.349
Xelaev18003261m	PDE6D	4800.43	542.731	470.593	546.445	501.349	564.901	531.543	561.225	553.85	527.798
Xelaev18003265m	DIS3L2	350.355	32.549	40.442	34.891	33.024	37.159	39.363	42.351	42.141	48.436
Xelaev18003279m	Xelaev18003279m	1666.21	186.24	172.197	187.626	183.459	190.388	190.388	189.008	180.664	186.24
Xelaev18003285m	DHX8	329.673	37.096	33.272	36.628	32.781	38.257	37.794	37.794	37.794	38.257
Xelaev18003293m	CWF19L2	333.311	33.377	31.988	36.627	35.825	39.256	39.515	39.256	37.95	39.515
Xelaev18003299m	CUL5	805.606	87.246	84.659	92.341	88.529	91.71	92.341	89.168	89.806	89.806
Xelaev18003300m	ACAT1	4060.12	447.039	462.344	447.039	447.039	459.302	443.95	456.25	450.119	447.039
Xelaev18003303m	KDELC2	1494.62	170.71	167.345	166.218	160.536	158.241	169.592	165.088	172.939	163.954
Xelaev18003304m	KDELC1	1981.88	225.334	215.913	222.207	217.491	236.178	209.563	198.307	231.549	225.334
Xelaev18003325m	TOR1B	75.32	7.975	7.239	8.197	8.031	8.853	8.473	8.961	8.363	9.229
Xelaev18003332m	PTPA	1047.48	115.459	109.14	120.101	113.107	115.459	117.79	119.333	115.459	121.632
Xelaev18003333m	CRAT	1341.24	150.76	141.851	149.656	144.095	152.96	150.76	154.056	148.549	148.549
Xelaev18003343m	FUBP3	436.527	45.496	41.691	46.511	47.183	49.176	49.833	52.106	51.461	53.068
Xelaev18003372m	WDR24	38.457	3.872	4.377	4.06	3.736	4.167	4.429	4.377	4.377	5.064
Xelaev18003380m	ATXN2L	1089.86	116.32	107.41	122.412	116.32	125.845	130.932	128.397	122.412	119.815
Xelaev18003383m	PPP1CA	1320.77	163.997	161.055	145.034	141.961	142.988	140.932	138.866	138.866	147.069
Xelaev18003386m	RABEP2	60.07	6.746	6.507	6.935	6.217	7.029	6.65	6.362	6.362	7.262
Xelaev18003428m	TECPR1	54.141	5.81	6.441	6.233	5.938	6.149	5.552	5.724	5.853	6.441
Xelaev18003533m	SLC2A7	227.319	25.689	24.765	24.3	25.382	26.904	25.689	23.674	25.382	25.535
Xelaev18003542m	TSR2	1240.81	137.218	129.078	137.218	132.149	141.232	143.226	138.225	141.232	141.232
Xelaev18003547m	APEX2	212.129	23.428	22.074	23.596	22.924	24.756	24.426	25.247	22.585	23.092
Xelaev18003549m	BGN	12.588	3.029	1.264	1.534	1.473	0.945	1.025	1.045	0.935	1.338
Xelaev18003564m	VPS9D1	470.015	50.489	46.965	52.793	50.489	53.174	55.065	53.554	53.933	53.554
Xelaev18003566m	SPATA2L	373.075	42.973	37.774	42.973	40.551	43.87	42.07	41.767	41.464	39.632
Xelaev18003574m	SPG7	2789.64	311.026	292.22	313.351	301.67	315.67	313.351	315.67	308.696	317.984
Xelaev18003582m	PABPN1	1595.98	183.473	167.476	175.03	178.219	190.707	170.734	182.428	176.097	171.813
Xelaev18003583m	TRAPPC2L	613.897	62.983	57.986	66.88	68.321	73.048	71.641	70.225	71.641	71.171
Xelaev18003585m	GALNS	686.439	76.209	74.48	75.634	75.634	76.209	76.782	76.782	76.782	77.926
Xelaev18003586m	APRT	1002.28	112.205	103.899	109.734	107.246	113.025	116.286	115.474	113.025	111.384
Xelaev18003587m	CDT1	73.89	4.24	4.24	5.493	5.774	7.754	10.04	11.007	12.217	13.126
Xelaev18003589m	CTU2	690.066	70.686	70.686	75.228	72.969	76.905	80.769	79.672	79.122	84.029
Xelaev18003594m	Xelaev18003594m	7698.13	870.958	791.377	894.874	846.784	882.947	852.852	876.96	846.784	834.596
Xelaev18003596m	DYNC1LI2	149.025	17.391	15.754	17.068	16.415	16.851	15.975	16.743	16.743	16.086
Xelaev18003601m	PPIA	851.305	125.865	78.75	94.783	84.195	96.728	86.21	78.75	94.132	111.893
Xelaev18003612m	LACTB2	1933.21	213.457	200.75	221.268	203.952	224.367	218.155	221.268	208.723	221.268
Xelaev18003627m	RPL7	43521.1	4868.18	4401.45	4832.83	4726.23	5043.69	4973.73	4938.63	4868.18	4868.18
Xelaev18003631m	STAU2	753.904	86.881	73.365	83.877	81.446	88.073	85.083	89.851	82.664	82.664
Xelaev18003640m	IPO11	733.386	81.563	77.861	82.175	79.1	84.003	82.785	84.003	80.334	81.563
Xelaev18003647m	CWC27	896.68	99.916	90.94	99.179	92.457	102.846	100.651	101.385	102.116	107.19
Xelaev18003681m	NOP56	2904.98	339.428	291.085	330.436	321.348	328.173	323.629	323.629	325.904	321.348
Xelaev18003685m	WDR54	470.168	52.018	48.789	51.307	50.95	54.478	55.865	52.725	52.372	51.663
Xelaev18003693m	DOK1	127.442	13.775	12.505	14.601	13.461	14.498	14.805	14.19	15.109	14.498
Xelaev18003694m	MRPS26	2921.13	311.545	316.179	320.787	320.787	327.65	336.715	334.458	329.926	323.081
Xelaev18003696m	DQX1	144.62	15.602	15.009	16.189	15.838	16.884	16.769	16.653	15.72	15.955
Xelaev18003708m	TTC31	118.944	13.965	12.59	14.471	13.369	13.965	13.024	13.88	11.885	11.796
Xelaev18003710m	MOGS	1667.58	174.643	178.788	181.533	181.533	192.372	188.333	191.029	186.98	192.372
Xelaev18003717m	HHIPL1	1523.26	182.744	130.59	172.282	159.474	170.167	181.706	178.581	175.44	172.282
Xelaev18003721m	MIA2	110.959	11.555	10.515	12.2	11.274	12.474	12.655	13.193	13.37	13.723
Xelaev18003759m	TOMM20	1099.3	126.402	124.439	116.428	117.106	124.439	120.466	122.461	123.122	124.439
Xelaev18003790m	NMRAL1	4860.75	553.05	450.503	533.865	553.05	560.661	572.012	601.916	556.86	478.833
Xelaev18003798m	SMARCA2	25.769	2.698	2.345	2.964	2.907	3.02	3.02	2.945	2.851	3.02
Xelaev18003802m	VLDLR	973.677	120.23	112.887	124.559	114.369	123.842	118.044	107.646	78.185	73.914
Xelaev18003804m	PUM3	395.524	47.574	41.918	46.699	43.132	44.631	44.929	43.734	40.381	42.526
Xelaev18003819m	CDC37L1	166.357	17.841	19.678	18.214	18.338	18.461	17.591	18.707	18.09	19.437
Xelaev18003840m	DAP	3038.26	347.689	313.111	347.689	323.116	345.259	340.38	337.932	330.552	352.533
Xelaev18003848m	CCT5	18218.7	1896.78	1973.58	1912.22	1927.63	2064.4	2004.01	1912.22	2271.22	2256.67
Xelaev18003854m	INO80C	539.133	60.191	58.911	60.615	58.482	62.304	59.765	58.911	60.615	59.339
Xelaev18003902m	SFXN2	308.377	34.612	30.849	37.121	33.218	35.532	34.843	34.15	32.749	35.303
Xelaev18003904m	CYP17A1	1174.85	179.879	149.68	158.484	140.713	141.618	123.17	112.659	89.616	79.028
Xelaev18003918m	PDCD11	303.02	38.203	30.126	37.517	35.429	35.663	33.774	33.056	29.126	30.126
Xelaev18003934m	TMEM192	565.341	61.606	62.428	64.465	62.837	64.06	67.678	64.87	59.117	58.28
Xelaev18003942m	TMA16	419.514	45.487	46.74	44.856	43.902	47.052	44.221	45.802	50.425	51.028
Xelaev18003956m	ETHE1	1355.41	170.062	130.72	157.076	136.748	158.018	136.748	146.567	148.5	170.975
Xelaev18003960m	XRCC1	112.388	15.411	16.316	13.858	11.311	11.481	11.566	11.396	11.139	9.91
Xelaev18003966m	RPS19	8044.71	872.505	847.933	878.599	908.785	914.767	950.294	908.785	902.785	860.259
Xelaev18004029m	MYORG	280.186	31.313	29.513	31.313	29.286	31.313	33.082	32.642	31.535	30.192
Xelaev18004043m	YARS	2122.97	234.347	224.815	239.056	229.601	242.175	232.77	234.347	237.491	248.364
Xelaev18004046m	RBBP4	607.632	57.244	57.244	63.917	56.334	67.373	56.79	57.244	94.99	96.497
Xelaev18004050m	AK2	10116.4	1141.27	1208.47	1087.8	1110.86	1118.49	1095.51	1056.73	1118.49	1178.81
Xelaev18004054m	MACF1	126.72	14.454	13.069	14.454	13.37	14.356	14.935	14.55	13.37	14.161
Xelaev18004058m	FUCA1	1899.18	211.727	206.992	213.298	210.152	211.727	211.727	205.406	216.429	211.727
Xelaev18004059m	GALE	3095.25	338.997	321.201	349.023	326.32	351.514	336.475	341.513	361.419	368.787
Xelaev18004060m	LYPLA2	17241.1	1912.7	1953.54	1912.7	1857.74	1939.96	1899.02	1912.7	1926.35	1926.35
Xelaev18004063m	RPL11	50338.4	5779.7	5013.8	5661.29	5541.98	5779.7	5502.01	5936.26	5621.62	5502.01
Xelaev18004064m	EEF1A1	19385.9	2097.83	2067.57	2142.88	2052.37	2187.54	2172.69	2142.88	2231.82	2290.31
Xelaev18004066m	CAP1	6791.75	952.957	831.761	768.692	698.136	720.115	714.644	703.655	703.655	698.136
Xelaev18004195m	CAPNS1	1175.84	156.769	123.597	137.059	126.334	129.947	123.597	125.424	114.301	138.815
Xelaev18004200m	KIF17	74.85	8.368	7.873	8.314	8.094	8.748	8.962	8.694	7.594	8.204
Xelaev18004219m	ACSBG2	200.586	22.063	23.985	22.549	22.871	23.031	22.71	22.549	20.915	19.914
Xelaev18004220m	HINT2	7376.34	819.125	757.254	800.722	775.976	855.551	825.231	843.464	843.464	855.551
Xelaev18004223m	GBA2	34.835	4.273	3.742	3.953	3.837	3.907	3.93	3.428	3.742	4.023
Xelaev18004224m	GALT	3081.71	335.311	327.558	350.656	335.311	345.564	337.883	348.113	350.656	350.656
Xelaev18004229m	DCTN3	303.85	33.932	30.791	35.774	33.311	34.344	34.55	35.774	32.269	33.104
Xelaev18004230m	RPP25L	128.184	14.923	14.83	14.362	14.174	14.55	14.174	13.7	12.737	14.736
Xelaev18004235m	TLN1	1027.13	117.526	111.068	115.121	110.251	113.506	113.506	115.121	113.506	117.526
Xelaev18004239m	COMMD7	1064.09	116.884	114.213	119.535	111.523	113.319	118.653	119.535	127.381	123.042
Xelaev18004256m	DENND6A	291.152	31.608	29.646	32.093	30.14	34.011	33.773	34.011	32.816	33.056
Xelaev18004257m	SLMAP	221.158	26.36	23.126	25.652	23.674	23.674	24.579	24.037	24.759	25.296
Xelaev18004259m	FLNB	2923.09	331.969	305.5	329.593	317.625	329.593	329.593	329.593	320.03	329.593
Xelaev18004265m	ANKRD44	205.795	23.436	21.048	23.099	21.394	24.602	24.104	22.761	22.422	22.93
Xelaev18004373m	RPS24	34006.9	3632.21	3798.25	3632.21	3687.86	3743.21	3660.07	3715.57	3961.68	4175.82
Xelaev18004383m	PGLS	1082.87	119.291	114.537	119.291	120.076	124.735	123.19	118.505	118.505	124.735
Xelaev18004384m	COLGALT1	972.646	106.679	102.639	105.875	101.825	108.28	109.078	107.48	114.612	116.177
Xelaev18004402m	VPS11	966.827	99.122	93.249	104.885	104.068	113.74	112.944	112.147	111.347	115.325
Xelaev18004404m	HYOU1	9146.98	1010.59	949.292	1025.72	980.098	1033.26	1033.26	1025.72	1048.28	1040.78
Xelaev18004405m	TRAPPC4	362.368	39.323	37.538	39.912	39.323	42.241	41.952	40.79	40.498	40.79
Xelaev18004415m	DDX6	2106.32	248.076	202.427	230.869	227.378	237.8	234.343	244.666	239.523	241.241
Xelaev18004422m	HMBS	260.241	28.031	26.775	28.652	27.615	28.857	29.878	29.471	31.085	29.878
Xelaev18004423m	IFT46	200.963	23.651	24.037	21.01	20.331	26.189	22.476	20.194	20.467	22.608
Xelaev18004428m	CARM1	1737.76	195.943	188.793	190.23	190.23	197.362	193.093	194.52	197.362	190.23
Xelaev18004430m	TIMM29	337.087	37.115	34.778	37.575	39.623	40.967	38.718	37.575	35.485	35.25
Xelaev18004433m	LDLR	70.258	8.068	6.923	8.572	8.522	9.409	8.92	8.472	5.714	5.658
Xelaev18004436m	DOCK7	18.369	1.516	1.577	1.943	1.943	2.206	2.165	2.419	2.246	2.353
Xelaev18004444m	PRKCSH	7821.59	843.14	887.22	855.818	855.818	880.972	849.487	874.708	880.972	893.452
Xelaev18004455m	RPL37A	1302.6	162.113	130.593	133.231	153.796	148.739	153.796	151.274	130.593	138.46
Xelaev18004499m	TM9SF3	2544.86	280.587	272.656	280.587	282.559	286.491	292.358	288.45	280.587	280.587
Xelaev18004502m	PPP3CB	1232.28	133.351	130.295	141.398	135.376	140.4	146.358	138.397	133.351	133.351
Xelaev18004503m	ANXA7	3524.78	383.523	380.684	389.176	383.523	405.963	397.602	397.602	383.523	403.183
Xelaev18004504m	SORBS1	15.253	2.019	1.441	1.775	1.633	1.732	1.611	1.644	1.721	1.677
Xelaev18004505m	PDLIM1	4969.88	563.799	511.403	567.757	543.858	571.706	555.853	551.864	539.839	563.799
Xelaev18004506m	HELLS	854.063	88.101	76.389	93.769	91.657	99.33	104.792	103.435	97.949	98.64
Xelaev18004542m	CTF1	103.108	10.09	8.853	10.987	10.466	11.135	12.436	13.281	13.211	12.649
Xelaev18004555m	TRIM69	2738.49	322.837	316.412	290.111	294.565	307.755	303.386	290.111	309.929	303.386
Xelaev18004558m	PRSS8	3124.67	321.865	336.404	341.199	350.715	357.79	369.469	362.478	348.345	336.404
Xelaev18004559m	FUS	794.299	91.931	86.308	88.821	89.446	83.771	86.308	89.446	89.446	88.821
Xelaev18004586m	WFDC12	1537.46	169.883	157.204	174.416	161.852	174.416	177.791	184.477	163.007	174.416
Xelaev18004595m	PURA	3273.01	363.543	333.832	374.137	347.447	363.543	355.527	350.147	387.235	397.602
Xelaev18004597m	HNRNPAB	4941.83	542.604	461.04	557.604	515.967	550.123	557.604	612.558	542.604	601.721
Xelaev18004598m	HNRNPA0	1878.62	220.568	186.105	211.826	184.543	216.217	201.416	207.394	207.394	243.156
Xelaev18004607m	STK31	955.328	108.104	100.222	108.104	106.542	114.278	110.432	111.205	98.622	97.819
Xelaev18004667m	PLCG1	86.392	9.427	9.23	9.558	9.362	10.329	9.753	9.817	9.164	9.753
Xelaev18004668m	ZHX3	377.24	40.129	38.932	43.646	39.232	44.796	43.935	42.485	41.018	43.067
Xelaev18004697m	PBRM1	299.239	26.886	25.852	33.045	33.519	36.539	36.31	35.62	36.31	35.157
Xelaev18004698m	GNL3	647.097	97.677	87.61	87.162	76.579	69.84	59.722	59.722	55.478	53.306
Xelaev18004699m	GLT8D1	453.039	52.641	48.706	50.865	47.979	53.698	50.507	48.706	50.148	49.789
Xelaev18004708m	FANCA	144.989	14.959	14.348	16.746	15.562	16.746	16.394	17.096	16.158	16.98
Xelaev18004711m	MARVELD3	120.299	10.847	11.141	13.135	12.949	13.412	15.397	14.863	13.87	14.684
Xelaev18004715m	AP1G1	470.478	48.311	49.421	51.25	51.613	53.411	53.411	52.335	55.186	55.539
Xelaev18004719m	TTR	282.907	31.46	31.46	30.875	31.07	31.46	32.619	33.194	30.875	29.894
Xelaev18004721m	AFG3L2	853.806	93.283	92.598	95.327	91.912	97.355	94.647	96.681	94.647	97.355
Xelaev18004742m	SEC62	1158.84	130.024	125.995	125.995	129.223	130.823	128.42	125.181	135.565	127.614
Xelaev18004807m	SUCLG1	7516.91	821.704	776.034	860.827	827.339	849.724	877.372	871.871	804.702	827.339
Xelaev18004827m	FASTKD5	44.628	4.749	4.518	4.975	4.846	5.23	5.293	5.261	5.039	4.716
Xelaev18004837m	ATRN	42.956	4.701	4.701	4.962	4.73	5.162	5.105	4.933	4.376	4.286
Xelaev18004845m	SLC4A11	778.505	85.566	73.745	86.206	81.689	90.645	90.015	87.482	89.384	93.772
Xelaev18004849m	DDRGK1	346.655	40.439	37.256	37.256	39.122	41.743	39.651	39.651	35.089	36.448
Xelaev18004853m	PAIP2B	2479.72	267.651	245.24	300.723	262.549	271.03	286.033	287.68	279.406	279.406
Xelaev18004864m	NAGK	1164.8	131.194	125.594	124.653	124.653	133.963	132.12	126.533	133.043	133.043
Xelaev18004865m	EXOC6B	120.188	11.189	9.306	13.892	12.888	14.52	15.404	15.839	13.802	13.347
Xelaev18004872m	ZNF638	191.924	21.847	20.788	22.146	20.635	21.847	21.847	21.546	20.328	20.94
Xelaev18004878m	C20ORF27	118.334	12.37	11.888	12.766	12.529	13.697	14.455	13.697	13.389	13.543
Xelaev18004894m	DCTN1	2657.59	302.184	289.336	295.785	287.175	297.924	304.306	300.057	291.492	289.336
Xelaev18004896m	PCED1A	292.783	36.178	31.765	35.95	34.109	35.263	32.943	31.528	28.637	26.41
Xelaev18004903m	SMYD5	488.906	54.685	51.047	55.482	53.481	55.879	55.084	54.685	55.084	53.481
Xelaev18004904m	GLOD5	14722.5	1635.92	1612.04	1612.04	1624	1659.69	1635.92	1706.89	1635.92	1600.05
Xelaev18004905m	PRADC1	203.03	21.882	20.761	22.829	21.564	22.829	24.228	24.381	21.882	22.672
Xelaev18004907m	CCT7	25207.6	2847.26	2679.75	2867.97	2742.96	2805.7	2784.84	2784.84	2805.7	2888.63
Xelaev18004916m	RAB11FIP5	665.026	73.991	65.619	78.327	70.682	77.79	77.251	77.251	70.126	73.991
Xelaev18004917m	SMYD5	341.628	36.964	37.784	37.784	36.414	35.028	35.584	35.307	44.952	41.811
Xelaev18004918m	SFXN5	1352.2	151.498	138.149	150.4	144.874	154.774	156.946	155.861	150.4	149.301
Xelaev18004924m	SPR	7581.7	843.169	817.802	836.851	817.802	849.473	843.169	836.851	868.294	868.294
Xelaev18004984m	IGKC	835.952	93.435	87.203	89.989	89.295	96.163	93.435	92.749	96.841	96.841
Xelaev18004985m	RPIA	18071.4	2093.78	2020.09	1960.46	1915.32	1960.46	1945.45	1930.41	2064.41	2181.06
Xelaev18004990m	THNSL2	2141.19	235.148	224.252	240.538	229.719	240.538	242.327	251.211	233.343	244.111
Xelaev18004995m	EIF2AK3	78.254	6.772	6.358	7.579	7.777	9.184	9.679	9.862	9.862	11.18
Xelaev18004998m	RMND5A	60.743	6.493	6.493	6.678	6.678	6.953	6.77	6.724	7.044	6.908
Xelaev18005003m	KDM3A	832.292	91.67	78.09	95.591	90.349	97.529	96.885	97.529	91.01	93.639
Xelaev18005005m	IMMT	6311.84	726.012	665.092	700.875	675.389	721.011	695.806	721.011	685.626	721.011
Xelaev18005006m	PTCD3	2751.41	304.741	297.934	309.251	291.075	315.975	306.998	309.251	300.209	315.975
Xelaev18005007m	MRPL35	1983.7	220.303	204.598	220.303	220.303	227.998	231.049	232.569	212.505	214.074
Xelaev18005008m	POLR1A	259.53	28.987	26.142	29.845	28.122	30.271	29.203	29.417	28.556	28.987
Xelaev18005027m	TACC3	1357.71	150.54	145.091	156.986	154.848	154.848	156.986	153.775	146.186	138.454
Xelaev18005032m	LETM1	2783.23	319.346	297.095	317.146	297.095	312.73	312.73	310.514	306.064	310.514
Xelaev18005036m	NELFA	869.025	95.907	85.306	94.516	94.516	102.092	97.292	102.772	95.212	101.411
Xelaev18005054m	ADD1	290.022	43.708	29.517	34.187	31.89	27.963	29.517	28.187	28.633	36.418
Xelaev18005058m	VIM	2.672	0.305	0.239	0.287	0.287	0.341	0.277	0.316	0.321	0.3
Xelaev18005059m	NOP14	423.883	48.688	47.036	48.359	49.016	47.699	47.699	46.703	45.7	42.984
Xelaev18005061m	ITLN2	42398.4	4588.34	4553.38	4518.32	4796.17	4761.75	4796.17	4623.2	4692.65	5068.46
Xelaev18005062m	ITLN2	67093.2	7262.73	7928.75	7149.81	7598.13	7486.88	7542.57	7262.73	7318.98	7542.57
Xelaev18005064m	HTT	553.934	61.612	57.007	61.157	60.7	64.319	63.421	64.319	60.243	61.157
Xelaev18005070m	LRPAP1	5589.42	629.157	601.821	615.542	592.613	633.673	629.157	624.63	629.157	633.673
Xelaev18005076m	TRMT44	196.538	21.251	18.979	22.356	21.568	22.668	23.288	22.979	22.199	21.251
Xelaev18005077m	ACOX3	1183.31	131.804	128.918	133.716	131.804	133.716	134.669	128.918	130.844	128.918
Xelaev18005086m	GRPEL1	6036.15	677.807	648.729	668.17	638.923	672.995	668.17	643.834	711.125	706.403
Xelaev18005096m	MAN2B2	1636.06	182.248	174.06	179.533	179.533	186.297	184.951	186.297	182.248	180.892
Xelaev18005098m	WFS1	476.604	52.962	50.808	54.024	52.248	51.89	52.606	53.317	53.671	55.077
Xelaev18005114m	STX18	676.218	70.96	73.266	73.839	69.216	76.685	72.692	75.55	81.728	82.282
Xelaev18005119m	ZBTB49	7.953	0.836	0.808	0.88	0.842	0.918	1.013	1.007	0.808	0.842
Xelaev18005121m	LYAR	335.608	38.969	38.743	37.833	35.994	39.646	35.298	37.833	35.994	35.298
Xelaev18005127m	WDR1	14370.8	1629.56	1629.56	1570.46	1558.55	1606.01	1582.34	1570.46	1617.8	1606.01
Xelaev18005135m	RAB28	1250.38	143.159	126.027	141.181	136.194	143.159	145.128	144.145	135.189	136.194
Xelaev18005139m	BOD1L1	243.852	27.726	25.765	28.112	26.948	27.919	27.726	27.532	26.359	25.765
Xelaev18005150m	TAPT1	84.583	11.11	9.836	10.305	9.836	9.119	9.36	8.815	8.384	7.819
Xelaev18005153m	QDPR	13485.9	1481.27	1547.7	1436.44	1447.69	1503.52	1503.52	1492.41	1536.69	1536.69
Xelaev18005156m	LAP3	40556.6	4378.75	4781.45	4344.64	4581.59	4480.56	4480.56	4446.71	4514.32	4548
Xelaev18005164m	NCAPG	1713.88	184.633	181.848	188.782	187.402	195.623	199.686	196.981	191.529	187.402
Xelaev18005167m	PACRGL	1063.61	119.443	112.499	123.717	117.719	120.302	118.582	120.302	110.741	120.302
Xelaev18005171m	GBA3	249.846	29.491	26.632	27.595	27.786	28.358	28.358	27.977	27.211	26.438
Xelaev18005175m	DHX15	1100.08	121.764	110.701	118.111	118.111	127.182	127.182	123.578	124.482	128.973
Xelaev18005180m	SEPSECS	813.631	90.268	84.115	90.944	87.55	94.299	92.291	92.291	88.912	92.962
Xelaev18005181m	PI4K2B	546.121	62.609	59.12	64.759	61.308	65.612	62.609	63.041	54.213	52.851
Xelaev18005182m	ANAPC4	911.57	104.197	98.211	104.938	100.469	103.455	103.455	103.455	96.696	96.696
Xelaev18005187m	SMIM20	6534.07	729.777	717.285	738.046	717.285	700.461	754.451	738.046	713.097	725.624
Xelaev18005191m	TBC1D19	55.447	5.615	4.492	6.672	6.226	7.001	6.855	6.855	5.769	5.961
Xelaev18005204m	PGM2	2044.02	230.951	224.385	227.677	217.747	229.316	224.385	226.033	229.316	234.209
Xelaev18005211m	FAM114A1	3447.31	400.863	379.113	387.322	379.113	387.322	390.044	376.361	379.113	368.061
Xelaev18005214m	WDR19	71.389	7.934	7.423	7.99	7.651	8.157	8.102	8.102	7.708	8.323
Xelaev18005215m	RFC1	1424.38	141.698	138.058	155.937	158.264	165.173	166.314	168.589	166.314	164.029
Xelaev18005217m	RPL9	3065.99	331.209	333.536	347.337	340.47	338.166	326.532	347.337	342.766	358.639
Xelaev18005219m	UGDH	2936.4	327.119	307.512	322.252	314.909	336.787	329.544	339.191	331.964	327.119
Xelaev18005223m	PDS5A	18.52	1.908	1.495	1.844	1.686	1.882	2.277	2.407	2.395	2.625
Xelaev18005235m	UCHL1	22955.4	2449.28	2738.59	2467.72	2577.35	2577.35	2613.51	2504.47	2541.01	2486.12
Xelaev18005236m	LIMCH1	138.647	22.411	21.302	18.076	16.562	14.437	13.162	11.85	10.991	9.856
Xelaev18005239m	SLC30A9	775.477	83.071	79.917	89.258	84.944	89.258	89.258	88.647	84.321	86.802
Xelaev18005243m	ATP8A1	14.066	1.399	1.224	1.449	1.469	1.675	1.684	1.713	1.675	1.779
Xelaev18005247m	GNPDA2	6084.45	682.764	642.496	687.743	662.731	667.757	682.764	672.772	692.709	692.709
Xelaev18005248m	GUF1	1070.18	115.892	112.331	117.659	114.117	121.167	122.038	120.293	122.908	123.775
Xelaev18005258m	NFXL1	27.461	2.935	3.011	2.992	3.068	3.163	3.106	3.011	3.144	3.03
Xelaev18005268m	OCIAD1	1781.52	196.523	190.703	197.97	189.238	202.288	199.413	199.413	197.97	207.999
Xelaev18005270m	OCIAD2	672.189	71.377	71.907	76.092	74.01	77.126	79.179	75.574	70.314	76.61
Xelaev18005278m	SCFD2	1382.63	153.129	144.97	153.129	149.65	157.728	156.582	157.728	154.283	155.434
Xelaev18005280m	FIP1L1	142.359	15.732	14.677	16.764	15.418	16.354	16.044	16.968	14.463	15.94
Xelaev18005300m	CEP135	20.955	1.796	1.667	2.241	2.241	2.46	2.475	2.716	2.547	2.814
Xelaev18005303m	AASDH	21.266	2.448	2.048	2.354	2.179	2.526	2.572	2.385	2.354	2.401
Xelaev18005304m	PAICS	104.479	12.783	12.194	11.422	10.634	11.681	11.509	11.681	10.723	11.853
Xelaev18005305m	PAICS	9277.94	979.729	972.133	987.3	987.3	1061.8	1032.26	1024.82	1105.5	1127.1
Xelaev18005306m	PPAT	1058.16	121.882	106.955	124.315	121.068	116.971	116.147	119.434	121.068	110.324
Xelaev18005320m	VPS37A	649.464	68.705	69.213	71.234	72.237	74.228	76.2	76.69	70.731	70.226
Xelaev18005325m	MTUS1	636.93	88.37	79.394	75.819	67.979	68.51	66.914	65.843	62.597	61.504
Xelaev18005328m	PCM1	1197.07	121.526	121.526	133.507	132.523	140.321	138.386	141.284	134.487	133.507
Xelaev18005329m	GTF2E1	295.634	40.03	39.594	38.498	38.057	34.699	32.406	30.772	23.697	17.883
Xelaev18005330m	ASAH1	1417.27	155.765	148.524	159.347	152.158	161.721	158.156	158.156	160.535	162.904
Xelaev18005332m	FRG1	752.21	80.991	77.416	83.342	81.581	87.396	85.088	86.245	82.756	87.396
Xelaev18005339m	KLKB1	230.349	25.405	24.887	26.601	24.887	25.577	25.405	25.749	25.577	26.261
Xelaev18005341m	CYP4V2	181.165	18.602	17.883	19.455	19.596	21.538	20.989	21.127	21.401	20.574
Xelaev18005346m	SORBS2	44.133	5.587	4.379	5.326	4.893	5.194	4.587	4.518	4.621	5.028
Xelaev18005350m	UFSP2	2549.12	280.677	261.237	280.677	276.394	291.296	289.182	291.296	287.063	291.296
Xelaev18005353m	CFAP97	176.223	16.27	14.708	18.523	18.376	20.969	21.531	21.949	21.949	21.949
Xelaev18005359m	ACSL1	3028.01	326.846	319.322	329.34	336.782	349.056	341.71	356.346	331.827	336.782
Xelaev18005361m	CENPU	101.222	11.482	10.157	11.786	11.174	11.938	11.786	11.482	10.552	10.865
Xelaev18005371m	ENPP6	826.035	90.85	81.961	88.826	89.502	97.493	95.517	96.836	92.191	92.86
Xelaev18005377m	TRAPPC11	63.246	6.909	6.452	7.258	7.208	7.651	7.699	6.605	6.757	6.707
Xelaev18005378m	RWDD4	672.296	75.05	80.63	70.936	76.664	71.352	77.065	72.182	77.065	71.352
Xelaev18005385m	CDKN2AIP	21.431	2.141	2.005	2.39	2.373	2.406	2.771	2.341	2.566	2.438
Xelaev18005389m	DCTD	4445.96	471.314	478.693	493.333	467.609	493.333	496.969	489.688	525.732	529.288
Xelaev18005393m	AGA	1492.88	171.686	154.195	174.14	154.195	166.746	165.504	165.504	171.686	169.222
Xelaev18005394m	NEIL3	30.051	3.436	3.003	3.735	3.334	3.496	3.355	3.191	3.045	3.456
Xelaev18005396m	SPCS3	6752.64	784.847	706.63	753.871	759.061	769.409	732.995	769.409	748.669	727.746
Xelaev18005404m	CEP44	471.99	48.512	52.334	51.577	49.284	53.835	53.086	53.086	54.952	55.323
Xelaev18005411m	HMGB2	12482.1	1392.55	1352.81	1470.73	1352.81	1392.55	1392.55	1382.65	1372.73	1372.73
Xelaev18005412m	GALNT7	311.294	35.031	32.846	33.946	33.508	37.581	35.031	34.816	35.247	33.288
Xelaev18005417m	HPF1	981.517	108.998	100.261	105.852	106.642	113.654	111.335	112.883	110.558	111.335
Xelaev18005419m	NEK1	133.278	15.199	13.891	15.1	14.802	15.297	15.395	15.1	14.299	14.197
Xelaev18005422m	CBR4	821.175	88.633	87.973	91.256	87.973	95.143	94.499	89.291	94.499	91.908
Xelaev18005424m	PALLD	8.039	1.083	0.811	0.978	0.899	0.835	0.835	0.775	0.763	1.061
Xelaev18005431m	TRIM7	27.852	2.712	2.732	3.022	2.946	3.322	3.469	3.192	3.06	3.396
Xelaev18005436m	NAF1	1455.14	165.886	164.784	160.345	156.985	162.57	161.459	154.73	170.269	158.108
Xelaev18005443m	PPID	3286.6	357.56	333.157	365.567	360.236	386.631	373.514	376.15	365.567	368.222
Xelaev18005444m	ETFDH	3139.96	345.256	329.818	347.804	337.57	352.879	350.345	355.406	360.439	360.439
Xelaev18005464m	Xelaev18005464m	2439.16	279.075	250.71	273.081	260.957	273.081	271.073	271.073	275.084	285.027
Xelaev18005478m	MND1	1574.62	170.099	162.442	180.116	168.832	177.632	178.876	181.354	177.632	177.632
Xelaev18005479m	TRIM2	348.722	38.614	35.223	39.17	39.17	43.268	40	40	35.223	38.055
Xelaev18005483m	ARFIP1	1483.05	159.429	155.85	160.616	165.332	166.504	173.475	166.504	170.002	165.332
Xelaev18005493m	GATB	225.028	24.18	24.922	24.737	24.922	25.107	25.657	25.657	24.922	24.922
Xelaev18005496m	SH3D19	84.18	9.328	8.149	10.132	9.055	9.328	9.732	9.598	9.26	9.598
Xelaev18005497m	RPS3A	8136.6	899.69	893.043	879.698	886.379	932.682	906.321	919.533	906.321	912.935
Xelaev18005498m	LRBA	556.328	59.568	57.277	61.828	61.828	63.17	64.06	64.945	60.927	62.724
Xelaev18005506m	PRMT9	554.82	61.258	56.176	63.074	58.965	65.769	61.258	62.622	62.622	63.074
Xelaev18005522m	MMAA	18.783	2.055	2.003	2.132	2.08	2.042	2.182	2.246	1.924	2.119
Xelaev18005530m	ABCE1	1333.41	148.419	142.723	147.286	145.01	151.804	152.927	150.679	149.55	145.01
Xelaev18005531m	OTUD4	120.374	12.887	11.867	13.699	13.52	13.609	13.876	13.788	13.788	13.34
Xelaev18005549m	ELMOD2	1246.16	137.732	131.904	142.515	132.882	139.653	140.61	140.61	138.694	141.564
Xelaev18005551m	CLGN	225.129	27.103	21.406	25.754	24.075	26.356	25.603	24.537	24.995	25.3
Xelaev18005560m	SETD7	457.614	50.027	43.593	50.376	49.328	52.791	53.814	53.474	51.761	52.449
Xelaev18005568m	NAA15	756.409	83.607	84.748	84.178	82.459	83.033	81.304	85.316	86.448	85.316
Xelaev18005576m	MGARP	3493.63	412.281	423.602	409.437	392.244	380.659	392.244	377.746	351.222	354.198
Xelaev18005588m	SCLT1	156.825	17.781	15.575	18.497	17.54	18.378	18.259	17.419	17.055	16.32
Xelaev18005590m	PGRMC2	632.086	66.929	65.924	69.917	70.903	72.373	72.861	70.41	69.422	73.348
Xelaev18005591m	LARP1B	202.475	20.567	17.271	23.209	20.904	23.693	23.532	24.174	23.371	25.753
Xelaev18005593m	ABHD18	85.537	8.884	8.628	9.64	9.327	9.826	10.072	9.39	10.256	9.515
Xelaev18005594m	MFSD8	127.938	14.36	14.36	14.446	13.927	14.36	14.532	13.752	14.36	13.839
Xelaev18005603m	SPATA5	144.432	15.936	14.747	16.983	15.936	16.636	16.868	16.52	15.106	15.7
Xelaev18005605m	NUDT6	121.82	13.838	11.899	13.361	13.265	14.215	14.309	13.361	14.403	13.169
Xelaev18005613m	ADAD1	394.504	46.063	40.24	42.111	44.255	44.861	46.362	45.464	42.42	42.728
Xelaev18005619m	BBS7	457.141	48.848	46.126	51.904	50.001	52.659	53.411	52.282	51.145	50.765
Xelaev18005621m	EXOSC9	1782.49	208.265	185.181	204.002	192.49	208.265	198.273	205.426	186.65	193.941
Xelaev18005622m	ANXA5	14903.7	1686.5	1639.11	1627.17	1591.18	1639.11	1639.11	1603.21	1756.65	1721.71
Xelaev18005624m	HADH	29624.4	3222.95	3388.85	3246.84	3246.84	3294.43	3294.43	3222.95	3365.34	3341.76
Xelaev18005634m	SEC24B	418.476	45.722	42.293	48.073	45.383	48.405	48.073	48.073	46.734	45.722
Xelaev18005635m	MCUB	1705.65	197.898	183.282	193.955	185.973	191.309	187.313	187.313	185.973	192.634
Xelaev18005638m	FAM241A	915.221	101.122	85.684	100.404	97.515	107.517	109.623	103.267	104.69	105.399
Xelaev18005653m	CASP6	3849.93	434.813	399.939	434.813	412.734	444.16	422.243	437.936	422.243	441.052
Xelaev18005658m	ZGRF1	32.81	3.21	3.053	3.793	3.568	3.744	3.818	3.818	3.793	4.014
Xelaev18005659m	LARP7	652.548	69.569	66.872	72.231	70.638	73.811	74.335	75.38	73.811	75.9
Xelaev18005683m	C4ORF3	1098.62	117.743	110.255	122.656	118.566	121.842	128.315	125.091	121.842	132.312
Xelaev18005694m	PAPSS1	143.038	13.303	12.072	13.193	13.414	15.673	16.612	17.637	18.042	23.093
Xelaev18005697m	AIMP1	5926.95	673.548	605.768	683.035	639.969	673.548	673.548	678.298	654.433	644.803
Xelaev18005698m	TBCK	296.055	32.846	31.374	33.332	31.867	34.057	34.297	33.574	31.621	33.089
Xelaev18005701m	GSTCD	75.733	7.735	7.858	7.858	7.611	8.463	8.877	9.284	8.936	9.111
Xelaev18005702m	INTS12	102.104	10.935	8.712	11.428	10.183	12.474	12.632	11.994	11.753	11.994
Xelaev18005705m	PPA2	5626.47	631.048	737.474	613.401	631.048	608.959	608.959	591.067	608.959	595.559
Xelaev18005713m	CENPE	292.825	27.522	27.264	31.799	31.554	33.984	34.701	35.65	34.701	35.65
Xelaev18005714m	DPY19L1	91.69	9.992	9.095	10.33	9.374	10.397	10.127	10.195	10.464	11.716
Xelaev18005716m	BDH2	10221.7	1101.99	1227.54	1135.91	1118.99	1135.91	1127.46	1127.46	1135.91	1110.5
Xelaev18005720m	MANBA	692.024	75.94	74.79	77.085	76.514	78.793	77.656	78.793	75.94	76.514
Xelaev18005728m	PPP3CA	1272.94	140.247	127.983	144.252	138.23	145.247	146.239	146.239	140.247	144.252
Xelaev18005734m	LAMTOR3	231.504	26.398	24.416	24.725	26.248	26.248	25.033	25.644	26.995	25.796
Xelaev18005748m	ADH5	9170.49	1000.57	1075.47	985.367	1015.69	1015.69	1000.57	1038.24	1030.74	1008.14
Xelaev18005749m	METAP1	864.876	94.818	91.185	94.096	88.239	96.973	91.916	93.371	105.417	108.86
Xelaev18005751m	EIF4E	6841.41	748.311	759.059	732.081	732.081	775.076	753.692	769.751	790.971	780.387
Xelaev18005753m	RAP1GDS1	1539.74	171.78	164.384	173.002	163.139	176.648	173.002	171.78	171.78	174.22
Xelaev18005766m	HPGDS	5709.66	645.01	610.556	627.883	619.245	593.016	752.038	619.245	606.191	636.471
Xelaev18005767m	SMARCAD1	916.43	102.983	96.379	103.708	100.067	106.587	105.151	106.587	95.635	99.334
Xelaev18005787m	FAM13A	269.505	27.068	32.177	32.355	31.643	28.557	29.475	29.475	28.372	30.384
Xelaev18005790m	HERC3	35.375	3.646	3.473	3.889	3.744	4.127	4.431	4.385	3.792	3.889
Xelaev18005795m	RUFY3	149.907	15.471	15.592	16.897	16.071	17.478	17.593	16.897	16.897	17.013
Xelaev18005800m	PKD2	59.637	6.423	6.135	6.66	6.613	6.754	7.172	6.987	6.518	6.375
Xelaev18005809m	G3BP2	1538.88	169.406	157.049	169.406	170.627	179.103	175.485	182.699	171.845	163.262
Xelaev18005812m	USO1	593.386	66.589	60.742	66.589	63.689	67.067	66.109	65.627	66.589	70.386
Xelaev18005834m	ALB	253.433	33.616	28.019	33.804	27.221	30.567	28.416	26.011	21.41	24.369
Xelaev18005835m	ALB	462.104	64.983	42.129	51.328	56.58	60.327	52.746	50.614	45.142	38.254
Xelaev18005836m	ALB	707.044	90.476	78.623	73.598	84.081	89.421	77.516	74.724	71.897	66.708
Xelaev18005837m	ANKRD17	14.416	1.473	1.422	1.532	1.697	1.678	1.8	1.8	1.572	1.442
Xelaev18005838m	COX18	168.623	18.978	17.488	18.71	18.034	19.908	19.378	18.844	18.575	18.71
Xelaev18005847m	NAAA	43.231	4.472	4.412	4.889	4.562	5.606	5.635	4.682	4.442	4.532
Xelaev18005848m	NAAA	153.204	16.609	16.294	17.129	17.026	17.44	18.36	16.504	16.818	17.026
Xelaev18005850m	NUP54	594.048	64.604	61.108	66.084	60.604	68.041	66.575	68.041	68.528	70.463
Xelaev18005851m	SCARB2	176.437	22.526	17.619	20.606	18.63	18.199	18.487	18.199	20.188	21.983
Xelaev18005855m	STBD1	3580.15	399.48	370.855	407.914	370.855	419.057	399.48	407.914	399.48	405.11
Xelaev18005861m	2019-09-11	94.331	9.981	7.795	9.981	10.658	11.78	10.414	10.414	10.958	12.35
Xelaev18005868m	MRPL1	2721.39	303.648	277.612	310.029	295.063	316.363	303.648	312.145	290.736	312.145
Xelaev18005871m	ANXA3	22950.2	2570.78	2496.3	2607.74	2514.99	2552.23	2626.15	2570.78	2533.64	2477.57
Xelaev18005880m	PRC1	52.687	4.263	4.348	5.594	6.126	6.238	6.68	7.112	5.976	6.35
Xelaev18005883m	DCTN6	2862.91	314.249	304.814	314.249	311.899	316.592	328.219	309.544	335.126	328.219
Xelaev18005888m	GTF2E2	784.225	99.897	86.355	97.591	94.095	95.265	86.355	83.924	72.649	68.095
Xelaev18005891m	GSR	617.344	66.297	68.369	67.336	67.336	68.369	70.421	70.421	69.91	68.884
Xelaev18005894m	COPS4	6672.7	746.404	701.772	746.404	713.014	751.922	746.404	757.427	757.427	751.922
Xelaev18005895m	PRAG1	33.369	3.518	3.142	4.285	3.518	3.811	3.931	3.907	3.567	3.69
Xelaev18005899m	CENPC	100.857	10.941	9.988	11.098	11.098	11.563	11.87	11.486	11.098	11.716
Xelaev18005901m	UBA6	6974.19	773.053	731.943	784.667	749.651	790.453	784.667	778.867	796.226	784.667
Xelaev18005902m	COQ2	78.248	8.504	8.859	8.801	8.564	8.977	9.094	8.801	8.504	8.145
Xelaev18005910m	HPSE	139.64	15.115	14.33	15.336	15.115	15.557	16.212	16.103	16.536	15.336
Xelaev18005920m	HNRNPDL	3114.31	349.86	307.515	342.965	328.987	347.568	338.334	347.568	379.084	372.43
Xelaev18005922m	HNRNPD	1281.21	153.236	129.425	145.809	138.208	146.746	140.125	151.395	131.4	144.869
Xelaev18005925m	PTPN13	10.63	1.128	1.143	1.091	1.245	1.209	1.267	1.195	1.114	1.238
Xelaev18005929m	KLHL8	424.744	44.659	40.25	50.871	45.657	49.907	50.229	44.325	49.584	49.261
Xelaev18005930m	BLVRB	1220.07	128.935	121.793	134.956	129.945	141.871	139.907	139.907	139.907	142.85
Xelaev18005996m	SEC31A	89.5	10.178	8.913	11.973	9.623	9.763	9.623	9.693	9.693	10.04
Xelaev18006000m	CREB3L3	488.853	53.346	50.362	57.006	54.084	55.551	56.643	55.916	51.861	54.084
Xelaev18006010m	CTU1	386.73	42.209	42.509	43.403	41.001	43.403	43.7	43.403	43.106	43.996
Xelaev18006011m	METTL14	696.15	65.961	62.083	68.128	68.128	78.497	80.489	86.805	86.805	99.255
Xelaev18006024m	UHRF1	633.586	64.906	59.581	67.511	66.993	73.622	75.619	76.115	73.622	75.619
Xelaev18006056m	NOA1	814.372	89.202	87.125	89.891	92.631	92.631	94.67	94.67	87.819	85.732
Xelaev18006062m	HNRNPM	1735.48	191.139	175.285	195.384	191.139	198.197	196.792	198.197	192.558	196.792
Xelaev18006073m	TIMM13	8028.06	875.874	810.529	849.935	869.413	914.318	933.342	939.655	914.318	920.674
Xelaev18006082m	EEF2	24027.7	2568.39	2605.93	2680.31	2643.23	2643.23	2735.51	2698.76	2680.31	2772.04
Xelaev18006092m	APBA3	450.013	50.24	49.19	50.588	49.19	52.66	50.588	50.588	48.132	48.838
Xelaev18006094m	TJP3	89.172	8.795	8.578	9.711	9.572	10.396	10.531	10.124	10.866	10.598
Xelaev18006100m	MYDGF	5384.5	610.112	597.4	588.867	584.583	614.326	580.286	580.286	610.112	618.53
Xelaev18006101m	DPP9	726.897	82.814	74.436	80.452	78.664	83.401	81.636	82.226	80.452	82.814
Xelaev18006105m	PLIN3	2531.92	269.367	302.22	271.457	281.832	287.997	279.767	283.891	275.622	279.767
Xelaev18006106m	HDGFL2	496.576	57.034	50.136	56.284	53.629	56.659	57.779	57.034	54.393	53.629
Xelaev18006108m	CHAF1A	1185.91	151.375	141.323	125.291	123.36	133.86	132.917	128.168	125.291	124.326
Xelaev18006109m	SH3GL1	1470.91	162.456	141.974	164.668	148.922	171.237	171.237	173.405	165.77	171.237
Xelaev18006122m	DNAJA1	2114.69	222.892	209.115	231.354	229.67	247.969	246.325	238.048	249.609	239.711
Xelaev18006123m	APTX	689.173	66.612	68.754	72.433	73.985	76.538	77.549	89.255	81.041	83.006
Xelaev18006124m	KCMF1	123.49	13.227	14.492	13.227	14.224	14.135	13.502	13.41	13.227	14.045
Xelaev18006148m	POMK	219.881	24.232	20.964	24.764	23.518	24.232	25.117	24.764	24.232	28.058
Xelaev18006150m	INTS10	306.081	29.804	27.905	33.755	30.873	34.785	35.551	35.041	38.566	39.801
Xelaev18006155m	SH2D4A	118.888	13.858	10.531	13.491	12.842	14.582	13.583	14.131	12.748	13.121
Xelaev18006174m	WRN	551.007	63.31	57.347	62.405	60.123	63.761	63.761	64.211	57.813	58.277
Xelaev18006181m	DOHH	1897.9	203.838	205.396	206.95	206.95	208.501	216.194	211.589	220.765	217.721
Xelaev18006193m	MBD3	1040.58	104.384	93.66	148.167	107.866	109.935	121.402	120.074	106.478	128.609
Xelaev18006196m	AP1M1	486.747	54.863	54.002	54.29	52.259	54.002	51.672	56.284	51.966	57.408
Xelaev18006206m	ATP5ME	918.787	98.451	102.647	100.859	102.052	100.859	109.074	99.659	107.34	97.845
Xelaev18006207m	CWF19L1	1872.34	205.061	191.138	205.061	198.915	214.16	208.109	208.109	218.659	223.126
Xelaev18006210m	GNG7	262.922	35.542	24.675	31.65	31.304	28.497	29.207	25.416	27.602	29.03
Xelaev18006214m	SGTA	3844.35	432.559	384.097	429.593	420.648	447.272	435.517	438.467	423.638	432.559
Xelaev18006216m	THOP1	1441.98	162.007	149.677	160.787	154.645	165.65	159.564	162.007	160.787	166.859
Xelaev18006219m	CTDSPL2	117.715	10.505	9.304	11.857	11.667	14.965	14.788	14.877	14.61	15.142
Xelaev18006221m	REEP6	2206.84	242.013	242.013	243.815	238.396	247.405	247.405	249.193	247.405	249.193
Xelaev18006222m	C19ORF25	973.285	102.675	98.146	100.419	110.077	113.715	114.438	107.875	116.597	109.345
Xelaev18006228m	DAZAP1	591.624	66.067	58.664	67.678	66.471	67.678	65.257	65.257	66.874	67.678
Xelaev18006229m	GAMT	16239.6	1739.95	1727.4	1752.46	1789.79	1777.38	1899.9	1924.01	1851.29	1777.38
Xelaev18006231m	MUM1L1	70.119	7.731	6.964	8.104	7.405	7.945	8.523	8.367	7.784	7.296
Xelaev18006236m	CIRBP	57194.7	6100.73	6754.32	5957.54	6383.68	6242.76	6195.54	6100.73	6477.02	6982.41
Xelaev18006250m	GPX4	15082.1	1688.19	1675.88	1724.97	1651.15	1700.48	1700.48	1675.88	1638.75	1626.32
Xelaev18006255m	WDR18	264.354	33.321	30.236	29.645	27.441	29.05	28.048	28.048	26.004	32.56
Xelaev18006266m	PTBP1	1533.88	174.783	158.82	174.783	165.021	179.596	175.99	168.704	167.479	168.704
Xelaev18006269m	PALM	32.337	6.919	2.722	4.9	4.112	2.467	2.325	3.059	2.277	3.555
Xelaev18006283m	IGLL5	170.366	18.349	17.137	18.747	18.614	20.056	20.056	20.444	18.215	18.747
Xelaev18006288m	NDUFA7	6292.25	697.402	794.133	683.11	683.11	706.86	683.11	687.889	678.317	678.317
Xelaev18006296m	LONP1	2428.32	270.356	254.655	268.413	250.671	270.356	268.413	266.464	289.497	289.497
Xelaev18006303m	RANBP3	787.569	88.162	81.713	89.433	86.885	90.698	90.698	90.066	84.958	84.958
Xelaev18006306m	RFX2	82.122	7.614	7.614	8.809	9.004	9.832	10.269	10.207	9.706	9.068
Xelaev18006307m	ACSBG2	1679.65	186.251	167.203	186.251	180.884	195.511	191.563	196.821	187.584	187.584
Xelaev18006314m	ANP32B	4883.54	513.36	442.044	535.243	487.461	560.433	531.616	531.616	630.594	651.171
Xelaev18006332m	Xelaev18006332m	12001.1	1400.93	1267.5	1353.82	1248.03	1353.82	1306.11	1372.73	1353.82	1344.33
Xelaev18006342m	AP3D1	907.46	97.76	86.363	109.496	97.013	104.41	105.871	108.05	99.249	99.249
Xelaev18006353m	ANKLE1	14.658	1.683	1.398	1.683	1.461	1.683	1.752	1.693	1.703	1.603
Xelaev18006354m	LAGE3	977.439	107.587	104.459	114.526	102.885	109.914	113.761	109.14	106.027	109.14
Xelaev18006368m	LSM4	4916.97	564.12	529.492	564.12	545.366	548.513	548.513	557.903	523.076	535.869
Xelaev18006379m	IFI30	6826.24	775.925	788.071	743.068	717.949	800.125	743.068	751.348	738.91	767.776
Xelaev18006386m	FAM32A	476.947	43.719	41.895	47.623	47.274	53.74	54.071	59.579	60.528	68.517
Xelaev18006390m	TPM4	1526.29	202.992	152.912	187.615	162.433	164.781	161.255	165.95	160.073	168.279
Xelaev18006393m	TSPAN3	1116.8	119.969	116.818	128.487	125.414	120.753	130.775	129.252	127.722	117.608
Xelaev18006394m	ELAVL1	964.708	135.176	118.661	97.535	97.535	101.07	102.469	103.165	103.165	105.93
Xelaev18006400m	SAFB2	1298.92	147.179	138.696	138.696	136.968	141.267	147.179	143.815	150.506	154.614
Xelaev18006445m	MIER2	56.643	5.708	6.136	7.078	6.136	6.517	6.327	6.289	6.743	5.708
Xelaev18006459m	POLRMT	355.637	38.14	36.937	38.438	38.14	39.922	41.097	40.217	39.331	43.416
Xelaev18006472m	ISYNA1	142.386	17.136	13.2	17.46	15.487	15.71	15.821	16.263	15.376	15.932
Xelaev18006474m	FKBP8	3281.5	358.323	345.236	360.918	358.323	371.232	376.349	371.232	373.794	366.089
Xelaev18006477m	REX1BD	1191.06	128.402	130.33	134.162	128.402	136.065	134.162	139.848	128.402	131.291
Xelaev18006488m	ADH1B	5726.23	644.13	606.285	639.441	615.818	639.441	648.808	630.027	648.808	653.475
Xelaev18006491m	TDRD7	675.352	82.926	74.902	80.812	77.606	79.748	77.068	75.445	67.154	59.691
Xelaev18006494m	NCBP1	303.917	32.833	30.727	33.525	32.833	34.893	34.666	34.439	33.983	36.019
Xelaev18006502m	ANP32B	6995.43	824.293	735.268	796.832	695.185	846.044	740.934	752.223	813.346	791.303
Xelaev18006504m	ECPAS	1857.26	212.16	207.566	206.027	199.833	209.101	206.027	204.485	206.027	206.027
Xelaev18006505m	SMC2	4668.88	530.194	480.422	522.647	507.436	541.445	526.425	530.194	511.254	518.859
Xelaev18006511m	PTBP3	126.545	13.979	13.512	13.7	14.072	14.717	14.442	14.165	13.7	14.258
Xelaev18006517m	SNX30	1206.36	130.318	119.414	132.268	132.268	135.175	144.72	142.828	137.101	132.268
Xelaev18006524m	Xelaev18006524m	9169.59	1054.41	962.784	1024.17	962.784	1054.41	1001.3	985.953	1046.88	1076.9
Xelaev18006528m	TOMM5	2892.5	340.801	289.862	338.539	301.67	338.539	311.013	331.725	306.353	334.001
Xelaev18006530m	POLR1E	289.27	34.537	29.031	34.091	32.056	33.642	32.739	31.597	30.44	31.136
Xelaev18006532m	GRHPR	34009.2	3606.84	3872.76	3793.81	3820.2	3767.34	3846.52	3767.34	3714.16	3820.2
Xelaev18006533m	GRHPR	529.597	68.578	53.96	61.295	55.543	55.935	57.877	58.262	53.16	64.986
Xelaev18006543m	MELK	586.527	54.186	53.666	59.307	61.812	68.174	72.936	72.936	71.519	71.992
Xelaev18006547m	NANS	4200.85	458.579	444.765	455.14	444.765	468.839	462.008	458.579	512.377	495.801
Xelaev18006549m	CLTA	2697.17	304.678	308.088	306.385	292.622	302.967	287.395	302.967	287.395	304.678
Xelaev18006565m	MAP1S	1747.38	216.746	193.17	204.378	190.334	200.2	193.17	191.754	173.005	184.619
Xelaev18006575m	SLC5A5	264.544	27.741	27.531	29.195	28.575	31.032	30.424	29.811	30.016	30.22
Xelaev18006576m	CCDC124	2946.68	345.327	293.268	322.042	324.398	343.024	326.747	338.402	322.042	331.427
Xelaev18006581m	BABAM1	1054.86	119.312	110.255	118.5	111.091	123.339	118.5	117.686	116.051	120.122
Xelaev18006584m	USE1	955.026	108.092	101.914	109.618	102.693	110.378	103.47	108.856	101.914	108.092
Xelaev18006588m	CPAMD8	65.497	6.851	6.631	6.961	6.961	7.82	7.501	7.555	7.608	7.608
Xelaev18006589m	HAUS8	1112.78	128.696	114.162	133.128	121.499	130.474	127.803	128.696	113.235	115.088
Xelaev18006592m	ARL9	511.099	58.431	56.883	55.318	56.883	58.045	55.318	56.493	59.199	54.529
Xelaev18006599m	HOOK3	21.599	2.524	2.139	2.495	2.244	2.596	2.334	2.495	2.304	2.466
Xelaev18006605m	DDA1	971.417	94.692	92.283	104.127	109.498	111.015	117.017	117.76	109.498	115.527
Xelaev18006612m	EXOSC3	682.988	74.926	71.563	74.37	70.997	76.588	77.689	75.482	80.957	80.416
Xelaev18006614m	GATAD2A	796.785	86.582	80.081	90.402	85.295	94.789	91.663	93.543	85.295	89.135
Xelaev18006617m	SUGP1	280.97	31.888	30.271	32.574	30.503	33.028	31.198	31.198	30.037	30.271
Xelaev18006627m	TMEM161A	251.349	27.378	25.34	28.38	27.78	28.18	30.352	28.38	27.98	27.579
Xelaev18006628m	SLC25A42	152.247	16.561	15.681	17.303	16.436	16.809	17.548	17.18	17.303	17.426
Xelaev18006629m	ARMC6	1201.62	133	131.086	134.904	132.044	136.798	135.852	139.621	127.225	131.086
Xelaev18006630m	SUGP2	402.595	44.594	43.316	44.911	43.957	44.594	44.594	45.859	44.911	45.859
Xelaev18006631m	MIC13	5033.05	560.377	489.588	527.492	493.851	572.529	531.642	535.781	674.31	647.483
Xelaev18006638m	NCLN	1192.64	130.809	122.925	134.691	117.91	133.724	123.92	131.783	144.235	152.646
Xelaev18006642m	TLE1	258.281	28.287	25.43	30.275	26.87	29.881	28.888	28.888	29.683	30.078
Xelaev18006663m	COPE	7570.65	838.051	743.017	838.051	825.586	887.334	887.334	868.958	838.051	844.261
Xelaev18006667m	EPS15L1	152.275	14.902	12.866	16.959	16.003	17.664	18.013	18.588	17.897	19.384
Xelaev18006673m	CHERP	397.085	42.481	39.791	44.524	44.524	45.1	46.811	45.1	43.653	45.1
Xelaev18006675m	MED26	61.527	6.576	5.983	7.011	6.528	7.483	6.915	7.201	6.867	6.963
Xelaev18006682m	NDUFB6	8721.61	955.83	955.83	969.902	941.685	976.911	983.902	962.875	1004.77	969.902
Xelaev18006685m	PTGR1	30151	3350.21	3275.11	3300.21	3325.24	3424.75	3375.12	3375.12	3325.24	3399.97
Xelaev18006686m	PTGR1	1510.76	164.213	155.52	170.329	164.213	169.112	172.755	173.964	170.329	170.329
Xelaev18006687m	PTGR1	119.84	13.172	11.811	13.704	12.993	13.35	13.704	13.35	14.143	13.616
Xelaev18006702m	TXN	12329	1319.38	1246.85	1400.65	1329.63	1360.22	1430.72	1360.22	1450.65	1430.72
Xelaev18006711m	ACO1	1146.96	131.699	118.564	133.538	123.31	132.62	127.994	127.994	120.47	130.776
Xelaev18006717m	SH3GL2	611.578	63.421	62.926	67.819	65.877	68.301	69.263	70.696	69.742	73.534
Xelaev18006721m	HAUS6	145.826	16.789	15.108	15.352	15.352	17.492	16.434	16.671	16.076	16.552
Xelaev18006722m	DENND4C	222.245	24.942	22.739	24.942	24.761	25.841	25.662	25.482	23.481	24.397
Xelaev18006725m	PLIN2	40963.7	4416.33	4744.09	4482.58	4711.7	4515.57	4548.47	4614.01	4349.71	4581.28
Xelaev18006727m	RPS6	6337.65	719.517	655.047	701.388	673.766	737.43	687.643	728.5	701.388	732.971
Xelaev18006732m	FOCAD	952.219	105.462	102.304	105.462	104.675	108.589	108.589	109.366	104.675	103.097
Xelaev18006738m	NIPSNAP3A	3510.63	386.148	366.239	427.689	369.106	383.326	383.326	402.938	386.148	405.713
Xelaev18006741m	SLC44A1	248.167	28.046	25.835	26.847	25.835	27.048	28.046	29.231	28.046	29.231
Xelaev18006746m	ZNF462	25.503	2.686	2.647	2.55	2.43	2.876	2.876	2.988	3.135	3.314
Xelaev18006748m	RAD23B	7622.05	870.245	899.786	858.326	828.261	846.347	828.261	834.306	828.261	828.261
Xelaev18006752m	MTAP	12405	1368.14	1357.88	1368.14	1347.6	1398.77	1388.58	1378.38	1408.92	1388.58
Xelaev18006765m	PLAA	1765.41	193.93	180.688	195.383	195.383	202.593	201.158	198.277	199.719	198.277
Xelaev18006769m	REXO1	130.826	18.079	15.342	17.409	16.534	16.337	14.632	12.103	10.657	9.734
Xelaev18006771m	C9ORF72	448.285	48.925	41.784	51.003	47.876	50.659	52.033	54.747	47.524	53.734
Xelaev18006797m	TTC39B	2564.71	283.571	270.517	283.571	281.409	298.56	294.303	294.303	281.409	277.069
Xelaev18006806m	TYRP1	13488	1365.07	1469.91	1446.82	1504.36	1583.82	1583.82	1617.51	1469.91	1446.82
Xelaev18006819m	FXN	2271.04	252.8	232.776	240.127	252.8	263.48	261.711	254.591	256.378	256.378
Xelaev18006821m	ERMP1	2095.57	229.352	220.471	227.584	231.115	236.379	245.074	239.869	236.379	229.352
Xelaev18006822m	RIC1	189.341	20.77	17.694	22.109	19.71	21.368	21.517	21.219	22.403	22.55
Xelaev18006825m	PLGRKT	5178.44	577	524.636	564.048	551.006	572.693	611.12	581.298	581.298	615.344
Xelaev18006826m	RLN3	208.582	53.242	13.227	36.646	19.264	15.689	13.421	13.421	14.38	29.292
Xelaev18006829m	RCL1	400.738	43.308	41.991	43.308	39.992	46.23	42.322	41.328	52.846	49.413
Xelaev18006831m	CDC37L1	829.596	94.66	83.448	94.66	90.099	98.512	95.305	92.714	90.099	90.099
Xelaev18006841m	PUM3	203.961	24.729	23.04	23.04	20.821	22.099	21.941	20.821	24.273	23.195
Xelaev18006844m	VLDLR	761.214	91.082	86.976	94.55	91.663	96.268	88.743	84.002	65.938	61.992
Xelaev18006851m	KANK1	66.328	5.742	4.971	5.842	6.185	7.447	8.024	8.458	9.628	10.032
Xelaev18006854m	CBWD2	3025.08	344.254	329.597	339.393	324.66	339.393	334.507	339.393	341.827	332.055
Xelaev18006871m	TJP2	650.652	71.826	64.274	73.865	70.591	71.826	72.236	75.077	75.077	75.88
Xelaev18006873m	TJP2	386.359	45.371	40.962	44.213	43.043	45.083	43.63	43.337	40.36	40.36
Xelaev18006885m	TMEM2	416.988	46.077	43.304	47.785	43.653	48.125	48.463	48.463	46.42	44.697
Xelaev18006886m	ABHD17B	221.46	24.867	23.893	24.705	23.402	27.723	23.73	23.73	24.381	25.028
Xelaev18006895m	ANXA1	5165.53	567.393	579.196	571.339	563.436	575.273	579.196	579.196	583.108	567.393
Xelaev18006896m	ANXA1	548.524	65.914	56.034	60.826	59.532	59.098	61.255	60.395	60.395	65.075
Xelaev18006900m	C9ORF40	429.748	47.534	45.794	48.913	44.388	47.88	47.188	47.188	52.983	47.88
Xelaev18006903m	OSTF1	384.872	40.752	41.769	41.516	43.768	43.024	44.994	41.516	43.272	44.26
Xelaev18006910m	GCNT1	74.654	8.415	8.058	7.8	8.466	8.869	8.517	8.263	7.903	8.365
Xelaev18006916m	VPS13A	297.207	33	32.015	33	32.509	34.46	33.976	34.218	32.015	32.015
Xelaev18006921m	PSAT1	8550.26	946.283	897.443	960.075	946.283	973.796	966.944	966.944	932.421	960.075
Xelaev18006927m	C15ORF40	205.675	20.895	21.185	23.886	21.618	24.996	24.304	25.271	22.191	21.33
Xelaev18006928m	UBQLN1	5.225	0.599	0.603	0.587	0.595	0.571	0.587	0.558	0.537	0.587
Xelaev18006929m	IDNK	211.215	22.853	22.07	22.853	22.541	23.782	24.851	24.089	23.935	24.242
Xelaev18006931m	HNRNPK	1130.53	124.665	115.361	126.497	120.044	125.582	119.112	126.497	131.039	141.727
Xelaev18006932m	RMI1	87.393	8.966	8.346	8.898	9.506	11.073	10.233	9.905	10.429	10.036
Xelaev18006937m	NAA35	253.872	27.969	25.081	28.777	27.358	29.578	28.978	28.576	28.978	28.576
Xelaev18006943m	ISCA1	2103.47	224.725	212.621	234.921	224.725	241.633	241.633	238.285	241.633	243.301
Xelaev18006949m	CTSL	1363.95	97.144	88.092	121.413	133.977	173.351	180.404	188.337	177.395	203.833
Xelaev18006950m	FBP2	4998.9	563.023	542.094	558.857	508.07	563.023	533.652	550.495	579.591	600.097
Xelaev18006959m	HSD17B3	24.796	5.612	2.551	4.2	2.877	1.743	1.63	1.668	1.415	3.099
Xelaev18006966m	HABP4	27115.2	2995.85	2973.87	2995.85	3039.62	3017.76	3061.42	3083.16	2951.84	2995.85
Xelaev18006978m	SASS6	1147.24	127.177	119.505	128.125	121.437	130.957	132.834	130.957	129.071	127.177
Xelaev18006990m	SEMA4D	51.874	5.059	4.486	4.946	5.32	6.329	6.539	6.469	6.434	6.294
Xelaev18007000m	AUH	342.628	36.724	34.847	37.253	35.656	37.779	38.041	38.302	41.635	42.389
Xelaev18007003m	SPTLC1	977.278	105.862	105.087	108.938	106.634	109.702	112.739	112.739	107.404	108.172
Xelaev18007005m	RABGGTA	2032.54	228.405	220.166	223.474	218.506	231.673	231.673	223.474	228.405	226.766
Xelaev18007010m	TM9SF1	244.48	26.012	22.459	27.893	26.185	30.057	28.229	29.397	26.185	28.061
Xelaev18007012m	IPO4	1400.24	154.422	150.903	155.589	152.079	157.914	157.914	155.589	157.914	157.914
Xelaev18007018m	PSME2	4138.82	463.54	447.086	450.392	450.392	460.264	473.326	453.69	466.809	473.326
Xelaev18007019m	EMC9	236.338	26.189	23.551	26.744	24.503	28.387	26.559	26.003	26.559	27.843
Xelaev18007020m	PSME1	5421.09	630.19	596.22	596.22	583.295	604.779	613.293	613.293	583.295	600.505
Xelaev18007022m	DCAF11	183.996	19.815	19.208	19.512	20.268	21.9	21.311	21.753	19.512	20.717
Xelaev18007023m	PCK2	2596.02	294.718	276.567	292.723	274.522	292.723	286.707	290.723	284.69	302.646
Xelaev18007032m	PABPN1	609.79	66.066	62.899	61.06	68.732	73.946	70.487	66.959	67.848	71.792
Xelaev18007038m	NGDN	242.041	25.419	24.541	26.286	29.494	30.318	26.973	26.458	25.069	27.484
Xelaev18007044m	DHRS4	2229.17	242.967	239.235	248.532	237.362	250.378	254.057	248.532	252.219	255.89
Xelaev18007055m	PRMT5	5669.16	633.097	604.996	623.777	600.271	646.993	623.777	628.443	651.602	656.201
Xelaev18007056m	HAUS4	1008.05	108.729	115.278	113.652	110.378	114.466	114.466	114.466	110.378	106.24
Xelaev18007059m	PSMB5	28683.4	3160.56	3280.04	3184.57	3112.39	3208.52	3280.04	3160.56	3208.52	3088.22
Xelaev18007064m	ACIN1	224.889	25.677	19.933	25.819	22.742	21.671	23.493	23.937	28.591	33.026
Xelaev18007066m	C14ORF119	307.104	33.583	31.524	33.129	32.445	35.376	36.482	35.376	34.034	35.154
Xelaev18007070m	OXA1L	2359.19	275.497	251.015	262.413	247.176	269.917	273.642	271.781	256.736	251.015
Xelaev18007073m	IGHG4	2034.51	234.573	224.585	229.597	224.585	232.918	222.907	224.585	219.537	221.224
Xelaev18007075m	IGHM	102.439	11.999	10.35	10.883	10.197	12.292	12.726	11.926	10.807	11.259
Xelaev18007079m	IGHM	412.027	44.19	43.511	44.19	45.202	48.196	47.205	49.834	42.828	46.873
Xelaev18007083m	IGHV4-59	212.452	22.417	20.341	23.576	22.563	26.262	25.564	24.149	23.288	24.292
Xelaev18007211m	DAD1	1986.05	221.78	213.755	223.375	205.638	234.445	223.375	223.375	213.755	226.554
Xelaev18007305m	METTL3	570.154	59.725	53.183	61.09	60.182	66.43	63.337	65.991	69.466	70.751
Xelaev18007306m	TOX4	522.613	60.244	49.125	58.236	59.443	60.643	60.244	61.041	56.615	57.021
Xelaev18007307m	RAB2B	902.575	99.745	93.288	97.823	99.745	104.805	105.431	104.177	100.382	97.18
Xelaev18007308m	CHD8	196.207	21.79	19.984	23.075	21.952	22.916	22.596	22.275	21.139	20.481
Xelaev18007309m	SUPT16H	305.385	32.654	27.81	33.822	31.946	35.885	37.904	36.338	33.822	35.203
Xelaev18007329m	CYLD	29.175	3.248	3.132	3.248	3.015	3.085	3.385	3.407	3.385	3.271
Xelaev18007331m	PNP	377.973	77.686	30.749	50.339	44.398	29.126	27.8	28.797	27.128	61.949
Xelaev18007338m	DNAJA1	1604.8	164.963	171.364	176.416	181.41	186.351	187.577	176.416	183.887	176.416
Xelaev18007341m	TTC5	918.034	100.288	93.46	104.757	97.273	106.233	104.757	107.703	100.288	103.274
Xelaev18007345m	EMC4	1552.47	173.091	175.603	165.482	169.3	185.54	165.482	173.091	168.031	176.855
Xelaev18007346m	METTL17	1202.8	133.112	132.14	133.112	131.165	136.976	136.976	136.014	133.112	130.187
Xelaev18007350m	OSGEP	2217.06	242.739	237.27	249.967	237.27	253.555	248.166	251.763	248.166	248.166
Xelaev18007351m	APEX1	1712.08	191.032	178.392	193.799	184.048	196.553	188.25	191.032	192.417	196.553
Xelaev18007377m	TEP1	239.086	30.196	30.196	28.924	26.883	26.695	25.171	24.202	24.397	22.421
Xelaev18007378m	HNRNPC	975.83	103.236	94.713	105.514	95.5	112.978	107.773	115.912	110.015	130.189
Xelaev18007381m	NDRG2	170.086	20.017	19.081	17.969	18.129	19.238	17.969	17.969	19.081	20.632
Xelaev18007387m	SMTN	115.832	11.714	8.919	11.616	11.317	11.813	13.349	14.64	15.359	17.104
Xelaev18007393m	POLE	835.987	90.721	87.891	92.125	90.721	96.986	96.296	96.296	92.825	92.125
Xelaev18007395m	PXMP2	827.152	93.119	89.716	88.344	90.4	95.142	93.795	90.4	93.795	92.441
Xelaev18007396m	PES1	334.255	44	40.354	42.192	39.112	37.854	34.856	32.654	33.762	29.472
Xelaev18007399m	ZP3	417.198	41.666	37.986	50.773	47.687	54.13	45.241	43.108	56.767	39.84
Xelaev18007400m	MTFP1	3024.98	337.802	330.275	330.275	325.228	327.755	342.793	340.3	347.761	342.793
Xelaev18007403m	SF3A1	1883.41	212.031	193.444	210.503	205.898	218.105	216.592	216.592	207.437	202.809
Xelaev18007404m	TBC1D10A	289.232	31.757	29.647	33.367	31.989	33.595	32.45	32.45	32.22	31.757
Xelaev18007405m	CASTOR1	171.807	18.156	17.213	18.556	18.29	19.478	20.774	20.388	18.953	20
Xelaev18007410m	ACADVL	2039.18	210.948	198.567	224.817	216.182	240.099	238.417	229.947	240.099	240.099
Xelaev18007411m	MTMR3	20.176	2.215	2.175	2.242	2.215	2.282	2.335	2.309	2.202	2.202
Xelaev18007419m	THOC5	451.473	49.828	43.069	54.532	47.609	52.378	52.016	50.56	49.828	51.653
Xelaev18007420m	AP1B1	1821.36	182.113	185.237	199.103	196.047	209.685	214.17	205.17	215.659	214.17
Xelaev18007424m	EWSR1	1951.48	198.211	187.139	204.422	196.645	212.076	227.049	225.571	250.183	250.183
Xelaev18007432m	DDX54	174.751	25.577	21.36	20.807	19.682	19.682	17.458	16.852	16.974	16.36
Xelaev18007442m	RBM19	206.718	22.512	18.86	22.512	23.781	23.781	24.561	23.938	23.15	23.624
Xelaev18007449m	PLBD2	8449.96	949.937	893.412	949.937	893.412	949.937	928.868	928.868	970.858	984.727
Xelaev18007454m	SART3	1015.13	117.593	107.134	113.615	110.393	113.615	116.802	116.008	109.581	110.393
Xelaev18007455m	UNG	1960.6	235.939	208.743	221.678	205.468	231.218	218.468	224.873	205.468	208.743
Xelaev18007456m	USP30	93.903	9.94	9.12	10.086	9.866	11.521	11.38	11.239	9.94	10.811
Xelaev18007458m	DAO	2937.14	326.361	316.714	323.958	321.55	328.757	333.532	328.757	331.148	326.361
Xelaev18007460m	SSH1	79.595	10.727	9.6	10.257	9.236	9.419	8.556	8.242	6.745	6.812
Xelaev18007461m	CORO1C	1622.57	183.2	178.205	181.956	175.686	184.44	181.956	179.459	178.205	179.459
Xelaev18007465m	ISCU	2428.3	275.045	250.631	280.563	260.123	282.394	273.197	280.563	254.444	271.344
Xelaev18007467m	ACACB	108.989	11.38	10.533	12.026	11.658	12.751	12.93	12.751	12.299	12.661
Xelaev18007472m	ALDH3B1	324.446	51.959	50.345	42.492	37.243	34.134	31.202	28.457	25.334	23.28
Xelaev18007473m	MMAB	8670.9	954.774	940.343	990.569	933.102	990.569	969.139	983.442	911.279	997.682
Xelaev18007474m	MVK	1997.73	222.545	214.299	222.545	209.302	227.446	227.446	227.446	219.258	227.446
Xelaev18007480m	GLTP	1080.28	113.158	111.449	118.225	115.703	123.209	124.852	128.925	124.032	120.727
Xelaev18007483m	GIT2	284.066	22.782	24.934	27.23	28.567	33.245	35.073	34.671	37.056	40.508
Xelaev18007484m	ANKRD13A	125.022	13.748	14.121	13.748	13.372	14.489	14.121	14.121	13.181	14.121
Xelaev18007490m	KIAA1671	152.381	15.632	15.103	16.869	17.071	18.258	18.16	17.57	16.05	17.669
Xelaev18007501m	HPS4	37.289	3.917	3.296	4.258	4.425	4.37	4.536	4.481	3.917	4.089
Xelaev18007502m	SRRD	187.664	20.266	19.047	21.066	20.266	21.462	22.506	22.117	20.4	20.534
Xelaev18007507m	RDH11	744.96	86.199	78.786	86.199	80.036	85.589	84.365	85.589	78.159	80.036
Xelaev18007525m	PITPNB	2301.05	251.952	244.803	257.26	253.726	264.271	255.496	259.02	257.26	257.26
Xelaev18007530m	CHEK2	222.991	24.725	23.901	24.561	24.066	25.538	25.538	24.725	24.561	25.376
Xelaev18007531m	CHEK2	1185.74	136.109	126.509	135.16	126.509	136.109	132.298	133.254	128.448	131.339
Xelaev18007532m	HSCB	507.618	55.965	50.573	57.467	54.828	60.057	57.84	58.212	55.208	57.467
Xelaev18007536m	PRODH	1470.71	160.76	154.699	165.553	161.963	169.116	166.743	165.553	164.359	161.963
Xelaev18007542m	PRKAB1	108.235	12.598	13.127	12.731	11.923	11.991	12.128	12.06	10.874	10.803
Xelaev18007543m	CIT	174.396	20.731	18.573	19.59	18.28	20.02	19.011	19.59	19.011	19.59
Xelaev18007545m	RAB35	300.308	33.089	33.936	32.448	33.514	32.017	34.982	32.876	34.356	33.089
Xelaev18007546m	GCN1	1625.13	179.975	178.616	178.616	177.254	184.031	185.377	182.682	181.33	177.254
Xelaev18007547m	RPLP0	661.5	72.895	68.239	72.895	71.356	71.87	75.94	73.915	76.945	77.445
Xelaev18007555m	COX6A1	17749.9	1896.11	1838.81	1896.11	2146.29	2008.77	2091.7	1994.82	1952.75	1924.51
Xelaev18007557m	GATC	330.071	35.839	32.865	35.571	34.226	40.294	36.637	37.429	37.692	39.519
Xelaev18007558m	SRSF9	553.552	59.02	59.02	63.863	58.574	59.91	59.02	61.236	65.596	67.314
Xelaev18007559m	DYNLL1	4408.84	505.942	498.145	471.705	513.681	474.381	505.942	487.654	482.366	469.021
Xelaev18007560m	COQ5	2132.88	236.03	234.28	237.774	227.239	241.252	236.03	237.774	241.252	241.252
Xelaev18007561m	RNF10	156.11	16.706	16.579	15.937	16.579	17.84	18.828	18.212	17.964	17.465
Xelaev18007565m	MLEC	1277.11	146.924	136.032	142.435	135.105	145.137	138.794	145.137	140.62	146.924
Xelaev18007567m	UNC119B	76.689	8.055	8.055	8.584	7.995	8.874	9.388	9.274	8.232	8.232
Xelaev18007570m	ACADS	14213.3	1562.38	1514.87	1562.38	1526.8	1632.75	1597.69	1609.41	1585.95	1621.09
Xelaev18007576m	LIMK2	201.827	22.862	18.652	22.254	22.559	23.013	23.465	24.064	23.315	21.641
Xelaev18007579m	DRG1	3532.43	405.207	379.373	396.66	382.272	399.516	390.927	385.165	399.516	393.797
Xelaev18007581m	EIF4ENIF1	671.466	106.81	77.432	67.267	61.412	71.273	68.419	68.992	75.21	74.652
Xelaev18007583m	SFI1	14.491	1.488	1.589	1.578	1.266	1.499	1.711	1.689	1.851	1.819
Xelaev18007584m	PISD	3384.71	374.006	348.875	374.006	365.694	390.444	390.444	374.006	387.721	379.512
Xelaev18007586m	PRR14L	29.202	1.745	1.745	2.544	2.703	3.359	3.552	3.881	4.773	4.901
Xelaev18007587m	DEPDC5	50.914	4.948	5.025	5.402	5.513	5.914	6.41	5.733	6.128	5.842
Xelaev18007590m	RSPH14	174.561	19.373	18	19.101	19.644	20.048	20.716	20.716	18.964	18
Xelaev18007598m	SNRPD3	2442.19	260.819	259.197	264.047	260.819	267.256	275.198	267.256	289.216	298.379
Xelaev18007603m	SMPD4	1404.88	139.376	129.444	156.261	151.496	164.496	167.987	164.496	164.496	166.825
Xelaev18007606m	MED15	251.069	27.944	23.117	28.916	26.763	30.261	30.261	29.302	26.366	28.139
Xelaev18007607m	SIRT4	283.082	31.768	30.837	33.378	29.66	30.837	30.837	31.304	32.231	32.231
Xelaev18007611m	CRKL	162.961	17.144	11.65	15.975	14.9	16.679	20.849	21.067	23.632	21.067
Xelaev18007614m	CABIN1	134.589	14.581	13.663	15.034	14.353	15.705	15.927	15.146	15.146	15.034
Xelaev18007617m	DDT	89.996	8.84	9.712	10.302	10.237	10.302	9.976	10.561	9.313	10.753
Xelaev18007619m	GSTT1	30530.5	3433.75	4252.85	3383.5	3282.21	3256.72	3128.16	3179.8	3179.8	3433.75
Xelaev18007621m	GSTT1	68.582	15.167	5.014	10.084	7.524	6.018	5.423	4.542	5.271	9.539
Xelaev18007623m	DDX51	132.672	13.542	12.832	15.206	14.628	15.586	16.428	15.396	14.04	15.014
Xelaev18007633m	IGLV5-37	591.568	65.892	60.941	65.447	63.207	67.223	66.337	65.447	66.78	70.295
Xelaev18007662m	IGLV3-21	211.242	22.2	23.126	24.04	23.737	25.986	24.493	21.105	22.819	23.737
Xelaev18007665m	IGLC7	253.116	27.782	26.251	27.95	27.277	30.407	27.277	29.273	28.45	28.45
Xelaev18007671m	ESS2	32.451	3.325	2.972	3.394	3.232	3.622	3.645	3.44	4.41	4.41
Xelaev18007675m	SLC25A1	140.707	22.898	12.34	18.232	15.894	13.187	13.187	13.396	12.978	18.595
Xelaev18007676m	CLTCL1	358.958	39.569	36.623	40.438	39.278	41.301	41.014	40.727	40.149	39.859
Xelaev18007677m	SNAP29	696.467	76.282	74.233	83.273	74.748	78.307	79.311	79.311	73.2	77.803
Xelaev18007679m	SERPIND1	120.653	13.536	12.665	12.665	11.975	13.823	13.344	13.344	13.151	16.149
Xelaev18007681m	HIC2	105.351	9.39	10.923	12.29	12.29	12.224	13.396	12.09	11.753	10.994
Xelaev18007683m	YDJC	699.663	75.057	69.535	77.771	77.771	81.523	77.231	84.696	78.849	77.231
Xelaev18007684m	SDF2L1	1784.38	182.107	182.107	189.417	198.063	209.395	213.591	213.591	200.917	195.196
Xelaev18007688m	TOP3B	350.99	39.706	37.387	38.842	37.971	39.993	39.706	39.419	38.262	39.706
Xelaev18007694m	UFD1	620.465	73.827	68.179	64.302	63.318	72.899	68.179	69.609	68.657	71.496
Xelaev18007695m	CDC45	277.278	26.747	25.335	28.824	29.732	31.968	33.723	33.94	33.287	33.723
Xelaev18007703m	GNB1L	168.799	17.144	17.005	18.913	18.913	20.503	19.181	19.314	18.644	19.181
Xelaev18007708m	ARVCF	146.056	16.053	14.358	16.274	15.942	15.719	16.93	16.494	16.494	17.792
Xelaev18007709m	TANGO2	634.59	71.56	64.777	69.496	67.935	75.127	73.096	71.046	68.457	73.096
Xelaev18007710m	DGCR8	681.706	77.918	74.009	77.364	74.571	79.024	77.364	75.133	74.009	72.314
Xelaev18007711m	DGCR8	243.767	28.431	25.002	27.68	25.776	28.431	26.733	26.923	28.056	26.733
Xelaev18007712m	TRMT2A	240.55	26.507	23.466	27.204	26.156	27.204	28.58	27.723	27.378	26.332
Xelaev18007714m	RANBP1	5543.28	595.82	595.82	604.53	595.82	630.364	617.501	604.53	655.78	643.122
Xelaev18007716m	PGAM5	942.295	102.364	97.579	102.364	98.381	108.641	107.862	103.944	110.966	110.192
Xelaev18007717m	ANKLE2	247.236	27.457	24.889	24.889	24.687	28.803	30.314	29.562	27.262	29.373
Xelaev18007718m	GOLGA3	177.831	19.947	17.247	19.947	19.06	20.24	20.822	20.967	19.8	19.8
Xelaev18007720m	CHFR	101.878	11.835	10.023	11.48	11.05	12.186	12.186	12.186	10.393	10.54
Xelaev18007733m	EP400	81.945	8.938	8.327	9.602	8.871	9.602	9.733	9.471	8.938	8.464
Xelaev18007736m	SFSWAP	58.722	6.792	6.11	6.882	6.567	6.882	6.476	6.612	5.97	6.431
Xelaev18007743m	STX2	160.553	18.179	15.779	19.283	17.432	18.549	17.557	18.549	16.675	18.549
Xelaev18007746m	PIWIL1	40.061	4.724	4.05	4.391	4.452	4.634	4.513	4.483	4.361	4.452
Xelaev18007751m	GLT1D1	19.161	1.872	1.757	1.986	1.886	2.124	2.138	2.152	2.591	2.655
Xelaev18007752m	SLC15A4	556.019	56.384	53.684	67.885	59.796	62.777	64.616	66.076	60.919	63.882
Xelaev18007760m	DHX37	261.08	30.439	28.362	30.028	29.407	29.614	29.199	28.572	27.729	27.729
Xelaev18007762m	SCARB1	273.965	30.409	27.919	32.639	29.586	33.239	31.226	31.226	28.965	28.757
Xelaev18007770m	DNAH10	90.454	9.437	8.412	9.975	9.592	10.803	11.025	10.579	10.127	10.504
Xelaev18007772m	ATP6V0A2	1357.4	143.656	128.872	154.712	141.413	156.893	162.306	155.804	152.521	161.228
Xelaev18007775m	GTF2H3	152.384	14.297	13.947	15.327	15.776	17.959	18.805	18.489	17.53	20.254
Xelaev18007776m	EIF2B1	4583.86	501.018	485.824	516.063	489.637	538.37	508.559	516.063	504.793	523.533
Xelaev18007782m	RILPL2	182.517	21.242	21.532	20.072	18.731	20.513	20.072	19.181	20.367	20.806
Xelaev18007784m	SBNO1	134.252	15.503	14.146	16.036	13.869	15.77	15.145	15.77	13.592	14.42
Xelaev18007785m	CDK2AP1	910.295	97.392	82.736	100.782	99.43	108.785	106.801	109.443	101.456	103.47
Xelaev18007789m	ARL6IP4	81.756	9.22	8.436	8.741	8.68	8.982	9.455	8.922	9.572	9.747
Xelaev18007793m	VPS37B	2029.73	226.605	225.005	215.321	225.005	228.201	229.794	229.794	226.605	223.4
Xelaev18007794m	HIP1R	489.806	52.111	46.804	55.679	53.309	55.679	58.016	56.462	54.893	56.852
Xelaev18007798m	DENR	10820.8	1248.06	1092.39	1256.51	1162.48	1239.6	1214.08	1239.6	1171.13	1196.97
Xelaev18007801m	KNTC1	750.584	81.931	78.733	83.199	81.931	86.343	86.343	86.343	83.831	81.931
Xelaev18007802m	RSRC2	83.096	8.851	7.67	9.481	8.909	9.424	9.424	9.254	10.319	9.763
Xelaev18007805m	CLIP1	387.451	42.483	40.294	43.409	43.409	44.936	46.144	44.936	41.862	39.978
Xelaev18007808m	VPS33A	116.521	11.913	11.913	12.287	13.297	13.836	13.477	13.115	13.297	13.387
Xelaev18007809m	DIABLO	1147.33	124.513	114.057	128.244	125.449	132.858	131.019	133.775	128.244	129.171
Xelaev18007814m	MLXIP	18.902	2.071	1.8	2.222	2	2.195	2.168	2.277	2.085	2.085
Xelaev18007817m	PSMD9	3090.67	343.744	316.17	351.124	336.305	346.21	351.124	351.124	343.744	351.124
Xelaev18007823m	TMEM120B	1053.13	112.132	114.507	113.718	118.42	119.971	122.282	121.513	115.294	115.294
Xelaev18007828m	RNF34	285.506	27.822	32.99	30.907	31.141	32.3	32.3	32.069	33.676	32.3
Xelaev18007829m	ANAPC5	478.191	55.635	50.881	54.459	51.682	56.026	53.274	52.878	50.479	52.878
Xelaev18007833m	P2RX4	1259.17	139.159	128.904	138.146	134.067	145.184	141.178	147.172	141.178	144.186
Xelaev18007835m	IFT81	132.199	14.596	13.956	14.596	14.49	15.333	14.808	15.333	14.596	14.49
Xelaev18007836m	ATP2A2	2049.29	232.644	216.114	235.9	219.455	231.01	231.01	229.372	222.778	231.01
Xelaev18007839m	ANAPC7	291.22	31.557	31.557	33.754	32.162	33.754	32.363	33.16	31.557	31.355
Xelaev18007841m	GPN3	268.971	28.669	26.243	28.669	29.067	29.859	31.617	31.81	31.81	31.229
Xelaev18007851m	ALDH2	31567.3	3513.57	3591.81	3381.82	3434.72	3539.71	3461.07	3461.07	3617.77	3565.8
Xelaev18007852m	ACAD10	2090.57	233.467	219.421	231.727	226.48	235.203	233.467	235.203	238.663	236.935
Xelaev18007854m	BRAP	553.851	65.138	58.286	57.353	57.353	63.335	62.427	66.033	60.138	63.787
Xelaev18007855m	ATXN2	462.884	50.37	47.72	50.745	48.101	53.343	53.711	55.173	50.745	52.975
Xelaev18007864m	NAA25	98.093	10.875	10.298	11.2	10.215	11.2	10.875	11.281	10.546	11.603
Xelaev18007865m	TRAFD1	679.631	77.895	69.056	77.895	74.071	79.515	76.809	77.353	72.966	74.071
Xelaev18007867m	HECTD4	8.091	0.827	0.846	0.984	0.96	0.91	0.922	0.904	0.846	0.891
Xelaev18007868m	RPL6	59215.5	6622.57	6429.05	6574.38	6429.05	6670.65	6526.06	6622.57	6718.6	6622.57
Xelaev18007869m	PTPN11	50.833	5.548	4.944	5.769	5.733	5.511	5.659	5.548	6.096	6.024
Xelaev18007893m	RFC5	616.673	62.864	62.338	64.952	69.07	71.102	69.58	68.048	72.614	76.105
Xelaev18007898m	PEBP1	386.05	46.117	42.266	41.703	41.985	44.211	40.568	39.417	43.935	45.847
Xelaev18007900m	TAOK3	38.913	3.462	4.022	4.373	4.293	4.637	4.611	4.585	4.506	4.426
Xelaev18007917m	TCN2	611.37	65.731	66.207	68.098	67.627	69.035	68.567	72.277	65.731	68.098
Xelaev18007921m	DUSP18	73.574	8.453	7.165	8.508	8.013	8.617	8.179	8.289	7.789	8.562
Xelaev18007924m	MZT2B	113.76	12.001	12.978	11.821	12.626	13.153	12.091	12.001	13.415	13.674
Xelaev18007933m	HINT1	1177.29	131.93	123.638	130.291	131.93	139.992	130.291	128.642	131.111	129.468
Xelaev18007940m	ISOC1	2910.3	327.987	314.264	330.255	305.004	323.434	323.434	309.646	343.758	332.519
Xelaev18007942m	SLC27A6	967.964	107.837	100.61	107.837	102.231	108.63	108.63	108.63	110.996	112.564
Xelaev18007946m	SLC12A2	186.137	22.378	18.922	22.378	21.531	22.238	21.531	21.103	17.728	18.328
Xelaev18007948m	PRRC1	254.45	27.868	25.694	29.032	28.646	29.991	28.452	28.839	27.281	28.646
Xelaev18007951m	LMNB1	788.214	69.759	37.569	62.007	57.978	75.712	91.185	110.695	118.715	164.593
Xelaev18007954m	PHAX	309.211	33.526	42.231	34.225	34.689	33.76	33.526	33.056	30.908	33.291
Xelaev18007955m	ALDH7A1	7704.65	870.216	820.132	845.312	788.244	876.4	826.454	851.564	907.081	919.245
Xelaev18007956m	GRAMD2B	254.47	25.82	24.422	28.328	26.991	29.453	29.823	29.823	28.705	31.104
Xelaev18007962m	CEP120	59.096	5.322	4.919	6.148	6.195	6.757	7.26	7.124	7.53	7.841
Xelaev18007964m	PPIC	4222.13	462.095	448.531	465.465	451.934	488.841	495.453	472.183	475.53	462.095
Xelaev18007966m	SNX2	97.114	9.645	10.942	9.96	10.761	10.701	11.36	10.272	12.232	11.241
Xelaev18007971m	SRFBP1	884.142	104.699	97.495	107.269	97.495	102.755	98.158	96.829	90.753	88.69
Xelaev18007973m	HSD17B4	7829.03	853.493	834.012	859.953	853.493	892.007	892.007	892.007	879.234	872.823
Xelaev18007977m	DMXL1	19.208	1.8	2.851	1.816	2.442	2.104	2.151	2.136	1.914	1.994
Xelaev18007979m	DTWD2	444.252	48.358	48.358	49.37	50.708	48.696	50.375	52.696	46.657	49.033
Xelaev18007981m	COMMD10	1424.99	159.003	146.17	160.151	156.697	161.296	164.715	163.578	154.38	159.003
Xelaev18007985m	AP3S1	859.429	110.755	102.708	111.367	86	88.63	98.296	97.66	82.677	81.337
Xelaev18007986m	CDO1	67.317	5.369	5.14	6.249	6.618	7.528	8.252	9.223	9.402	9.536
Xelaev18007989m	TMED7	3770.63	431.267	359.052	434.194	401.66	445.841	425.396	431.267	419.501	422.452
Xelaev18007999m	YTHDC2	332.944	35.866	32.455	36.979	36.145	38.63	39.175	38.082	37.256	38.356
Xelaev18008003m	DCP2	51.037	5.501	5.043	5.777	5.811	6.35	5.742	5.57	5.742	5.501
Xelaev18008004m	REEP5	9391.9	1026.33	1047.57	1054.61	1040.51	1026.33	1068.63	1075.61	1054.61	997.691
Xelaev18008005m	SRP19	1012.18	118.776	105.291	120.151	106.748	120.151	113.193	116.697	100.11	111.065
Xelaev18008006m	APC	8.714	0.819	0.761	0.943	0.906	1.016	1.086	1.081	1.051	1.051
Xelaev18008012m	WDR36	170.067	16.406	14.685	19.288	18.75	19.421	21.392	20.085	20.085	19.953
Xelaev18008014m	SLC25A46	289.061	42.932	31.13	32.728	30.206	31.13	33.406	31.818	28.093	27.618
Xelaev18008023m	FBXL17	84.711	9.095	8.628	9.619	8.962	10.132	9.358	9.292	9.877	9.748
Xelaev18008032m	NUDT12	157.928	17.696	16.494	18.636	17.099	17.933	17.696	17.578	16.979	17.815
Xelaev18008035m	PPIP5K2	203.801	21.638	20.953	22.986	21.808	22.986	24.145	23.651	23.319	22.315
Xelaev18008037m	PAM	14.938	1.641	1.621	1.58	1.621	1.651	1.839	1.898	1.559	1.528
Xelaev18008048m	Xelaev18008048m	182.056	19.548	18.481	20.448	20	20.448	20.746	20.894	21.042	20.448
Xelaev18008052m	LNPEP	1936.1	208.891	213.709	212.107	215.307	220.077	216.901	216.901	216.901	215.307
Xelaev18008053m	ERAP1	371.632	39.981	39.081	40.577	41.17	42.053	43.221	43.221	39.981	42.346
Xelaev18008054m	CAST	1285.34	163.358	132.494	154.644	141.715	139.686	135.594	132.494	136.621	148.73
Xelaev18008057m	ELL2	354.056	40.088	36.742	37.589	39.538	42.264	40.636	41.181	37.589	38.428
Xelaev18008060m	GLRX	12593.4	1315.15	1606.94	1407.94	1366.97	1377.26	1397.74	1346.33	1387.51	1387.51
Xelaev18008065m	TTC37	2566.26	279.585	268.996	285.872	277.479	292.11	292.11	287.957	290.036	292.11
Xelaev18008069m	KIAA0825	9.278	1.023	0.927	1.079	1.023	1.116	1.104	1.029	0.998	0.979
Xelaev18008070m	FAM172A	44.671	6.941	3.655	5.244	4.629	4.154	4.428	4.394	4.428	6.799
Xelaev18008083m	POLR3G	892.19	99.549	90.342	98.153	99.549	105.059	103.006	101.628	98.153	96.751
Xelaev18008091m	TMEM161B	33.517	3.693	3.507	3.64	3.507	3.979	3.719	3.979	3.746	3.746
Xelaev18008092m	CCNH	534.352	56.774	55.157	60.351	59.958	62.304	60.351	61.915	59.168	58.374
Xelaev18008093m	RASA1	107.886	11.814	10.778	11.898	11.472	12.572	12.321	12.404	11.557	13.069
Xelaev18008105m	XRCC4	182.806	21.475	24.592	19.928	20.212	19.642	19.928	20.212	18.189	18.629
Xelaev18008106m	TMEM167A	2523.57	290.854	270.637	289.035	249.936	283.554	296.292	287.212	283.554	272.494
Xelaev18008111m	ACOT12	284.564	32.044	28.291	34.323	30.886	33.871	32.503	32.044	29.95	30.653
Xelaev18008116m	MSH3	43.754	4.611	4.711	4.711	4.172	5.167	4.644	4.545	5.612	5.581
Xelaev18008117m	DHFR	27214.7	2931.99	3065.94	2999.22	3065.94	3021.52	3021.52	2999.22	2999.22	3110.15
Xelaev18008119m	FAM151B	1912.95	208.741	200.816	213.449	205.583	219.676	221.223	216.57	211.884	215.011
Xelaev18008120m	ZFYVE16	604.689	67.418	62.97	68.393	65.455	70.327	69.846	68.878	65.455	65.947
Xelaev18008122m	RAD17	360.766	39.053	36.042	40.818	37.859	41.98	41.11	40.526	41.11	42.269
Xelaev18008123m	AK6	1362.47	151.107	142.812	152.925	148.364	152.925	154.734	158.326	147.444	153.831
Xelaev18008125m	OCLN	775.378	75.737	73.161	84.504	82.656	92.339	91.746	91.151	91.746	92.339
Xelaev18008131m	SMN1	1793.68	205.605	194.514	197.309	194.514	206.975	197.309	194.514	200.089	202.854
Xelaev18008132m	BDP1	7.542	1.192	0.985	0.935	0.659	0.72	0.637	0.597	0.868	0.95
Xelaev18008139m	MRPS27	4148.86	467.794	440.564	467.794	443.999	467.794	454.25	461.039	464.421	481.205
Xelaev18008140m	PTCD2	14.804	1.574	1.658	1.646	1.622	1.646	1.682	1.729	1.598	1.646
Xelaev18008142m	TNPO1	13.901	1.92	1.657	1.749	1.497	1.449	1.332	1.468	1.488	1.342
Xelaev18008145m	TMEM171	320.164	20.252	20.834	29.582	31.895	40.215	43.255	45.093	43.947	45.093
Xelaev18008154m	UTP15	108.505	11.663	10.848	11.421	12.141	12.845	12.456	12.69	12.141	12.299
Xelaev18008160m	HEXB	1670.04	184.184	194.127	179.118	184.184	187.941	185.44	184.184	182.923	187.941
Xelaev18008161m	GFM2	565.078	63.046	59.827	63.501	61.214	63.955	64.408	64.408	62.132	62.589
Xelaev18008169m	COL4A3BP	1153.05	132.11	120.997	130.282	123.808	131.197	128.444	133.022	125.669	127.521
Xelaev18008170m	POLK	123.645	12.617	12.086	13.864	12.932	14.576	15.278	15.079	13.245	13.967
Xelaev18008172m	POC5	210.502	17.238	15.841	20.497	21.056	24.14	25.725	26.419	27.792	31.794
Xelaev18008174m	IQGAP2	290.499	31.799	29.691	32.489	31.335	33.402	33.629	33.175	32.719	32.26
Xelaev18008184m	WDR41	68.636	6.922	6.677	6.971	7.597	7.88	8.206	7.833	8.113	8.437
Xelaev18008186m	TBCA	3024.12	323.777	318.762	318.762	321.273	338.672	336.205	328.767	382.125	355.779
Xelaev18008187m	AP3B1	516.015	56.401	52.506	56.401	56.401	59.789	58.526	57.679	60.208	58.103
Xelaev18008188m	SCAMP1	330.216	40.258	35.956	39.553	34.478	35.466	38.13	36.686	33.98	35.711
Xelaev18008192m	ARSB	2233.93	249.26	239.915	243.667	245.535	251.115	254.813	247.4	249.26	252.966
Xelaev18008194m	DMGDH	3225.34	354.49	335.077	362.704	343.441	357.235	368.145	351.739	378.951	373.561
Xelaev18008195m	BHMT	2286.7	280.026	242.847	262.583	231.81	242.847	251.894	235.512	264.348	274.839
Xelaev18008196m	JMY	40.606	4.315	4.147	4.37	4.726	4.175	5.021	4.807	4.453	4.59
Xelaev18008201m	TENT2	100.352	7.647	7.212	9.963	10.201	12.199	12.867	12.646	13.087	14.53
Xelaev18008204m	MTX3	551.687	60.657	56.541	60.204	60.657	62.905	62.905	61.56	63.352	62.905
Xelaev18008207m	CDK7	540.698	56.198	53.051	64.458	59.287	62.321	61.891	63.179	59.287	61.027
Xelaev18008213m	CCNB1	219.722	11.445	12.352	19.803	21.522	28.025	30.595	32.437	31.771	31.771
Xelaev18008215m	PIK3R1	53.555	5.854	5.441	6.257	5.813	6.257	6.137	6.097	5.483	6.217
Xelaev18008218m	MAST4	11.065	2.06	1.929	1.914	1.392	1.003	0.81	0.762	0.623	0.572
Xelaev18008224m	NLN	617.08	68.853	65.283	69.862	65.797	70.866	69.358	68.347	68.853	69.862
Xelaev18008227m	TRAPPC13	212.463	17.605	17.075	21.326	20.338	23.252	27.081	27.527	28.116	30.143
Xelaev18008242m	DIMT1	454.653	55.404	51.106	52.911	50.743	52.191	50.014	47.433	48.913	45.938
Xelaev18008249m	NDUFAF2	430.349	47.255	43.76	48.972	46.909	51.344	48.972	48.63	47.255	47.255
Xelaev18008265m	SETD9	50.244	5.305	5.679	5.456	5.418	5.456	5.305	5.605	5.901	6.12
Xelaev18008271m	IL6ST	58.756	6.117	5.589	6.585	6.724	7.27	6.953	6.77	6.632	6.117
Xelaev18008273m	DDX4	4424	517.123	469.465	495.313	484.29	509.887	498.969	502.617	480.598	465.736
Xelaev18008281m	MTREX	141.976	18.454	14.945	16.577	16.677	15.767	15.358	15.665	14.529	14.004
Xelaev18008284m	DHX29	1168.09	132.468	119.927	133.415	123.832	134.361	134.361	135.304	126.732	127.694
Xelaev18008289m	GPX8	886.682	97.422	104.125	90.483	102.469	99.118	99.681	96.282	97.422	99.681
Xelaev18008295m	SNX18	58.482	6.481	5.646	6.577	5.994	6.625	6.481	6.672	6.91	7.098
Xelaev18008300m	NDUFS4	4310.35	480.535	446.188	490.666	463.476	490.666	473.738	497.378	470.326	497.378
Xelaev18008303m	MOCS2	820.758	89.661	91.562	90.297	90.297	90.297	96.562	92.822	93.449	85.812
Xelaev18008304m	ITGA2	18.965	2.039	1.981	2.107	2.197	2.096	2.073	2.004	1.993	2.476
Xelaev18008314m	MRPS30	983.517	109.217	102.615	108.399	105.108	111.657	106.758	108.399	114.881	116.482
Xelaev18008317m	NNT	10018.1	1126.75	1069.48	1118.63	1077.73	1142.92	1110.5	1110.5	1126.75	1134.85
Xelaev18008318m	PAIP1	520.273	57.838	58.619	62.847	57.447	56.266	57.447	62.467	55.077	52.266
Xelaev18008321m	HMGCS1	20.806	2.29	2.29	2.275	2.381	2.35	2.305	2.35	2.275	2.29
Xelaev18008324m	SELENOP	822.986	88.401	88.401	90.441	94.481	96.482	86.347	104.367	87.033	87.033
Xelaev18008331m	OXCT1	21558.4	2318.24	2583.29	2318.24	2407.64	2372.01	2389.84	2336.21	2389.84	2443.09
Xelaev18008335m	RPL37	105912	12505.1	12164.9	12301.4	11471.8	11751.1	11541.9	12301.4	11331.1	10542.9
Xelaev18008336m	PRKAA1	461.425	48.281	44.371	52.098	49.436	53.226	52.475	55.462	52.475	53.601
Xelaev18008337m	TTC33	240.302	29.004	25.145	27.273	27.098	26.216	26.039	26.747	25.683	27.098
Xelaev18008344m	C9	5711.65	628.605	609.978	637.843	605.289	651.609	614.654	628.605	669.8	665.269
Xelaev18008352m	WDR70	1253.88	134.735	130.539	138.887	134.735	144.019	140.948	141.974	144.019	144.019
Xelaev18008353m	NUP155	1703.53	185.965	177.264	187.402	184.524	198.771	194.534	191.691	190.265	193.114
Xelaev18008357m	NIPBL	30.736	3.352	2.864	3.605	3.458	3.688	3.522	3.437	3.352	3.458
Xelaev18008361m	NADK2	1145.26	123.002	118.926	121.988	113.762	129.031	120.97	116.87	147.52	153.192
Xelaev18008366m	UGT3A2	5166.39	584.578	543.179	576.384	572.272	584.578	584.578	588.66	564.015	568.149
Xelaev18008369m	SPEF2	2.566	0.26	0.269	0.283	0.287	0.294	0.3	0.306	0.29	0.278
Xelaev18008372m	DNAJC21	507.103	56.779	59.491	58.482	55.399	56.779	57.122	54.703	53.297	55.052
Xelaev18008373m	RAD1	317.645	32.619	31.905	34.502	32.856	38.175	40.638	36.582	33.329	37.039
Xelaev18008378m	AMACR	2085.45	231.031	218.86	236.181	220.613	225.842	231.031	224.103	249.733	248.053
Xelaev18008384m	TARS	5785.19	652.67	624.6	643.363	619.878	661.929	638.691	643.363	648.022	652.67
Xelaev18008389m	ZFR	25.545	2.829	2.657	2.96	2.772	2.885	3.071	2.734	2.791	2.847
Xelaev18008390m	MTMR12	40.533	4.45	4.119	4.352	4.516	4.678	4.774	4.548	4.548	4.548
Xelaev18008398m	LMAN1	2095.2	237.849	224.868	241.052	223.225	242.648	229.768	231.393	229.768	234.63
Xelaev18008413m	ATP8B1	1805.98	186.433	178.894	199.783	193.883	211.432	212.874	212.874	204.174	205.632
Xelaev18008414m	NARS	2214.41	246.268	238.041	238.041	244.633	255.97	242.993	241.347	254.366	252.756
Xelaev18008415m	FECH	4152.84	472.18	432.359	452.439	428.978	478.69	452.439	455.752	491.607	488.39
Xelaev18008420m	TXNL1	1596.14	195.462	159.185	179.525	180.769	177.029	184.481	180.769	170.733	168.191
Xelaev18008427m	RAB27B	2044.48	226.892	203.829	228.508	220.389	242.878	228.508	233.332	222.021	238.122
Xelaev18008440m	TSPAN3	2796.11	302.275	302.275	313.753	309.177	313.753	316.033	325.102	311.468	302.275
Xelaev18008441m	BAAT	200.302	22.202	20.11	21.373	22.613	22.885	23.967	22.339	22.749	22.064
Xelaev18008445m	SKA1	1047.23	116.575	107.016	116.575	111.394	120.834	119.986	118.285	117.431	119.136
Xelaev18008447m	ME2	1940.48	216.366	201.729	211.523	205.01	222.77	219.575	217.972	222.77	222.77
Xelaev18008449m	ELAC1	178.453	19.686	19.42	18.479	19.018	21.261	19.951	19.686	19.951	21.001
Xelaev18008452m	ACAA2	21593.6	2283.81	2625.92	2371.06	2371.06	2371.06	2405.62	2405.62	2371.06	2388.36
Xelaev18008456m	CTIF	29.698	2.975	3.388	3.307	3.708	3.163	3.327	3.327	2.975	3.529
Xelaev18008460m	DYM	433.924	47.761	51.317	48.869	46.641	48.593	48.317	46.641	49.144	46.641
Xelaev18008462m	DYM	255.209	29.544	31.952	29.544	27.546	26.692	26.52	28.72	25.474	29.216
Xelaev18008463m	C18ORF32	2749.05	298.583	292.471	304.637	300.607	318.557	314.609	322.483	304.637	292.471
Xelaev18008466m	SMAD2	278.615	27.068	27.727	30.523	28.38	31.576	34.668	32.825	33.853	31.994
Xelaev18008469m	IER3IP1	4446.05	473.864	439.324	490.843	490.843	524.27	514.313	480.678	524.27	507.642
Xelaev18008470m	HDHD2	4631.38	524.898	490.085	521.065	490.085	528.722	509.515	517.224	521.065	528.722
Xelaev18008475m	EEF2	72.114	9.702	6.83	9.084	7.838	8.043	7.527	7.838	7.209	8.043
Xelaev18008486m	FDX2	86.162	9.59	10.278	9.079	9.463	9.967	9.526	9.716	9.272	9.272
Xelaev18008488m	HAUS1	1627.08	175.371	167.507	180.544	177.964	188.206	188.206	188.206	183.111	177.964
Xelaev18008489m	ATP5F1A	30591.4	3234.09	3682.81	3460.97	3436.01	3310.31	3310.31	3360.78	3310.31	3485.85
Xelaev18008492m	EPG5	65.265	6.864	7.131	7.289	6.971	7.446	7.706	7.81	7.024	7.024
Xelaev18008501m	PIK3C3	178.292	17.601	16.898	19.384	20.055	20.717	21.112	22.15	20.055	20.321
Xelaev18008515m	TPGS2	53.395	5.243	4.547	5.664	5.83	6.398	6.478	6.478	6.318	6.438
Xelaev18008520m	UBAP1	316.652	38.896	35.825	37.726	33.885	36.542	35.344	34.13	31.902	32.402
Xelaev18008522m	KIF27	46.943	4.718	4.837	5.227	4.994	5.419	5.342	5.495	5.457	5.457
Xelaev18008523m	PIGO	490.382	53.086	52.277	52.277	51.057	59.03	60.582	54.292	54.292	53.489
Xelaev18008524m	VWA5A	16775.1	1842.45	1828.55	1856.32	1800.64	1883.93	1883.93	1897.69	1883.93	1897.69
Xelaev18008548m	VCP	10450.3	1156.57	1104.46	1165.18	1104.46	1190.88	1165.18	1139.28	1224.88	1199.41
Xelaev18008549m	2019-03-01	681.314	70.889	69.058	70.889	71.495	72.701	70.889	74.493	91.546	89.353
Xelaev18008550m	STOML2	8704.14	971.024	929.606	984.678	950.402	957.295	984.678	1005.02	950.402	971.024
Xelaev18008555m	UNC13B	36.144	3.745	3.592	3.836	3.986	4.163	4.395	4.366	3.986	4.074
Xelaev18008564m	ATP8B2	84.766	15.406	7.943	10.47	9.838	7.083	6.6	7.552	6.878	12.996
Xelaev18008617m	SIGMAR1	2367.9	274.079	263.42	243.462	252.604	263.42	263.42	259.833	293.247	254.418
Xelaev18008620m	DCTN3	5039.69	565.866	505.224	577.723	545.911	589.498	569.827	569.827	553.922	561.894
Xelaev18008622m	DNAI1	70.85	7.739	6.754	7.909	7.454	8.244	8.465	8.133	8.021	8.133
Xelaev18008634m	TLN1	552.23	60.175	59.718	58.338	57.876	60.632	59.718	61.087	66.904	67.784
Xelaev18008636m	TPM2	800.704	206.676	61.724	121.062	91.095	51.686	47.95	51.686	49.455	119.369
Xelaev18008642m	MYO3B	287.579	31.693	29.762	30.974	31.454	33.117	33.117	32.408	32.408	32.645
Xelaev18008645m	SMPD3	69.285	7.33	7.017	7.382	7.226	7.996	8.197	8.247	7.844	8.046
Xelaev18008652m	HTRA2	1361.94	139.008	143.686	147.162	148.315	156.305	156.305	154.036	158.563	158.563
Xelaev18008653m	AUP1	1124.92	132.774	123.024	126.601	118.499	125.71	129.259	125.71	122.124	121.221
Xelaev18008662m	PDCD4	7379.2	808.536	777.913	808.536	802.442	820.679	844.791	844.791	826.728	844.791
Xelaev18008676m	IDH3B	9482.99	1095.54	969.132	1056.61	1009.22	1087.8	1025.1	1040.89	1080.03	1118.68
Xelaev18008741m	ALMS1	551.819	60.324	58.639	63.653	59.061	64.477	64.888	66.525	60.324	53.928
Xelaev18008749m	CCT7	2801.88	304.32	289.802	299.507	297.09	313.872	306.717	304.32	344.28	341.973
Xelaev18008754m	DCTN1	159.348	18.286	17.79	17.539	17.665	18.039	17.914	17.539	17.414	17.162
Xelaev18008760m	NAT8B	701.576	79.801	78.773	81.84	78.257	77.221	76.7	80.313	75.655	73.016
Xelaev18008771m	ZNF638	283.225	31.291	27.635	32.177	29.714	31.956	32.177	33.27	31.735	33.27
Xelaev18008773m	EXOC6B	129.011	12.218	10.093	13.814	13.918	15.655	16.054	16.352	15.454	15.454
Xelaev18008780m	PAIP2B	1594.64	185.425	159.417	190.423	152.885	185.425	173.167	170.04	190.423	187.432
Xelaev18008785m	SLC4A11	446.012	55.089	51.765	48.376	44.916	49.925	47.44	49.307	52.069	47.126
Xelaev18008792m	ATRN	322.464	39.364	30.755	35.411	34.141	37.9	36.912	36.414	34.905	36.663
Xelaev18008801m	UBOX5	56.842	6.088	5.778	6.651	6.608	6.991	6.779	6.436	5.733	5.778
Xelaev18008815m	SMOX	440.203	36.894	33.936	42.846	43.453	50.776	54.694	58.77	56.883	61.952
Xelaev18008826m	SUCLG1	9683.76	1064.93	1080.25	1080.25	1057.25	1080.25	1064.93	1072.6	1103.06	1080.25
Xelaev18008842m	KDM3A	433.547	42.126	39.144	48.216	46.456	50.296	51.324	50.639	50.982	54.363
Xelaev18008845m	IMMT	2226.22	252.585	235.113	250.86	240.408	252.585	252.585	256.02	240.408	245.657
Xelaev18008857m	MAEA	419.949	45.049	39.961	45.979	45.049	49.029	48.425	50.825	48.425	47.208
Xelaev18008861m	SLBP	116.782	14.343	11.825	12.492	12.346	13.644	13.431	13.36	13.217	12.124
Xelaev18008863m	TACC3	2352.74	271.32	244.61	273.193	261.891	265.677	263.786	265.677	256.176	250.416
Xelaev18008868m	LETM1	122.717	13.815	13.056	13.815	12.959	14.002	13.909	13.627	13.721	13.815
Xelaev18008873m	NELFA	359.927	39.825	33.993	40.394	38.681	42.085	42.922	41.523	40.394	40.11
Xelaev18008882m	FAM193A	15.443	1.829	1.576	1.725	1.672	1.746	1.808	1.746	1.619	1.725
Xelaev18008883m	TNIP2	33.541	3.332	3.068	3.497	3.567	4.875	4.291	3.775	3.497	3.637
Xelaev18008885m	ADD1	229.045	30.315	24.058	26.224	25.152	23.26	23.581	24.215	24.373	27.866
Xelaev18008917m	WFS1	247.438	28.5	28.691	26.377	25.985	28.5	27.156	26.377	28.31	27.542
Xelaev18008925m	STX18	232.281	24.834	26.163	25.169	25.169	25.002	27.464	26.979	25.668	25.833
Xelaev18008929m	LYAR	2728.73	290.944	297.632	279.053	314.041	318.881	302.601	320.486	294.297	310.793
Xelaev18008935m	WDR1	14577.5	1706.54	1527.95	1647.74	1564.21	1659.56	1564.21	1647.74	1588.22	1671.35
Xelaev18008952m	QDPR	5876.36	665.995	621.82	665.995	621.82	665.995	646.476	661.132	661.132	665.995
Xelaev18008967m	DHX15	719.244	77.676	74.155	81.717	80.57	78.837	82.289	80.57	82.86	80.57
Xelaev18008971m	PI4K2B	216.817	24.895	22.723	25.876	24.565	25.059	24.565	25.223	22.213	21.698
Xelaev18008972m	ZCCHC4	143.897	15.272	13.162	17.075	14.463	17.296	17.075	16.181	16.742	16.63
Xelaev18008996m	RPL9	2900.72	342.606	322.89	318.433	318.433	316.193	316.193	302.596	338.271	325.108
Xelaev18008997m	LIAS	981.327	108.396	120.354	109.917	106.099	112.936	105.33	105.33	106.099	106.867
Xelaev18008998m	UGDH	313.581	35.683	33.08	34.649	32.022	35.425	34.649	35.683	35.683	36.708
Xelaev18009003m	PDS5A	81.54	7.587	5.936	7.587	7.518	8.848	9.919	10.468	11.005	12.671
Xelaev18009011m	UCHL1	16377.6	1782.67	1742.08	1915.85	1796.14	1862.96	1849.66	1862.96	1769.17	1796.14
Xelaev18009018m	TMEM33	1267.72	128.552	133.428	144.912	140.163	137.289	148.677	147.739	140.163	146.798
Xelaev18009019m	SLC30A9	331.136	36.43	33.817	37.712	36.172	37.712	37.966	38.726	35.913	36.688
Xelaev18009022m	ATP8A1	33.466	3.597	3.244	3.647	3.647	4.084	3.915	3.794	3.769	3.769
Xelaev18009030m	COMMD8	691.255	75.569	71.924	76.083	75.053	77.617	79.641	77.617	77.107	80.644
Xelaev18009039m	ZAR1	771.56	218.746	84.757	79.253	73.001	74.892	65.281	65.935	58.637	51.058
Xelaev18009040m	FRYL	25.401	2.61	2.494	2.724	2.874	2.892	3.13	3.04	2.874	2.762
Xelaev18009057m	FIP1L1	1422.68	161.582	151.403	160.463	152.546	161.582	158.215	159.34	157.087	160.463
Xelaev18009070m	TMEM165	319.524	36.323	31.645	37.111	34.524	34.321	35.727	39.245	33.712	36.915
Xelaev18009078m	EXOC1	163.937	13.998	12.802	16.144	16.836	19.893	20.278	20.788	20.661	22.537
Xelaev18009081m	PAICS	7319.9	821.128	738.641	792.056	762.561	803.734	792.056	792.056	911.61	906.06
Xelaev18009082m	PPAT	41.111	3.64	3.673	4.054	6.326	4.424	5.486	3.991	5.4	4.116
Xelaev18009099m	VPS37A	409.76	48.275	39.768	47.661	41.703	48.886	46.116	48.275	42.341	46.736
Xelaev18009104m	MTUS1	43.552	6.477	5.254	5.485	4.575	4.884	4.609	4.505	3.827	3.936
Xelaev18009106m	FAT1	22.317	2.501	2.124	2.53	2.367	2.545	2.646	2.501	2.574	2.53
Xelaev18009125m	ACSL1	2414.5	259.227	251.137	265.24	265.24	279.103	279.103	284.976	267.235	263.241
Xelaev18009133m	TRAPPC11	277.119	30.982	26.68	32.734	30.316	32.951	32.299	31.643	29.87	29.646
Xelaev18009134m	RWDD4	317.094	36.896	32.31	34.635	34.176	36.673	36.449	35.32	35.999	34.635
Xelaev18009141m	WWC2	70.323	7.789	7.205	8.049	7.152	9.515	9.268	7.366	7.044	6.935
Xelaev18009148m	SPCS3	2504.65	273.943	264.878	281.106	277.534	286.428	289.954	277.534	277.534	275.741
Xelaev18009158m	HMGB2	24118.9	2790.89	2454.55	2717.66	2549.81	2772.66	2662.2	2736.05	2680.74	2754.38
Xelaev18009160m	GALNT7	87.802	9.328	9.064	9.328	9.064	10.23	9.976	9.976	10.356	10.482
Xelaev18009163m	AADAT	696.547	74.286	72.049	78.142	75.396	80.314	79.773	80.314	76.499	79.773
Xelaev18009168m	NEK1	372.713	40.834	44.07	42.609	42.02	42.609	42.02	42.609	38.429	37.515
Xelaev18009169m	SH3RF1	63.679	6.746	6.448	6.991	7.33	7.378	7.378	6.991	7.233	7.185
Xelaev18009174m	TRIM63	71.586	7.11	6.504	7.584	7.11	8.221	8.048	8.163	9.67	9.176
Xelaev18009192m	PPID	5498.39	596.599	583.07	627.77	587.591	623.35	623.35	605.56	632.18	618.918
Xelaev18009212m	PLRG1	976.851	112.152	99.674	114.436	106.757	111.387	109.081	107.534	105.979	109.852
Xelaev18009222m	ARFIP1	322.434	35.837	34.106	34.976	34.325	36.051	37.531	35.192	36.051	38.365
Xelaev18009224m	ERCC8	65.02	6.592	6.438	6.898	6.796	7.349	7.099	7.299	8.418	8.131
Xelaev18009232m	RPS3A	21801.6	2361.98	2397.23	2344.28	2501.84	2414.78	2432.29	2449.74	2449.74	2449.74
Xelaev18009233m	LRBA	317.709	34.413	33.365	34.933	34.673	36.732	36.732	36.477	35.192	35.192
Xelaev18009241m	ARHGAP10	92.059	9.456	9.588	10.044	9.654	10.108	10.491	10.236	11.179	11.303
Xelaev18009255m	SMAD1	608.142	62.578	55.773	63.531	63.055	71.922	70.084	70.545	74.65	76.003
Xelaev18009261m	ABCE1	1059.77	119.723	114.661	117.201	117.201	120.559	122.226	116.357	118.884	112.957
Xelaev18009262m	OTUD4	934.412	104.514	96.84	104.514	99.934	107.529	105.271	106.025	104.514	105.271
Xelaev18009263m	SMARCA5	751.109	79.575	79.575	83.802	82	85.59	86.774	84.996	83.802	84.996
Xelaev18009264m	GAB1	142.501	17.432	15.364	17.025	15.889	15.889	15.574	15.993	15.364	13.972
Xelaev18009266m	USP38	198.917	23.365	24.752	24.599	21.794	21.476	22.584	22.426	18.712	19.208
Xelaev18009270m	INPP4B	128.429	13.953	14.13	15.701	13.774	14.307	15.27	15.096	13.325	12.872
Xelaev18009272m	ZNF330	382.224	41.97	41.686	42.535	42.817	42.817	44.212	42.817	41.686	41.686
Xelaev18009279m	CANX	30.586	3.143	3.186	3.651	3.568	3.61	3.251	3.631	3.208	3.337
Xelaev18009287m	RAB33B	331.231	36.564	33.688	38.808	35.424	38.531	36.28	36.847	36.28	38.808
Xelaev18009289m	NAA15	2351.74	261.109	255.38	261.109	251.536	263.009	264.903	263.009	268.679	263.009
Xelaev18009290m	NDUFC1	2802.76	315.797	300.051	307.974	307.974	313.85	321.603	300.051	313.85	321.603
Xelaev18009295m	MGARP	6375.54	714.96	694.807	754.775	694.807	709.938	744.881	779.346	653.968	628.059
Xelaev18009308m	PGRMC2	718.669	73.439	77.368	78.479	80.687	85.048	79.033	73.439	85.048	86.127
Xelaev18009309m	LARP1B	73.363	7.695	5.669	8.382	6.863	8.269	8.551	8.773	8.829	10.331
Xelaev18009313m	INTU	22.787	2.288	2.368	2.368	2.304	2.572	2.787	2.772	2.772	2.557
Xelaev18009327m	ANXA5	4960.28	579.874	544.652	544.652	536.711	552.551	540.687	528.726	552.551	579.874
Xelaev18009330m	OSTC	238.258	26.227	26.227	25.177	26.92	25.879	28.289	26.053	27.607	25.879
Xelaev18009334m	SEC24B	196.215	20.277	18.307	21.558	20.76	22.346	23.282	23.899	23.127	22.66
Xelaev18009338m	PYURF	242.898	25.77	26.092	27.673	26.888	27.517	26.73	26.73	27.204	28.294
Xelaev18009347m	GAR1	967.993	110.971	89.115	107.651	111.632	105.643	130.297	107.651	110.31	94.723
Xelaev18009353m	AP1AR	205.596	22.162	19.936	23.25	23.712	24.475	22.63	22.006	23.865	23.558
Xelaev18009359m	ANK2	7.494	0.799	0.768	0.84	0.804	0.835	0.891	0.861	0.85	0.845
Xelaev18009370m	SEC24D	79.276	8.897	8.231	8.717	8.957	9.49	9.254	8.657	8.415	8.657
Xelaev18009377m	C4ORF3	347.825	38.855	46.47	36.864	38.361	38.113	37.865	35.344	36.36	39.592
Xelaev18009395m	AIMP1	7982.14	882.16	831.167	900.993	863.173	919.677	900.993	919.677	875.849	888.455
Xelaev18009398m	INTS12	1046.64	107.898	91.734	117.411	109.646	120.811	130.013	128.355	120.811	119.964
Xelaev18009401m	PPA2	4887.33	534.872	523.136	554.233	550.38	550.38	554.233	546.518	546.518	527.058
Xelaev18009408m	CENPE	67.974	6.524	6.406	7.673	7.278	8.063	8.063	8.173	7.785	8.008
Xelaev18009414m	NFKB1	45.723	5.019	4.541	5.019	4.85	5.418	5.253	5.385	4.985	5.253
Xelaev18009418m	PPP3CA	1528.35	167.071	165.824	164.574	165.824	172.029	174.49	175.716	173.261	169.556
Xelaev18009425m	MTTP	616.546	69.111	69.111	69.111	66.156	70.572	70.572	69.6	66.652	65.659
Xelaev18009440m	METAP1	803.371	87.206	86.538	89.202	85.868	91.183	88.538	88.538	93.149	93.149
Xelaev18009441m	EIF4E	6408.97	734.29	643.63	734.29	694.552	739.199	704.566	724.433	714.525	719.486
Xelaev18009452m	PDLIM5	346.002	41.956	38.459	36.806	35.407	39.004	38.732	39.547	37.36	38.732
Xelaev18009454m	HPGDS	92509.4	10077.2	9455.19	10000.2	10077.2	10383.2	10761.4	10459.2	10836.5	10459.2
Xelaev18009456m	SMARCAD1	107.355	12.322	11.336	12.724	11.668	12.483	12.241	12.16	11.085	11.336
Xelaev18009486m	G3BP2	868.296	97.15	87.461	107.223	98.51	94.412	106.56	91.65	96.467	88.864
Xelaev18009488m	USO1	330.453	35.054	35.861	36.396	36.129	36.928	38.248	38.51	36.663	36.663
Xelaev18009507m	ALB	14240.9	1581.29	1648.86	1637.67	1547.1	1626.46	1535.64	1581.29	1512.62	1569.93
Xelaev18009518m	SDAD1	141.665	21.026	20.23	19.323	15.879	15.556	13.795	13.003	12.197	10.656
Xelaev18009519m	NUP54	879.945	95.128	92.2	100.184	96.581	101.613	102.326	96.581	98.027	97.305
Xelaev18009521m	SCARB2	130.187	15.681	13.601	14.704	13.499	15	13.905	14.006	14.207	15.584
Xelaev18009527m	2019-09-11	1447.41	131.895	130.697	153.85	164.876	167.044	177.706	177.706	178.757	164.876
Xelaev18009536m	MRPL1	3172.14	350.226	329.308	357.952	337.207	357.952	360.515	363.07	357.952	357.952
Xelaev18009539m	ANXA3	3748.88	436.659	403.595	428.505	411.976	417.519	420.278	411.976	411.976	406.397
Xelaev18009540m	PTPN9	219.152	24.34	21.807	24.67	24.505	25.652	25.163	24.999	24.174	23.841
Xelaev18009547m	PRC1	470.765	40.517	40.517	46.857	48.503	54.139	59.987	60.754	55.323	64.168
Xelaev18009556m	SARAF	130.303	13.618	12.779	13.722	14.238	14.849	15.95	15.552	14.646	14.95
Xelaev18009580m	UHRF1	1279.16	129.675	126.386	143.625	138.315	142.568	150.951	151.988	147.826	147.826
Xelaev18009615m	TIMM44	1676.9	182.727	184.082	185.434	180.004	189.469	190.807	189.469	188.128	186.783
Xelaev18009628m	SPPL2B	46.781	5.05	5.289	5.289	5.187	5.221	5.187	5.491	5.085	4.981
Xelaev18009631m	LMNB2	633.951	67.913	63.338	71.901	65.892	72.395	71.901	72.887	71.901	75.822
Xelaev18009638m	PIAS4	66.997	6.178	5.265	7.451	7.001	7.989	8.23	8.278	8.23	8.374
Xelaev18009640m	EEF2	15158.6	1646.16	1621.38	1658.49	1670.79	1719.66	1707.49	1695.29	1707.49	1731.8
Xelaev18009645m	MRPL54	7379.28	788.999	744.171	814.264	769.885	820.542	788.999	814.264	931.192	906.968
Xelaev18009647m	TJP3	105.022	11.01	9.732	11.446	10.715	12.439	12.439	12.088	12.369	12.785
Xelaev18009657m	HMG20B	112.021	13.951	11.936	12.955	12.787	12.871	12.871	12.787	11.241	10.622
Xelaev18009660m	PLIN3	6545.38	740.676	691.099	724.271	724.271	740.676	713.268	735.22	735.22	740.676
Xelaev18009662m	HDGFL2	336.927	36.726	33.095	39.728	35.447	37.988	38.986	37.233	38.738	38.986
Xelaev18009663m	UBXN6	603.83	70.232	61.82	66.076	64.197	69.775	68.857	66.542	68.396	67.935
Xelaev18009664m	CHAF1A	476.91	58.043	56.989	51.594	50.857	51.594	53.054	51.226	51.96	51.594
Xelaev18009665m	SH3GL1	676.389	73.411	67.618	78.027	74.446	80.046	75.988	78.027	70.8	78.027
Xelaev18009673m	DNAJA1	523.642	53.237	54.474	56.108	56.918	60.901	62.466	60.901	58.524	60.113
Xelaev18009675m	ELP1	927.491	101.029	94.797	102.567	103.333	105.619	107.89	107.89	101.799	102.567
Xelaev18009694m	FNTA	4248.02	462.546	455.389	466.11	466.11	480.278	480.278	480.278	476.75	480.278
Xelaev18009696m	SH2D4A	70.593	8.808	7.056	8.332	7.356	7.849	8.236	8.949	6.701	7.307
Xelaev18009715m	PPP1R3B	8.355	0.83	0.817	0.868	0.905	0.967	1.021	0.948	1.039	0.961
Xelaev18009729m	MBD3	166.41	18.229	17.726	19.02	17.928	19.312	18.922	18.824	17.625	18.824
Xelaev18009734m	AP1M1	908.17	92.074	98.09	103.354	98.09	103.93	105.079	102.196	96.305	109.052
Xelaev18009742m	PIGG	51.885	5.741	5.586	5.507	5.547	6.047	5.468	5.857	5.971	6.161
Xelaev18009743m	ATP5ME	27894.2	3057.98	2782.04	2989.84	3035.32	3214.98	3103.12	3148.03	3259.35	3303.51
Xelaev18009744m	GAK	442.115	49.861	45.241	52.286	50.558	52.286	52.286	50.21	45.602	43.785
Xelaev18009750m	SGTA	2852.64	317.499	297.277	317.499	313.049	330.708	319.715	319.715	313.049	324.129
Xelaev18009751m	THOP1	10453.8	1130.13	1104.05	1147.4	1130.13	1181.66	1156	1181.66	1207.13	1215.58
Xelaev18009761m	DAZAP1	945.344	114.862	103.319	99.822	100.526	107.451	105.393	101.227	101.227	111.519
Xelaev18009762m	GAMT	21458.5	2386.73	2230.06	2369.52	2265.22	2489.09	2386.73	2403.91	2438.11	2489.09
Xelaev18009764m	NDUFS7	5079.31	579.116	536.087	582.97	540.049	559.705	547.942	582.97	567.498	582.97
Xelaev18009768m	CIRBP	51609.4	5471.41	5809.99	5599.23	5976.64	5599.23	5768.06	5683.87	5641.61	6059.35
Xelaev18009771m	ATP5F1D	12110.8	1368.44	1287.94	1323.99	1315.02	1394.8	1350.74	1368.44	1350.74	1350.74
Xelaev18009780m	GPX4	1081.92	109.108	145.859	108.276	126.831	113.23	124.474	117.294	125.262	111.588
Xelaev18009785m	TMEM259	95.187	10.733	11.494	10.669	10.605	10.152	11.305	9.493	11.242	9.493
Xelaev18009787m	WDR18	301.987	38.519	38.519	32.898	31.444	32.416	32.174	31.931	30.709	33.378
Xelaev18009796m	PTBP1	929.32	97.779	87.319	105.722	100.693	105.009	110.667	108.558	105.722	107.851
Xelaev18009818m	IGLL5	254.081	28.576	27.615	27.228	27.422	28.958	29.528	29.717	27.615	27.422
Xelaev18009819m	NDUFA7	2166.75	240.221	233.298	255.567	238.496	241.941	238.496	253.877	233.298	231.556
Xelaev18009826m	LARP6	15.049	2.238	2.138	2.016	1.787	1.658	1.437	1.334	1.299	1.144
Xelaev18009829m	MED11	33.532	3.709	3.476	3.847	3.616	3.778	4.05	3.593	3.869	3.593
Xelaev18009831m	Xelaev18009831m	322.431	35.123	34.383	35.613	34.383	37.794	35.613	36.588	36.345	36.588
Xelaev18009834m	RANBP3	925.598	101.282	98.275	102.029	100.533	103.516	107.935	104.997	102.773	104.257
Xelaev18009849m	Xelaev18009849m	9338.54	1075.39	1075.39	1025.17	1089.57	1046.8	951.798	974.023	1017.92	1082.49
Xelaev18009855m	SF3A2	680.375	73.534	68.483	73.534	76.842	79.022	80.646	78.479	74.642	75.194
Xelaev18009859m	AP3D1	521.25	53.651	59.691	57.304	57.304	59.295	58.899	58.899	57.705	58.502
Xelaev18009860m	MOB3A	480.811	50.72	50.72	49.642	52.5	55.311	56.354	53.911	54.262	57.39
Xelaev18009882m	IFI30	732.409	82.262	80.866	81.333	78.986	83.187	80.398	79.929	82.262	83.187
Xelaev18009894m	TPM1	1232.24	238.852	94.438	158.33	120.778	106.487	107.465	114.204	98.524	193.157
Xelaev18009896m	RAB8A	3621.34	421.463	361.741	407.54	382.026	424.227	421.463	410.339	393.441	399.103
Xelaev18009899m	ELAVL1	1624.89	182.635	158.347	186.152	175.508	181.456	182.635	174.308	187.318	196.53
Xelaev18009902m	SAFB2	794.737	89.809	81.513	88.646	88.646	88.646	91.541	89.809	88.062	88.062
Xelaev18009948m	ISYNA1	425.915	46.022	42.003	49.602	48.421	50.48	48.421	50.771	43.567	46.627
Xelaev18009950m	ELL	49.359	5.011	4.653	5.63	5.4	5.819	6.192	5.894	5.246	5.515
Xelaev18009975m	SLC35E1	61.145	7.064	6.647	6.773	6.265	7.352	6.521	6.436	6.981	7.105
Xelaev18009982m	NDUFB6	4572.35	508.109	493.112	489.341	489.341	526.666	526.666	522.971	519.268	496.875
Xelaev18009990m	TXN	21759.7	2325.47	2650.92	2325.47	2429.99	2343.01	2429.99	2377.94	2395.34	2481.62
Xelaev18010008m	HAUS6	286.74	33.316	30.599	30.828	30.828	33.762	31.966	31.284	32.192	31.966
Xelaev18010009m	DENND4C	18.234	2.02	1.965	1.992	2.034	2.075	2.129	1.979	2.034	2.006
Xelaev18010011m	PLIN2	39879.1	4522.84	4459.6	4332.09	4396.02	4427.85	4585.75	4522.84	4332.09	4299.99
Xelaev18010012m	RPS6	6915.89	765.832	708.557	791.255	734.831	806.34	755.56	781.129	781.129	791.255
Xelaev18010021m	NIPSNAP3A	1225.01	137.23	130.232	138.221	131.239	139.21	136.237	137.23	133.245	142.163
Xelaev18010027m	TMEM38B	15.907	1.901	2.019	1.924	1.481	1.744	1.817	1.731	1.645	1.645
Xelaev18010029m	RAD23B	4354.96	487.39	449.157	490.809	473.623	494.219	497.62	483.962	483.962	494.219
Xelaev18010034m	ELAVL2	154.637	21.168	14.649	16.267	16.995	17.116	17.594	17.95	16.022	16.875
Xelaev18010036m	PLAA	1485.61	162.641	155.227	167.521	161.413	168.733	169.943	166.305	166.305	167.521
Xelaev18010037m	IFT74	755.781	81.713	78.662	82.318	85.322	87.105	84.724	87.105	82.318	86.512
Xelaev18010052m	SNAPC3	100.378	10.715	10.858	10.644	11.141	11.631	11.352	11.281	12.184	10.572
Xelaev18010071m	GLDC	1617.3	182.384	169.011	178.41	171.715	183.703	178.41	178.41	185.017	190.244
Xelaev18010078m	RIC1	121.355	13.285	11.754	13.9	12.661	14.161	14.074	14.247	13.549	13.725
Xelaev18010093m	TJP2	627.147	71.675	66.177	72.661	68.692	69.192	70.685	68.192	68.692	71.18
Xelaev18010094m	TJP2	92.354	9.637	9.41	10.233	10.233	10.818	11.106	9.937	10.6	10.38
Xelaev18010101m	SMC5	97.979	9.508	8.494	10.725	10.163	11.665	11.973	11.588	11.433	12.429
Xelaev18010106m	TMEM2	53.652	5.471	5.558	6.325	5.903	6.283	6.533	6.073	5.731	5.774
Xelaev18010108m	ABHD17B	402.529	44.521	41.757	45.884	43.422	45.612	43.698	45.612	44.521	47.502
Xelaev18010116m	ANXA1	7063.88	776.153	781.411	802.283	781.411	791.878	797.088	786.652	765.588	781.411
Xelaev18010117m	ANXA1	8299.72	912.845	1035.47	893.828	931.688	887.449	893.828	893.828	912.845	937.932
Xelaev18010122m	CARNMT1	103.064	10.525	10.525	11.022	10.774	12.076	12.076	11.835	12.395	11.835
Xelaev18010125m	OSTF1	203.327	21.125	21.506	22.009	21.758	22.506	23.121	23.848	23.727	23.727
Xelaev18010137m	PSAT1	2880.82	318.541	306.638	323.261	311.418	327.958	323.261	330.299	320.904	318.541
Xelaev18010147m	MRPS18C	1069.51	117.486	113.351	117.486	119.942	119.126	127.206	119.126	116.663	119.126
Xelaev18010148m	GKAP1	379.329	45.155	38.711	43.057	40.911	44.112	42.258	43.849	40.366	40.911
Xelaev18010149m	UBQLN1	53.297	6.07	5.963	5.818	5.999	5.708	5.927	5.708	5.963	6.142
Xelaev18010151m	HNRNPK	1314.35	151.304	125.932	141.986	141.986	148.222	145.116	150.28	145.116	164.408
Xelaev18010156m	NAA35	378.553	42.573	43.178	40.122	40.739	43.178	42.573	41.353	43.178	41.659
Xelaev18010157m	GOLM1	246.294	28.836	26.092	28.161	27.65	29.504	27.991	27.821	25.387	24.852
Xelaev18010165m	CTSV	1021.58	92.909	99.227	97.665	100.004	106.128	120.083	122.928	132.667	149.967
Xelaev18010167m	FBP1	1585.54	201.067	167.992	178.891	169.217	171.656	161.811	166.763	171.656	196.484
Xelaev18010173m	ABRAXAS1	49.41	5.152	5.081	5.292	5.292	5.5	5.5	5.604	6.011	5.978
Xelaev18010175m	HABP4	20623.8	2304.69	2256.17	2336.8	2463.49	2223.58	2352.79	2304.69	2190.8	2190.8
Xelaev18010200m	AUH	357.568	39.74	40.593	36.255	37.138	41.158	36.55	37.43	45.037	43.667
Xelaev18010210m	TM9SF1	149.985	15.803	15.577	16.804	16.362	16.694	17.023	17.241	16.914	17.567
Xelaev18010214m	RNF31	257.959	28.546	27.468	29.399	28.973	29.612	28.546	29.399	28.116	27.9
Xelaev18010215m	PSME2	359.805	42.294	38.22	40.949	37.667	40.408	39.318	40.408	39.592	40.949
Xelaev18010216m	PSME1	11390.3	1284.55	1239.61	1266.65	1230.55	1275.61	1293.47	1266.65	1248.65	1284.55
Xelaev18010218m	PCK2	7115.85	791.397	768.171	797.165	744.684	797.165	802.917	785.614	808.654	820.084
Xelaev18010226m	PABPN1	233.814	22.232	23.346	22.792	23.53	25.339	24.078	24.802	32.966	34.729
Xelaev18010231m	THTPA	249.117	27.789	26.508	29.946	26.508	28.152	28.694	28.694	25.767	27.059
Xelaev18010239m	MRPL52	41.423	4.671	4.122	4.896	4.355	4.671	4.727	4.868	4.413	4.699
Xelaev18010244m	PRMT5	2948.37	327.378	305.532	332.166	320.152	341.673	327.378	334.551	327.378	332.166
Xelaev18010246m	OXA1L	134.287	14.935	14.191	14.724	14.512	15.979	15.564	14.724	14.512	15.146
Xelaev18010254m	PSMB5	9183.48	1021.09	893.836	1013.28	934.173	1067.53	1036.64	1005.46	1090.52	1120.94
Xelaev18010279m	RAB2B	780.609	88.752	79.948	85.854	82.92	92.186	85.854	88.752	87.017	89.327
Xelaev18010281m	CHD8	120.628	13.658	12.567	14.145	13.066	14.145	13.853	13.461	13.165	12.567
Xelaev18010282m	SUPT16H	1850.9	205.717	186.368	208.632	199.839	215.854	210.084	212.976	205.717	205.717
Xelaev18010298m	SDR39U1	14172.4	1577.6	1470.19	1565.78	1506.26	1601.15	1601.15	1612.88	1601.15	1636.26
Xelaev18010299m	PNP	126.207	17.802	11.554	15.968	13.33	12.594	12.407	13.239	12.501	16.811
Xelaev18010304m	TTC5	340.251	37.901	36.011	37.633	36.825	40.549	38.436	38.436	37.095	37.365
Xelaev18010308m	LPCAT4	62.202	7.358	5.381	6.705	5.848	6.527	6.793	7.143	8.12	8.327
Xelaev18010309m	NOP10	998.401	114.55	93.339	110.2	108.313	113.933	120.647	110.826	110.2	116.394
Xelaev18010314m	APEX1	122.723	12.993	12.79	13.596	13.296	13.992	13.992	13.795	13.497	14.77
Xelaev18010324m	PARP2	81.486	8.594	8.288	9.197	8.837	9.553	9.494	9.316	8.655	9.553
Xelaev18010325m	HNRNPC	780.485	87.152	72.033	83.474	84.707	86.544	87.76	89.572	92.561	96.684
Xelaev18010326m	NDRG2	2899.81	323.352	310.889	313.395	313.395	330.754	318.386	315.894	340.539	333.209
Xelaev18010334m	MORC2	124.501	13.472	11.86	14.352	12.875	14.06	15.12	14.352	13.963	14.448
Xelaev18010336m	SMTN	30.32	3.218	2.478	3.141	2.96	3.319	3.494	3.568	3.691	4.449
Xelaev18010344m	PES1	205.433	31.308	26	27.036	24.42	23.484	20.033	18.454	18.016	16.681
Xelaev18010347m	SF3A1	98.448	10.741	10.363	10.965	10.965	10.965	11.558	11.41	10.59	10.891
Xelaev18010348m	TBC1D10A	188.037	20.728	19.815	21.18	20.121	21.63	21.18	21.927	20.425	21.03
Xelaev18010355m	MTMR3	84.878	9.617	9.077	9.558	9.319	9.912	9.379	9.379	9.498	9.138
Xelaev18010356m	ASCC2	256.365	26.909	27.126	28.418	27.989	29.27	29.693	29.058	28.845	29.058
Xelaev18010363m	THOC5	103.449	11.793	10.167	12.031	11.233	11.793	12.11	12.11	11.714	10.499
Xelaev18010365m	AP1B1	531.05	55.917	53.209	59.027	57.7	62.089	59.906	61.654	59.027	62.522
Xelaev18010383m	SDSL	351.21	104.064	19.662	65.292	34.09	19.31	17.88	18.956	15.668	56.287
Xelaev18010388m	ISCU	1690.73	190.488	190.488	188.026	188.026	192.936	189.259	192.936	183.062	175.508
Xelaev18010392m	CORO1C	3248.01	360.417	344.534	370.873	339.185	357.787	347.199	360.417	386.371	381.229
Xelaev18010403m	GLTP	1050.34	116.18	112.117	120.187	112.117	119.39	118.591	116.986	117.789	116.986
Xelaev18010405m	GIT2	116.87	10.307	10.019	12.443	12.352	13.514	14.127	14.732	14.818	14.56
Xelaev18010406m	ANKRD13A	64.894	6.836	7.212	7.397	7.165	7.397	7.397	7.118	7.489	6.883
Xelaev18010410m	KIAA1671	44.328	4.91	5.03	5.238	4.576	5.238	4.79	5.06	4.515	4.97
Xelaev18010436m	PITPNB	1219.32	135.596	130.866	133.712	134.655	139.335	135.596	131.818	139.335	138.404
Xelaev18010440m	DGCR6	1220.91	151.919	139.68	146.312	140.634	145.371	133.913	131.973	120.123	110.98
Xelaev18010445m	PRKAB1	1164.53	136.464	127.244	131.878	128.175	130.955	132.799	130.03	126.311	120.669
Xelaev18010449m	GCN1	2034.4	226.235	223.046	229.406	224.643	227.823	230.985	230.985	223.046	218.227
Xelaev18010452m	PXN	541.216	59.337	61.431	61.084	61.777	59.337	63.841	56.86	62.123	55.426
Xelaev18010459m	COX6A1	5959.78	670.153	643.484	670.153	647.957	665.736	670.153	700.771	634.502	656.869
Xelaev18010464m	DYNLL2	2209.77	245.599	262.443	232.246	253.441	248.226	240.302	237.631	245.599	244.28
Xelaev18010465m	RNF10	114.508	19.134	18.346	12.403	12.224	13.198	12.58	11.042	8.252	7.329
Xelaev18010467m	MLEC	1182.02	130.39	124.236	130.39	128.644	133.849	136.419	131.258	133.849	132.988
Xelaev18010468m	UNC119B	389.255	43.757	42.24	44.058	41.934	43.455	42.545	43.152	43.455	44.659
Xelaev18010480m	EIF4ENIF1	2157.32	305.939	263.593	227.605	227.605	231.113	218.751	220.531	236.342	225.844
Xelaev18010484m	DEPDC5	39.334	4.337	3.844	4.391	4.148	4.256	4.683	4.813	4.337	4.524
Xelaev18010493m	UPB1	3409.01	373.799	365.292	385.042	368.135	387.835	382.241	390.622	373.799	382.241
Xelaev18010496m	SNRPD3	3525.78	372.842	380.231	375.313	389.974	409.112	399.599	397.204	392.391	409.112
Xelaev18010504m	MED15	131.622	13.457	12.678	16.158	15.338	15.153	14.782	15.521	14.314	14.22
Xelaev18010505m	KLHL22	18.033	1.998	1.948	1.911	1.973	2.073	2.073	2.036	2.023	1.998
Xelaev18010521m	CLTC	174.646	19.765	18.782	20.043	18.07	19.486	19.765	19.205	19.765	19.765
Xelaev18010523m	PI4KAP2	14.533	1.666	1.216	1.617	1.557	1.695	1.772	1.858	1.507	1.646
Xelaev18010529m	SDF2L1	877.442	88.498	89.203	96.805	95.442	98.161	100.848	99.508	102.843	106.134
Xelaev18010536m	PPIL2	880.107	106.385	93.871	106.385	98.802	104.336	99.5	94.581	88.849	87.397
Xelaev18010537m	HIRA	26.375	2.779	2.823	2.955	2.845	2.977	3.021	2.977	3.021	2.977
Xelaev18010538m	MRPL40	4274.19	476.743	440.199	488.619	452.541	488.619	470.75	482.699	470.75	503.268
Xelaev18010539m	UFD1	1702.25	203.876	187.845	195.917	179.652	195.917	186.488	183.764	176.893	191.895
Xelaev18010543m	2019-09-02	344.279	34.082	33.022	36.923	37.68	40.157	39.668	40.887	37.176	44.685
Xelaev18010549m	TXNRD2	2560.09	265.071	258.658	269.313	271.425	294.263	298.343	290.162	310.457	302.401
Xelaev18010551m	COMT	188.563	23.914	18.26	23.635	19.608	20.051	20.198	18.863	19.013	25.02
Xelaev18010554m	TRMT2A	1008.37	112.758	110.362	109.559	107.947	115.925	113.553	113.553	114.346	110.362
Xelaev18010555m	RANBP1	17033.5	1910.99	1869.74	1855.93	1842.07	1924.67	1910.99	1869.74	1924.67	1924.67
Xelaev18010558m	PGAM5	4617.27	530.433	500.603	523.03	485.461	508.116	511.858	500.603	526.736	530.433
Xelaev18010560m	GOLGA3	65.677	7.16	6.624	7.371	6.786	7.318	7.423	7.371	7.94	7.683
Xelaev18010568m	RNF113A	2197.05	219.508	226.539	231.753	240.334	248.789	257.124	253.804	262.071	257.124
Xelaev18010570m	PUS1	1972.06	218.246	210.212	216.647	216.647	224.599	221.43	224.599	218.246	221.43
Xelaev18010590m	BRI3BP	1956.96	220.985	207.427	214.991	201.316	214.991	219.491	217.994	226.931	232.831
Xelaev18010595m	SCARB1	234.926	25.133	25.822	25.133	25.822	27.684	26.165	26.165	25.822	27.181
Xelaev18010598m	NCOR2	4.873	0.52	0.52	0.51	0.542	0.56	0.542	0.56	0.546	0.574
Xelaev18010604m	EIF2B1	120.757	13.096	13.242	13.889	13.242	13.818	13.532	13.532	12.876	13.532
Xelaev18010605m	DDX55	218.489	31.23	28.107	29.37	25.025	24.192	23.009	21.106	18.594	17.855
Xelaev18010609m	KMT5A	190.618	12.547	12.722	18.012	21.046	25.081	26.996	26.11	26.364	21.74
Xelaev18010610m	SBNO1	142.678	15.835	16.269	16.269	16.053	16.91	16.161	16.053	14.733	14.396
Xelaev18010611m	CDK2AP1	2147.86	224.224	193.214	252.352	235.929	253.976	249.094	245.823	240.892	252.352
Xelaev18010616m	VPS37B	499.163	54.995	48.241	56.095	56.095	57.551	56.46	55.362	55.729	58.636
Xelaev18010617m	HIP1R	1363.11	149.889	139.766	150.999	145.421	156.503	154.31	154.31	155.408	156.503
Xelaev18010618m	DENR	14309.6	1594.06	1455.95	1582.72	1571.35	1627.9	1650.32	1627.9	1594.06	1605.36
Xelaev18010623m	CLIP1	1067.27	118.139	113.049	120.652	116.452	123.972	122.317	121.486	116.452	114.755
Xelaev18010626m	VPS33A	520.514	53.464	50.117	60.773	57.154	62.756	61.569	60.374	57.154	57.154
Xelaev18010628m	DIABLO	1993.38	222.624	199.663	227.438	214.52	229.036	230.629	225.838	219.395	224.233
Xelaev18010630m	MLXIP	84.226	9.602	8.413	9.602	9.663	9.785	10.026	9.418	8.858	8.858
Xelaev18010633m	PSMD9	2215.96	241.528	228.92	250.399	243.311	252.16	255.67	259.165	246.863	237.949
Xelaev18010641m	TMEM120B	82.506	9.432	9.045	9.045	9.212	9.322	9.267	9.377	9.267	8.539
Xelaev18010648m	IFT81	82.556	9.418	8.192	9.297	8.688	9.657	9.237	9.597	8.872	9.597
Xelaev18010651m	ATP2A2	2046.02	222.16	207.301	225.412	233.465	230.257	236.658	230.257	228.646	231.863
Xelaev18010652m	ANAPC7	226.31	24.673	22.438	25.513	26.177	26.177	27.325	25.68	23.823	24.504
Xelaev18010661m	ATXN2	818.857	85.81	78.393	89.755	88.447	95.557	98.093	96.828	91.056	94.919
Xelaev18010670m	ERP29	306.375	33.322	32.383	33.322	33.555	35.402	34.713	34.713	34.252	34.713
Xelaev18010671m	NAA25	212.541	25.219	20.645	22.881	21.857	25.219	24.225	23.219	24.058	25.219
Xelaev18010672m	TRAFD1	132.691	15.16	12.823	15.358	13.956	15.061	15.456	15.061	14.361	15.456
Xelaev18010673m	HECTD4	9.734	1.04	1.191	1.1	1.073	1.053	1.113	1.126	1.033	1.006
Xelaev18010675m	RPL6	31180.5	3542.34	3417.38	3492.54	3392.2	3492.54	3442.5	3616.6	3392.2	3392.2
Xelaev18010676m	PTPN11	548.936	61.844	56.316	61.005	59.315	63.923	61.005	61.005	61.844	62.679
Xelaev18010689m	TESC	124.102	13.503	12.648	13.877	13.69	14.156	15.165	14.341	13.314	13.408
Xelaev18010694m	RFC5	2283.4	238.15	226.807	258.495	247.467	262.136	265.76	262.136	260.317	262.136
Xelaev18010713m	TCN2	948.933	103.497	99.624	101.179	105.032	109.592	107.32	111.098	105.032	106.559
Xelaev18010724m	HINT1	51757.4	5766.24	5293.73	5892.86	5510.18	6018.59	5808.55	5934.87	5723.83	5808.55
Xelaev18010728m	SLC12A2	388.906	40.922	41.174	49.576	44.142	45.35	45.59	44.142	38.359	39.651
Xelaev18010730m	PRRC1	1138.09	128.426	118.215	132.984	123.817	132.984	131.167	124.743	120.091	125.667
Xelaev18010734m	LMNB1	594.276	46.237	35.718	46.823	51.961	63.708	76.022	81.175	86.642	105.988
Xelaev18010737m	PHAX	912.12	101.206	94.489	101.943	103.413	105.604	103.413	106.331	95.995	99.726
Xelaev18010738m	ALDH7A1	4938.08	541.955	513.238	558.113	504.924	546.011	521.503	525.617	609.481	617.239
Xelaev18010739m	GRAMD2B	23.46	2.455	2.305	2.529	2.529	2.675	2.96	2.693	2.711	2.602
Xelaev18010744m	PPIC	224.717	24.298	25.729	23.392	24.118	23.574	24.838	25.374	27.136	26.259
Xelaev18010746m	SNX2	392.385	47.667	43.615	41.534	41.534	44.787	44.787	41.234	44.202	43.024
Xelaev18010763m	CDO1	49.996	3.262	3.448	4.598	4.598	5.504	6.174	6.935	7.269	8.209
Xelaev18010764m	TMED7	411.403	45.966	45.966	47.537	42.126	46.281	45.966	47.537	45.966	44.058
Xelaev18010769m	TRIM36	56.179	5.664	5.706	5.582	5.623	6.433	6.314	6.354	7.444	7.06
Xelaev18010772m	DCP2	353.289	39.919	36.147	41.764	37.507	42.025	37.237	40.184	38.853	39.653
Xelaev18010773m	REEP5	11806	1252.05	1364.18	1287.05	1295.73	1313	1347.23	1364.18	1313	1269.61
Xelaev18010775m	APC	17.232	2.187	1.688	1.976	1.73	2.069	1.895	1.936	1.868	1.882
Xelaev18010780m	WDR36	192.586	21.016	17.073	21.601	20.277	23.471	22.326	23.044	21.163	22.614
Xelaev18010781m	SLC25A46	344.915	44.461	40.611	40.088	36.902	36.902	38.24	37.439	35.547	34.725
Xelaev18010783m	MAN2A1	133.054	14.67	13.368	14.99	13.915	15.096	15.729	15.096	14.777	15.413
Xelaev18010794m	PAM	147.731	15.973	16.208	16.208	16.325	17.136	16.79	16.442	16.558	16.091
Xelaev18010800m	CHD1	79.411	7.778	6.706	8.298	8.469	8.469	9.584	9.748	10.557	9.803
Xelaev18010803m	RIOK2	153.532	17.102	15.402	15.402	16.259	17.34	19.325	18.516	18.049	16.138
Xelaev18010809m	CAST	1573.51	191.439	166.777	184.544	170.396	172.789	170.396	170.396	172.789	173.981
Xelaev18010811m	ELL2	294.068	33.76	31.895	32.832	32.13	33.297	33.065	32.832	31.659	32.598
Xelaev18010836m	RASA1	475.719	53.877	50.43	53.118	51.203	53.877	55.009	53.877	51.972	52.355
Xelaev18010842m	Xelaev18010842m	860.591	94.275	87.134	97.202	93.096	100.102	96.034	96.619	100.679	95.449
Xelaev18010853m	Xelaev18010853m	286.439	31.678	34.187	30.984	30.518	30.984	31.447	31.678	32.138	32.825
Xelaev18010860m	AK6	187.901	19.322	18.164	19.75	17.429	19.034	17.133	19.322	28.746	29.001
Xelaev18010862m	OCLN	511.024	47.734	54.609	51.017	55.002	60.012	60.39	61.143	58.106	63.011
Xelaev18010863m	GTF2H2	425.038	40.601	44.217	42.059	45.285	48.442	49.826	50.856	50.856	52.897
Xelaev18010864m	SMN1	708.656	77.988	74.792	77.988	78.516	80.088	79.566	77.46	81.129	81.129
Xelaev18010867m	MCCC2	3558.31	393.844	373.843	399.488	382.462	402.3	396.67	402.3	405.103	402.3
Xelaev18010871m	TNPO1	240.572	26.568	25.241	26.943	25.622	27.875	28.06	26.756	27.317	26.191
Xelaev18010878m	UTP15	67.477	7.066	6.629	7.304	7.209	7.772	7.493	7.864	7.864	8.274
Xelaev18010883m	HEXB	5641.99	628.496	614.641	642.25	605.345	660.436	623.889	628.496	605.345	633.092
Xelaev18010891m	COL4A3BP	519.55	57.474	55.528	56.699	57.474	58.245	59.012	58.245	57.86	59.012
Xelaev18010897m	IQGAP2	117.213	12.509	11.086	13.704	12.322	13.795	14.245	13.704	13.431	12.416
Xelaev18010908m	AGGF1	68.974	6.91	6.599	8.587	7.642	7.684	8.1	8.944	6.822	7.684
Xelaev18010912m	TBCA	9810.68	1048.54	1064.45	1072.38	1040.54	1064.45	1088.16	1024.49	1226.57	1181.12
Xelaev18010913m	AP3B1	184.707	20.255	18.538	20.562	19.946	21.476	21.325	20.716	20.868	21.021
Xelaev18010928m	CCNB1	223.971	9.711	10.238	18.073	19.377	24.356	32.035	35.842	36.376	37.963
Xelaev18010930m	SLC30A5	26.992	2.702	2.547	2.949	2.721	3.336	3.426	3.245	3.08	2.987
Xelaev18010934m	PIK3R1	90.752	10.063	9.931	10.456	9.998	10.651	10.129	10.391	9.599	9.533
Xelaev18010937m	MAST4	34.641	6.262	5.488	5.239	4.203	2.873	2.598	2.567	2.782	2.629
Xelaev18010944m	PPWD1	167.235	18.501	17.448	17.714	17.846	19.79	19.917	19.02	19.02	17.977
Xelaev18010951m	MTREX	679.952	74.468	66.879	76.054	72.333	78.669	78.149	77.104	78.669	77.627
Xelaev18010981m	MRPS30	1859.13	209.996	197.76	199.303	191.543	208.48	209.996	211.508	216.022	214.521
Xelaev18010984m	NNT	2636.12	297.441	282.379	299.569	282.379	291.02	293.166	293.166	295.306	301.693
Xelaev18010985m	PAIP1	614.4	68.001	68.486	68.969	67.516	68.001	70.411	68.486	68.969	65.561
Xelaev18011014m	NIPBL	20.967	2.031	1.657	2.51	2.258	2.586	2.602	2.586	2.258	2.479
Xelaev18011017m	NADK2	107.424	11.956	12.683	11.792	11.956	11.71	12.2	11.874	11.71	11.545
Xelaev18011028m	BRIX1	295.012	42.688	36.48	38.659	34.861	31.951	30.886	29.806	25.31	24.372
Xelaev18011038m	ZFR	343.921	37.513	34.688	39.448	37.791	38.898	39.448	39.721	38.623	37.791
Xelaev18011042m	PDZD2	9.397	1.044	0.973	1.025	1.07	1.114	1.095	1.089	0.973	1.012
Xelaev18011047m	LMAN1	1345.49	147.469	138.397	144.091	144.091	149.706	149.706	144.091	161.808	166.13
Xelaev18011057m	ALPK2	17.916	2.038	1.828	2.092	1.913	2.133	1.927	2.106	1.856	2.024
Xelaev18011058m	NEDD4L	53.173	5.61	5.462	5.647	6.226	6.047	6.368	5.757	6.118	5.938
Xelaev18011060m	ATP8B1	99.712	9.224	9.224	10.403	10.071	10.733	12.102	12.182	13.119	12.653
Xelaev18011061m	NARS	1169.18	130.032	130.032	125.128	126.114	133.914	129.056	126.114	133.914	134.879
Xelaev18011062m	FECH	51.028	5.341	4.916	5.682	5.265	5.943	6.017	6.164	5.869	5.832
Xelaev18011068m	WDR7	20.987	2.416	2.065	2.286	2.228	2.458	2.43	2.444	2.301	2.358
Xelaev18011070m	TXNL1	14438.5	1638.15	1614.8	1661.39	1555.91	1614.8	1579.55	1591.33	1579.55	1603.08
Xelaev18011074m	RAB27B	1305.14	148.005	134.524	147.057	139.392	149.894	148.005	150.836	146.106	141.322
Xelaev18011080m	MBD2	98.644	9.651	10.134	11.54	11.54	10.676	11.277	10.877	11.474	11.474
Xelaev18011095m	ME2	11299.3	1256.68	1189.08	1266.25	1208.52	1275.79	1275.79	1247.1	1285.31	1294.81
Xelaev18011100m	ACAA2	6300.1	716.658	671.56	706.73	681.677	716.658	701.746	716.658	706.73	681.677
Xelaev18011108m	C18ORF32	259.424	26.456	26.629	27.652	35.462	32.694	29.486	28.492	27.143	25.411
Xelaev18011117m	IER3IP1	384.451	42.946	39.823	43.506	41.536	43.227	45.995	40.968	42.666	43.785
Xelaev18011126m	C18ORF25	139.831	15.997	14.656	14.85	15.997	17.119	15.617	15.522	14.266	15.807
Xelaev18011128m	ATP5F1A	6137.97	679.522	684.075	697.648	651.893	688.613	679.522	679.522	679.522	697.648
Xelaev18011159m	UBAP2	666.547	75.821	67.365	77.368	73.217	77.881	76.338	76.338	71.109	71.109
Xelaev18011161m	UBAP1	169.166	19.989	18.174	19.349	17.375	18.569	18.96	18.569	18.96	19.22
Xelaev18011171m	VWA5A	2161.62	236.919	222.559	233.358	240.462	257.918	243.987	257.918	233.358	235.141
Xelaev18011173m	VCP	13209.3	1473.87	1377.52	1431.35	1431.35	1494.95	1484.42	1452.66	1526.38	1536.8
Xelaev18011175m	FANCG	77.188	7.735	7.34	8.884	8.188	9.009	8.821	9.195	8.759	9.257
Xelaev18011176m	2019-03-01	93.46	10.565	10.756	9.663	9.663	10.438	11.071	11.071	10.374	9.859
Xelaev18011177m	STOML2	15880.9	1711.58	1858.65	1754.21	1775.34	1775.34	1764.79	1743.6	1711.58	1785.86
Xelaev18011184m	RECQL4	350.774	39.732	35.041	37.705	35.936	40.591	41.159	41.726	38.578	40.305
Xelaev18011189m	NDUFV3	3999.87	462.965	417.796	440.583	434.115	453.42	462.965	456.61	427.613	443.804
Xelaev18011191m	CBS	834.064	95.185	93.974	88.427	87.801	92.755	84.637	88.427	100.55	102.308
Xelaev18011206m	ATP1A1	493.328	61.64	51.933	56.273	53.92	54.708	53.525	53.525	51.532	56.273
Xelaev18011209m	POGLUT1	316.728	36.537	33.371	36.277	32.566	35.228	35.228	36.277	35.228	36.015
Xelaev18011210m	TIMMDC1	329.27	35.768	31.787	36.806	35.245	38.603	39.111	38.603	37.579	35.768
Xelaev18011216m	GATD3A	3282.17	366.534	342.653	376.965	345.336	376.965	353.339	361.277	382.141	376.965
Xelaev18011222m	PDXK	513.691	57.002	54.56	58.21	52.911	59.409	56.598	57.406	56.598	60.996
Xelaev18011223m	AGPAT3	2117.24	241.321	216.506	232.552	237.825	241.321	234.314	229.016	241.321	243.063
Xelaev18011224m	TRAPPC10	35.328	3.869	3.425	4.037	3.649	4.084	4.108	3.965	4.037	4.155
Xelaev18011248m	HSD3B1	186.279	40.915	12.714	26.052	22.143	13.923	12.539	12.889	12.363	32.743
Xelaev18011255m	CSTB	26657.9	2964.53	3025.84	3005.46	2840.32	2902.7	3005.46	2902.7	3025.84	2985.03
Xelaev18011266m	MAN1A2	80.592	9.055	8.348	9.172	8.821	9.403	9.172	9.114	8.047	9.46
Xelaev18011268m	NDUFB4	10860.2	1189.01	1066.27	1206.18	1214.74	1240.3	1189.01	1265.67	1231.8	1257.23
Xelaev18011281m	ATP6V1A	3928.82	421.816	408.454	415.153	425.133	435.032	421.816	425.133	496.036	480.247
Xelaev18011284m	FAM162A	475.73	55.176	48.783	50.948	49.87	55.176	51.305	56.214	53.43	54.828
Xelaev18011287m	NDC80	207.972	25.036	22.339	24.37	22.339	24.035	23.022	23.022	21.128	22.681
Xelaev18011298m	SPICE1	42.276	3.707	4.296	4.563	4.132	5.126	4.9	5.101	5.201	5.25
Xelaev18011301m	QTRT2	273.25	30.442	28.601	30.442	29.065	31.35	30.67	29.985	30.67	32.025
Xelaev18011316m	UPK1B	182.614	19.48	19.066	20.026	19.753	20.967	20.565	21.1	20.161	21.496
Xelaev18011324m	CREG1	513.629	58.695	51.149	59.062	54.973	60.157	57.958	56.474	56.1	59.062
Xelaev18011330m	GPA33	1469.03	159.019	151.98	163.648	157.854	170.499	165.943	165.943	170.499	163.648
Xelaev18011331m	MAEL	195.962	23.254	20.683	22.833	22.41	22.974	22.41	22.551	19.499	19.349
Xelaev18011359m	GPR89A	113.659	12.735	12.476	12.649	12.649	12.906	12.389	12.562	12.216	13.077
Xelaev18011360m	GTPBP8	518.404	54.792	53.949	61.389	56.049	56.049	58.945	60.171	57.296	59.764
Xelaev18011365m	BCL9	80.785	8.51	7.845	9.616	8.747	9.04	9.214	9.098	9.214	9.502
Xelaev18011391m	ZBTB21	50.351	5.472	5.283	6.022	5.749	5.251	6.052	6.052	5.346	5.124
Xelaev18011419m	FAM3B	250.54	28.36	25.638	29.495	26.622	29.307	27.977	28.74	26.23	28.169
Xelaev18011420m	BACE2	212.244	23.134	21.68	24.562	22.846	23.994	25.825	25.825	22.846	21.533
Xelaev18011432m	WRB	508.437	55.142	52.812	57.061	55.528	59.713	57.061	58.581	53.203	59.336
Xelaev18011433m	HMGN1	4989.99	791.067	468.48	677.183	535.06	503.876	541.193	507.035	471.749	494.342
Xelaev18011435m	PSMG1	1199.66	136.318	123.644	134.394	132.461	140.141	135.357	136.318	128.567	132.461
Xelaev18011445m	DSCR3	408.901	45.556	42.537	44.223	43.214	48.834	45.887	46.547	45.556	46.547
Xelaev18011446m	TTC3	24.968	2.794	2.481	2.776	2.722	2.99	2.901	3.007	2.575	2.722
Xelaev18011447m	PIGP	178.816	18.729	32.521	18.249	20.019	18.49	17.396	17.642	17.642	18.128
Xelaev18011449m	HLCS	579.772	62.739	59.342	63.22	60.319	67.021	66.077	67.491	67.96	65.604
Xelaev18011452m	CHAF1B	1680.84	221.647	219.054	177.386	170.366	182.936	181.554	182.936	173.186	171.778
Xelaev18011453m	MORC3	41.63	4.822	4.375	4.375	4.278	4.947	5.102	4.916	4.408	4.408
Xelaev18011456m	MORC3	18.133	1.979	1.979	1.992	2.053	1.942	2.115	2.029	2.016	2.029
Xelaev18011457m	DOPEY2	100.103	11.016	10.71	11.47	11.016	11.47	11.916	11.319	10.864	10.322
Xelaev18011458m	CBR1	14530.3	1514.52	1743.38	1514.52	1698.53	1595.98	1584.44	1561.26	1630.43	1687.25
Xelaev18011461m	CBR1	6608.14	730.434	684.399	745.511	720.31	740.5	750.509	745.511	735.474	755.493
Xelaev18011465m	CLIC6	160.524	18.387	16.639	17.645	17.645	18.141	18.264	18.264	17.52	18.017
Xelaev18011474m	ATP5PO	49883.7	5406.33	5814.5	5364.95	5774.12	5488.76	5488.76	5406.33	5406.33	5733.64
Xelaev18011477m	CRYZL1	5978.61	675.311	650.566	655.539	635.569	675.311	665.449	655.539	690.014	675.311
Xelaev18011478m	DONSON	236.481	20.951	21.775	23.193	23.989	27.273	29.508	28.77	30.057	30.965
Xelaev18011480m	SON	237.448	26.266	23.36	26.833	26.076	27.396	27.209	27.396	26.266	26.645
Xelaev18011481m	PATL2	1208.11	352.317	301.472	167.245	102.824	70.231	58.358	55.622	51.44	48.595
Xelaev18011482m	GART	15799.4	1768.54	1716.37	1755.54	1716.37	1768.54	1768.54	1742.52	1794.42	1768.54
Xelaev18011498m	PAXBP1	48.819	4.306	3.458	5.034	4.638	5.593	6.597	6.301	6.035	6.857
Xelaev18011499m	SYNJ1	54.449	5.753	5.316	6.307	6.011	6.265	6.516	6.432	5.968	5.882
Xelaev18011500m	CFAP298	149.893	17.2	15.347	17.389	16.14	18.23	17.859	16.237	15.746	15.746
Xelaev18011503m	URB1	169.233	16.944	14.882	19.478	18.786	20.434	20.569	20.434	18.366	19.34
Xelaev18011510m	SOD1	23361.7	2484.06	2594.36	2502.59	2630.67	2557.82	2756.09	2576.12	2720.51	2539.47
Xelaev18011513m	TIAM1	46.518	5.075	5.045	5.136	5.196	4.86	5.227	5.166	5.376	5.436
Xelaev18011525m	CCT8	31227.8	3360.61	3586.31	3511.68	3436.46	3436.46	3436.46	3436.46	3511.68	3511.68
Xelaev18011526m	USP16	280.032	30.94	29.077	31.4	30.246	31.4	32.087	32.542	31.63	30.709
Xelaev18011528m	TMEM97	1452.48	172.086	130.642	172.086	152.365	168.85	163.413	163.413	149.003	180.624
Xelaev18011529m	LTN1	449.043	50.476	47.492	51.214	48.618	51.581	51.581	50.845	48.618	48.618
Xelaev18011534m	GABPA	80.337	9.252	8.369	8.369	8.961	9.078	9.252	9.252	8.961	8.843
Xelaev18011535m	ATP5J	21213.1	2234.71	2562.88	2284.94	2690.14	2201.01	2318.21	2351.33	2268.24	2301.6
Xelaev18011539m	MRPL39	4756.72	542.184	511.38	538.368	511.38	545.991	530.706	526.861	519.141	530.706
Xelaev18011545m	CPOX	600.975	67.633	69.059	65.231	64.261	68.585	64.747	66.196	67.155	68.109
Xelaev18011548m	RIOX2	275.901	30.325	27.89	30.761	31.41	31.626	31.84	32.055	29.668	30.325
Xelaev18011552m	ARL6	235.601	26.276	25.365	23.692	24.255	26.276	26.637	26.095	28.764	28.238
Xelaev18011566m	CHMP2B	2804.66	332.06	314.644	302.813	300.824	304.798	345.353	312.685	306.778	284.705
Xelaev18011569m	GBE1	5901.45	644.957	615.116	640.016	640.016	679.205	635.062	659.706	684.05	703.32
Xelaev18011589m	CXADR	2024.2	221.363	193.317	235.702	218.131	240.413	238.847	245.092	209.977	221.363
Xelaev18011591m	ST3GAL6	175.644	18.679	18.159	19.451	20.466	20.466	20.842	19.195	18.679	19.706
Xelaev18011598m	ZP4	246.107	23.841	24.485	28.242	24.698	32.426	25.546	25.757	30.854	30.258
Xelaev18011600m	CMSS1	393.63	41.564	36.082	42.567	41.564	45.207	45.86	44.552	46.834	49.401
Xelaev18011602m	TBC1D23	188.705	20.525	19.777	19.475	20.673	20.821	19.927	20.525	24.128	22.855
Xelaev18011606m	HIST1H2AA	1762.75	201.786	193.584	199.459	181.564	201.786	190.017	194.766	188.821	210.966
Xelaev18011610m	FANCB	152.589	15.423	13.739	17.046	16.054	18.139	17.898	18.379	17.413	18.498
Xelaev18011616m	PIR	170.69	19.03	18.751	17.908	18.331	19.03	19.445	18.891	19.307	19.995
Xelaev18011617m	CTPS2	874.362	99.584	92.273	98.135	92.273	101.025	98.86	97.409	95.218	99.584
Xelaev18011629m	AKAP10	93.718	10.483	8.663	10.554	10.199	10.905	10.835	10.694	10.341	11.044
Xelaev18011636m	SHPK	223.15	26.091	21.457	25.744	22.371	25.57	25.046	24.518	25.917	26.436
Xelaev18011645m	TBL2	151.322	16.433	15.45	16.755	15.45	16.862	16.968	17.074	19.043	17.286
Xelaev18011649m	CENPV	27.248	6.639	2.103	4.217	3.285	2.196	1.79	1.984	1.936	3.098
Xelaev18011652m	NCOR1	61.989	6.989	6.104	7.037	6.254	7.133	7.606	7.276	6.795	6.795
Xelaev18011658m	SPECC1	52.002	5.676	5.261	5.676	5.552	6.04	5.96	5.798	6.04	6
Xelaev18011659m	ABR	67.455	7.44	6.738	7.547	7.119	7.6	7.334	7.173	8.227	8.279
Xelaev18011668m	CPD	1060.36	118.155	110.23	120.759	115.532	125.915	125.915	121.623	112.891	109.339
Xelaev18011670m	SSH2	20.112	1.766	1.766	1.973	2.02	2.339	2.457	2.501	2.717	2.574
Xelaev18011671m	NSRP1	983.074	109.737	92.337	109.737	105.881	115.799	115.048	112.783	108.97	112.783
Xelaev18011675m	BLMH	457.783	52.614	47.694	51.645	49.355	50.014	49.355	54.213	48.361	54.531
Xelaev18011679m	GIT1	171.761	15.88	18.166	20.581	19.025	19.025	21.05	20.107	18.781	19.146
Xelaev18011680m	NUFIP2	311.611	36.211	34.864	36.877	34.181	34.637	35.315	34.637	33.262	31.626
Xelaev18011685m	MYO18A	142.5	16.061	15.487	16.061	15.001	14.308	15.099	15.583	15.583	19.316
Xelaev18011686m	PIPOX	292.096	32.752	31.301	33.231	31.057	32.992	32.752	32.271	32.271	33.47
Xelaev18011690m	DHRS13	1707.25	194.588	189.091	193.219	183.537	190.471	190.471	186.321	191.847	187.708
Xelaev18011693m	FLOT2	366.104	56.862	42.326	39.678	40.214	33.235	34.396	33.235	34.396	51.761
Xelaev18011699m	UNC119	332.464	39.826	36.003	37.802	36.262	38.818	36.52	35.484	35.744	36.003
Xelaev18011700m	PIGS	1781.09	207.339	189.978	200.168	191.445	201.61	197.275	198.724	195.823	198.724
Xelaev18011701m	ALDOC	36489.6	4022.63	3846.92	4138.09	3964.4	4109.35	4109.35	4080.52	4051.61	4166.76
Xelaev18011702m	SPAG5	659.036	80.273	73.774	79.737	77.044	73.774	73.774	71.015	65.964	63.681
Xelaev18011704m	KIAA0100	112.853	11.826	12.009	12.642	12.1	12.998	13.175	12.998	12.642	12.462
Xelaev18011706m	SUPT6H	63.247	6.839	6.421	7.125	6.921	7.327	7.447	7.327	6.88	6.962
Xelaev18011708m	APRT	1059.61	116.202	115.332	116.202	114.458	119.663	116.202	120.522	117.937	123.087
Xelaev18011715m	VTN	19070	2077.02	2013.21	2045.2	2124.46	2218.29	2140.19	2202.74	2108.68	2140.19
Xelaev18011717m	TMEM199	1327.88	146.126	138.421	147.217	151.554	152.632	156.921	151.554	145.033	138.421
Xelaev18011718m	POLDIP2	306.659	33.997	33.025	33.025	33.269	34.96	35.915	34.72	34.479	33.269
Xelaev18011719m	TSR1	1884.6	212.332	212.332	208.177	209.566	212.332	212.332	208.177	206.783	202.573
Xelaev18011720m	SRR	411.383	43.569	41.917	45.202	43.897	51.249	49.049	49.365	42.91	44.224
Xelaev18011721m	SMG6	21.907	1.924	1.719	2.141	2.176	2.402	2.754	2.948	2.704	3.139
Xelaev18011727m	DPH1	614.615	69.774	62.081	70.78	66.218	70.278	71.781	71.781	66.73	65.192
Xelaev18011729m	RPA1	5558.73	612.752	581.063	612.752	608.262	630.594	630.594	648.256	617.23	617.23
Xelaev18011730m	SMYD4	39.15	4.15	4.952	4.15	4.482	4.362	4.272	4.15	4.272	4.362
Xelaev18011732m	SERPINF2	68.015	7.202	6.552	7.574	7.149	7.783	7.836	8.25	7.626	8.043
Xelaev18011733m	WDR81	175.479	19.836	18.091	19.836	19.115	20.121	19.692	19.836	19.548	19.404
Xelaev18011739m	PNPLA4	271.479	28.563	24.539	29.432	29.862	32.824	30.931	32.197	31.566	31.566
Xelaev18011742m	PUDP	3993.64	450.347	434.704	447.235	428.386	456.545	450.347	440.987	437.85	447.235
Xelaev18011750m	ARSD	2717.51	303.94	299.463	301.704	292.704	303.94	303.94	303.94	306.171	301.704
Xelaev18011753m	CD99	287.774	42.753	29.115	39.935	34.594	29.679	28.165	28.546	27.589	27.397
Xelaev18011757m	DHRSX	191.217	21.973	23.285	21.167	20.346	20.759	20.069	20.895	20.484	22.239
Xelaev18011764m	ASMTL	1905.45	208.043	198.845	214.09	208.043	220.074	215.592	215.592	212.585	212.585
Xelaev18011786m	PRDX4	103.971	13.655	9.327	13.312	11.265	10.31	10.607	10.68	12.477	12.337
Xelaev18011792m	BUD23	81.583	15.222	14.042	12.1	8.578	7.35	6.335	6.126	6.056	5.773
Xelaev18011797m	MKS1	62.807	9.491	7.467	7.343	6.455	6.883	6.282	6.412	6.019	6.455
Xelaev18011799m	FKBP6	1090.35	133.226	118.496	123.755	121.134	128.086	123.755	125.493	110.471	105.935
Xelaev18011800m	BAZ1B	105.024	11.494	10.951	12.251	11.417	12.176	12.176	11.494	11.571	11.494
Xelaev18011801m	NSUN5	210.91	24.087	21.838	24.257	22.885	24.597	24.427	23.746	22.885	22.188
Xelaev18011809m	METTL27	558.785	60.765	61.194	59.04	59.473	62.049	65.016	63.749	64.172	63.326
Xelaev18011813m	ABHD11	217.305	23.749	21.551	24.906	22.743	25.234	25.234	25.397	23.749	24.742
Xelaev18011833m	ARSD	135.907	13.894	14.232	14.344	14.678	16.854	15.995	15.451	15.56	14.9
Xelaev18011836m	APOO	7633.37	847.62	791.608	847.62	841.462	872.102	859.892	896.348	829.097	847.62
Xelaev18011839m	PDHA1	17461.6	1742.78	1918.41	1903.99	1903.99	2004.16	2004.16	1989.96	1989.96	2004.16
Xelaev18011842m	MAP3K15	104.885	11.515	10.186	11.361	11.897	11.668	12.199	12.649	11.438	11.973
Xelaev18011847m	RPS6KA3	1338.91	148.206	157.681	146.074	152.44	151.385	145.004	138.53	151.385	148.206
Xelaev18011854m	SMS	51.166	6.963	4.542	6.037	5.648	5.324	4.656	4.694	6.037	7.264
Xelaev18011873m	AIFM3	406.216	44.603	49.101	45.58	43.289	45.904	45.904	43.289	44.929	43.619
Xelaev18011875m	ATP5F1	17845.1	1916.69	2094.19	1961.55	1976.43	1916.69	1991.28	2035.59	1946.64	2006.08
Xelaev18011881m	PITPNA	345.646	36.958	37.459	38.699	36.958	40.89	37.708	35.439	40.165	41.371
Xelaev18011885m	MYO1C	177.898	27.882	16.186	22.264	19.229	16.611	18.687	16.47	18.823	21.746
Xelaev18011888m	CRK	704.436	77.783	75.532	76.66	77.222	81.672	78.901	80.567	75.532	80.567
Xelaev18011896m	CUX1	51.004	5.436	5.141	5.582	5.509	6.187	6.046	5.762	5.436	5.905
Xelaev18011904m	IFT22	1293.15	139.256	139.256	143.274	150.225	149.238	144.273	153.174	134.184	140.264
Xelaev18011909m	PRKRIP1	1347.17	150.411	142.247	148.386	147.37	152.425	160.381	159.395	144.305	142.247
Xelaev18011911m	IFT20	120.521	13.042	13.377	12.366	12.536	13.956	14.12	13.956	13.543	13.626
Xelaev18011916m	METTL16	282.352	27.193	25.152	28.196	28.196	31.381	33.291	34.701	35.863	38.378
Xelaev18011918m	CLUH	1045.97	114.812	106.982	117.383	113.951	121.626	118.235	119.935	114.812	118.235
Xelaev18011926m	NCBP3	85.065	9.217	8.361	9.811	9.097	9.87	9.928	9.87	9.634	9.277
Xelaev18011946m	C6ORF132	123.995	13.306	12.472	13.819	13.203	14.829	15.128	14.729	13.306	13.203
Xelaev18011953m	HSD11B1	379.011	45.965	37.329	41.323	44.891	37.91	43.806	44.35	39.632	43.806
Xelaev18011978m	RPLP2	65635.3	7498.31	7127.88	7445.77	7181.18	7498.31	7287.4	7287.4	7181.18	7127.88
Xelaev18011990m	CRY1	409.477	43.096	38.016	47.655	43.428	47.655	47.335	45.396	47.335	49.562
Xelaev18012000m	CSDE1	2391.65	266.446	243.122	268.355	256.821	279.713	274.055	272.16	264.531	266.446
Xelaev18012002m	NRAS	660.67	69.919	72.148	75.649	75.216	73.03	76.513	72.59	71.26	74.345
Xelaev18012007m	TRIM33	88.065	9.645	8.388	11.701	9.645	9.782	10.188	10.322	9.232	9.163
Xelaev18012020m	ADPRHL2	2876.49	312.983	293.994	333.903	301.161	326.979	320.006	305.908	338.493	343.062
Xelaev18012025m	MAP7D1	133.942	15.706	14.549	14.938	14.646	14.353	16.46	16.179	14.156	12.954
Xelaev18012040m	MYCBP	2769.24	348.196	270.075	306.779	277.602	351.538	283.182	310.331	286.873	334.669
Xelaev18012046m	UTP11	199.028	23.864	22.632	22.354	21.229	22.215	22.632	21.654	21.935	20.514
Xelaev18012050m	RPA2	2110.34	245.473	259.986	228.829	221.313	226.957	217.527	217.527	252.761	239.964
Xelaev18012051m	EYA3	304.003	33.393	30.439	33.616	29.508	36.899	36.684	36.684	34.061	32.72
Xelaev18012059m	SNRNP40	633.918	66.956	58.313	62.942	61.413	73.302	74.738	70.886	79.923	85.445
Xelaev18012060m	ZCCHC17	286.702	34.838	30.465	34.838	29.589	34.347	32.181	30.465	27.799	32.181
Xelaev18012070m	CTPS1	962.853	109.153	100.124	104.67	103.162	109.153	109.153	107.665	107.665	112.108
Xelaev18012073m	RCC1	560.482	50.11	48.203	55.21	53.839	61.87	64.453	70.735	70.324	85.738
Xelaev18012082m	YTHDF2	258.145	33.378	26.962	28.87	28.238	29.288	29.079	29.912	26.101	26.317
Xelaev18012089m	PHACTR4	276.335	28.414	27.727	28.868	28.186	32.199	32.633	31.324	32.633	34.351
Xelaev18012091m	MED18	279.547	30.181	28.439	29.604	30.754	32.83	30.564	32.643	31.703	32.83
Xelaev18012092m	SESN2	335.421	36.207	37.216	36.965	36.46	38.465	38.216	38.465	36.965	36.46
Xelaev18012097m	WASF2	320.382	35.171	31.113	36.163	34.171	36.655	37.146	35.916	37.146	36.901
Xelaev18012098m	WDTC1	154.367	16.249	15.814	17.217	16.681	17.958	17.853	18.377	17.536	16.681
Xelaev18012104m	KDF1	60.526	6.442	6.037	7.359	6.796	7.53	7.742	7.7	5.483	5.437
Xelaev18012105m	NUDC	1789.06	194.814	189.219	197.589	192.024	200.349	205.825	204.461	207.186	197.589
Xelaev18012108m	ARID1A	308.476	32.58	31.804	34.114	33.605	35.877	35.877	35.125	34.621	34.873
Xelaev18012109m	RPS6KA1	740.129	83.481	74.894	81.666	84.084	89.447	84.685	85.883	77.995	77.995
Xelaev18012110m	HMGN2	12091	2716.47	823.715	1963.35	1264.45	950.084	931.194	1014.82	950.084	1476.88
Xelaev18012116m	CEP85	203.184	18.837	19.356	20.718	21.554	23.682	24.325	24.644	24.004	26.064
Xelaev18012118m	CISD3	13328.1	1428.96	1374.21	1472.28	1407.14	1461.49	1483.05	1472.28	1724.21	1504.5
Xelaev18012129m	CNKSR1	55.477	6.101	5.522	6.423	5.896	6.621	6.582	6.621	5.896	5.814
Xelaev18012140m	SLC30A2	233.802	24.104	24.295	24.295	25.244	26.369	29.482	28.213	26.555	25.244
Xelaev18012144m	PAFAH2	84.114	9.011	8.328	8.702	9.497	10.856	10.154	9.976	8.888	8.702
Xelaev18012146m	STMN1	32119.6	3535.93	3514.35	3470.98	3790.1	3642.89	3934.56	3427.35	3852.34	2951.12
Xelaev18012148m	ABHD10	2922.93	335.766	305.68	331.205	319.697	342.564	322.011	322.011	317.377	326.62
Xelaev18012161m	TADA2A	36.464	3.862	3.837	4.21	4.012	4.283	4.356	4.283	3.912	3.71
Xelaev18012172m	TUBA1A	7060.81	787.268	706.633	792.915	764.535	820.945	792.915	792.915	792.915	809.774
Xelaev18012175m	IPO9	1079.51	119.558	119.558	121.342	115.964	124.003	120.451	124.003	116.866	117.765
Xelaev18012188m	PARL	350.522	38.669	38.106	37.823	38.106	39.788	40.067	40.067	39.509	38.388
Xelaev18012193m	SARS	3069.31	337.854	315.348	350.114	327.924	337.854	347.675	335.382	352.547	364.616
Xelaev18012218m	NUCKS1	1580.07	168.669	139.033	170.939	160.615	178.785	187.573	192.976	182.102	199.374
Xelaev18012233m	ZNHIT3	716.75	79.147	72.191	83.302	77.565	81.236	77.565	79.671	84.838	81.236
Xelaev18012237m	RNPEP	2398.79	276.261	258.303	268.325	260.317	270.316	274.284	264.33	262.326	264.33
Xelaev18012267m	ANKS1A	26.995	2.768	3.063	3.063	3.081	3.026	2.935	3.117	2.935	3.008
Xelaev18012274m	RPS10	27091.9	2987.33	3367.8	3030.42	2944.03	2987.33	3030.42	2987.33	2900.5	2856.73
Xelaev18012283m	CSRP1	70.322	16.045	4.104	9.783	7.616	5.11	5.11	5.709	4.616	12.229
Xelaev18012297m	PPIL1	2328.62	268.501	246.408	261.214	253.85	266.686	259.38	263.042	251.997	257.542
Xelaev18012307m	SARG	323.051	32.165	30.229	34.062	33.254	36.185	39.036	38.523	39.036	40.561
Xelaev18012308m	YOD1	1401.37	157.341	147.219	161.765	151.747	160.663	158.451	157.341	150.62	156.228
Xelaev18012309m	PFKFB2	200.125	20.87	19.747	22.127	21.816	23.206	23.663	23.359	22.283	23.053
Xelaev18012313m	C4BPA	85.197	9.056	8.708	9.673	9.332	9.943	9.263	9.673	10.01	9.537
Xelaev18012318m	CD55	141.879	15.819	17.133	15.148	16.371	16.151	15.93	15.596	14.696	15.036
Xelaev18012321m	AP4B1	64.131	6.551	6.228	7.079	6.816	7.492	7.543	7.645	7.131	7.645
Xelaev18012341m	SLC16A1	1826.68	119.352	103.842	133.992	138.711	179.782	228.281	270.174	283.864	368.688
Xelaev18012344m	MOV10	3044.22	354.143	326.519	336.651	336.651	351.662	344.184	354.143	321.414	318.851
Xelaev18012347m	CAPZA1	5852.09	650.291	655.06	626.262	626.262	664.563	659.817	640.717	659.817	669.296
Xelaev18012356m	DDX20	1423.36	161.98	146.445	161.98	153.678	161.98	159.622	160.802	158.439	158.439
Xelaev18012378m	DYNLT3	104.962	11.521	11.84	11.199	11.601	11.681	11.999	11.441	11.92	11.761
Xelaev18012393m	ATP6AP2	972.793	109.84	94.302	114.354	109.84	112.105	112.105	114.354	102.947	102.947
Xelaev18012394m	CXORF38	222.153	24.85	22.847	25.209	24.85	24.67	26.453	25.745	23.946	23.582
Xelaev18012395m	MED14	90.729	8.937	8.872	10.208	9.515	10.641	10.886	10.947	10.145	10.579
Xelaev18012398m	USP9X	180.513	19.978	18.48	20.421	19.533	20.714	20.273	20.567	20.126	20.421
Xelaev18012403m	DDX3X	1192.41	131.932	121.904	136.384	130.134	136.384	137.267	138.148	128.324	131.932
Xelaev18012410m	MAOA	35.507	4.388	4.363	3.949	3.602	4.027	3.896	3.869	3.412	4.001
Xelaev18012420m	FUNDC1	152.1	18.814	14.472	17.077	17.17	16.037	16.796	16.418	16.323	18.993
Xelaev18012427m	SLC19A2	548.139	69.802	63.685	65.502	60	58.131	58.131	57.001	58.507	57.379
Xelaev18012431m	NME7	209.063	21.502	20.158	22.82	21.649	22.674	21.057	21.057	24.965	33.182
Xelaev18012432m	ATP1B1	550.3	99.85	65.955	81.832	67.958	43.568	44.033	46.332	39.302	61.471
Xelaev18012453m	PSMB2	3114.57	346.092	338.85	353.273	331.545	346.092	343.685	353.273	353.273	348.492
Xelaev18012457m	KIAA0319L	93.051	9.684	8.843	10.577	9.684	10.577	10.942	10.208	11.232	11.304
Xelaev18012458m	ZMYM4	110.67	12.266	10.252	11.963	11.428	13.602	13.161	12.939	12.642	12.417
Xelaev18012461m	SFPQ	74.188	8.396	6.486	8.15	7.776	8.641	8.701	8.883	8.212	8.943
Xelaev18012463m	TMEM35B	638.45	72.628	68.524	74.87	69.444	71.27	73.528	74.87	64.795	68.524
Xelaev18012475m	HNRNPR	485.6	53.492	49.852	51.32	54.921	54.921	54.208	55.276	56.335	55.276
Xelaev18012476m	ATP5IF1	68496.1	7104.11	6934.81	7216.15	8356.95	7767.1	7712.67	7658.1	7548.51	8197.64
Xelaev18012483m	MECR	1942.72	213.579	211.991	215.163	210.4	221.461	219.892	216.743	216.743	216.743
Xelaev18012485m	SRSF4	202.108	22.963	21.663	21.827	21.499	23.285	22.316	23.605	21.827	23.124
Xelaev18012492m	STX12	2930.69	319.365	297.646	328.859	316.977	335.919	333.571	335.919	328.859	333.571
Xelaev18012493m	YRDC	518.169	54.913	53.365	57.972	56.066	58.35	61.729	60.609	55.683	59.483
Xelaev18012497m	SF3A3	802.818	84.576	80.844	84.576	85.806	92.463	89.46	96.609	92.463	96.021
Xelaev18012510m	GNL2	322.467	48.889	43.776	40.409	33.235	32.119	32.119	32.568	27.458	31.894
Xelaev18012512m	LSM10	122.686	13.694	12.836	13.694	12.662	13.438	13.863	13.181	14.201	15.117
Xelaev18012521m	Xelaev18012521m	2001.29	213.903	207.154	215.58	222.249	225.559	235.402	232.136	235.402	213.903
Xelaev18012530m	OSCP1	316.205	34.885	32.296	35.14	35.14	36.409	36.156	34.629	35.14	36.409
Xelaev18012531m	MRPS15	2547.59	282.876	274.778	290.888	282.876	286.892	296.843	280.86	278.838	272.74
Xelaev18012535m	BSDC1	526.342	57.848	52.692	60.369	55.289	59.952	62.445	60.786	57.848	59.113
Xelaev18012536m	MARCKSL1	2117.68	176.624	180.18	209.251	205.929	228.711	256.587	265.577	290.344	304.476
Xelaev18012537m	HDAC1	2414.45	257.778	239.886	261.694	259.738	279.073	277.161	280.98	277.161	280.98
Xelaev18012538m	TOR2A	443.902	47.071	54.776	46.728	47.071	50.128	47.414	49.453	51.134	50.128
Xelaev18012542m	EIF3I	6114.28	669.764	679.971	674.874	659.507	690.129	685.056	664.642	705.278	685.056
Xelaev18012547m	KPNA6	3293.65	351.226	345.62	362.349	354.017	373.359	370.617	376.094	381.546	378.823
Xelaev18012548m	TXLNA	748.863	78.89	83.109	81.54	84.148	86.716	81.54	84.664	81.54	86.716
Xelaev18012550m	IQCC	231.736	27.608	26.918	25.522	24.103	26.397	26.397	25.873	24.281	24.638
Xelaev18012563m	SMAP2	230.899	18.651	21.004	21.704	23.584	24.911	28.106	28.571	32.919	31.449
Xelaev18012573m	KDM1A	87.691	10.597	8.561	9.099	9.299	9.628	9.563	9.431	10.851	10.661
Xelaev18012575m	TMEM30B	235.752	25.283	21.339	27.348	26.494	28.695	27.687	28.862	24.934	25.109
Xelaev18012579m	ZMPSTE24	2412.72	268.271	261.029	263.937	261.029	275.419	268.271	269.708	265.386	279.664
Xelaev18012588m	MTFR1L	320.339	32.512	32.039	36.64	35.062	37.085	36.192	36.64	37.307	36.863
Xelaev18012597m	MGST3	8862.34	1038.99	933.994	983.458	926.856	1018.29	955.297	955.297	997.438	1052.72
Xelaev18012600m	SRRM1	90.614	9.628	8.257	9.838	9.344	9.768	10.325	9.628	11.879	11.946
Xelaev18012601m	CLIC4	469.288	51.222	44.951	54.937	50.881	51.904	53.932	53.932	53.596	53.932
Xelaev18012607m	Xelaev18012607m	210.999	22.674	21.631	24.381	22.847	23.703	25.721	25.388	22.847	21.806
Xelaev18012608m	YARS	4982.11	554.515	530.345	558.507	534.4	574.373	550.513	562.488	550.513	566.46
Xelaev18012613m	ZBTB8OS	2071.32	230.772	208.819	224.101	224.101	242.285	232.429	232.429	240.652	235.731
Xelaev18012617m	AK2	4244.34	468.048	461.371	461.371	461.371	491.124	458.018	447.899	484.576	510.561
Xelaev18012619m	NDUFS5	22658.9	2414.89	2871.77	2433.69	2508.43	2433.69	2508.43	2471.16	2527	2489.82
Xelaev18012621m	MACF1	50.722	5.923	4.955	5.963	5.509	5.84	5.758	5.799	5.425	5.55
Xelaev18012624m	FUCA1	2341.88	272.166	252.042	263.089	255.743	266.733	252.042	253.895	261.259	264.913
Xelaev18012625m	GALE	1609.59	177.593	183.904	182.649	173.766	175.045	178.862	173.766	186.405	177.593
Xelaev18012626m	LYPLA2	8271.29	953.752	1012.05	887.488	907.541	927.443	860.503	887.488	914.192	920.826
Xelaev18012627m	PITHD1	3020.21	342.108	346.948	329.901	317.532	344.531	337.244	337.244	334.802	329.901
Xelaev18012630m	EEF1A1	6069.01	651.314	651.314	651.314	685.09	680.307	694.618	665.874	704.093	685.09
Xelaev18012631m	PPT1	518.431	58.368	57.965	57.155	56.341	57.965	58.77	57.155	56.748	57.965
Xelaev18012632m	CAP1	14893.8	1643.87	1618.81	1618.81	1618.81	1681.21	1681.21	1643.87	1681.21	1705.96
Xelaev18012635m	TRIT1	251.178	27.357	26.727	27.565	27.565	28.395	29.421	28.602	28.189	27.357
Xelaev18012641m	PPIE	2813.31	310.35	296.514	308.06	303.46	321.716	314.914	310.35	323.972	323.972
Xelaev18012645m	CLTC	738.176	81.836	77.634	83.021	78.239	83.612	82.429	81.836	83.612	85.958
Xelaev18012646m	PTRH2	2012.59	222.482	201.17	224.09	209.46	230.481	224.09	227.294	228.889	244.631
Xelaev18012649m	TUBD1	188.851	19.867	17.139	20.336	19.395	21.878	22.485	22.334	22.03	23.387
Xelaev18012650m	RPS6KB1	2269.14	264.984	245.991	238.253	249.829	247.912	259.336	255.548	251.74	255.548
Xelaev18012655m	BRIP1	42.196	4.172	4.208	4.519	4.45	4.89	4.989	4.956	4.956	5.055
Xelaev18012662m	BCAS3	94.764	11.759	10.541	10.074	10.152	10.773	10.464	10.541	10.464	9.995
Xelaev18012670m	ALDH3A2	1113.73	123.975	121.53	121.53	118.237	124.785	121.53	123.975	120.71	137.454
Xelaev18012683m	TAF15	2061.82	216.316	187.662	222.827	217.952	238.77	241.906	255.813	232.448	248.126
Xelaev18012684m	RHBDD2	434.22	45.729	42.345	50.014	49.689	49.362	49.036	47.721	52.274	48.051
Xelaev18012685m	POR	332.919	36.426	32.247	37.44	34.363	36.934	38.443	38.692	38.94	39.435
Xelaev18012686m	TMEM120A	575.862	62.109	60.755	64.782	63.896	63.896	67.415	65.665	63.005	64.34
Xelaev18012689m	MDH2	49785.9	5430.38	5430.38	5513.62	5430.38	5513.62	5555.09	5555.09	5596.45	5760.94
Xelaev18012698m	DTX2	115.754	12.966	11.326	12.427	12.698	13.85	13.499	13.056	12.966	12.966
Xelaev18012702m	SYAP1	1303.13	145.868	133.21	144.829	137.476	149.999	146.905	146.905	147.939	149.999
Xelaev18012705m	TXLNG	36.271	3.958	3.551	4.248	4.038	4.248	4.301	4.064	3.958	3.904
Xelaev18012706m	RBBP7	170.431	22.305	27.704	19.645	20.014	16.224	17.13	17.258	13.409	16.743
Xelaev18012718m	SMG8	185.138	20.535	18.124	20.975	20.239	21.992	22.136	21.703	19.643	19.792
Xelaev18012721m	SKA2	1054.51	115.593	113.294	117.116	109.424	121.641	118.631	117.874	126.105	114.828
Xelaev18012724m	PPM1E	746.582	76.757	82.02	83.75	82.02	82.02	90.56	86.608	84.324	78.524
Xelaev18012725m	RAD51C	180.264	17.129	29.657	17.129	20.638	20.227	18.838	18.557	18.274	19.814
Xelaev18012735m	VPS53	108.337	13.125	11.209	11.476	11.741	12.784	12.526	12.612	11.209	11.653
Xelaev18012740m	MRM3	81.276	8.867	9.419	9.297	9.175	9.052	9.114	8.991	8.743	8.618
Xelaev18012741m	GLOD4	5319.15	597.505	576.627	597.505	580.826	601.646	597.505	593.353	593.353	580.826
Xelaev18012743m	GEMIN4	1069.02	119.087	113.681	120.872	114.588	120.872	120.872	120.872	119.087	119.087
Xelaev18012760m	ASL	13588.6	1501.18	1455.92	1534.83	1467.28	1512.42	1534.83	1523.64	1534.83	1523.64
Xelaev18012761m	GUSB	1087.36	123.095	110.238	123.095	118.009	125.611	121.408	123.095	119.713	123.095
Xelaev18012764m	RMC1	255.453	28.422	25.372	30.597	28.422	28.622	29.812	30.792	26.809	26.605
Xelaev18012766m	CHCHD2	1924.11	208.006	187.363	221.937	209.568	228.043	221.937	223.468	208.006	215.779
Xelaev18012769m	SUMF2	488.731	51.251	51.638	53.557	55.825	56.2	55.825	56.946	54.696	52.793
Xelaev18012771m	CCT6A	11807.8	1292.4	1384.9	1283	1311.11	1301.77	1292.4	1273.58	1320.42	1348.21
Xelaev18012772m	NIPSNAP2	8672.31	781.093	1005.67	882.052	923.961	1012.36	965.149	958.332	1078.38	1065.31
Xelaev18012773m	MRPS17	2259.89	263.733	257.009	238.137	239.877	253.62	250.213	241.612	255.317	260.379
Xelaev18012776m	SBDS	2174.2	247.047	227.281	248.666	232.282	245.423	237.242	245.423	247.047	243.795
Xelaev18012778m	TYW1	41.97	4.709	4.423	4.823	4.248	4.624	4.851	5.074	4.509	4.709
Xelaev18012789m	C11ORF54	9061.59	1028.38	976.16	1013.55	968.624	1020.98	991.175	991.175	1035.77	1035.77
Xelaev18012800m	RFC2	4028.1	424.95	397.511	451.816	441.805	471.623	461.754	465.052	455.137	458.449
Xelaev18012802m	EIF4H	139.258	16.752	13.906	14.799	15.24	16.217	16.109	16.752	14.243	15.24
Xelaev18012803m	MYBBP1A	1789.51	203.393	182.077	208.931	196.388	206.169	202	200.603	193.559	196.388
Xelaev18012807m	ANKFY1	397.392	43.238	47.508	43.571	42.569	44.895	44.234	43.903	43.571	43.903
Xelaev18012808m	CYB5D2	564.809	63.339	64.912	60.946	60.543	62.546	64.912	62.546	60.543	64.521
Xelaev18012809m	ATP2A3	3032.91	333.511	323.62	333.511	331.047	350.585	345.736	360.216	328.578	326.102
Xelaev18012811m	CAMKK1	100.498	10.706	10.706	11.01	10.782	11.682	11.236	11.385	11.161	11.83
Xelaev18012817m	RCC1L	708.932	80.619	75.256	78.249	76.458	80.619	79.437	77.056	80.619	80.619
Xelaev18012818m	CEP97	242.346	27.107	25.338	27.882	27.495	27.689	28.649	26.717	25.932	25.537
Xelaev18012826m	ALCAM	280.304	43.226	27.499	30.947	31.265	24.723	29.494	24.365	28.172	40.614
Xelaev18012838m	CIP2A	269.372	27.861	26.31	30.658	29.164	31.499	31.917	31.499	29.594	30.869
Xelaev18012847m	AKAP1	1075.1	169.854	154.004	157.065	139.96	118.763	100.643	87.916	79.391	67.499
Xelaev18012849m	NF1	35.604	4.767	4.038	4.063	3.911	4.139	3.835	3.731	3.573	3.546
Xelaev18012858m	RABEP1	475.924	54.731	50.169	52.848	51.706	55.105	52.848	54.731	50.94	52.848
Xelaev18012860m	NUP88	464.467	49.764	48.23	54.276	50.525	53.905	52.036	52.036	51.282	52.412
Xelaev18012861m	RPAIN	377.767	37.792	39.126	40.442	42.255	43.022	43.276	43.53	44.036	44.288
Xelaev18012862m	C1QBP	7835.32	860.477	810.313	866.668	835.54	891.266	879	885.141	897.374	909.544
Xelaev18012865m	PCNP	1114.43	127.506	108.96	132.4	113.266	132.4	123.378	126.684	115.822	134.017
Xelaev18012866m	TRMT10C	131.836	13.669	12.528	15.037	14.04	15.48	14.948	16.264	14.04	15.831
Xelaev18012867m	FAM172BP	14.216	1.601	1.445	1.63	1.64	1.592	1.63	1.63	1.495	1.553
Xelaev18012868m	SENP7	50.737	4.895	4.748	5.684	5.614	5.649	6.442	6.442	5.473	5.789
Xelaev18012874m	GPM6B	2178.38	256.393	229.576	262.936	238.073	254.748	239.76	248.127	217.482	231.284
Xelaev18012876m	TRAPPC2	1998.99	205.11	188.412	208.401	196.813	219.801	221.415	213.309	260.735	284.992
Xelaev18012877m	RAB9A	197.097	19.843	23.778	24.219	21.837	21.382	21.988	24.365	19.687	19.998
Xelaev18012887m	PRPS2	710.958	81.171	73.028	75.783	75.236	77.416	80.639	79.035	82.758	85.893
Xelaev18012909m	GK	34.606	3.98	3.458	3.858	3.381	3.66	3.709	3.956	3.956	4.647
Xelaev18012917m	CCDC138	6.999	0.451	0.457	0.598	0.647	0.815	0.887	1.031	0.989	1.123
Xelaev18012918m	RANBP2	1560.33	176.247	164.589	178.803	167.203	180.076	176.247	173.679	173.679	169.803
Xelaev18012932m	CHST10	48.545	5.194	5.304	5.376	5.267	5.985	5.879	5.413	5.194	4.934
Xelaev18012935m	PDCL3	2390.09	273.573	240.993	278.854	255.673	282.353	266.47	266.47	255.673	270.031
Xelaev18012940m	CNOT11	555.906	66.714	61.208	67.03	58.869	62.197	57.853	66.714	55.446	59.877
Xelaev18012944m	MAP4K4	115.145	12.099	12.188	12.806	12.631	13.068	12.806	12.981	13.671	12.894
Xelaev18012963m	MRPS9	2872.65	319.464	312.418	321.8	307.689	326.454	321.8	314.773	326.454	321.8
Xelaev18012965m	TGFBRAP1	86.748	8.764	9.447	9.582	9.447	10.379	9.649	9.983	9.916	9.582
Xelaev18012966m	C2ORF49	355.734	38.492	34.139	39.903	36.484	41.295	39.903	40.74	41.018	43.761
Xelaev18012970m	2019-09-10	880.155	92.297	113.183	85.718	92.297	88.663	100.127	93.738	107.752	106.38
Xelaev18012976m	CDC16	596.933	63.466	63.966	65.458	64.464	67.921	69.385	69.385	67.431	65.458
Xelaev18012989m	EIF5B	637.491	69.767	64.543	70.795	69.25	73.342	74.353	73.342	70.281	71.817
Xelaev18012992m	TM2D3	204.464	20.529	18.057	23.602	21.661	24.825	24.42	24.555	26.429	20.386
Xelaev18012993m	TXNDC9	17753.9	2012.05	2040.17	1941.12	1941.12	1983.79	1969.61	1955.38	1983.79	1926.82
Xelaev18012997m	LIPT1	106.291	11.221	10.803	11.797	11.138	11.797	12.203	12.525	12.525	12.284
Xelaev18012998m	TSGA10	127.119	12.655	11.471	14.624	14.165	14.441	15.166	14.896	14.896	14.805
Xelaev18013007m	TMEM131	48.588	4.793	4.107	5.935	4.793	5.562	5.972	6.155	5.411	5.861
Xelaev18013011m	UBE3A	727.871	83.194	75.013	80.886	79.724	83.194	81.465	81.465	80.886	82.043
Xelaev18013025m	CYFIP1	87.502	9.09	8.122	8.611	8.955	9.293	9.627	9.023	9.627	15.154
Xelaev18013027m	TUBGCP5	155.111	17.535	17.15	17.407	16.892	17.407	17.663	17.663	16.632	16.762
Xelaev18013029m	SLC9A7	105.936	11.039	11.927	12.166	11.365	11.687	12.007	11.202	11.283	13.261
Xelaev18013039m	PPP2R3B	375.649	39.827	37.007	39.517	45.261	43.776	45.261	41.667	41.971	41.362
Xelaev18013047m	DCUN1D2	100.119	11.305	10.826	10.665	10.013	11.464	11.305	10.826	11.778	11.935
Xelaev18013049m	GRTP1	83.653	9.255	8.793	9.581	9.516	9.839	9.839	9.646	8.593	8.593
Xelaev18013051m	LAMP1	2275.98	250.705	248.899	248.899	243.452	257.882	254.303	261.442	254.303	256.095
Xelaev18013053m	CUL4A	361.328	39.357	38.239	40.463	39.079	41.285	42.371	42.1	39.635	38.8
Xelaev18013054m	PCID2	225.67	23.728	22.391	24.483	25.23	25.043	26.521	25.97	26.704	25.601
Xelaev18013061m	TUBGCP3	350.936	37.229	33.691	36.939	38.097	41.786	39.813	39.529	42.066	41.786
Xelaev18013063m	ARHGEF7	28.743	2.711	2.924	3.29	3.21	3.31	3.33	3.29	3.19	3.487
Xelaev18013067m	CARS2	2030.22	230.59	222.245	230.59	217.187	228.93	222.245	222.245	225.596	230.59
Xelaev18013068m	NAXD	935.016	107.39	99.719	105.108	95.022	102.81	104.344	103.578	107.39	109.655
Xelaev18013078m	LIG4	50.827	5.007	4.389	4.931	5.121	5.271	6.109	6.215	6.532	7.253
Xelaev18013095m	TEX30	157.994	16.75	17.129	17.003	17.505	17.754	18.862	18.862	17.38	16.75
Xelaev18013098m	BHMT	456.862	50.608	47.296	51.335	49.512	50.608	50.972	51.335	52.058	53.137
Xelaev18013099m	ERCC5	184.36	19.238	18.462	20.91	20.458	21.358	21.507	20.76	20.307	21.358
Xelaev18013102m	TPP2	515.236	58.378	53.309	55.441	53.738	57.962	58.793	59.208	57.962	60.445
Xelaev18013110m	TMTC4	124.975	14.096	13.001	14.292	13.303	14.096	13.998	14.194	13.899	14.096
Xelaev18013111m	PCCA	6173.15	681.421	721.873	676.307	676.307	676.307	681.421	676.307	696.685	686.522
Xelaev18013120m	CLYBL	1297.38	146.716	137.301	153.89	139.413	144.643	145.681	144.643	139.413	145.681
Xelaev18013122m	TM9SF2	558.461	60.971	57.163	65.093	58.443	65.499	64.685	64.685	59.29	62.632
Xelaev18013124m	UBAC2	89.919	10.218	8.67	9.594	9.664	9.804	10.424	10.356	10.56	10.628
Xelaev18013132m	IPO5	517.528	56.672	58.25	55.875	55.875	58.642	57.463	58.642	58.25	57.857
Xelaev18013138m	UGGT2	4601.48	510.469	491.278	518.078	491.278	518.078	514.278	514.278	521.869	521.869
Xelaev18013139m	DNAJC3	1035.18	104.503	98.453	114.586	112.097	121.129	125.951	122.744	114.586	121.129
Xelaev18013152m	DCT	756.159	80.151	74.369	82.68	84.562	87.671	87.052	96.207	80.786	82.68
Xelaev18013183m	MYCBP2	44.216	3.513	3.788	5.265	4.837	5.335	5.58	5.406	5.441	5.052
Xelaev18013188m	CLN5	77.978	8.291	8.467	8.055	8.115	8.93	9.102	9.102	8.699	9.216
Xelaev18013189m	GATD3A	15764.3	1737.53	1711.92	1775.69	1686.17	1775.69	1750.28	1775.69	1763	1788.35
Xelaev18013192m	LMO7	420.59	73.08	65.42	67.722	58.332	47.067	36.522	29.1	25.125	18.221
Xelaev18013195m	UCHL3	30916.6	3412.67	3332.47	3492.22	3305.58	3359.27	3359.27	3278.62	3753.05	3623.45
Xelaev18013196m	COMMD6	209.239	23.525	20.996	23.525	22.342	24.428	24.171	23.525	21.538	25.191
Xelaev18013197m	TBC1D4	97.075	20.56	17.331	15.401	11.291	7.444	5.902	5.996	5.618	7.532
Xelaev18013200m	DIS3	427.358	48.14	44.669	47.796	46.415	49.164	48.823	48.482	46.762	47.108
Xelaev18013219m	TDRD3	72.203	8.756	7.404	9.357	8.089	7.932	8.089	7.828	7.775	6.973
Xelaev18013220m	DIAPH3	475.989	47.628	46.816	50.833	52.017	56.662	56.662	56.662	53.969	54.743
Xelaev18013232m	SUGT1	2054.79	237.167	203.807	245.249	210.623	233.907	225.688	224.032	240.411	233.907
Xelaev18013235m	WBP4	216.063	21.833	18.797	24.416	22.91	25.886	25.155	26.032	24.713	26.321
Xelaev18013238m	NAA16	33.37	3.802	3.205	3.68	3.655	4.042	3.898	3.802	3.606	3.68
Xelaev18013240m	VWA8	492.711	53.158	52.331	54.799	52.745	56.829	56.829	56.425	53.981	55.614
Xelaev18013244m	AKAP11	21.364	2.705	2.441	2.664	2.525	2.441	2.384	2.284	2.05	1.868
Xelaev18013249m	DNAJC15	209.219	22.459	21.816	23.882	22.937	24.193	24.038	24.193	23.725	21.977
Xelaev18013254m	TSC22D1	457.687	61.655	60.354	55.391	47.488	49.588	46.782	45.716	46.072	44.642
Xelaev18013257m	NUFIP1	271.724	32.99	28.53	31.798	29.36	30.791	29.976	30.385	28.946	28.946
Xelaev18013258m	GPALPP1	1084.41	121.074	110.918	123.561	121.074	124.387	122.734	125.21	116.883	118.566
Xelaev18013263m	TPT1	102437	10903.2	10817.7	11073.5	11495.6	11495.6	11662.9	11579.4	11746.3	11662.9
Xelaev18013267m	COG3	254.134	26.733	26.733	27.149	27.562	28.179	30.605	30.205	28.791	28.179
Xelaev18013272m	CPB2	93.42	9.644	11.253	10.49	10.49	10.167	10.361	10.746	9.972	10.297
Xelaev18013279m	ESD	886.568	98.975	96.21	97.596	96.21	98.975	96.904	98.286	103.066	100.346
Xelaev18013281m	SUCLA2	10036.7	1149.87	1012.92	1165.59	1053.86	1141.98	1118.2	1134.07	1126.14	1134.07
Xelaev18013282m	NUDT15	568.414	67.082	58.084	65.398	63.701	65.82	61.99	61.56	58.959	65.82
Xelaev18013284m	ITM2B	202.736	19.757	19.3	23.153	21.403	24.72	25.84	24.438	21.551	22.575
Xelaev18013313m	FKBP11	596.234	67.267	63.615	63.615	64.535	65.906	66.361	66.814	70.404	67.718
Xelaev18013320m	PRKAG1	250.338	27.974	28.173	26.36	26.969	27.974	28.571	27.573	28.372	28.372
Xelaev18013321m	KMT2D	8.35	0.927	0.865	0.902	0.84	0.933	0.957	1	0.963	0.963
Xelaev18013334m	Xelaev18013334m	23.513	1.704	1.628	2.432	2.73	3.002	3.313	2.986	2.746	2.971
Xelaev18013338m	SPATS2	27.109	3.265	2.851	3.589	2.991	2.991	3.011	2.891	2.811	2.709
Xelaev18013345m	CD63	15063.9	1667.53	1532.19	1691.73	1581.87	1763.62	1703.78	1679.65	1703.78	1739.77
Xelaev18013349m	WDR61	2102.32	219.391	201.505	221.153	217.625	235.08	233.354	235.08	275.326	263.803
Xelaev18013350m	CNPY2	8517.31	984.743	908.688	929.635	901.67	964.201	936.582	908.688	984.743	998.359
Xelaev18013352m	CS	183.134	20.196	17.713	19.623	19.767	20.054	20.054	19.767	23.252	22.708
Xelaev18013353m	COQ10B	46.377	4.919	5.046	5.266	5.545	4.887	5.328	5.203	5.328	4.855
Xelaev18013355m	UQCC3	16777.3	1844.74	1820.82	1844.74	1927.33	1892.14	1903.9	1962.21	1784.67	1796.76
Xelaev18013364m	MYL6	2390.46	263.791	254.777	272.684	236.351	270.915	270.915	276.209	252.958	291.856
Xelaev18013367m	ZC3H10	31.557	3.585	3.048	3.63	3.285	3.855	3.494	3.562	3.332	3.766
Xelaev18013368m	PA2G4	11309.4	1268.4	1197.5	1277.15	1233.15	1259.62	1268.4	1268.4	1268.4	1268.4
Xelaev18013373m	SUOX	286.742	29.727	25.946	32.227	30.416	34.439	33.781	35.092	31.552	33.561
Xelaev18013377m	CDK2	77.382	8.311	8.367	8.311	8.196	8.481	9.318	9.042	8.706	8.65
Xelaev18013378m	PMEL	173.361	20.527	18.216	21.191	19.856	21.718	20.393	20.125	15.668	15.668
Xelaev18013381m	PAN2	245.215	27.205	26.602	26.803	25.994	28.004	27.406	26.803	28.992	27.406
Xelaev18013384m	SARNP	1244.98	132.878	131.021	137.464	133.801	136.553	141.979	142.873	142.873	145.541
Xelaev18013388m	MMP19	19.382	2.252	2.072	2.059	2.15	2.124	2.111	2.188	2.239	2.188
Xelaev18013389m	PYM1	623.751	71.237	62.985	72.656	65.941	71.237	70.286	70.286	67.885	71.237
Xelaev18013392m	TIMELESS	293.163	33.834	33.383	32.474	32.246	32.474	32.703	31.786	32.246	32.016
Xelaev18013399m	BAZ2A	95.906	11.201	10.973	11.125	10.045	10.82	10.513	10.202	10.513	10.513
Xelaev18013400m	ATP5F1B	24214	2630.03	2589.27	2710.97	2650.34	2751.14	2670.6	2609.67	2751.14	2850.79
Xelaev18013402m	PTGES3	5930.75	662.541	657.972	662.541	648.795	667.098	648.795	657.972	653.39	671.643
Xelaev18013403m	NACA	2576.76	345.944	603.686	278.174	382.014	242.637	217.698	193.738	158.879	153.994
Xelaev18013406m	RDH16	1565.49	178.387	171.97	174.546	160.223	178.387	180.933	177.109	171.97	171.97
Xelaev18013410m	RDH16	664.586	70.376	66.801	74.371	72.385	76.335	74.371	78.762	73.877	77.31
Xelaev18013411m	HSD17B6	52.022	9.442	4.93	7.207	5.506	5.008	4.734	4.773	4.615	5.806
Xelaev18013417m	MYO1B	165.213	18.072	16.545	18.816	18.939	18.939	18.445	18.445	18.321	18.692
Xelaev18013429m	SHMT2	13141.4	1462.73	1375.43	1462.73	1430.2	1484.27	1451.91	1473.51	1473.51	1527.05
Xelaev18013438m	MARS	2333.57	266.033	230.846	273.24	253.261	264.222	260.585	266.033	260.585	258.761
Xelaev18013439m	MARS	2969.86	340.94	316.824	336.164	319.262	333.767	331.364	343.32	319.262	328.956
Xelaev18013442m	DCTN2	2139.2	231.984	226.796	221.559	219.803	245.601	231.984	235.418	260.569	265.482
Xelaev18013444m	PIP4K2C	977.177	108.074	106.515	104.947	107.295	106.515	115.765	108.074	113.476	106.515
Xelaev18013451m	B4GALNT1	227.734	23.803	23.237	25.845	24.738	26.028	26.393	27.66	24.738	25.293
Xelaev18013468m	METTL1	1103.4	124.094	114.228	124.978	121.43	124.978	122.32	126.739	121.43	123.208
Xelaev18013471m	TSFM	1039.19	108.982	108.982	116.296	113.068	117.098	117.098	117.098	121.078	119.492
Xelaev18013476m	LETMD1	198.34	20.52	21.436	23.462	21.307	21.695	23.213	23.462	20.784	22.46
Xelaev18013507m	ATF1	1744.79	168.039	174.935	201.625	180.383	202.926	205.519	206.811	202.926	201.625
Xelaev18013511m	LARP4	177.013	27.725	23.886	18.036	17.215	18.708	18.708	18.306	17.076	17.353
[truncated: 5,975 more rows]

## Sheet: MassProteinData
GeneID	GeneSymbol	Mean-Concentration,nM	Clutch A Concentration,nM	Clutch B Concentration,nM	Clutch C Concentration,nM
MT-ATP6	MT-ATP6	790.647	0	790.647	0
MT-CO2	MT-CO2	976.706	0	1911.84	41.569
MT-ND1	MT-ND1	1318.54	0	1727.29	909.792
MT-ND2	MT-ND2	7896.07	0	7896.07	0
MT-ND4	MT-ND4	1469.88	0	2799.17	140.589
MT-ND5	MT-ND5	19355.2	0	18397.3	20313
MT-ND6	MT-ND6	7550.32	0	12505.1	2595.57
Xelaev18000027m	BCAP31	9148.87	8063.84	3118.09	16264.7
Xelaev18000029m	PLXNB3	103.939	0	50.22	157.657
Xelaev18000032m	HSD17B10	6095.15	2416.2	6763.57	9105.67
Xelaev18000039m	IGF2BP3	2230.74	4152.45	319.121	2220.64
Xelaev18000059m	TMEM82	239.432	0	239.432	0
Xelaev18000064m	CBL	79.96	0	91.864	68.055
Xelaev18000071m	PGM2L1	594.8	0	638.836	550.764
Xelaev18000085m	APOL2	4918.42	0	4918.42	0
Xelaev18000090m	GKAP1	1948.55	2044.64	1753.02	2047.99
Xelaev18000104m	VNN1	599.636	758.013	307.585	733.311
Xelaev18000105m	VNN1	223.589	0	223.589	0
Xelaev18000122m	SMARCA5	279.446	273.93	48.897	515.511
Xelaev18000129m	TAF10	365.654	0	628.957	102.35
Xelaev18000134m	PPP1R3B	54.174	0	88.105	20.244
Xelaev18000136m	ERI1	481.911	645.993	629.162	170.578
Xelaev18000138m	UBAP2	896.91	1152.07	549.194	989.469
Xelaev18000142m	NOL6	188.452	309.473	171.761	84.123
Xelaev18000191m	TMED10	860.501	1612.49	108.513	0
Xelaev18000195m	PGGHG	1578.85	754.626	1723.51	2258.41
Xelaev18000200m	GAPDH	1713.76	733.614	792.734	3614.93
Xelaev18000219m	CCAR1	106.315	0	33.54	179.09
Xelaev18000221m	DDX21	261.257	333.976	369.822	79.974
Xelaev18000278m	ZMYM1	15.356	0	9.592	21.121
Xelaev18000280m	DAD1	2405.29	0	1081.25	3729.33
Xelaev18000304m	DLAT	10736.3	18295.5	9671.12	4242.17
Xelaev18000317m	Xelaev18000317m	85.708	0	59.28	112.137
Xelaev18000361m	MED28	499.755	570.712	719.374	209.18
Xelaev18000370m	PRRC2B	407.531	398.133	416.929	0
Xelaev18000373m	NUP214	1229.18	672.956	1272.39	1742.19
Xelaev18000378m	CXORF56	293.151	0	0	293.151
Xelaev18000382m	C22ORF39	618.289	0	776.652	459.926
Xelaev18000384m	HIRA	176.641	84.163	223.726	222.033
Xelaev18000412m	KDELC2	2288.8	0	4516.58	61.012
Xelaev18000414m	CALR	10798	11732	4170.36	16491.7
Xelaev18000429m	CCT5	16404.9	11488.1	3249.32	34477.4
Xelaev18000443m	SMG9	97.455	0	97.455	0
Xelaev18000461m	SUMO3	8378.97	6826.27	23.755	18286.9
Xelaev18000496m	GDAP2	324.718	0	413.773	235.663
Xelaev18000497m	WDR3	380.73	214.447	494.428	433.313
Xelaev18000507m	FH	21609.1	9028.46	27334.7	28464.2
Xelaev18000521m	LLGL1	1448.5	0	2016.19	880.819
Xelaev18000522m	OSTC	889.538	0	933.768	845.308
Xelaev18000562m	VDAC2	66448.4	53938.4	88768.2	56638.7
Xelaev18000572m	ADK	9818.65	5904.19	11050.2	12501.5
Xelaev18000573m	VCL	10807.3	7388.56	10964.6	14068.7
Xelaev18000575m	CHUK	237.006	0	293.891	180.122
Xelaev18000578m	ANXA11	514.334	866.162	539.034	137.807
Xelaev18000590m	TIMM23	1829.68	0	1595.08	2064.27
Xelaev18000591m	HAUS7	745.13	0	0	745.13
Xelaev18000600m	GHITM	1269.95	750.104	1972.39	1087.35
Xelaev18000650m	GLUD1	1854.42	3419.33	285.126	1858.8
Xelaev18000665m	SNCG	4112.01	1697.92	6526.1	0
Xelaev18000673m	WAPL	113.55	51.636	133.919	155.094
Xelaev18000682m	CCSER2	7.64	0	7.64	0
Xelaev18000685m	MTTP	356.099	53.068	888.145	127.084
Xelaev18000728m	SLC44A2	38.468	0	38.468	0
Xelaev18000730m	ILF3	1082.08	2213.6	306.514	726.117
Xelaev18000735m	QTRT1	1258.27	3556.7	53.186	164.915
Xelaev18000741m	CARM1	6628.63	0	6201.62	7055.64
Xelaev18000742m	YIPF1	706.845	1024.19	60.437	1035.9
Xelaev18000743m	TIMM29	1939.17	1391.87	783.383	3642.27
Xelaev18000745m	SMARCA4	203.687	258.146	233.959	118.956
Xelaev18000746m	LDLR	117.782	0	117.782	0
Xelaev18000755m	PRKCSH	6506.98	10953.4	2726.57	5840.99
Xelaev18000759m	ECSIT	1115.94	50.973	1761.76	1535.08
Xelaev18000762m	CNN1	336.36	0	0	336.36
Xelaev18000772m	GADD45GIP1	2147.32	3266.52	2801.09	374.343
Xelaev18000773m	TTC39A	128.67	0	131.579	125.762
Xelaev18000774m	CALR	3330.99	9215.98	350.176	426.816
Xelaev18000775m	FARSA	1461.97	2114.65	574.417	1696.85
Xelaev18000793m	RAB3D	200.108	341.556	58.659	0
Xelaev18000801m	HOOK2	109.573	0	109.573	0
Xelaev18000810m	TRMT1	257.855	301.341	223.894	248.329
Xelaev18000813m	FBXW9	52.454	0	0	52.454
Xelaev18000814m	TNPO2	877.449	767.662	111.125	1753.56
Xelaev18000816m	ASNA1	2576.45	194.709	1758.35	5776.29
Xelaev18000817m	CLPP	4936.06	3645.8	6226.31	0
Xelaev18000819m	PALM3	170.844	283.001	58.686	0
Xelaev18000828m	C19ORF53	13.825	0	23.256	4.394
Xelaev18000829m	KHSRP	1092.62	1453.26	1060.21	764.388
Xelaev18000833m	TUBB4B	2239.49	3996.93	482.04	0
Xelaev18000834m	C3	91.603	0	129.97	53.236
Xelaev18000835m	C3	230.798	391.036	70.561	0
Xelaev18000863m	MBLAC1	1055.83	0	1426.68	684.972
Xelaev18000867m	LAMTOR4	1428.98	0	1917.94	940.02
Xelaev18000876m	AP4M1	94.294	0	59.122	129.465
Xelaev18000877m	MCM7	81.602	60.298	103.504	81.004
Xelaev18000878m	COPS6	964.479	1144.85	953.479	795.109
Xelaev18000887m	AURKB	26.565	0	13.481	39.65
Xelaev18000926m	SLC25A11	3349.44	4220.02	3640.01	2188.29
Xelaev18000928m	ZP2	368.191	32.934	691.972	379.666
Xelaev18000932m	MINK1	79.644	0	51.374	107.913
Xelaev18000936m	ZP3	4610.01	584.272	3831.21	9414.55
Xelaev18000944m	PSMB6	3946.75	0	3938.86	3954.64
Xelaev18000954m	FIS1	2977.18	2123.4	3065.77	3742.37
Xelaev18000956m	PLSCR2	156.838	0	303.588	10.088
Xelaev18001004m	ZP3	1785.12	155.464	4586.46	613.451
Xelaev18001011m	PLOD3	528.818	528.818	0	0
Xelaev18001014m	RNF13	74.682	0	74.682	0
Xelaev18001015m	PFN1	128736	51522.3	229360	105325
Xelaev18001020m	KIF1C	29.689	40.537	3.275	45.255
Xelaev18001047m	POP7	506.045	0	223.094	788.995
Xelaev18001053m	PPP1R35	100.904	0	100.904	0
Xelaev18001057m	MPDU1	195.383	0	0	195.383
Xelaev18001058m	EIF4A1	3141.44	0	5426.6	856.268
Xelaev18001060m	SENP3	244.936	0	233.215	256.657
Xelaev18001081m	ELP5	341.836	391.185	358.702	275.621
Xelaev18001084m	YBX2	4839.65	2177.18	5206.3	7135.48
Xelaev18001094m	POLR2A	26.275	0	26.275	0
Xelaev18001108m	TP53RK	2856.84	1239.4	4814.62	2516.5
Xelaev18001119m	CHERP	220.678	412.128	149.486	100.42
Xelaev18001121m	EPS15L1	593.632	123.186	241.234	1416.48
Xelaev18001127m	COPE	654.968	824.401	485.535	0
Xelaev18001128m	DDX49	148.073	0	0	148.073
Xelaev18001129m	HOMER3	148.968	0	0	148.968
Xelaev18001132m	SRP72	2154.33	1771.17	2460.45	2231.37
Xelaev18001143m	NCLN	997.416	330.302	2647.8	14.147
Xelaev18001151m	BORCS8	433.741	0	634.322	233.161
Xelaev18001155m	NGRN	105.967	129.373	82.56	0
Xelaev18001159m	GATAD2A	731.274	50.972	1264.74	878.113
Xelaev18001164m	GTPBP3	929.286	0	804.111	1054.46
Xelaev18001180m	CCDC124	1364.71	1668.77	1133.09	1292.28
Xelaev18001195m	MYO9B	15.121	0	27.364	2.878
Xelaev18001201m	MAP1S	518.267	648.721	138.313	767.767
Xelaev18001214m	NANS	8216.43	13354.5	10633.9	660.875
Xelaev18001215m	TRIM14	89.403	0	172.086	6.72
Xelaev18001235m	DCAF10	140.751	0	179.357	102.145
Xelaev18001240m	SNX30	174.983	144.933	196.116	183.9
Xelaev18001242m	INIP	683.845	359.449	1133.84	558.247
Xelaev18001244m	HSDL2	37284	22851.4	41892	47108.7
Xelaev18001252m	DNAJC25	759.732	1349.01	688.957	241.232
Xelaev18001296m	NFATC2IP	294.05	246.332	327.992	307.827
Xelaev18001297m	EIF3CL	1279.54	1268.22	1973.08	597.308
Xelaev18001299m	ADPRH	2275.94	64.59	3378.13	3385.11
Xelaev18001314m	SPNS1	90.719	0	90.719	0
Xelaev18001321m	PITPNB	1132.86	1751.01	514.72	0
Xelaev18001328m	EHD3	94.543	0	101.737	87.348
Xelaev18001331m	BOLA2	14859.9	22179.3	5179.78	17220.7
Xelaev18001337m	NUDT9	4110.98	1912.06	4209.57	6211.31
Xelaev18001342m	ALDOA	18637.1	53157.7	1112.29	1641.27
Xelaev18001346m	MVP	1362.82	2615.18	1159.36	313.904
Xelaev18001350m	KIF22	249.74	0	264.643	234.838
Xelaev18001483m	DPPA2	886.547	0	886.547	0
Xelaev18001485m	NME2	85957.9	48478.9	6080.33	203315
Xelaev18001487m	NUFIP2	75.211	0	20.537	129.886
Xelaev18001507m	B2M	205.621	0	0	205.621
Xelaev18001521m	CTF1	271.943	487.003	18.16	310.667
Xelaev18001524m	STX4	1269.05	1487.85	277.222	2042.08
Xelaev18001528m	FBXL19	25.487	0	0	25.487
Xelaev18001532m	TRIM69	1839.43	3980.5	842.402	695.395
Xelaev18001533m	KAT8	30.083	0	0	30.083
Xelaev18001534m	PRSS8	777.984	0	777.984	0
Xelaev18001535m	FUS	555.279	254.707	470.036	941.094
Xelaev18001541m	URGCP	606.487	1098.13	350.727	370.604
Xelaev18001553m	URGCP	17.172	0	0	17.172
Xelaev18001563m	PRF1	12.372	0	0	12.372
Xelaev18001575m	MAPK7	127.807	0	127.807	0
Xelaev18001577m	TRIM69	21.384	0	37.697	5.071
Xelaev18001582m	RNF112	780.146	374.609	973.009	992.819
Xelaev18001653m	Xelaev18001653m	139.692	0	201.332	78.052
Xelaev18001669m	IRGC	119.701	0	168.892	70.509
Xelaev18001677m	ADAR	813.438	1432.52	0	194.356
Xelaev18001735m	PPIF	16117.1	18506.1	17405.8	12439.4
Xelaev18001739m	NDUFA13	9360.07	6219.99	10675	11185.2
Xelaev18001743m	Xelaev18001743m	1002.24	619.332	1151.95	1235.45
Xelaev18001770m	PDHB	7375.02	6045.37	5901.12	10178.6
Xelaev18001771m	KCTD6	140.69	0	140.69	0
Xelaev18001774m	APPL1	138.465	42.849	165.871	206.673
Xelaev18001782m	CCDC66	65.464	0	76.312	54.617
Xelaev18001801m	DCP1A	224.748	254.221	206.252	213.771
Xelaev18001802m	TKT	18046.1	18790	13774.3	21574
Xelaev18001820m	BOD1	819.458	235.191	0	1403.72
Xelaev18001826m	FAM120A	107.003	63.843	109.052	148.112
Xelaev18001836m	CNBP	750.37	392.877	0	1107.86
Xelaev18001837m	TSEN2	156.68	0	114.227	199.133
Xelaev18001838m	YIPF4	719.408	0	292.749	1146.07
Xelaev18001839m	NUP210	1022.43	356.623	1491.58	1219.08
Xelaev18001856m	ATG7	3554.26	3637.39	4776.89	2248.5
Xelaev18001868m	RAF1	39.479	0	0	39.479
Xelaev18001869m	MKRN2	746.825	313.492	899.807	1027.17
Xelaev18001871m	ISY1	2828.5	4022.69	2146.95	2315.86
Xelaev18001873m	ITIH3	421.729	0	175.845	667.612
Xelaev18001875m	MTO1	198.328	121.547	275.108	0
Xelaev18001903m	GSE1	33.686	0	0	33.686
Xelaev18001918m	BANP	150.475	0	139.149	161.801
Xelaev18001923m	ZC3H18	91.097	116.272	0	65.921
Xelaev18001929m	UBA2	1422.71	2358.43	463.366	1446.33
Xelaev18001932m	GPI	25692.3	27797.5	15521	33758.4
Xelaev18001936m	LSM14A	2814.49	0	275.566	5353.41
Xelaev18001943m	PEPD	1921.13	2732.45	1526.11	1504.84
Xelaev18001977m	UBL4A	2092.46	1238.87	99.565	4938.95
Xelaev18001979m	LIN54	62.175	0	51.826	72.523
Xelaev18001982m	HELQ	23.449	0	38.756	8.142
Xelaev18002012m	HNRNPDL	2419.62	4424.02	0	415.214
Xelaev18002013m	ENOPH1	372.219	77.152	567.754	471.752
Xelaev18002023m	NUP98	2505.92	0	4219.93	791.902
Xelaev18002032m	NUP205	1757.07	0	1757.07	0
Xelaev18002040m	NTPCR	1196.26	746.087	1595.16	1247.55
Xelaev18002043m	ALYREF	511.953	210.625	855.665	469.568
Xelaev18002048m	P4HB	22024.1	19691.4	22085.4	24295.6
Xelaev18002092m	DGKE	178.219	0	178.219	0
Xelaev18002115m	ASRGL1	1496.51	813.889	2360.09	1315.55
Xelaev18002130m	COL12A1	71.141	0	42.521	99.76
Xelaev18002133m	FILIP1	19.749	0	32.209	7.288
Xelaev18002134m	SENP6	50.684	0	21.204	80.165
Xelaev18002147m	SH3BGRL2	438.601	438.601	0	0
Xelaev18002149m	DDX43	2879.99	1427.4	3446.18	3766.39
Xelaev18002150m	TTK	313.91	309.857	177.075	454.797
Xelaev18002152m	BCKDHB	843.752	0	0	843.752
Xelaev18002154m	IBTK	186.084	0	151.586	220.583
Xelaev18002158m	EIF2S1	4798.07	4798.07	0	0
Xelaev18002187m	NMRAL1	3527.48	6167	3965.99	449.464
Xelaev18002191m	HMOX2	668.22	0	622.579	713.861
Xelaev18002193m	TUFM	18207.6	7585.57	16761.1	30276.1
Xelaev18002195m	ATXN2L	933.148	1545.8	475.854	777.788
Xelaev18002198m	MTO1	252.792	0	137.186	368.398
Xelaev18002199m	PPP1CA	1288.7	1653.38	1059.85	1152.87
Xelaev18002234m	EIF3CL	540.441	400.815	0	680.068
Xelaev18002241m	CD274	1544.22	0	1509.36	1579.08
Xelaev18002253m	PITPNB	2774.84	3013.48	2536.21	0
Xelaev18002259m	EHD3	182.992	0	235.483	130.502
Xelaev18002260m	SGF29	135.174	71.516	198.832	0
Xelaev18002268m	ALDOA	20728	49475	1723.87	10985.2
Xelaev18002270m	MVP	871.373	2344.54	108.125	161.449
Xelaev18002272m	KIF22	73.903	0	127.276	20.53
Xelaev18002356m	HIRIP3	540.287	1445.51	13.991	161.364
Xelaev18002359m	NME2	7628.33	9055.78	12720.9	1108.31
Xelaev18002388m	LAMTOR1	792.021	0	400.491	1183.55
Xelaev18002399m	PSMC3IP	555.365	1048.7	106.109	511.29
Xelaev18002400m	Xelaev18002400m	37.907	0	31.229	44.584
Xelaev18002402m	RETREG3	772.743	0	1016.87	528.62
Xelaev18002413m	Xelaev18002413m	626.288	1082.81	124.884	671.172
Xelaev18002419m	SLC39A11	352.333	0	449.904	254.761
Xelaev18002454m	BRAF	652.426	53.958	576.728	1326.59
Xelaev18002462m	LCHN	111.632	0	112.736	110.529
Xelaev18002464m	SSBP1	708.713	1301.97	0	115.456
Xelaev18002471m	MTPN	16567.4	17385.5	11283.6	21033.2
Xelaev18002475m	NUP205	468.124	554.799	505.463	344.109
Xelaev18002485m	FBXO7	208.171	342.507	0	73.835
Xelaev18002487m	RTCB	2495.01	2886.87	1170.82	3427.35
Xelaev18002491m	AKR1B1	13471.9	9248.07	21649.1	9518.62
Xelaev18002493m	AKR1C1	3058.1	4485.7	2105.27	2583.35
Xelaev18002495m	AKR1C3	332.209	0	240.503	423.915
Xelaev18002496m	AKR1C3	2020.86	0	490.832	3550.88
Xelaev18002497m	AKR1C4	7385.18	8312.52	5543.64	8299.37
Xelaev18002502m	TRIM24	33.194	0	11.382	55.005
Xelaev18002508m	TBXAS1	77.821	0	0	77.821
Xelaev18002525m	BORCS5	2562.85	401.772	577.443	6709.34
Xelaev18002534m	ATP6V1E1	1791.79	3552.33	0	31.249
Xelaev18002535m	BCL2L13	695.744	605.644	911.352	570.236
Xelaev18002559m	ACTR8	262.424	0	349.033	175.815
Xelaev18002562m	DCP1A	53.275	42.777	63.773	0
Xelaev18002563m	TKT	5723.12	9983.59	2151.69	5034.08
Xelaev18002578m	FAM120A	64.162	68.679	113.47	10.338
Xelaev18002582m	CNBP	1635.06	3143.98	0	126.134
Xelaev18002590m	ACAD9	24014.4	10921.8	27616.1	33505.2
Xelaev18002597m	TAMM41	1329.02	939.419	1117.49	1930.15
Xelaev18002608m	RAB43	177.463	178.771	176.154	0
Xelaev18002614m	NEK4	64.615	0	64.615	0
Xelaev18002617m	PBRM1	93.238	33.689	228.518	17.506
Xelaev18002619m	NISCH	44.014	0	65.983	22.046
Xelaev18002620m	MRPL9	3314.71	2906.4	3990.26	3047.47
Xelaev18002627m	Xelaev18002627m	86.648	0	130.05	43.246
Xelaev18002646m	DDX4	303.576	0	235.011	372.14
Xelaev18002696m	MTA1	173.286	0	81.808	264.764
Xelaev18002699m	NUSAP1	132.534	85.29	177.543	134.768
Xelaev18002736m	SYCP2L	136.183	0	136.183	0
Xelaev18002749m	SIRT5	2395.7	2049.87	4321.23	816.015
Xelaev18002750m	RANBP9	156.081	87.385	224.776	0
Xelaev18002783m	C9ORF78	722.403	990.31	520.91	655.989
Xelaev18002785m	USP20	39.477	9.363	0	69.592
Xelaev18002789m	TBC1D13	411.301	128.61	157.173	948.122
Xelaev18002793m	PKN2	58.578	25.569	91.586	0
Xelaev18002794m	WDR34	287.447	89.827	206.869	565.645
Xelaev18002795m	SPTAN1	794.629	885.203	405.919	1092.77
Xelaev18002798m	GLE1	515.849	0	608.322	423.377
Xelaev18002801m	CIZ1	17.95	17.95	0	0
Xelaev18002803m	PTGES2	2347.81	2339.86	2216.14	2487.43
Xelaev18002809m	KYAT1	198.014	0	198.014	0
Xelaev18002813m	SLC27A4	90.336	0	125.415	55.256
Xelaev18002816m	COLGALT1	686.575	152.873	954.177	952.676
Xelaev18002818m	CCDC22	793.726	375.327	655.281	1350.57
Xelaev18002825m	KDM5C	121.886	45.101	104.635	215.923
Xelaev18002832m	SEPHS2	1606.37	1555.36	2138.6	1125.13
Xelaev18002833m	IKBKG	76.645	54.838	3.614	171.485
Xelaev18002834m	G6PD	9697.89	5101.2	7330.93	16661.6
Xelaev18002839m	HUWE1	1684.71	1339.75	2107.68	1606.69
Xelaev18002841m	FLNA	3878.44	3138.36	4787.26	3709.71
Xelaev18002846m	Xelaev18002846m	26.949	0	26.949	0
Xelaev18002853m	HCFC1	545.864	257.225	631.3	749.069
Xelaev18002856m	IRAK1	344.155	75.991	478.911	477.563
Xelaev18002900m	MSN	6599.93	11023	3493.02	5283.75
Xelaev18002901m	FDX1	162.087	0	0	162.087
Xelaev18002941m	PSMA5	13362.2	15774.3	4442.73	19869.7
Xelaev18002992m	WASH2P	293.148	228.751	415.823	234.871
Xelaev18003001m	WNK1	267.794	242.402	164.153	396.826
Xelaev18003002m	ERC1	119.932	176.66	81.258	101.88
Xelaev18003039m	FAM208A	74.829	77.784	71.875	0
Xelaev18003043m	IL17RD	29.475	0	47.352	11.599
Xelaev18003048m	PDHB	18558.5	14620.8	19019.9	22034.9
Xelaev18003049m	PXK	226.985	0	226.985	0
Xelaev18003050m	HTD2	634.601	0	271.001	998.201
Xelaev18003051m	RPP14	259.496	0	332.041	186.951
Xelaev18003052m	SCO2	1643.55	396.117	2485.4	2049.12
Xelaev18003062m	FLNA	1063.41	0	0	1063.41
Xelaev18003078m	TGM2	81.256	0	31.735	130.778
Xelaev18003079m	RPRD1B	469.276	0	652.506	286.047
Xelaev18003080m	TTI1	41.613	0	58.04	25.186
Xelaev18003084m	CTNNBL1	347.757	256.455	424.531	362.287
Xelaev18003086m	SRC	332.177	151.443	55.357	789.73
Xelaev18003088m	MANBAL	310.357	0	0	310.357
Xelaev18003090m	RPN2	5538.8	9727.54	4186.9	2701.98
Xelaev18003092m	LPIN3	183.169	0	126.415	239.922
Xelaev18003093m	MYL9	754.774	0	0	754.774
Xelaev18003094m	TGIF2	202.028	0	118.674	285.381
Xelaev18003098m	AAR2	899.952	1177.01	497.292	1025.56
Xelaev18003100m	SRSF6	4058.32	5563.75	5129.62	1481.58
Xelaev18003102m	IFT52	482.794	436.141	343.941	668.3
Xelaev18003103m	Xelaev18003103m	12079.4	15854.8	10592.3	9791.2
Xelaev18003153m	ABCB8	154.208	63.33	211.604	187.689
Xelaev18003154m	CDK5	957.958	1224.97	1391.08	257.827
Xelaev18003160m	AGAP3	94.788	0	94.788	0
Xelaev18003189m	ZNF250	34.097	42.297	25.897	0
Xelaev18003199m	NGRN	57.11	0	0	57.11
Xelaev18003207m	RRAGC	1001.47	1006.28	1758.24	239.883
Xelaev18003248m	PSMD1	2335.14	3577.96	1182.25	2245.21
Xelaev18003250m	ARMC9	152.053	81.527	263.694	110.937
Xelaev18003255m	NCL	18181.5	28371.4	13644.5	12528.7
Xelaev18003257m	PTMA	5716.94	5716.94	0	0
Xelaev18003261m	PDE6D	4800.43	0	4809.77	4791.09
Xelaev18003265m	DIS3L2	350.355	679.62	0	21.09
Xelaev18003279m	Xelaev18003279m	1666.21	363.539	2504.05	2131.03
Xelaev18003285m	DHX8	329.673	473.063	0	186.283
Xelaev18003293m	CWF19L2	333.311	409.396	345.425	245.113
Xelaev18003299m	CUL5	805.606	780.097	429.039	1207.68
Xelaev18003300m	ACAT1	4060.12	9824.73	158.134	2197.5
Xelaev18003303m	KDELC2	1494.62	2088.24	2251.89	143.747
Xelaev18003304m	KDELC1	1981.88	0	1407.25	2556.5
Xelaev18003325m	TOR1B	75.32	0	75.32	0
Xelaev18003332m	PTPA	1047.48	2268.43	808.288	65.724
Xelaev18003333m	CRAT	1341.24	643.754	988.563	2391.39
Xelaev18003343m	FUBP3	436.527	784.129	155.058	370.395
Xelaev18003372m	WDR24	38.457	0	38.457	0
Xelaev18003380m	ATXN2L	1089.86	1174.79	950.343	1144.46
Xelaev18003383m	PPP1CA	1320.77	1225.27	782.443	1954.59
Xelaev18003386m	RABEP2	60.07	0	54.471	65.67
Xelaev18003428m	TECPR1	54.141	0	0	54.141
Xelaev18003533m	SLC2A7	227.319	0	227.319	0
Xelaev18003542m	TSR2	1240.81	0	2073.24	408.383
Xelaev18003547m	APEX2	212.129	211.444	109.602	315.339
Xelaev18003549m	BGN	12.588	0	12.588	0
Xelaev18003564m	VPS9D1	470.015	248.147	439.95	721.947
Xelaev18003566m	SPATA2L	373.075	0	304.582	441.567
Xelaev18003574m	SPG7	2789.64	1027.26	3207.33	4134.32
Xelaev18003582m	PABPN1	1595.98	3171.66	20.298	0
Xelaev18003583m	TRAPPC2L	613.897	562.775	1103.03	175.887
Xelaev18003585m	GALNS	686.439	0	474.45	898.428
Xelaev18003586m	APRT	1002.28	75.705	2722	209.127
Xelaev18003587m	CDT1	73.89	37.494	167.816	16.36
Xelaev18003589m	CTU2	690.066	778.851	494.288	797.059
Xelaev18003594m	Xelaev18003594m	7698.13	11856.2	5253.3	5984.92
Xelaev18003596m	DYNC1LI2	149.025	166.977	11.715	268.384
Xelaev18003601m	PPIA	851.305	0	634.017	1068.59
Xelaev18003612m	LACTB2	1933.21	1388.26	2328.3	2083.06
Xelaev18003627m	RPL7	43521.1	26312.9	60348.4	43902
Xelaev18003631m	STAU2	753.904	533.306	1324.75	403.656
Xelaev18003640m	IPO11	733.386	40.344	889.473	1270.34
Xelaev18003647m	CWC27	896.68	622.331	1190.3	877.408
Xelaev18003681m	NOP56	2904.98	4475.13	1651.84	2587.97
Xelaev18003685m	WDR54	470.168	408.768	531.567	0
Xelaev18003693m	DOK1	127.442	36.137	230.351	115.837
Xelaev18003694m	MRPS26	2921.13	4516.1	3153.07	1094.21
Xelaev18003696m	DQX1	144.62	0	251.275	37.965
Xelaev18003708m	TTC31	118.944	0	46.396	191.493
Xelaev18003710m	MOGS	1667.58	1441.38	1941.62	1619.76
Xelaev18003717m	HHIPL1	1523.26	0	16.384	3030.14
Xelaev18003721m	MIA2	110.959	59.421	160.687	112.769
Xelaev18003759m	TOMM20	1099.3	1099.3	0	0
Xelaev18003790m	NMRAL1	4860.75	3115.82	8367.62	3098.81
Xelaev18003798m	SMARCA2	25.769	0	25.769	0
Xelaev18003802m	VLDLR	973.677	999.824	184.748	1736.46
Xelaev18003804m	PUM3	395.524	563.439	348.872	274.262
Xelaev18003819m	CDC37L1	166.357	126.497	206.217	0
Xelaev18003840m	DAP	3038.26	1766.92	5017.91	2329.96
Xelaev18003848m	CCT5	18218.7	15114.4	9851.56	29690.2
Xelaev18003854m	INO80C	539.133	320.827	532.736	763.837
Xelaev18003902m	SFXN2	308.377	163.837	691.935	69.359
Xelaev18003904m	CYP17A1	1174.85	141.167	881.193	2502.18
Xelaev18003918m	PDCD11	303.02	307.826	324.78	276.455
Xelaev18003934m	TMEM192	565.341	558.162	578.721	559.14
Xelaev18003942m	TMA16	419.514	591.202	567.439	99.9
Xelaev18003956m	ETHE1	1355.41	2213.46	1184.04	668.741
Xelaev18003960m	XRCC1	112.388	152.789	1.067	183.307
Xelaev18003966m	RPS19	8044.71	20167.9	3880.52	85.761
Xelaev18004029m	MYORG	280.186	0	169.403	390.97
Xelaev18004043m	YARS	2122.97	2474.9	0	1771.04
Xelaev18004046m	RBBP4	607.632	497.057	0	718.208
Xelaev18004050m	AK2	10116.4	22129.1	7586.14	634.101
Xelaev18004054m	MACF1	126.72	222.251	62.706	95.203
Xelaev18004058m	FUCA1	1899.18	156.402	2425.33	3115.82
Xelaev18004059m	GALE	3095.25	2540.22	1003.29	5742.23
Xelaev18004060m	LYPLA2	17241.1	21077.1	9360.44	21285.7
Xelaev18004063m	RPL11	50338.4	47083.3	87655.8	16276.1
Xelaev18004064m	EEF1A1	19385.9	25685.4	0	13086.4
Xelaev18004066m	CAP1	6791.75	8175.29	5778.69	6421.27
Xelaev18004195m	CAPNS1	1175.84	1754.17	909.94	863.419
Xelaev18004200m	KIF17	74.85	0	74.85	0
Xelaev18004219m	ACSBG2	200.586	147.59	190.014	264.156
Xelaev18004220m	HINT2	7376.34	1803.2	5814.56	14511.3
Xelaev18004223m	GBA2	34.835	50.467	0	19.203
Xelaev18004224m	GALT	3081.71	0	2593.92	3569.49
Xelaev18004229m	DCTN3	303.85	0	362.211	245.489
Xelaev18004230m	RPP25L	128.184	0	0	128.184
Xelaev18004235m	TLN1	1027.13	1474.92	1004.27	602.208
Xelaev18004239m	COMMD7	1064.09	239.731	1850.18	1102.34
Xelaev18004256m	DENND6A	291.152	0	202.223	380.082
Xelaev18004257m	SLMAP	221.158	0	146.058	296.258
Xelaev18004259m	FLNB	2923.09	2149.85	3442.89	3176.53
Xelaev18004265m	ANKRD44	205.795	0	240.92	170.67
Xelaev18004373m	RPS24	34006.9	36120.4	65389.3	510.958
Xelaev18004383m	PGLS	1082.87	2527.55	555.914	165.126
Xelaev18004384m	COLGALT1	972.646	444.483	1203.43	1270.03
Xelaev18004402m	VPS11	966.827	364.388	1436	1100.09
Xelaev18004404m	HYOU1	9146.98	4999.82	8618.87	13822.2
Xelaev18004405m	TRAPPC4	362.368	171.527	572.573	343.005
Xelaev18004415m	DDX6	2106.32	767.301	3630.2	1921.47
Xelaev18004422m	HMBS	260.241	320.638	351.987	108.098
Xelaev18004423m	IFT46	200.963	156.027	0	245.899
Xelaev18004428m	CARM1	1737.76	570.385	3550.52	1092.38
Xelaev18004430m	TIMM29	337.087	419.918	207.364	383.978
Xelaev18004433m	LDLR	70.258	0	130.128	10.388
Xelaev18004436m	DOCK7	18.369	9.462	27.36	18.284
Xelaev18004444m	PRKCSH	7821.59	8828.69	5916.11	8719.96
Xelaev18004455m	RPL37A	1302.6	0	2371.81	233.376
Xelaev18004499m	TM9SF3	2544.86	0	2694.09	2395.63
Xelaev18004502m	PPP3CB	1232.28	47.104	758.284	2891.44
Xelaev18004503m	ANXA7	3524.78	3818.3	3976.84	2779.2
Xelaev18004504m	SORBS1	15.253	0	16.723	13.782
Xelaev18004505m	PDLIM1	4969.88	4631.27	3715.51	6562.86
Xelaev18004506m	HELLS	854.063	326.199	889.454	1346.54
Xelaev18004542m	CTF1	103.108	0	121.566	84.65
Xelaev18004555m	TRIM69	2738.49	6285.78	777.095	1152.6
Xelaev18004558m	PRSS8	3124.67	3611.27	3885.65	1877.09
Xelaev18004559m	FUS	794.299	385.687	543.558	1453.65
Xelaev18004586m	WFDC12	1537.46	651.87	0	2423.05
Xelaev18004595m	PURA	3273.01	2994.79	1522.77	5301.49
Xelaev18004597m	HNRNPAB	4941.83	7044.71	1831.84	5948.93
Xelaev18004598m	HNRNPA0	1878.62	4656.74	505.199	473.912
Xelaev18004607m	STK31	955.328	274.547	1752.39	839.048
Xelaev18004667m	PLCG1	86.392	62.663	117.968	78.546
Xelaev18004668m	ZHX3	377.24	387.338	335.803	408.578
Xelaev18004697m	PBRM1	299.239	380.196	305.687	211.834
Xelaev18004698m	GNL3	647.097	1133.13	627.384	180.772
Xelaev18004699m	GLT8D1	453.039	220.077	553.18	585.859
Xelaev18004708m	FANCA	144.989	55.148	202.184	177.635
Xelaev18004711m	MARVELD3	120.299	0	63.94	176.658
Xelaev18004715m	AP1G1	470.478	766.295	163.519	481.621
Xelaev18004719m	TTR	282.907	0	0	282.907
Xelaev18004721m	AFG3L2	853.806	971.069	55.097	1535.25
Xelaev18004742m	SEC62	1158.84	1158.84	0	0
Xelaev18004807m	SUCLG1	7516.91	8994.8	6039.03	0
Xelaev18004827m	FASTKD5	44.628	52.566	48.635	32.684
Xelaev18004837m	ATRN	42.956	0	0	42.956
Xelaev18004845m	SLC4A11	778.505	443.873	824.38	1067.26
Xelaev18004849m	DDRGK1	346.655	0	53.009	640.301
Xelaev18004853m	PAIP2B	2479.72	4582.03	324.267	2532.86
Xelaev18004864m	NAGK	1164.8	946.575	1122.94	1424.87
Xelaev18004865m	EXOC6B	120.188	0	119.794	120.583
Xelaev18004872m	ZNF638	191.924	239.751	146.191	189.832
Xelaev18004878m	C20ORF27	118.334	163.669	148.407	42.927
Xelaev18004894m	DCTN1	2657.59	3112.13	1000.93	3859.72
Xelaev18004896m	PCED1A	292.783	0	218.104	367.462
Xelaev18004903m	SMYD5	488.906	292.539	994.655	179.524
Xelaev18004904m	GLOD5	14722.5	10707.1	20785.9	12674.4
Xelaev18004905m	PRADC1	203.03	0	203.03	0
Xelaev18004907m	CCT7	25207.6	12806.7	38187.2	24629
Xelaev18004916m	RAB11FIP5	665.026	440.975	517.414	1036.69
Xelaev18004917m	SMYD5	341.628	0	0	341.628
Xelaev18004918m	SFXN5	1352.2	546.583	2526.66	983.372
Xelaev18004924m	SPR	7581.7	2768.74	8669.79	11306.6
Xelaev18004984m	IGKC	835.952	160.421	762.053	1585.38
Xelaev18004985m	RPIA	18071.4	14723.3	16323.9	23167.1
Xelaev18004990m	THNSL2	2141.19	0	2337.01	1945.37
Xelaev18004995m	EIF2AK3	78.254	0	68.166	88.342
Xelaev18004998m	RMND5A	60.743	0	70.346	51.14
Xelaev18005003m	KDM3A	832.292	1246.5	643.157	607.222
Xelaev18005005m	IMMT	6311.84	8651.16	6759.45	3524.89
Xelaev18005006m	PTCD3	2751.41	1453.38	4246.84	2554.01
Xelaev18005007m	MRPL35	1983.7	2594.96	2146.26	1209.89
Xelaev18005008m	POLR1A	259.53	87.824	218.609	472.156
Xelaev18005027m	TACC3	1357.71	1444.77	1028.06	1600.32
Xelaev18005032m	LETM1	2783.23	2775.96	1854.56	3719.18
Xelaev18005036m	NELFA	869.025	106.387	2169.69	330.997
Xelaev18005054m	ADD1	290.022	678.782	88.427	102.856
Xelaev18005058m	VIM	2.672	0	2.672	0
Xelaev18005059m	NOP14	423.883	414.701	523.276	333.672
Xelaev18005061m	ITLN2	42398.4	36196.6	66247.9	24750.8
Xelaev18005062m	ITLN2	67093.2	24485.2	156487	20307.3
Xelaev18005064m	HTT	553.934	368.551	750.693	542.558
Xelaev18005070m	LRPAP1	5589.42	4604.44	6916.96	5246.86
Xelaev18005076m	TRMT44	196.538	141.464	358.063	90.086
Xelaev18005077m	ACOX3	1183.31	923.795	1440.99	1185.14
Xelaev18005086m	GRPEL1	6036.15	9620.59	3890.52	4597.35
Xelaev18005096m	MAN2B2	1636.06	773.536	2754.63	1380.01
Xelaev18005098m	WFS1	476.604	1127.58	32.667	269.566
Xelaev18005114m	STX18	676.218	0	643.474	708.962
Xelaev18005119m	ZBTB49	7.953	0	2.316	13.591
Xelaev18005121m	LYAR	335.608	0	0	335.608
Xelaev18005127m	WDR1	14370.8	10484.5	22034.9	10592.9
Xelaev18005135m	RAB28	1250.38	880.834	1505.52	1364.78
Xelaev18005139m	BOD1L1	243.852	260.391	213.544	257.62
Xelaev18005150m	TAPT1	84.583	0	84.583	0
Xelaev18005153m	QDPR	13485.9	6414.27	12825.2	21218.3
Xelaev18005156m	LAP3	40556.6	25381	49051.9	47236.8
Xelaev18005164m	NCAPG	1713.88	2047.13	1053.11	2041.41
Xelaev18005167m	PACRGL	1063.61	343.565	1747.53	1099.72
Xelaev18005171m	GBA3	249.846	0	82.108	417.584
Xelaev18005175m	DHX15	1100.08	0	687.897	1512.27
Xelaev18005180m	SEPSECS	813.631	105.161	828.801	1506.93
Xelaev18005181m	PI4K2B	546.121	153.156	530.105	955.103
Xelaev18005182m	ANAPC4	911.57	363.934	1268.11	1102.67
Xelaev18005187m	SMIM20	6534.07	6534.07	0	0
Xelaev18005191m	TBC1D19	55.447	0	56.567	54.326
Xelaev18005204m	PGM2	2044.02	2494.9	1582.51	2054.65
Xelaev18005211m	FAM114A1	3447.31	4690.72	1210.88	4440.34
Xelaev18005214m	WDR19	71.389	85.468	70.768	57.933
Xelaev18005215m	RFC1	1424.38	1502.51	1352.42	1418.19
Xelaev18005217m	RPL9	3065.99	8736.58	0.689	460.712
Xelaev18005219m	UGDH	2936.4	0	4620.07	1252.72
Xelaev18005223m	PDS5A	18.52	16.334	20.705	0
Xelaev18005235m	UCHL1	22955.4	29214.9	33489.3	6161.99
Xelaev18005236m	LIMCH1	138.647	0	122.036	155.257
Xelaev18005239m	SLC30A9	775.477	656.506	967.827	702.097
Xelaev18005243m	ATP8A1	14.066	0	15.267	12.865
Xelaev18005247m	GNPDA2	6084.45	2913.94	7415.66	7923.73
Xelaev18005248m	GUF1	1070.18	637.573	954.506	1618.46
Xelaev18005258m	NFXL1	27.461	40.183	0	14.738
Xelaev18005268m	OCIAD1	1781.52	640.455	4622.64	81.455
Xelaev18005270m	OCIAD2	672.189	486.304	0	858.073
Xelaev18005278m	SCFD2	1382.63	521.418	2055.28	1571.19
Xelaev18005280m	FIP1L1	142.359	78.962	183.773	164.342
Xelaev18005300m	CEP135	20.955	0	20.955	0
Xelaev18005303m	AASDH	21.266	0	37.856	4.677
Xelaev18005304m	PAICS	104.479	0	136.325	72.633
Xelaev18005305m	PAICS	9277.94	16204.1	1633.27	9996.4
Xelaev18005306m	PPAT	1058.16	0	991.498	1124.83
Xelaev18005320m	VPS37A	649.464	661.131	730.919	556.343
Xelaev18005325m	MTUS1	636.93	0	745.361	528.498
Xelaev18005328m	PCM1	1197.07	1153.08	1397.88	1040.23
Xelaev18005329m	GTF2E1	295.634	0	0	295.634
Xelaev18005330m	ASAH1	1417.27	223.825	2291.03	1736.94
Xelaev18005332m	FRG1	752.21	1062.29	438.921	755.419
Xelaev18005339m	KLKB1	230.349	262.846	90.834	337.366
Xelaev18005341m	CYP4V2	181.165	0	121.169	241.16
Xelaev18005346m	SORBS2	44.133	0	67.392	20.874
Xelaev18005350m	UFSP2	2549.12	519.657	3179.47	3948.23
Xelaev18005353m	CFAP97	176.223	114.159	209.918	204.593
Xelaev18005359m	ACSL1	3028.01	3316.55	1206.68	4560.8
Xelaev18005361m	CENPU	101.222	0	122.43	80.014
Xelaev18005371m	ENPP6	826.035	462.099	1453.47	562.538
Xelaev18005377m	TRAPPC11	63.246	0	107.151	19.341
Xelaev18005378m	RWDD4	672.296	672.296	0	0
Xelaev18005385m	CDKN2AIP	21.431	0	21.431	0
Xelaev18005389m	DCTD	4445.96	4138.05	3442.34	5757.5
Xelaev18005393m	AGA	1492.88	0	1787.84	1197.92
Xelaev18005394m	NEIL3	30.051	0	45.092	15.011
Xelaev18005396m	SPCS3	6752.64	2121.04	6730.09	11406.8
Xelaev18005404m	CEP44	471.99	359.354	545.254	511.361
Xelaev18005411m	HMGB2	12482.1	19160.3	13714.5	4571.5
Xelaev18005412m	GALNT7	311.294	430.205	0	192.382
Xelaev18005417m	HPF1	981.517	1276.04	1007.25	661.264
Xelaev18005419m	NEK1	133.278	299.968	48.274	51.592
Xelaev18005422m	CBR4	821.175	626.726	650.886	1185.91
Xelaev18005424m	PALLD	8.039	0	8.039	0
Xelaev18005431m	TRIM7	27.852	0	27.852	0
Xelaev18005436m	NAF1	1455.14	1388.81	0	1521.47
Xelaev18005443m	PPID	3286.6	2624.04	3211.47	4024.3
Xelaev18005444m	ETFDH	3139.96	4242.98	2015.07	3161.82
Xelaev18005464m	Xelaev18005464m	2439.16	1337.75	3340.61	2639.12
Xelaev18005478m	MND1	1574.62	1769.39	2355.7	598.754
Xelaev18005479m	TRIM2	348.722	0	506.819	190.626
Xelaev18005483m	ARFIP1	1483.05	1318.51	1821.36	1309.27
Xelaev18005493m	GATB	225.028	0	414.185	35.871
Xelaev18005496m	SH3D19	84.18	17.985	202.147	32.408
Xelaev18005497m	RPS3A	8136.6	6405.69	6.747	17997.4
Xelaev18005498m	LRBA	556.328	452.876	594.68	621.429
Xelaev18005506m	PRMT9	554.82	0	602.282	507.357
Xelaev18005522m	MMAA	18.783	0	0	18.783
Xelaev18005530m	ABCE1	1333.41	545.938	1192.77	2261.51
Xelaev18005531m	OTUD4	120.374	191.503	101.645	67.973
Xelaev18005549m	ELMOD2	1246.16	2090.01	744.69	903.791
Xelaev18005551m	CLGN	225.129	0	225.129	0
Xelaev18005560m	SETD7	457.614	494.41	441.561	436.872
Xelaev18005568m	NAA15	756.409	1604.85	452.34	212.036
Xelaev18005576m	MGARP	3493.63	0	0	3493.63
Xelaev18005588m	SCLT1	156.825	0	286.727	26.922
Xelaev18005590m	PGRMC2	632.086	504.726	548.266	843.267
Xelaev18005591m	LARP1B	202.475	143.982	106.573	356.871
Xelaev18005593m	ABHD18	85.537	0	67.219	103.856
Xelaev18005594m	MFSD8	127.938	134.074	121.802	0
Xelaev18005603m	SPATA5	144.432	0	148.251	140.613
Xelaev18005605m	NUDT6	121.82	0	113.669	129.971
Xelaev18005613m	ADAD1	394.504	464.986	620.868	97.658
Xelaev18005619m	BBS7	457.141	0	604.333	309.948
Xelaev18005621m	EXOSC9	1782.49	806.584	1053.58	3487.31
Xelaev18005622m	ANXA5	14903.7	21063.6	21067.9	2579.75
Xelaev18005624m	HADH	29624.4	36501.1	25513.7	26858.4
Xelaev18005634m	SEC24B	418.476	125.776	836.759	292.893
Xelaev18005635m	MCUB	1705.65	2761.2	1587.18	768.566
Xelaev18005638m	FAM241A	915.221	0	1120.21	710.228
Xelaev18005653m	CASP6	3849.93	2159.35	6159.72	3230.73
Xelaev18005658m	ZGRF1	32.81	0	32.81	0
Xelaev18005659m	LARP7	652.548	589.417	397.92	970.306
Xelaev18005683m	C4ORF3	1098.62	0	509.64	1687.6
Xelaev18005694m	PAPSS1	143.038	0	0	143.038
Xelaev18005697m	AIMP1	5926.95	4341.88	11083.1	2355.86
Xelaev18005698m	TBCK	296.055	0	508.464	83.645
Xelaev18005701m	GSTCD	75.733	97.787	44.632	84.779
Xelaev18005702m	INTS12	102.104	0	176.222	27.985
Xelaev18005705m	PPA2	5626.47	7619.18	5221.85	4038.39
Xelaev18005713m	CENPE	292.825	218.853	487.377	172.246
Xelaev18005714m	DPY19L1	91.69	0	91.69	0
Xelaev18005716m	BDH2	10221.7	5635.77	9458.18	15571.1
Xelaev18005720m	MANBA	692.024	229.153	1099.55	747.373
Xelaev18005728m	PPP3CA	1272.94	1001.69	2580.53	236.594
Xelaev18005734m	LAMTOR3	231.504	379.691	83.317	0
Xelaev18005748m	ADH5	9170.49	5042.38	9199.66	13269.4
Xelaev18005749m	METAP1	864.876	1192	719.11	683.521
Xelaev18005751m	EIF4E	6841.41	8022.48	10769.6	1732.11
Xelaev18005753m	RAP1GDS1	1539.74	1676.07	836.312	2106.82
Xelaev18005766m	HPGDS	5709.66	11944.1	2823.19	2361.66
Xelaev18005767m	SMARCAD1	916.43	988.322	902.074	858.893
Xelaev18005787m	FAM13A	269.505	0	269.505	0
Xelaev18005790m	HERC3	35.375	0	32.266	38.484
Xelaev18005795m	RUFY3	149.907	158.937	113.064	177.721
Xelaev18005800m	PKD2	59.637	0	98.805	20.468
Xelaev18005809m	G3BP2	1538.88	0	0	1538.88
Xelaev18005812m	USO1	593.386	593.801	706.468	479.891
Xelaev18005834m	ALB	253.433	0	338.816	168.05
Xelaev18005835m	ALB	462.104	348.355	580.474	457.483
Xelaev18005836m	ALB	707.044	440.834	1429.34	250.96
Xelaev18005837m	ANKRD17	14.416	25.731	11.141	6.375
Xelaev18005838m	COX18	168.623	0	116.241	221.006
Xelaev18005847m	NAAA	43.231	0	43.231	0
Xelaev18005848m	NAAA	153.204	0	153.204	0
Xelaev18005850m	NUP54	594.048	194.725	408.112	1179.31
Xelaev18005851m	SCARB2	176.437	0	100.896	251.979
Xelaev18005855m	STBD1	3580.15	5035.47	4152.95	1552.03
Xelaev18005861m	2019-09-11	94.331	94.331	0	0
Xelaev18005868m	MRPL1	2721.39	2990.18	2996.57	2177.41
Xelaev18005871m	ANXA3	22950.2	18829.2	14368.6	35652.8
Xelaev18005880m	PRC1	52.687	34.8	66.974	56.286
Xelaev18005883m	DCTN6	2862.91	2577.07	2088.32	3923.34
Xelaev18005888m	GTF2E2	784.225	760.917	940.069	651.688
Xelaev18005891m	GSR	617.344	107.241	900.675	844.115
Xelaev18005894m	COPS4	6672.7	2349.94	10773.2	6894.98
Xelaev18005895m	PRAG1	33.369	0	0	33.369
Xelaev18005899m	CENPC	100.857	0	122.839	78.874
Xelaev18005901m	UBA6	6974.19	3100.1	8520	9302.48
Xelaev18005902m	COQ2	78.248	0	140.693	15.803
Xelaev18005910m	HPSE	139.64	141.319	114.245	163.357
Xelaev18005920m	HNRNPDL	3114.31	7222.39	115.631	2004.91
Xelaev18005922m	HNRNPD	1281.21	3135.03	71.084	637.522
Xelaev18005925m	PTPN13	10.63	0	10.63	0
Xelaev18005929m	KLHL8	424.744	0	424.744	0
Xelaev18005930m	BLVRB	1220.07	498.59	2039.42	1122.2
Xelaev18005996m	SEC31A	89.5	106.6	108.817	53.082
Xelaev18006000m	CREB3L3	488.853	0	488.853	0
Xelaev18006010m	CTU1	386.73	662.472	307.401	190.315
Xelaev18006011m	METTL14	696.15	696.15	0	0
Xelaev18006024m	UHRF1	633.586	644.851	354.907	901.001
Xelaev18006056m	NOA1	814.372	90.999	668.491	1683.62
Xelaev18006062m	HNRNPM	1735.48	1288.32	2018.09	1900.04
Xelaev18006073m	TIMM13	8028.06	4076.35	8210.73	11797.1
Xelaev18006082m	EEF2	24027.7	51994.1	17318.1	2770.96
Xelaev18006092m	APBA3	450.013	322.805	0	577.221
Xelaev18006094m	TJP3	89.172	90.027	74.228	103.262
Xelaev18006100m	MYDGF	5384.5	8066.79	3302.24	4784.47
Xelaev18006101m	DPP9	726.897	654.737	844.126	681.827
Xelaev18006105m	PLIN3	2531.92	1140.6	2375.54	4079.62
Xelaev18006106m	HDGFL2	496.576	821.788	265.916	402.023
Xelaev18006108m	CHAF1A	1185.91	811.258	1182.07	1564.4
Xelaev18006109m	SH3GL1	1470.91	2269.44	1330.05	813.231
Xelaev18006122m	DNAJA1	2114.69	1852.61	549.697	3941.77
Xelaev18006123m	APTX	689.173	1680.08	166.499	220.936
Xelaev18006124m	KCMF1	123.49	0	123.49	0
Xelaev18006148m	POMK	219.881	0	66.917	372.846
Xelaev18006150m	INTS10	306.081	0	385.17	226.992
Xelaev18006155m	SH2D4A	118.888	0	192.398	45.378
Xelaev18006174m	WRN	551.007	188.687	747.258	717.075
Xelaev18006181m	DOHH	1897.9	1508.07	1454.07	2731.57
Xelaev18006193m	MBD3	1040.58	952.548	0	1128.6
Xelaev18006196m	AP1M1	486.747	954.933	0	18.561
Xelaev18006206m	ATP5ME	918.787	918.787	0	0
Xelaev18006207m	CWF19L1	1872.34	1793.97	983.672	2839.37
Xelaev18006210m	GNG7	262.922	0	262.922	0
Xelaev18006214m	SGTA	3844.35	5907.28	1276.04	4349.74
Xelaev18006216m	THOP1	1441.98	0	1443.05	1440.92
Xelaev18006219m	CTDSPL2	117.715	0	102.285	133.145
Xelaev18006221m	REEP6	2206.84	1292.58	4678.3	649.638
Xelaev18006222m	C19ORF25	973.285	772.218	225.944	1921.69
Xelaev18006228m	DAZAP1	591.624	0	125.456	1057.79
Xelaev18006229m	GAMT	16239.6	30203.9	15504.5	3010.3
Xelaev18006231m	MUM1L1	70.119	66.041	55.351	88.966
Xelaev18006236m	CIRBP	57194.7	46520.8	74434.5	50628.9
Xelaev18006250m	GPX4	15082.1	4622.27	17628.8	22995.2
Xelaev18006255m	WDR18	264.354	285.258	163.794	344.01
Xelaev18006266m	PTBP1	1533.88	921.781	2335.64	1344.23
Xelaev18006269m	PALM	32.337	0	0	32.337
Xelaev18006283m	IGLL5	170.366	0	170.366	0
Xelaev18006288m	NDUFA7	6292.25	14486.9	785.495	3604.39
Xelaev18006296m	LONP1	2428.32	3652.14	2636.72	996.102
Xelaev18006303m	RANBP3	787.569	419.302	635.787	1307.62
Xelaev18006306m	RFX2	82.122	0	81.093	83.152
Xelaev18006307m	ACSBG2	1679.65	1851.96	1966.97	1220.03
Xelaev18006314m	ANP32B	4883.54	426.05	5952.91	8271.65
Xelaev18006332m	Xelaev18006332m	12001.1	12953.6	634.476	22415.2
Xelaev18006342m	AP3D1	907.46	0	179.233	1635.69
Xelaev18006353m	ANKLE1	14.658	0	24.312	5.003
Xelaev18006354m	LAGE3	977.439	0	1031.81	923.067
Xelaev18006368m	LSM4	4916.97	4916.97	0	0
Xelaev18006379m	IFI30	6826.24	6826.24	0	0
Xelaev18006386m	FAM32A	476.947	612.748	341.146	0
Xelaev18006390m	TPM4	1526.29	2041.14	961.204	1576.52
Xelaev18006393m	TSPAN3	1116.8	874.785	0	1358.81
Xelaev18006394m	ELAVL1	964.708	1430.44	498.974	0
Xelaev18006400m	SAFB2	1298.92	1298.92	0	0
Xelaev18006445m	MIER2	56.643	0	0	56.643
Xelaev18006459m	POLRMT	355.637	58.035	591.464	417.413
Xelaev18006472m	ISYNA1	142.386	0	225.577	59.195
Xelaev18006474m	FKBP8	3281.5	4207.31	3229.82	2407.36
Xelaev18006477m	REX1BD	1191.06	0	1056.76	1325.37
Xelaev18006488m	ADH1B	5726.23	3167.77	7754.75	6256.19
Xelaev18006491m	TDRD7	675.352	225.505	1140.57	659.977
Xelaev18006494m	NCBP1	303.917	229.59	628.769	53.392
Xelaev18006502m	ANP32B	6995.43	4036.38	8488.45	8461.45
Xelaev18006504m	ECPAS	1857.26	1116.22	2200.14	2255.4
Xelaev18006505m	SMC2	4668.88	3973.61	7137.17	2895.85
Xelaev18006511m	PTBP3	126.545	0	189.358	63.732
Xelaev18006517m	SNX30	1206.36	631.955	1615.43	1371.69
Xelaev18006524m	Xelaev18006524m	9169.59	5693.53	5351.99	16463.3
Xelaev18006528m	TOMM5	2892.5	0	2892.5	0
Xelaev18006530m	POLR1E	289.27	266.377	552.484	48.949
Xelaev18006532m	GRHPR	34009.2	65422.4	34072.8	2532.27
Xelaev18006533m	GRHPR	529.597	1041.8	0	17.395
Xelaev18006543m	MELK	586.527	346.505	583.507	829.568
Xelaev18006547m	NANS	4200.85	5304.05	3694.43	3604.08
Xelaev18006549m	CLTA	2697.17	2611.86	2782.49	0
Xelaev18006565m	MAP1S	1747.38	1173.09	1286.85	2782.2
Xelaev18006575m	SLC5A5	264.544	0	264.544	0
Xelaev18006576m	CCDC124	2946.68	3255.02	2046.1	3538.91
Xelaev18006581m	BABAM1	1054.86	1711.98	1211.07	241.514
Xelaev18006584m	USE1	955.026	538.753	880.208	1446.12
Xelaev18006588m	CPAMD8	65.497	0	32.959	98.035
Xelaev18006589m	HAUS8	1112.78	436.341	1340.48	1561.52
Xelaev18006592m	ARL9	511.099	864.22	542.044	127.032
Xelaev18006599m	HOOK3	21.599	0	21.599	0
Xelaev18006605m	DDA1	971.417	729.677	995.022	1189.55
Xelaev18006612m	EXOSC3	682.988	669.871	873.771	505.321
Xelaev18006614m	GATAD2A	796.785	697.54	338.972	1353.84
Xelaev18006617m	SUGP1	280.97	53.96	300.218	488.732
Xelaev18006627m	TMEM161A	251.349	0	351.605	151.093
Xelaev18006628m	SLC25A42	152.247	0	149.171	155.323
Xelaev18006629m	ARMC6	1201.62	1562.41	1150.83	891.612
Xelaev18006630m	SUGP2	402.595	597.215	235.875	374.694
Xelaev18006631m	MIC13	5033.05	5672.53	1359.13	8067.5
Xelaev18006638m	NCLN	1192.64	799.617	1366.5	1411.81
Xelaev18006642m	TLE1	258.281	0	277.57	238.991
Xelaev18006663m	COPE	7570.65	2205.01	12788.7	7718.24
Xelaev18006667m	EPS15L1	152.275	172.618	47.698	236.509
Xelaev18006673m	CHERP	397.085	806.277	281.991	102.985
Xelaev18006675m	MED26	61.527	0	116.26	6.793
Xelaev18006682m	NDUFB6	8721.61	8237.7	5342.47	12584.6
Xelaev18006685m	PTGR1	30151	21635.3	31021	37796.6
Xelaev18006686m	PTGR1	1510.76	708.207	3136.89	687.189
Xelaev18006687m	PTGR1	119.84	0	159.005	80.675
Xelaev18006702m	TXN	12329	6996.44	22915.7	7075.04
Xelaev18006711m	ACO1	1146.96	958.108	686.092	1796.69
Xelaev18006717m	SH3GL2	611.578	287.387	935.769	0
Xelaev18006721m	HAUS6	145.826	70.018	163.54	203.922
Xelaev18006722m	DENND4C	222.245	80.62	388.249	197.867
Xelaev18006725m	PLIN2	40963.7	46199	53660	23032.2
Xelaev18006727m	RPS6	6337.65	17901.6	425.162	686.153
Xelaev18006732m	FOCAD	952.219	419.555	1435.9	1001.21
Xelaev18006738m	NIPSNAP3A	3510.63	2418.22	4462.14	3651.53
Xelaev18006741m	SLC44A1	248.167	0	0	248.167
Xelaev18006746m	ZNF462	25.503	44.102	18.006	14.4
Xelaev18006748m	RAD23B	7622.05	8031.47	13182.2	1652.48
Xelaev18006752m	MTAP	12405	6163.23	24373.5	6678.25
Xelaev18006765m	PLAA	1765.41	949.629	2080.16	2266.44
Xelaev18006769m	REXO1	130.826	74.921	213.803	103.753
Xelaev18006771m	C9ORF72	448.285	0	448.285	0
Xelaev18006797m	TTC39B	2564.71	1047.99	3437.42	3208.73
Xelaev18006806m	TYRP1	13488	0	10781.6	16194.5
Xelaev18006819m	FXN	2271.04	2500.5	2799.61	1513.02
Xelaev18006821m	ERMP1	2095.57	280.908	3584.31	2421.5
Xelaev18006822m	RIC1	189.341	0	217.254	161.429
Xelaev18006825m	PLGRKT	5178.44	0	4257.18	6099.7
Xelaev18006826m	RLN3	208.582	0	302.263	114.901
Xelaev18006829m	RCL1	400.738	0	0	400.738
Xelaev18006831m	CDC37L1	829.596	413.134	1084.13	991.52
Xelaev18006841m	PUM3	203.961	232.861	251.176	127.847
Xelaev18006844m	VLDLR	761.214	596.453	1076.02	611.166
Xelaev18006851m	KANK1	66.328	68.829	63.828	0
Xelaev18006854m	CBWD2	3025.08	2585.26	3405.28	3084.7
Xelaev18006871m	TJP2	650.652	1275.52	673.836	2.602
Xelaev18006873m	TJP2	386.359	767.17	81.558	310.348
Xelaev18006885m	TMEM2	416.988	0	358.802	475.173
Xelaev18006886m	ABHD17B	221.46	0	0	221.46
Xelaev18006895m	ANXA1	5165.53	10281.6	1966.18	3248.76
Xelaev18006896m	ANXA1	548.524	283.388	949.178	413.006
Xelaev18006900m	C9ORF40	429.748	0	0	429.748
Xelaev18006903m	OSTF1	384.872	761.622	0	8.122
Xelaev18006910m	GCNT1	74.654	0	0	74.654
Xelaev18006916m	VPS13A	297.207	153.05	415.799	322.773
Xelaev18006921m	PSAT1	8550.26	7599.5	10799.9	7251.39
Xelaev18006927m	C15ORF40	205.675	0	0	205.675
Xelaev18006928m	UBQLN1	5.225	0	5.225	0
Xelaev18006929m	IDNK	211.215	0	381.427	41.003
Xelaev18006931m	HNRNPK	1130.53	724.269	2215.59	451.715
Xelaev18006932m	RMI1	87.393	0	90.11	84.675
Xelaev18006937m	NAA35	253.872	34.416	451.371	275.828
Xelaev18006943m	ISCA1	2103.47	2003.24	240.214	4066.97
Xelaev18006949m	CTSL	1363.95	1912.05	1891.87	287.919
Xelaev18006950m	FBP2	4998.9	922.222	7065.22	7009.26
Xelaev18006959m	HSD17B3	24.796	0	24.796	0
Xelaev18006966m	HABP4	27115.2	28867.3	29512.2	22966.2
Xelaev18006978m	SASS6	1147.24	471.731	1428.07	1541.92
Xelaev18006990m	SEMA4D	51.874	0	0	51.874
Xelaev18007000m	AUH	342.628	644.009	12.888	370.985
Xelaev18007003m	SPTLC1	977.278	1394.18	94.227	1443.43
Xelaev18007005m	RABGGTA	2032.54	1411.19	1811.96	2874.47
Xelaev18007010m	TM9SF1	244.48	253.078	362.016	118.344
Xelaev18007012m	IPO4	1400.24	1151.25	1125.73	1923.74
Xelaev18007018m	PSME2	4138.82	0	4138.82	0
Xelaev18007019m	EMC9	236.338	0	351.082	121.594
Xelaev18007020m	PSME1	5421.09	6380.28	8982.94	900.053
Xelaev18007022m	DCAF11	183.996	0	332.465	35.527
Xelaev18007023m	PCK2	2596.02	4093.44	1751.49	1943.13
Xelaev18007032m	PABPN1	609.79	667.087	552.493	0
Xelaev18007038m	NGDN	242.041	177.207	0	306.876
Xelaev18007044m	DHRS4	2229.17	702.795	1961.57	4023.15
Xelaev18007055m	PRMT5	5669.16	3060.26	8505.81	5441.4
Xelaev18007056m	HAUS4	1008.05	502.202	791.665	1730.3
Xelaev18007059m	PSMB5	28683.4	0	24139.3	33227.5
Xelaev18007064m	ACIN1	224.889	444.122	0	5.655
Xelaev18007066m	C14ORF119	307.104	268.714	115.613	536.986
Xelaev18007070m	OXA1L	2359.19	2004.81	2410.09	2662.68
Xelaev18007073m	IGHG4	2034.51	870.838	2255.95	2976.74
Xelaev18007075m	IGHM	102.439	0	34.165	170.713
Xelaev18007079m	IGHM	412.027	76.772	920.628	238.682
Xelaev18007083m	IGHV4-59	212.452	0	212.452	0
Xelaev18007211m	DAD1	1986.05	0	730.98	3241.12
Xelaev18007305m	METTL3	570.154	968.804	533.369	208.29
Xelaev18007306m	TOX4	522.613	0	522.613	0
Xelaev18007307m	RAB2B	902.575	902.953	656.564	1148.21
Xelaev18007308m	CHD8	196.207	0	242.554	149.86
Xelaev18007309m	SUPT16H	305.385	451.584	178.266	286.304
Xelaev18007329m	CYLD	29.175	0	0	29.175
Xelaev18007331m	PNP	377.973	663.798	108.669	361.452
Xelaev18007338m	DNAJA1	1604.8	2713.51	1474.19	626.701
Xelaev18007341m	TTC5	918.034	305.148	1505.16	943.791
Xelaev18007345m	EMC4	1552.47	485.643	2389.36	1782.42
Xelaev18007346m	METTL17	1202.8	1097.84	1618.7	891.849
Xelaev18007350m	OSGEP	2217.06	1406.92	1625.15	3619.12
Xelaev18007351m	APEX1	1712.08	1928.29	160.151	3047.79
Xelaev18007377m	TEP1	239.086	244.674	226.199	246.385
Xelaev18007378m	HNRNPC	975.83	1338	475.954	1113.53
Xelaev18007381m	NDRG2	170.086	74.214	0	265.957
Xelaev18007387m	SMTN	115.832	154.72	89.035	103.742
Xelaev18007393m	POLE	835.987	403.622	803.071	1301.27
Xelaev18007395m	PXMP2	827.152	0	272.005	1382.3
Xelaev18007396m	PES1	334.255	277.41	391.1	0
Xelaev18007399m	ZP3	417.198	261.118	312.612	677.864
Xelaev18007400m	MTFP1	3024.98	0	1311.04	4738.92
Xelaev18007403m	SF3A1	1883.41	1054.04	2769.68	1826.52
Xelaev18007404m	TBC1D10A	289.232	137.994	331.541	398.161
Xelaev18007405m	CASTOR1	171.807	0	222.705	120.91
Xelaev18007410m	ACADVL	2039.18	733.027	2580.71	2803.8
Xelaev18007411m	MTMR3	20.176	20.176	0	0
Xelaev18007419m	THOC5	451.473	121.388	545.196	687.834
Xelaev18007420m	AP1B1	1821.36	228.707	1316.74	3918.61
Xelaev18007424m	EWSR1	1951.48	3939.05	968.336	947.047
Xelaev18007432m	DDX54	174.751	277.89	71.613	0
Xelaev18007442m	RBM19	206.718	341.813	214.317	64.024
Xelaev18007449m	PLBD2	8449.96	1763.09	16313.2	7273.57
Xelaev18007454m	SART3	1015.13	1528.69	596.191	920.511
Xelaev18007455m	UNG	1960.6	890.741	3362.61	1628.44
Xelaev18007456m	USP30	93.903	0	45.268	142.538
Xelaev18007458m	DAO	2937.14	2461.66	960.826	5388.93
Xelaev18007460m	SSH1	79.595	0	83.942	75.248
Xelaev18007461m	CORO1C	1622.57	2711.97	1863.74	291.992
Xelaev18007465m	ISCU	2428.3	3342.66	390.637	3551.61
Xelaev18007467m	ACACB	108.989	18.232	197.544	111.191
Xelaev18007472m	ALDH3B1	324.446	118.535	513.262	341.542
Xelaev18007473m	MMAB	8670.9	677.262	606.36	24729.1
Xelaev18007474m	MVK	1997.73	586.601	2032.6	3374
Xelaev18007480m	GLTP	1080.28	1701.62	1092.94	446.275
Xelaev18007483m	GIT2	284.066	467.989	100.143	0
Xelaev18007484m	ANKRD13A	125.022	279.806	55.076	40.183
Xelaev18007490m	KIAA1671	152.381	451.228	0.636	5.279
Xelaev18007501m	HPS4	37.289	0	55.908	18.67
Xelaev18007502m	SRRD	187.664	125.599	79.712	357.682
Xelaev18007507m	RDH11	744.96	85.723	1073.55	1075.61
Xelaev18007525m	PITPNB	2301.05	2505.17	2096.93	0
Xelaev18007530m	CHEK2	222.991	261.169	184.813	0
Xelaev18007531m	CHEK2	1185.74	789.156	1475.27	1292.78
Xelaev18007532m	HSCB	507.618	598.779	416.458	0
Xelaev18007536m	PRODH	1470.71	1201.56	1222.64	1987.93
Xelaev18007542m	PRKAB1	108.235	201.825	0	14.645
Xelaev18007543m	CIT	174.396	53.163	252.764	217.262
Xelaev18007545m	RAB35	300.308	440.562	160.054	0
Xelaev18007546m	GCN1	1625.13	617.052	2602.29	1656.06
Xelaev18007547m	RPLP0	661.5	730.438	1078.52	175.545
Xelaev18007555m	COX6A1	17749.9	24297	25148.6	3803.94
Xelaev18007557m	GATC	330.071	0	344.575	315.568
Xelaev18007558m	SRSF9	553.552	0	1062.44	44.661
Xelaev18007559m	DYNLL1	4408.84	4408.84	0	0
Xelaev18007560m	COQ5	2132.88	1218.09	3371.76	1808.79
Xelaev18007561m	RNF10	156.11	66.096	166.604	235.629
Xelaev18007565m	MLEC	1277.11	2475.91	78.313	0
Xelaev18007567m	UNC119B	76.689	0	85.82	67.558
Xelaev18007570m	ACADS	14213.3	7982.97	18988.5	15668.4
Xelaev18007576m	LIMK2	201.827	0	163.467	240.187
Xelaev18007579m	DRG1	3532.43	2914.71	1738.64	5943.94
Xelaev18007581m	EIF4ENIF1	671.466	70.966	909.431	1034
Xelaev18007583m	SFI1	14.491	0	17.132	11.85
Xelaev18007584m	PISD	3384.71	2245.12	4442.77	3466.24
Xelaev18007586m	PRR14L	29.202	23.452	51.666	12.487
Xelaev18007587m	DEPDC5	50.914	43.072	58.757	0
Xelaev18007590m	RSPH14	174.561	0	296.553	52.569
Xelaev18007598m	SNRPD3	2442.19	2442.19	0	0
Xelaev18007603m	SMPD4	1404.88	0	1643.38	1166.38
Xelaev18007606m	MED15	251.069	0	495.739	6.399
Xelaev18007607m	SIRT4	283.082	62.169	524.88	262.198
Xelaev18007611m	CRKL	162.961	0	82.867	243.054
Xelaev18007614m	CABIN1	134.589	13.577	185.086	205.104
Xelaev18007617m	DDT	89.996	0	89.996	0
Xelaev18007619m	GSTT1	30530.5	27926.4	38427.6	25237.6
Xelaev18007621m	GSTT1	68.582	0	68.582	0
Xelaev18007623m	DDX51	132.672	256.18	109.341	32.494
Xelaev18007633m	IGLV5-37	591.568	0	1146.7	36.439
Xelaev18007662m	IGLV3-21	211.242	0	211.242	0
Xelaev18007665m	IGLC7	253.116	253.116	0	0
Xelaev18007671m	ESS2	32.451	0	38.09	26.813
Xelaev18007675m	SLC25A1	140.707	302.512	63.448	56.16
Xelaev18007676m	CLTCL1	358.958	202.942	350.544	523.389
Xelaev18007677m	SNAP29	696.467	1583.42	180.491	325.492
Xelaev18007679m	SERPIND1	120.653	0	0	120.653
Xelaev18007681m	HIC2	105.351	105.351	0	0
Xelaev18007683m	YDJC	699.663	0	1230.13	169.191
Xelaev18007684m	SDF2L1	1784.38	1264.37	2373.54	1715.23
Xelaev18007688m	TOP3B	350.99	171.741	378.256	502.973
Xelaev18007694m	UFD1	620.465	1261.91	181.579	417.908
Xelaev18007695m	CDC45	277.278	0	233.122	321.434
Xelaev18007703m	GNB1L	168.799	0	214.585	123.012
Xelaev18007708m	ARVCF	146.056	160.122	160.322	117.724
Xelaev18007709m	TANGO2	634.59	275.465	731.702	896.604
Xelaev18007710m	DGCR8	681.706	141.779	896.032	1007.31
Xelaev18007711m	DGCR8	243.767	0	135.924	351.61
Xelaev18007712m	TRMT2A	240.55	152.12	328.98	0
Xelaev18007714m	RANBP1	5543.28	9942.43	144.74	6542.68
Xelaev18007716m	PGAM5	942.295	0	1223.71	660.879
Xelaev18007717m	ANKLE2	247.236	295.195	275.161	171.351
Xelaev18007718m	GOLGA3	177.831	0	252.814	102.847
Xelaev18007720m	CHFR	101.878	80.869	6.112	218.654
Xelaev18007733m	EP400	81.945	0	91.248	72.642
Xelaev18007736m	SFSWAP	58.722	0	0	58.722
Xelaev18007743m	STX2	160.553	0	97.515	223.59
Xelaev18007746m	PIWIL1	40.061	0	44.777	35.344
Xelaev18007751m	GLT1D1	19.161	0	33.459	4.862
Xelaev18007752m	SLC15A4	556.019	249.544	542.69	875.823
Xelaev18007760m	DHX37	261.08	198.045	400.99	184.204
Xelaev18007762m	SCARB1	273.965	0	223.357	324.573
Xelaev18007770m	DNAH10	90.454	0	152.19	28.719
Xelaev18007772m	ATP6V0A2	1357.4	0	2537.3	177.507
Xelaev18007775m	GTF2H3	152.384	124.968	0	179.801
Xelaev18007776m	EIF2B1	4583.86	1569.12	8647.71	3534.75
Xelaev18007782m	RILPL2	182.517	0	11.81	353.224
Xelaev18007784m	SBNO1	134.252	0	0	134.252
Xelaev18007785m	CDK2AP1	910.295	0	406.261	1414.33
Xelaev18007789m	ARL6IP4	81.756	95.007	0	68.504
Xelaev18007793m	VPS37B	2029.73	1059.26	4244.44	785.485
Xelaev18007794m	HIP1R	489.806	328.366	412.205	728.848
Xelaev18007798m	DENR	10820.8	9649.54	12123.1	10689.8
Xelaev18007801m	KNTC1	750.584	142.211	1251.6	857.939
Xelaev18007802m	RSRC2	83.096	0	129.514	36.677
Xelaev18007805m	CLIP1	387.451	451.58	409.668	301.106
Xelaev18007808m	VPS33A	116.521	51.039	182.004	0
Xelaev18007809m	DIABLO	1147.33	510.793	1490.24	1440.95
Xelaev18007814m	MLXIP	18.902	0	13.942	23.862
Xelaev18007817m	PSMD9	3090.67	3283.77	3071.53	2916.72
Xelaev18007823m	TMEM120B	1053.13	1857.34	1100.5	201.555
Xelaev18007828m	RNF34	285.506	0	41.512	529.5
Xelaev18007829m	ANAPC5	478.191	0	615.816	340.565
Xelaev18007833m	P2RX4	1259.17	1261.97	1452.82	1062.73
Xelaev18007835m	IFT81	132.199	0	55.399	208.999
Xelaev18007836m	ATP2A2	2049.29	1901.81	2636.88	1609.18
Xelaev18007839m	ANAPC7	291.22	272.2	0	310.239
Xelaev18007841m	GPN3	268.971	0	361.804	176.139
Xelaev18007851m	ALDH2	31567.3	20223.8	51507.7	22970.5
Xelaev18007852m	ACAD10	2090.57	960.688	2937.03	2373.99
Xelaev18007854m	BRAP	553.851	273.965	788.416	599.172
Xelaev18007855m	ATXN2	462.884	336.124	334.032	718.497
Xelaev18007864m	NAA25	98.093	0	116.085	80.101
Xelaev18007865m	TRAFD1	679.631	359.734	600.931	1078.23
Xelaev18007867m	HECTD4	8.091	0	11.401	4.781
Xelaev18007868m	RPL6	59215.5	42138.3	122026	13481.7
Xelaev18007869m	PTPN11	50.833	0	50.833	0
Xelaev18007893m	RFC5	616.673	0	513.559	719.787
Xelaev18007898m	PEBP1	386.05	604.462	167.638	0
Xelaev18007900m	TAOK3	38.913	0	38.913	0
Xelaev18007917m	TCN2	611.37	1100.03	19.351	714.734
Xelaev18007921m	DUSP18	73.574	0	73.574	0
Xelaev18007924m	MZT2B	113.76	0	189.095	38.425
Xelaev18007933m	HINT1	1177.29	2929.95	52.787	549.138
Xelaev18007940m	ISOC1	2910.3	1925.84	1656.46	5148.61
Xelaev18007942m	SLC27A6	967.964	656.238	1729.05	518.602
Xelaev18007946m	SLC12A2	186.137	0	241.155	131.118
Xelaev18007948m	PRRC1	254.45	0	449.913	58.986
Xelaev18007951m	LMNB1	788.214	1486.09	450.09	428.46
Xelaev18007954m	PHAX	309.211	502.8	414.805	10.027
Xelaev18007955m	ALDH7A1	7704.65	10046.1	5011.38	8056.5
Xelaev18007956m	GRAMD2B	254.47	631.931	42.942	88.538
Xelaev18007962m	CEP120	59.096	0	73.944	44.249
Xelaev18007964m	PPIC	4222.13	1969.46	5282.02	5414.9
Xelaev18007966m	SNX2	97.114	152.222	0	42.006
Xelaev18007971m	SRFBP1	884.142	1602.23	459.71	590.484
Xelaev18007973m	HSD17B4	7829.03	5863.18	9568.13	8055.78
Xelaev18007977m	DMXL1	19.208	0	18.064	20.351
Xelaev18007979m	DTWD2	444.252	0	444.252	0
Xelaev18007981m	COMMD10	1424.99	1295.21	1652.94	1326.83
Xelaev18007985m	AP3S1	859.429	0	676.895	1041.96
Xelaev18007986m	CDO1	67.317	91.619	43.016	0
Xelaev18007989m	TMED7	3770.63	0	3471.32	4069.95
Xelaev18007999m	YTHDC2	332.944	103.66	493.04	402.132
Xelaev18008003m	DCP2	51.037	0	81.437	20.637
Xelaev18008004m	REEP5	9391.9	21724	1254.36	5197.39
Xelaev18008005m	SRP19	1012.18	1959.32	0	65.043
Xelaev18008006m	APC	8.714	0	5.509	11.92
Xelaev18008012m	WDR36	170.067	43.052	390.977	76.172
Xelaev18008014m	SLC25A46	289.061	0	202.062	376.061
Xelaev18008023m	FBXL17	84.711	82.99	113.43	57.711
Xelaev18008032m	NUDT12	157.928	213.509	109.061	151.214
Xelaev18008035m	PPIP5K2	203.801	64.457	380.917	166.029
Xelaev18008037m	PAM	14.938	0	5.937	23.939
Xelaev18008048m	Xelaev18008048m	182.056	0	248.391	115.72
Xelaev18008052m	LNPEP	1936.1	1146.49	1985.61	2676.21
Xelaev18008053m	ERAP1	371.632	386.793	517.278	210.826
Xelaev18008054m	CAST	1285.34	1878.4	599.655	1377.95
Xelaev18008057m	ELL2	354.056	382.922	286.387	392.858
Xelaev18008060m	GLRX	12593.4	10926.5	17571.8	9281.78
Xelaev18008065m	TTC37	2566.26	2416.14	2135.64	3146.98
Xelaev18008069m	KIAA0825	9.278	0	13.934	4.621
Xelaev18008070m	FAM172A	44.671	50.025	39.317	0
Xelaev18008083m	POLR3G	892.19	1051.12	1458.48	166.963
Xelaev18008091m	TMEM161B	33.517	0	33.517	0
Xelaev18008092m	CCNH	534.352	519.345	0	549.359
Xelaev18008093m	RASA1	107.886	0	196.47	19.301
Xelaev18008105m	XRCC4	182.806	178.573	103.85	265.997
Xelaev18008106m	TMEM167A	2523.57	0	2523.57	0
Xelaev18008111m	ACOT12	284.564	0	177.235	391.893
Xelaev18008116m	MSH3	43.754	0	0	43.754
Xelaev18008117m	DHFR	27214.7	18418.4	40398.4	22827.4
Xelaev18008119m	FAM151B	1912.95	781.229	2111.39	2846.24
Xelaev18008120m	ZFYVE16	604.689	557.575	335.303	921.19
Xelaev18008122m	RAD17	360.766	433.722	204.328	444.249
Xelaev18008123m	AK6	1362.47	1783.96	0	940.98
Xelaev18008125m	OCLN	775.378	1198.08	258.397	869.659
Xelaev18008131m	SMN1	1793.68	2479.66	2626.05	275.34
Xelaev18008132m	BDP1	7.542	0	0	7.542
Xelaev18008139m	MRPS27	4148.86	3296.11	4291.28	4859.2
Xelaev18008140m	PTCD2	14.804	0	14.804	0
Xelaev18008142m	TNPO1	13.901	0	0	13.901
Xelaev18008145m	TMEM171	320.164	0	499.172	141.156
Xelaev18008154m	UTP15	108.505	189.616	102.954	32.945
Xelaev18008160m	HEXB	1670.04	2921.61	0	418.473
Xelaev18008161m	GFM2	565.078	374.43	901.959	418.846
Xelaev18008169m	COL4A3BP	1153.05	1073.68	617.607	1767.86
Xelaev18008170m	POLK	123.645	0	80.066	167.224
Xelaev18008172m	POC5	210.502	0	266.287	154.716
Xelaev18008174m	IQGAP2	290.499	368.182	162.982	340.333
Xelaev18008184m	WDR41	68.636	0	68.636	0
Xelaev18008186m	TBCA	3024.12	1562.89	4840.65	2668.82
Xelaev18008187m	AP3B1	516.015	264.161	624.729	659.155
Xelaev18008188m	SCAMP1	330.216	485.094	186.296	319.257
Xelaev18008192m	ARSB	2233.93	280.577	5289.21	1132.01
Xelaev18008194m	DMGDH	3225.34	1595.36	3280	4800.66
Xelaev18008195m	BHMT	2286.7	3919.43	544.862	2395.82
Xelaev18008196m	JMY	40.606	0	44.886	36.326
Xelaev18008201m	TENT2	100.352	0	103.257	97.446
Xelaev18008204m	MTX3	551.687	255.659	551.83	847.572
Xelaev18008207m	CDK7	540.698	314.719	1253.14	54.234
Xelaev18008213m	CCNB1	219.722	0	219.722	0
Xelaev18008215m	PIK3R1	53.555	0	66.853	40.258
Xelaev18008218m	MAST4	11.065	0	0	11.065
Xelaev18008224m	NLN	617.08	342.585	805.115	703.54
Xelaev18008227m	TRAPPC13	212.463	319.497	81.828	236.063
Xelaev18008242m	DIMT1	454.653	187.279	757.398	419.281
Xelaev18008249m	NDUFAF2	430.349	125.056	273.103	892.888
Xelaev18008265m	SETD9	50.244	0	10.523	89.964
Xelaev18008271m	IL6ST	58.756	0	63.701	53.811
Xelaev18008273m	DDX4	4424	1764.81	6411.52	5095.67
Xelaev18008281m	MTREX	141.976	0	77.499	206.453
Xelaev18008284m	DHX29	1168.09	798.18	1465.96	1240.14
Xelaev18008289m	GPX8	886.682	886.682	0	0
Xelaev18008295m	SNX18	58.482	0	87.423	29.542
Xelaev18008300m	NDUFS4	4310.35	4222.37	7037.43	1671.25
Xelaev18008303m	MOCS2	820.758	775.934	0	865.583
Xelaev18008304m	ITGA2	18.965	18.965	0	0
Xelaev18008314m	MRPS30	983.517	792.886	1440.63	717.036
Xelaev18008317m	NNT	10018.1	10388.5	9886.2	9779.65
Xelaev18008318m	PAIP1	520.273	287.944	752.603	0
Xelaev18008321m	HMGCS1	20.806	0	20.806	0
Xelaev18008324m	SELENOP	822.986	0	23.334	1622.64
Xelaev18008331m	OXCT1	21558.4	9430.45	29301.7	25943
Xelaev18008335m	RPL37	105912	155135	0	56688
Xelaev18008336m	PRKAA1	461.425	0	400.78	522.07
Xelaev18008337m	TTC33	240.302	96.204	384.401	0
Xelaev18008344m	C9	5711.65	6976.55	2141.76	8016.65
Xelaev18008352m	WDR70	1253.88	953.707	1040.99	1766.93
Xelaev18008353m	NUP155	1703.53	883.24	2078.76	2148.6
Xelaev18008357m	NIPBL	30.736	66.374	14.867	10.968
Xelaev18008361m	NADK2	1145.26	826.785	2213.11	395.882
Xelaev18008366m	UGT3A2	5166.39	5441.77	3845.16	6212.26
Xelaev18008369m	SPEF2	2.566	0	2.566	0
Xelaev18008372m	DNAJC21	507.103	507.103	0	0
Xelaev18008373m	RAD1	317.645	0	528.26	107.03
Xelaev18008378m	AMACR	2085.45	1320.88	3103.61	1831.85
Xelaev18008384m	TARS	5785.19	6314.84	4674	6366.71
Xelaev18008389m	ZFR	25.545	0	26.766	24.325
Xelaev18008390m	MTMR12	40.533	0	62.052	19.015
Xelaev18008398m	LMAN1	2095.2	2746.26	3529.94	9.409
Xelaev18008413m	ATP8B1	1805.98	0	64.799	3547.16
Xelaev18008414m	NARS	2214.41	6258.33	190.472	194.437
Xelaev18008415m	FECH	4152.84	6254.12	3018.97	3185.42
Xelaev18008420m	TXNL1	1596.14	1666.13	799.131	2323.16
Xelaev18008427m	RAB27B	2044.48	1507.73	3529.54	1096.17
Xelaev18008440m	TSPAN3	2796.11	0	4765.47	826.752
Xelaev18008441m	BAAT	200.302	0	194.116	206.488
Xelaev18008445m	SKA1	1047.23	603.182	869.744	1668.77
Xelaev18008447m	ME2	1940.48	622.481	1718.62	3480.35
Xelaev18008449m	ELAC1	178.453	0	178.453	0
Xelaev18008452m	ACAA2	21593.6	28412.2	26406.8	9961.66
Xelaev18008456m	CTIF	29.698	0	0	29.698
Xelaev18008460m	DYM	433.924	433.924	0	0
Xelaev18008462m	DYM	255.209	255.209	0	0
Xelaev18008463m	C18ORF32	2749.05	6905.02	938.235	403.912
Xelaev18008466m	SMAD2	278.615	79.07	478.161	0
Xelaev18008469m	IER3IP1	4446.05	0	7658.49	1233.61
Xelaev18008470m	HDHD2	4631.38	203.423	6830.16	6860.55
Xelaev18008475m	EEF2	72.114	172.896	12.096	31.35
Xelaev18008486m	FDX2	86.162	0	0	86.162
Xelaev18008488m	HAUS1	1627.08	1692.18	1420.49	1768.56
Xelaev18008489m	ATP5F1A	30591.4	20961	69618.1	1195.16
Xelaev18008492m	EPG5	65.265	0	90.634	39.897
Xelaev18008501m	PIK3C3	178.292	145.284	368.802	20.79
Xelaev18008515m	TPGS2	53.395	0	96.578	10.212
Xelaev18008520m	UBAP1	316.652	427.84	276.037	246.077
Xelaev18008522m	KIF27	46.943	12.17	48.586	80.074
Xelaev18008523m	PIGO	490.382	225.745	640.257	605.145
Xelaev18008524m	VWA5A	16775.1	14946.1	17819.2	17560.1
Xelaev18008548m	VCP	10450.3	4747.63	12575.9	14027.3
Xelaev18008549m	2019-03-01	681.314	1379.13	221.813	442.994
Xelaev18008550m	STOML2	8704.14	12485.1	11928.3	1699.03
Xelaev18008555m	UNC13B	36.144	15.308	44.68	48.443
Xelaev18008564m	ATP8B2	84.766	149.082	20.451	0
Xelaev18008617m	SIGMAR1	2367.9	1789.15	0	2946.66
Xelaev18008620m	DCTN3	5039.69	3783.26	5595.52	5740.3
Xelaev18008622m	DNAI1	70.85	41.526	114.003	57.022
Xelaev18008634m	TLN1	552.23	387.459	699.442	569.79
Xelaev18008636m	TPM2	800.704	213.074	1291.5	897.535
Xelaev18008642m	MYO3B	287.579	115.146	374.216	373.374
Xelaev18008645m	SMPD3	69.285	0	103.892	34.677
Xelaev18008652m	HTRA2	1361.94	618.52	1542.85	1924.47
Xelaev18008653m	AUP1	1124.92	1231.75	1473.79	669.223
Xelaev18008662m	PDCD4	7379.2	2623.84	16648.4	2865.42
Xelaev18008676m	IDH3B	9482.99	7441.6	11189.9	9817.48
Xelaev18008741m	ALMS1	551.819	0	0	551.819
Xelaev18008749m	CCT7	2801.88	1670.42	2126.77	4608.45
Xelaev18008754m	DCTN1	159.348	186.668	147.359	144.017
Xelaev18008760m	NAT8B	701.576	1282.6	795.021	27.105
Xelaev18008771m	ZNF638	283.225	551.166	95.033	203.474
Xelaev18008773m	EXOC6B	129.011	53.466	89.398	244.168
Xelaev18008780m	PAIP2B	1594.64	4115.09	627.242	41.583
Xelaev18008785m	SLC4A11	446.012	0	0	446.012
Xelaev18008792m	ATRN	322.464	408.381	288.211	270.801
Xelaev18008801m	UBOX5	56.842	0	84.695	28.99
Xelaev18008815m	SMOX	440.203	531.726	0	348.681
Xelaev18008826m	SUCLG1	9683.76	14215.9	4004.68	10830.7
Xelaev18008842m	KDM3A	433.547	577.965	271.925	450.75
Xelaev18008845m	IMMT	2226.22	3979.25	1675.86	1023.55
Xelaev18008857m	MAEA	419.949	512.057	720.161	27.629
Xelaev18008861m	SLBP	116.782	155.569	0	77.995
Xelaev18008863m	TACC3	2352.74	2114.75	1813.55	3129.93
Xelaev18008868m	LETM1	122.717	202.79	104.506	60.855
Xelaev18008873m	NELFA	359.927	0	505.16	214.694
Xelaev18008882m	FAM193A	15.443	0	17.697	13.19
Xelaev18008883m	TNIP2	33.541	0	12.857	54.225
Xelaev18008885m	ADD1	229.045	229.045	0	0
Xelaev18008917m	WFS1	247.438	145.024	255.125	342.165
Xelaev18008925m	STX18	232.281	454.334	175.172	67.337
Xelaev18008929m	LYAR	2728.73	2728.73	0	0
Xelaev18008935m	WDR1	14577.5	9303.83	17028	17400.7
Xelaev18008952m	QDPR	5876.36	197.66	9155.85	8275.57
Xelaev18008967m	DHX15	719.244	436.024	386.932	1334.77
Xelaev18008971m	PI4K2B	216.817	40.689	392.944	0
Xelaev18008972m	ZCCHC4	143.897	0	184.151	103.642
Xelaev18008996m	RPL9	2900.72	7723.71	670.77	307.679
Xelaev18008997m	LIAS	981.327	1290.17	892.474	761.336
Xelaev18008998m	UGDH	313.581	0	0	313.581
Xelaev18009003m	PDS5A	81.54	129.451	108.626	6.544
Xelaev18009011m	UCHL1	16377.6	8575.61	28674	11883.2
Xelaev18009018m	TMEM33	1267.72	0	2392.96	142.482
Xelaev18009019m	SLC30A9	331.136	313.019	379.836	300.553
Xelaev18009022m	ATP8A1	33.466	0	40.819	26.113
Xelaev18009030m	COMMD8	691.255	1112.18	270.325	0
Xelaev18009039m	ZAR1	771.56	0	45.257	1497.86
Xelaev18009040m	FRYL	25.401	0	25.401	0
Xelaev18009057m	FIP1L1	1422.68	1461	1732.88	1074.16
Xelaev18009070m	TMEM165	319.524	376.539	262.509	0
Xelaev18009078m	EXOC1	163.937	215.034	87.878	188.901
Xelaev18009081m	PAICS	7319.9	10947.1	9543.85	1468.79
Xelaev18009082m	PPAT	41.111	0	0	41.111
Xelaev18009099m	VPS37A	409.76	0	365.029	454.49
Xelaev18009104m	MTUS1	43.552	0	53.247	33.857
Xelaev18009106m	FAT1	22.317	14.533	29.801	22.617
Xelaev18009125m	ACSL1	2414.5	1101.51	2725.79	3416.21
Xelaev18009133m	TRAPPC11	277.119	155.742	335.967	339.649
Xelaev18009134m	RWDD4	317.094	440.516	0	193.672
Xelaev18009141m	WWC2	70.323	0	70.2	70.446
Xelaev18009148m	SPCS3	2504.65	5057.21	272.203	2184.54
Xelaev18009158m	HMGB2	24118.9	46390.2	18658.9	7307.66
Xelaev18009160m	GALNT7	87.802	153.564	43.628	66.213
Xelaev18009163m	AADAT	696.547	827.157	1206.83	55.655
Xelaev18009168m	NEK1	372.713	126.339	243.936	747.865
Xelaev18009169m	SH3RF1	63.679	0	59.72	67.638
Xelaev18009174m	TRIM63	71.586	0	100.674	42.499
Xelaev18009192m	PPID	5498.39	4039.59	2823.52	9632.06
Xelaev18009212m	PLRG1	976.851	944.722	1095.26	890.574
Xelaev18009222m	ARFIP1	322.434	530.953	113.915	0
Xelaev18009224m	ERCC8	65.02	0	27.899	102.14
Xelaev18009232m	RPS3A	21801.6	26482.9	34214.8	4707.19
Xelaev18009233m	LRBA	317.709	250.532	320.965	381.629
Xelaev18009241m	ARHGAP10	92.059	99.363	84.756	0
Xelaev18009255m	SMAD1	608.142	0	1111.06	105.221
Xelaev18009261m	ABCE1	1059.77	930.909	288.254	1960.14
Xelaev18009262m	OTUD4	934.412	813.336	985.253	1004.65
Xelaev18009263m	SMARCA5	751.109	913.959	622.983	716.386
Xelaev18009264m	GAB1	142.501	0	142.501	0
Xelaev18009266m	USP38	198.917	0	0	198.917
Xelaev18009270m	INPP4B	128.429	0	0	128.429
Xelaev18009272m	ZNF330	382.224	622.768	0	141.679
Xelaev18009279m	CANX	30.586	0	0	30.586
Xelaev18009287m	RAB33B	331.231	299.356	485.914	208.423
Xelaev18009289m	NAA15	2351.74	2361.4	1653.53	3040.3
Xelaev18009290m	NDUFC1	2802.76	5571.69	33.816	0
Xelaev18009295m	MGARP	6375.54	0	22.281	12728.8
Xelaev18009308m	PGRMC2	718.669	0	1366.4	70.94
Xelaev18009309m	LARP1B	73.363	98.564	5.44	116.085
Xelaev18009313m	INTU	22.787	0	0	22.787
Xelaev18009327m	ANXA5	4960.28	6416.7	1733.85	6730.29
Xelaev18009330m	OSTC	238.258	0	238.258	0
Xelaev18009334m	SEC24B	196.215	0	271.695	120.734
Xelaev18009338m	PYURF	242.898	242.898	0	0
Xelaev18009347m	GAR1	967.993	0	967.993	0
Xelaev18009353m	AP1AR	205.596	0	85.729	325.462
Xelaev18009359m	ANK2	7.494	0	0	7.494
Xelaev18009370m	SEC24D	79.276	0	88.304	70.247
Xelaev18009377m	C4ORF3	347.825	335.049	0	360.601
Xelaev18009395m	AIMP1	7982.14	11316.1	5819.1	6811.25
Xelaev18009398m	INTS12	1046.64	0	1860.39	232.889
Xelaev18009401m	PPA2	4887.33	4561.96	6935.08	3164.94
Xelaev18009408m	CENPE	67.974	0	62.678	73.27
Xelaev18009414m	NFKB1	45.723	0	80.414	11.032
Xelaev18009418m	PPP3CA	1528.35	1114.53	796.84	2673.67
Xelaev18009425m	MTTP	616.546	630.542	355.299	863.796
Xelaev18009440m	METAP1	803.371	470.658	455.683	1483.77
Xelaev18009441m	EIF4E	6408.97	8882.27	4345.77	5998.87
Xelaev18009452m	PDLIM5	346.002	368.46	412.856	256.69
Xelaev18009454m	HPGDS	92509.4	68864.8	188398	20266
Xelaev18009456m	SMARCAD1	107.355	157.132	20.329	144.603
Xelaev18009486m	G3BP2	868.296	0	34.64	1701.95
Xelaev18009488m	USO1	330.453	185.344	567.68	238.333
Xelaev18009507m	ALB	14240.9	17955.2	19331.9	5435.54
Xelaev18009518m	SDAD1	141.665	0	0	141.665
Xelaev18009519m	NUP54	879.945	224.368	1489.76	925.707
Xelaev18009521m	SCARB2	130.187	159.677	180.23	50.655
Xelaev18009527m	2019-09-11	1447.41	3124.94	158.872	1058.41
Xelaev18009536m	MRPL1	3172.14	3515.5	3462.19	2538.72
Xelaev18009539m	ANXA3	3748.88	9895.04	1156.96	194.643
Xelaev18009540m	PTPN9	219.152	202.636	400.401	54.419
Xelaev18009547m	PRC1	470.765	0	372.491	569.038
Xelaev18009556m	SARAF	130.303	0	236.962	23.645
Xelaev18009580m	UHRF1	1279.16	706.129	1519.49	1611.87
Xelaev18009615m	TIMM44	1676.9	2045.79	1344.13	1640.79
Xelaev18009628m	SPPL2B	46.781	0	46.781	0
Xelaev18009631m	LMNB2	633.951	0	1217.84	50.063
Xelaev18009638m	PIAS4	66.997	0	112.947	21.048
Xelaev18009640m	EEF2	15158.6	18672.8	11574.4	15228.4
Xelaev18009645m	MRPL54	7379.28	832.812	9036.66	12268.4
Xelaev18009647m	TJP3	105.022	199.121	61.594	54.352
Xelaev18009657m	HMG20B	112.021	0	176.758	47.284
Xelaev18009660m	PLIN3	6545.38	2150.42	6432.4	11053.3
Xelaev18009662m	HDGFL2	336.927	560.902	298.308	151.573
Xelaev18009663m	UBXN6	603.83	714.192	710.891	386.407
Xelaev18009664m	CHAF1A	476.91	821.285	316.119	293.328
Xelaev18009665m	SH3GL1	676.389	825.545	581	622.622
Xelaev18009673m	DNAJA1	523.642	829.046	306.061	435.819
Xelaev18009675m	ELP1	927.491	571.02	989.596	1221.86
Xelaev18009694m	FNTA	4248.02	2198.54	7990.33	2555.18
Xelaev18009696m	SH2D4A	70.593	0	18.539	122.647
Xelaev18009715m	PPP1R3B	8.355	0	4.234	12.475
Xelaev18009729m	MBD3	166.41	321.185	0	11.634
Xelaev18009734m	AP1M1	908.17	908.17	0	0
Xelaev18009742m	PIGG	51.885	54.171	45.226	56.26
Xelaev18009743m	ATP5ME	27894.2	23766.7	27751.3	32164.5
Xelaev18009744m	GAK	442.115	425.57	494.973	405.802
Xelaev18009750m	SGTA	2852.64	4353.82	408.191	3795.9
Xelaev18009751m	THOP1	10453.8	10529.8	7716.47	13115
Xelaev18009761m	DAZAP1	945.344	1233.83	0	656.855
Xelaev18009762m	GAMT	21458.5	27237.9	9416.34	27721.2
Xelaev18009764m	NDUFS7	5079.31	5765.98	1152.54	8319.41
Xelaev18009768m	CIRBP	51609.4	46055.7	107765	1007.42
Xelaev18009771m	ATP5F1D	12110.8	28634.7	7419.6	278.196
Xelaev18009780m	GPX4	1081.92	1095.89	1067.96	0
Xelaev18009785m	TMEM259	95.187	0	161.245	29.129
Xelaev18009787m	WDR18	301.987	115.373	571.869	218.718
Xelaev18009796m	PTBP1	929.32	927.314	1147.86	712.789
Xelaev18009818m	IGLL5	254.081	0	134.523	373.64
Xelaev18009819m	NDUFA7	2166.75	1020.67	2096.58	3383
Xelaev18009826m	LARP6	15.049	0	0	15.049
Xelaev18009829m	MED11	33.532	0	50.406	16.658
Xelaev18009831m	Xelaev18009831m	322.431	0	322.431	0
Xelaev18009834m	RANBP3	925.598	863.178	621.815	1291.8
Xelaev18009849m	Xelaev18009849m	9338.54	12309.9	176.023	15529.7
Xelaev18009855m	SF3A2	680.375	0	680.375	0
Xelaev18009859m	AP3D1	521.25	756.548	369.716	437.487
Xelaev18009860m	MOB3A	480.811	0	480.811	0
Xelaev18009882m	IFI30	732.409	732.409	0	0
Xelaev18009894m	TPM1	1232.24	1680.12	784.353	0
Xelaev18009896m	RAB8A	3621.34	4501.63	1349.42	5012.97
Xelaev18009899m	ELAVL1	1624.89	3854.35	990.217	30.104
Xelaev18009902m	SAFB2	794.737	1372.38	0	217.094
Xelaev18009948m	ISYNA1	425.915	887.96	373.874	15.91
Xelaev18009950m	ELL	49.359	0	21.675	77.043
Xelaev18009975m	SLC35E1	61.145	0	0	61.145
Xelaev18009982m	NDUFB6	4572.35	170.577	9827.57	3718.9
Xelaev18009990m	TXN	21759.7	29474.7	5889.46	29915.1
Xelaev18010008m	HAUS6	286.74	0	0	286.74
Xelaev18010009m	DENND4C	18.234	0	29.154	7.315
Xelaev18010011m	PLIN2	39879.1	48874.5	67336.9	3425.86
Xelaev18010012m	RPS6	6915.89	15323.3	3337.89	2086.46
Xelaev18010021m	NIPSNAP3A	1225.01	156.726	571.424	2946.87
Xelaev18010027m	TMEM38B	15.907	0	1.725	30.088
Xelaev18010029m	RAD23B	4354.96	6185.74	602.683	6276.46
Xelaev18010034m	ELAVL2	154.637	102.58	246.117	115.213
Xelaev18010036m	PLAA	1485.61	1005.72	1246.93	2204.18
Xelaev18010037m	IFT74	755.781	784.472	572.601	910.269
Xelaev18010052m	SNAPC3	100.378	0	0	100.378
Xelaev18010071m	GLDC	1617.3	1406.97	2265.41	1179.53
Xelaev18010078m	RIC1	121.355	0	163.091	79.62
Xelaev18010093m	TJP2	627.147	0	0	627.147
Xelaev18010094m	TJP2	92.354	40.354	144.353	0
Xelaev18010101m	SMC5	97.979	72.174	172.604	49.158
Xelaev18010106m	TMEM2	53.652	0	58.707	48.596
Xelaev18010108m	ABHD17B	402.529	0	402.529	0
Xelaev18010116m	ANXA1	7063.88	18055.8	417.011	2718.78
Xelaev18010117m	ANXA1	8299.72	19297	5364.47	237.667
Xelaev18010122m	CARNMT1	103.064	0	74.908	131.22
Xelaev18010125m	OSTF1	203.327	203.327	0	0
Xelaev18010137m	PSAT1	2880.82	1441.97	4458.28	2742.21
Xelaev18010147m	MRPS18C	1069.51	650.091	1488.93	0
Xelaev18010148m	GKAP1	379.329	978.318	119.657	40.013
Xelaev18010149m	UBQLN1	53.297	53.297	0	0
Xelaev18010151m	HNRNPK	1314.35	1423.6	1976.11	543.342
Xelaev18010156m	NAA35	378.553	236.699	329.916	569.043
Xelaev18010157m	GOLM1	246.294	577.709	16.687	144.487
Xelaev18010165m	CTSV	1021.58	1635.64	0	407.522
Xelaev18010167m	FBP1	1585.54	2943.5	292.995	1520.12
Xelaev18010173m	ABRAXAS1	49.41	0	0	49.41
Xelaev18010175m	HABP4	20623.8	38957.6	15392.9	7520.9
Xelaev18010200m	AUH	357.568	478.855	99.686	494.162
Xelaev18010210m	TM9SF1	149.985	187.28	163.551	99.123
Xelaev18010214m	RNF31	257.959	0	322.952	192.966
Xelaev18010215m	PSME2	359.805	0	0	359.805
Xelaev18010216m	PSME1	11390.3	14958.4	17090.3	2122.14
Xelaev18010218m	PCK2	7115.85	7747.27	12055.7	1544.59
Xelaev18010226m	PABPN1	233.814	213.644	0	253.984
Xelaev18010231m	THTPA	249.117	0	0	249.117
Xelaev18010239m	MRPL52	41.423	0	0	41.423
Xelaev18010244m	PRMT5	2948.37	1716.36	4245.66	2883.11
Xelaev18010246m	OXA1L	134.287	0	134.287	0
Xelaev18010254m	PSMB5	9183.48	0	16548.4	1818.54
Xelaev18010279m	RAB2B	780.609	864.731	215.003	1262.09
Xelaev18010281m	CHD8	120.628	0	124.513	116.743
Xelaev18010282m	SUPT16H	1850.9	2375.17	2266.2	911.327
Xelaev18010298m	SDR39U1	14172.4	5087.33	18999.2	18430.7
Xelaev18010299m	PNP	126.207	169.419	82.969	126.231
Xelaev18010304m	TTC5	340.251	177.06	581.737	261.956
Xelaev18010308m	LPCAT4	62.202	0	96.061	28.344
Xelaev18010309m	NOP10	998.401	2102.69	363.175	529.334
Xelaev18010314m	APEX1	122.723	166.658	0	78.788
Xelaev18010324m	PARP2	81.486	0	0	81.486
Xelaev18010325m	HNRNPC	780.485	820.658	0	740.311
Xelaev18010326m	NDRG2	2899.81	1284.44	5849.61	1565.39
Xelaev18010334m	MORC2	124.501	0	124.501	0
Xelaev18010336m	SMTN	30.32	0	32.096	28.545
Xelaev18010344m	PES1	205.433	24.845	386.021	0
Xelaev18010347m	SF3A1	98.448	0	98.448	0
Xelaev18010348m	TBC1D10A	188.037	0	237.882	138.191
Xelaev18010355m	MTMR3	84.878	135.634	57.87	61.129
Xelaev18010356m	ASCC2	256.365	0	227.463	285.268
Xelaev18010363m	THOC5	103.449	53.13	11.487	245.73
Xelaev18010365m	AP1B1	531.05	0	319.421	742.68
Xelaev18010383m	SDSL	351.21	0	258.199	444.221
Xelaev18010388m	ISCU	1690.73	3464.23	177.379	1430.58
Xelaev18010392m	CORO1C	3248.01	2268.93	5010.18	2464.93
Xelaev18010403m	GLTP	1050.34	1750.27	59.334	1341.42
Xelaev18010405m	GIT2	116.87	0	48.836	184.905
Xelaev18010406m	ANKRD13A	64.894	29.74	154.262	10.679
Xelaev18010410m	KIAA1671	44.328	0	0	44.328
Xelaev18010436m	PITPNB	1219.32	1108.92	1329.71	0
Xelaev18010440m	DGCR6	1220.91	682.548	487.006	2493.16
Xelaev18010445m	PRKAB1	1164.53	0	725.542	1603.51
Xelaev18010449m	GCN1	2034.4	3635.61	1035.22	1432.36
Xelaev18010452m	PXN	541.216	468.35	0	614.081
Xelaev18010459m	COX6A1	5959.78	8396.24	477.625	9005.47
Xelaev18010464m	DYNLL2	2209.77	2209.77	0	0
Xelaev18010465m	RNF10	114.508	0	64.238	164.777
Xelaev18010467m	MLEC	1182.02	1760.98	603.064	0
Xelaev18010468m	UNC119B	389.255	0	528.664	249.845
Xelaev18010480m	EIF4ENIF1	2157.32	1754.39	1658.55	3059.02
Xelaev18010484m	DEPDC5	39.334	0	39.334	0
Xelaev18010493m	UPB1	3409.01	1879.2	5540.49	2807.32
Xelaev18010496m	SNRPD3	3525.78	3525.78	0	0
Xelaev18010504m	MED15	131.622	116.608	194.648	83.61
Xelaev18010505m	KLHL22	18.033	0	0	18.033
Xelaev18010521m	CLTC	174.646	0	127.635	221.658
Xelaev18010523m	PI4KAP2	14.533	0	14.533	0
Xelaev18010529m	SDF2L1	877.442	1752.17	652.93	227.229
Xelaev18010536m	PPIL2	880.107	645.195	1405.38	589.744
Xelaev18010537m	HIRA	26.375	0	10.972	41.779
Xelaev18010538m	MRPL40	4274.19	4274.19	0	0
Xelaev18010539m	UFD1	1702.25	1301.81	1609.73	2195.2
Xelaev18010543m	2019-09-02	344.279	575.061	0	113.498
Xelaev18010549m	TXNRD2	2560.09	3414.5	3343.06	922.718
Xelaev18010551m	COMT	188.563	0	346.95	30.177
Xelaev18010554m	TRMT2A	1008.37	1100.2	368.298	1556.6
Xelaev18010555m	RANBP1	17033.5	11344.5	0	22722.4
Xelaev18010558m	PGAM5	4617.27	3201.23	5342.91	5307.68
Xelaev18010560m	GOLGA3	65.677	56.196	74.294	66.54
Xelaev18010568m	RNF113A	2197.05	4532.41	315.362	1743.37
Xelaev18010570m	PUS1	1972.06	1717.8	2301.78	1896.59
Xelaev18010590m	BRI3BP	1956.96	0	841.727	3072.19
Xelaev18010595m	SCARB1	234.926	229.746	240.106	0
Xelaev18010598m	NCOR2	4.873	0	4.873	0
Xelaev18010604m	EIF2B1	120.757	120.757	0	0
Xelaev18010605m	DDX55	218.489	180.685	202.113	272.669
Xelaev18010609m	KMT5A	190.618	405.726	123.761	42.366
Xelaev18010610m	SBNO1	142.678	163.273	216.411	48.349
Xelaev18010611m	CDK2AP1	2147.86	0	2401.31	1894.4
Xelaev18010616m	VPS37B	499.163	0	499.163	0
Xelaev18010617m	HIP1R	1363.11	1442.49	998.235	1648.6
Xelaev18010618m	DENR	14309.6	15657	14602.5	12669.3
Xelaev18010623m	CLIP1	1067.27	1584.81	840.956	776.053
Xelaev18010626m	VPS33A	520.514	0	531.089	509.939
Xelaev18010628m	DIABLO	1993.38	1232.74	3670.61	1076.78
Xelaev18010630m	MLXIP	84.226	86.012	147.001	19.664
Xelaev18010633m	PSMD9	2215.96	1365.45	3221.99	2060.45
Xelaev18010641m	TMEM120B	82.506	152.86	38.559	56.099
Xelaev18010648m	IFT81	82.556	0	5.077	160.035
Xelaev18010651m	ATP2A2	2046.02	2600.03	1570.82	1967.2
Xelaev18010652m	ANAPC7	226.31	179.442	273.177	0
Xelaev18010661m	ATXN2	818.857	1017.98	821.66	616.932
Xelaev18010670m	ERP29	306.375	309.567	158.177	451.382
Xelaev18010671m	NAA25	212.541	0	76.579	348.502
Xelaev18010672m	TRAFD1	132.691	0	201.167	64.215
Xelaev18010673m	HECTD4	9.734	0	9.734	0
Xelaev18010675m	RPL6	31180.5	25940.8	5258.91	62341.9
Xelaev18010676m	PTPN11	548.936	299.613	798.259	0
Xelaev18010689m	TESC	124.102	0	153.57	94.635
Xelaev18010694m	RFC5	2283.4	1318.31	3019.4	2512.49
Xelaev18010713m	TCN2	948.933	753.535	457.317	1635.95
Xelaev18010724m	HINT1	51757.4	31584.2	32478.8	91209.2
Xelaev18010728m	SLC12A2	388.906	1145.5	13.159	8.061
Xelaev18010730m	PRRC1	1138.09	0	1976.35	299.838
Xelaev18010734m	LMNB1	594.276	1248.88	221.354	312.591
Xelaev18010737m	PHAX	912.12	466.542	1001.05	1268.77
Xelaev18010738m	ALDH7A1	4938.08	6164.69	4225.86	4423.69
Xelaev18010739m	GRAMD2B	23.46	0	34.839	12.082
Xelaev18010744m	PPIC	224.717	0	0	224.717
Xelaev18010746m	SNX2	392.385	569.118	57.665	550.37
Xelaev18010763m	CDO1	49.996	0	68.483	31.508
Xelaev18010764m	TMED7	411.403	0	196.755	626.052
Xelaev18010769m	TRIM36	56.179	0	0	56.179
Xelaev18010772m	DCP2	353.289	0	547.187	159.39
Xelaev18010773m	REEP5	11806	22454.8	0	1157.22
Xelaev18010775m	APC	17.232	0	23.782	10.682
Xelaev18010780m	WDR36	192.586	0	192.586	0
Xelaev18010781m	SLC25A46	344.915	225.788	566.869	242.087
Xelaev18010783m	MAN2A1	133.054	0	167.67	98.437
Xelaev18010794m	PAM	147.731	109.384	136	197.807
Xelaev18010800m	CHD1	79.411	0	0	79.411
Xelaev18010803m	RIOK2	153.532	57.232	258.27	145.095
Xelaev18010809m	CAST	1573.51	3781.38	59.572	879.57
Xelaev18010811m	ELL2	294.068	212.054	191.54	478.609
Xelaev18010836m	RASA1	475.719	438.42	444.475	544.262
Xelaev18010842m	Xelaev18010842m	860.591	0	841.116	880.065
Xelaev18010853m	Xelaev18010853m	286.439	0	0	286.439
Xelaev18010860m	AK6	187.901	0	0	187.901
Xelaev18010862m	OCLN	511.024	658.502	0	363.545
Xelaev18010863m	GTF2H2	425.038	0	424.267	425.808
Xelaev18010864m	SMN1	708.656	1002.38	414.936	0
Xelaev18010867m	MCCC2	3558.31	4346.28	5499.53	829.117
Xelaev18010871m	TNPO1	240.572	0	369.318	111.826
Xelaev18010878m	UTP15	67.477	62.884	72.071	0
Xelaev18010883m	HEXB	5641.99	3988.61	2271.07	10666.3
Xelaev18010891m	COL4A3BP	519.55	742.538	0	296.562
Xelaev18010897m	IQGAP2	117.213	0	108.123	126.303
Xelaev18010908m	AGGF1	68.974	101.353	36.595	0
Xelaev18010912m	TBCA	9810.68	13929	2178	13325
Xelaev18010913m	AP3B1	184.707	26.751	389.662	137.709
Xelaev18010928m	CCNB1	223.971	0	278.184	169.758
Xelaev18010930m	SLC30A5	26.992	0	11.073	42.911
Xelaev18010934m	PIK3R1	90.752	0	0	90.752
Xelaev18010937m	MAST4	34.641	0	47.267	22.014
Xelaev18010944m	PPWD1	167.235	108.654	162.183	230.867
Xelaev18010951m	MTREX	679.952	1153.77	347.817	538.267
Xelaev18010981m	MRPS30	1859.13	1303.54	3328.48	945.368
Xelaev18010984m	NNT	2636.12	2970.04	2405.09	2533.22
Xelaev18010985m	PAIP1	614.4	661.463	185.94	995.798
Xelaev18011014m	NIPBL	20.967	0	35.714	6.22
Xelaev18011017m	NADK2	107.424	62.592	33.231	226.45
Xelaev18011028m	BRIX1	295.012	535.524	165.151	184.361
Xelaev18011038m	ZFR	343.921	257.738	362.894	411.131
Xelaev18011042m	PDZD2	9.397	0	0	9.397
Xelaev18011047m	LMAN1	1345.49	1203.51	1680.07	1152.89
Xelaev18011057m	ALPK2	17.916	0	17.916	0
Xelaev18011058m	NEDD4L	53.173	0	54.264	52.081
Xelaev18011060m	ATP8B1	99.712	0	0	99.712
Xelaev18011061m	NARS	1169.18	409.853	1042.36	2055.34
Xelaev18011062m	FECH	51.028	0	65.135	36.921
Xelaev18011068m	WDR7	20.987	0	19.56	22.414
Xelaev18011070m	TXNL1	14438.5	9810.84	10709.1	22795.8
Xelaev18011074m	RAB27B	1305.14	1180.31	2305.42	429.688
Xelaev18011080m	MBD2	98.644	0	98.644	0
Xelaev18011095m	ME2	11299.3	1814.86	16222.8	15860.3
Xelaev18011100m	ACAA2	6300.1	7707.41	10401.9	790.962
Xelaev18011108m	C18ORF32	259.424	655.201	96.674	26.398
Xelaev18011117m	IER3IP1	384.451	252.353	653.828	247.173
Xelaev18011126m	C18ORF25	139.831	0	112.528	167.135
Xelaev18011128m	ATP5F1A	6137.97	16982.4	1049.91	381.636
Xelaev18011159m	UBAP2	666.547	746.619	803.327	449.694
Xelaev18011161m	UBAP1	169.166	245.888	169.298	92.312
Xelaev18011171m	VWA5A	2161.62	1736.82	1750.4	2997.64
Xelaev18011173m	VCP	13209.3	16691.1	19851.9	3084.91
Xelaev18011175m	FANCG	77.188	0	72.949	81.427
Xelaev18011176m	2019-03-01	93.46	0	29.636	157.285
Xelaev18011177m	STOML2	15880.9	15880.9	0	0
Xelaev18011184m	RECQL4	350.774	241.085	483.44	327.797
Xelaev18011189m	NDUFV3	3999.87	3415.56	4548.87	4035.18
Xelaev18011191m	CBS	834.064	1529.64	0	138.486
Xelaev18011206m	ATP1A1	493.328	327.376	361.429	791.179
Xelaev18011209m	POGLUT1	316.728	0	161.697	471.759
Xelaev18011210m	TIMMDC1	329.27	0	446.744	211.796
Xelaev18011216m	GATD3A	3282.17	3862.18	2789.07	3195.27
Xelaev18011222m	PDXK	513.691	378.524	453.152	709.398
Xelaev18011223m	AGPAT3	2117.24	0	2636.22	1598.25
Xelaev18011224m	TRAPPC10	35.328	0	35.328	0
Xelaev18011248m	HSD3B1	186.279	0	37.038	335.521
Xelaev18011255m	CSTB	26657.9	49687.7	23660	6625.94
Xelaev18011266m	MAN1A2	80.592	0	107.189	53.995
Xelaev18011268m	NDUFB4	10860.2	6989.85	14661.8	10929
Xelaev18011281m	ATP6V1A	3928.82	3336.17	3514.45	4935.84
Xelaev18011284m	FAM162A	475.73	403.243	548.218	0
Xelaev18011287m	NDC80	207.972	0	173.931	242.012
Xelaev18011298m	SPICE1	42.276	79.938	4.614	0
Xelaev18011301m	QTRT2	273.25	30.037	399.516	390.197
Xelaev18011316m	UPK1B	182.614	356.733	56.751	134.357
Xelaev18011324m	CREG1	513.629	878.412	96.941	565.534
Xelaev18011330m	GPA33	1469.03	1860.09	2196.14	350.873
Xelaev18011331m	MAEL	195.962	313.479	208.469	65.938
Xelaev18011359m	GPR89A	113.659	0	113.659	0
Xelaev18011360m	GTPBP8	518.404	302.509	1241.85	10.854
Xelaev18011365m	BCL9	80.785	92.241	132.951	17.163
Xelaev18011391m	ZBTB21	50.351	69.968	0	30.734
Xelaev18011419m	FAM3B	250.54	351.802	385.854	13.965
Xelaev18011420m	BACE2	212.244	0	269.425	155.063
Xelaev18011432m	WRB	508.437	0	508.437	0
Xelaev18011433m	HMGN1	4989.99	9138.86	841.111	0
Xelaev18011435m	PSMG1	1199.66	522.321	1440.31	1636.36
Xelaev18011445m	DSCR3	408.901	240.986	276.687	709.031
Xelaev18011446m	TTC3	24.968	34.843	24.081	15.98
Xelaev18011447m	PIGP	178.816	292.672	64.961	0
Xelaev18011449m	HLCS	579.772	294.69	618.65	825.975
Xelaev18011452m	CHAF1B	1680.84	1059.33	1921.38	2061.82
Xelaev18011453m	MORC3	41.63	0	26.828	56.432
Xelaev18011456m	MORC3	18.133	0	18.133	0
Xelaev18011457m	DOPEY2	100.103	145.627	120.619	34.064
Xelaev18011458m	CBR1	14530.3	17339.5	9452.29	16799.1
Xelaev18011461m	CBR1	6608.14	12682.6	4527.99	2613.82
Xelaev18011465m	CLIC6	160.524	0	160.524	0
Xelaev18011474m	ATP5PO	49883.7	24973.6	93626.1	31051.4
Xelaev18011477m	CRYZL1	5978.61	2953.25	9527.04	5455.54
Xelaev18011478m	DONSON	236.481	244.352	208.833	256.258
Xelaev18011480m	SON	237.448	277.942	202.992	231.409
Xelaev18011481m	PATL2	1208.11	0	1017.05	1399.16
Xelaev18011482m	GART	15799.4	13169.2	13767.1	20461.8
Xelaev18011498m	PAXBP1	48.819	0	48.819	0
Xelaev18011499m	SYNJ1	54.449	0	72.073	36.825
Xelaev18011500m	CFAP298	149.893	289.996	9.791	0
Xelaev18011503m	URB1	169.233	92.201	233.486	182.012
Xelaev18011510m	SOD1	23361.7	51606.1	16748.8	1730.22
Xelaev18011513m	TIAM1	46.518	42.454	0	50.582
Xelaev18011525m	CCT8	31227.8	38921.8	43754.4	11007.2
Xelaev18011526m	USP16	280.032	87.187	83.011	669.897
Xelaev18011528m	TMEM97	1452.48	0	1452.48	0
Xelaev18011529m	LTN1	449.043	171.75	725.173	450.204
Xelaev18011534m	GABPA	80.337	0	0	80.337
Xelaev18011535m	ATP5J	21213.1	12332.4	51198.5	108.253
Xelaev18011539m	MRPL39	4756.72	4329.48	4600.74	5339.94
Xelaev18011545m	CPOX	600.975	760.723	475.937	566.266
Xelaev18011548m	RIOX2	275.901	210.347	414.057	203.299
Xelaev18011552m	ARL6	235.601	381.787	73	252.016
Xelaev18011566m	CHMP2B	2804.66	5166.9	653.433	2593.65
Xelaev18011569m	GBE1	5901.45	3184.24	7077.25	7442.85
Xelaev18011589m	CXADR	2024.2	2023.84	1801.21	2247.56
Xelaev18011591m	ST3GAL6	175.644	0	175.644	0
Xelaev18011598m	ZP4	246.107	101.74	528.598	107.984
Xelaev18011600m	CMSS1	393.63	0	415.944	371.316
Xelaev18011602m	TBC1D23	188.705	210.38	179.5	176.236
Xelaev18011606m	HIST1H2AA	1762.75	3449.66	0	75.835
Xelaev18011610m	FANCB	152.589	110.88	278.769	68.119
Xelaev18011616m	PIR	170.69	0	191.549	149.831
Xelaev18011617m	CTPS2	874.362	158.276	1109.78	1355.03
Xelaev18011629m	AKAP10	93.718	0	93.718	0
Xelaev18011636m	SHPK	223.15	0	425.624	20.676
Xelaev18011645m	TBL2	151.322	208.546	0	94.099
Xelaev18011649m	CENPV	27.248	0	0	27.248
Xelaev18011652m	NCOR1	61.989	0	94.71	29.267
Xelaev18011658m	SPECC1	52.002	36.006	90.145	29.855
Xelaev18011659m	ABR	67.455	0	85.175	49.736
Xelaev18011668m	CPD	1060.36	196.671	2130.84	853.563
Xelaev18011670m	SSH2	20.112	0	7.123	33.101
Xelaev18011671m	NSRP1	983.074	1458.62	925.891	564.707
Xelaev18011675m	BLMH	457.783	751.26	127.701	494.387
Xelaev18011679m	GIT1	171.761	277.175	84.803	153.305
Xelaev18011680m	NUFIP2	311.611	706.693	9.853	218.287
Xelaev18011685m	MYO18A	142.5	278.58	6.419	0
Xelaev18011686m	PIPOX	292.096	123.822	242.457	510.008
Xelaev18011690m	DHRS13	1707.25	1595.88	1338.18	2187.69
Xelaev18011693m	FLOT2	366.104	1013.94	26.74	57.633
Xelaev18011699m	UNC119	332.464	0	332.464	0
Xelaev18011700m	PIGS	1781.09	1387.72	1759.85	2195.69
Xelaev18011701m	ALDOC	36489.6	58146.4	41209.5	10112.9
Xelaev18011702m	SPAG5	659.036	35.214	860.473	1081.42
Xelaev18011704m	KIAA0100	112.853	131.365	111.97	95.224
Xelaev18011706m	SUPT6H	63.247	98.888	33.655	57.199
Xelaev18011708m	APRT	1059.61	1038.83	1788.96	351.027
Xelaev18011715m	VTN	19070	10850.2	23068.2	23291.6
Xelaev18011717m	TMEM199	1327.88	291.12	1043.91	2648.6
Xelaev18011718m	POLDIP2	306.659	0	245.361	367.956
Xelaev18011719m	TSR1	1884.6	5374.64	119.971	159.202
Xelaev18011720m	SRR	411.383	87.316	420.58	726.254
Xelaev18011721m	SMG6	21.907	0	21.907	0
Xelaev18011727m	DPH1	614.615	77.98	391.237	1374.63
Xelaev18011729m	RPA1	5558.73	5998.69	6355.39	4322.11
Xelaev18011730m	SMYD4	39.15	0	54.852	23.449
Xelaev18011732m	SERPINF2	68.015	0	0	68.015
Xelaev18011733m	WDR81	175.479	88.426	214.149	223.863
Xelaev18011739m	PNPLA4	271.479	134.972	560.132	119.334
Xelaev18011742m	PUDP	3993.64	6162.11	2814.7	3004.09
Xelaev18011750m	ARSD	2717.51	1538.99	2822	3791.54
Xelaev18011753m	CD99	287.774	256.945	0	318.603
Xelaev18011757m	DHRSX	191.217	374.145	8.289	0
Xelaev18011764m	ASMTL	1905.45	2567.03	1773.05	1376.27
Xelaev18011786m	PRDX4	103.971	0	138.617	69.324
Xelaev18011792m	BUD23	81.583	0	110.754	52.412
Xelaev18011797m	MKS1	62.807	0	62.807	0
Xelaev18011799m	FKBP6	1090.35	0	1142.3	1038.41
Xelaev18011800m	BAZ1B	105.024	140.086	69.963	0
Xelaev18011801m	NSUN5	210.91	50.437	460.172	122.12
Xelaev18011809m	METTL27	558.785	0	199.123	918.447
Xelaev18011813m	ABHD11	217.305	90.443	27.41	534.063
Xelaev18011833m	ARSD	135.907	0	198.832	72.983
Xelaev18011836m	APOO	7633.37	6335.23	8850.61	7714.27
Xelaev18011839m	PDHA1	17461.6	13778.5	11269.1	27337.1
Xelaev18011842m	MAP3K15	104.885	0	120.675	89.096
Xelaev18011847m	RPS6KA3	1338.91	628.987	1077.26	2310.49
Xelaev18011854m	SMS	51.166	0	0	51.166
Xelaev18011873m	AIFM3	406.216	337.177	485.253	396.219
Xelaev18011875m	ATP5F1	17845.1	9096.94	15600.5	28837.9
Xelaev18011881m	PITPNA	345.646	661.051	80.757	295.13
Xelaev18011885m	MYO1C	177.898	0	0	177.898
Xelaev18011888m	CRK	704.436	419.653	635.851	1057.8
Xelaev18011896m	CUX1	51.004	41.766	62.818	48.428
Xelaev18011904m	IFT22	1293.15	0	1103.45	1482.84
Xelaev18011909m	PRKRIP1	1347.17	2011.89	1359.88	669.735
Xelaev18011911m	IFT20	120.521	0	0	120.521
Xelaev18011916m	METTL16	282.352	64.818	344.623	437.615
Xelaev18011918m	CLUH	1045.97	601.045	1125.94	1410.93
Xelaev18011926m	NCBP3	85.065	70.101	0	100.03
Xelaev18011946m	C6ORF132	123.995	0	98.406	149.583
Xelaev18011953m	HSD11B1	379.011	488.169	269.854	0
Xelaev18011978m	RPLP2	65635.3	42524.6	25144.4	129237
Xelaev18011990m	CRY1	409.477	335.405	726.751	166.274
Xelaev18012000m	CSDE1	2391.65	2666.72	1658.96	2849.26
Xelaev18012002m	NRAS	660.67	1184.05	0	137.287
Xelaev18012007m	TRIM33	88.065	0	114.739	61.392
Xelaev18012020m	ADPRHL2	2876.49	1669.93	1414.51	5545.03
Xelaev18012025m	MAP7D1	133.942	124.857	64.846	212.122
Xelaev18012040m	MYCBP	2769.24	5360.41	178.082	0
Xelaev18012046m	UTP11	199.028	360.139	72.583	164.363
Xelaev18012050m	RPA2	2110.34	0	1794.95	2425.72
Xelaev18012051m	EYA3	304.003	411.384	351.798	148.828
Xelaev18012059m	SNRNP40	633.918	650.13	655.845	595.78
Xelaev18012060m	ZCCHC17	286.702	556.009	0	17.395
Xelaev18012070m	CTPS1	962.853	274.363	2334.08	280.112
Xelaev18012073m	RCC1	560.482	1031.43	169.941	480.078
Xelaev18012082m	YTHDF2	258.145	0	499.587	16.702
Xelaev18012089m	PHACTR4	276.335	316.918	252.404	259.682
Xelaev18012091m	MED18	279.547	0	279.547	0
Xelaev18012092m	SESN2	335.421	0	335.421	0
Xelaev18012097m	WASF2	320.382	0	499.998	140.765
Xelaev18012098m	WDTC1	154.367	0	144.66	164.073
Xelaev18012104m	KDF1	60.526	0	47.119	73.932
Xelaev18012105m	NUDC	1789.06	2532.98	1573.61	1260.58
Xelaev18012108m	ARID1A	308.476	149.348	390.041	386.038
Xelaev18012109m	RPS6KA1	740.129	226.524	687.767	1306.1
Xelaev18012110m	HMGN2	12091	23604.7	0	577.415
Xelaev18012116m	CEP85	203.184	46.929	526.917	35.706
Xelaev18012118m	CISD3	13328.1	6323.65	7930.48	25730.2
Xelaev18012129m	CNKSR1	55.477	48.807	50.451	67.172
Xelaev18012140m	SLC30A2	233.802	0	96.479	371.125
Xelaev18012144m	PAFAH2	84.114	0	84.114	0
Xelaev18012146m	STMN1	32119.6	32119.6	0	0
Xelaev18012148m	ABHD10	2922.93	3995.84	851.826	3921.12
Xelaev18012161m	TADA2A	36.464	0	20.809	52.118
Xelaev18012172m	TUBA1A	7060.81	5528.14	12689.3	2964.98
Xelaev18012175m	IPO9	1079.51	112.575	1897.8	1228.16
Xelaev18012188m	PARL	350.522	0	649.484	51.559
Xelaev18012193m	SARS	3069.31	4129.46	2903.47	2175.01
Xelaev18012218m	NUCKS1	1580.07	2383.38	0	776.75
Xelaev18012233m	ZNHIT3	716.75	922.106	511.394	0
Xelaev18012237m	RNPEP	2398.79	262.495	2454.41	4479.48
Xelaev18012267m	ANKS1A	26.995	0	26.995	0
Xelaev18012274m	RPS10	27091.9	27146.8	4907.34	49221.6
Xelaev18012283m	CSRP1	70.322	0	70.322	0
Xelaev18012297m	PPIL1	2328.62	2744.43	2209.23	2032.2
Xelaev18012307m	SARG	323.051	267.858	353.691	347.604
Xelaev18012308m	YOD1	1401.37	1418.68	1339.71	1445.73
Xelaev18012309m	PFKFB2	200.125	218.261	269.847	112.267
Xelaev18012313m	C4BPA	85.197	0	139.292	31.101
Xelaev18012318m	CD55	141.879	80.868	90.574	254.196
Xelaev18012321m	AP4B1	64.131	0	77.402	50.86
Xelaev18012341m	SLC16A1	1826.68	2988.93	664.439	0
Xelaev18012344m	MOV10	3044.22	1716.22	4103.68	3312.75
Xelaev18012347m	CAPZA1	5852.09	5185.67	620.411	11750.2
Xelaev18012356m	DDX20	1423.36	515.764	2075.74	1678.59
Xelaev18012378m	DYNLT3	104.962	0	0	104.962
Xelaev18012393m	ATP6AP2	972.793	372.549	1573.04	0
Xelaev18012394m	CXORF38	222.153	0	226.935	217.371
Xelaev18012395m	MED14	90.729	0	90.729	0
Xelaev18012398m	USP9X	180.513	20.646	287.385	233.508
Xelaev18012403m	DDX3X	1192.41	2486.4	492.103	598.727
Xelaev18012410m	MAOA	35.507	0	0	35.507
Xelaev18012420m	FUNDC1	152.1	190.162	114.038	0
Xelaev18012427m	SLC19A2	548.139	0	548.139	0
Xelaev18012431m	NME7	209.063	0	391.337	26.789
Xelaev18012432m	ATP1B1	550.3	359.919	0	740.681
Xelaev18012453m	PSMB2	3114.57	5809.5	448.691	3085.53
Xelaev18012457m	KIAA0319L	93.051	0	163.563	22.539
Xelaev18012458m	ZMYM4	110.67	0	110.67	0
Xelaev18012461m	SFPQ	74.188	0	74.608	73.768
Xelaev18012463m	TMEM35B	638.45	585.279	691.621	0
Xelaev18012475m	HNRNPR	485.6	728.952	441.538	286.309
Xelaev18012476m	ATP5IF1	68496.1	87724.3	16858.3	100906
Xelaev18012483m	MECR	1942.72	1205.41	597.148	4025.59
Xelaev18012485m	SRSF4	202.108	0	0	202.108
Xelaev18012492m	STX12	2930.69	1986.57	1934.56	4870.93
Xelaev18012493m	YRDC	518.169	0	0	518.169
Xelaev18012497m	SF3A3	802.818	937.538	724.435	746.482
Xelaev18012510m	GNL2	322.467	878.921	34.452	54.028
Xelaev18012512m	LSM10	122.686	0	64.702	180.669
Xelaev18012521m	Xelaev18012521m	2001.29	467.901	1626.58	3909.38
Xelaev18012530m	OSCP1	316.205	100.21	608.055	240.351
Xelaev18012531m	MRPS15	2547.59	3041.9	4420.78	180.093
Xelaev18012535m	BSDC1	526.342	211.614	778.437	588.974
Xelaev18012536m	MARCKSL1	2117.68	5197.04	326.6	829.387
Xelaev18012537m	HDAC1	2414.45	1893.14	4958.75	391.461
Xelaev18012538m	TOR2A	443.902	0	0	443.902
Xelaev18012542m	EIF3I	6114.28	2020.27	8770.88	7551.69
Xelaev18012547m	KPNA6	3293.65	2051	2762.43	5067.52
Xelaev18012548m	TXLNA	748.863	748.863	0	0
Xelaev18012550m	IQCC	231.736	0	0	231.736
Xelaev18012563m	SMAP2	230.899	336.435	0	125.364
Xelaev18012573m	KDM1A	87.691	0	49.193	126.188
Xelaev18012575m	TMEM30B	235.752	178.431	103.211	425.612
Xelaev18012579m	ZMPSTE24	2412.72	2412.72	0	0
Xelaev18012588m	MTFR1L	320.339	566.246	0	74.432
Xelaev18012597m	MGST3	8862.34	6186.54	784.816	19615.7
Xelaev18012600m	SRRM1	90.614	0	54.47	126.757
Xelaev18012601m	CLIC4	469.288	90.215	801.164	516.484
Xelaev18012607m	Xelaev18012607m	210.999	0	138.657	283.341
Xelaev18012608m	YARS	4982.11	5268.05	1570.16	8108.14
Xelaev18012613m	ZBTB8OS	2071.32	2140.83	2371.17	1701.95
Xelaev18012617m	AK2	4244.34	7166.84	4774.51	791.664
Xelaev18012619m	NDUFS5	22658.9	12988.3	28343.3	26645.1
Xelaev18012621m	MACF1	50.722	20.612	83.714	47.841
Xelaev18012624m	FUCA1	2341.88	1699.45	2984.31	0
Xelaev18012625m	GALE	1609.59	2242.78	1111.92	1474.05
Xelaev18012626m	LYPLA2	8271.29	7488.44	547.591	16777.8
Xelaev18012627m	PITHD1	3020.21	2770.28	3300.27	2990.09
Xelaev18012630m	EEF1A1	6069.01	10848.2	554.049	6804.77
Xelaev18012631m	PPT1	518.431	543.753	811.592	199.948
Xelaev18012632m	CAP1	14893.8	7210.49	14491.1	22979.7
Xelaev18012635m	TRIT1	251.178	135.579	382.94	235.017
Xelaev18012641m	PPIE	2813.31	2659.45	2496.3	3284.17
Xelaev18012645m	CLTC	738.176	926.661	727.041	560.826
Xelaev18012646m	PTRH2	2012.59	2128.28	3296.66	612.823
Xelaev18012649m	TUBD1	188.851	0	217.438	160.263
Xelaev18012650m	RPS6KB1	2269.14	1771.89	1751.22	3284.3
Xelaev18012655m	BRIP1	42.196	33.002	52.731	40.856
Xelaev18012662m	BCAS3	94.764	0	168.536	20.992
Xelaev18012670m	ALDH3A2	1113.73	2525.93	510.881	304.373
Xelaev18012683m	TAF15	2061.82	4016.18	1121.15	1048.13
Xelaev18012684m	RHBDD2	434.22	68.013	837.742	396.905
Xelaev18012685m	POR	332.919	632.688	88.057	278.012
Xelaev18012686m	TMEM120A	575.862	488.582	663.142	0
Xelaev18012689m	MDH2	49785.9	20133.2	82664.4	46560.2
Xelaev18012698m	DTX2	115.754	0	182.336	49.172
Xelaev18012702m	SYAP1	1303.13	1399.18	1103.23	1406.98
Xelaev18012705m	TXLNG	36.271	0	36.271	0
Xelaev18012706m	RBBP7	170.431	0	0	170.431
Xelaev18012718m	SMG8	185.138	150.592	268.916	135.905
Xelaev18012721m	SKA2	1054.51	1346.3	753.635	1063.59
Xelaev18012724m	PPM1E	746.582	250.121	0	1243.04
Xelaev18012725m	RAD51C	180.264	0	157.203	203.325
Xelaev18012735m	VPS53	108.337	0	164.155	52.519
Xelaev18012740m	MRM3	81.276	97.74	106.739	39.35
Xelaev18012741m	GLOD4	5319.15	8739.94	2637.21	4580.29
Xelaev18012743m	GEMIN4	1069.02	306.17	1211.69	1689.2
Xelaev18012760m	ASL	13588.6	7935.3	9575.81	23254.6
Xelaev18012761m	GUSB	1087.36	408.516	1766.2	0
Xelaev18012764m	RMC1	255.453	0	275.715	235.192
Xelaev18012766m	CHCHD2	1924.11	0	2154.38	1693.83
Xelaev18012769m	SUMF2	488.731	742.866	272.901	450.427
Xelaev18012771m	CCT6A	11807.8	19862.5	13369.6	2191.26
Xelaev18012772m	NIPSNAP2	8672.31	13078.1	3966.81	8972.02
Xelaev18012773m	MRPS17	2259.89	2757.07	0	1762.72
Xelaev18012776m	SBDS	2174.2	2140.72	0	2207.69
Xelaev18012778m	TYW1	41.97	0	0	41.97
Xelaev18012789m	C11ORF54	9061.59	5586.06	8933.72	12665
Xelaev18012800m	RFC2	4028.1	2157.5	4126.63	5800.16
Xelaev18012802m	EIF4H	139.258	0	139.258	0
Xelaev18012803m	MYBBP1A	1789.51	2708.62	1362.31	1297.6
Xelaev18012807m	ANKFY1	397.392	0	717.869	76.915
Xelaev18012808m	CYB5D2	564.809	1406.89	162.834	124.708
Xelaev18012809m	ATP2A3	3032.91	1778.13	6754.37	566.214
Xelaev18012811m	CAMKK1	100.498	103.599	96.99	100.906
Xelaev18012817m	RCC1L	708.932	0	569.034	848.83
Xelaev18012818m	CEP97	242.346	94.211	427.651	205.176
Xelaev18012826m	ALCAM	280.304	280.304	0	0
Xelaev18012838m	CIP2A	269.372	358.284	255.453	194.381
Xelaev18012847m	AKAP1	1075.1	893.821	532.54	1798.92
Xelaev18012849m	NF1	35.604	75.719	14.047	17.045
Xelaev18012858m	RABEP1	475.924	542.989	247.882	636.903
Xelaev18012860m	NUP88	464.467	211.657	756.627	425.116
Xelaev18012861m	RPAIN	377.767	475.551	279.983	0
Xelaev18012862m	C1QBP	7835.32	11052.2	9161.64	3292.09
Xelaev18012865m	PCNP	1114.43	1011.92	283.781	2047.59
Xelaev18012866m	TRMT10C	131.836	229.3	34.371	0
Xelaev18012867m	FAM172BP	14.216	0	14.216	0
Xelaev18012868m	SENP7	50.737	0	0	50.737
Xelaev18012874m	GPM6B	2178.38	2611.25	590.944	3332.94
Xelaev18012876m	TRAPPC2	1998.99	0	0	1998.99
Xelaev18012877m	RAB9A	197.097	0	133.043	261.152
Xelaev18012887m	PRPS2	710.958	1497.02	161.011	474.841
Xelaev18012909m	GK	34.606	0	0	34.606
Xelaev18012917m	CCDC138	6.999	0	6.999	0
Xelaev18012918m	RANBP2	1560.33	937.105	1537.24	2206.62
Xelaev18012932m	CHST10	48.545	0	72.149	24.94
Xelaev18012935m	PDCL3	2390.09	3808.69	923.331	2438.25
Xelaev18012940m	CNOT11	555.906	555.906	0	0
Xelaev18012944m	MAP4K4	115.145	138.338	2.465	204.631
Xelaev18012963m	MRPS9	2872.65	3263.65	1194.09	4160.21
Xelaev18012965m	TGFBRAP1	86.748	0	0	86.748
Xelaev18012966m	C2ORF49	355.734	389.24	477.647	200.315
Xelaev18012970m	2019-09-10	880.155	571.699	1880.62	188.147
Xelaev18012976m	CDC16	596.933	175.106	924.646	691.047
Xelaev18012989m	EIF5B	637.491	558.566	719.196	634.71
Xelaev18012992m	TM2D3	204.464	0	14.401	394.527
Xelaev18012993m	TXNDC9	17753.9	21067.9	19019.8	13173.9
Xelaev18012997m	LIPT1	106.291	55.077	1.687	262.109
Xelaev18012998m	TSGA10	127.119	247.17	114.111	20.075
Xelaev18013007m	TMEM131	48.588	0	77.244	19.932
Xelaev18013011m	UBE3A	727.871	677.765	523.121	982.726
Xelaev18013025m	CYFIP1	87.502	104.184	9.934	148.388
Xelaev18013027m	TUBGCP5	155.111	0	197.875	112.347
Xelaev18013029m	SLC9A7	105.936	0	105.936	0
Xelaev18013039m	PPP2R3B	375.649	426.327	430.32	270.3
Xelaev18013047m	DCUN1D2	100.119	0	0	100.119
Xelaev18013049m	GRTP1	83.653	0	132.524	34.783
Xelaev18013051m	LAMP1	2275.98	2949.83	1047.28	2830.84
Xelaev18013053m	CUL4A	361.328	580.865	452.226	50.894
Xelaev18013054m	PCID2	225.67	0	263.584	187.757
Xelaev18013061m	TUBGCP3	350.936	112.091	531.233	409.484
Xelaev18013063m	ARHGEF7	28.743	38.59	18.896	0
Xelaev18013067m	CARS2	2030.22	1237.42	2036.87	2816.37
Xelaev18013068m	NAXD	935.016	617.693	521.55	1665.81
Xelaev18013078m	LIG4	50.827	0	81.796	19.858
Xelaev18013095m	TEX30	157.994	0	288.738	27.25
Xelaev18013098m	BHMT	456.862	69.188	844.537	0
Xelaev18013099m	ERCC5	184.36	86.987	168.279	297.813
Xelaev18013102m	TPP2	515.236	437.279	376.145	732.284
Xelaev18013110m	TMTC4	124.975	86.581	120.625	167.718
Xelaev18013111m	PCCA	6173.15	4776.55	7257.24	6485.66
Xelaev18013120m	CLYBL	1297.38	1378.72	1324.87	1188.54
Xelaev18013122m	TM9SF2	558.461	947.16	359.026	369.198
Xelaev18013124m	UBAC2	89.919	0	109.216	70.622
Xelaev18013132m	IPO5	517.528	727.607	0	307.449
Xelaev18013138m	UGGT2	4601.48	2852.44	5569.99	5381.99
Xelaev18013139m	DNAJC3	1035.18	1219.78	1202.12	683.631
Xelaev18013152m	DCT	756.159	0	486.964	1025.36
Xelaev18013183m	MYCBP2	44.216	0	15.581	72.851
Xelaev18013188m	CLN5	77.978	0	0	77.978
Xelaev18013189m	GATD3A	15764.3	16067	12214.8	19011.1
Xelaev18013192m	LMO7	420.59	438.071	385.32	438.379
Xelaev18013195m	UCHL3	30916.6	25298.7	29996.2	37455
Xelaev18013196m	COMMD6	209.239	420.259	133.319	74.139
Xelaev18013197m	TBC1D4	97.075	0	129.596	64.554
Xelaev18013200m	DIS3	427.358	368.327	340.004	573.744
Xelaev18013219m	TDRD3	72.203	0	118.752	25.653
Xelaev18013220m	DIAPH3	475.989	407.076	391.67	629.222
Xelaev18013232m	SUGT1	2054.79	1589.36	3551.97	1023.04
Xelaev18013235m	WBP4	216.063	204.453	227.673	0
Xelaev18013238m	NAA16	33.37	0	51.89	14.85
Xelaev18013240m	VWA8	492.711	223.414	639.328	615.391
Xelaev18013244m	AKAP11	21.364	0	37.141	5.586
Xelaev18013249m	DNAJC15	209.219	255.865	276.669	95.124
Xelaev18013254m	TSC22D1	457.687	194.451	84.29	1094.32
Xelaev18013257m	NUFIP1	271.724	228.641	314.807	0
Xelaev18013258m	GPALPP1	1084.41	1540.71	644.827	1067.68
Xelaev18013263m	TPT1	102437	74359.9	102713	130239
Xelaev18013267m	COG3	254.134	0	467.59	40.678
Xelaev18013272m	CPB2	93.42	0	0	93.42
Xelaev18013279m	ESD	886.568	1373.23	1180.25	106.225
Xelaev18013281m	SUCLA2	10036.7	10735.2	8611.47	10763.4
Xelaev18013282m	NUDT15	568.414	0	568.414	0
Xelaev18013284m	ITM2B	202.736	77.374	0	328.097
Xelaev18013313m	FKBP11	596.234	591.221	1155.55	41.935
Xelaev18013320m	PRKAG1	250.338	0	394.366	106.311
Xelaev18013321m	KMT2D	8.35	0	7.838	8.862
Xelaev18013334m	Xelaev18013334m	23.513	0	23.513	0
Xelaev18013338m	SPATS2	27.109	0	13.857	40.362
Xelaev18013345m	CD63	15063.9	11829.3	16654.2	16708.3
Xelaev18013349m	WDR61	2102.32	1075.76	4578.76	652.435
Xelaev18013350m	CNPY2	8517.31	5242.83	7670.46	12638.6
Xelaev18013352m	CS	183.134	224.194	166.113	159.094
Xelaev18013353m	COQ10B	46.377	0	0	46.377
Xelaev18013355m	UQCC3	16777.3	46212.2	887.868	3231.86
Xelaev18013364m	MYL6	2390.46	2583.76	2197.15	0
Xelaev18013367m	ZC3H10	31.557	0	31.557	0
Xelaev18013368m	PA2G4	11309.4	19661.6	5703.87	8562.84
Xelaev18013373m	SUOX	286.742	343.792	157.824	358.61
Xelaev18013377m	CDK2	77.382	0	69.361	85.403
Xelaev18013378m	PMEL	173.361	0	154.471	192.25
Xelaev18013381m	PAN2	245.215	0	288.753	201.677
Xelaev18013384m	SARNP	1244.98	2373.01	0	116.953
Xelaev18013388m	MMP19	19.382	0	19.382	0
Xelaev18013389m	PYM1	623.751	744.126	1049.91	77.213
Xelaev18013392m	TIMELESS	293.163	457.938	155.925	265.626
Xelaev18013399m	BAZ2A	95.906	48.397	144.52	94.8
Xelaev18013400m	ATP5F1B	24214	5182.52	54100.9	13358.4
Xelaev18013402m	PTGES3	5930.75	6505.51	0	5355.98
Xelaev18013403m	NACA	2576.76	4902.33	2483.88	344.083
Xelaev18013406m	RDH16	1565.49	451.234	2006.41	2238.83
Xelaev18013410m	RDH16	664.586	1290.56	524.767	178.434
Xelaev18013411m	HSD17B6	52.022	0	41.703	62.34
Xelaev18013417m	MYO1B	165.213	281.165	86.901	127.572
Xelaev18013429m	SHMT2	13141.4	8232.8	20801.5	10389.8
Xelaev18013438m	MARS	2333.57	1412.46	2357.04	3231.21
Xelaev18013439m	MARS	2969.86	1841.72	3073.83	3994.03
Xelaev18013442m	DCTN2	2139.2	3636.96	1240.18	1540.44
Xelaev18013444m	PIP4K2C	977.177	535.849	1442.55	953.134
Xelaev18013451m	B4GALNT1	227.734	0	272.793	182.676
Xelaev18013468m	METTL1	1103.4	699.166	637.991	1973.06
Xelaev18013471m	TSFM	1039.19	1352.74	965.395	799.448
Xelaev18013476m	LETMD1	198.34	198.34	0	0
Xelaev18013507m	ATF1	1744.79	1228.4	0	2261.17
Xelaev18013511m	LARP4	177.013	366.578	161.571	2.89
[truncated: 5,975 more rows]

## Sheet: SummedMassProteinConcentration
GeneSymbol	Mean Concentration,nM
A2M	2598.46
A2ML1	233.303
AAAS	192.047
AADAC	6.858
AADACL4	12.144
AADAT	77.394
AAGAB	78.417
AAK1	54.374
AAMDC	63.407
AAMP	391.794
AAR2	99.995
AARS	1915.49
AARS2	67.369
AARSD1	552.752
AASDH	2.363
AASS	589.446
AATF	5.755
ABAT	1186.33
ABCA3	14.419
ABCA9	0.107
ABCB1	40.411
ABCB10	3.297
ABCB5	6.14
ABCB6	64.993
ABCB7	266.523
ABCB8	17.134
ABCC1	80.245
ABCC10	7.988
ABCD3	79.717
ABCE1	265.908
ABCF1	1027.21
ABCF2	84.654
ABCF3	493.579
ABHD10	324.77
ABHD11	24.145
ABHD12	7.525
ABHD14A	21.494
ABHD14B	1478.55
ABHD16A	75.837
ABHD17B	69.332
ABHD18	9.504
ABHD5	3.526
ABI2	106.383
ABO	54.813
ABR	9.108
ABRACL	2751.89
ABRAXAS1	5.49
ABRAXAS2	19.481
ACAA1	761.439
ACAA2	3099.3
ACACB	12.11
ACAD10	232.285
ACAD11	251.703
ACAD8	408.111
ACAD9	2668.26
ACADL	3551.84
ACADM	1288.02
ACADS	2221.28
ACADSB	612.96
ACADVL	1227.18
ACAP2	11.406
ACAT1	1341.83
ACAT2	217.805
ACBD3	79.095
ACBD5	18.328
ACBD6	154.65
ACBD7	511.551
ACD	3.006
ACIN1	24.988
ACLY	554.773
ACO1	127.441
ACO2	4969.7
ACOT11	42.626
ACOT12	31.618
ACOT13	1619.58
ACOT2	30.751
ACOT7	202.796
ACOT8	10.537
ACOX1	195.939
ACOX2	200.898
ACOX3	131.479
ACOXL	31.597
ACP1	876.053
ACP6	218.794
ACSBG2	208.916
ACSF3	15.437
ACSL1	604.724
ACSL3	70.986
ACSL4	394.319
ACSM3	5.287
ACSS2	48.907
ACSS3	41.095
ACTL6A	81.948
ACTN1	474.785
ACTN4	651.059
ACTR10	94.03
ACTR3	802.061
ACTR5	73.413
ACTR6	14.263
ACTR8	29.158
ACY1	35.838
ACYP1	70.632
ADA	2.501
ADAD1	43.834
ADAL	23.943
ADAM10	31.347
ADAM17	2.133
ADAM9	10.33
ADAR	163.437
ADAT1	11.921
ADCK2	7.828
ADCK5	29.49
ADD1	57.674
ADGRG1	20.245
ADH1B	636.248
ADH5	1018.94
ADI1	37.866
ADK	1090.96
ADNP	54.947
ADNP2	3.676
ADO	63.225
ADPGK	169.945
ADPRH	326.308
ADPRHL2	332.034
ADPRM	86.675
ADRM1	334.772
ADSL	2101.37
ADSS	1275.23
ADSSL1	13.296
AFDN	47.459
AFG3L2	1018.96
AFMID	75.084
AFTPH	17.967
AGA	165.875
AGAP3	10.532
AGFG1	192.031
AGGF1	7.664
AGK	354.328
AGL	698.289
AGMAT	178.794
AGPAT1	81.398
AGPAT3	340.109
AGPAT5	62.737
AGPS	194.398
AGRN	1.669
AGTRAP	291.573
AHCTF1	66.725
AHCY	4846.26
AHNAK	137.59
AHSA1	243.051
AIDA	16.894
AIFM1	668.679
AIFM2	115.866
AIFM3	45.135
AIMP1	1545.45
AIMP2	707.572
AIP	103.478
AK2	1595.64
AK6	172.263
AK7	6.566
AKAP1	190.253
AKAP10	14.359
AKAP11	2.374
AKAP12	76.028
AKAP17A	3.095
AKAP7	19.552
AKAP8	6.178
AKAP8L	5.112
AKAP9	7.013
AKR1A1	1203.19
AKR1B1	3991.31
AKR1C1	339.789
AKR1C3	283.615
AKR1C4	820.575
AKR7A2	626.752
AKT1S1	116.25
AKT2	116.662
ALAD	191.736
ALAS1	60.301
ALB	1740.38
ALCAM	31.145
ALDH16A1	477.997
ALDH18A1	565.326
ALDH1A3	11.053
ALDH1L2	12.023
ALDH2	3507.48
ALDH3A2	776.597
ALDH3B1	226.493
ALDH4A1	29.907
ALDH5A1	151.14
ALDH6A1	3353.64
ALDH7A1	1404.75
ALDH9A1	1413.2
ALDOA	4373.9
ALDOC	4488.91
ALG1	77.06
ALG10	16.325
ALG11	62.964
ALG13	207.208
ALG14	111.35
ALG2	31.326
ALG3	179.196
ALG5	199.912
ALG8	922.474
ALG9	16.708
ALKBH1	62.309
ALKBH3	127.481
ALKBH6	11.144
ALKBH7	71.087
ALKBH8	5.223
ALMS1	61.313
ALOXE3	4210.26
ALPK2	1.991
ALPL	40.429
ALYREF	102.804
AMACR	231.716
AMBRA1	8.46
AMDHD1	770.344
AMDHD2	328.792
AMT	693.752
ANAPC1	43.835
ANAPC2	59.094
ANAPC4	101.286
ANAPC5	53.132
ANAPC7	57.503
ANGEL1	4.836
ANK1	3.8
ANK2	0.833
ANKFY1	86.531
ANKHD1	34.153
ANKLE1	1.629
ANKLE2	27.471
ANKMY2	219.429
ANKRD13A	21.102
ANKRD16	8.991
ANKRD17	1.602
ANKRD27	52.735
ANKRD28	52.171
ANKRD39	39.425
ANKRD44	22.866
ANKRD49	33.095
ANKS1A	2.999
ANKZF1	20.143
ANLN	111.691
ANO1	53.909
ANO10	89.104
ANO6	4.966
ANP32A	302.233
ANP32B	1319.88
ANP32E	2211.44
ANPEP	19.289
ANXA1	2341.96
ANXA11	57.148
ANXA2	252.497
ANXA2P2	18.887
ANXA3	2966.56
ANXA4	1021.3
ANXA5	2207.11
ANXA6	37.628
ANXA7	2180.38
AOX1	682.196
AP1AR	22.844
AP1B1	261.378
AP1G1	52.275
AP1M1	154.991
AP1M2	19.953
AP2A1	71.195
AP2A2	211.262
AP2B1	92.555
AP3B1	77.858
AP3D1	158.746
AP3M2	72.874
AP3S1	95.492
AP3S2	36.187
AP4B1	7.126
AP4E1	14.997
AP4M1	10.477
AP5M1	25.92
AP5S1	38.656
AP5Z1	9.606
APAF1	172.919
APBA3	50.001
APBB1	26.15
APC	2.883
APCS	1800.87
APEX1	203.867
APEX2	23.57
API5	198.574
APLF	18.135
APMAP	879.892
APOA1	98.619
APOB	13507.2
APOL2	546.492
APOO	848.152
APOOL	588.897
APPL1	15.385
APPL2	73.424
APRT	229.098
APTX	76.575
AQR	154.564
ARAF	80.687
ARAP1	4.245
ARCN1	751.637
ARFGAP2	42.451
ARFGAP3	125.536
ARFGEF1	25.572
ARFGEF2	5.026
ARFIP1	200.609
ARFIP2	32.061
ARHGAP1	38.112
ARHGAP10	10.229
ARHGAP12	34.655
ARHGAP17	94.036
ARHGAP18	114.578
ARHGAP25	10.8
ARHGAP29	3.13
ARHGAP35	35.304
ARHGAP40	42.598
ARHGAP5	3.19
ARHGDIA	1146.88
ARHGDIG	765.14
ARHGEF1	17.159
ARHGEF10	15.439
ARHGEF10L	3.43
ARHGEF12	6.022
ARHGEF16	22.208
ARHGEF19	3.494
ARHGEF5	1.191
ARHGEF7	27.039
ARID1A	47.733
ARID1B	3.351
ARID2	19.318
ARID4A	5.318
ARIH1	14.993
ARIH2	311.88
ARL10	8.604
ARL14EP	12.619
ARL2	289.053
ARL2BP	206.595
ARL6	26.178
ARL6IP1	433.783
ARL6IP4	9.084
ARL6IP5	1337.52
ARL9	56.789
ARMC1	339.695
ARMC10	55.417
ARMC2	7.145
ARMC4	1.703
ARMC6	133.513
ARMC7	52.077
ARMC8	28.804
ARMC9	16.895
ARMH3	42.976
ARMT1	241.273
ARPC1A	619.001
ARPC1B	80.455
ARPC2	290.476
ARPC4	624.559
ARPC5	867.289
ARPC5L	216.358
ARPIN	112.556
ARPP19	526.61
ARSA	75.387
ARSB	248.215
ARSD	317.046
ARVCF	16.228
ASAH1	157.474
ASAP2	14.285
ASB3	3.067
ASB6	11.229
ASCC1	60.828
ASCC2	28.485
ASCC3	69.799
ASF1B	203.231
ASL	1509.84
ASMTL	211.716
ASNA1	402.892
ASNSD1	33.198
ASPG	14.317
ASPH	187.898
ASPSCR1	335.424
ASRGL1	166.279
ASTE1	6.535
ASTL	61.645
ATAD1	62.129
ATAD2	53.244
ATAD2B	1.783
ATAD3A	176.956
ATAD5	2.294
ATAT1	25.335
ATE1	0.42
ATF1	233.703
ATF7IP	15.357
ATF7IP2	1.764
ATG12	155.507
ATG14	19.062
ATG16L1	17.474
ATG2A	14.212
ATG2B	32.208
ATG3	86.825
ATG4A	54.056
ATG5	141.447
ATG7	394.918
ATIC	2611.16
ATL2	147.544
ATL3	673.128
ATMIN	18.649
ATOX1	1504.31
ATP11C	4
ATP13A1	98.245
ATP13A2	2.281
ATP13A4	1.174
ATP1A1	186.653
ATP1B1	148.254
ATP1B3	417.359
ATP23	102.633
ATP2A2	455.034
ATP2A3	367.678
ATP2B1	61.422
ATP2B4	20.285
ATP2C1	14.975
ATP5F1	4939.35
ATP5F1A	4081.05
ATP5F1B	5336.29
ATP5F1C	2095.86
ATP5F1D	1345.65
ATP5F1E	1674.99
ATP5H	5551.45
ATP5IF1	11430.2
ATP5J	3475.03
ATP5L	3091.65
ATP5ME	3201.44
ATP5MF	4947.92
ATP5PO	9437.21
ATP5S	505.769
ATP6AP1	393.827
ATP6AP2	259.83
ATP6V0A1	43.544
ATP6V0A2	150.823
ATP6V0D1	821.038
ATP6V1A	678.063
ATP6V1B2	338.29
ATP6V1C1	404.616
ATP6V1D	345.878
ATP6V1E1	357.631
ATP6V1F	14.377
ATP6V1H	314.602
ATP7A	1.882
ATP8A1	5.281
ATP8B1	211.744
ATP8B2	9.418
ATP9A	1.063
ATP9B	22.466
ATPAF1	290.767
ATPAF2	157.815
ATR	39.355
ATRN	40.602
ATRX	70.042
ATXN10	382.635
ATXN2	142.416
ATXN2L	224.779
ATXN3	103.73
AUH	77.8
AUP1	124.991
AURKA	179.986
AURKAIP1	203.72
AURKB	107.623
AVEN	123.216
AVL9	43.617
AZI2	61.239
B2M	22.847
B3GLCT	128.591
B3GNT2	13.596
B4GALNT1	25.304
B4GALNT2	15.025
B4GAT1	1.434
BAAT	22.256
BABAM1	117.206
BABAM2	44.837
BACE2	39.415
BAG1	452.805
BAG5	44.488
BAG6	221.714
BAHCC1	1.387
BAIAP2	7.692
BAIAP2L1	14.739
BANF1	905.269
BANP	23.397
BARD1	9.167
BASP1	27.167
BAX	25.15
BAZ1A	132.598
BAZ1B	17.437
BAZ2A	10.656
BBS1	3.856
BBS2	19.592
BBS4	12.008
BBS7	50.793
BBS9	12.164
BCAM	72.024
BCAP29	271.899
BCAP31	1172.74
BCAS2	161.783
BCAS3	10.529
BCAT1	313.663
BCCIP	353.684
BCDIN3D	16.574
BCKDHA	427.416
BCKDHB	226.795
BCL2L13	77.305
BCL2L14	43.438
BCL9	20.902
BCO2	437.318
BCS1L	198.091
BDH1	234.181
BDH2	1135.74
BDP1	0.838
BFAR	1.687
BGN	1.399
BHMT	304.841
BIN1	282.814
BIRC2	43.465
BIRC3	54.435
BIRC5	55.635
BIRC6	7.48
BLM	6.268
BLMH	102.184
BLNK	0.61
BLOC1S3	47.071
BLOC1S4	28.482
BLOC1S5	12.71
BLVRA	86.206
BLVRB	166.953
BMS1	38.088
BOD1	91.051
BOD1L1	27.095
BOLA1	163.131
BOLA2	1651.1
BOLA3	1075.78
BOP1	57.261
BORCS5	284.761
BORCS6	14.133
BORCS7	41.804
BORCS8	48.193
BPGM	14.232
BPHL	62.135
BPNT1	1146.19
BPTF	52.62
BRAF	84.664
BRAP	61.539
BRAT1	12.149
BRCA1	7.831
BRCA2	0.545
BRD4	23.374
BRD7	26.08
BRD8	7.06
BRF1	30.031
BRI3BP	217.44
BRIP1	4.688
BRIX1	32.779
BRK1	38.305
BROX	185.669
BSCL2	105.613
BSDC1	70.995
BSN	38.011
BTAF1	26.23
BTBD19	124.296
BTD	50.421
BTG4	6.821
BTN2A2	5.644
BTRC	30.42
BUB1	23.849
BUB1B	61.356
BUD13	4.692
BUD23	9.065
BYSL	196.689
BZW1	1307.56
C10ORF88	27.316
C11ORF54	1006.84
C11ORF68	180.916
C11ORF98	262.92
C12ORF10	234.42
C12ORF4	22.441
C12ORF45	283.593
C12ORF57	79.758
C14ORF119	34.123
C15ORF40	22.853
C16ORF58	48.014
C16ORF62	114.8
C17ORF75	23.846
C18ORF25	15.537
C18ORF32	334.276
C19ORF12	70.309
C19ORF25	108.143
C19ORF47	13.424
C19ORF53	1.536
C19ORF54	11.4
C1GALT1C1	24.13
C1ORF112	7.867
C1ORF159	29.439
C1ORF43	13.289
C1ORF50	43.612
C1QBP	2089.92
C1QTNF4	45.929
C1R	39.393
C20ORF27	13.148
C21ORF2	97.297
C22ORF39	68.699
C2CD2L	45.007
C2CD3	5.054
C2CD5	72.407
C2ORF49	55.386
C2ORF69	13.271
C2ORF76	167.344
C3	1607.27
C3ORF38	4.412
C4B	132.813
C4BPA	9.466
C4ORF3	160.716
C5	344.577
C5ORF22	52.342
C5ORF63	14.957
C6ORF106	136.344
C6ORF120	205.599
C6ORF132	13.777
C6ORF136	26.953
C6ORF203	106.563
C7ORF25	94.424
C7ORF57	21.16
C8A	24.876
C8B	12.161
C8ORF33	50.861
C8ORF59	114.137
C8ORF76	21.265
C8ORF82	5.614
C9	634.628
C9ORF40	47.75
C9ORF64	199.525
C9ORF72	49.809
C9ORF78	80.267
CA12	35.458
CA2	34.144
CA5B	94.799
CAB39L	200.042
CABIN1	14.954
CACNA1B	157.822
CACYBP	297.153
CAD	448.342
CADPS2	16.532
CALB2	1.776
CALCOCO2	169.608
CALD1	108.46
CALHM4	14.662
CALR	4170.94
CALU	298.074
CAMK1	28.93
CAMK2G	221.52
CAMKK1	11.166
CAMLG	160.471
CAMSAP1	30.208
CAMSAP3	6.178
CAND1	196.247
CANT1	5.933
CANX	635.124
CAP1	2409.5
CAP2	60.07
CAPG	25.944
CAPN1	1177.72
CAPN2	519.062
CAPN5	2.921
CAPN7	50.951
CAPN8	228.794
CAPN9	8.765
CAPNS1	739.081
CAPRIN1	408.14
CAPRIN2	155.147
CAPZA1	650.232
CAPZA2	100.495
CAPZB	1739.68
CARF	1.082
CARHSP1	837.838
CARM1	929.599
CARMIL1	17.098
CARNMT1	11.452
CARS	711.925
CARS2	225.58
CASC1	7.001
CASC3	27.026
CASC4	68.782
CASP10	30.076
CASP6	427.77
CASP7	285.676
CASP8AP2	4.452
CASP9	106.856
CAST	317.649
CASTOR1	19.09
CAT	946.05
CAVIN1	91.881
CAVIN2	27.788
CBL	13.109
CBLL1	9.656
CBR1	2624.75
CBR4	91.242
CBS	264.487
CBWD2	336.12
CBX2	24.504
CBY1	37.503
CC2D1A	220.86
CC2D1B	5.113
CCAR1	25.166
CCDC113	181.294
CCDC115	70.27
CCDC12	108.048
CCDC124	479.043
CCDC127	142.418
CCDC134	310.068
CCDC138	0.778
CCDC14	6.76
CCDC155	117.622
CCDC167	56.323
CCDC174	22.477
CCDC18	16.524
CCDC186	11.391
CCDC22	124.616
CCDC25	298.454
CCDC32	92.643
CCDC43	55.997
CCDC47	235.611
CCDC51	65.965
CCDC58	496.886
CCDC66	7.274
CCDC88A	2.241
CCDC88C	2.105
CCDC9	94.305
CCDC90B	347.037
CCDC93	216.472
CCDC97	28.442
CCHCR1	9.324
CCM2	8.62
CCNB1	49.299
CCNB2	113.148
CCNC	44.756
CCNDBP1	71.894
CCNH	59.372
CCNK	29.722
CCPG1	52.799
CCS	137.427
CCSER2	0.849
CCSMST1	6.313
CCT2	2516.18
CCT3	4353.93
CCT4	3116.01
CCT5	3847.08
CCT6A	2695.89
CCT7	3112.17
CCT8	3954.64
CCZ1	49.004
CD274	171.58
CD2AP	101.312
CD2BP2	42.64
CD3EAP	39.009
CD55	15.764
CD59	213.779
CD63	5439.36
CD82	509.346
CD99	31.975
CDAN1	26.746
CDC123	50.77
CDC16	66.326
CDC20	7.059
CDC23	103.098
CDC25C	11.279
CDC26	55.152
CDC27	15.539
CDC37	935.956
CDC37L1	110.661
CDC40	14.169
CDC42	1102.61
CDC42BPA	17.594
CDC42BPB	3.411
CDC42EP4	21.08
CDC45	30.809
CDC5L	161.469
CDC6	29.399
CDC7	171.316
CDC73	11.63
CDCA2	4.424
CDCA3	13.597
CDCA7	131.283
CDCA8	189.72
CDCP1	14.36
CDH1	212.891
CDK1	1055
CDK10	30.224
CDK11B	20.681
CDK12	27.596
CDK13	10.149
CDK2	25.351
CDK20	32.692
CDK2AP1	339.794
CDK5	106.44
CDK5RAP1	14.804
CDK5RAP3	129.62
CDK7	60.078
CDKAL1	90.969
CDKN2AIP	2.381
CDO1	13.035
CDR2	8.841
CDT1	15.333
CDV3	535.837
CEBPZ	33.609
CELF1	113.325
CENPC	11.206
CENPE	40.089
CENPI	4.945
CENPJ	1.204
CENPO	29.102
CENPP	33.667
CENPS	27.831
CENPT	6.254
CENPU	11.247
CENPV	3.028
CEP120	6.566
CEP128	1.691
CEP131	12.833
CEP135	2.328
CEP152	5.807
CEP162	22.275
CEP192	44.177
CEP290	1.161
CEP350	5.265
CEP41	94.484
CEP44	52.443
CEP55	71.045
CEP63	9.343
CEP70	1.652
CEP76	5.185
CEP83	12.519
CEP85	65.68
CEP97	26.927
CEPT1	27.891
CER1	16.084
CERS2	116.319
CES2	23.796
CETN2	422.745
CFAP298	16.655
CFAP300	130.765
CFAP36	60.336
CFAP43	2.026
CFAP97	19.58
CFB	7.202
CFDP1	108.761
CFH	21.413
CFL1	4221.36
CFL2	492.937
CGN	47.112
CGNL1	17.077
CHAF1A	184.758
CHAF1B	186.76
CHAMP1	16.284
CHCHD1	47.884
CHCHD2	907.557
CHCHD3	1104.89
CHCHD4	39.87
CHCHD6	875.854
CHCHD7	204.903
CHD1	8.823
CHD4	135.451
CHD7	11.191
CHD8	35.204
CHEK1	75.64
CHEK2	156.525
CHERP	68.64
CHFR	11.32
CHID1	75.494
CHM	130.639
CHML	5.999
CHMP1A	714.565
CHMP2A	186.028
CHMP2B	382.954
CHMP4B	519.017
CHMP4C	75.514
CHMP5	870.711
CHMP6	115.166
CHMP7	148.592
CHN1	62.701
CHORDC1	171.204
CHP1	109.253
CHPT1	22.083
CHRAC1	164.065
CHST10	5.394
CHTF18	33.941
CHTOP	23.985
CHUK	26.334
CHURC1	25.739
CIAO1	107.385
CIAO2A	78.178
CIAPIN1	1337.63
CIB1	37.494
CIP2A	29.93
CIPC	16.445
CIRBP	12089.3
CISD1	7563.98
CISD3	1480.9
CIT	19.377
CIZ1	1.994
CKAP2	17.369
CKAP4	285.808
CKAP5	246.721
CKB	7890.21
CKM	245.351
CLASP1	8.029
CLASP2	12.018
CLCC1	108.877
CLCN5	44.22
CLCN7	16.926
CLDN6	87.558
CLEC16A	4.167
CLGN	25.014
CLIC1	1069.52
CLIC4	79.835
CLIC6	17.836
CLINT1	401.931
CLIP1	161.636
CLN5	8.664
CLN6	17.268
CLNS1A	332.626
CLP1	31.786
CLPB	48.805
CLPP	947.511
CLPTM1	161.223
CLPTM1L	94.107
CLPX	108.754
CLSPN	25.317
CLTA	299.686
CLTB	713.226
CLTC	192.688
CLTCL1	39.884
CLUAP1	30.84
CLUH	342.739
CLYBL	144.153
CMAS	123.179
CMBL	116.525
CMC1	117.316
CMC4	48.332
CMPK1	764.731
CMSS1	43.737
CMTM6	26.471
CMTR1	37.34
CMTR2	20.172
CNBP	265.047
CNDP2	3826.47
CNFN	612.85
CNKSR1	6.164
CNN1	37.373
CNN3	328.39
CNNM4	12.589
CNOT1	67.589
CNOT10	97.83
CNOT11	61.767
CNOT2	94.134
CNOT3	124.846
CNOT4	29.586
CNP	201.611
CNPY2	1698.51
CNPY3	210.003
CNTNAP2	27.599
COA3	978.942
COA6	226.535
COA7	154.573
COASY	17.827
COBLL1	28.885
COG1	26.673
COG2	45.134
COG3	44.457
COG4	44.706
COG5	78.338
COG6	35.738
COG7	21.607
COG8	41.35
COIL	146.315
COL12A1	20.16
COL15A1	5.726
COL4A3BP	185.845
COL6A3	0.912
COLGALT1	235.96
COLGALT2	9.106
COMMD1	107.591
COMMD10	158.333
COMMD2	173.534
COMMD3	134.765
COMMD4	251.72
COMMD5	108.089
COMMD6	162.093
COMMD7	118.232
COMMD8	76.806
COMMD9	207.206
COMT	280.887
COP1	12.347
COPA	208.558
COPB1	226.334
COPB2	533.517
COPE	913.957
COPG1	348.341
COPG2	88.302
COPS2	426.482
COPS3	303.638
COPS4	741.411
COPS5	450.479
COPS6	107.164
COPS7B	38.124
COPS8	498.855
COQ10B	25.114
COQ2	8.694
COQ3	480.122
COQ4	213.61
COQ5	236.987
COQ6	148.671
COQ7	107.812
COQ8A	237.649
COQ9	450.646
CORO1C	541.175
CORO7	135.568
COTL1	1547.59
COX15	369.591
COX16	248.872
COX18	18.736
COX19	3.158
COX20	636.439
COX4I1	59.528
COX4I2	1226.79
COX5B	4157.11
COX6A1	2634.4
COX6B1	4415.54
COX6C	7303.32
COX7A2L	324.265
CP	89.507
CPAMD8	7.277
CPB2	18.025
CPD	128.205
CPEB1	107.003
CPNE1	2290.67
CPNE3	352.481
CPOX	66.775
CPPED1	106.209
CPQ	332.621
CPSF1	120.39
CPSF2	4.239
CPSF3	86.595
CPSF4	67.396
CPSF7	18.241
CPT1A	290.258
CPT2	1049.84
CPTP	60.197
CPVL	1330.04
CRAT	773.545
CRBN	27.897
CRCP	88.091
CREB3L3	54.317
CREG1	57.07
CRELD1	65.808
CRELD2	249.487
CRIP3	64.745
CRK	147.05
CRKL	18.107
CRLF3	18.144
CRNKL1	113.308
CROT	33.264
CRP	2064.4
CRTAC1	0.84
CRTAP	36.262
CRY1	208.518
CRYBG1	16.415
CRYL1	73.987
CRYZ	158.622
CRYZL1	664.29
CS	112.699
CSDE1	353.766
CSE1L	660.622
CSK	72.237
CSNK1A1	12.694
CSNK2A2	170.526
CSPP1	14.508
CSRP1	7.814
CSRP2	1061.16
CST3	73.128
CSTB	7701.53
CSTF1	51.516
CSTF2	400.448
CSTF3	31.841
CTBP1	74.268
CTBS	4188.83
CTDP1	33.286
CTDSPL2	13.079
CTF1	41.672
CTH	158.184
CTIF	3.3
CTNNA1	129.567
CTNNAL1	6.107
CTNNB1	30.921
CTNNBL1	111.38
CTNND1	40.739
CTPS1	222.391
CTPS2	97.151
CTR9	27.69
CTSA	373.595
CTSB	257.61
CTSC	4502.52
CTSD	6351.55
CTSE	93.638
CTSF	3.46
CTSL	151.55
CTSS	12.407
CTSV	113.509
CTTN	315.186
CTU1	42.97
CTU2	76.674
CUL1	22.63
CUL2	88.697
CUL4A	57.393
CUL4B	44.295
CUL5	93.899
CUL9	76.715
CUTA	234.062
CUTC	128.852
CUX1	5.667
CWC15	116.556
CWC22	39.573
CWC27	99.631
CWF19L1	208.038
CWF19L2	37.035
CXADR	240.233
CXORF38	24.684
CXORF40A	54.187
CXORF56	32.572
CYB5A	1784.33
CYB5D2	62.757
CYB5R3	2994.43
CYB5R4	18.747
CYBC1	71.325
CYFIP1	60.052
CYGB	42.726
CYLD	32.972
CYP11A1	9.709
CYP17A1	130.539
CYP20A1	83.694
CYP26A1	0.575
CYP27C1	93.55
CYP2A13	26.98
CYP2C18	52.86
CYP2C19	619.75
CYP2C8	60.771
CYP2E1	8.082
CYP3A4	14.686
CYP4A11	20.893
CYP4V2	20.129
CYP51A1	132.237
CYP8B1	51.976
CYTH1	35.34
CYTH2	33.777
D2HGDH	414.625
DAAM1	7.236
DAD1	487.927
DAGLB	36.135
DALRD3	32.116
DAO	326.349
DAP	417.355
DAP3	397.835
DAPL1	3213.4
DARS	433.253
DARS2	203.846
DAW1	24.487
DAXX	14.94
DAZAP1	170.774
DAZL	28.246
DBF4B	22.88
DBI	7147.36
DBN1	237.618
DBNL	680.297
DBR1	21.856
DBT	360.592
DCAF1	1.653
DCAF10	15.639
DCAF11	20.444
DCAF8	115.184
DCK	7.933
DCLRE1A	35.757
DCP1A	30.891
DCP1B	16
DCP2	44.925
DCPS	359.132
DCT	84.018
DCTD	493.996
DCTN1	312.994
DCTN2	466.412
DCTN3	593.727
DCTN4	167.449
DCTN6	318.101
DCUN1D1	10.708
DCUN1D2	18.25
DCXR	518.619
DDA1	107.935
DDAH1	491.669
DDB1	485.836
DDHD1	4715.43
DDHD2	18.983
DDI2	68.429
DDO	11.859
DDOST	1693.68
DDRGK1	38.517
DDT	10
DDX1	766.482
DDX10	178.324
DDX11L8	16.164
DDX17	74.547
DDX18	46.847
DDX19B	182.861
DDX20	158.151
DDX21	76.701
DDX23	82.142
DDX24	16.289
DDX25	251.765
DDX27	47.704
DDX28	31.798
DDX31	20.228
DDX39B	38.092
DDX3X	223.338
DDX4	525.286
DDX41	33.668
DDX42	116.846
DDX43	319.999
DDX46	284.785
DDX49	16.453
DDX5	176.884
DDX51	14.741
DDX54	19.417
DDX55	24.277
DDX56	5.865
DDX59	69.136
DDX6	522.677
DECR1	1618.25
DECR2	1187.71
DEK	387.189
DENND1A	8.063
DENND4C	26.72
DENND5B	15.249
DENND6A	32.35
DENR	2792.27
DEPDC1	5.414
DEPDC5	10.028
DEPDC7	18.552
DEPTOR	35.195
DERA	328.927
DERL1	65.949
DES	20.573
DFFA	125.214
DFFB	26.685
DGAT1	23.447
DGCR6	135.656
DGCR8	102.83
DGKE	19.802
DGLUCY	63.656
DGUOK	106.1
DHDH	1000.42
DHFR	3023.86
DHODH	626.612
DHRS11	444.945
DHRS12	990.959
DHRS13	189.695
DHRS4	247.686
DHRS7	233.533
DHRS7B	130.976
DHRSX	21.246
DHTKD1	342.07
DHX15	202.147
DHX16	31.78
DHX29	129.788
DHX30	31.884
DHX34	4.654
DHX35	12.175
DHX36	49.905
DHX37	29.009
DHX38	7.493
DHX57	75.888
DHX8	68.506
DHX9	79.216
DIABLO	348.967
DIAPH1	48.223
DIAPH3	52.888
DICER1	24.959
DIDO1	3.755
DIEXF	9.443
DIMT1	50.517
DIS3	47.484
DIS3L	4.814
DIS3L2	38.928
DKC1	169.894
DLAT	2019.46
DLD	1552.71
DLGAP5	401.025
DLST	1001.74
DMAC1	210.629
DMAC2	117.829
DMAP1	38.976
DMGDH	358.371
DMXL1	2.134
DMXL2	3.016
DNA2	153.021
DNAAF1	4.201
DNAAF2	32.166
DNAAF3	94.223
DNAAF4	1.58
DNAAF5	93.638
DNAH10	10.05
DNAH11	3.756
DNAH2	3.479
DNAH3	2.128
DNAH5	8.202
DNAH9	11.377
DNAI1	7.872
DNAI2	14.339
DNAJA1	471.459
DNAJA2	444.598
DNAJA3	183.047
DNAJB1	292.756
DNAJB11	126.477
DNAJB12	32.098
DNAJB6	17.71
DNAJC1	38.647
DNAJC10	7.294
DNAJC11	77.027
DNAJC13	46.971
DNAJC15	23.247
DNAJC16	14.65
DNAJC19	580.942
DNAJC2	367.355
DNAJC21	56.345
DNAJC24	21.189
DNAJC25	84.415
DNAJC3	190.805
DNAJC5	482.496
DNAJC7	246.414
DNAJC8	102.925
DNAJC9	621.812
DNAL1	130.154
DNASE2	54.062
DND1	21.299
DNLZ	21.59
DNM1L	603.015
DNM2	20.865
DNMT1	181.79
DNPEP	1092.65
DNPH1	414.419
DNTTIP2	53.922
DOCK1	9.763
DOCK5	8.727
DOCK7	2.041
DOHH	210.878
DOK1	14.16
DONSON	26.276
DOPEY1	5.18
DOPEY2	32.043
DPAGT1	46.401
DPCD	608.343
DPF2	10.202
DPH1	68.291
DPH2	67.554
DPH5	66.639
DPH6	57.347
DPH7	69.589
DPM1	45.8
DPP3	965.507
DPP4	705.281
DPP8	44.414
DPP9	80.766
DPPA2	98.505
DPY19L1	10.188
DPYD	107.224
DPYSL3	30.681
DQX1	16.069
DRAP1	17.855
DRC3	11.041
DRG1	392.492
DRG2	682.811
DROSHA	1.18
DSC2	11.894
DSCC1	110.318
DSCR3	45.433
DSG2	2.626
DSP	39.667
DST	0.037
DSTYK	12.171
DTD1	227.288
DTD2	194.357
DTL	13.481
DTNBP1	11.448
DTWD1	15.685
DTWD2	49.361
DTX2	12.862
DTX3	35.712
DTX3L	55.921
DTYMK	856.739
DUS2	15.569
DUS3L	198.495
DUSP11	24.077
DUSP12	64.879
DUSP18	8.175
DUSP19	3.212
DUSP23	110.17
DUT	819.413
DVL2	142.802
DVL3	11.698
DXO	11.504
DYM	76.57
DYNC1H1	356.051
DYNC1I2	507.765
DYNC1LI1	353.809
DYNC1LI2	16.558
DYNC2H1	21.728
DYNC2LI1	33.724
DYNLL1	489.871
DYNLL2	245.53
DYNLRB1	336.974
DYNLT1	217.986
DYNLT3	11.662
E2F8	2.507
EAF2	13.689
EAPP	33.644
EARS2	12.355
EBAG9	34.988
EBNA1BP2	83.089
ECD	266.519
ECE1	692.139
ECH1	2092.41
ECHDC1	14.466
ECHDC2	423.335
ECHDC3	254.463
ECHS1	2070.51
ECI1	1313.3
ECI2	612.193
ECM1	59.895
ECPAS	206.362
ECSIT	123.993
ECT2	55.706
EDC3	50.999
EDC4	220.856
EDEM2	8.134
EDEM3	7.855
EDF1	540.322
EDIL3	18.015
EDRF1	3.024
EEA1	127.74
EED	32.804
EEF1A1	2828.32
EEF1A2	116.202
EEF1AKMT1	51.945
EEF1AKMT2	184.255
EEF1B2	7847.15
EEF1D	2200.72
EEF1E1	66.905
EEF1G	7239.71
EEF2	4362.04
EEF2KMT	56.469
EEFSEC	87.115
EFHD1	116.089
EFL1	96.287
EFR3A	9.094
EFTUD2	5.06
EGFL6	28.598
EGLN1	11.685
EHBP1	6.963
EHD1	197.222
EHD3	61.247
EHD4	21.839
EHHADH	233.511
EHMT1	5.391
EHMT2	8.541
EIF1AD	180.558
EIF2A	1111.55
EIF2AK1	9.326
EIF2AK2	193.284
EIF2AK3	8.695
EIF2AK4	16.163
EIF2B1	522.735
EIF2B2	70.996
EIF2B3	256.971
EIF2B4	275.746
EIF2B5	265.314
EIF2D	511.93
EIF2S1	1769.89
EIF2S2	834.759
EIF2S3	400.729
EIF3A	1147.36
EIF3B	1132.47
EIF3CL	202.22
EIF3D	1369.68
EIF3E	225.362
EIF3F	1560.41
EIF3G	385.128
EIF3H	615.718
EIF3I	823.353
EIF3J	807.098
EIF3L	338.767
EIF3M	396.422
EIF4A1	417.468
EIF4A3	405.112
EIF4B	425.733
EIF4E	1693.46
EIF4E2	88.886
EIF4E3	173.624
EIF4EBP2	1028.15
EIF4ENIF1	314.31
EIF4G1	666.575
EIF4G2	171.768
EIF4G3	42.039
EIF4H	1003.5
EIF5	305.496
EIF5A	3635.96
EIF5B	328.783
EIF6	158.072
ELAC1	19.828
ELAC2	132.331
ELAVL1	287.733
ELAVL2	17.182
ELL	5.484
ELL2	72.014
ELMO1	83.471
ELMOD2	138.463
ELMSAN1	6.511
ELOA	54.172
ELOB	568.984
ELOVL1	2.973
ELOVL5	256.941
ELP1	103.055
ELP2	104.991
ELP3	111.747
ELP4	150.105
ELP5	37.982
ELP6	108.386
EMC1	141.849
EMC2	99.211
EMC3	22.194
EMC4	172.497
EMC7	425.783
EMC8	160.905
EMC9	26.26
EMD	51.565
EME1	52.299
EME2	5.08
EML1	422.96
EML4	356.743
EMSY	2.451
ENAH	154.524
ENDOD1	141.127
ENDOG	6.29
ENDOU	1253.6
ENG	1.917
ENGASE	22.155
ENO1	5619.85
ENO3	38.187
ENOPH1	41.358
ENOSF1	248.054
ENPP1	6.923
ENPP4	43.443
ENPP6	91.782
ENTPD2	22.512
ENTPD6	13.831
ENY2	244.579
EP300	17.785
EP400	9.105
EPB41L2	327.903
EPB41L3	28.936
EPCAM	684.341
EPDR1	23.534
EPG5	7.252
EPHX1	13.434
EPHX2	34.709
EPHX4	38.828
EPN1	146.936
EPPK1	15.084
EPRS	1047.97
EPS15	105.441
EPS15L1	82.879
EPS8	37.35
ERAL1	20.548
ERAP1	41.292
ERC1	13.326
ERCC1	40.96
ERCC2	31.278
ERCC3	14.348
ERCC4	25.174
ERCC5	20.484
ERCC6L	151.424
ERCC8	7.224
ERGIC1	165.445
ERGIC2	14.621
ERGIC3	96.253
ERI1	53.546
ERLEC1	101.556
ERLIN2	1956.35
ERMARD	6.261
ERMP1	232.842
ERO1A	1509.91
ERP29	34.042
ERP44	250.246
ESCO2	4.782
ESD	315.146
ESF1	45.527
ESPL1	42.608
ESRP1	79.793
ESS2	3.606
ETAA1	15.166
ETF1	429.833
ETFA	2525.12
ETFB	3655.12
ETFBKMT	14.504
ETFDH	348.884
ETFRF1	814.557
ETHE1	335.373
EVI5	25.628
EWSR1	216.831
EXD1	13.419
EXD2	128.392
EXO1	9.246
EXOC1	18.215
EXOC2	30.201
EXOC3	53.077
EXOC4	37.017
EXOC6B	27.689
EXOC7	67.401
EXOC8	69.701
EXOG	57.447
EXOSC1	30.852
EXOSC10	64.545
EXOSC2	286.522
EXOSC3	75.888
EXOSC4	208.681
EXOSC5	60.129
EXOSC6	212.85
EXOSC7	144.371
EXOSC8	568.306
EXOSC9	198.055
EXTL2	20.993
EYA3	57.669
EZH2	6.894
F11R	284.442
F13A1	5.187
F8A1	31.191
FAAH	240.194
FAAH2	98.683
FAAP100	33.375
FABP4	12749
FABP7	117.986
FADD	18.374
FAF1	62.841
FAF2	53.727
FAH	40.662
FAHD2A	246.095
FAIM	55.349
FAM104A	120.067
FAM107B	254.899
FAM114A1	383.035
FAM114A2	71.086
FAM118B	2.318
FAM120A	19.018
FAM120C	5.992
FAM129B	23.267
FAM135A	3.465
FAM136A	411.61
FAM13A	29.945
FAM151B	212.55
FAM162A	446.926
FAM172A	4.963
FAM172BP	1.58
FAM177A1	43.224
FAM185A	162.77
FAM192A	109.673
FAM193A	1.716
FAM206A	196.843
FAM207A	34.91
FAM208A	8.314
FAM210A	21.922
FAM213A	314.238
FAM213B	1347.65
FAM234A	61.4
FAM241A	101.691
FAM241B	80.037
FAM32A	52.994
FAM3B	27.838
FAM3C	40.19
FAM49A	150.39
FAM49B	102.356
FAM50A	96.504
FAM83G	0.811
FAM83H	3.169
FAM8A1	9.562
FAM91A1	17.269
FAM98A	654.568
FAN1	16.95
FANCA	16.11
FANCB	16.954
FANCD2	37.637
FANCG	8.576
FANCI	75.363
FANCL	52.025
FANCM	1.515
FARS2	76.362
FARSA	363.823
FARSB	390.439
FASN	18.107
FASTKD1	104.639
FASTKD2	163.536
FASTKD3	48.253
FASTKD5	4.959
FAT1	2.48
FBF1	0.904
FBL	404.463
FBP1	176.171
FBP2	555.434
FBXL12	13.529
FBXL14	22.713
FBXL15	15.908
FBXL17	9.412
FBXL18	10.001
FBXL19	2.832
FBXL4	30.363
FBXO22	9.027
FBXO27	168.615
FBXO3	10.34
FBXO30	23.288
FBXO38	9.188
FBXO42	5.89
FBXO43	5.568
FBXO7	76.755
FBXW5	9.06
FBXW7	151.003
FBXW9	5.828
FCGBP	3504.26
FCHSD1	8.871
FDPS	98.824
FDX1	166.08
FDX2	9.574
FDXR	500.207
FECH	467.096
FEN1	891.891
FERMT2	25.975
FETUB	165.333
FEZ2	22.242
FGD4	4.222
FGFR1OP	108.647
FGFR1OP2	0.94
FGGY	10.061
FH	4851.86
FHDC1	7.986
FHL1	7.789
FHOD1	10.161
FIBP	51.368
FIG4	15.929
FIGLA	17.949
FIGNL1	22.155
FILIP1	2.194
FIP1L1	173.893
FIS1	932.114
FITM2	94.346
FKBP10	701.146
FKBP11	66.248
FKBP14	118.844
FKBP15	88.25
FKBP1A	2085.12
FKBP1B	29.434
FKBP2	1339.57
FKBP3	1221.44
FKBP4	843.821
FKBP6	121.15
FKBP8	364.611
FKBP9	13.825
FKBPL	79.939
FKRP	23.399
FLAD1	199.52
FLII	58.005
FLNA	1323.53
FLNB	324.788
FLOT1	29.302
FLOT2	40.678
FMC1	166.919
FMN2	2.125
FMO1	12.134
FMO5	142.848
FMO6P	5.476
FMR1	78.526
FN1	33.903
FN3KRP	9.986
FNBP1L	38.933
FNBP4	33.011
FNDC3A	4.746
FNTA	472.002
FNTB	479.564
FOCAD	105.802
FOLH1	18.057
FOLR1	44.47
FOPNL	26.405
FOXK2	39.959
FOXRED1	143.804
FPGS	2.973
FPGT	16.419
FRG1	83.579
FRMD8	21.984
FRRS1	320.805
FRYL	2.822
FSCN1	2236.87
FTCD	2459.13
FTH1	9272.2
FTSJ1	22.678
FTSJ3	58.368
FUBP1	543.594
FUBP3	173.862
FUCA1	471.229
FUCA2	12.405
FUK	12.249
FUNDC1	16.9
FURIN	39.172
FUS	149.953
FXN	252.338
FXR1	159.124
G3BP1	557.365
G3BP2	267.464
G6PD	1456.24
GAA	518.751
GAB1	15.833
GABPA	76.774
GABPB2	19.621
GAD1	41.189
GADD45GIP1	238.591
GAK	49.124
GALC	350.474
GALE	522.759
GALK1	155.156
GALK2	208.602
GALM	265.555
GALNS	76.271
GALNT2	90.444
GALNT4	7.403
GALNT7	44.344
GALT	342.412
GAMT	4188.67
GAN	10.236
GANAB	1128.48
GAPDH	26460.3
GAPVD1	55.321
GAR1	107.555
GARS	755.796
GART	1755.48
GAS7	38.049
GAS8	12.695
GATAD2A	169.784
GATB	25.003
GATC	36.675
GATD1	73.894
GATD3A	2116.28
GBA	253.184
GBA2	3.871
GBA3	27.761
GBE1	686.429
GBF1	18.336
GBP1	1068.57
GCA	1863.11
GCAT	196.372
GCC1	20.51
GCC2	13.984
GCDH	572.971
GCFC2	33.714
GCHFR	55.147
GCLC	113.733
GCLM	239.475
GCN1	406.615
GCNA	63.182
GCNT1	8.295
GCSH	42.497
GDAP2	36.08
GDE1	57.924
GDI1	157.644
GDI2	1503.99
GDPD2	45.233
GDPD5	39.647
GDPGP1	6.585
GEMIN2	133.257
GEMIN4	118.78
GEMIN5	359.443
GEMIN6	179.826
GEMIN7	131.93
GEN1	2.271
GFER	162.144
GFM1	160.759
GFM2	62.786
GFOD2	6.413
GFPT1	234.854
GFY	488.966
GGA1	160.109
GGA3	17.51
GGCX	17.088
GGH	62.162
GGPS1	196.609
GGT7	162.267
GHDC	7.307
GHITM	141.105
GID8	34.561
GIGYF2	54.269
GINS1	294.45
GINS2	249.926
GINS4	424.501
GIPC1	33.567
GIT1	19.085
GIT2	44.548
GJA4	7.592
GJC1	9.865
GK	47.105
GK5	9.86
GKAP1	258.653
GLA	186.453
GLB1	449.187
GLCCI1	9.357
GLCE	3.135
GLDC	179.7
GLE1	57.317
GLG1	62.298
GLIPR2	24.712
GLMN	288.793
GLMP	129.713
GLO1	4421.19
GLOD4	591.017
GLOD5	1635.83
GLRX	1399.26
GLRX2	131.518
GLRX3	1940.44
GLRX5	1010.67
GLS	40.096
GLT1D1	2.129
GLT8D1	50.338
GLTP	236.736
GLUD1	511.249
GLUL	80.752
GMCL1	4.044
GMDS	1125.07
GMEB1	93.633
GMFB	1054.78
GMNN	56.93
GMPPA	19.375
GMPPB	184.548
GMPS	512.238
GNAI3	177.455
GNAO1	61.805
GNAS	14.817
GNB1	67.992
GNB1L	18.755
GNG2	64.276
GNG7	29.214
GNL1	465.673
GNL2	35.83
GNL3	71.9
GNL3L	42.951
GNMT	18.502
GNPAT	263.667
GNPDA1	1205.87
GNPDA2	676.05
GNPNAT1	47.532
GNPTAB	3.931
GNPTG	29.652
GNS	11.808
GOLGA1	10.114
GOLGA2	27.81
GOLGA3	27.056
GOLGA4	43.757
GOLGA5	30.558
GOLGB1	40.972
GOLIM4	4.105
GOLM1	27.366
GOLPH3L	55.752
GON7	238.387
GOPC	13.913
GORASP1	56.917
GOSR2	31.478
GOT1	3602.75
GOT2	5422.09
GPA33	163.226
GPAA1	265.528
GPALPP1	120.49
GPATCH1	23.327
GPATCH11	47.15
GPATCH8	19.985
GPBP1L1	13.547
GPCPD1	7.576
GPD1	938.38
GPD1L	192.136
GPD2	73.551
GPHN	44.631
GPI	7900.27
GPKOW	92.433
GPM6B	387.419
GPN1	3.41
[truncated: 3,873 more rows]
