# Supplementary material for: Decoding protein phosphorylation during oocyte meiotic divisions using phosphoproteomics
Source: eLife. 2025 Jul 17;13:RP104255. doi: 10.7554/eLife.104255 (PMC12270485; doi:10.7554/eLife.104255)
Supplement: Supplementary file 2. [file elife-104255-supp2.xlsx]

## Sheet: raw
Protein_Reference	genename	0	2	3	4	5	6	7	8	9	Chan_10	Chan_11	average levels	MII/PRO	Log2 FC(MII/PRO)
gnl|gene16313|XL-9_2-gene16313|rna47641|	42sp50.L	0.216	0.086	0.127	0.081	0.07	0.069	0.072	0.07	0.076	0.064	0.069	0.0963333	0.337963	-1.56506
gnl|gene50021|XL-9_2-gene50021|rna96284|	a2m.S	0.099	0.094	0.096	0.098	0.101	0.092	0.09	0.084	0.088	0.074	0.083	0.0935556	0.868687	-0.203092
gnl|gene43170|XL-9_2-gene43170|rna86438|	a2ml1.L	0.093	0.087	0.092	0.091	0.095	0.09	0.09	0.086	0.086	0.094	0.095	0.09	0.924731	-0.112894
gnl|gene14659|XL-9_2-gene14659|rna42724|	aaas.L	0.097	0.09	0.086	0.087	0.092	0.089	0.097	0.1	0.101	0.078	0.083	0.0932222	1.03608	0.0511388
gnl|gene42228|XL-9_2-gene42228|rna85017|	aadac.L	0.157	0.09	0.12	0.082	0.059	0.064	0.071	0.066	0.077	0.095	0.118	0.0873333	0.455414	-1.13475
gnl|gene5773|XL-9_2-gene5773|rna16886|	aadacl4.S	0.089	0.091	0.11	0.092	0.095	0.078	0.087	0.089	0.102	0.086	0.08	0.0925556	1.07303	0.101695
gnl|gene17129|XL-9_2-gene17129|rna50024|	aadat.S	0.083	0.088	0.092	0.104	0.101	0.099	0.091	0.093	0.088	0.082	0.08	0.0932222	1.09036	0.124806
gnl|gene1693|XL-9_2-gene1693|rna4935|	aagab.L	0.092	0.104	0.102	0.112	0.082	0.095	0.072	0.054	0.09	0.104	0.093	0.0892222	0.782609	-0.353637
gnl|gene4997|XL-9_2-gene4997|rna14603|	aak1.S	0.076	0.072	0.09	0.091	0.102	0.095	0.102	0.11	0.103	0.087	0.073	0.0934444	1.40132	0.486782
gnl|gene11187|XL-9_2-gene11187|rna32509|	aamdc.S	0.118	0.103	0.105	0.094	0.088	0.099	0.076	0.085	0.082	0.083	0.068	0.0944444	0.707627	-0.498939
gnl|gene3807|XL-9_2-gene3807|rna11094|	aamp.L	0.098	0.099	0.099	0.098	0.095	0.097	0.086	0.093	0.089	0.076	0.07	0.0948889	0.928571	-0.106915
gnl|gene8875|XL-9_2-gene8875|rna25835|	aamp.S	0.112	0.102	0.107	0.095	0.092	0.093	0.086	0.085	0.086	0.072	0.069	0.0953333	0.763393	-0.389502
gnl|gene16361|XL-9_2-gene16361|rna47786|	aar2.L	0.082	0.086	0.082	0.087	0.089	0.09	0.092	0.101	0.093	0.098	0.099	0.0891111	1.18293	0.242361
gnl|gene5928|XL-9_2-gene5928|rna17353|	aars1.L	0.083	0.085	0.083	0.083	0.08	0.077	0.101	0.099	0.106	0.099	0.104	0.0885556	1.23494	0.304441
gnl|gene739|XL-9_2-gene739|rna2153|	aars2.L	0.087	0.086	0.092	0.086	0.097	0.096	0.095	0.09	0.091	0.09	0.09	0.0911111	1.04023	0.0569024
gnl|gene5048|XL-9_2-gene5048|rna14755|	aarsd1.L	0.095	0.093	0.091	0.087	0.092	0.095	0.095	0.097	0.09	0.083	0.081	0.0927778	0.984211	-0.0229611
gnl|gene6246|XL-9_2-gene6246|rna18266|	aasdh.L	0.052	0.061	0.06	0.062	0.065	0.061	0.056	0.055	0.094	0.269	0.165	0.0628889	1.43269	0.518729
gnl|gene41776|XL-9_2-gene41776|rna84338|	aass.L	0.092	0.091	0.094	0.09	0.093	0.092	0.094	0.093	0.089	0.085	0.085	0.092	0.98913	-0.0157673
gnl|gene9782|XL-9_2-gene9782|rna28444|	aatf.S	0.076	0.083	0.077	0.094	0.103	0.105	0.098	0.101	0.107	0.092	0.063	0.0937778	1.36842	0.452512
gnl|gene43390|XL-9_2-gene43390|rna86771|	abat.L	0.085	0.083	0.083	0.075	0.078	0.081	0.095	0.096	0.093	0.113	0.117	0.0854444	1.11176	0.152851
gnl|gene9728|XL-9_2-gene9728|rna28294|	abat.S	0.095	0.102	0.096	0.095	0.093	0.096	0.087	0.091	0.084	0.082	0.08	0.0932222	0.921053	-0.118644
gnl|gene9616|XL-9_2-gene9616|rna27973|	abca3.S	0.1	0.118	0.094	0.116	0.106	0.109	0.07	0.069	0.063	0.08	0.075	0.0938889	0.66	-0.599462
gnl|gene6817|XL-9_2-gene6817|rna19942|	abca8.L	0.139	0.106	0.083	0.093	0.073	0.078	0.086	0.079	0.085	0.074	0.103	0.0913333	0.589928	-0.761389
gnl|gene11161|XL-9_2-gene11161|rna32439|	abcb6.L	0.089	0.089	0.088	0.09	0.094	0.092	0.095	0.1	0.097	0.08	0.087	0.0926667	1.10674	0.146318
gnl|gene4927|XL-9_2-gene4927|rna14383|	abcb7.L	0.096	0.096	0.105	0.099	0.098	0.098	0.088	0.091	0.087	0.073	0.069	0.0953333	0.927083	-0.109229
gnl|gene1861|XL-9_2-gene1861|rna5435|	abcb8.L	0.094	0.098	0.095	0.115	0.091	0.106	0.082	0.093	0.076	0.078	0.072	0.0944444	0.898936	-0.153709
gnl|gene20417|XL-9_2-gene20417|rna59639|	abcc1.L	0.088	0.089	0.089	0.093	0.092	0.095	0.096	0.099	0.086	0.083	0.09	0.0918889	1.05114	0.0719498
gnl|gene14261|XL-9_2-gene14261|rna41555|	abcc10.L	0.097	0.095	0.089	0.093	0.091	0.1	0.09	0.087	0.089	0.09	0.078	0.0923333	0.907216	-0.140481
gnl|gene8577|XL-9_2-gene8577|rna24958|	abcc4.L	0.255	0.076	0.225	0.127	0.041	0.042	0.026	0.026	0.025	0.023	0.135	0.0936667	0.1	-3.32193
gnl|gene39766|XL-9_2-gene39766|rna81490|	abcd1.S	0.097	0.101	0.089	0.094	0.093	0.092	0.09	0.096	0.084	0.081	0.084	0.0928889	0.927835	-0.10806
gnl|gene4614|XL-9_2-gene4614|rna13456|	abcd3.S	0.091	0.095	0.096	0.091	0.098	0.098	0.093	0.094	0.089	0.074	0.081	0.0938889	1.00549	0.0079052
gnl|gene1725|XL-9_2-gene1725|rna5021|	abce1.L	0.089	0.082	0.082	0.087	0.08	0.083	0.084	0.082	0.071	0.132	0.127	0.0822222	0.859551	-0.218346
gnl|gene19372|XL-9_2-gene19372|rna56615|	abce1.S	0.099	0.1	0.095	0.096	0.096	0.094	0.089	0.088	0.082	0.078	0.083	0.0932222	0.858586	-0.219966
gnl|gene10093|XL-9_2-gene10093|rna29341|	abcf1.L	0.083	0.094	0.088	0.092	0.085	0.09	0.089	0.091	0.092	0.1	0.095	0.0893333	1.10241	0.14066
gnl|gene6381|XL-9_2-gene6381|rna18678|	abcf2.L	0.094	0.091	0.097	0.095	0.096	0.094	0.092	0.092	0.09	0.078	0.081	0.0934444	0.968085	-0.0467942
gnl|gene5949|XL-9_2-gene5949|rna17412|	abcf3.L	0.085	0.076	0.077	0.083	0.094	0.086	0.1	0.091	0.089	0.109	0.111	0.0867778	1.05882	0.0824622
gnl|gene6363|XL-9_2-gene6363|rna18625|	abcf3.S	0.093	0.103	0.1	0.098	0.091	0.105	0.083	0.086	0.079	0.083	0.08	0.0931111	0.887097	-0.172837
gnl|gene886|XL-9_2-gene886|rna2599|	abhd10.L	0.102	0.104	0.1	0.098	0.106	0.094	0.083	0.08	0.085	0.068	0.079	0.0946667	0.808824	-0.306103
gnl|gene8438|XL-9_2-gene8438|rna24560|	abhd11.L	0.112	0.109	0.111	0.103	0.113	0.115	0.073	0.074	0.071	0.056	0.064	0.0978889	0.647321	-0.627446
gnl|gene11225|XL-9_2-gene11225|rna32649|	abhd14a.L	0.099	0.096	0.099	0.088	0.092	0.095	0.091	0.094	0.082	0.079	0.086	0.0928889	0.888889	-0.169925
gnl|gene6601|XL-9_2-gene6601|rna19317|	abhd14b.L	0.066	0.072	0.075	0.06	0.064	0.057	0.115	0.124	0.119	0.123	0.125	0.0835556	1.84091	0.880418
gnl|gene285|XL-9_2-gene285|rna817|	abhd16a.L	0.085	0.102	0.084	0.088	0.091	0.099	0.092	0.087	0.093	0.084	0.094	0.0912222	1.05882	0.0824622
gnl|gene13187|XL-9_2-gene13187|rna38363|	abhd16a.S	0.079	0.084	0.075	0.086	0.091	0.085	0.104	0.107	0.105	0.089	0.094	0.0906667	1.34177	0.42414
gnl|gene11563|XL-9_2-gene11563|rna33581|	abhd17b.L	0.099	0.094	0.105	0.075	0.087	0.084	0.095	0.096	0.098	0.085	0.083	0.0925556	0.979798	-0.0294438
gnl|gene14886|XL-9_2-gene14886|rna43449|	abhd18.L	0.089	0.073	0.102	0.096	0.103	0.097	0.098	0.098	0.091	0.073	0.08	0.0941111	1.0618	0.086509
gnl|gene20104|XL-9_2-gene20104|rna58665|	abhd5.L	0.077	0.102	0.077	0.086	0.094	0.093	0.077	0.075	0.08	0.124	0.116	0.0845556	1.00649	0.00933786
gnl|gene5840|XL-9_2-gene5840|rna17100|	abi2.L	0.097	0.086	0.08	0.088	0.091	0.101	0.092	0.084	0.092	0.099	0.089	0.0901111	0.907216	-0.140481
gnl|gene39808|XL-9_2-gene39808|rna81550|	abi2.S	0.086	0.082	0.084	0.092	0.092	0.093	0.088	0.087	0.087	0.102	0.107	0.0878889	1.01163	0.0166787
gnl|gene11993|XL-9_2-gene11993|rna34852|	abitram.S	0.092	0.09	0.091	0.088	0.083	0.099	0.1	0.094	0.082	0.092	0.088	0.091	0.956522	-0.0641303
gnl|gene1453|XL-9_2-gene1453|rna4231|	abr.L	0.08	0.085	0.091	0.118	0.105	0.099	0.083	0.079	0.083	0.089	0.089	0.0914444	1.0125	0.0179219
gnl|gene15331|XL-9_2-gene15331|rna44744|	abracl.L	0.097	0.09	0.096	0.089	0.099	0.094	0.111	0.091	0.086	0.063	0.084	0.0947778	0.912371	-0.132307
gnl|gene17131|XL-9_2-gene17131|rna50033|	abraxas1.S	0.071	0.073	0.078	0.071	0.069	0.079	0.113	0.11	0.114	0.111	0.11	0.0864444	1.57746	0.657608
gnl|gene13414|XL-9_2-gene13414|rna39024|	abraxas2.L	0.093	0.094	0.093	0.077	0.087	0.103	0.087	0.086	0.098	0.093	0.089	0.0908889	0.989247	-0.0155969
gnl|gene4285|XL-9_2-gene4285|rna12480|	acaa1.L	0.085	0.086	0.086	0.084	0.09	0.089	0.098	0.101	0.099	0.093	0.089	0.0908889	1.17647	0.234465
gnl|gene20396|XL-9_2-gene20396|rna59579|	acaa2.L	0.09	0.096	0.09	0.094	0.09	0.096	0.09	0.09	0.093	0.086	0.085	0.0921111	1.01667	0.0238467
gnl|gene49629|XL-9_2-gene49629|rna95694|	acaa2.S	0.092	0.078	0.093	0.085	0.086	0.09	0.093	0.092	0.081	0.11	0.102	0.0877778	0.940217	-0.0889337
gnl|gene37147|XL-9_2-gene37147|rna77771|	acaca.L	0.114	0.073	0.075	0.115	0.11	0.102	0.091	0.087	0.085	0.074	0.074	0.0946667	0.754386	-0.406625
gnl|gene8281|XL-9_2-gene8281|rna24111|	acacb.L	0.096	0.093	0.097	0.09	0.099	0.104	0.086	0.086	0.092	0.076	0.08	0.0936667	0.927083	-0.109229
gnl|gene47694|XL-9_2-gene47694|rna92930|	acad10.L	0.089	0.087	0.089	0.087	0.097	0.092	0.092	0.09	0.092	0.091	0.096	0.0905556	1.02247	0.0320612
gnl|gene5340|XL-9_2-gene5340|rna15636|	acad11.L	0.085	0.086	0.087	0.093	0.088	0.099	0.093	0.108	0.093	0.091	0.078	0.0924444	1.18235	0.241661
gnl|gene3537|XL-9_2-gene3537|rna10295|	acad8.L	0.096	0.099	0.085	0.088	0.094	0.093	0.093	0.099	0.089	0.084	0.081	0.0928889	0.979167	-0.0303736
gnl|gene48840|XL-9_2-gene48840|rna94599|	acad9.S	0.092	0.105	0.091	0.094	0.086	0.091	0.09	0.093	0.091	0.086	0.081	0.0925556	1	0
gnl|gene17402|XL-9_2-gene17402|rna50813|	acadl.L	0.093	0.095	0.093	0.09	0.091	0.092	0.089	0.091	0.087	0.09	0.09	0.0912222	0.956989	-0.0634254
gnl|gene8983|XL-9_2-gene8983|rna26158|	acadm.L	0.086	0.092	0.096	0.088	0.087	0.089	0.091	0.091	0.091	0.093	0.095	0.0901111	1.05814	0.0815299
gnl|gene5405|XL-9_2-gene5405|rna15851|	acadm.S	0.087	0.078	0.09	0.084	0.102	0.093	0.096	0.087	0.102	0.072	0.107	0.091	1.08621	0.119299
gnl|gene8153|XL-9_2-gene8153|rna23734|	acads.L	0.095	0.094	0.09	0.096	0.097	0.094	0.093	0.088	0.089	0.081	0.083	0.0928889	0.931579	-0.10225
gnl|gene9867|XL-9_2-gene9867|rna28681|	acadsb.L	0.092	0.097	0.097	0.092	0.096	0.094	0.091	0.09	0.09	0.082	0.082	0.0932222	0.978261	-0.0317089
gnl|gene16476|XL-9_2-gene16476|rna48141|	acadvl.L	0.099	0.102	0.09	0.085	0.086	0.085	0.093	0.098	0.085	0.088	0.089	0.0914444	0.924242	-0.113657
gnl|gene41514|XL-9_2-gene41514|rna83986|	acap2.L	0.082	0.077	0.098	0.076	0.1	0.093	0.104	0.075	0.103	0.108	0.084	0.0897778	1.08537	0.118181
gnl|gene9051|XL-9_2-gene9051|rna26339|	acat1.L	0.091	0.097	0.093	0.096	0.092	0.094	0.088	0.09	0.09	0.085	0.083	0.0923333	0.989011	-0.0159415
gnl|gene10303|XL-9_2-gene10303|rna29942|	acat1.S	0.111	0.109	0.108	0.094	0.097	0.096	0.074	0.079	0.082	0.075	0.076	0.0944444	0.725225	-0.463499
gnl|gene10680|XL-9_2-gene10680|rna31029|	acat2.L	0.095	0.102	0.099	0.088	0.09	0.093	0.086	0.092	0.088	0.084	0.084	0.0925556	0.947368	-0.0780025
gnl|gene15034|XL-9_2-gene15034|rna43867|	acat2.S	0.07	0.074	0.078	0.068	0.067	0.07	0.1	0.109	0.104	0.136	0.125	0.0822222	1.52143	0.605427
gnl|gene15895|XL-9_2-gene15895|rna46455|	acbd3.L	0.085	0.103	0.072	0.098	0.082	0.081	0.096	0.104	0.098	0.087	0.094	0.091	1.18824	0.248821
gnl|gene11078|XL-9_2-gene11078|rna32205|	acbd3.S	0.088	0.097	0.083	0.083	0.092	0.09	0.098	0.095	0.094	0.087	0.093	0.0911111	1.07386	0.102811
gnl|gene2011|XL-9_2-gene2011|rna5846|	acbd5.L	0.083	0.091	0.092	0.086	0.09	0.094	0.096	0.1	0.097	0.093	0.078	0.0921111	1.18675	0.247012
gnl|gene11345|XL-9_2-gene11345|rna32983|	acbd6.S	0.091	0.085	0.088	0.1	0.105	0.098	0.082	0.084	0.098	0.081	0.088	0.0923333	1	0
gnl|gene2362|XL-9_2-gene2362|rna6874|	acin1.L	0.073	0.063	0.065	0.072	0.081	0.092	0.1	0.106	0.106	0.127	0.114	0.0842222	1.45205	0.538096
gnl|gene4592|XL-9_2-gene4592|rna13396|	acly.L	0.099	0.1	0.097	0.084	0.086	0.087	0.094	0.094	0.09	0.088	0.083	0.0923333	0.929293	-0.105795
gnl|gene13375|XL-9_2-gene13375|rna38904|	acly.S	0.091	0.087	0.09	0.088	0.092	0.089	0.097	0.096	0.093	0.09	0.088	0.0914444	1.03846	0.0544478
gnl|gene13109|XL-9_2-gene13109|rna38105|	aco1.L	0.094	0.085	0.092	0.088	0.092	0.085	0.095	0.089	0.09	0.093	0.097	0.09	0.952128	-0.0707731
gnl|gene9191|XL-9_2-gene9191|rna26702|	aco2.L	0.086	0.092	0.091	0.09	0.095	0.096	0.093	0.093	0.091	0.087	0.086	0.0918889	1.06977	0.0972972
gnl|gene5999|XL-9_2-gene5999|rna17549|	aco2.S	0.083	0.088	0.087	0.085	0.083	0.084	0.097	0.094	0.103	0.097	0.098	0.0893333	1.18675	0.247012
gnl|gene9730|XL-9_2-gene9730|rna28300|	acot12.L	0.106	0.097	0.108	0.095	0.099	0.097	0.1	0.08	0.08	0.065	0.073	0.0957778	0.754717	-0.405992
gnl|gene16725|XL-9_2-gene16725|rna48875|	acot13.S	0.061	0.056	0.051	0.051	0.06	0.048	0.121	0.118	0.112	0.162	0.161	0.0753333	1.88525	0.914753
gnl|gene17707|XL-9_2-gene17707|rna51749|	acot7.L	0.091	0.092	0.096	0.088	0.092	0.094	0.094	0.09	0.091	0.088	0.084	0.092	0.994505	-0.00794875
gnl|gene7950|XL-9_2-gene7950|rna23184|	acot8.S	0.082	0.085	0.08	0.074	0.093	0.114	0.101	0.109	0.086	0.095	0.081	0.0915556	1.18902	0.249778
gnl|gene41668|XL-9_2-gene41668|rna84179|	acot9.S	0.068	0.075	0.073	0.067	0.073	0.067	0.104	0.106	0.105	0.125	0.136	0.082	1.55147	0.633636
gnl|gene19413|XL-9_2-gene19413|rna56738|	acox1.L	0.099	0.098	0.101	0.087	0.088	0.084	0.09	0.087	0.085	0.088	0.093	0.091	0.868687	-0.203092
gnl|gene43504|XL-9_2-gene43504|rna86940|	acox2.L	0.088	0.089	0.091	0.088	0.089	0.09	0.085	0.084	0.085	0.107	0.104	0.0876667	0.960227	-0.0585522
gnl|gene20256|XL-9_2-gene20256|rna59138|	acox3.L	0.09	0.096	0.099	0.095	0.097	0.095	0.097	0.096	0.087	0.073	0.076	0.0946667	1.01667	0.0238467
gnl|gene13841|XL-9_2-gene13841|rna40303|	acp1.L	0.091	0.114	0.08	0.098	0.082	0.072	0.071	0.066	0.085	0.126	0.115	0.0843333	0.82967	-0.26939
gnl|gene3974|XL-9_2-gene3974|rna11561|	acp1.S	0.098	0.087	0.098	0.106	0.088	0.091	0.096	0.097	0.088	0.074	0.076	0.0943333	0.943878	-0.0833284
gnl|gene17751|XL-9_2-gene17751|rna51892|	acp6.S	0.087	0.089	0.092	0.093	0.093	0.095	0.098	0.093	0.097	0.081	0.081	0.093	1.09195	0.126912
gnl|gene48757|XL-9_2-gene48757|rna94493|	acsbg2.L	0.08	0.082	0.081	0.087	0.091	0.087	0.096	0.094	0.095	0.099	0.108	0.0881111	1.18125	0.240314
gnl|gene1900|XL-9_2-gene1900|rna5540|	acsf2.L	0.106	0.086	0.12	0.091	0.074	0.087	0.079	0.081	0.103	0.058	0.116	0.0918889	0.867925	-0.204358
gnl|gene14064|XL-9_2-gene14064|rna40967|	acsf3.S	0.094	0.086	0.074	0.089	0.094	0.102	0.094	0.085	0.102	0.097	0.082	0.0911111	0.994681	-0.00769439
gnl|gene17415|XL-9_2-gene17415|rna50854|	acsl1.L	0.091	0.094	0.09	0.093	0.097	0.097	0.089	0.085	0.085	0.088	0.09	0.0912222	0.934066	-0.0984037
gnl|gene2183|XL-9_2-gene2183|rna6344|	acsl1.S	0.089	0.101	0.09	0.092	0.085	0.099	0.094	0.098	0.084	0.088	0.079	0.0924444	1.02247	0.0320612
gnl|gene70|XL-9_2-gene70|rna198|	acsl3.L	0.08	0.083	0.085	0.087	0.094	0.096	0.098	0.103	0.098	0.092	0.085	0.0915556	1.25625	0.329124
gnl|gene17661|XL-9_2-gene17661|rna51624|	acsl4.L	0.089	0.095	0.093	0.089	0.089	0.096	0.091	0.093	0.09	0.09	0.086	0.0916667	1.02809	0.0399664
gnl|gene18528|XL-9_2-gene18528|rna54109|	acsl4.S	0.074	0.081	0.077	0.079	0.088	0.083	0.094	0.1	0.089	0.117	0.117	0.085	1.27703	0.352789
gnl|gene5935|XL-9_2-gene5935|rna17373|	acsm3.L	0.169	0.091	0.133	0.109	0.08	0.07	0.058	0.063	0.069	0.065	0.093	0.0935556	0.390533	-1.35649
gnl|gene45664|XL-9_2-gene45664|rna90155|	acss2.1.L	0.087	0.085	0.09	0.087	0.099	0.095	0.092	0.082	0.096	0.094	0.092	0.0903333	1.02299	0.0327899
gnl|gene5750|XL-9_2-gene5750|rna16826|	acss3.L	0.093	0.09	0.093	0.094	0.103	0.098	0.091	0.083	0.092	0.083	0.079	0.093	0.94086	-0.0879477
gnl|gene19900|XL-9_2-gene19900|rna58110|	acta4.S	0.089	0.101	0.086	0.099	0.09	0.09	0.085	0.081	0.089	0.092	0.096	0.09	0.955056	-0.0663425
gnl|gene5277|XL-9_2-gene5277|rna15445|	actg1.S	0.089	0.09	0.089	0.084	0.089	0.091	0.097	0.096	0.094	0.091	0.09	0.091	1.06742	0.0941222
gnl|gene7284|XL-9_2-gene7284|rna21258|	actn1.L	0.095	0.087	0.092	0.087	0.084	0.079	0.086	0.089	0.084	0.106	0.11	0.087	0.910526	-0.135227
gnl|gene13179|XL-9_2-gene13179|rna38330|	actn1.S	0.097	0.094	0.09	0.089	0.096	0.092	0.09	0.086	0.089	0.085	0.092	0.0914444	0.902062	-0.148702
gnl|gene14393|XL-9_2-gene14393|rna41912|	actn4.L	0.102	0.105	0.094	0.094	0.092	0.089	0.088	0.086	0.083	0.086	0.081	0.0925556	0.828431	-0.271546
gnl|gene11677|XL-9_2-gene11677|rna33938|	actn4.S	0.086	0.082	0.086	0.088	0.086	0.086	0.091	0.091	0.086	0.11	0.108	0.0868889	1.02907	0.0413408
gnl|gene19384|XL-9_2-gene19384|rna56646|	actr10.L	0.085	0.092	0.099	0.094	0.098	0.098	0.096	0.086	0.088	0.086	0.078	0.0928889	1.02353	0.0335526
gnl|gene5371|XL-9_2-gene5371|rna15744|	actr10.S	0.053	0.055	0.054	0.051	0.061	0.062	0.108	0.109	0.091	0.177	0.179	0.0715556	1.88679	0.915936
gnl|gene18483|XL-9_2-gene18483|rna53968|	actr1a.S	0.092	0.088	0.1	0.084	0.087	0.082	0.1	0.096	0.094	0.084	0.092	0.0914444	1.03261	0.0462937
gnl|gene17277|XL-9_2-gene17277|rna50418|	actr2.L	0.091	0.093	0.092	0.087	0.094	0.089	0.092	0.095	0.093	0.084	0.09	0.0917778	1.03297	0.0467942
gnl|gene15606|XL-9_2-gene15606|rna45570|	actr3.L	0.091	0.087	0.087	0.086	0.095	0.095	0.097	0.095	0.097	0.084	0.087	0.0922222	1.05495	0.0771679
gnl|gene10245|XL-9_2-gene10245|rna29792|	actr3.S	0.09	0.098	0.084	0.084	0.089	0.089	0.096	0.103	0.097	0.082	0.087	0.0922222	1.11111	0.152003
gnl|gene241|XL-9_2-gene241|rna679|	actr5.S	0.077	0.078	0.072	0.069	0.076	0.085	0.11	0.103	0.09	0.127	0.114	0.0844444	1.25325	0.32567
gnl|gene16852|XL-9_2-gene16852|rna49244|	actr6.L	0.065	0.075	0.076	0.086	0.088	0.103	0.1	0.085	0.092	0.118	0.111	0.0855556	1.36154	0.445238
gnl|gene8847|XL-9_2-gene8847|rna25770|	actr8.S	0.086	0.088	0.113	0.087	0.102	0.106	0.089	0.086	0.091	0.075	0.077	0.0942222	1.02907	0.0413408
gnl|gene35625|XL-9_2-gene35625|rna75667|	acvr1.L	0.097	0.095	0.08	0.085	0.113	0.096	0.081	0.083	0.095	0.1	0.074	0.0916667	0.917526	-0.124179
gnl|gene40107|XL-9_2-gene40107|rna81962|	acy1.1.S	0.157	0.089	0.136	0.113	0.08	0.09	0.063	0.07	0.065	0.053	0.085	0.0958889	0.429936	-1.21781
gnl|gene17243|XL-9_2-gene17243|rna50336|	acyp1.S	0.09	0.076	0.081	0.1	0.112	0.1	0.081	0.077	0.096	0.091	0.095	0.0903333	0.961111	-0.0572249
gnl|gene46750|XL-9_2-gene46750|rna91645|	ada.L	0.274	0.074	0.213	0.142	0.044	0.042	0.022	0.028	0.032	0.027	0.102	0.0967778	0.109489	-3.19114
gnl|gene3783|XL-9_2-gene3783|rna11010|	adad1.L	0.119	0.085	0.08	0.094	0.098	0.096	0.089	0.08	0.091	0.082	0.087	0.0924444	0.718487	-0.476965
gnl|gene48516|XL-9_2-gene48516|rna94117|	adam10.S	0.074	0.079	0.09	0.086	0.095	0.092	0.086	0.081	0.08	0.132	0.105	0.0847778	1.08784	0.121464
gnl|gene18141|XL-9_2-gene18141|rna53003|	adam17.S	0.106	0.086	0.086	0.085	0.098	0.095	0.106	0.095	0.088	0.082	0.073	0.0938889	0.863208	-0.212221
gnl|gene18898|XL-9_2-gene18898|rna55158|	adam9.S	0.099	0.086	0.097	0.115	0.099	0.103	0.088	0.094	0.087	0.07	0.063	0.0964444	0.914141	-0.129511
gnl|gene3351|XL-9_2-gene3351|rna9739|	adap1.S	0.095	0.094	0.091	0.099	0.096	0.099	0.093	0.085	0.088	0.087	0.074	0.0933333	0.910526	-0.135227
gnl|gene41964|XL-9_2-gene41964|rna84655|	adar.S	0.089	0.089	0.095	0.095	0.097	0.107	0.086	0.09	0.093	0.086	0.074	0.0934444	1.02809	0.0399664
gnl|gene49947|XL-9_2-gene49947|rna96171|	adar-a	0.077	0.084	0.083	0.086	0.092	0.1	0.096	0.092	0.092	0.1	0.099	0.0891111	1.19481	0.256775
gnl|gene34977|XL-9_2-gene34977|rna74720|	adck2.S	0.092	0.09	0.082	0.091	0.1	0.102	0.099	0.097	0.085	0.083	0.08	0.0931111	0.98913	-0.0157673
gnl|gene6346|XL-9_2-gene6346|rna18570|	add1.L	0.106	0.079	0.099	0.09	0.07	0.078	0.083	0.097	0.076	0.108	0.114	0.0864444	0.816038	-0.293292
gnl|gene15501|XL-9_2-gene15501|rna45256|	add3.S	0.128	0.104	0.118	0.092	0.094	0.072	0.086	0.072	0.078	0.06	0.096	0.0937778	0.585938	-0.771181
gnl|gene10944|XL-9_2-gene10944|rna31809|	adgrl2.L	0.085	0.082	0.088	0.081	0.089	0.094	0.098	0.105	0.1	0.088	0.09	0.0913333	1.20588	0.270089
gnl|gene3283|XL-9_2-gene3283|rna9511|	adh5.L	0.089	0.1	0.093	0.107	0.094	0.103	0.085	0.099	0.083	0.078	0.07	0.0947778	1.02247	0.0320612
gnl|gene11804|XL-9_2-gene11804|rna34274|	adh5.S	0.125	0.084	0.113	0.106	0.108	0.098	0.085	0.078	0.081	0.058	0.064	0.0975556	0.636	-0.652901
gnl|gene1905|XL-9_2-gene1905|rna5552|	adh6.L	0.085	0.085	0.085	0.083	0.083	0.081	0.091	0.099	0.097	0.108	0.103	0.0876667	1.15294	0.205319
gnl|gene20036|XL-9_2-gene20036|rna58471|	adi1.L	0.096	0.088	0.1	0.098	0.094	0.091	0.088	0.076	0.08	0.087	0.102	0.0901111	0.8125	-0.29956
gnl|gene15402|XL-9_2-gene15402|rna44947|	adk.S	0.11	0.113	0.096	0.085	0.086	0.084	0.084	0.094	0.085	0.083	0.08	0.093	0.813636	-0.297544
gnl|gene13391|XL-9_2-gene13391|rna38956|	adnp.L	0.097	0.09	0.099	0.084	0.095	0.098	0.097	0.089	0.09	0.076	0.085	0.0932222	0.92268	-0.116097
gnl|gene4002|XL-9_2-gene4002|rna11637|	adnp.S	0.106	0.097	0.109	0.096	0.098	0.095	0.084	0.085	0.085	0.068	0.077	0.095	0.801887	-0.31853
gnl|gene15151|XL-9_2-gene15151|rna44229|	adnp2.L	0.09	0.104	0.111	0.095	0.103	0.109	0.092	0.097	0.069	0.066	0.065	0.0966667	0.922222	-0.116814
gnl|gene3172|XL-9_2-gene3172|rna9191|	ado.L	0.097	0.11	0.102	0.115	0.097	0.085	0.09	0.076	0.074	0.067	0.087	0.094	0.773196	-0.371094
gnl|gene1233|XL-9_2-gene1233|rna3584|	adpgkl.L	0.095	0.105	0.083	0.1	0.094	0.103	0.089	0.093	0.083	0.081	0.074	0.0938889	0.926316	-0.110424
gnl|gene13098|XL-9_2-gene13098|rna38080|	adprh	0.082	0.087	0.085	0.096	0.103	0.098	0.089	0.094	0.09	0.09	0.086	0.0915556	1.12195	0.16601
gnl|gene35677|XL-9_2-gene35677|rna75735|	adprh.L	0.105	0.08	0.096	0.084	0.098	0.076	0.114	0.082	0.1	0.077	0.087	0.0927778	0.866667	-0.206451
gnl|gene1437|XL-9_2-gene1437|rna4193|	adprm.L	0.076	0.07	0.09	0.119	0.128	0.087	0.077	0.077	0.099	0.077	0.1	0.0914444	1.15789	0.211504
gnl|gene11387|XL-9_2-gene11387|rna33094|	adprs.L	0.09	0.085	0.103	0.087	0.091	0.085	0.099	0.09	0.095	0.086	0.089	0.0916667	1.02778	0.0395284
gnl|gene7755|XL-9_2-gene7755|rna22642|	adrm1.L	0.091	0.099	0.101	0.089	0.078	0.082	0.054	0.058	0.076	0.132	0.139	0.0808889	0.736264	-0.441705
gnl|gene11779|XL-9_2-gene11779|rna34211|	adrm1.S	0.09	0.096	0.112	0.097	0.086	0.097	0.095	0.09	0.08	0.077	0.08	0.0936667	0.944444	-0.0824622
gnl|gene17107|XL-9_2-gene17107|rna49971|	adsl.L	0.097	0.1	0.096	0.09	0.098	0.093	0.087	0.087	0.088	0.079	0.085	0.0928889	0.902062	-0.148702
gnl|gene5585|XL-9_2-gene5585|rna16343|	adss1.L	0.187	0.097	0.187	0.093	0.036	0.078	0.035	0.045	0.028	0.057	0.157	0.0873333	0.195187	-2.35707
gnl|gene5693|XL-9_2-gene5693|rna16670|	adss2.L	0.08	0.078	0.087	0.077	0.085	0.081	0.089	0.094	0.089	0.119	0.12	0.0844444	1.14375	0.193772
gnl|gene38725|XL-9_2-gene38725|rna79999|	afdn.L	0.065	0.033	0.083	0.055	0.042	0.038	0.075	0.133	0.154	0.172	0.148	0.0753333	2.20769	1.14254
gnl|gene35070|XL-9_2-gene35070|rna74867|	afdn.S	0.086	0.083	0.091	0.086	0.092	0.094	0.097	0.103	0.095	0.09	0.085	0.0918889	1.15116	0.203092
gnl|gene11720|XL-9_2-gene11720|rna34052|	afg3l1p.S	0.091	0.089	0.088	0.085	0.091	0.091	0.094	0.097	0.096	0.089	0.088	0.0913333	1.06044	0.0846624
gnl|gene284|XL-9_2-gene284|rna813|	afg3l2.L	0.1	0.089	0.106	0.093	0.096	0.092	0.094	0.088	0.093	0.07	0.079	0.0945556	0.905	-0.14401
gnl|gene9441|XL-9_2-gene9441|rna27463|	afmid.L	0.092	0.091	0.076	0.08	0.104	0.118	0.084	0.114	0.089	0.084	0.068	0.0942222	1.10326	0.141774
gnl|gene14499|XL-9_2-gene14499|rna42213|	aftph.L	0.081	0.087	0.077	0.082	0.101	0.097	0.093	0.101	0.109	0.096	0.077	0.092	1.2963	0.374396
gnl|gene13213|XL-9_2-gene13213|rna38452|	aftph.S	0.087	0.092	0.098	0.088	0.099	0.097	0.101	0.088	0.083	0.085	0.082	0.0925556	0.982759	-0.025091
gnl|gene10277|XL-9_2-gene10277|rna29880|	aga.L	0.085	0.08	0.084	0.08	0.082	0.084	0.096	0.106	0.096	0.105	0.102	0.0881111	1.18824	0.248821
gnl|gene13571|XL-9_2-gene13571|rna39500|	agap1.L	0.08	0.097	0.088	0.107	0.099	0.098	0.077	0.097	0.088	0.09	0.08	0.0923333	1.15625	0.209453
gnl|gene13647|XL-9_2-gene13647|rna39714|	agbl5.L	0.088	0.089	0.08	0.087	0.112	0.094	0.095	0.098	0.087	0.084	0.086	0.0922222	1.05114	0.0719498
gnl|gene20014|XL-9_2-gene20014|rna58420|	agfg1.L	0.093	0.096	0.105	0.104	0.098	0.105	0.082	0.08	0.079	0.077	0.08	0.0935556	0.854839	-0.226276
gnl|gene12292|XL-9_2-gene12292|rna35730|	agfg1.S	0.099	0.104	0.103	0.098	0.102	0.096	0.077	0.074	0.082	0.081	0.083	0.0927778	0.787879	-0.343954
gnl|gene7966|XL-9_2-gene7966|rna23230|	aggf1.S	0.086	0.092	0.08	0.091	0.088	0.095	0.106	0.106	0.091	0.068	0.097	0.0927778	1.14535	0.195787
gnl|gene43910|XL-9_2-gene43910|rna87559|	agk.S	0.106	0.09	0.094	0.099	0.099	0.102	0.083	0.082	0.091	0.084	0.071	0.094	0.816038	-0.293292
gnl|gene6800|XL-9_2-gene6800|rna19901|	agl.L	0.093	0.09	0.092	0.093	0.087	0.089	0.097	0.108	0.088	0.083	0.08	0.093	1.05376	0.075551
gnl|gene4802|XL-9_2-gene4802|rna14022|	agl.S	0.085	0.084	0.077	0.078	0.086	0.082	0.1	0.1	0.099	0.103	0.107	0.0878889	1.17059	0.227234
gnl|gene13591|XL-9_2-gene13591|rna39551|	agmat.S	0.085	0.083	0.11	0.083	0.089	0.096	0.105	0.102	0.085	0.083	0.08	0.0931111	1.1	0.137504
gnl|gene11410|XL-9_2-gene11410|rna33164|	ago1.L	0.104	0.088	0.092	0.103	0.09	0.097	0.082	0.083	0.087	0.084	0.088	0.0917778	0.817308	-0.291049
gnl|gene37082|XL-9_2-gene37082|rna77690|	ago4.L	0.053	0.053	0.049	0.065	0.079	0.081	0.112	0.122	0.126	0.152	0.109	0.0822222	2.33962	1.22628
gnl|gene5727|XL-9_2-gene5727|rna16764|	agpat3.L	0.088	0.1	0.092	0.101	0.097	0.102	0.082	0.092	0.083	0.082	0.079	0.093	0.994318	-0.00822051
gnl|gene13045|XL-9_2-gene13045|rna37904|	agpat3.S	0.024	0.03	0.034	0.026	0.023	0.025	0.134	0.151	0.112	0.231	0.209	0.0621111	5.47917	2.45396
gnl|gene17213|XL-9_2-gene17213|rna50257|	agpat5.L	0.088	0.096	0.091	0.091	0.088	0.099	0.091	0.097	0.092	0.083	0.083	0.0925556	1.07386	0.102811
gnl|gene14326|XL-9_2-gene14326|rna41723|	agps.L	0.082	0.089	0.083	0.088	0.091	0.103	0.09	0.084	0.078	0.116	0.096	0.0875556	0.987805	-0.017702
gnl|gene36829|XL-9_2-gene36829|rna77329|	agps.S	0.098	0.1	0.103	0.102	0.092	0.111	0.084	0.082	0.083	0.076	0.069	0.095	0.841837	-0.248388
gnl|gene10404|XL-9_2-gene10404|rna30240|	agtrap.L	0.093	0.07	0.103	0.082	0.108	0.087	0.117	0.085	0.113	0.064	0.079	0.0953333	1.06452	0.0901978
gnl|gene324|XL-9_2-gene324|rna932|	ahctf1.L	0.093	0.09	0.083	0.085	0.096	0.095	0.092	0.094	0.092	0.091	0.09	0.0911111	1	0
gnl|gene26985|XL-9_2-gene26985|rna66490|	ahctf1.S	0.097	0.092	0.097	0.085	0.092	0.107	0.096	0.088	0.093	0.077	0.077	0.0941111	0.93299	-0.100067
gnl|gene13422|XL-9_2-gene13422|rna39058|	ahcy.L	0.09	0.104	0.09	0.103	0.093	0.094	0.087	0.084	0.093	0.082	0.08	0.0931111	0.983333	-0.0242475
gnl|gene16915|XL-9_2-gene16915|rna49432|	ahcy.S	0.091	0.084	0.091	0.124	0.102	0.091	0.081	0.077	0.1	0.077	0.08	0.0934444	0.972527	-0.0401891
gnl|gene9310|XL-9_2-gene9310|rna27052|	ahcyl2.L	0.083	0.111	0.091	0.143	0.084	0.078	0.079	0.064	0.127	0.069	0.069	0.0955556	1.1506	0.202389
gnl|gene11108|XL-9_2-gene11108|rna32278|	ahnak.L	0.096	0.074	0.103	0.089	0.083	0.086	0.101	0.094	0.103	0.095	0.075	0.0921111	1.02604	0.0370893
gnl|gene44374|XL-9_2-gene44374|rna88249|	ahnak.S	0.251	0.074	0.225	0.137	0.034	0.041	0.026	0.037	0.031	0.024	0.121	0.0951111	0.135458	-2.88408
gnl|gene15450|XL-9_2-gene15450|rna45100|	ahsa1.L	0.098	0.095	0.097	0.093	0.099	0.099	0.085	0.092	0.09	0.077	0.075	0.0942222	0.928571	-0.106915
gnl|gene14011|XL-9_2-gene14011|rna40815|	ahsa1.S	0.087	0.081	0.083	0.083	0.094	0.098	0.102	0.108	0.08	0.111	0.075	0.0906667	1.08046	0.111645
gnl|gene12706|XL-9_2-gene12706|rna36906|	aida.L	0.079	0.079	0.079	0.073	0.076	0.072	0.106	0.104	0.1	0.114	0.118	0.0853333	1.29114	0.368645
gnl|gene13130|XL-9_2-gene13130|rna38166|	aifm1.L	0.087	0.092	0.087	0.088	0.09	0.09	0.093	0.098	0.092	0.093	0.091	0.0907778	1.09195	0.126912
gnl|gene8072|XL-9_2-gene8072|rna23541|	aifm2.S	0.087	0.086	0.093	0.09	0.094	0.088	0.093	0.098	0.102	0.087	0.081	0.0923333	1.14943	0.200913
gnl|gene16653|XL-9_2-gene16653|rna48655|	aifm3-like.L	0.097	0.081	0.093	0.086	0.103	0.093	0.095	0.082	0.106	0.08	0.085	0.0928889	0.969072	-0.045324
gnl|gene5437|XL-9_2-gene5437|rna15941|	aimp1.L	0.09	0.086	0.099	0.091	0.094	0.098	0.083	0.085	0.105	0.083	0.087	0.0923333	1.05556	0.0780025
gnl|gene2980|XL-9_2-gene2980|rna8629|	aimp1.S	0.094	0.09	0.095	0.091	0.097	0.099	0.091	0.092	0.091	0.08	0.08	0.0933333	0.973404	-0.038889
gnl|gene3428|XL-9_2-gene3428|rna9975|	aimp2.L	0.084	0.102	0.085	0.108	0.099	0.109	0.076	0.095	0.081	0.083	0.078	0.0932222	1.04762	0.0671142
gnl|gene3043|XL-9_2-gene3043|rna8811|	aimp2.S	0.104	0.104	0.119	0.097	0.099	0.102	0.08	0.077	0.08	0.063	0.075	0.0957778	0.754808	-0.405819
gnl|gene41900|XL-9_2-gene41900|rna84534|	aip.L	0.099	0.088	0.095	0.091	0.106	0.095	0.1	0.086	0.089	0.075	0.076	0.0943333	0.883838	-0.178146
gnl|gene7943|XL-9_2-gene7943|rna23167|	ak2.L	0.038	0.064	0.047	0.042	0.049	0.039	0.079	0.083	0.096	0.231	0.233	0.0596667	2.35526	1.23589
gnl|gene5291|XL-9_2-gene5291|rna15490|	ak2.S	0.084	0.088	0.088	0.08	0.079	0.081	0.106	0.108	0.1	0.092	0.095	0.0904444	1.2381	0.308122
gnl|gene4921|XL-9_2-gene4921|rna14371|	ak6.L	0.099	0.095	0.099	0.094	0.098	0.09	0.09	0.099	0.092	0.07	0.075	0.0951111	0.964646	-0.0519278
gnl|gene1360|XL-9_2-gene1360|rna3977|	ak6.S	0.071	0.063	0.075	0.068	0.082	0.073	0.088	0.094	0.105	0.137	0.145	0.0798889	1.40141	0.486878
gnl|gene17266|XL-9_2-gene17266|rna50394|	akap1.S	0.091	0.08	0.092	0.08	0.087	0.078	0.073	0.075	0.113	0.086	0.146	0.0854444	1.03297	0.0467942
gnl|gene49322|XL-9_2-gene49322|rna95240|	akap12.L	0.084	0.079	0.117	0.098	0.11	0.096	0.087	0.078	0.098	0.074	0.08	0.0941111	1.04762	0.0671142
gnl|gene11524|XL-9_2-gene11524|rna33468|	akap12.S	0.215	0.084	0.177	0.129	0.057	0.057	0.053	0.05	0.037	0.037	0.104	0.0954444	0.202326	-2.30525
gnl|gene12385|XL-9_2-gene12385|rna36015|	akap13.S	0.103	0.098	0.104	0.105	0.093	0.076	0.078	0.092	0.1	0.09	0.062	0.0943333	0.932039	-0.101538
gnl|gene46009|XL-9_2-gene46009|rna90600|	akap7.2.L	0.129	0.089	0.109	0.123	0.081	0.089	0.069	0.059	0.075	0.079	0.098	0.0914444	0.51938	-0.945138
gnl|gene8731|XL-9_2-gene8731|rna25416|	akap8l.L	0.088	0.091	0.085	0.125	0.086	0.103	0.081	0.076	0.127	0.062	0.076	0.0957778	1.15341	0.205904
gnl|gene41290|XL-9_2-gene41290|rna83687|	akap9.S	0.054	0.057	0.09	0.135	0.105	0.102	0.087	0.087	0.091	0.093	0.099	0.0897778	1.64815	0.720846
gnl|gene14888|XL-9_2-gene14888|rna43457|	akr1a1.L	0.072	0.076	0.069	0.068	0.073	0.068	0.097	0.088	0.095	0.142	0.153	0.0784444	1.27083	0.345775
gnl|gene13451|XL-9_2-gene13451|rna39147|	akr1a1.S	0.09	0.106	0.063	0.073	0.072	0.075	0.108	0.098	0.101	0.094	0.121	0.0873333	1.10556	0.144772
gnl|gene11762|XL-9_2-gene11762|rna34160|	akr1b1.L	0.056	0.058	0.056	0.048	0.057	0.054	0.104	0.109	0.107	0.165	0.187	0.0721111	1.92857	0.947533
gnl|gene6914|XL-9_2-gene6914|rna20201|	akr1b1.S	0.073	0.088	0.066	0.082	0.075	0.076	0.084	0.093	0.094	0.138	0.13	0.0812222	1.28082	0.35707
gnl|gene13472|XL-9_2-gene13472|rna39194|	akr1c1.L	0.099	0.092	0.09	0.089	0.087	0.091	0.092	0.094	0.088	0.087	0.091	0.0913333	0.919192	-0.121562
gnl|gene5775|XL-9_2-gene5775|rna16895|	akr1c2.L	0.085	0.095	0.093	0.096	0.096	0.107	0.081	0.086	0.081	0.088	0.092	0.0911111	0.982353	-0.0256866
gnl|gene17842|XL-9_2-gene17842|rna52142|	akr7a2.L	0.089	0.087	0.099	0.092	0.094	0.09	0.084	0.082	0.083	0.096	0.105	0.0888889	0.926966	-0.109411
gnl|gene7353|XL-9_2-gene7353|rna21461|	akt1.S	0.092	0.092	0.101	0.098	0.091	0.102	0.092	0.091	0.088	0.082	0.068	0.0941111	0.972826	-0.0397462
gnl|gene36828|XL-9_2-gene36828|rna77327|	akt1s1.L	0.086	0.098	0.071	0.083	0.094	0.11	0.096	0.112	0.076	0.101	0.072	0.0917778	1.09302	0.128324
gnl|gene12365|XL-9_2-gene12365|rna35949|	akt1s1.S	0.051	0.052	0.062	0.066	0.093	0.105	0.11	0.129	0.135	0.112	0.085	0.0892222	2.58824	1.37197
gnl|gene13026|XL-9_2-gene13026|rna37849|	akt2.L	0.094	0.074	0.101	0.088	0.1	0.078	0.09	0.084	0.111	0.075	0.103	0.0911111	1.03723	0.0527415
gnl|gene11491|XL-9_2-gene11491|rna33389|	akt2.S	0.1	0.117	0.104	0.106	0.103	0.117	0.078	0.083	0.066	0.062	0.064	0.0971111	0.745	-0.424688
gnl|gene38525|XL-9_2-gene38525|rna79721|	alad.S	0.109	0.093	0.104	0.104	0.086	0.094	0.08	0.09	0.076	0.082	0.083	0.0928889	0.761468	-0.393145
gnl|gene18165|XL-9_2-gene18165|rna53083|	alas1.L	0.123	0.099	0.112	0.097	0.109	0.085	0.088	0.085	0.076	0.053	0.073	0.0971111	0.654472	-0.611598
gnl|gene16075|XL-9_2-gene16075|rna46987|	alas1.S	0.101	0.098	0.092	0.088	0.092	0.101	0.084	0.096	0.087	0.077	0.084	0.0932222	0.905941	-0.142512
gnl|gene14669|XL-9_2-gene14669|rna42750|	alb.S	0.086	0.086	0.092	0.088	0.088	0.086	0.091	0.092	0.092	0.096	0.102	0.089	1.06977	0.0972972
gnl|gene26035|XL-9_2-gene26035|rna65535|	alb-like.2.L	0.143	0.082	0.131	0.114	0.109	0.102	0.066	0.067	0.074	0.046	0.065	0.0986667	0.493007	-1.02032
gnl|gene4886|XL-9_2-gene4886|rna14265|	aldh16a1.L	0.083	0.084	0.085	0.088	0.089	0.085	0.091	0.093	0.091	0.103	0.108	0.0876667	1.10843	0.148523
gnl|gene34735|XL-9_2-gene34735|rna74408|	aldh16a1.S	0.092	0.085	0.092	0.095	0.096	0.094	0.093	0.089	0.099	0.081	0.085	0.0927778	1.02174	0.0310269
gnl|gene4586|XL-9_2-gene4586|rna13374|	aldh18a1.L	0.066	0.062	0.071	0.068	0.088	0.086	0.1	0.105	0.1	0.149	0.105	0.0828889	1.55303	0.635086
gnl|gene6930|XL-9_2-gene6930|rna20248|	aldh1a3.L	0.234	0.067	0.181	0.119	0.06	0.053	0.035	0.028	0.061	0.042	0.12	0.0931111	0.190171	-2.39463
gnl|gene13215|XL-9_2-gene13215|rna38466|	aldh1l2.L	0.098	0.09	0.097	0.096	0.097	0.097	0.09	0.088	0.094	0.076	0.078	0.0941111	0.928571	-0.106915
gnl|gene19217|XL-9_2-gene19217|rna56141|	aldh1l2.S	0.108	0.087	0.088	0.091	0.069	0.081	0.106	0.097	0.085	0.097	0.09	0.0902222	0.842593	-0.247093
gnl|gene9577|XL-9_2-gene9577|rna27865|	aldh2.L	0.085	0.093	0.081	0.081	0.078	0.08	0.1	0.105	0.1	0.098	0.099	0.0892222	1.20588	0.270089
gnl|gene3412|XL-9_2-gene3412|rna9934|	aldh3a2.L	0.078	0.092	0.058	0.071	0.078	0.075	0.09	0.108	0.122	0.109	0.119	0.0857778	1.47436	0.560088
gnl|gene8696|XL-9_2-gene8696|rna25319|	aldh3a2.S	0.1	0.097	0.098	0.095	0.099	0.096	0.085	0.084	0.083	0.081	0.082	0.093	0.835	-0.260152
gnl|gene9275|XL-9_2-gene9275|rna26929|	aldh3b1.L	0.151	0.159	0.11	0.099	0.08	0.085	0.066	0.065	0.05	0.048	0.087	0.0961111	0.380795	-1.39291
gnl|gene10012|XL-9_2-gene10012|rna29102|	aldh3b2.L	0.09	0.092	0.085	0.085	0.089	0.09	0.1	0.1	0.093	0.089	0.088	0.0915556	1.07222	0.100604
gnl|gene20121|XL-9_2-gene20121|rna58715|	aldh5a1.L	0.111	0.093	0.114	0.096	0.093	0.087	0.088	0.082	0.087	0.068	0.082	0.0945556	0.761261	-0.393536
gnl|gene7153|XL-9_2-gene7153|rna20877|	aldh6a1.L	0.09	0.093	0.094	0.093	0.094	0.094	0.088	0.087	0.088	0.088	0.09	0.0912222	0.972222	-0.040642
gnl|gene5375|XL-9_2-gene5375|rna15761|	aldh6a1.S	0.088	0.084	0.077	0.077	0.08	0.083	0.099	0.105	0.089	0.113	0.106	0.0868889	1.10227	0.140481
gnl|gene10316|XL-9_2-gene10316|rna29980|	aldh7a1.L	0.083	0.094	0.079	0.084	0.081	0.081	0.097	0.102	0.099	0.103	0.098	0.0888889	1.21084	0.276012
gnl|gene12271|XL-9_2-gene12271|rna35664|	aldh7a1.S	0.066	0.061	0.065	0.049	0.065	0.058	0.112	0.108	0.112	0.145	0.16	0.0773333	1.66667	0.736966
gnl|gene18019|XL-9_2-gene18019|rna52666|	aldh9a1.S	0.096	0.088	0.096	0.089	0.089	0.088	0.087	0.085	0.083	0.114	0.085	0.089	0.875	-0.192645
gnl|gene16277|XL-9_2-gene16277|rna47549|	aldoa.L	0.084	0.091	0.094	0.098	0.09	0.096	0.086	0.087	0.091	0.091	0.093	0.0907778	1.05952	0.083416
gnl|gene43317|XL-9_2-gene43317|rna86653|	aldoa.S	0.128	0.106	0.096	0.054	0.069	0.071	0.087	0.108	0.085	0.1	0.096	0.0893333	0.753906	-0.407543
gnl|gene15736|XL-9_2-gene15736|rna45960|	aldob.L	0.108	0.083	0.124	0.103	0.095	0.097	0.091	0.08	0.077	0.067	0.075	0.0953333	0.726852	-0.460267
gnl|gene13544|XL-9_2-gene13544|rna39422|	aldob.S	0.143	0.108	0.136	0.115	0.093	0.105	0.061	0.059	0.053	0.062	0.064	0.097	0.391608	-1.35252
gnl|gene3368|XL-9_2-gene3368|rna9787|	aldoc.L	0.09	0.084	0.108	0.088	0.091	0.089	0.096	0.093	0.097	0.08	0.084	0.0928889	1.05556	0.0780025
gnl|gene10847|XL-9_2-gene10847|rna31528|	alg1.L	0.077	0.094	0.084	0.084	0.089	0.092	0.098	0.084	0.1	0.099	0.1	0.0891111	1.19481	0.256775
gnl|gene43860|XL-9_2-gene43860|rna87497|	alg11.L	0.087	0.09	0.094	0.092	0.098	0.102	0.09	0.1	0.092	0.077	0.078	0.0938889	1.10345	0.142019
gnl|gene8143|XL-9_2-gene8143|rna23711|	alg13.L	0.105	0.106	0.107	0.111	0.106	0.094	0.086	0.079	0.074	0.058	0.074	0.0964444	0.728571	-0.456858
gnl|gene15751|XL-9_2-gene15751|rna46003|	alg13l.L	0.077	0.083	0.091	0.085	0.093	0.09	0.097	0.096	0.1	0.095	0.092	0.0902222	1.27273	0.347923
gnl|gene8415|XL-9_2-gene8415|rna24499|	alg2.L	0.091	0.096	0.098	0.109	0.101	0.101	0.083	0.087	0.081	0.078	0.074	0.0941111	0.923077	-0.115477
gnl|gene6580|XL-9_2-gene6580|rna19259|	alg5.S	0.091	0.09	0.083	0.085	0.083	0.084	0.094	0.101	0.089	0.1	0.1	0.0888889	1.04396	0.062061
gnl|gene9205|XL-9_2-gene9205|rna26736|	alg8.S	0.103	0.092	0.106	0.101	0.106	0.1	0.085	0.082	0.087	0.065	0.073	0.0957778	0.820388	-0.285621
gnl|gene38041|XL-9_2-gene38041|rna79040|	alg9.L	0.068	0.077	0.057	0.067	0.078	0.074	0.074	0.081	0.071	0.175	0.178	0.0718889	1.11765	0.160465
gnl|gene40719|XL-9_2-gene40719|rna82853|	alkbh1.L	0.089	0.081	0.092	0.102	0.103	0.101	0.084	0.083	0.102	0.078	0.086	0.093	1.03933	0.055648
gnl|gene36665|XL-9_2-gene36665|rna77091|	alkbh3.L	0.101	0.091	0.099	0.098	0.094	0.096	0.084	0.078	0.087	0.084	0.089	0.092	0.816832	-0.291889
gnl|gene49219|XL-9_2-gene49219|rna95108|	alkbh5.S	0.081	0.095	0.075	0.06	0.098	0.093	0.125	0.097	0.085	0.105	0.085	0.0898889	1.12346	0.167945
gnl|gene36327|XL-9_2-gene36327|rna76603|	alkbh6.L	0.085	0.083	0.115	0.102	0.104	0.102	0.089	0.08	0.105	0.064	0.071	0.0961111	1.08824	0.121991
gnl|gene45634|XL-9_2-gene45634|rna90104|	alkbh7.L	0.106	0.102	0.114	0.095	0.099	0.104	0.073	0.07	0.078	0.08	0.079	0.0934444	0.698113	-0.518467
gnl|gene40417|XL-9_2-gene40417|rna82416|	alkbh8.S	0.083	0.08	0.106	0.097	0.092	0.109	0.091	0.096	0.101	0.068	0.079	0.095	1.18675	0.247012
gnl|gene3152|XL-9_2-gene3152|rna9131|	alox12b.S	0.079	0.091	0.077	0.1	0.082	0.077	0.089	0.087	0.106	0.105	0.107	0.0875556	1.22152	0.288676
gnl|gene19893|XL-9_2-gene19893|rna58086|	alox15b.L	0.239	0.081	0.217	0.126	0.051	0.056	0.028	0.043	0.035	0.019	0.105	0.0973333	0.16318	-2.61546
gnl|gene13568|XL-9_2-gene13568|rna39490|	alpl.L	0.025	0.029	0.021	0.029	0.026	0.027	0.03	0.032	0.03	0.371	0.38	0.0276667	1.24	0.31034
gnl|gene19522|XL-9_2-gene19522|rna57044|	alyref.L	0.067	0.046	0.071	0.07	0.084	0.076	0.105	0.113	0.133	0.132	0.103	0.085	1.83582	0.876425
gnl|gene18345|XL-9_2-gene18345|rna53584|	alyref.S	0.057	0.054	0.057	0.067	0.088	0.085	0.099	0.122	0.12	0.158	0.092	0.0832222	2.12281	1.08597
gnl|gene6680|XL-9_2-gene6680|rna19554|	amacr.L	0.071	0.068	0.079	0.066	0.071	0.072	0.111	0.119	0.113	0.116	0.115	0.0855556	1.6338	0.708234
gnl|gene11222|XL-9_2-gene11222|rna32638|	ambp.L	0.096	0.083	0.108	0.125	0.108	0.109	0.08	0.074	0.075	0.063	0.08	0.0953333	0.776042	-0.365794
gnl|gene6525|XL-9_2-gene6525|rna19084|	ambra1.S	0.096	0.081	0.089	0.103	0.11	0.085	0.094	0.089	0.097	0.083	0.074	0.0937778	0.96875	-0.0458037
gnl|gene11258|XL-9_2-gene11258|rna32745|	amdhd1.L	0.083	0.086	0.078	0.073	0.08	0.077	0.102	0.099	0.097	0.11	0.114	0.0861111	1.18072	0.23967
gnl|gene39732|XL-9_2-gene39732|rna81442|	amdhd2.L	0.086	0.079	0.075	0.063	0.073	0.063	0.122	0.099	0.117	0.113	0.11	0.0863333	1.25581	0.328623
gnl|gene13233|XL-9_2-gene13233|rna38510|	amt.L	0.098	0.102	0.103	0.096	0.094	0.098	0.088	0.094	0.083	0.074	0.07	0.0951111	0.903061	-0.147104
gnl|gene19092|XL-9_2-gene19092|rna55749|	anapc1.S	0.093	0.089	0.089	0.087	0.098	0.099	0.087	0.09	0.095	0.086	0.087	0.0918889	0.994624	-0.00777735
gnl|gene14966|XL-9_2-gene14966|rna43675|	anapc2.L	0.094	0.092	0.1	0.101	0.1	0.103	0.087	0.086	0.086	0.075	0.077	0.0943333	0.914894	-0.128324
gnl|gene16266|XL-9_2-gene16266|rna47510|	anapc4.L	0.098	0.106	0.094	0.099	0.093	0.095	0.094	0.089	0.082	0.073	0.076	0.0944444	0.872449	-0.196857
gnl|gene3349|XL-9_2-gene3349|rna9733|	anapc5.L	0.083	0.08	0.083	0.087	0.089	0.089	0.092	0.086	0.085	0.115	0.112	0.086	1.03012	0.0428131
gnl|gene174|XL-9_2-gene174|rna485|	anapc7.S	0.098	0.098	0.102	0.098	0.104	0.107	0.089	0.082	0.076	0.07	0.075	0.0948889	0.806122	-0.310929
gnl|gene18106|XL-9_2-gene18106|rna52921|	angpt4.S	0.067	0.069	0.091	0.093	0.101	0.117	0.092	0.108	0.084	0.09	0.088	0.0913333	1.43284	0.518873
gnl|gene34364|XL-9_2-gene34364|rna73892|	ank1.L	0.093	0.101	0.073	0.085	0.09	0.088	0.09	0.102	0.088	0.094	0.095	0.09	1.02151	0.0306968
gnl|gene40796|XL-9_2-gene40796|rna82950|	ankfy1.L	0.089	0.088	0.101	0.084	0.096	0.093	0.096	0.091	0.092	0.081	0.089	0.0922222	1.02809	0.0399664
gnl|gene44018|XL-9_2-gene44018|rna87693|	ankfy1.S	0.086	0.094	0.081	0.085	0.087	0.084	0.096	0.092	0.094	0.096	0.104	0.0887778	1.0814	0.112894
gnl|gene14514|XL-9_2-gene14514|rna42265|	ankhd1.S	0.163	0.16	0.064	0.062	0.06	0.061	0.054	0.06	0.056	0.118	0.14	0.0822222	0.355828	-1.49075
gnl|gene8781|XL-9_2-gene8781|rna25566|	ankib1.S	0.094	0.102	0.08	0.089	0.094	0.101	0.098	0.102	0.092	0.071	0.076	0.0946667	1.03191	0.045324
gnl|gene4450|XL-9_2-gene4450|rna12983|	ankle2.L	0.085	0.087	0.079	0.086	0.105	0.108	0.1	0.094	0.102	0.084	0.07	0.094	1.15294	0.205319
gnl|gene36530|XL-9_2-gene36530|rna76905|	ankmy2.S	0.087	0.092	0.079	0.082	0.09	0.091	0.09	0.096	0.098	0.098	0.096	0.0894444	1.11494	0.156969
gnl|gene20101|XL-9_2-gene20101|rna58659|	ankrd13a.L	0.074	0.105	0.105	0.087	0.099	0.107	0.081	0.075	0.094	0.091	0.082	0.0918889	1.14189	0.191426
gnl|gene14658|XL-9_2-gene14658|rna42720|	ankrd13a.S	0.071	0.076	0.068	0.065	0.076	0.068	0.104	0.112	0.105	0.128	0.127	0.0827778	1.52817	0.611804
gnl|gene5650|XL-9_2-gene5650|rna16546|	ankrd16.L	0.083	0.1	0.075	0.084	0.089	0.084	0.087	0.085	0.087	0.115	0.112	0.086	1.03614	0.0512253
gnl|gene17289|XL-9_2-gene17289|rna50457|	ankrd27.L	0.093	0.093	0.101	0.096	0.1	0.097	0.083	0.085	0.083	0.08	0.089	0.0923333	0.903226	-0.146841
gnl|gene12078|XL-9_2-gene12078|rna35084|	ankrd52.S	0.111	0.114	0.108	0.093	0.102	0.096	0.077	0.089	0.076	0.058	0.076	0.0962222	0.743243	-0.428094
gnl|gene18223|XL-9_2-gene18223|rna53238|	ankzf1.L	0.1	0.096	0.096	0.107	0.109	0.098	0.069	0.073	0.085	0.085	0.083	0.0925556	0.79	-0.340075
gnl|gene44365|XL-9_2-gene44365|rna88207|	anln.L	0.07	0.067	0.071	0.071	0.096	0.099	0.096	0.098	0.12	0.124	0.088	0.0875556	1.55714	0.638901
gnl|gene17387|XL-9_2-gene17387|rna50761|	anln-like.1.L	0.081	0.084	0.089	0.095	0.099	0.1	0.095	0.086	0.099	0.087	0.084	0.092	1.14198	0.191531
gnl|gene37785|XL-9_2-gene37785|rna78631|	ano1.L	0.097	0.087	0.102	0.101	0.11	0.1	0.093	0.084	0.081	0.068	0.077	0.095	0.850515	-0.233591
gnl|gene10958|XL-9_2-gene10958|rna31855|	ano10.L	0.085	0.091	0.081	0.093	0.089	0.098	0.088	0.097	0.086	0.099	0.094	0.0897778	1.07647	0.106309
gnl|gene15898|XL-9_2-gene15898|rna46464|	anp32a.S	0.056	0.046	0.046	0.042	0.049	0.044	0.109	0.096	0.072	0.203	0.237	0.0622222	1.5	0.584963
gnl|gene15784|XL-9_2-gene15784|rna46111|	anp32b.L	0.097	0.103	0.088	0.093	0.091	0.096	0.08	0.087	0.078	0.1	0.088	0.0903333	0.850515	-0.233591
gnl|gene17236|XL-9_2-gene17236|rna50319|	anp32c.L	0.093	0.079	0.095	0.083	0.098	0.09	0.099	0.101	0.102	0.078	0.083	0.0933333	1.0914	0.126177
gnl|gene2458|XL-9_2-gene2458|rna7155|	anp32e.L	0.083	0.073	0.092	0.081	0.084	0.085	0.111	0.086	0.094	0.109	0.102	0.0876667	1.08434	0.116814
gnl|gene18526|XL-9_2-gene18526|rna54103|	anp32e.S	0.093	0.1	0.096	0.094	0.094	0.088	0.102	0.096	0.088	0.073	0.076	0.0945556	0.989247	-0.0155969
gnl|gene1078|XL-9_2-gene1078|rna3135|	anxa1.1.L	0.09	0.109	0.093	0.122	0.087	0.096	0.083	0.089	0.1	0.07	0.064	0.0965556	1.05	0.0703893
gnl|gene9914|XL-9_2-gene9914|rna28831|	anxa1.1.S	0.097	0.07	0.124	0.083	0.101	0.087	0.106	0.088	0.094	0.064	0.086	0.0944444	0.938144	-0.0921182
gnl|gene11418|XL-9_2-gene11418|rna33200|	anxa1.2.L	0.098	0.097	0.1	0.098	0.09	0.101	0.089	0.094	0.086	0.073	0.073	0.0947778	0.918367	-0.122857
gnl|gene50769|XL-9_2-gene50769|rna97410|	anxa1.2.S	0.12	0.131	0.125	0.091	0.09	0.096	0.074	0.073	0.066	0.069	0.064	0.0962222	0.579167	-0.78795
gnl|gene1029|XL-9_2-gene1029|rna3010|	anxa11.S	0.094	0.097	0.089	0.099	0.095	0.101	0.07	0.08	0.078	0.099	0.098	0.0892222	0.840426	-0.250808
gnl|gene9244|XL-9_2-gene9244|rna26841|	anxa2.L	0.155	0.091	0.146	0.109	0.061	0.078	0.055	0.07	0.056	0.067	0.113	0.0912222	0.406452	-1.29884
gnl|gene646|XL-9_2-gene646|rna1887|	anxa2.S	0.231	0.082	0.202	0.127	0.056	0.053	0.033	0.043	0.04	0.028	0.106	0.0963333	0.179654	-2.47671
gnl|gene353|XL-9_2-gene353|rna1022|	anxa3.L	0.114	0.111	0.109	0.094	0.093	0.092	0.091	0.086	0.082	0.062	0.066	0.0968889	0.736842	-0.440573
gnl|gene4754|XL-9_2-gene4754|rna13887|	anxa3.S	0.106	0.106	0.108	0.117	0.092	0.094	0.071	0.076	0.088	0.069	0.073	0.0953333	0.773585	-0.370368
gnl|gene3499|XL-9_2-gene3499|rna10184|	anxa4.L	0.088	0.09	0.088	0.082	0.088	0.087	0.1	0.101	0.096	0.092	0.088	0.0911111	1.11932	0.16262
gnl|gene5988|XL-9_2-gene5988|rna17519|	anxa5.L	0.079	0.099	0.063	0.075	0.077	0.081	0.094	0.108	0.088	0.119	0.117	0.0848889	1.24051	0.310929
gnl|gene14536|XL-9_2-gene14536|rna42332|	anxa5.S	0.063	0.076	0.072	0.077	0.071	0.069	0.108	0.114	0.109	0.123	0.12	0.0843333	1.76984	0.82362
gnl|gene8554|XL-9_2-gene8554|rna24883|	anxa6.L	0.247	0.077	0.2	0.138	0.047	0.044	0.033	0.04	0.04	0.028	0.105	0.0962222	0.161943	-2.62644
gnl|gene15916|XL-9_2-gene15916|rna46525|	anxa6.S	0.151	0.077	0.115	0.097	0.059	0.065	0.071	0.076	0.071	0.068	0.149	0.0868889	0.486755	-1.03873
gnl|gene19590|XL-9_2-gene19590|rna57249|	anxa7.L	0.092	0.095	0.084	0.092	0.092	0.096	0.091	0.097	0.086	0.089	0.085	0.0916667	0.994565	-0.00786212
gnl|gene6617|XL-9_2-gene6617|rna19358|	anxa7.S	0.09	0.099	0.092	0.111	0.095	0.088	0.087	0.079	0.104	0.075	0.081	0.0938889	1.01667	0.0238467
gnl|gene16584|XL-9_2-gene16584|rna48469|	anxa9.L	0.15	0.083	0.126	0.114	0.079	0.081	0.071	0.072	0.068	0.062	0.093	0.0937778	0.466667	-1.09954
gnl|gene44214|XL-9_2-gene44214|rna88010|	aox1.L	0.094	0.103	0.094	0.092	0.095	0.097	0.088	0.089	0.087	0.082	0.079	0.0932222	0.93617	-0.0951572
gnl|gene5691|XL-9_2-gene5691|rna16663|	ap1b1.L	0.092	0.089	0.095	0.089	0.097	0.094	0.096	0.092	0.093	0.081	0.08	0.093	1.00543	0.0078195
gnl|gene8433|XL-9_2-gene8433|rna24547|	ap1b1.S	0.09	0.086	0.091	0.101	0.105	0.094	0.101	0.097	0.083	0.077	0.074	0.0942222	1	0
gnl|gene10432|XL-9_2-gene10432|rna30318|	ap1g1.L	0.072	0.07	0.071	0.076	0.074	0.079	0.106	0.113	0.097	0.127	0.115	0.0842222	1.45833	0.544321
gnl|gene16204|XL-9_2-gene16204|rna47350|	ap1s1.S	0.079	0.082	0.079	0.092	0.084	0.111	0.099	0.111	0.104	0.091	0.07	0.0934444	1.36076	0.444412
gnl|gene45418|XL-9_2-gene45418|rna89779|	ap2a2.L	0.077	0.077	0.082	0.085	0.091	0.091	0.097	0.099	0.092	0.109	0.1	0.0878889	1.24026	0.310642
gnl|gene4059|XL-9_2-gene4059|rna11815|	ap2b1.S	0.082	0.079	0.086	0.087	0.092	0.095	0.101	0.102	0.094	0.095	0.086	0.0908889	1.19512	0.257158
gnl|gene14839|XL-9_2-gene14839|rna43291|	ap2m1.S	0.08	0.074	0.09	0.092	0.103	0.098	0.095	0.094	0.106	0.087	0.08	0.0924444	1.25	0.321928
gnl|gene15856|XL-9_2-gene15856|rna46322|	ap2s1.S	0.069	0.063	0.063	0.08	0.084	0.082	0.092	0.082	0.087	0.156	0.141	0.078	1.22464	0.292355
gnl|gene4326|XL-9_2-gene4326|rna12619|	ap3b1.L	0.087	0.089	0.094	0.097	0.093	0.096	0.086	0.097	0.083	0.088	0.087	0.0913333	1.03448	0.0489096
gnl|gene11147|XL-9_2-gene11147|rna32396|	ap3b2.S	0.088	0.083	0.101	0.098	0.09	0.095	0.095	0.104	0.094	0.085	0.069	0.0942222	1.125	0.169925
gnl|gene17637|XL-9_2-gene17637|rna51538|	ap3b2.S	0.072	0.075	0.075	0.073	0.084	0.08	0.105	0.115	0.11	0.103	0.108	0.0876667	1.5625	0.643856
gnl|gene15088|XL-9_2-gene15088|rna44026|	ap3d1.L	0.089	0.084	0.099	0.096	0.098	0.094	0.094	0.089	0.092	0.083	0.082	0.0927778	1.01685	0.0241125
gnl|gene11687|XL-9_2-gene11687|rna33962|	ap3d1.S	0.078	0.108	0.112	0.095	0.107	0.095	0.102	0.092	0.081	0.059	0.072	0.0966667	1.10897	0.149226
gnl|gene7995|XL-9_2-gene7995|rna23310|	ap3m2.S	0.098	0.092	0.098	0.086	0.087	0.088	0.097	0.1	0.095	0.079	0.081	0.0934444	0.994898	-0.00737953
gnl|gene17584|XL-9_2-gene17584|rna51354|	ap4b1.L	0.075	0.095	0.092	0.082	0.094	0.107	0.09	0.094	0.093	0.094	0.084	0.0913333	1.24667	0.318076
gnl|gene46217|XL-9_2-gene46217|rna90889|	ap4e1.S	0.087	0.084	0.102	0.092	0.103	0.094	0.096	0.09	0.09	0.081	0.081	0.0931111	1.03448	0.0489096
gnl|gene1033|XL-9_2-gene1033|rna3023|	ap4m1.S	0.088	0.092	0.102	0.091	0.11	0.107	0.092	0.08	0.085	0.075	0.079	0.0941111	0.9375	-0.0931094
gnl|gene6640|XL-9_2-gene6640|rna19433|	ap5m1.L	0.077	0.069	0.072	0.098	0.081	0.099	0.093	0.108	0.097	0.113	0.092	0.0882222	1.33117	0.412694
gnl|gene5016|XL-9_2-gene5016|rna14651|	ap5z1.S	0.08	0.075	0.088	0.093	0.1	0.117	0.096	0.094	0.092	0.092	0.073	0.0927778	1.1625	0.217231
gnl|gene5747|XL-9_2-gene5747|rna16817|	apaf1.L	0.097	0.095	0.105	0.099	0.1	0.101	0.085	0.086	0.085	0.073	0.074	0.0947778	0.881443	-0.18206
gnl|gene5689|XL-9_2-gene5689|rna16659|	apba1.L	0.106	0.11	0.112	0.101	0.1	0.1	0.082	0.069	0.07	0.071	0.079	0.0944444	0.65566	-0.608979
gnl|gene6910|XL-9_2-gene6910|rna20189|	apba3.L	0.095	0.096	0.088	0.098	0.098	0.093	0.087	0.089	0.088	0.081	0.086	0.0924444	0.931579	-0.10225
gnl|gene6775|XL-9_2-gene6775|rna19833|	apbb1.L	0.094	0.092	0.069	0.07	0.088	0.084	0.109	0.109	0.1	0.09	0.094	0.0905556	1.1117	0.15277
gnl|gene3528|XL-9_2-gene3528|rna10261|	apc.L	0.072	0.081	0.095	0.089	0.102	0.105	0.092	0.099	0.106	0.089	0.07	0.0934444	1.42361	0.509555
gnl|gene14921|XL-9_2-gene14921|rna43549|	apc.S	0.121	0.093	0.113	0.077	0.09	0.085	0.084	0.081	0.073	0.094	0.09	0.0907778	0.636364	-0.652077
gnl|gene1844|XL-9_2-gene1844|rna5379|	apcdd1.L	0.106	0.125	0.113	0.116	0.125	0.098	0.072	0.053	0.06	0.056	0.076	0.0964444	0.533019	-0.907741
gnl|gene14687|XL-9_2-gene14687|rna42801|	apex1.L	0.089	0.088	0.079	0.085	0.082	0.078	0.09	0.086	0.079	0.116	0.129	0.084	0.926966	-0.109411
gnl|gene35416|XL-9_2-gene35416|rna75386|	apex1.S	0.07	0.08	0.078	0.074	0.074	0.077	0.07	0.061	0.062	0.168	0.186	0.0717778	0.878571	-0.186769
gnl|gene14357|XL-9_2-gene14357|rna41818|	apex2.L	0.09	0.086	0.09	0.1	0.092	0.1	0.09	0.086	0.085	0.086	0.094	0.091	0.95	-0.0740006
gnl|gene12657|XL-9_2-gene12657|rna36767|	api5.L	0.111	0.097	0.105	0.11	0.108	0.097	0.08	0.076	0.087	0.061	0.068	0.0967778	0.734234	-0.445688
gnl|gene14264|XL-9_2-gene14264|rna41561|	api5.S	0.083	0.088	0.059	0.074	0.075	0.069	0.109	0.114	0.101	0.108	0.121	0.0857778	1.29518	0.373153
gnl|gene12985|XL-9_2-gene12985|rna37735|	aplf.L	0.101	0.102	0.087	0.094	0.087	0.105	0.084	0.085	0.091	0.08	0.083	0.0928889	0.871287	-0.19878
gnl|gene14841|XL-9_2-gene14841|rna43298|	aplp2.L	0.095	0.081	0.096	0.115	0.115	0.107	0.08	0.08	0.07	0.07	0.089	0.0932222	0.789474	-0.341037
gnl|gene11777|XL-9_2-gene11777|rna34205|	apmap.L	0.088	0.091	0.097	0.083	0.09	0.085	0.094	0.087	0.088	0.092	0.105	0.0892222	0.994318	-0.00822051
gnl|gene28576|XL-9_2-gene28576|rna68087|	apmap.S	0.083	0.09	0.097	0.091	0.094	0.095	0.108	0.091	0.096	0.077	0.079	0.0938889	1.12651	0.171855
gnl|gene46369|XL-9_2-gene46369|rna91101|	apob.L	0.119	0.085	0.11	0.105	0.121	0.098	0.083	0.062	0.077	0.064	0.076	0.0955556	0.584034	-0.775877
gnl|gene20167|XL-9_2-gene20167|rna58847|	apob.S	0.097	0.097	0.095	0.092	0.095	0.101	0.083	0.089	0.086	0.082	0.081	0.0927778	0.902062	-0.148702
gnl|gene17075|XL-9_2-gene17075|rna49879|	apoo.L	0.095	0.095	0.104	0.104	0.096	0.1	0.09	0.086	0.088	0.068	0.075	0.0953333	0.915789	-0.126912
gnl|gene46440|XL-9_2-gene46440|rna91213|	apool.L	0.096	0.103	0.089	0.095	0.103	0.093	0.086	0.087	0.084	0.082	0.082	0.0928889	0.890625	-0.16711
gnl|gene12380|XL-9_2-gene12380|rna35999|	app.L	0.112	0.114	0.12	0.116	0.113	0.127	0.07	0.067	0.059	0.048	0.054	0.0997778	0.5625	-0.830075
gnl|gene14075|XL-9_2-gene14075|rna41000|	appbp2.S	0.1	0.1	0.105	0.089	0.102	0.092	0.095	0.089	0.086	0.07	0.072	0.0953333	0.875	-0.192645
gnl|gene6725|XL-9_2-gene6725|rna19690|	appl1.L	0.085	0.087	0.082	0.085	0.085	0.082	0.096	0.104	0.099	0.096	0.098	0.0894444	1.19412	0.255945
gnl|gene8141|XL-9_2-gene8141|rna23705|	appl2.L	0.091	0.089	0.094	0.096	0.098	0.096	0.087	0.096	0.091	0.081	0.081	0.0931111	1.02747	0.0390998
gnl|gene11937|XL-9_2-gene11937|rna34658|	aprt.L	0.1	0.098	0.105	0.105	0.083	0.114	0.096	0.086	0.083	0.063	0.067	0.0966667	0.845	-0.242977
gnl|gene18206|XL-9_2-gene18206|rna53192|	aptx.L	0.111	0.123	0.086	0.099	0.125	0.113	0.056	0.058	0.064	0.094	0.071	0.0927778	0.54955	-0.863679
gnl|gene42408|XL-9_2-gene42408|rna85300|	aqr.L	0.086	0.087	0.083	0.09	0.093	0.095	0.093	0.092	0.093	0.095	0.093	0.0902222	1.07558	0.105117
gnl|gene4952|XL-9_2-gene4952|rna14476|	araf.L	0.077	0.079	0.088	0.087	0.106	0.106	0.099	0.096	0.1	0.072	0.089	0.0931111	1.27273	0.347923
gnl|gene10178|XL-9_2-gene10178|rna29594|	araf.S	0.104	0.094	0.089	0.093	0.086	0.096	0.091	0.086	0.089	0.087	0.085	0.092	0.841346	-0.249229
gnl|gene18790|XL-9_2-gene18790|rna54847|	arcn1.L	0.088	0.084	0.088	0.08	0.082	0.084	0.086	0.087	0.08	0.123	0.118	0.0843333	0.948864	-0.0757273
gnl|gene40921|XL-9_2-gene40921|rna83132|	arcn1.S	0.093	0.099	0.098	0.099	0.09	0.1	0.093	0.097	0.084	0.075	0.071	0.0947778	0.973118	-0.0393129
gnl|gene19999|XL-9_2-gene19999|rna58371|	arf4.S	0.069	0.082	0.068	0.107	0.081	0.108	0.097	0.122	0.086	0.114	0.066	0.0911111	1.50725	0.591915
gnl|gene5175|XL-9_2-gene5175|rna15141|	arf5.L	0.055	0.052	0.047	0.044	0.055	0.05	0.13	0.127	0.119	0.146	0.175	0.0754444	2.23636	1.16115
gnl|gene13452|XL-9_2-gene13452|rna39148|	arf6.2.S	0.094	0.093	0.096	0.099	0.1	0.097	0.083	0.088	0.097	0.075	0.078	0.0941111	0.984043	-0.0232074
gnl|gene16078|XL-9_2-gene16078|rna46997|	arfgap1l.S	0.098	0.083	0.095	0.091	0.092	0.098	0.091	0.088	0.093	0.084	0.087	0.0921111	0.923469	-0.114864
gnl|gene12025|XL-9_2-gene12025|rna34937|	arfgap2.L	0.083	0.085	0.078	0.077	0.091	0.097	0.099	0.094	0.091	0.106	0.098	0.0883333	1.11446	0.156342
gnl|gene16500|XL-9_2-gene16500|rna48206|	arfgap3.L	0.101	0.103	0.101	0.094	0.107	0.105	0.079	0.082	0.089	0.069	0.07	0.0956667	0.846535	-0.240359
gnl|gene15138|XL-9_2-gene15138|rna44186|	arfgap3.S	0.085	0.087	0.096	0.102	0.098	0.102	0.085	0.09	0.081	0.087	0.086	0.0917778	1.00588	0.00846158
gnl|gene19950|XL-9_2-gene19950|rna58241|	arfgef2-like.L	0.097	0.086	0.092	0.085	0.096	0.085	0.1	0.09	0.1	0.079	0.09	0.0923333	0.979381	-0.0300572
gnl|gene39371|XL-9_2-gene39371|rna80928|	arfip1.L	0.096	0.084	0.084	0.098	0.106	0.1	0.085	0.083	0.094	0.089	0.082	0.0922222	0.921875	-0.117357
gnl|gene9221|XL-9_2-gene9221|rna26784|	arfrp1.L	0.085	0.077	0.083	0.084	0.092	0.087	0.098	0.097	0.091	0.097	0.108	0.0882222	1.10588	0.145198
gnl|gene8517|XL-9_2-gene8517|rna24798|	arhgap1.S	0.105	0.091	0.102	0.113	0.091	0.105	0.081	0.093	0.076	0.07	0.072	0.0952222	0.804762	-0.313366
gnl|gene18060|XL-9_2-gene18060|rna52789|	arhgap11a.2.S	0.052	0.049	0.065	0.066	0.103	0.116	0.094	0.103	0.139	0.142	0.073	0.0874444	2.32692	1.21842
gnl|gene9644|XL-9_2-gene9644|rna28069|	arhgap12.S	0.086	0.093	0.084	0.088	0.097	0.091	0.094	0.098	0.088	0.093	0.089	0.091	1.0814	0.112894
gnl|gene36461|XL-9_2-gene36461|rna76812|	arhgap17.L	0.092	0.081	0.095	0.088	0.094	0.092	0.095	0.091	0.099	0.083	0.09	0.0918889	1.03261	0.0462937
gnl|gene13699|XL-9_2-gene13699|rna39851|	arhgap17.S	0.076	0.076	0.107	0.086	0.107	0.099	0.1	0.091	0.107	0.072	0.08	0.0943333	1.30263	0.381429
gnl|gene37013|XL-9_2-gene37013|rna77594|	arhgap18.L	0.099	0.095	0.106	0.102	0.105	0.103	0.084	0.082	0.081	0.071	0.071	0.0952222	0.823232	-0.280628
gnl|gene40599|XL-9_2-gene40599|rna82673|	arhgap25.L	0.086	0.091	0.089	0.086	0.09	0.104	0.096	0.098	0.088	0.09	0.083	0.092	1.0814	0.112894
gnl|gene4671|XL-9_2-gene4671|rna13646|	arhgap26.L	0.107	0.103	0.091	0.072	0.09	0.097	0.076	0.099	0.09	0.097	0.077	0.0916667	0.883178	-0.179225
gnl|gene13595|XL-9_2-gene13595|rna39566|	arhgap29.L	0.077	0.071	0.087	0.091	0.096	0.106	0.094	0.104	0.099	0.092	0.082	0.0916667	1.31818	0.398549
gnl|gene13563|XL-9_2-gene13563|rna39471|	arhgap29.S	0.063	0.08	0.097	0.087	0.106	0.063	0.105	0.104	0.093	0.1	0.103	0.0886667	1.56349	0.644772
gnl|gene37869|XL-9_2-gene37869|rna78748|	arhgap35.L	0.099	0.093	0.103	0.099	0.099	0.096	0.093	0.092	0.082	0.074	0.071	0.0951111	0.878788	-0.186413
gnl|gene18945|XL-9_2-gene18945|rna55307|	arhgap35.S	0.068	0.09	0.081	0.084	0.085	0.086	0.092	0.1	0.104	0.111	0.099	0.0877778	1.5	0.584963
gnl|gene2319|XL-9_2-gene2319|rna6757|	arhgap40.S	0.078	0.088	0.084	0.084	0.1	0.093	0.097	0.102	0.095	0.094	0.084	0.0912222	1.26282	0.33665
gnl|gene3241|XL-9_2-gene3241|rna9388|	arhgap5.L	0.108	0.08	0.074	0.1	0.096	0.099	0.093	0.077	0.087	0.088	0.098	0.0904444	0.759259	-0.397335
gnl|gene13535|XL-9_2-gene13535|rna39392|	arhgap5.S	0.096	0.087	0.095	0.094	0.094	0.101	0.087	0.092	0.092	0.084	0.078	0.0931111	0.958333	-0.0614005
gnl|gene46939|XL-9_2-gene46939|rna91918|	arhgap8.L	0.074	0.087	0.086	0.086	0.09	0.094	0.102	0.105	0.102	0.075	0.099	0.0917778	1.39865	0.484034
gnl|gene17447|XL-9_2-gene17447|rna50955|	arhgdia.L	0.092	0.083	0.101	0.096	0.103	0.096	0.085	0.099	0.09	0.076	0.079	0.0938889	1.02717	0.0386805
gnl|gene19451|XL-9_2-gene19451|rna56852|	arhgdig.L	0.103	0.086	0.097	0.104	0.102	0.105	0.086	0.087	0.087	0.074	0.07	0.0952222	0.84466	-0.243557
gnl|gene47123|XL-9_2-gene47123|rna92150|	arhgdig.S	0.09	0.092	0.102	0.092	0.098	0.104	0.093	0.089	0.084	0.082	0.073	0.0937778	0.961111	-0.0572249
gnl|gene48125|XL-9_2-gene48125|rna93571|	arhgef1.S	0.094	0.09	0.095	0.096	0.096	0.097	0.09	0.093	0.091	0.081	0.077	0.0935556	0.978723	-0.0310269
gnl|gene16144|XL-9_2-gene16144|rna47192|	arhgef10.L	0.099	0.102	0.099	0.105	0.103	0.107	0.079	0.082	0.073	0.074	0.078	0.0943333	0.782828	-0.353232
gnl|gene39679|XL-9_2-gene39679|rna81352|	arhgef12.L	0.087	0.097	0.1	0.104	0.084	0.103	0.095	0.1	0.087	0.07	0.072	0.0952222	1.07471	0.103951
gnl|gene38661|XL-9_2-gene38661|rna79897|	arhgef12.S	0.094	0.092	0.098	0.101	0.101	0.1	0.084	0.079	0.092	0.076	0.083	0.0934444	0.909574	-0.136736
gnl|gene2157|XL-9_2-gene2157|rna6258|	arhgef16.L	0.089	0.085	0.108	0.092	0.094	0.096	0.101	0.086	0.083	0.074	0.092	0.0926667	0.949438	-0.074854
gnl|gene48565|XL-9_2-gene48565|rna94181|	arhgef7.S	0.06	0.065	0.076	0.083	0.086	0.088	0.109	0.121	0.114	0.112	0.086	0.0891111	1.95833	0.969626
gnl|gene44544|XL-9_2-gene44544|rna88516|	arid1b.L	0.079	0.085	0.09	0.081	0.09	0.09	0.091	0.098	0.101	0.095	0.098	0.0894444	1.25949	0.332844
gnl|gene14899|XL-9_2-gene14899|rna43490|	arid2.L	0.092	0.095	0.086	0.105	0.101	0.103	0.094	0.089	0.083	0.079	0.072	0.0942222	0.934783	-0.0972972
gnl|gene1927|XL-9_2-gene1927|rna5614|	arid2.S	0.077	0.075	0.102	0.106	0.107	0.109	0.098	0.101	0.082	0.078	0.064	0.0952222	1.18831	0.248913
gnl|gene5929|XL-9_2-gene5929|rna17355|	arid3a.L	0.068	0.105	0.075	0.095	0.107	0.101	0.087	0.087	0.08	0.1	0.095	0.0894444	1.22794	0.296241
gnl|gene37367|XL-9_2-gene37367|rna78071|	arid4a.L	0.055	0.06	0.082	0.086	0.108	0.13	0.108	0.111	0.099	0.093	0.067	0.0932222	1.90909	0.932886
gnl|gene7190|XL-9_2-gene7190|rna20975|	arih1.S	0.077	0.097	0.04	0.073	0.07	0.057	0.076	0.118	0.108	0.126	0.159	0.0795556	1.46753	0.553392
gnl|gene18443|XL-9_2-gene18443|rna53867|	arih2.L	0.091	0.097	0.093	0.098	0.094	0.1	0.086	0.096	0.087	0.08	0.079	0.0935556	1.00549	0.0079052
gnl|gene13258|XL-9_2-gene13258|rna38591|	arih2.S	0.067	0.09	0.06	0.062	0.078	0.079	0.114	0.128	0.11	0.106	0.107	0.0875556	1.77612	0.828729
gnl|gene17856|XL-9_2-gene17856|rna52172|	arl10.L	0.085	0.093	0.073	0.092	0.086	0.096	0.098	0.095	0.099	0.097	0.085	0.0907778	1.14118	0.190522
gnl|gene6555|XL-9_2-gene6555|rna19192|	arl10b.L	0.077	0.077	0.077	0.073	0.076	0.073	0.096	0.107	0.09	0.124	0.13	0.0828889	1.27922	0.355265
gnl|gene11705|XL-9_2-gene11705|rna34007|	arl14ep.S	0.089	0.089	0.099	0.1	0.103	0.107	0.089	0.087	0.088	0.08	0.07	0.0945556	0.983146	-0.0245223
gnl|gene742|XL-9_2-gene742|rna2162|	arl2.L	0.092	0.088	0.087	0.1	0.099	0.089	0.094	0.1	0.094	0.081	0.076	0.0936667	1.05435	0.0763509
gnl|gene12208|XL-9_2-gene12208|rna35487|	arl2bp.L	0.093	0.09	0.095	0.101	0.096	0.098	0.1	0.085	0.093	0.079	0.069	0.0945556	0.956989	-0.0634254
gnl|gene5742|XL-9_2-gene5742|rna16804|	arl3.S	0.076	0.075	0.087	0.073	0.07	0.064	0.121	0.125	0.108	0.101	0.1	0.0887778	1.53289	0.616259
gnl|gene45105|XL-9_2-gene45105|rna89329|	arl6.L	0.081	0.086	0.064	0.072	0.076	0.076	0.099	0.109	0.104	0.118	0.114	0.0852222	1.31481	0.39486
gnl|gene38178|XL-9_2-gene38178|rna79237|	arl6.S	0.096	0.08	0.103	0.084	0.1	0.09	0.098	0.096	0.1	0.078	0.075	0.0941111	1.02083	0.0297473
gnl|gene7834|XL-9_2-gene7834|rna22857|	arl6ip1.L	0.092	0.091	0.081	0.101	0.103	0.091	0.08	0.09	0.092	0.087	0.093	0.0912222	0.98913	-0.0157673
gnl|gene3316|XL-9_2-gene3316|rna9622|	arl6ip1.S	0.088	0.1	0.098	0.1	0.105	0.117	0.083	0.086	0.097	0.068	0.06	0.0971111	1.03977	0.0562682
gnl|gene1500|XL-9_2-gene1500|rna4363|	arl6ip5.L	0.11	0.082	0.112	0.097	0.102	0.085	0.096	0.08	0.096	0.055	0.084	0.0955556	0.8	-0.321928
gnl|gene9793|XL-9_2-gene9793|rna28476|	arl8b.S	0.093	0.106	0.099	0.101	0.094	0.09	0.107	0.082	0.088	0.069	0.07	0.0955556	0.913978	-0.129768
gnl|gene6705|XL-9_2-gene6705|rna19636|	arl9.L	0.066	0.072	0.044	0.059	0.079	0.07	0.102	0.096	0.071	0.179	0.161	0.0732222	1.26515	0.33931
gnl|gene16803|XL-9_2-gene16803|rna49097|	armc1.L	0.094	0.107	0.091	0.085	0.099	0.097	0.088	0.1	0.102	0.064	0.071	0.0958889	1.07447	0.103623
gnl|gene10938|XL-9_2-gene10938|rna31789|	armc1.S	0.083	0.081	0.091	0.089	0.094	0.095	0.096	0.097	0.092	0.089	0.094	0.0908889	1.13855	0.187203
gnl|gene12656|XL-9_2-gene12656|rna36765|	armc10.L	0.106	0.108	0.106	0.104	0.104	0.104	0.078	0.082	0.074	0.069	0.067	0.0962222	0.735849	-0.442518
gnl|gene2877|XL-9_2-gene2877|rna8358|	armc2.L	0.092	0.085	0.086	0.087	0.103	0.096	0.093	0.09	0.089	0.084	0.094	0.0912222	0.972826	-0.0397462
gnl|gene8555|XL-9_2-gene8555|rna24888|	armc6.L	0.097	0.094	0.098	0.093	0.096	0.096	0.082	0.078	0.074	0.095	0.096	0.0897778	0.783505	-0.351985
gnl|gene14637|XL-9_2-gene14637|rna42659|	armc7.L	0.067	0.065	0.09	0.084	0.085	0.08	0.105	0.099	0.116	0.108	0.101	0.0878889	1.60448	0.682104
gnl|gene47734|XL-9_2-gene47734|rna92981|	armc8.L	0.091	0.092	0.095	0.098	0.097	0.102	0.092	0.082	0.09	0.079	0.083	0.0932222	0.945055	-0.0815299
gnl|gene9208|XL-9_2-gene9208|rna26745|	armc8.S	0.091	0.089	0.085	0.097	0.099	0.103	0.089	0.095	0.101	0.074	0.077	0.0943333	1.07692	0.106915
gnl|gene6469|XL-9_2-gene6469|rna18926|	armc9.L	0.101	0.077	0.091	0.093	0.098	0.096	0.092	0.094	0.103	0.077	0.076	0.0938889	0.975248	-0.0361597
gnl|gene10799|XL-9_2-gene10799|rna31392|	armh3.L	0.073	0.075	0.074	0.082	0.076	0.083	0.063	0.074	0.067	0.17	0.165	0.0741111	0.965753	-0.0502732
gnl|gene11296|XL-9_2-gene11296|rna32851|	armt1.L	0.095	0.09	0.102	0.088	0.097	0.093	0.1	0.089	0.091	0.073	0.081	0.0938889	0.947368	-0.0780025
gnl|gene18659|XL-9_2-gene18659|rna54473|	arpc1a.L	0.096	0.079	0.111	0.088	0.117	0.09	0.097	0.082	0.088	0.067	0.085	0.0942222	0.885417	-0.175572
gnl|gene15436|XL-9_2-gene15436|rna45060|	arpc1a.S	0.093	0.084	0.102	0.096	0.105	0.098	0.089	0.085	0.089	0.08	0.079	0.0934444	0.935484	-0.0962153
gnl|gene3179|XL-9_2-gene3179|rna9215|	arpc1b.L	0.113	0.085	0.088	0.099	0.084	0.081	0.086	0.084	0.083	0.086	0.111	0.0892222	0.738938	-0.436475
gnl|gene44998|XL-9_2-gene44998|rna89172|	arpc2.L	0.136	0.117	0.129	0.088	0.089	0.082	0.074	0.08	0.082	0.058	0.066	0.0974444	0.595588	-0.747613
gnl|gene4238|XL-9_2-gene4238|rna12333|	arpc2.S	0.058	0.095	0.054	0.077	0.075	0.075	0.103	0.103	0.111	0.11	0.138	0.0834444	1.84483	0.883486
gnl|gene20455|XL-9_2-gene20455|rna59743|	arpc3.L	0.103	0.097	0.116	0.107	0.1	0.088	0.097	0.089	0.079	0.061	0.062	0.0973333	0.815534	-0.294183
gnl|gene9541|XL-9_2-gene9541|rna27753|	arpc5.L	0.104	0.1	0.1	0.096	0.101	0.102	0.084	0.086	0.084	0.073	0.07	0.0952222	0.817308	-0.291049
gnl|gene9061|XL-9_2-gene9061|rna26368|	arpc5.S	0.09	0.084	0.09	0.08	0.088	0.081	0.098	0.087	0.108	0.089	0.104	0.0895556	1.08333	0.115477
gnl|gene12819|XL-9_2-gene12819|rna37261|	arpc5l.L	0.096	0.09	0.104	0.093	0.108	0.095	0.091	0.085	0.088	0.073	0.077	0.0944444	0.901042	-0.150334
gnl|gene414|XL-9_2-gene414|rna1196|	arpin.L	0.101	0.088	0.1	0.103	0.092	0.091	0.087	0.09	0.086	0.079	0.085	0.0931111	0.871287	-0.19878
gnl|gene13125|XL-9_2-gene13125|rna38151|	arpp19.L	0.094	0.087	0.1	0.085	0.099	0.089	0.08	0.075	0.077	0.106	0.11	0.0873333	0.808511	-0.306661
gnl|gene17536|XL-9_2-gene17536|rna51204|	arpp19.S	0.109	0.083	0.125	0.092	0.106	0.083	0.09	0.075	0.089	0.063	0.084	0.0946667	0.752294	-0.410632
gnl|gene3863|XL-9_2-gene3863|rna11262|	arrdc1.S	0.083	0.07	0.086	0.087	0.108	0.123	0.097	0.086	0.098	0.088	0.075	0.0931111	1.10843	0.148523
gnl|gene785|XL-9_2-gene785|rna2287|	arsa.1.S	0.08	0.094	0.096	0.092	0.098	0.1	0.089	0.088	0.096	0.085	0.084	0.0925556	1.15	0.201634
gnl|gene1089|XL-9_2-gene1089|rna3161|	arsb.L	0.072	0.085	0.062	0.064	0.073	0.076	0.12	0.125	0.093	0.108	0.121	0.0855556	1.51389	0.598259
gnl|gene10968|XL-9_2-gene10968|rna31895|	arsd.L	0.086	0.091	0.093	0.099	0.093	0.101	0.086	0.093	0.09	0.088	0.08	0.0924444	1.06395	0.0894351
gnl|gene13848|XL-9_2-gene13848|rna40320|	arsh.L	0.085	0.091	0.083	0.092	0.092	0.093	0.091	0.098	0.093	0.09	0.091	0.0908889	1.12353	0.168038
gnl|gene6693|XL-9_2-gene6693|rna19594|	arvcf.L	0.087	0.086	0.098	0.1	0.091	0.094	0.091	0.092	0.089	0.091	0.082	0.092	1.04023	0.0569024
gnl|gene12581|XL-9_2-gene12581|rna36565|	asah1.L	0.087	0.083	0.081	0.081	0.089	0.081	0.096	0.098	0.1	0.099	0.105	0.0884444	1.13793	0.186413
gnl|gene38208|XL-9_2-gene38208|rna79274|	asap2.L	0.085	0.094	0.105	0.098	0.097	0.097	0.081	0.099	0.089	0.08	0.075	0.0938889	1.10588	0.145198
gnl|gene12889|XL-9_2-gene12889|rna37455|	asb3.S	0.07	0.082	0.088	0.095	0.094	0.114	0.095	0.097	0.096	0.087	0.083	0.0923333	1.37857	0.463174
gnl|gene17699|XL-9_2-gene17699|rna51722|	ascc1.L	0.093	0.079	0.103	0.091	0.101	0.094	0.094	0.086	0.095	0.084	0.079	0.0928889	0.973118	-0.0393129
gnl|gene37179|XL-9_2-gene37179|rna77829|	ascc2.S	0.085	0.088	0.095	0.093	0.091	0.098	0.102	0.096	0.094	0.079	0.079	0.0935556	1.11765	0.160465
gnl|gene8715|XL-9_2-gene8715|rna25369|	ascc3.L	0.088	0.079	0.091	0.087	0.098	0.095	0.098	0.097	0.098	0.089	0.079	0.0923333	1.10795	0.147899
gnl|gene12090|XL-9_2-gene12090|rna35120|	asf1b.L	0.072	0.068	0.072	0.072	0.076	0.071	0.072	0.071	0.071	0.181	0.172	0.0716667	0.986111	-0.0201779
gnl|gene4575|XL-9_2-gene4575|rna13340|	ash2l.L	0.078	0.084	0.096	0.096	0.093	0.104	0.095	0.099	0.104	0.078	0.073	0.0943333	1.30128	0.379934
gnl|gene14138|XL-9_2-gene14138|rna41176|	ash2l.S	0.077	0.062	0.065	0.066	0.074	0.085	0.11	0.094	0.115	0.141	0.111	0.0831111	1.35714	0.440573
gnl|gene41266|XL-9_2-gene41266|rna83639|	asl.L	0.083	0.09	0.084	0.09	0.085	0.093	0.092	0.104	0.093	0.098	0.089	0.0904444	1.18675	0.247012
gnl|gene1407|XL-9_2-gene1407|rna4109|	asmtl.L	0.097	0.093	0.096	0.112	0.099	0.113	0.09	0.073	0.074	0.066	0.086	0.0941111	0.757732	-0.40024
gnl|gene485|XL-9_2-gene485|rna1389|	asnsd1.L	0.089	0.091	0.09	0.093	0.091	0.102	0.094	0.093	0.096	0.079	0.081	0.0932222	1.0618	0.086509
gnl|gene35314|XL-9_2-gene35314|rna75248|	aspg.L	0.078	0.076	0.092	0.092	0.103	0.091	0.099	0.106	0.095	0.088	0.081	0.0924444	1.28846	0.365649
gnl|gene6736|XL-9_2-gene6736|rna19716|	asph.S	0.054	0.056	0.044	0.059	0.053	0.053	0.079	0.096	0.089	0.229	0.189	0.0647778	1.71296	0.776494
gnl|gene2081|XL-9_2-gene2081|rna6040|	aspscr1.S	0.096	0.098	0.094	0.085	0.089	0.089	0.089	0.085	0.084	0.093	0.099	0.0898889	0.880208	-0.184083
gnl|gene41074|XL-9_2-gene41074|rna83351|	asrgl1.L	0.053	0.079	0.055	0.057	0.051	0.064	0.063	0.06	0.047	0.247	0.225	0.0587778	1.00943	0.0135465
gnl|gene35400|XL-9_2-gene35400|rna75368|	astl.L	0.091	0.108	0.091	0.1	0.1	0.102	0.085	0.093	0.082	0.076	0.072	0.0946667	0.961538	-0.0565835
gnl|gene11037|XL-9_2-gene11037|rna32095|	atad1.S	0.091	0.082	0.091	0.1	0.104	0.099	0.09	0.089	0.095	0.078	0.081	0.0934444	1.01099	0.0157673
gnl|gene36365|XL-9_2-gene36365|rna76667|	atad2.S	0.083	0.09	0.088	0.09	0.09	0.091	0.092	0.086	0.084	0.109	0.096	0.0882222	1.0241	0.0343515
gnl|gene47377|XL-9_2-gene47377|rna92509|	atad2b.L	0.09	0.112	0.08	0.071	0.088	0.099	0.092	0.087	0.11	0.094	0.077	0.0921111	1.09444	0.130199
gnl|gene8393|XL-9_2-gene8393|rna24438|	atad3a.S	0.071	0.064	0.09	0.082	0.105	0.105	0.106	0.108	0.11	0.093	0.065	0.0934444	1.53521	0.618437
gnl|gene13456|XL-9_2-gene13456|rna39157|	atad5.L	0.088	0.094	0.098	0.098	0.093	0.104	0.085	0.09	0.091	0.086	0.073	0.0934444	1.02841	0.0404143
gnl|gene4102|XL-9_2-gene4102|rna11946|	atat1.S	0.048	0.049	0.079	0.07	0.084	0.101	0.102	0.124	0.142	0.123	0.078	0.0887778	2.77083	1.47032
gnl|gene10234|XL-9_2-gene10234|rna29757|	ate1.S	0.093	0.081	0.104	0.112	0.096	0.098	0.095	0.081	0.089	0.066	0.087	0.0943333	0.913978	-0.129768
gnl|gene46197|XL-9_2-gene46197|rna90856|	atf1.L	0.07	0.078	0.092	0.096	0.103	0.106	0.098	0.096	0.096	0.088	0.078	0.0927778	1.37143	0.455679
gnl|gene4107|XL-9_2-gene4107|rna11962|	atf7ip.L	0.066	0.07	0.069	0.078	0.11	0.106	0.096	0.109	0.102	0.109	0.083	0.0895556	1.59848	0.676705
gnl|gene16964|XL-9_2-gene16964|rna49567|	atf7ip.S	0.074	0.07	0.093	0.086	0.105	0.103	0.095	0.1	0.102	0.097	0.076	0.092	1.36486	0.448758
gnl|gene7581|XL-9_2-gene7581|rna22107|	atg12.S	0.092	0.079	0.094	0.087	0.098	0.081	0.108	0.096	0.104	0.079	0.08	0.0932222	1.08696	0.120294
gnl|gene18507|XL-9_2-gene18507|rna54033|	atg13.S	0.091	0.103	0.108	0.116	0.103	0.094	0.077	0.094	0.075	0.08	0.059	0.0956667	0.928571	-0.106915
gnl|gene41268|XL-9_2-gene41268|rna83647|	atg16l1.L	0.064	0.056	0.045	0.05	0.052	0.051	0.092	0.103	0.083	0.202	0.2	0.0662222	1.45312	0.539159
gnl|gene9947|XL-9_2-gene9947|rna28915|	atg2a.L	0.084	0.098	0.084	0.101	0.088	0.089	0.08	0.082	0.09	0.103	0.1	0.0884444	1.02381	0.0339473
gnl|gene17938|XL-9_2-gene17938|rna52444|	atg2b.L	0.089	0.098	0.094	0.092	0.094	0.094	0.092	0.09	0.095	0.085	0.077	0.0931111	1.03933	0.055648
gnl|gene13426|XL-9_2-gene13426|rna39067|	atg2b.S	0.094	0.106	0.091	0.087	0.096	0.099	0.086	0.085	0.081	0.086	0.088	0.0916667	0.882979	-0.179549
gnl|gene40355|XL-9_2-gene40355|rna82315|	atg3.L	0.092	0.085	0.093	0.085	0.101	0.086	0.093	0.088	0.104	0.082	0.092	0.0918889	1.04348	0.0614005
gnl|gene16553|XL-9_2-gene16553|rna48358|	atg3.S	0.093	0.093	0.089	0.106	0.103	0.101	0.082	0.088	0.084	0.087	0.073	0.0932222	0.924731	-0.112894
gnl|gene17865|XL-9_2-gene17865|rna52201|	atg4a.L	0.08	0.092	0.088	0.077	0.089	0.074	0.102	0.111	0.102	0.09	0.094	0.0905556	1.33125	0.412782
gnl|gene19126|XL-9_2-gene19126|rna55861|	atg4b.L	0.08	0.113	0.09	0.107	0.096	0.119	0.092	0.093	0.07	0.079	0.062	0.0955556	1.01875	0.0268001
gnl|gene9664|XL-9_2-gene9664|rna28117|	atg5.L	0.093	0.087	0.098	0.081	0.097	0.094	0.094	0.095	0.093	0.083	0.085	0.0924444	1.01075	0.01543
gnl|gene19511|XL-9_2-gene19511|rna57015|	atg7.L	0.096	0.102	0.095	0.103	0.094	0.107	0.083	0.09	0.081	0.079	0.071	0.0945556	0.890625	-0.16711
gnl|gene14313|XL-9_2-gene14313|rna41694|	atic.L	0.084	0.09	0.083	0.089	0.087	0.09	0.092	0.093	0.099	0.096	0.098	0.0896667	1.14286	0.192645
gnl|gene850|XL-9_2-gene850|rna2496|	atic.S	0.088	0.095	0.097	0.106	0.093	0.1	0.087	0.088	0.099	0.073	0.073	0.0947778	1.0625	0.0874628
gnl|gene13343|XL-9_2-gene13343|rna38829|	atl2.L	0.094	0.081	0.093	0.091	0.101	0.098	0.094	0.087	0.09	0.08	0.09	0.0921111	0.941489	-0.0869833
gnl|gene12181|XL-9_2-gene12181|rna35389|	atl2-like.S	0.079	0.099	0.094	0.104	0.086	0.105	0.097	0.097	0.08	0.081	0.079	0.0934444	1.12025	0.163825
gnl|gene6252|XL-9_2-gene6252|rna18286|	atl3.L	0.084	0.082	0.084	0.087	0.082	0.084	0.098	0.106	0.094	0.099	0.1	0.089	1.19048	0.251539
gnl|gene13881|XL-9_2-gene13881|rna40419|	atox1.L	0.085	0.08	0.075	0.077	0.082	0.085	0.094	0.094	0.104	0.108	0.116	0.0862222	1.16471	0.219966
gnl|gene13629|XL-9_2-gene13629|rna39671|	atp11c.L	0.084	0.087	0.064	0.084	0.099	0.094	0.104	0.09	0.1	0.106	0.089	0.0895556	1.13095	0.177538
gnl|gene18764|XL-9_2-gene18764|rna54773|	atp11c.S	0.09	0.088	0.103	0.106	0.091	0.102	0.087	0.096	0.084	0.072	0.08	0.0941111	1	0
gnl|gene34617|XL-9_2-gene34617|rna74241|	atp13a1.L	0.097	0.096	0.096	0.093	0.105	0.098	0.09	0.085	0.087	0.076	0.077	0.0941111	0.886598	-0.173648
gnl|gene39313|XL-9_2-gene39313|rna80848|	atp13a2.L	0.101	0.084	0.089	0.104	0.102	0.09	0.084	0.067	0.095	0.089	0.095	0.0906667	0.80198	-0.318361
gnl|gene14665|XL-9_2-gene14665|rna42743|	atp1a1.L	0.109	0.088	0.1	0.093	0.085	0.082	0.08	0.09	0.079	0.094	0.1	0.0895556	0.775229	-0.367305
gnl|gene39150|XL-9_2-gene39150|rna80644|	atp1a1.S	0.101	0.08	0.108	0.095	0.1	0.095	0.086	0.083	0.093	0.071	0.089	0.0934444	0.871287	-0.19878
gnl|gene12419|XL-9_2-gene12419|rna36106|	atp1a2.S	0.08	0.106	0.122	0.085	0.075	0.108	0.073	0.099	0.1	0.078	0.074	0.0942222	1.24375	0.314697
gnl|gene3713|XL-9_2-gene3713|rna10815|	atp1b1.L	0.233	0.087	0.171	0.147	0.046	0.048	0.033	0.039	0.04	0.034	0.122	0.0937778	0.169528	-2.56041
gnl|gene5134|XL-9_2-gene5134|rna15023|	atp1b1.S	0.191	0.076	0.156	0.141	0.056	0.064	0.051	0.069	0.065	0.035	0.096	0.0965556	0.350785	-1.51134
gnl|gene4906|XL-9_2-gene4906|rna14328|	atp1b3.L	0.085	0.094	0.09	0.09	0.09	0.084	0.093	0.098	0.094	0.091	0.09	0.0908889	1.12941	0.175572
gnl|gene16064|XL-9_2-gene16064|rna46957|	atp1b3.S	0.075	0.083	0.086	0.075	0.088	0.087	0.103	0.112	0.103	0.093	0.094	0.0902222	1.43333	0.519374
gnl|gene8885|XL-9_2-gene8885|rna25863|	atp23.L	0.085	0.075	0.085	0.073	0.088	0.073	0.1	0.113	0.108	0.103	0.099	0.0888889	1.3	0.378512
gnl|gene48795|XL-9_2-gene48795|rna94539|	atp2a2.S	0.088	0.088	0.086	0.091	0.092	0.093	0.09	0.098	0.089	0.092	0.094	0.0905556	1.0625	0.0874628
gnl|gene37062|XL-9_2-gene37062|rna77670|	atp2a3.L	0.102	0.108	0.105	0.1	0.105	0.104	0.078	0.08	0.081	0.068	0.07	0.0958889	0.789216	-0.341508
gnl|gene14732|XL-9_2-gene14732|rna42940|	atp2a3.S	0.094	0.092	0.082	0.084	0.093	0.093	0.091	0.096	0.09	0.094	0.091	0.0905556	0.989362	-0.01543
gnl|gene2746|XL-9_2-gene2746|rna7995|	atp2b1.S	0.095	0.089	0.088	0.094	0.092	0.097	0.097	0.101	0.09	0.08	0.076	0.0936667	1.00526	0.00757322
gnl|gene45877|XL-9_2-gene45877|rna90432|	atp2b3.L	0.092	0.088	0.095	0.091	0.089	0.094	0.096	0.094	0.094	0.076	0.092	0.0925556	1.02174	0.0310269
gnl|gene44913|XL-9_2-gene44913|rna89035|	atp2c1.L	0.076	0.073	0.082	0.072	0.08	0.084	0.101	0.102	0.103	0.112	0.116	0.0858889	1.34868	0.431553
gnl|gene1225|XL-9_2-gene1225|rna3565|	atp5f1a.L	0.075	0.086	0.077	0.082	0.074	0.076	0.099	0.096	0.099	0.117	0.12	0.0848889	1.3	0.378512
gnl|gene16088|XL-9_2-gene16088|rna47032|	atp5f1a.S	0.094	0.092	0.095	0.09	0.094	0.094	0.093	0.093	0.094	0.078	0.082	0.0932222	0.994681	-0.00769439
gnl|gene19969|XL-9_2-gene19969|rna58291|	atp5f1b.L	0.083	0.093	0.088	0.093	0.086	0.09	0.091	0.09	0.099	0.093	0.093	0.0903333	1.13855	0.187203
gnl|gene13760|XL-9_2-gene13760|rna40032|	atp5f1b.S	0.083	0.087	0.082	0.081	0.088	0.091	0.101	0.101	0.096	0.098	0.091	0.09	1.18675	0.247012
gnl|gene17062|XL-9_2-gene17062|rna49841|	atp5f1c.L	0.073	0.071	0.078	0.069	0.069	0.071	0.079	0.077	0.067	0.176	0.169	0.0726667	0.986301	-0.0198996
gnl|gene10107|XL-9_2-gene10107|rna29389|	atp5f1c.S	0.091	0.09	0.09	0.09	0.091	0.083	0.097	0.085	0.106	0.083	0.095	0.0914444	1.04945	0.0696342
gnl|gene8152|XL-9_2-gene8152|rna23732|	atp5f1d.S	0.082	0.069	0.073	0.068	0.081	0.076	0.109	0.096	0.093	0.119	0.135	0.083	1.15244	0.20469
gnl|gene39457|XL-9_2-gene39457|rna81050|	atp5if1.L	0.076	0.11	0.081	0.143	0.082	0.084	0.073	0.071	0.141	0.073	0.067	0.0956667	1.39474	0.479993
gnl|gene10015|XL-9_2-gene10015|rna29109|	atp5if1.S	0.087	0.085	0.08	0.096	0.108	0.115	0.081	0.088	0.101	0.083	0.077	0.0934444	1.08621	0.119299
gnl|gene13561|XL-9_2-gene13561|rna39465|	atp5me.S	0.092	0.097	0.094	0.097	0.097	0.099	0.09	0.086	0.085	0.078	0.084	0.093	0.929348	-0.105709
gnl|gene15274|XL-9_2-gene15274|rna44575|	atp5mf.L	0.077	0.088	0.062	0.068	0.083	0.075	0.101	0.113	0.115	0.109	0.107	0.0868889	1.48052	0.566103
gnl|gene12631|XL-9_2-gene12631|rna36700|	atp5mf.S	0.08	0.091	0.088	0.073	0.081	0.08	0.104	0.107	0.106	0.094	0.098	0.09	1.33125	0.412782
gnl|gene9120|XL-9_2-gene9120|rna26524|	atp5mg.L	0.094	0.099	0.09	0.103	0.099	0.098	0.087	0.09	0.082	0.083	0.075	0.0935556	0.914894	-0.128324
gnl|gene20224|XL-9_2-gene20224|rna59033|	atp5mk.L	0.093	0.097	0.111	0.094	0.104	0.099	0.083	0.083	0.082	0.074	0.078	0.094	0.887097	-0.172837
gnl|gene898|XL-9_2-gene898|rna2638|	atp5pb.L	0.082	0.1	0.087	0.108	0.083	0.091	0.081	0.087	0.093	0.098	0.092	0.0902222	1.09756	0.134301
gnl|gene4531|XL-9_2-gene4531|rna13230|	atp5pb.S	0.088	0.089	0.081	0.091	0.096	0.096	0.09	0.091	0.094	0.091	0.093	0.0906667	1.05114	0.0719498
gnl|gene699|XL-9_2-gene699|rna2047|	atp5pd.L	0.066	0.077	0.09	0.068	0.063	0.069	0.117	0.129	0.116	0.105	0.101	0.0883333	1.85606	0.892244
gnl|gene6676|XL-9_2-gene6676|rna19542|	atp5pd.S	0.091	0.095	0.1	0.094	0.092	0.092	0.091	0.09	0.092	0.081	0.081	0.093	1	0
gnl|gene9366|XL-9_2-gene9366|rna27248|	atp5pf.L	0.096	0.12	0.114	0.141	0.088	0.074	0.07	0.062	0.104	0.06	0.071	0.0965556	0.864583	-0.209923
gnl|gene233|XL-9_2-gene233|rna658|	atp5po.L	0.089	0.106	0.09	0.108	0.088	0.091	0.085	0.086	0.099	0.082	0.075	0.0935556	1.03933	0.055648
gnl|gene16039|XL-9_2-gene16039|rna46882|	atp5po.S	0.092	0.088	0.088	0.084	0.086	0.081	0.097	0.094	0.088	0.102	0.099	0.0886667	0.98913	-0.0157673
gnl|gene16154|XL-9_2-gene16154|rna47217|	atp6ap1.2.L	0.085	0.109	0.092	0.137	0.109	0.094	0.08	0.083	0.073	0.064	0.074	0.0957778	0.917647	-0.123989
gnl|gene10045|XL-9_2-gene10045|rna29195|	atp6ap1.2.S	0.056	0.077	0.048	0.06	0.064	0.053	0.133	0.121	0.136	0.12	0.135	0.0831111	2.29464	1.19827
gnl|gene20125|XL-9_2-gene20125|rna58727|	atp6v0a1.S	0.075	0.077	0.071	0.071	0.079	0.076	0.107	0.1	0.103	0.113	0.128	0.0843333	1.35333	0.436517
gnl|gene43933|XL-9_2-gene43933|rna87595|	atp6v0a2.L	0.087	0.08	0.094	0.093	0.1	0.105	0.091	0.086	0.1	0.083	0.08	0.0928889	1.06897	0.0962153
gnl|gene122|XL-9_2-gene122|rna340|	atp6v0c.L	0.08	0.102	0.069	0.068	0.074	0.074	0.095	0.102	0.098	0.122	0.115	0.0846667	1.25	0.321928
gnl|gene17454|XL-9_2-gene17454|rna50978|	atp6v0d1.L	0.103	0.091	0.107	0.096	0.103	0.096	0.089	0.085	0.087	0.066	0.076	0.0952222	0.834951	-0.260236
gnl|gene13273|XL-9_2-gene13273|rna38629|	atp6v1a.L	0.065	0.057	0.075	0.07	0.059	0.066	0.116	0.106	0.087	0.153	0.145	0.0778889	1.48462	0.570089
gnl|gene4226|XL-9_2-gene4226|rna12299|	atp6v1a.S	0.097	0.094	0.097	0.094	0.091	0.091	0.094	0.09	0.084	0.083	0.085	0.0924444	0.896907	-0.156969
gnl|gene20453|XL-9_2-gene20453|rna59732|	atp6v1al.L	0.092	0.106	0.089	0.085	0.097	0.102	0.083	0.08	0.075	0.101	0.091	0.0898889	0.842391	-0.247438
gnl|gene19948|XL-9_2-gene19948|rna58236|	atp6v1b2.S	0.086	0.093	0.089	0.081	0.08	0.081	0.092	0.095	0.092	0.105	0.107	0.0876667	1.08721	0.12063
gnl|gene16486|XL-9_2-gene16486|rna48169|	atp6v1c1.L	0.095	0.092	0.103	0.098	0.098	0.102	0.093	0.089	0.085	0.073	0.071	0.095	0.915789	-0.126912
gnl|gene3844|XL-9_2-gene3844|rna11216|	atp6v1c1.S	0.076	0.086	0.067	0.075	0.072	0.08	0.109	0.118	0.101	0.114	0.101	0.0871111	1.44079	0.52686
gnl|gene2591|XL-9_2-gene2591|rna7527|	atp6v1d.L	0.088	0.098	0.084	0.096	0.09	0.094	0.09	0.097	0.092	0.087	0.084	0.0921111	1.07386	0.102811
gnl|gene5289|XL-9_2-gene5289|rna15482|	atp6v1d.S	0.084	0.079	0.069	0.062	0.08	0.065	0.114	0.099	0.115	0.114	0.119	0.0852222	1.27381	0.34915
gnl|gene6868|XL-9_2-gene6868|rna20074|	atp6v1e1.L	0.083	0.089	0.075	0.078	0.081	0.086	0.086	0.087	0.073	0.138	0.124	0.082	0.963855	-0.0531113
gnl|gene15464|XL-9_2-gene15464|rna45142|	atp6v1e1.S	0.1	0.091	0.082	0.09	0.078	0.096	0.104	0.087	0.094	0.097	0.08	0.0913333	0.905	-0.14401
gnl|gene10937|XL-9_2-gene10937|rna31787|	atp6v1g1.S	0.098	0.097	0.1	0.098	0.097	0.094	0.088	0.085	0.083	0.074	0.085	0.0933333	0.857143	-0.222392
gnl|gene7572|XL-9_2-gene7572|rna22061|	atp6v1h.L	0.088	0.099	0.088	0.092	0.09	0.089	0.086	0.092	0.082	0.099	0.094	0.0895556	0.988636	-0.0164881
gnl|gene18806|XL-9_2-gene18806|rna54893|	atp6v1h.S	0.088	0.086	0.097	0.092	0.104	0.111	0.09	0.086	0.088	0.08	0.077	0.0935556	0.988636	-0.0164881
gnl|gene14801|XL-9_2-gene14801|rna43186|	atp8a1.S	0.092	0.09	0.092	0.099	0.106	0.098	0.092	0.08	0.094	0.086	0.071	0.0936667	0.945652	-0.0806185
gnl|gene18048|XL-9_2-gene18048|rna52753|	atp8b1.L	0.075	0.075	0.094	0.095	0.097	0.106	0.093	0.099	0.102	0.087	0.077	0.0928889	1.34	0.422233
gnl|gene5339|XL-9_2-gene5339|rna15633|	atp8b1.S	0.067	0.072	0.09	0.086	0.09	0.106	0.097	0.107	0.103	0.097	0.086	0.0908889	1.56716	0.648156
gnl|gene16679|XL-9_2-gene16679|rna48732|	atp8b4.L	0.106	0.103	0.112	0.101	0.099	0.095	0.078	0.092	0.073	0.07	0.071	0.0954444	0.778302	-0.361598
gnl|gene3488|XL-9_2-gene3488|rna10154|	atp9b.L	0.081	0.094	0.088	0.106	0.093	0.085	0.084	0.092	0.113	0.082	0.083	0.0928889	1.26543	0.33963
gnl|gene15640|XL-9_2-gene15640|rna45660|	atpaf1.S	0.093	0.093	0.097	0.097	0.105	0.092	0.091	0.087	0.089	0.081	0.076	0.0937778	0.946237	-0.0797272
gnl|gene20369|XL-9_2-gene20369|rna59494|	atpaf2.L	0.089	0.082	0.096	0.09	0.092	0.095	0.093	0.087	0.081	0.1	0.095	0.0894444	0.94382	-0.083416
gnl|gene11929|XL-9_2-gene11929|rna34640|	atpaf2.S	0.091	0.084	0.097	0.089	0.099	0.085	0.089	0.105	0.096	0.081	0.083	0.0927778	1.1044	0.143257
gnl|gene45653|XL-9_2-gene45653|rna90142|	atr.L	0.089	0.083	0.09	0.089	0.103	0.099	0.097	0.091	0.096	0.084	0.08	0.093	1.05056	0.071161
gnl|gene1287|XL-9_2-gene1287|rna3737|	atrn.L	0.101	0.11	0.108	0.103	0.12	0.116	0.078	0.073	0.064	0.06	0.068	0.097	0.678218	-0.560179
gnl|gene3646|XL-9_2-gene3646|rna10603|	atrn.S	0.095	0.09	0.068	0.082	0.099	0.086	0.105	0.105	0.098	0.084	0.089	0.092	1.06842	0.0954803
gnl|gene42048|XL-9_2-gene42048|rna84769|	atrx.L	0.073	0.076	0.083	0.08	0.086	0.089	0.099	0.107	0.094	0.109	0.104	0.0874444	1.37671	0.461227
gnl|gene48715|XL-9_2-gene48715|rna94401|	atxn10.L	0.094	0.086	0.104	0.097	0.09	0.107	0.094	0.085	0.089	0.077	0.078	0.094	0.925532	-0.111645
gnl|gene42906|XL-9_2-gene42906|rna86041|	atxn2.L	0.08	0.08	0.098	0.09	0.101	0.103	0.091	0.085	0.095	0.094	0.084	0.0914444	1.125	0.169925
gnl|gene42372|XL-9_2-gene42372|rna85248|	atxn2.S	0.068	0.07	0.076	0.076	0.085	0.079	0.109	0.108	0.098	0.119	0.112	0.0854444	1.51471	0.599038
gnl|gene35359|XL-9_2-gene35359|rna75315|	atxn2l.L	0.087	0.08	0.1	0.095	0.103	0.102	0.1	0.09	0.093	0.079	0.073	0.0944444	1.05172	0.0727563
gnl|gene18842|XL-9_2-gene18842|rna54996|	atxn2l.S	0.08	0.08	0.089	0.094	0.096	0.097	0.096	0.099	0.094	0.092	0.083	0.0916667	1.20625	0.270529
gnl|gene4209|XL-9_2-gene4209|rna12247|	atxn3.L	0.086	0.087	0.087	0.099	0.095	0.116	0.083	0.097	0.094	0.088	0.067	0.0937778	1.11047	0.151164
gnl|gene15564|XL-9_2-gene15564|rna45449|	atxn3.S	0.094	0.091	0.092	0.096	0.087	0.088	0.097	0.101	0.087	0.081	0.086	0.0925556	1	0
gnl|gene10913|XL-9_2-gene10913|rna31726|	auh.L	0.085	0.082	0.094	0.086	0.087	0.088	0.102	0.094	0.098	0.093	0.091	0.0906667	1.12941	0.175572
gnl|gene19124|XL-9_2-gene19124|rna55851|	auh.S	0.081	0.068	0.068	0.061	0.069	0.054	0.108	0.105	0.099	0.152	0.136	0.0792222	1.25926	0.332575
gnl|gene13886|XL-9_2-gene13886|rna40435|	aup1.S	0.098	0.109	0.105	0.097	0.101	0.104	0.083	0.091	0.079	0.068	0.065	0.0963333	0.867347	-0.205319
gnl|gene6077|XL-9_2-gene6077|rna17778|	aurka.L	0.072	0.073	0.097	0.101	0.104	0.111	0.094	0.094	0.098	0.085	0.07	0.0937778	1.33333	0.415037
gnl|gene7723|XL-9_2-gene7723|rna22561|	aurka.S	0.062	0.065	0.078	0.077	0.094	0.097	0.093	0.102	0.118	0.12	0.094	0.0873333	1.77419	0.827163
gnl|gene9209|XL-9_2-gene9209|rna26747|	aurkb.L	0.102	0.088	0.108	0.104	0.115	0.129	0.073	0.074	0.08	0.064	0.064	0.097	0.754902	-0.405639
gnl|gene3757|XL-9_2-gene3757|rna10925|	aurkb.S	0.072	0.07	0.072	0.081	0.086	0.077	0.109	0.112	0.113	0.115	0.093	0.088	1.5625	0.643856
gnl|gene1597|XL-9_2-gene1597|rna4662|	avd.2.L	0.121	0.098	0.103	0.063	0.083	0.073	0.092	0.093	0.103	0.092	0.081	0.0921111	0.809917	-0.304153
gnl|gene45791|XL-9_2-gene45791|rna90329|	aven.L	0.083	0.082	0.069	0.07	0.086	0.084	0.096	0.101	0.102	0.109	0.118	0.0858889	1.22289	0.290296
gnl|gene43167|XL-9_2-gene43167|rna86436|	avl9.L	0.096	0.092	0.1	0.097	0.095	0.096	0.08	0.083	0.095	0.072	0.094	0.0926667	0.927083	-0.109229
gnl|gene43078|XL-9_2-gene43078|rna86283|	b3glct.L	0.094	0.071	0.091	0.093	0.099	0.085	0.093	0.097	0.11	0.088	0.079	0.0925556	1.10106	0.138898
gnl|gene18368|XL-9_2-gene18368|rna53659|	b3gnt2.L	0.075	0.067	0.07	0.084	0.091	0.083	0.113	0.098	0.119	0.099	0.103	0.0888889	1.44667	0.532733
gnl|gene13798|XL-9_2-gene13798|rna40167|	b4galnt1.L	0.089	0.097	0.087	0.093	0.102	0.099	0.091	0.09	0.09	0.079	0.084	0.0931111	1.01124	0.0161197
gnl|gene13067|XL-9_2-gene13067|rna37978|	babam1.L	0.101	0.08	0.108	0.087	0.108	0.092	0.088	0.081	0.095	0.077	0.081	0.0933333	0.871287	-0.19878
gnl|gene19679|XL-9_2-gene19679|rna57520|	babam2.L	0.096	0.103	0.083	0.091	0.092	0.097	0.088	0.09	0.087	0.085	0.088	0.0918889	0.921875	-0.117357
gnl|gene18644|XL-9_2-gene18644|rna54427|	bace2.L	0.087	0.106	0.091	0.101	0.096	0.12	0.081	0.093	0.074	0.08	0.069	0.0943333	0.95977	-0.0592392
gnl|gene3029|XL-9_2-gene3029|rna8781|	bace2.S	0.085	0.085	0.108	0.079	0.114	0.089	0.098	0.098	0.089	0.065	0.089	0.0938889	1.1	0.137504
gnl|gene43934|XL-9_2-gene43934|rna87596|	baf-l.L	0.085	0.092	0.093	0.104	0.083	0.108	0.097	0.099	0.09	0.089	0.06	0.0945556	1.11176	0.152851
gnl|gene1304|XL-9_2-gene1304|rna3804|	bag1.L	0.092	0.089	0.093	0.087	0.102	0.09	0.089	0.098	0.096	0.079	0.085	0.0928889	1.05435	0.0763509
gnl|gene1519|XL-9_2-gene1519|rna4416|	bag3.L	0.08	0.08	0.102	0.091	0.101	0.105	0.09	0.093	0.092	0.084	0.084	0.0926667	1.15625	0.209453
gnl|gene16808|XL-9_2-gene16808|rna49117|	bag4.S	0.1	0.095	0.099	0.094	0.101	0.1	0.091	0.082	0.085	0.075	0.079	0.0941111	0.835	-0.260152
gnl|gene5493|XL-9_2-gene5493|rna16087|	bag5.S	0.08	0.092	0.091	0.098	0.09	0.104	0.087	0.094	0.086	0.097	0.081	0.0913333	1.125	0.169925
gnl|gene4093|XL-9_2-gene4093|rna11918|	bag6.L	0.107	0.098	0.103	0.087	0.094	0.092	0.089	0.084	0.082	0.084	0.081	0.0928889	0.775701	-0.366428
gnl|gene3297|XL-9_2-gene3297|rna9558|	bag6.S	0.095	0.09	0.102	0.097	0.093	0.096	0.089	0.094	0.089	0.077	0.077	0.0938889	0.963158	-0.0541558
gnl|gene1865|XL-9_2-gene1865|rna5445|	baiap2.S	0.073	0.078	0.079	0.086	0.088	0.093	0.095	0.104	0.087	0.115	0.102	0.087	1.30822	0.387604
gnl|gene15666|XL-9_2-gene15666|rna45740|	baiap2l1.L	0.068	0.105	0.079	0.109	0.065	0.075	0.105	0.099	0.098	0.088	0.108	0.0892222	1.44853	0.534589
gnl|gene35815|XL-9_2-gene35815|rna75918|	bak1.S	0.091	0.085	0.086	0.097	0.083	0.108	0.096	0.092	0.093	0.083	0.086	0.0923333	1.01648	0.0235868
gnl|gene18792|XL-9_2-gene18792|rna54852|	banf1.L	0.085	0.08	0.088	0.083	0.106	0.092	0.093	0.075	0.094	0.107	0.097	0.0884444	0.994118	-0.0085115
gnl|gene8953|XL-9_2-gene8953|rna26073|	banf1.S	0.078	0.077	0.092	0.1	0.095	0.094	0.082	0.116	0.083	0.073	0.11	0.0907778	1.27564	0.351222
gnl|gene3011|XL-9_2-gene3011|rna8722|	banp.L	0.09	0.096	0.095	0.093	0.104	0.099	0.098	0.094	0.082	0.081	0.067	0.0945556	0.977778	-0.0324215
gnl|gene39869|XL-9_2-gene39869|rna81639|	banp.S	0.093	0.094	0.113	0.107	0.101	0.113	0.084	0.084	0.078	0.069	0.066	0.0963333	0.870968	-0.199309
gnl|gene6209|XL-9_2-gene6209|rna18135|	bap1.L	0.099	0.098	0.096	0.1	0.102	0.101	0.094	0.099	0.091	0.047	0.072	0.0977778	0.959596	-0.059501
gnl|gene10521|XL-9_2-gene10521|rna30567|	bard1.L	0.105	0.11	0.133	0.118	0.093	0.082	0.083	0.068	0.068	0.066	0.074	0.0955556	0.647619	-0.626783
gnl|gene50867|XL-9_2-gene50867|rna97549|	barx2.L	0.108	0.093	0.096	0.102	0.102	0.098	0.082	0.082	0.086	0.068	0.083	0.0943333	0.777778	-0.36257
gnl|gene16437|XL-9_2-gene16437|rna48006|	bax.S	0.098	0.096	0.097	0.098	0.092	0.1	0.088	0.088	0.085	0.084	0.075	0.0935556	0.882653	-0.180082
gnl|gene9976|XL-9_2-gene9976|rna29004|	baz1a.L	0.109	0.108	0.095	0.09	0.092	0.091	0.088	0.087	0.087	0.071	0.08	0.0941111	0.798165	-0.325241
gnl|gene12251|XL-9_2-gene12251|rna35610|	baz1a.S	0.111	0.076	0.093	0.089	0.099	0.095	0.093	0.094	0.091	0.07	0.088	0.0934444	0.833333	-0.263034
gnl|gene8976|XL-9_2-gene8976|rna26139|	baz1b.L	0.096	0.099	0.097	0.095	0.098	0.098	0.088	0.084	0.086	0.081	0.079	0.0934444	0.885417	-0.175572
gnl|gene40207|XL-9_2-gene40207|rna82105|	baz1b.S	0.093	0.102	0.101	0.098	0.103	0.103	0.086	0.079	0.076	0.078	0.082	0.0934444	0.833333	-0.263034
gnl|gene11235|XL-9_2-gene11235|rna32672|	baz2a.L	0.095	0.097	0.09	0.084	0.089	0.09	0.094	0.09	0.095	0.09	0.087	0.0915556	0.973684	-0.0384741
gnl|gene1669|XL-9_2-gene1669|rna4862|	bbs2.S	0.089	0.087	0.093	0.09	0.097	0.101	0.091	0.086	0.092	0.083	0.091	0.0917778	1	0
gnl|gene8491|XL-9_2-gene8491|rna24719|	bbs7.L	0.092	0.088	0.09	0.103	0.095	0.097	0.09	0.096	0.09	0.079	0.08	0.0934444	1.01087	0.0155969
gnl|gene3631|XL-9_2-gene3631|rna10560|	bbs9.L	0.062	0.071	0.069	0.076	0.065	0.075	0.104	0.124	0.117	0.128	0.11	0.0847778	1.94355	0.958693
gnl|gene36375|XL-9_2-gene36375|rna76678|	bcam.S	0.206	0.061	0.176	0.123	0.058	0.071	0.051	0.032	0.062	0.046	0.114	0.0933333	0.228155	-2.13191
gnl|gene2274|XL-9_2-gene2274|rna6610|	bcap29.L	0.109	0.092	0.12	0.087	0.104	0.091	0.09	0.078	0.084	0.067	0.078	0.095	0.743119	-0.428334
gnl|gene11433|XL-9_2-gene11433|rna33239|	bcap29.S	0.101	0.076	0.114	0.094	0.103	0.092	0.107	0.077	0.093	0.063	0.079	0.0952222	0.841584	-0.248821
gnl|gene5630|XL-9_2-gene5630|rna16483|	bcap31.L	0.087	0.111	0.097	0.126	0.083	0.092	0.085	0.09	0.099	0.072	0.058	0.0966667	1.08621	0.119299
gnl|gene18896|XL-9_2-gene18896|rna55153|	bcas2.L	0.094	0.09	0.086	0.077	0.096	0.091	0.089	0.097	0.1	0.087	0.093	0.0911111	1.04787	0.067463
gnl|gene41034|XL-9_2-gene41034|rna83303|	bcas3.L	0.088	0.081	0.084	0.112	0.105	0.1	0.081	0.093	0.084	0.092	0.079	0.092	1.00568	0.00817393
gnl|gene14344|XL-9_2-gene14344|rna41782|	bcat2.L	0.072	0.087	0.078	0.097	0.077	0.072	0.105	0.101	0.108	0.098	0.107	0.0885556	1.45139	0.537434
gnl|gene5964|XL-9_2-gene5964|rna17444|	bccip.L	0.096	0.096	0.101	0.095	0.097	0.093	0.092	0.086	0.089	0.075	0.081	0.0938889	0.911458	-0.133751
gnl|gene19353|XL-9_2-gene19353|rna56548|	bccip.S	0.095	0.114	0.107	0.101	0.101	0.089	0.084	0.088	0.087	0.063	0.071	0.0962222	0.921053	-0.118644
gnl|gene14100|XL-9_2-gene14100|rna41068|	bckdha.L	0.07	0.076	0.068	0.068	0.076	0.068	0.107	0.106	0.109	0.123	0.129	0.0831111	1.53571	0.61891
gnl|gene7805|XL-9_2-gene7805|rna22778|	bckdhb.L	0.09	0.09	0.097	0.084	0.128	0.098	0.084	0.083	0.093	0.069	0.083	0.0941111	0.977778	-0.0324215
gnl|gene9170|XL-9_2-gene9170|rna26651|	bckdhb.S	0.097	0.094	0.096	0.085	0.092	0.089	0.097	0.093	0.095	0.079	0.082	0.0931111	0.969072	-0.045324
gnl|gene47042|XL-9_2-gene47042|rna92042|	bckdk.L	0.089	0.088	0.069	0.077	0.097	0.091	0.106	0.101	0.083	0.116	0.083	0.089	1.03371	0.0478285
gnl|gene8176|XL-9_2-gene8176|rna23810|	bcl2l13.L	0.074	0.055	0.064	0.066	0.087	0.078	0.106	0.101	0.115	0.121	0.132	0.0828889	1.45946	0.545434
gnl|gene18426|XL-9_2-gene18426|rna53822|	bcl2l14.S	0.098	0.087	0.105	0.09	0.102	0.105	0.094	0.079	0.089	0.068	0.083	0.0943333	0.857143	-0.222392
gnl|gene8328|XL-9_2-gene8328|rna24242|	bcl7a.S	0.088	0.079	0.083	0.129	0.108	0.106	0.075	0.089	0.086	0.089	0.066	0.0936667	0.994318	-0.00822051
gnl|gene10447|XL-9_2-gene10447|rna30360|	bcl9.S	0.096	0.097	0.086	0.085	0.092	0.094	0.092	0.103	0.095	0.082	0.078	0.0933333	1.03125	0.0443941
gnl|gene17650|XL-9_2-gene17650|rna51575|	bcl9l.L	0.102	0.086	0.121	0.072	0.102	0.105	0.071	0.093	0.086	0.088	0.075	0.0931111	0.877451	-0.18861
gnl|gene8627|XL-9_2-gene8627|rna25120|	bco2.L	0.093	0.092	0.089	0.088	0.093	0.089	0.095	0.095	0.097	0.083	0.086	0.0923333	1.03226	0.0458037
gnl|gene11063|XL-9_2-gene11063|rna32167|	bcs1l.L	0.088	0.081	0.083	0.085	0.095	0.075	0.11	0.085	0.099	0.092	0.105	0.089	1.04545	0.0641303
gnl|gene10659|XL-9_2-gene10659|rna30975|	bdh1.L	0.094	0.087	0.094	0.093	0.1	0.096	0.092	0.09	0.094	0.078	0.081	0.0933333	0.978723	-0.0310269
gnl|gene19599|XL-9_2-gene19599|rna57270|	bdh2.L	0.099	0.094	0.102	0.096	0.098	0.096	0.092	0.088	0.084	0.074	0.078	0.0943333	0.868687	-0.203092
gnl|gene2884|XL-9_2-gene2884|rna8376|	bdp1.L	0.06	0.066	0.076	0.053	0.057	0.042	0.12	0.122	0.145	0.127	0.131	0.0823333	2.225	1.15381
gnl|gene17549|XL-9_2-gene17549|rna51263|	bdp1.S	0.097	0.09	0.108	0.102	0.105	0.118	0.079	0.059	0.077	0.087	0.076	0.0927778	0.701031	-0.51245
gnl|gene8173|XL-9_2-gene8173|rna23799|	best2.S	0.081	0.088	0.098	0.1	0.107	0.113	0.073	0.082	0.093	0.083	0.083	0.0927778	1.08025	0.111361
gnl|gene3644|XL-9_2-gene3644|rna10595|	bet1.S	0.095	0.092	0.07	0.095	0.082	0.083	0.094	0.097	0.088	0.096	0.107	0.0884444	0.973684	-0.0384741
gnl|gene46219|XL-9_2-gene46219|rna90891|	bfsp2.S	0.087	0.099	0.103	0.094	0.079	0.102	0.098	0.099	0.087	0.08	0.073	0.0942222	1.06897	0.0962153
gnl|gene16735|XL-9_2-gene16735|rna48904|	bhmt.L	0.088	0.095	0.087	0.077	0.082	0.08	0.086	0.088	0.1	0.103	0.114	0.087	1.06818	0.0951572
gnl|gene2612|XL-9_2-gene2612|rna7586|	bicc1.L	0.056	0.053	0.07	0.075	0.105	0.094	0.101	0.117	0.129	0.116	0.083	0.0888889	2.19643	1.13516
gnl|gene4425|XL-9_2-gene4425|rna12900|	bin1.S	0.093	0.087	0.098	0.096	0.098	0.103	0.092	0.077	0.096	0.076	0.083	0.0933333	0.930108	-0.104531
gnl|gene2607|XL-9_2-gene2607|rna7570|	birc5.L	0.044	0.047	0.053	0.056	0.085	0.101	0.113	0.145	0.139	0.136	0.082	0.087	3.22727	1.69032
gnl|gene35046|XL-9_2-gene35046|rna74826|	birc6.L	0.088	0.122	0.099	0.091	0.104	0.146	0.095	0.059	0.064	0.059	0.072	0.0964444	0.698864	-0.516917
gnl|gene2350|XL-9_2-gene2350|rna6838|	birc6.S	0.092	0.087	0.091	0.097	0.099	0.1	0.087	0.088	0.088	0.083	0.088	0.0921111	0.956522	-0.0641303
gnl|gene7521|XL-9_2-gene7521|rna21923|	birc7.L	0.112	0.101	0.116	0.098	0.1	0.084	0.087	0.091	0.078	0.07	0.063	0.0963333	0.754464	-0.406475
gnl|gene9511|XL-9_2-gene9511|rna27660|	birc7.S	0.095	0.105	0.093	0.074	0.1	0.106	0.092	0.08	0.081	0.09	0.085	0.0917778	0.847368	-0.238939
gnl|gene13216|XL-9_2-gene13216|rna38469|	blm.L	0.084	0.085	0.101	0.097	0.099	0.107	0.09	0.085	0.091	0.08	0.08	0.0932222	1.04762	0.0671142
gnl|gene15667|XL-9_2-gene15667|rna45744|	blm.S	0.094	0.092	0.098	0.096	0.104	0.097	0.09	0.094	0.081	0.076	0.077	0.094	0.930851	-0.103378
gnl|gene44799|XL-9_2-gene44799|rna88878|	blmh.S	0.073	0.061	0.075	0.072	0.074	0.077	0.115	0.111	0.117	0.112	0.114	0.0861111	1.56164	0.643065
gnl|gene51022|XL-9_2-gene51022|rna97762|	blnk.L	0.162	0.133	0.153	0.094	0.106	0.085	0.043	0.042	0.046	0.05	0.085	0.096	0.271605	-1.88042
gnl|gene16703|XL-9_2-gene16703|rna48824|	bloc1s3.L	0.09	0.087	0.102	0.1	0.102	0.111	0.079	0.077	0.088	0.087	0.076	0.0928889	0.916667	-0.125531
gnl|gene4427|XL-9_2-gene4427|rna12913|	blvra.L	0.098	0.088	0.099	0.083	0.084	0.095	0.088	0.091	0.088	0.091	0.096	0.0904444	0.913265	-0.130894
gnl|gene17976|XL-9_2-gene17976|rna52545|	bmi1.S	0.085	0.086	0.09	0.089	0.092	0.087	0.096	0.1	0.096	0.094	0.086	0.0912222	1.15294	0.205319
gnl|gene15366|XL-9_2-gene15366|rna44846|	bmp1.S	0.09	0.094	0.11	0.097	0.107	0.087	0.104	0.084	0.082	0.083	0.06	0.095	0.922222	-0.116814
gnl|gene50783|XL-9_2-gene50783|rna97436|	bms1.L	0.095	0.092	0.087	0.079	0.09	0.082	0.091	0.096	0.102	0.083	0.103	0.0904444	1.04211	0.059501
gnl|gene15709|XL-9_2-gene15709|rna45867|	bmt2.L	0.082	0.107	0.07	0.101	0.115	0.096	0.08	0.093	0.092	0.089	0.073	0.0928889	1.12805	0.173829
gnl|gene9679|XL-9_2-gene9679|rna28162|	bnip1.L	0.083	0.094	0.094	0.097	0.097	0.098	0.093	0.094	0.085	0.088	0.078	0.0927778	1.07831	0.108776
gnl|gene82|XL-9_2-gene82|rna230|	bod1.L	0.151	0.146	0.141	0.084	0.071	0.072	0.079	0.08	0.059	0.053	0.064	0.0981111	0.460265	-1.11946
gnl|gene13802|XL-9_2-gene13802|rna40184|	bod1l1.L	0.087	0.084	0.103	0.095	0.097	0.093	0.092	0.093	0.087	0.082	0.087	0.0923333	1.03448	0.0489096
gnl|gene7538|XL-9_2-gene7538|rna21971|	bola1.L	0.099	0.083	0.102	0.103	0.128	0.114	0.082	0.081	0.083	0.055	0.069	0.0972222	0.828283	-0.271805
gnl|gene12853|XL-9_2-gene12853|rna37365|	bola2.L	0.103	0.088	0.106	0.098	0.098	0.096	0.094	0.084	0.088	0.071	0.075	0.095	0.834951	-0.260236
gnl|gene19890|XL-9_2-gene19890|rna58079|	bola3.S	0.076	0.074	0.08	0.078	0.08	0.073	0.096	0.081	0.085	0.13	0.148	0.0803333	1.09211	0.127112
gnl|gene39674|XL-9_2-gene39674|rna81341|	bop1.L	0.089	0.086	0.096	0.099	0.097	0.1	0.092	0.089	0.085	0.084	0.083	0.0925556	0.977528	-0.0327899
gnl|gene1470|XL-9_2-gene1470|rna4282|	bora.S	0.097	0.098	0.082	0.083	0.09	0.085	0.089	0.088	0.093	0.09	0.105	0.0894444	0.93299	-0.100067
gnl|gene18462|XL-9_2-gene18462|rna53916|	borcs5.L	0.092	0.094	0.105	0.099	0.098	0.099	0.092	0.089	0.083	0.079	0.072	0.0945556	0.934783	-0.0972972
gnl|gene12139|XL-9_2-gene12139|rna35280|	borcs8.S	0.057	0.058	0.061	0.048	0.067	0.049	0.138	0.131	0.142	0.125	0.122	0.0834444	2.39474	1.25987
gnl|gene13275|XL-9_2-gene13275|rna38636|	bphl.L	0.098	0.089	0.092	0.083	0.099	0.093	0.087	0.087	0.095	0.083	0.093	0.0914444	0.928571	-0.106915
gnl|gene12435|XL-9_2-gene12435|rna36152|	bpnt1.L	0.101	0.101	0.101	0.092	0.096	0.089	0.093	0.087	0.088	0.073	0.078	0.0942222	0.866337	-0.207
gnl|gene3935|XL-9_2-gene3935|rna11474|	bpnt2.L	0.089	0.103	0.102	0.107	0.097	0.104	0.079	0.093	0.078	0.08	0.067	0.0946667	0.960674	-0.0578809
gnl|gene6084|XL-9_2-gene6084|rna17801|	bpnt2.S	0.079	0.039	0.052	0.052	0.052	0.054	0.125	0.121	0.111	0.144	0.172	0.0761111	1.46835	0.5542
gnl|gene38949|XL-9_2-gene38949|rna80352|	bptf.L	0.105	0.1	0.101	0.101	0.095	0.101	0.086	0.082	0.079	0.073	0.076	0.0944444	0.766667	-0.383329
gnl|gene50851|XL-9_2-gene50851|rna97527|	bptf.S	0.094	0.091	0.098	0.094	0.095	0.096	0.091	0.088	0.089	0.08	0.084	0.0928889	0.941489	-0.0869833
gnl|gene20156|XL-9_2-gene20156|rna58817|	braf.L	0.097	0.084	0.107	0.092	0.102	0.102	0.086	0.082	0.096	0.071	0.081	0.0942222	0.917526	-0.124179
gnl|gene12377|XL-9_2-gene12377|rna35988|	braf.S	0.089	0.095	0.087	0.091	0.093	0.104	0.082	0.094	0.084	0.094	0.086	0.091	1	0
gnl|gene12491|XL-9_2-gene12491|rna36320|	brap.L	0.081	0.089	0.075	0.081	0.085	0.089	0.093	0.101	0.09	0.108	0.109	0.0871111	1.17901	0.237579
gnl|gene10671|XL-9_2-gene10671|rna31002|	brap.S	0.099	0.073	0.093	0.109	0.093	0.095	0.104	0.091	0.085	0.074	0.084	0.0935556	0.888889	-0.169925
gnl|gene20299|XL-9_2-gene20299|rna59277|	brat1.L	0.073	0.072	0.074	0.063	0.063	0.065	0.089	0.088	0.082	0.166	0.164	0.0743333	1.16438	0.219566
gnl|gene6724|XL-9_2-gene6724|rna19687|	brca1.L	0.111	0.114	0.117	0.113	0.102	0.094	0.073	0.061	0.072	0.067	0.077	0.0952222	0.599099	-0.739133
gnl|gene48247|XL-9_2-gene48247|rna93765|	brca2.L	0.101	0.105	0.103	0.094	0.106	0.11	0.081	0.079	0.086	0.066	0.071	0.0961111	0.816832	-0.291889
gnl|gene42903|XL-9_2-gene42903|rna86032|	brd2.S	0.116	0.068	0.077	0.113	0.101	0.104	0.085	0.099	0.078	0.074	0.084	0.0934444	0.762931	-0.390375
gnl|gene12898|XL-9_2-gene12898|rna37476|	brd4.L	0.102	0.089	0.069	0.065	0.087	0.097	0.096	0.094	0.106	0.112	0.081	0.0894444	0.980392	-0.0285692
gnl|gene11939|XL-9_2-gene11939|rna34670|	brd4.S	0.084	0.081	0.09	0.09	0.098	0.109	0.093	0.086	0.096	0.091	0.083	0.0918889	1.08333	0.115477
gnl|gene8414|XL-9_2-gene8414|rna24497|	brd7.L	0.078	0.087	0.086	0.087	0.105	0.095	0.098	0.1	0.093	0.087	0.084	0.0921111	1.23718	0.307055
gnl|gene13586|XL-9_2-gene13586|rna39539|	brf1.L	0.108	0.106	0.117	0.086	0.09	0.087	0.085	0.086	0.083	0.073	0.08	0.0942222	0.782407	-0.354008
gnl|gene8245|XL-9_2-gene8245|rna24006|	bri3bp.S	0.084	0.075	0.069	0.068	0.066	0.08	0.104	0.106	0.117	0.106	0.125	0.0854444	1.32738	0.408582
gnl|gene10837|XL-9_2-gene10837|rna31496|	brip1.L	0.077	0.08	0.088	0.086	0.092	0.1	0.101	0.101	0.102	0.094	0.079	0.0918889	1.31818	0.398549
gnl|gene11899|XL-9_2-gene11899|rna34553|	brix1.S	0.158	0.131	0.132	0.112	0.095	0.087	0.073	0.052	0.044	0.042	0.075	0.0982222	0.303797	-1.71882
gnl|gene8391|XL-9_2-gene8391|rna24431|	brms1l.L	0.079	0.07	0.089	0.079	0.096	0.123	0.092	0.106	0.1	0.105	0.061	0.0926667	1.3038	0.38272
gnl|gene10646|XL-9_2-gene10646|rna30937|	brox.S	0.089	0.091	0.074	0.076	0.099	0.088	0.092	0.093	0.091	0.097	0.109	0.0881111	1.03371	0.0478285
gnl|gene18500|XL-9_2-gene18500|rna54009|	bsdc1.L	0.091	0.095	0.1	0.088	0.099	0.107	0.091	0.089	0.087	0.076	0.077	0.0941111	0.967033	-0.048363
gnl|gene43172|XL-9_2-gene43172|rna86441|	bsdc1.S	0.103	0.098	0.104	0.088	0.104	0.105	0.1	0.085	0.08	0.066	0.067	0.0963333	0.800971	-0.320178
gnl|gene8876|XL-9_2-gene8876|rna25838|	bsg.L	0.107	0.094	0.12	0.094	0.098	0.08	0.094	0.075	0.08	0.077	0.082	0.0935556	0.724299	-0.465343
gnl|gene13151|XL-9_2-gene13151|rna38223|	bsn.S	0.106	0.107	0.117	0.099	0.108	0.089	0.092	0.08	0.069	0.069	0.062	0.0963333	0.70283	-0.508752
gnl|gene1140|XL-9_2-gene1140|rna3306|	btaf1.L	0.086	0.094	0.09	0.097	0.095	0.095	0.093	0.088	0.091	0.085	0.087	0.0921111	1.0407	0.057551
gnl|gene15125|XL-9_2-gene15125|rna44150|	btbd10.L	0.07	0.071	0.097	0.093	0.106	0.099	0.098	0.092	0.098	0.095	0.082	0.0915556	1.35714	0.440573
gnl|gene17320|XL-9_2-gene17320|rna50553|	btbd19.S	0.089	0.111	0.087	0.095	0.081	0.1	0.087	0.106	0.082	0.082	0.079	0.0931111	1.05618	0.0788554
gnl|gene45453|XL-9_2-gene45453|rna89822|	btbd2.S	0.085	0.085	0.099	0.076	0.082	0.072	0.096	0.099	0.152	0.072	0.081	0.094	1.47647	0.562153
gnl|gene9692|XL-9_2-gene9692|rna28198|	btbd8.L	0.104	0.087	0.113	0.106	0.103	0.095	0.08	0.086	0.083	0.076	0.067	0.0952222	0.8125	-0.29956
gnl|gene15082|XL-9_2-gene15082|rna44007|	btbd9.S	0.084	0.101	0.089	0.08	0.068	0.107	0.113	0.096	0.09	0.091	0.081	0.092	1.10714	0.146841
gnl|gene43754|XL-9_2-gene43754|rna87295|	btd.L	0.077	0.079	0.076	0.09	0.093	0.091	0.105	0.092	0.102	0.094	0.1	0.0894444	1.25974	0.333126
gnl|gene11599|XL-9_2-gene11599|rna33690|	btf3l4.S	0.084	0.077	0.071	0.073	0.084	0.075	0.098	0.099	0.089	0.124	0.127	0.0833333	1.11905	0.162271
gnl|gene14351|XL-9_2-gene14351|rna41802|	btg4.S	0.018	0.025	0.047	0.058	0.115	0.121	0.139	0.146	0.148	0.117	0.065	0.0907778	8.16667	3.02975
gnl|gene17483|XL-9_2-gene17483|rna51055|	btrc.L	0.095	0.083	0.09	0.097	0.092	0.096	0.098	0.094	0.105	0.075	0.076	0.0944444	1.04737	0.066769
gnl|gene4909|XL-9_2-gene4909|rna14338|	bub1.L	0.081	0.075	0.099	0.083	0.107	0.102	0.097	0.093	0.101	0.086	0.077	0.0931111	1.19753	0.260063
gnl|gene35951|XL-9_2-gene35951|rna76090|	bub1b.L	0.093	0.089	0.09	0.094	0.101	0.098	0.088	0.094	0.086	0.083	0.084	0.0925556	0.967742	-0.0473057
gnl|gene9443|XL-9_2-gene9443|rna27470|	bub3.L	0.083	0.092	0.094	0.109	0.106	0.112	0.087	0.1	0.08	0.068	0.068	0.0958889	1.08434	0.116814
gnl|gene37359|XL-9_2-gene37359|rna78062|	bud13.L	0.071	0.051	0.095	0.089	0.108	0.121	0.093	0.089	0.111	0.104	0.069	0.092	1.40845	0.494109
gnl|gene18169|XL-9_2-gene18169|rna53094|	bysl.S	0.093	0.092	0.085	0.089	0.092	0.094	0.099	0.092	0.093	0.084	0.087	0.0921111	0.994624	-0.00777735
gnl|gene5707|XL-9_2-gene5707|rna16715|	bzw1.L	0.097	0.098	0.091	0.096	0.093	0.097	0.096	0.096	0.084	0.077	0.075	0.0942222	0.927835	-0.10806
gnl|gene11859|XL-9_2-gene11859|rna34454|	bzw1.S	0.068	0.112	0.067	0.122	0.077	0.118	0.091	0.121	0.069	0.09	0.065	0.0938889	1.39706	0.482393
gnl|gene2848|XL-9_2-gene2848|rna8267|	c10orf88.L	0.1	0.083	0.103	0.093	0.091	0.099	0.086	0.101	0.096	0.076	0.071	0.0946667	0.985	-0.0218044
gnl|gene12451|XL-9_2-gene12451|rna36194|	c11orf49.L	0.074	0.078	0.101	0.119	0.093	0.1	0.116	0.095	0.084	0.07	0.071	0.0955556	1.20946	0.274362
gnl|gene20512|XL-9_2-gene20512|rna59890|	c11orf54.L	0.085	0.081	0.087	0.085	0.088	0.08	0.1	0.103	0.103	0.09	0.098	0.0902222	1.21176	0.27711
gnl|gene15353|XL-9_2-gene15353|rna44811|	c11orf58.L	0.109	0.108	0.091	0.112	0.103	0.114	0.077	0.089	0.068	0.073	0.056	0.0967778	0.720183	-0.473564
gnl|gene12012|XL-9_2-gene12012|rna34902|	c11orf68.L	0.076	0.087	0.084	0.074	0.082	0.081	0.106	0.102	0.094	0.112	0.103	0.0873333	1.28947	0.366782
gnl|gene47544|XL-9_2-gene47544|rna92720|	c12orf4.L	0.094	0.101	0.109	0.094	0.089	0.107	0.08	0.077	0.094	0.067	0.088	0.0938889	0.909574	-0.136736
gnl|gene9940|XL-9_2-gene9940|rna28891|	c12orf45.S	0.099	0.09	0.098	0.099	0.12	0.099	0.086	0.084	0.077	0.067	0.082	0.0946667	0.813131	-0.29844
gnl|gene46393|XL-9_2-gene46393|rna91127|	c12orf57.L	0.1	0.097	0.076	0.076	0.112	0.097	0.101	0.102	0.081	0.072	0.086	0.0935556	0.915	-0.128156
gnl|gene2934|XL-9_2-gene2934|rna8501|	c14orf119.L	0.09	0.093	0.087	0.086	0.093	0.102	0.093	0.097	0.096	0.082	0.081	0.093	1.07222	0.100604
gnl|gene13356|XL-9_2-gene13356|rna38857|	c16orf71.L	0.095	0.082	0.088	0.086	0.099	0.105	0.089	0.092	0.093	0.088	0.082	0.0921111	0.973684	-0.0384741
gnl|gene4522|XL-9_2-gene4522|rna13206|	c16orf91.L	0.094	0.081	0.104	0.099	0.103	0.104	0.086	0.067	0.078	0.097	0.087	0.0906667	0.771277	-0.37468
gnl|gene12051|XL-9_2-gene12051|rna35008|	c17orf49.L	0.085	0.081	0.076	0.08	0.085	0.079	0.101	0.113	0.101	0.102	0.098	0.089	1.25882	0.332076
gnl|gene19963|XL-9_2-gene19963|rna58276|	c18orf25.L	0.091	0.097	0.09	0.108	0.086	0.112	0.087	0.084	0.085	0.091	0.07	0.0933333	0.928571	-0.106915
gnl|gene18415|XL-9_2-gene18415|rna53793|	c18orf25.S	0.088	0.103	0.094	0.107	0.101	0.108	0.082	0.078	0.085	0.071	0.083	0.094	0.926136	-0.110703
gnl|gene10452|XL-9_2-gene10452|rna30370|	c1galt1.S	0.089	0.091	0.082	0.087	0.1	0.109	0.085	0.081	0.084	0.092	0.1	0.0897778	0.926966	-0.109411
gnl|gene4211|XL-9_2-gene4211|rna12256|	c1galt1c1.L	0.095	0.074	0.09	0.106	0.095	0.094	0.092	0.086	0.096	0.089	0.082	0.092	0.957895	-0.062061
gnl|gene6686|XL-9_2-gene6686|rna19568|	c1orf112.L	0.085	0.081	0.084	0.081	0.093	0.107	0.085	0.094	0.098	0.091	0.101	0.0897778	1.12941	0.175572
gnl|gene18885|XL-9_2-gene18885|rna55120|	c1orf116.L	0.076	0.08	0.086	0.092	0.097	0.105	0.087	0.093	0.103	0.096	0.086	0.091	1.28947	0.366782
gnl|gene9142|XL-9_2-gene9142|rna26577|	c1orf131.L	0.104	0.119	0.102	0.09	0.091	0.097	0.081	0.079	0.085	0.08	0.073	0.0942222	0.788462	-0.342888
gnl|gene19232|XL-9_2-gene19232|rna56193|	c1orf50.L	0.085	0.075	0.076	0.08	0.095	0.08	0.088	0.103	0.097	0.121	0.099	0.0865556	1.17647	0.234465
gnl|gene42511|XL-9_2-gene42511|rna85451|	c1orf52.L	0.087	0.09	0.077	0.083	0.095	0.092	0.087	0.095	0.09	0.09	0.114	0.0884444	1.06322	0.088438
gnl|gene12063|XL-9_2-gene12063|rna35042|	c1orf84.L	0.103	0.08	0.109	0.099	0.088	0.102	0.095	0.079	0.086	0.084	0.076	0.0934444	0.800971	-0.320178
gnl|gene10723|XL-9_2-gene10723|rna31169|	c1qbp.L	0.083	0.082	0.073	0.084	0.083	0.078	0.103	0.111	0.095	0.104	0.104	0.088	1.24096	0.311461
gnl|gene3623|XL-9_2-gene3623|rna10538|	c1qbp.S	0.066	0.065	0.058	0.06	0.066	0.062	0.113	0.124	0.115	0.132	0.138	0.081	1.81061	0.856473
gnl|gene10179|XL-9_2-gene10179|rna29596|	c1qtnf4.L	0.079	0.067	0.07	0.091	0.088	0.09	0.099	0.114	0.112	0.094	0.096	0.09	1.43038	0.516398
gnl|gene48070|XL-9_2-gene48070|rna93490|	c1r.L	0.098	0.093	0.087	0.098	0.097	0.096	0.085	0.086	0.093	0.082	0.084	0.0925556	0.913265	-0.130894
gnl|gene16622|XL-9_2-gene16622|rna48561|	c20orf194.S	0.081	0.094	0.088	0.076	0.066	0.069	0.106	0.111	0.112	0.099	0.099	0.0892222	1.37654	0.46105
gnl|gene16657|XL-9_2-gene16657|rna48668|	c22orf39.L	0.097	0.076	0.101	0.088	0.091	0.094	0.094	0.089	0.088	0.087	0.094	0.0908889	0.912371	-0.132307
gnl|gene893|XL-9_2-gene893|rna2622|	c2cd2l.L	0.084	0.091	0.073	0.086	0.091	0.08	0.1	0.1	0.1	0.099	0.096	0.0894444	1.19048	0.251539
gnl|gene49794|XL-9_2-gene49794|rna95931|	c2cd5.L	0.109	0.078	0.09	0.088	0.086	0.083	0.095	0.091	0.093	0.086	0.101	0.0903333	0.844037	-0.244622
gnl|gene17967|XL-9_2-gene17967|rna52519|	c2orf49.L	0.092	0.094	0.081	0.085	0.098	0.095	0.097	0.095	0.088	0.086	0.089	0.0916667	0.994565	-0.00786212
gnl|gene12308|XL-9_2-gene12308|rna35776|	c2orf69.S	0.093	0.1	0.086	0.068	0.087	0.086	0.102	0.11	0.091	0.09	0.087	0.0914444	1.08065	0.111893
gnl|gene16821|XL-9_2-gene16821|rna49163|	c2orf76.L	0.096	0.104	0.09	0.088	0.102	0.081	0.075	0.064	0.087	0.097	0.116	0.0874444	0.786458	-0.346558
gnl|gene7154|XL-9_2-gene7154|rna20881|	c3.L	0.104	0.101	0.105	0.095	0.096	0.092	0.088	0.083	0.087	0.07	0.077	0.0945556	0.817308	-0.291049
gnl|gene19466|XL-9_2-gene19466|rna56899|	c3orf33.L	0.119	0.094	0.094	0.09	0.105	0.097	0.082	0.086	0.077	0.077	0.079	0.0937778	0.684874	-0.54609
gnl|gene7917|XL-9_2-gene7917|rna23097|	c4a.L	0.101	0.096	0.103	0.094	0.097	0.097	0.09	0.089	0.086	0.071	0.076	0.0947778	0.866337	-0.207
gnl|gene3991|XL-9_2-gene3991|rna11604|	c4bpa.L	0.073	0.088	0.093	0.084	0.091	0.093	0.096	0.107	0.097	0.089	0.09	0.0913333	1.39726	0.482601
gnl|gene41545|XL-9_2-gene41545|rna84025|	c5.2.L	0.126	0.081	0.102	0.096	0.12	0.09	0.089	0.077	0.082	0.063	0.075	0.0958889	0.630952	-0.664397
gnl|gene47639|XL-9_2-gene47639|rna92857|	c5.L	0.094	0.09	0.096	0.091	0.098	0.095	0.1	0.092	0.094	0.076	0.075	0.0944444	0.989362	-0.01543
gnl|gene50654|XL-9_2-gene50654|rna97266|	c5orf22.L	0.089	0.095	0.082	0.083	0.098	0.085	0.104	0.091	0.092	0.088	0.093	0.091	1.02809	0.0399664
gnl|gene1264|XL-9_2-gene1264|rna3675|	c6.1.L	0.092	0.073	0.086	0.073	0.078	0.089	0.097	0.103	0.105	0.112	0.092	0.0884444	1.13043	0.176878
gnl|gene45762|XL-9_2-gene45762|rna90284|	c6orf120.L	0.087	0.106	0.079	0.087	0.097	0.098	0.099	0.093	0.1	0.071	0.084	0.094	1.1092	0.149514
gnl|gene37985|XL-9_2-gene37985|rna78975|	c6orf120.S	0.101	0.085	0.103	0.101	0.098	0.102	0.087	0.088	0.074	0.074	0.086	0.0932222	0.80198	-0.318361
gnl|gene6799|XL-9_2-gene6799|rna19899|	c7orf25.L	0.097	0.099	0.105	0.096	0.096	0.098	0.085	0.086	0.085	0.077	0.077	0.0941111	0.881443	-0.18206
gnl|gene11618|XL-9_2-gene11618|rna33740|	c7orf57.L	0.112	0.11	0.114	0.108	0.108	0.099	0.083	0.077	0.07	0.056	0.063	0.0978889	0.65625	-0.607683
gnl|gene12109|XL-9_2-gene12109|rna35178|	c8a.L	0.094	0.096	0.09	0.098	0.101	0.1	0.088	0.089	0.089	0.08	0.075	0.0938889	0.946809	-0.0788554
gnl|gene11627|XL-9_2-gene11627|rna33774|	c8orf33.L	0.096	0.086	0.129	0.127	0.112	0.101	0.08	0.067	0.076	0.064	0.063	0.0971111	0.744792	-0.425091
gnl|gene48569|XL-9_2-gene48569|rna94190|	c8orf37.L	0.066	0.099	0.077	0.087	0.066	0.109	0.077	0.086	0.093	0.082	0.157	0.0844444	1.35606	0.439422
gnl|gene12149|XL-9_2-gene12149|rna35300|	c8orf76.L	0.084	0.104	0.086	0.1	0.086	0.093	0.082	0.084	0.069	0.108	0.104	0.0875556	0.910714	-0.13493
gnl|gene17885|XL-9_2-gene17885|rna52281|	c8orf76.S	0.086	0.093	0.092	0.081	0.092	0.092	0.086	0.086	0.079	0.109	0.102	0.0874444	0.959302	-0.0599425
gnl|gene15477|XL-9_2-gene15477|rna45182|	c9.L	0.099	0.096	0.094	0.091	0.099	0.093	0.094	0.094	0.086	0.08	0.076	0.094	0.909091	-0.137504
gnl|gene21236|XL-9_2-gene21236|rna60717|	c9orf142.L	0.089	0.108	0.087	0.106	0.094	0.109	0.079	0.101	0.085	0.068	0.075	0.0953333	1.04494	0.0634254
gnl|gene13172|XL-9_2-gene13172|rna38307|	c9orf78.L	0.09	0.079	0.1	0.094	0.099	0.091	0.1	0.093	0.097	0.079	0.079	0.0936667	1.05556	0.0780025
gnl|gene36693|XL-9_2-gene36693|rna77128|	ca12.L	0.073	0.075	0.092	0.093	0.103	0.098	0.094	0.093	0.111	0.088	0.081	0.0924444	1.39726	0.482601
gnl|gene4819|XL-9_2-gene4819|rna14076|	ca2.L	0.263	0.057	0.192	0.128	0.043	0.031	0.033	0.045	0.032	0.04	0.136	0.0915556	0.146388	-2.77213
gnl|gene18157|XL-9_2-gene18157|rna53061|	ca2.S	0.263	0.056	0.21	0.132	0.038	0.04	0.029	0.036	0.025	0.017	0.155	0.0921111	0.11597	-3.10818
gnl|gene6579|XL-9_2-gene6579|rna19256|	ca5b.L	0.069	0.069	0.079	0.081	0.093	0.099	0.105	0.113	0.108	0.107	0.077	0.0906667	1.60145	0.679378
gnl|gene5469|XL-9_2-gene5469|rna16030|	caap1.L	0.081	0.09	0.077	0.094	0.095	0.111	0.087	0.124	0.078	0.081	0.081	0.093	1.24691	0.318361
gnl|gene15922|XL-9_2-gene15922|rna46541|	cab39.L	0.093	0.095	0.109	0.1	0.094	0.095	0.091	0.093	0.086	0.072	0.072	0.0951111	0.962366	-0.055343
gnl|gene448|XL-9_2-gene448|rna1296|	cab39l.L	0.096	0.088	0.096	0.087	0.087	0.081	0.1	0.098	0.083	0.088	0.095	0.0906667	0.942708	-0.0851166
gnl|gene19218|XL-9_2-gene19218|rna56143|	cab39l.S	0.096	0.086	0.103	0.089	0.095	0.091	0.096	0.096	0.089	0.081	0.079	0.0934444	0.963542	-0.053581
gnl|gene41810|XL-9_2-gene41810|rna84389|	cabin1.L	0.087	0.092	0.09	0.087	0.098	0.101	0.092	0.096	0.089	0.089	0.079	0.0924444	1.06322	0.088438
gnl|gene50739|XL-9_2-gene50739|rna97372|	cachd1.L	0.079	0.093	0.084	0.084	0.084	0.11	0.11	0.097	0.082	0.087	0.088	0.0914444	1.13291	0.180035
gnl|gene5452|XL-9_2-gene5452|rna15981|	cactin.S	0.085	0.068	0.088	0.087	0.103	0.099	0.097	0.09	0.101	0.104	0.079	0.0908889	1.12353	0.168038
gnl|gene10819|XL-9_2-gene10819|rna31447|	cacybp.L	0.094	0.094	0.094	0.09	0.096	0.1	0.085	0.089	0.088	0.082	0.087	0.0922222	0.941489	-0.0869833
gnl|gene15552|XL-9_2-gene15552|rna45419|	cacybp.S	0.097	0.103	0.075	0.083	0.104	0.089	0.09	0.083	0.087	0.089	0.101	0.0901111	0.876289	-0.190522
gnl|gene5637|XL-9_2-gene5637|rna16505|	cad.L	0.088	0.089	0.085	0.089	0.088	0.091	0.09	0.093	0.09	0.099	0.097	0.0892222	1.03977	0.0562682
gnl|gene46541|XL-9_2-gene46541|rna91359|	cadps2.L	0.083	0.081	0.082	0.081	0.09	0.091	0.096	0.102	0.098	0.097	0.097	0.0893333	1.20482	0.268817
gnl|gene44063|XL-9_2-gene44063|rna87757|	calcoco1.S	0.096	0.083	0.106	0.094	0.103	0.094	0.09	0.074	0.093	0.073	0.092	0.0925556	0.869792	-0.201258
gnl|gene17529|XL-9_2-gene17529|rna51184|	calcoco2.S	0.092	0.083	0.09	0.091	0.102	0.094	0.093	0.088	0.092	0.085	0.089	0.0916667	0.978261	-0.0317089
gnl|gene3485|XL-9_2-gene3485|rna10146|	calm2.S	0.088	0.091	0.095	0.076	0.077	0.08	0.103	0.104	0.102	0.09	0.093	0.0906667	1.17045	0.227069
gnl|gene477|XL-9_2-gene477|rna1370|	calr.L	0.075	0.084	0.078	0.082	0.078	0.075	0.101	0.106	0.101	0.113	0.107	0.0866667	1.38	0.464668
gnl|gene38918|XL-9_2-gene38918|rna80306|	calr.S	0.1	0.082	0.098	0.083	0.109	0.096	0.091	0.093	0.091	0.074	0.082	0.0936667	0.92	-0.120294
gnl|gene47552|XL-9_2-gene47552|rna92739|	calu.S	0.073	0.075	0.099	0.06	0.07	0.055	0.12	0.12	0.128	0.097	0.105	0.0888889	1.69863	0.764372
gnl|gene45127|XL-9_2-gene45127|rna89360|	camk1.S	0.087	0.088	0.08	0.09	0.082	0.088	0.094	0.098	0.101	0.098	0.094	0.0897778	1.14368	0.193681
gnl|gene49139|XL-9_2-gene49139|rna94995|	camk2a.S	0.071	0.109	0.091	0.082	0.067	0.095	0.071	0.067	0.104	0.141	0.102	0.0841111	1.20423	0.268105
gnl|gene43449|XL-9_2-gene43449|rna86853|	camk2b.S	0.07	0.093	0.115	0.092	0.073	0.116	0.077	0.087	0.084	0.104	0.09	0.0896667	1.22143	0.288569
gnl|gene7196|XL-9_2-gene7196|rna20997|	camk2d.L	0.095	0.089	0.097	0.097	0.087	0.1	0.091	0.1	0.097	0.082	0.064	0.0947778	1.03684	0.0521962
gnl|gene16544|XL-9_2-gene16544|rna48314|	camk2g.L	0.096	0.087	0.095	0.088	0.099	0.094	0.089	0.087	0.088	0.091	0.086	0.0914444	0.911458	-0.133751
gnl|gene35258|XL-9_2-gene35258|rna75143|	camk2g.S	0.164	0.143	0.095	0.069	0.064	0.069	0.062	0.062	0.06	0.1	0.112	0.0875556	0.371951	-1.42681
gnl|gene15087|XL-9_2-gene15087|rna44023|	camlg.L	0.096	0.092	0.098	0.087	0.098	0.093	0.099	0.096	0.088	0.076	0.075	0.0941111	0.958333	-0.0614005
gnl|gene37945|XL-9_2-gene37945|rna78897|	camsap1.S	0.08	0.107	0.064	0.065	0.08	0.109	0.084	0.091	0.087	0.15	0.082	0.0852222	1.1125	0.153805
gnl|gene47836|XL-9_2-gene47836|rna93111|	cand1.L	0.088	0.103	0.063	0.067	0.094	0.078	0.085	0.078	0.071	0.121	0.153	0.0807778	0.846591	-0.240263
gnl|gene15587|XL-9_2-gene15587|rna45523|	cand1.S	0.103	0.104	0.097	0.095	0.095	0.094	0.086	0.088	0.084	0.075	0.078	0.094	0.834951	-0.260236
gnl|gene9587|XL-9_2-gene9587|rna27889|	c-answer.L	0.14	0.119	0.091	0.11	0.107	0.096	0.074	0.072	0.044	0.059	0.087	0.0947778	0.414286	-1.2713
gnl|gene42840|XL-9_2-gene42840|rna85902|	canx.L	0.102	0.097	0.106	0.106	0.1	0.095	0.085	0.081	0.079	0.073	0.076	0.0945556	0.784314	-0.350497
gnl|gene3002|XL-9_2-gene3002|rna8697|	canx.S	0.081	0.081	0.086	0.076	0.083	0.084	0.107	0.1	0.105	0.099	0.099	0.0892222	1.26543	0.33963
gnl|gene16946|XL-9_2-gene16946|rna49512|	cap1.L	0.098	0.104	0.092	0.093	0.088	0.093	0.087	0.092	0.086	0.086	0.082	0.0925556	0.908163	-0.138976
gnl|gene5812|XL-9_2-gene5812|rna17004|	cap1.S	0.107	0.104	0.098	0.088	0.088	0.091	0.086	0.083	0.08	0.084	0.091	0.0916667	0.761682	-0.392739
gnl|gene8642|XL-9_2-gene8642|rna25159|	cap2.L	0.099	0.087	0.097	0.092	0.104	0.09	0.091	0.09	0.091	0.081	0.079	0.0934444	0.914141	-0.129511
gnl|gene18880|XL-9_2-gene18880|rna55109|	capn1.L	0.106	0.108	0.101	0.085	0.085	0.086	0.085	0.093	0.083	0.085	0.082	0.0924444	0.830189	-0.268489
gnl|gene39819|XL-9_2-gene39819|rna81572|	capn1.S	0.098	0.096	0.096	0.094	0.087	0.09	0.093	0.09	0.089	0.082	0.086	0.0925556	0.913265	-0.130894
gnl|gene12444|XL-9_2-gene12444|rna36175|	capn11.L	0.09	0.087	0.093	0.076	0.082	0.079	0.096	0.096	0.098	0.099	0.104	0.0885556	1.07778	0.10806
gnl|gene16631|XL-9_2-gene16631|rna48587|	capn11.S	0.106	0.113	0.1	0.098	0.096	0.097	0.078	0.078	0.076	0.078	0.079	0.0935556	0.726415	-0.461134
gnl|gene8297|XL-9_2-gene8297|rna24156|	capn12.L	0.093	0.107	0.093	0.102	0.096	0.087	0.097	0.085	0.1	0.05	0.09	0.0955556	0.994624	-0.00777735
gnl|gene7119|XL-9_2-gene7119|rna20789|	capn2.L	0.098	0.102	0.1	0.097	0.093	0.096	0.088	0.088	0.084	0.079	0.075	0.094	0.877551	-0.188445
gnl|gene5922|XL-9_2-gene5922|rna17340|	capn2.S	0.1	0.101	0.102	0.096	0.097	0.103	0.087	0.088	0.077	0.073	0.076	0.0945556	0.825	-0.277534
gnl|gene2553|XL-9_2-gene2553|rna7427|	capn7.L	0.091	0.092	0.094	0.095	0.091	0.096	0.091	0.093	0.091	0.081	0.087	0.0926667	1.01099	0.0157673
gnl|gene10470|XL-9_2-gene10470|rna30411|	capn8.3.L	0.093	0.1	0.103	0.097	0.107	0.1	0.08	0.082	0.081	0.081	0.075	0.0936667	0.876344	-0.190431
gnl|gene37746|XL-9_2-gene37746|rna78567|	capns1.L	0.118	0.09	0.096	0.096	0.088	0.086	0.085	0.084	0.081	0.08	0.095	0.0915556	0.699153	-0.516321
gnl|gene9565|XL-9_2-gene9565|rna27841|	capns2.L	0.075	0.1	0.039	0.065	0.087	0.084	0.084	0.064	0.092	0.15	0.161	0.0766667	1.04	0.0565835
gnl|gene12350|XL-9_2-gene12350|rna35910|	capns2.S	0.102	0.099	0.104	0.1	0.103	0.102	0.086	0.08	0.08	0.07	0.074	0.0951111	0.784314	-0.350497
gnl|gene7819|XL-9_2-gene7819|rna22824|	caprin1.L	0.088	0.08	0.111	0.1	0.098	0.108	0.092	0.092	0.09	0.075	0.065	0.0954444	1.03409	0.048363
gnl|gene9547|XL-9_2-gene9547|rna27779|	caprin1.S	0.089	0.088	0.096	0.097	0.092	0.103	0.092	0.102	0.085	0.082	0.074	0.0937778	1.05056	0.071161
gnl|gene20383|XL-9_2-gene20383|rna59541|	caprin2.L	0.275	0.261	0.055	0.041	0.039	0.034	0.038	0.034	0.04	0.032	0.151	0.0907778	0.134545	-2.89383
gnl|gene3460|XL-9_2-gene3460|rna10059|	capza1.L	0.088	0.077	0.078	0.079	0.09	0.081	0.102	0.096	0.106	0.096	0.107	0.0885556	1.14773	0.19878
gnl|gene14350|XL-9_2-gene14350|rna41799|	capza2.S	0.073	0.063	0.074	0.066	0.08	0.067	0.095	0.088	0.096	0.139	0.158	0.078	1.26027	0.333737
gnl|gene18478|XL-9_2-gene18478|rna53958|	capzb.L	0.094	0.094	0.099	0.095	0.103	0.098	0.086	0.082	0.089	0.078	0.083	0.0933333	0.909574	-0.136736
gnl|gene35881|XL-9_2-gene35881|rna76002|	capzb.S	0.097	0.075	0.104	0.076	0.097	0.102	0.105	0.083	0.091	0.089	0.081	0.0922222	0.896907	-0.156969
gnl|gene3414|XL-9_2-gene3414|rna9939|	carhsp1.S	0.093	0.099	0.1	0.1	0.097	0.105	0.077	0.085	0.08	0.084	0.08	0.0928889	0.887097	-0.172837
gnl|gene49708|XL-9_2-gene49708|rna95809|	carm1.S	0.092	0.09	0.1	0.096	0.102	0.101	0.088	0.091	0.077	0.076	0.088	0.093	0.913043	-0.131245
gnl|gene1868|XL-9_2-gene1868|rna5456|	carm1p1.L	0.092	0.104	0.082	0.103	0.088	0.1	0.088	0.107	0.081	0.084	0.071	0.0938889	1.02174	0.0310269
gnl|gene3059|XL-9_2-gene3059|rna8858|	carmil1.L	0.108	0.082	0.092	0.081	0.074	0.082	0.086	0.084	0.095	0.113	0.104	0.0871111	0.828704	-0.271072
gnl|gene16555|XL-9_2-gene16555|rna48366|	carmil1.S	0.07	0.164	0.14	0.048	0.043	0.14	0.065	0.066	0.054	0.051	0.16	0.0877778	0.857143	-0.222392
gnl|gene7790|XL-9_2-gene7790|rna22742|	carnmt1.S	0.074	0.076	0.075	0.111	0.102	0.111	0.102	0.105	0.081	0.089	0.074	0.093	1.25676	0.329705
gnl|gene45948|XL-9_2-gene45948|rna90532|	cars1.S	0.097	0.102	0.096	0.089	0.091	0.089	0.089	0.089	0.086	0.087	0.086	0.092	0.902062	-0.148702
gnl|gene12266|XL-9_2-gene12266|rna35651|	cars2.L	0.081	0.087	0.078	0.078	0.077	0.082	0.089	0.091	0.082	0.126	0.128	0.0827778	1.0679	0.0947782
gnl|gene10066|XL-9_2-gene10066|rna29253|	casd1.S	0.094	0.086	0.104	0.097	0.11	0.09	0.08	0.081	0.089	0.081	0.089	0.0923333	0.904255	-0.145198
gnl|gene13294|XL-9_2-gene13294|rna38694|	cask.L	0.078	0.087	0.092	0.088	0.066	0.08	0.101	0.112	0.107	0.096	0.093	0.0901111	1.40385	0.489385
gnl|gene15804|XL-9_2-gene15804|rna46178|	casp10.S	0.091	0.08	0.099	0.08	0.105	0.104	0.081	0.089	0.098	0.088	0.085	0.0918889	1.02747	0.0390998
gnl|gene49124|XL-9_2-gene49124|rna94976|	casp3.2.L	0.082	0.099	0.085	0.104	0.105	0.109	0.092	0.089	0.09	0.071	0.074	0.095	1.09146	0.126264
gnl|gene47128|XL-9_2-gene47128|rna92156|	casp6.L	0.097	0.087	0.094	0.1	0.096	0.094	0.094	0.096	0.088	0.078	0.076	0.094	0.948454	-0.0763509
gnl|gene7273|XL-9_2-gene7273|rna21224|	casp7.L	0.093	0.082	0.095	0.093	0.103	0.098	0.087	0.091	0.086	0.088	0.084	0.092	0.951613	-0.0715533
gnl|gene35826|XL-9_2-gene35826|rna75930|	casp7.S	0.091	0.091	0.09	0.092	0.102	0.1	0.096	0.09	0.09	0.077	0.081	0.0935556	0.989011	-0.0159415
gnl|gene37246|XL-9_2-gene37246|rna77911|	casp9.S	0.079	0.091	0.085	0.086	0.095	0.091	0.097	0.103	0.099	0.087	0.087	0.0917778	1.27848	0.354431
gnl|gene44505|XL-9_2-gene44505|rna88456|	cast.L	0.114	0.092	0.118	0.097	0.108	0.094	0.089	0.072	0.084	0.056	0.076	0.0964444	0.684211	-0.547488
gnl|gene14235|XL-9_2-gene14235|rna41489|	cast.S	0.097	0.105	0.093	0.091	0.079	0.079	0.076	0.086	0.072	0.115	0.106	0.0864444	0.814433	-0.296132
gnl|gene501|XL-9_2-gene501|rna1431|	cat.2.L	0.091	0.087	0.091	0.086	0.088	0.087	0.091	0.093	0.089	0.094	0.101	0.0892222	1	0
gnl|gene39885|XL-9_2-gene39885|rna81655|	cat.2.S	0.084	0.081	0.086	0.073	0.09	0.078	0.101	0.108	0.101	0.101	0.098	0.0891111	1.24405	0.315042
gnl|gene2772|XL-9_2-gene2772|rna8073|	cav1.S	0.245	0.105	0.183	0.133	0.037	0.039	0.026	0.041	0.042	0.028	0.12	0.0945556	0.169388	-2.5616
gnl|gene42260|XL-9_2-gene42260|rna85080|	cavin1.L	0.275	0.09	0.196	0.126	0.042	0.045	0.026	0.036	0.028	0.023	0.113	0.096	0.116364	-3.10329
gnl|gene7058|XL-9_2-gene7058|rna20603|	cbl.S	0.092	0.082	0.092	0.078	0.095	0.098	0.091	0.089	0.088	0.089	0.105	0.0894444	0.961957	-0.0559564
gnl|gene36486|XL-9_2-gene36486|rna76843|	cbr1.1.L	0.089	0.089	0.098	0.101	0.093	0.087	0.091	0.092	0.103	0.075	0.081	0.0936667	1.09551	0.131597
gnl|gene11724|XL-9_2-gene11724|rna34061|	cbr1.1.S	0.094	0.088	0.099	0.096	0.088	0.088	0.091	0.088	0.091	0.086	0.091	0.0914444	0.952128	-0.0707731
gnl|gene13351|XL-9_2-gene13351|rna38847|	cbr1.2.S	0.057	0.062	0.063	0.06	0.079	0.071	0.128	0.119	0.131	0.111	0.118	0.0855556	2.19298	1.13289
gnl|gene20128|XL-9_2-gene20128|rna58731|	cbr4.L	0.095	0.096	0.089	0.087	0.103	0.096	0.086	0.096	0.101	0.078	0.074	0.0943333	1.03684	0.0521962
gnl|gene18688|XL-9_2-gene18688|rna54554|	cbs.L	0.09	0.092	0.096	0.102	0.095	0.097	0.091	0.092	0.088	0.081	0.076	0.0936667	1	0
gnl|gene14496|XL-9_2-gene14496|rna42207|	cbs.S	0.074	0.074	0.064	0.08	0.09	0.072	0.141	0.092	0.1	0.099	0.114	0.0874444	1.2973	0.375509
gnl|gene17399|XL-9_2-gene17399|rna50805|	cbwd2.L	0.106	0.112	0.101	0.088	0.091	0.085	0.082	0.085	0.079	0.084	0.087	0.0921111	0.773585	-0.370368
gnl|gene11813|XL-9_2-gene11813|rna34299|	cbx2.L	0.069	0.078	0.094	0.098	0.098	0.099	0.086	0.096	0.102	0.102	0.078	0.0911111	1.43478	0.520832
gnl|gene20281|XL-9_2-gene20281|rna59205|	cbx3.L	0.095	0.087	0.1	0.103	0.107	0.114	0.08	0.091	0.083	0.076	0.064	0.0955556	0.915789	-0.126912
gnl|gene14119|XL-9_2-gene14119|rna41117|	cbx5.L	0.128	0.084	0.076	0.134	0.103	0.109	0.077	0.093	0.07	0.067	0.06	0.0971111	0.636719	-0.651272
gnl|gene31841|XL-9_2-gene31841|rna71361|	cby1.S	0.092	0.098	0.112	0.093	0.093	0.086	0.086	0.082	0.076	0.088	0.093	0.0908889	0.858696	-0.219781
gnl|gene19047|XL-9_2-gene19047|rna55602|	cc2d1a.L	0.1	0.091	0.102	0.099	0.102	0.098	0.087	0.084	0.086	0.071	0.079	0.0943333	0.85	-0.234465
gnl|gene12186|XL-9_2-gene12186|rna35406|	cc2d1b.S	0.093	0.084	0.092	0.093	0.09	0.102	0.087	0.092	0.087	0.091	0.088	0.0911111	0.962366	-0.055343
gnl|gene3767|XL-9_2-gene3767|rna10956|	ccar1.L	0.107	0.1	0.107	0.099	0.097	0.093	0.084	0.073	0.087	0.075	0.078	0.0941111	0.747664	-0.419539
gnl|gene17031|XL-9_2-gene17031|rna49768|	ccdc12.L	0.077	0.089	0.083	0.082	0.077	0.078	0.117	0.111	0.106	0.092	0.088	0.0911111	1.40909	0.494765
gnl|gene3858|XL-9_2-gene3858|rna11248|	ccdc124.L	0.132	0.096	0.108	0.118	0.096	0.096	0.08	0.075	0.077	0.055	0.067	0.0975556	0.575758	-0.796467
gnl|gene6035|XL-9_2-gene6035|rna17664|	ccdc124.S	0.087	0.08	0.089	0.075	0.099	0.074	0.11	0.102	0.099	0.09	0.096	0.0905556	1.15517	0.208108
gnl|gene5334|XL-9_2-gene5334|rna15621|	ccdc127.L	0.092	0.101	0.108	0.103	0.087	0.102	0.089	0.083	0.092	0.077	0.065	0.0952222	0.951087	-0.0723508
gnl|gene18110|XL-9_2-gene18110|rna52928|	ccdc134.L	0.082	0.082	0.078	0.082	0.087	0.083	0.101	0.095	0.098	0.105	0.107	0.0875556	1.17683	0.234905
gnl|gene5969|XL-9_2-gene5969|rna17458|	ccdc134.S	0.092	0.104	0.091	0.109	0.092	0.104	0.084	0.1	0.079	0.083	0.062	0.095	0.972826	-0.0397462
gnl|gene8580|XL-9_2-gene8580|rna24966|	ccdc18.L	0.042	0.046	0.072	0.078	0.101	0.118	0.093	0.11	0.138	0.127	0.074	0.0886667	2.95238	1.56188
gnl|gene2375|XL-9_2-gene2375|rna6907|	ccdc186.L	0.085	0.097	0.093	0.118	0.106	0.1	0.081	0.082	0.086	0.073	0.078	0.0942222	0.988235	-0.0170735
gnl|gene50891|XL-9_2-gene50891|rna97577|	ccdc22.L	0.094	0.087	0.097	0.093	0.1	0.096	0.09	0.089	0.093	0.08	0.082	0.0932222	0.968085	-0.0467942
gnl|gene832|XL-9_2-gene832|rna2431|	ccdc22.S	0.085	0.089	0.095	0.106	0.096	0.102	0.085	0.081	0.091	0.083	0.086	0.0922222	1.01176	0.0168738
gnl|gene12701|XL-9_2-gene12701|rna36895|	ccdc25.L	0.049	0.049	0.068	0.052	0.052	0.053	0.128	0.147	0.134	0.136	0.133	0.0813333	2.86735	1.51972
gnl|gene15277|XL-9_2-gene15277|rna44581|	ccdc32.L	0.09	0.089	0.103	0.091	0.102	0.092	0.091	0.082	0.095	0.078	0.087	0.0927778	0.983333	-0.0242475
gnl|gene46188|XL-9_2-gene46188|rna90839|	ccdc43.L	0.104	0.092	0.098	0.099	0.103	0.094	0.09	0.089	0.091	0.07	0.071	0.0955556	0.865385	-0.208587
gnl|gene11489|XL-9_2-gene11489|rna33385|	ccdc47.L	0.088	0.095	0.082	0.081	0.09	0.09	0.098	0.101	0.094	0.09	0.093	0.091	1.10795	0.147899
gnl|gene7442|XL-9_2-gene7442|rna21686|	ccdc47.S	0.096	0.08	0.083	0.078	0.095	0.078	0.101	0.088	0.108	0.091	0.101	0.0896667	1.02083	0.0297473
gnl|gene43416|XL-9_2-gene43416|rna86800|	ccdc50.L	0.074	0.057	0.092	0.098	0.065	0.086	0.085	0.074	0.137	0.097	0.135	0.0853333	1.42568	0.511646
gnl|gene6671|XL-9_2-gene6671|rna19527|	ccdc51.S	0.088	0.095	0.101	0.098	0.096	0.102	0.09	0.096	0.085	0.077	0.072	0.0945556	1.02841	0.0404143
gnl|gene7142|XL-9_2-gene7142|rna20848|	ccdc56.L	0.096	0.111	0.074	0.086	0.092	0.082	0.089	0.081	0.078	0.104	0.107	0.0876667	0.828125	-0.27208
gnl|gene15840|XL-9_2-gene15840|rna46279|	ccdc6.S	0.1	0.104	0.096	0.098	0.093	0.1	0.09	0.099	0.074	0.071	0.076	0.0948889	0.865	-0.209228
gnl|gene5566|XL-9_2-gene5566|rna16289|	ccdc61.L	0.082	0.11	0.069	0.057	0.07	0.068	0.104	0.087	0.106	0.12	0.127	0.0836667	1.17683	0.234905
gnl|gene44429|XL-9_2-gene44429|rna88343|	ccdc88a.L	0.082	0.067	0.062	0.089	0.105	0.128	0.078	0.083	0.099	0.122	0.086	0.0881111	1.10976	0.150243
gnl|gene20490|XL-9_2-gene20490|rna59832|	ccdc9.L	0.082	0.095	0.097	0.107	0.088	0.112	0.092	0.103	0.08	0.084	0.06	0.0951111	1.11585	0.158148
gnl|gene1875|XL-9_2-gene1875|rna5475|	ccdc93.L	0.092	0.083	0.091	0.093	0.096	0.095	0.093	0.093	0.092	0.087	0.087	0.092	1.00543	0.0078195
gnl|gene5771|XL-9_2-gene5771|rna16880|	ccdc97.L	0.106	0.112	0.085	0.086	0.099	0.085	0.066	0.059	0.074	0.113	0.115	0.0857778	0.627358	-0.672638
gnl|gene15016|XL-9_2-gene15016|rna43814|	cchcr1.L	0.076	0.08	0.082	0.077	0.085	0.081	0.093	0.096	0.088	0.125	0.117	0.0842222	1.21053	0.275634
gnl|gene3554|XL-9_2-gene3554|rna10341|	ccm2.S	0.083	0.085	0.092	0.09	0.092	0.087	0.091	0.091	0.112	0.098	0.078	0.0914444	1.22289	0.290296
gnl|gene8397|XL-9_2-gene8397|rna24445|	ccnb1.2.L	0.024	0.041	0.058	0.062	0.106	0.129	0.118	0.15	0.128	0.117	0.066	0.0906667	5.79167	2.53398
gnl|gene50752|XL-9_2-gene50752|rna97388|	ccnb1.S	0.018	0.021	0.048	0.056	0.084	0.108	0.126	0.149	0.162	0.141	0.085	0.0857778	8.63889	3.11085
gnl|gene12948|XL-9_2-gene12948|rna37619|	ccnb2.S	0.119	0.125	0.122	0.073	0.06	0.073	0.076	0.088	0.089	0.086	0.089	0.0916667	0.743697	-0.427212
gnl|gene5379|XL-9_2-gene5379|rna15772|	ccnb3.L	0.163	0.158	0.176	0.158	0.06	0.041	0.047	0.032	0.042	0.031	0.091	0.0974444	0.226994	-2.13927
gnl|gene18525|XL-9_2-gene18525|rna54101|	ccnb5.L	0.128	0.146	0.104	0.076	0.053	0.066	0.075	0.083	0.073	0.078	0.118	0.0893333	0.609375	-0.714598
gnl|gene1495|XL-9_2-gene1495|rna4345|	ccnc.L	0.093	0.087	0.091	0.089	0.105	0.12	0.088	0.09	0.074	0.077	0.087	0.093	0.88172	-0.181607
gnl|gene171|XL-9_2-gene171|rna474|	ccndbp1.S	0.094	0.1	0.092	0.122	0.103	0.099	0.088	0.076	0.095	0.067	0.065	0.0965556	0.909574	-0.136736
gnl|gene4820|XL-9_2-gene4820|rna14078|	ccne1.L	0.046	0.057	0.044	0.073	0.09	0.149	0.11	0.113	0.131	0.115	0.071	0.0903333	2.65217	1.40718
gnl|gene45449|XL-9_2-gene45449|rna89816|	ccnk.L	0.081	0.088	0.103	0.093	0.112	0.109	0.082	0.098	0.081	0.088	0.066	0.0941111	1.10494	0.143966
gnl|gene858|XL-9_2-gene858|rna2517|	ccnl1.L	0.084	0.081	0.102	0.09	0.102	0.109	0.094	0.085	0.092	0.086	0.073	0.0932222	1.05357	0.0752881
gnl|gene11249|XL-9_2-gene11249|rna32716|	ccp110.S	0.06	0.074	0.061	0.077	0.08	0.09	0.099	0.117	0.119	0.119	0.104	0.0863333	1.96667	0.975752
gnl|gene10181|XL-9_2-gene10181|rna29601|	ccpg1.L	0.084	0.087	0.118	0.104	0.104	0.108	0.082	0.085	0.081	0.075	0.072	0.0947778	0.988095	-0.017278
gnl|gene41447|XL-9_2-gene41447|rna83888|	ccpg1.S	0.108	0.093	0.11	0.095	0.1	0.111	0.078	0.079	0.073	0.071	0.081	0.0941111	0.703704	-0.50696
gnl|gene11281|XL-9_2-gene11281|rna32808|	ccs.L	0.079	0.074	0.075	0.091	0.083	0.075	0.101	0.118	0.099	0.1	0.106	0.0883333	1.37342	0.45777
gnl|gene5465|XL-9_2-gene5465|rna16020|	cct2.L	0.084	0.091	0.077	0.082	0.082	0.09	0.09	0.098	0.085	0.107	0.114	0.0865556	1.08929	0.123382
gnl|gene13545|XL-9_2-gene13545|rna39423|	cct2.S	0.086	0.095	0.086	0.094	0.083	0.087	0.092	0.095	0.094	0.097	0.093	0.0902222	1.09884	0.135978
gnl|gene14983|XL-9_2-gene14983|rna43729|	cct3.S	0.09	0.091	0.094	0.094	0.091	0.093	0.094	0.091	0.096	0.083	0.085	0.0926667	1.03889	0.0550414
gnl|gene10632|XL-9_2-gene10632|rna30904|	cct4.L	0.086	0.094	0.088	0.096	0.084	0.088	0.097	0.099	0.096	0.09	0.083	0.092	1.13372	0.181066
gnl|gene13674|XL-9_2-gene13674|rna39786|	cct4.S	0.093	0.094	0.093	0.091	0.089	0.09	0.095	0.093	0.095	0.084	0.084	0.0925556	1.01075	0.01543
gnl|gene45672|XL-9_2-gene45672|rna90166|	cct5.S	0.089	0.091	0.097	0.095	0.093	0.09	0.093	0.085	0.101	0.081	0.085	0.0926667	1.04494	0.0634254
gnl|gene40748|XL-9_2-gene40748|rna82893|	cct5b	0.081	0.082	0.086	0.091	0.076	0.076	0.102	0.098	0.112	0.096	0.1	0.0893333	1.2963	0.374396
gnl|gene11901|XL-9_2-gene11901|rna34559|	cct6a.L	0.084	0.096	0.084	0.097	0.086	0.085	0.09	0.091	0.098	0.096	0.093	0.0901111	1.125	0.169925
gnl|gene10320|XL-9_2-gene10320|rna29991|	cct6a.S	0.09	0.083	0.086	0.087	0.096	0.08	0.1	0.094	0.102	0.086	0.095	0.0908889	1.08889	0.122857
gnl|gene38384|XL-9_2-gene38384|rna79503|	cct7.L	0.079	0.092	0.082	0.104	0.084	0.083	0.092	0.087	0.109	0.092	0.095	0.0902222	1.24051	0.310929
gnl|gene45958|XL-9_2-gene45958|rna90546|	cct7.S	0.06	0.058	0.049	0.054	0.052	0.053	0.106	0.115	0.079	0.197	0.178	0.0695556	1.61667	0.693022
gnl|gene4994|XL-9_2-gene4994|rna14589|	cct8.L	0.089	0.093	0.095	0.093	0.09	0.092	0.092	0.093	0.087	0.089	0.088	0.0915556	1.01124	0.0161197
gnl|gene5601|XL-9_2-gene5601|rna16399|	cct8.S	0.092	0.084	0.099	0.089	0.094	0.095	0.088	0.084	0.089	0.087	0.097	0.0904444	0.940217	-0.0889337
gnl|gene14688|XL-9_2-gene14688|rna42805|	ccz1b.L	0.09	0.084	0.079	0.087	0.101	0.086	0.104	0.095	0.1	0.082	0.091	0.0917778	1.08333	0.115477
gnl|gene6100|XL-9_2-gene6100|rna17842|	cd151.S	0.116	0.094	0.128	0.117	0.093	0.091	0.077	0.075	0.07	0.073	0.068	0.0956667	0.625	-0.678072
gnl|gene45597|XL-9_2-gene45597|rna90049|	cd276.L	0.128	0.093	0.122	0.117	0.077	0.083	0.094	0.075	0.08	0.05	0.081	0.0965556	0.605469	-0.723876
gnl|gene39073|XL-9_2-gene39073|rna80528|	cd2ap.L	0.096	0.097	0.094	0.094	0.095	0.096	0.094	0.092	0.087	0.078	0.076	0.0938889	0.932292	-0.101147
gnl|gene18394|XL-9_2-gene18394|rna53732|	cd2ap.S	0.105	0.103	0.098	0.095	0.101	0.093	0.092	0.089	0.085	0.066	0.072	0.0956667	0.828571	-0.271302
gnl|gene12253|XL-9_2-gene12253|rna35616|	cd2bp2.L	0.103	0.09	0.122	0.09	0.091	0.103	0.095	0.081	0.094	0.06	0.07	0.0965556	0.849515	-0.235289
gnl|gene692|XL-9_2-gene692|rna2026|	cd2bp2.S	0.109	0.108	0.12	0.107	0.096	0.085	0.063	0.092	0.078	0.068	0.074	0.0953333	0.779817	-0.358793
gnl|gene5385|XL-9_2-gene5385|rna15783|	cd59-like.L	0.087	0.112	0.09	0.117	0.079	0.116	0.081	0.11	0.071	0.075	0.062	0.0958889	1.04023	0.0569024
gnl|gene2818|XL-9_2-gene2818|rna8189|	cd63.L	0.086	0.085	0.091	0.095	0.096	0.098	0.096	0.095	0.097	0.081	0.079	0.0932222	1.11628	0.158698
gnl|gene5889|XL-9_2-gene5889|rna17251|	cd63.S	0.099	0.085	0.099	0.096	0.102	0.09	0.097	0.086	0.096	0.071	0.079	0.0944444	0.919192	-0.121562
gnl|gene3099|XL-9_2-gene3099|rna8979|	cd63l.L	0.105	0.094	0.092	0.086	0.094	0.095	0.102	0.093	0.094	0.072	0.073	0.095	0.890476	-0.167351
gnl|gene16178|XL-9_2-gene16178|rna47273|	cd82.L	0.119	0.093	0.105	0.098	0.103	0.091	0.088	0.087	0.084	0.06	0.074	0.0964444	0.718487	-0.476965
gnl|gene44206|XL-9_2-gene44206|rna87996|	cd82.S	0.107	0.094	0.112	0.094	0.105	0.09	0.087	0.085	0.09	0.064	0.072	0.096	0.817757	-0.290256
gnl|gene50182|XL-9_2-gene50182|rna96548|	cd9.L	0.063	0.066	0.055	0.081	0.1	0.087	0.111	0.114	0.128	0.108	0.088	0.0894444	1.92063	0.941583
gnl|gene45104|XL-9_2-gene45104|rna89328|	cdan1.L	0.078	0.079	0.086	0.095	0.099	0.096	0.094	0.097	0.099	0.084	0.093	0.0914444	1.25641	0.329308
gnl|gene20324|XL-9_2-gene20324|rna59356|	cdc16.L	0.083	0.088	0.086	0.087	0.087	0.096	0.091	0.098	0.092	0.097	0.095	0.0897778	1.14458	0.194816
gnl|gene18459|XL-9_2-gene18459|rna53902|	cdc20.L	0.064	0.058	0.082	0.091	0.097	0.089	0.111	0.102	0.101	0.109	0.095	0.0883333	1.58594	0.665336
gnl|gene150|XL-9_2-gene150|rna420|	cdc23.S	0.096	0.101	0.102	0.098	0.097	0.098	0.085	0.085	0.078	0.08	0.08	0.0933333	0.848958	-0.236234
gnl|gene8506|XL-9_2-gene8506|rna24762|	cdc25c.S	0.101	0.095	0.09	0.098	0.09	0.098	0.098	0.087	0.086	0.082	0.076	0.0936667	0.856436	-0.223583
gnl|gene1557|XL-9_2-gene1557|rna4527|	cdc27.L	0.097	0.079	0.104	0.088	0.11	0.098	0.098	0.083	0.094	0.069	0.081	0.0945556	0.912371	-0.132307
gnl|gene2936|XL-9_2-gene2936|rna8507|	cdc34.L	0.088	0.086	0.087	0.114	0.091	0.124	0.081	0.091	0.093	0.085	0.06	0.095	1.04545	0.0641303
gnl|gene5238|XL-9_2-gene5238|rna15330|	cdc37.S	0.103	0.085	0.113	0.102	0.108	0.094	0.088	0.077	0.09	0.063	0.078	0.0955556	0.81068	-0.302796
gnl|gene8989|XL-9_2-gene8989|rna26173|	cdc40.L	0.079	0.064	0.091	0.086	0.097	0.097	0.09	0.089	0.115	0.102	0.09	0.0897778	1.29114	0.368645
gnl|gene6161|XL-9_2-gene6161|rna18000|	cdc40.S	0.07	0.071	0.082	0.086	0.108	0.089	0.096	0.09	0.117	0.094	0.095	0.0898889	1.47857	0.564204
gnl|gene44948|XL-9_2-gene44948|rna89098|	cdc42.L	0.088	0.09	0.086	0.087	0.092	0.085	0.082	0.08	0.085	0.117	0.108	0.0861111	0.9375	-0.0931094
gnl|gene40341|XL-9_2-gene40341|rna82301|	cdc42bpb.L	0.066	0.063	0.08	0.081	0.093	0.097	0.108	0.105	0.112	0.12	0.075	0.0894444	1.64394	0.717157
gnl|gene16248|XL-9_2-gene16248|rna47457|	cdc42ep4.S	0.102	0.083	0.123	0.109	0.106	0.097	0.099	0.086	0.075	0.057	0.065	0.0977778	0.789216	-0.341508
gnl|gene8065|XL-9_2-gene8065|rna23518|	cdc45.L	0.082	0.083	0.103	0.11	0.097	0.118	0.088	0.092	0.084	0.078	0.065	0.0952222	1.07317	0.10188
gnl|gene7315|XL-9_2-gene7315|rna21343|	cdc5l.L	0.094	0.092	0.115	0.105	0.097	0.094	0.085	0.087	0.083	0.072	0.077	0.0946667	0.904255	-0.145198
gnl|gene9532|XL-9_2-gene9532|rna27729|	cdc6.L	0.027	0.026	0.029	0.045	0.064	0.095	0.105	0.159	0.166	0.193	0.091	0.0795556	6.01852	2.58941
gnl|gene8757|XL-9_2-gene8757|rna25496|	cdc6.S	0.041	0.039	0.04	0.062	0.083	0.092	0.094	0.139	0.175	0.144	0.092	0.085	3.82927	1.93707
gnl|gene46613|XL-9_2-gene46613|rna91447|	cdc7.L	0.068	0.058	0.089	0.09	0.103	0.105	0.086	0.1	0.11	0.106	0.083	0.0898889	1.54412	0.626783
gnl|gene11285|XL-9_2-gene11285|rna32822|	cdc73.L	0.098	0.087	0.104	0.104	0.106	0.113	0.075	0.074	0.084	0.07	0.086	0.0938889	0.806122	-0.310929
gnl|gene12638|XL-9_2-gene12638|rna36721|	cdc73.S	0.097	0.095	0.104	0.099	0.103	0.105	0.087	0.086	0.076	0.074	0.075	0.0946667	0.835052	-0.260063
gnl|gene8185|XL-9_2-gene8185|rna23836|	cdca2-like.L	0.055	0.093	0.083	0.09	0.083	0.121	0.099	0.067	0.104	0.105	0.1	0.0883333	1.55455	0.636493
gnl|gene13801|XL-9_2-gene13801|rna40177|	cdca2-like.S	0.053	0.063	0.058	0.056	0.072	0.072	0.114	0.109	0.118	0.167	0.119	0.0794444	2.14151	1.09863
gnl|gene36869|XL-9_2-gene36869|rna77389|	cdca3.L	0.069	0.074	0.09	0.092	0.088	0.112	0.076	0.076	0.087	0.131	0.104	0.0848889	1.18116	0.240204
gnl|gene2292|XL-9_2-gene2292|rna6675|	cdca9.S	0.098	0.075	0.081	0.082	0.091	0.09	0.09	0.102	0.107	0.097	0.086	0.0906667	1.06633	0.0926493
gnl|gene16474|XL-9_2-gene16474|rna48133|	cdcp1.L	0.094	0.09	0.092	0.091	0.099	0.091	0.108	0.09	0.091	0.075	0.079	0.094	0.962766	-0.054743
gnl|gene40611|XL-9_2-gene40611|rna82695|	cdh3.L	0.07	0.063	0.086	0.093	0.096	0.105	0.103	0.105	0.104	0.095	0.081	0.0916667	1.49286	0.578076
gnl|gene47619|XL-9_2-gene47619|rna92834|	cdh3.S	0.08	0.084	0.086	0.098	0.098	0.109	0.096	0.105	0.087	0.081	0.076	0.0936667	1.2	0.263034
gnl|gene11162|XL-9_2-gene11162|rna32441|	cdk1.L	0.091	0.088	0.102	0.091	0.099	0.091	0.097	0.093	0.093	0.075	0.079	0.0938889	1.02198	0.0313642
gnl|gene8902|XL-9_2-gene8902|rna25929|	cdk1.S	0.102	0.096	0.099	0.104	0.097	0.099	0.086	0.094	0.081	0.071	0.071	0.0953333	0.857843	-0.221214
gnl|gene46808|XL-9_2-gene46808|rna91732|	cdk11b.S	0.098	0.09	0.092	0.086	0.096	0.093	0.092	0.094	0.096	0.082	0.08	0.093	0.969388	-0.0448542
gnl|gene39966|XL-9_2-gene39966|rna81766|	cdk12.L	0.094	0.081	0.11	0.093	0.101	0.114	0.095	0.082	0.085	0.076	0.068	0.095	0.888298	-0.170885
gnl|gene18286|XL-9_2-gene18286|rna53416|	cdk12.S	0.082	0.091	0.082	0.086	0.078	0.089	0.107	0.106	0.083	0.102	0.093	0.0893333	1.15244	0.20469
gnl|gene1672|XL-9_2-gene1672|rna4872|	cdk13.L	0.105	0.095	0.107	0.087	0.094	0.088	0.089	0.084	0.084	0.084	0.082	0.0925556	0.8	-0.321928
gnl|gene4080|XL-9_2-gene4080|rna11878|	cdk17.L	0.067	0.047	0.081	0.085	0.101	0.115	0.117	0.134	0.104	0.091	0.058	0.0945556	1.77612	0.828729
gnl|gene19544|XL-9_2-gene19544|rna57107|	cdk2.L	0.066	0.064	0.083	0.088	0.104	0.106	0.106	0.101	0.112	0.096	0.077	0.0922222	1.61364	0.690316
gnl|gene8367|XL-9_2-gene8367|rna24366|	cdk2ap1.L	0.085	0.071	0.089	0.117	0.113	0.111	0.086	0.078	0.095	0.081	0.074	0.0938889	1.01765	0.0252373
gnl|gene16958|XL-9_2-gene16958|rna49550|	cdk2ap1.S	0.09	0.077	0.108	0.101	0.113	0.088	0.095	0.09	0.096	0.072	0.069	0.0953333	1.03333	0.0473057
gnl|gene49168|XL-9_2-gene49168|rna95041|	cdk5.L	0.096	0.103	0.1	0.105	0.098	0.107	0.076	0.079	0.071	0.087	0.077	0.0927778	0.78125	-0.356144
gnl|gene18826|XL-9_2-gene18826|rna54952|	cdk5rap1.L	0.092	0.093	0.093	0.105	0.107	0.098	0.09	0.085	0.08	0.072	0.085	0.0936667	0.896739	-0.15724
gnl|gene31300|XL-9_2-gene31300|rna70816|	cdk5rap3.L	0.104	0.095	0.102	0.097	0.098	0.108	0.086	0.088	0.086	0.065	0.072	0.096	0.836538	-0.257496
gnl|gene39051|XL-9_2-gene39051|rna80497|	cdk5rap3.S	0.095	0.087	0.103	0.087	0.105	0.093	0.098	0.081	0.097	0.07	0.086	0.094	0.936842	-0.0941222
gnl|gene5343|XL-9_2-gene5343|rna15649|	cdkal1.S	0.089	0.089	0.086	0.079	0.091	0.095	0.095	0.1	0.094	0.091	0.091	0.0908889	1.08989	0.124179
gnl|gene5543|XL-9_2-gene5543|rna16230|	cdkn2aip.L	0.082	0.08	0.105	0.105	0.087	0.145	0.087	0.08	0.075	0.075	0.08	0.094	0.945122	-0.0814276
gnl|gene7053|XL-9_2-gene7053|rna20588|	cdo1.S	0.046	0.044	0.065	0.064	0.083	0.098	0.109	0.122	0.136	0.143	0.09	0.0852222	2.80435	1.48767
gnl|gene43308|XL-9_2-gene43308|rna86636|	cdr2.S	0.097	0.108	0.094	0.086	0.097	0.094	0.099	0.081	0.07	0.066	0.108	0.0917778	0.778351	-0.361508
gnl|gene48714|XL-9_2-gene48714|rna94400|	cds2.S	0.082	0.088	0.081	0.083	0.083	0.087	0.094	0.11	0.102	0.088	0.103	0.09	1.29268	0.370368
gnl|gene5931|XL-9_2-gene5931|rna17363|	cdt1.L	0.061	0.056	0.064	0.083	0.082	0.117	0.104	0.134	0.106	0.125	0.069	0.0896667	1.96721	0.976153
gnl|gene18166|XL-9_2-gene18166|rna53087|	cdt1.S	0.082	0.085	0.097	0.112	0.113	0.111	0.088	0.095	0.093	0.058	0.066	0.0973333	1.14634	0.197037
gnl|gene9651|XL-9_2-gene9651|rna28089|	cdv3.L	0.101	0.088	0.102	0.093	0.105	0.091	0.091	0.079	0.09	0.076	0.084	0.0933333	0.836634	-0.257332
gnl|gene8864|XL-9_2-gene8864|rna25811|	cdv3.S	0.106	0.111	0.111	0.104	0.093	0.09	0.07	0.074	0.069	0.082	0.09	0.092	0.674528	-0.568049
gnl|gene49235|XL-9_2-gene49235|rna95136|	cdyl.L	0.074	0.055	0.072	0.083	0.094	0.087	0.104	0.1	0.089	0.107	0.134	0.0842222	1.27703	0.352789
gnl|gene38720|XL-9_2-gene38720|rna79994|	cebpz.L	0.097	0.08	0.093	0.084	0.1	0.087	0.094	0.089	0.091	0.088	0.098	0.0905556	0.927835	-0.10806
gnl|gene3730|XL-9_2-gene3730|rna10863|	cebpz.S	0.112	0.086	0.121	0.109	0.11	0.093	0.084	0.071	0.085	0.063	0.066	0.0967778	0.696429	-0.521953
gnl|gene14372|XL-9_2-gene14372|rna41853|	cecr2.S	0.076	0.083	0.084	0.1	0.105	0.107	0.103	0.088	0.086	0.094	0.076	0.0924444	1.14474	0.195016
gnl|gene47449|XL-9_2-gene47449|rna92605|	celf1.L	0.086	0.089	0.091	0.08	0.092	0.093	0.08	0.093	0.102	0.091	0.103	0.0895556	1.13372	0.181066
gnl|gene43370|XL-9_2-gene43370|rna86741|	celf1.S	0.095	0.091	0.089	0.091	0.1	0.098	0.094	0.089	0.085	0.092	0.078	0.0924444	0.915789	-0.126912
gnl|gene17952|XL-9_2-gene17952|rna52475|	cemip.S	0.104	0.098	0.09	0.086	0.107	0.091	0.11	0.082	0.092	0.063	0.077	0.0955556	0.836538	-0.257496
gnl|gene13408|XL-9_2-gene13408|rna39006|	cemip2.L	0.09	0.092	0.09	0.093	0.096	0.098	0.094	0.092	0.089	0.078	0.089	0.0926667	1.00556	0.00799279
gnl|gene16790|XL-9_2-gene16790|rna49058|	cenpc.L	0.088	0.079	0.097	0.086	0.11	0.109	0.11	0.093	0.085	0.078	0.066	0.0952222	1.01136	0.0163018
gnl|gene42936|XL-9_2-gene42936|rna86107|	cenpe.L	0.077	0.078	0.085	0.096	0.098	0.099	0.092	0.093	0.095	0.094	0.092	0.0903333	1.22078	0.287802
gnl|gene10131|XL-9_2-gene10131|rna29464|	cenpj.L	0.071	0.089	0.094	0.095	0.103	0.11	0.091	0.098	0.089	0.088	0.073	0.0933333	1.3169	0.397147
gnl|gene7211|XL-9_2-gene7211|rna21038|	cenpo.L	0.075	0.067	0.072	0.071	0.073	0.07	0.114	0.111	0.102	0.123	0.122	0.0838889	1.42	0.505891
gnl|gene4443|XL-9_2-gene4443|rna12962|	cenpp.L	0.087	0.09	0.084	0.095	0.093	0.11	0.089	0.1	0.089	0.08	0.083	0.093	1.08621	0.119299
gnl|gene1706|XL-9_2-gene1706|rna4967|	cenpt.L	0.1	0.102	0.104	0.104	0.095	0.099	0.08	0.085	0.077	0.08	0.076	0.094	0.81	-0.304006
gnl|gene11170|XL-9_2-gene11170|rna32462|	cenpu.L	0.1	0.092	0.113	0.104	0.107	0.089	0.08	0.08	0.078	0.074	0.082	0.0936667	0.79	-0.340075
gnl|gene3219|XL-9_2-gene3219|rna9328|	cenpv.L	0.257	0.076	0.226	0.155	0.032	0.033	0.021	0.023	0.024	0.015	0.138	0.0941111	0.0914397	-3.45104
gnl|gene19572|XL-9_2-gene19572|rna57188|	cep120.L	0.072	0.07	0.09	0.093	0.111	0.103	0.087	0.098	0.115	0.091	0.07	0.0932222	1.47917	0.564785
gnl|gene5743|XL-9_2-gene5743|rna16807|	cep152.L	0.065	0.069	0.095	0.101	0.098	0.116	0.1	0.107	0.09	0.083	0.077	0.0934444	1.51538	0.599684
gnl|gene15753|XL-9_2-gene15753|rna46016|	cep164.L	0.097	0.081	0.114	0.092	0.124	0.085	0.077	0.063	0.079	0.09	0.097	0.0902222	0.731959	-0.450166
gnl|gene19107|XL-9_2-gene19107|rna55791|	cep192.L	0.075	0.082	0.082	0.083	0.091	0.094	0.099	0.111	0.104	0.09	0.088	0.0912222	1.43333	0.519374
gnl|gene186|XL-9_2-gene186|rna525|	cep20.L	0.084	0.075	0.091	0.089	0.099	0.106	0.089	0.093	0.111	0.085	0.077	0.093	1.21429	0.280108
gnl|gene18599|XL-9_2-gene18599|rna54298|	cep350.L	0.09	0.091	0.12	0.097	0.1	0.103	0.08	0.079	0.09	0.078	0.072	0.0944444	0.938889	-0.0909737
gnl|gene12608|XL-9_2-gene12608|rna36644|	cep41.L	0.078	0.074	0.082	0.066	0.082	0.083	0.099	0.102	0.103	0.119	0.112	0.0854444	1.3141	0.394078
gnl|gene17642|XL-9_2-gene17642|rna51550|	cep41.S	0.085	0.085	0.093	0.095	0.096	0.106	0.092	0.092	0.084	0.085	0.085	0.092	1.03529	0.0500407
gnl|gene3888|XL-9_2-gene3888|rna11343|	cep43.L	0.091	0.098	0.101	0.094	0.098	0.099	0.086	0.095	0.086	0.076	0.077	0.0942222	0.994505	-0.00794875
gnl|gene15600|XL-9_2-gene15600|rna45554|	cep44.L	0.081	0.077	0.087	0.091	0.094	0.097	0.101	0.1	0.099	0.084	0.09	0.0918889	1.2284	0.296775
gnl|gene8617|XL-9_2-gene8617|rna25091|	cep55.L	0.075	0.077	0.104	0.088	0.099	0.105	0.092	0.097	0.097	0.084	0.081	0.0926667	1.29333	0.371094
gnl|gene15140|XL-9_2-gene15140|rna44192|	cep63.L	0.065	0.062	0.105	0.111	0.13	0.115	0.102	0.088	0.089	0.069	0.065	0.0963333	1.36154	0.445238
gnl|gene13928|XL-9_2-gene13928|rna40554|	cep76.L	0.066	0.072	0.067	0.084	0.089	0.14	0.099	0.066	0.12	0.122	0.075	0.0892222	1.40909	0.494765
gnl|gene1538|XL-9_2-gene1538|rna4467|	cep85.L	0.073	0.081	0.094	0.096	0.104	0.11	0.089	0.094	0.094	0.09	0.076	0.0927778	1.28767	0.364764
gnl|gene17643|XL-9_2-gene17643|rna51553|	cep85.S	0.089	0.101	0.087	0.102	0.105	0.107	0.083	0.089	0.082	0.083	0.072	0.0938889	0.960674	-0.0578809
gnl|gene15976|XL-9_2-gene15976|rna46700|	cep97.L	0.096	0.101	0.099	0.096	0.088	0.099	0.096	0.091	0.085	0.071	0.077	0.0945556	0.916667	-0.125531
gnl|gene49648|XL-9_2-gene49648|rna95717|	cept1.S	0.088	0.084	0.081	0.1	0.095	0.09	0.105	0.105	0.086	0.092	0.076	0.0926667	1.08523	0.117997
gnl|gene2722|XL-9_2-gene2722|rna7908|	cers2.S	0.093	0.084	0.107	0.105	0.111	0.103	0.083	0.076	0.07	0.078	0.091	0.0924444	0.784946	-0.349334
gnl|gene17887|XL-9_2-gene17887|rna52285|	cers5.S	0.086	0.084	0.102	0.101	0.108	0.107	0.085	0.085	0.09	0.076	0.075	0.0942222	1.01744	0.0249464
gnl|gene14818|XL-9_2-gene14818|rna43228|	cert1.L	0.106	0.108	0.096	0.099	0.095	0.095	0.085	0.09	0.08	0.073	0.074	0.0948889	0.801887	-0.31853
gnl|gene20247|XL-9_2-gene20247|rna59111|	cert1.S	0.09	0.092	0.085	0.111	0.099	0.104	0.084	0.092	0.089	0.082	0.072	0.094	1.00556	0.00799279
gnl|gene49140|XL-9_2-gene49140|rna94996|	ces3.5.L	0.084	0.085	0.083	0.07	0.081	0.08	0.11	0.107	0.105	0.099	0.096	0.0894444	1.2619	0.335603
gnl|gene17894|XL-9_2-gene17894|rna52302|	cetn1.S	0.083	0.078	0.105	0.086	0.091	0.089	0.104	0.087	0.103	0.089	0.085	0.0917778	1.14458	0.194816
gnl|gene2075|XL-9_2-gene2075|rna6019|	cetn3.S	0.057	0.06	0.07	0.076	0.092	0.104	0.112	0.124	0.115	0.115	0.075	0.09	2.09649	1.06798
gnl|gene1434|XL-9_2-gene1434|rna4185|	cfap20.S	0.103	0.095	0.102	0.1	0.099	0.103	0.084	0.085	0.09	0.073	0.065	0.0956667	0.849515	-0.235289
gnl|gene18781|XL-9_2-gene18781|rna54825|	cfap300.L	0.096	0.085	0.086	0.101	0.106	0.105	0.089	0.084	0.089	0.08	0.079	0.0934444	0.901042	-0.150334
gnl|gene14163|XL-9_2-gene14163|rna41246|	cfap36.L	0.099	0.098	0.104	0.091	0.105	0.093	0.091	0.076	0.078	0.084	0.08	0.0927778	0.777778	-0.36257
gnl|gene1937|XL-9_2-gene1937|rna5638|	cfap410.S	0.107	0.083	0.09	0.092	0.091	0.109	0.082	0.092	0.085	0.088	0.081	0.0923333	0.827103	-0.273861
gnl|gene809|XL-9_2-gene809|rna2358|	cfap46.L	0.058	0.062	0.048	0.061	0.081	0.102	0.139	0.134	0.093	0.128	0.094	0.0864444	1.9569	0.968567
gnl|gene3569|XL-9_2-gene3569|rna10383|	cfap97.L	0.078	0.075	0.092	0.088	0.104	0.109	0.089	0.101	0.094	0.092	0.077	0.0922222	1.25	0.321928
gnl|gene16797|XL-9_2-gene16797|rna49077|	cfdp1.L	0.089	0.09	0.1	0.095	0.099	0.101	0.086	0.085	0.089	0.085	0.081	0.0926667	0.977528	-0.0327899
gnl|gene18116|XL-9_2-gene18116|rna52944|	cfh.L	0.094	0.091	0.087	0.091	0.098	0.093	0.093	0.095	0.087	0.085	0.086	0.0921111	0.968085	-0.0467942
gnl|gene39251|XL-9_2-gene39251|rna80765|	cfl1.L	0.085	0.096	0.084	0.098	0.088	0.092	0.094	0.092	0.102	0.086	0.084	0.0923333	1.14118	0.190522
gnl|gene15554|XL-9_2-gene15554|rna45423|	cfl1.S	0.075	0.091	0.068	0.074	0.081	0.08	0.101	0.116	0.101	0.11	0.103	0.0874444	1.44667	0.532733
gnl|gene5661|XL-9_2-gene5661|rna16583|	cfl2.L	0.069	0.082	0.05	0.057	0.076	0.089	0.126	0.123	0.105	0.108	0.117	0.0863333	1.65217	0.724366
gnl|gene8247|XL-9_2-gene8247|rna24009|	cflar.L	0.086	0.066	0.072	0.077	0.084	0.102	0.118	0.109	0.096	0.099	0.091	0.09	1.19186	0.253215
gnl|gene54|XL-9_2-gene54|rna164|	cgl.2.L	0.081	0.094	0.079	0.097	0.086	0.095	0.097	0.093	0.101	0.09	0.086	0.0914444	1.19753	0.260063
gnl|gene42857|XL-9_2-gene42857|rna85921|	cgl.2.S	0.103	0.119	0.083	0.081	0.093	0.108	0.086	0.086	0.097	0.066	0.079	0.0951111	0.88835	-0.170801
gnl|gene14298|XL-9_2-gene14298|rna41651|	cgn.L	0.084	0.095	0.095	0.1	0.098	0.104	0.087	0.094	0.09	0.08	0.074	0.0941111	1.09524	0.131245
gnl|gene18844|XL-9_2-gene18844|rna54999|	cgn.S	0.088	0.098	0.103	0.106	0.107	0.116	0.075	0.071	0.081	0.076	0.079	0.0938889	0.863636	-0.211504
gnl|gene20395|XL-9_2-gene20395|rna59575|	cgnl1.L	0.082	0.073	0.101	0.094	0.101	0.106	0.094	0.099	0.095	0.083	0.073	0.0938889	1.18293	0.242361
gnl|gene14679|XL-9_2-gene14679|rna42781|	cgnl1.S	0.073	0.077	0.102	0.101	0.103	0.125	0.09	0.094	0.096	0.074	0.066	0.0956667	1.30137	0.380031
gnl|gene14226|XL-9_2-gene14226|rna41446|	chac2.S	0.087	0.084	0.072	0.107	0.103	0.108	0.078	0.104	0.099	0.063	0.096	0.0935556	1.16667	0.222392
gnl|gene34725|XL-9_2-gene34725|rna74392|	chaf1a.L	0.099	0.102	0.096	0.088	0.091	0.092	0.091	0.091	0.091	0.078	0.081	0.0934444	0.919192	-0.121562
gnl|gene1224|XL-9_2-gene1224|rna3562|	chaf1b.L	0.084	0.098	0.097	0.101	0.094	0.102	0.084	0.09	0.079	0.091	0.08	0.0921111	1.00595	0.00856201
gnl|gene5158|XL-9_2-gene5158|rna15086|	champ1.S	0.081	0.081	0.093	0.097	0.105	0.101	0.086	0.101	0.099	0.091	0.065	0.0937778	1.23457	0.304006
gnl|gene42319|XL-9_2-gene42319|rna85169|	chchd1.L	0.088	0.068	0.107	0.14	0.086	0.078	0.089	0.08	0.101	0.09	0.074	0.093	1.02841	0.0404143
gnl|gene6514|XL-9_2-gene6514|rna19053|	chchd10.L	0.112	0.078	0.118	0.099	0.106	0.092	0.084	0.08	0.09	0.061	0.08	0.0954444	0.758929	-0.397964
gnl|gene42150|XL-9_2-gene42150|rna84909|	chchd2.L	0.084	0.074	0.09	0.09	0.098	0.093	0.092	0.098	0.113	0.083	0.085	0.0924444	1.25595	0.328782
gnl|gene1346|XL-9_2-gene1346|rna3925|	chchd3.L	0.103	0.089	0.112	0.088	0.106	0.09	0.09	0.085	0.092	0.067	0.076	0.095	0.859223	-0.218895
gnl|gene18074|XL-9_2-gene18074|rna52825|	chchd3.S	0.092	0.103	0.087	0.091	0.092	0.085	0.081	0.082	0.083	0.1	0.104	0.0884444	0.896739	-0.15724
gnl|gene13980|XL-9_2-gene13980|rna40691|	chchd4.L	0.068	0.065	0.059	0.061	0.065	0.069	0.113	0.087	0.092	0.211	0.109	0.0754444	1.31618	0.396353
gnl|gene38670|XL-9_2-gene38670|rna79911|	chchd4.S	0.088	0.084	0.102	0.09	0.094	0.09	0.09	0.084	0.103	0.085	0.09	0.0916667	1.0625	0.0874628
gnl|gene15604|XL-9_2-gene15604|rna45565|	chchd6.S	0.155	0.144	0.145	0.08	0.076	0.078	0.066	0.07	0.068	0.058	0.059	0.098	0.445161	-1.1676
gnl|gene2271|XL-9_2-gene2271|rna6601|	chchd7.L	0.088	0.095	0.085	0.103	0.093	0.094	0.098	0.081	0.089	0.084	0.09	0.0917778	0.965909	-0.0500407
gnl|gene13168|XL-9_2-gene13168|rna38296|	chd1.L	0.069	0.055	0.085	0.085	0.099	0.104	0.095	0.119	0.123	0.096	0.07	0.0926667	1.75362	0.810339
gnl|gene8743|XL-9_2-gene8743|rna25455|	chd3.L	0.087	0.08	0.095	0.084	0.094	0.087	0.09	0.087	0.08	0.108	0.11	0.0871111	0.95977	-0.0592392
gnl|gene17926|XL-9_2-gene17926|rna52406|	chd4.L	0.091	0.089	0.091	0.092	0.097	0.094	0.092	0.093	0.091	0.084	0.085	0.0922222	1.01099	0.0157673
gnl|gene45283|XL-9_2-gene45283|rna89590|	chd7.L	0.077	0.092	0.076	0.086	0.082	0.096	0.1	0.089	0.107	0.091	0.105	0.0894444	1.27273	0.347923
gnl|gene13221|XL-9_2-gene13221|rna38478|	chd7.S	0.089	0.092	0.101	0.09	0.093	0.101	0.096	0.087	0.09	0.083	0.076	0.0932222	0.994382	-0.00812788
gnl|gene3357|XL-9_2-gene3357|rna9754|	chd8.L	0.1	0.098	0.102	0.095	0.096	0.099	0.081	0.086	0.086	0.078	0.079	0.0936667	0.86	-0.217591
gnl|gene12831|XL-9_2-gene12831|rna37290|	chd8.S	0.1	0.097	0.093	0.095	0.1	0.1	0.085	0.092	0.086	0.074	0.08	0.0942222	0.89	-0.168123
gnl|gene38231|XL-9_2-gene38231|rna79309|	chek1.L	0.088	0.092	0.094	0.098	0.103	0.104	0.089	0.09	0.082	0.082	0.078	0.0933333	0.977273	-0.0331669
gnl|gene1778|XL-9_2-gene1778|rna5154|	chek1.S	0.08	0.085	0.089	0.07	0.077	0.085	0.15	0.101	0.107	0.066	0.091	0.0937778	1.3	0.378512
gnl|gene45888|XL-9_2-gene45888|rna90455|	chek2.L	0.09	0.094	0.088	0.087	0.096	0.089	0.095	0.088	0.095	0.089	0.09	0.0913333	1.01667	0.0238467
gnl|gene5737|XL-9_2-gene5737|rna16790|	cherp.L	0.094	0.083	0.088	0.101	0.102	0.106	0.091	0.096	0.085	0.082	0.072	0.094	0.962766	-0.054743
gnl|gene4172|XL-9_2-gene4172|rna12144|	chfr.L	0.095	0.088	0.101	0.104	0.104	0.102	0.073	0.083	0.095	0.073	0.083	0.0938889	0.936842	-0.0941222
gnl|gene15609|XL-9_2-gene15609|rna45577|	chid1.L	0.09	0.092	0.091	0.075	0.085	0.077	0.09	0.09	0.087	0.109	0.114	0.0863333	0.983333	-0.0242475
gnl|gene34395|XL-9_2-gene34395|rna73953|	chm.L	0.081	0.104	0.061	0.078	0.077	0.08	0.086	0.101	0.068	0.133	0.129	0.0817778	1.04321	0.0610294
gnl|gene41504|XL-9_2-gene41504|rna83969|	chm.S	0.086	0.114	0.096	0.073	0.072	0.105	0.101	0.106	0.084	0.089	0.074	0.093	1.10465	0.143591
gnl|gene19360|XL-9_2-gene19360|rna56566|	chmp1a.S	0.1	0.091	0.115	0.095	0.102	0.093	0.087	0.083	0.089	0.073	0.073	0.095	0.86	-0.217591
gnl|gene1178|XL-9_2-gene1178|rna3430|	chmp1b.S	0.104	0.129	0.126	0.132	0.117	0.136	0.054	0.055	0.06	0.042	0.045	0.101444	0.552885	-0.85495
gnl|gene16513|XL-9_2-gene16513|rna48238|	chmp2a.L	0.104	0.112	0.126	0.11	0.117	0.118	0.068	0.065	0.071	0.049	0.059	0.099	0.653846	-0.612977
gnl|gene3700|XL-9_2-gene3700|rna10777|	chmp2a.S	0.121	0.092	0.109	0.104	0.1	0.099	0.084	0.085	0.082	0.061	0.062	0.0973333	0.690083	-0.535159
gnl|gene18435|XL-9_2-gene18435|rna53843|	chmp2b.L	0.11	0.101	0.124	0.104	0.109	0.108	0.077	0.071	0.072	0.061	0.063	0.0973333	0.65	-0.621488
gnl|gene18180|XL-9_2-gene18180|rna53124|	chmp2b.S	0.082	0.11	0.094	0.119	0.086	0.127	0.077	0.096	0.075	0.073	0.063	0.0962222	1.04268	0.0603005
gnl|gene49755|XL-9_2-gene49755|rna95868|	chmp3.S	0.089	0.113	0.064	0.077	0.074	0.081	0.079	0.095	0.085	0.126	0.117	0.0841111	1.01124	0.0161197
gnl|gene14321|XL-9_2-gene14321|rna41712|	chmp4b.L	0.091	0.109	0.097	0.109	0.089	0.106	0.081	0.097	0.072	0.081	0.068	0.0945556	0.928571	-0.106915
gnl|gene19808|XL-9_2-gene19808|rna57856|	chmp4b.S	0.088	0.094	0.093	0.102	0.1	0.089	0.085	0.088	0.092	0.084	0.085	0.0923333	1.02273	0.0324215
gnl|gene11551|XL-9_2-gene11551|rna33546|	chmp4c.L	0.111	0.073	0.126	0.083	0.116	0.09	0.091	0.069	0.096	0.067	0.079	0.095	0.743243	-0.428094
gnl|gene20427|XL-9_2-gene20427|rna59667|	chmp5.L	0.103	0.101	0.111	0.105	0.107	0.11	0.081	0.073	0.077	0.063	0.068	0.0964444	0.728155	-0.457682
gnl|gene4863|XL-9_2-gene4863|rna14204|	chmp5.S	0.092	0.096	0.105	0.112	0.094	0.096	0.093	0.089	0.081	0.072	0.069	0.0953333	0.923913	-0.114171
gnl|gene6541|XL-9_2-gene6541|rna19144|	chmp6.S	0.09	0.105	0.103	0.104	0.101	0.102	0.088	0.085	0.076	0.08	0.067	0.0948889	0.894444	-0.160936
gnl|gene39173|XL-9_2-gene39173|rna80678|	chmp7.L	0.096	0.105	0.074	0.104	0.083	0.101	0.094	0.097	0.09	0.078	0.078	0.0937778	0.973958	-0.038068
gnl|gene18001|XL-9_2-gene18001|rna52612|	chn1.S	0.084	0.094	0.094	0.085	0.089	0.08	0.097	0.107	0.093	0.093	0.085	0.0914444	1.19048	0.251539
gnl|gene48611|XL-9_2-gene48611|rna94244|	chordc1.S	0.099	0.106	0.088	0.097	0.097	0.093	0.085	0.085	0.081	0.084	0.086	0.0923333	0.838384	-0.254317
gnl|gene6121|XL-9_2-gene6121|rna17897|	chp1.L	0.09	0.095	0.089	0.089	0.111	0.095	0.085	0.083	0.077	0.097	0.089	0.0904444	0.888889	-0.169925
gnl|gene36405|XL-9_2-gene36405|rna76728|	chrac1.S	0.1	0.104	0.105	0.097	0.109	0.115	0.076	0.08	0.07	0.071	0.073	0.0951111	0.75	-0.415037
gnl|gene41888|XL-9_2-gene41888|rna84488|	chrd.1.S	0.078	0.094	0.091	0.082	0.09	0.081	0.09	0.105	0.102	0.11	0.076	0.0903333	1.32692	0.408085
gnl|gene20272|XL-9_2-gene20272|rna59178|	chst10.L	0.097	0.097	0.116	0.085	0.114	0.104	0.084	0.073	0.079	0.066	0.085	0.0943333	0.783505	-0.351985
gnl|gene919|XL-9_2-gene919|rna2706|	chsy1.L	0.125	0.107	0.136	0.104	0.134	0.102	0.07	0.057	0.057	0.051	0.057	0.0991111	0.456	-1.13289
gnl|gene40009|XL-9_2-gene40009|rna81824|	chtf18.L	0.091	0.087	0.097	0.1	0.102	0.097	0.091	0.087	0.088	0.077	0.084	0.0933333	0.961538	-0.0565835
gnl|gene17460|XL-9_2-gene17460|rna50995|	chtf8.L	0.077	0.076	0.08	0.08	0.081	0.084	0.088	0.086	0.082	0.137	0.129	0.0815556	1.09091	0.125531
gnl|gene49964|XL-9_2-gene49964|rna96207|	chtop.S	0.104	0.106	0.125	0.082	0.102	0.089	0.08	0.087	0.087	0.08	0.059	0.0957778	0.836538	-0.257496
gnl|gene2111|XL-9_2-gene2111|rna6137|	chuk.S	0.071	0.082	0.07	0.087	0.096	0.095	0.094	0.102	0.097	0.104	0.102	0.0882222	1.40141	0.486878
gnl|gene1219|XL-9_2-gene1219|rna3550|	ciao1.L	0.091	0.085	0.088	0.091	0.089	0.087	0.082	0.107	0.098	0.083	0.1	0.0908889	1.12637	0.171685
gnl|gene19468|XL-9_2-gene19468|rna56904|	ciao1.S	0.088	0.088	0.103	0.078	0.092	0.089	0.1	0.095	0.102	0.074	0.091	0.0927778	1.11932	0.16262
gnl|gene15312|XL-9_2-gene15312|rna44699|	ciao2a.L	0.098	0.078	0.083	0.078	0.102	0.072	0.103	0.09	0.102	0.086	0.107	0.0895556	0.979592	-0.0297473
gnl|gene45883|XL-9_2-gene45883|rna90439|	ciao3.S	0.097	0.101	0.083	0.094	0.095	0.096	0.082	0.089	0.077	0.096	0.09	0.0904444	0.85567	-0.224873
gnl|gene7935|XL-9_2-gene7935|rna23144|	ciapin1.L	0.091	0.092	0.088	0.082	0.09	0.088	0.101	0.099	0.1	0.082	0.085	0.0923333	1.09341	0.12883
gnl|gene17883|XL-9_2-gene17883|rna52264|	cib1.L	0.081	0.078	0.091	0.101	0.122	0.12	0.097	0.089	0.087	0.065	0.068	0.0962222	1.08642	0.119582
gnl|gene11757|XL-9_2-gene11757|rna34144|	cibar1.S	0.087	0.091	0.095	0.1	0.105	0.104	0.094	0.084	0.09	0.084	0.066	0.0944444	1	0
gnl|gene42504|XL-9_2-gene42504|rna85444|	cip2a.L	0.082	0.083	0.101	0.099	0.101	0.11	0.095	0.083	0.085	0.088	0.074	0.0932222	1.02439	0.0347654
gnl|gene19556|XL-9_2-gene19556|rna57146|	cipc.S	0.087	0.084	0.098	0.091	0.101	0.107	0.091	0.091	0.098	0.078	0.074	0.0942222	1.08621	0.119299
gnl|gene4142|XL-9_2-gene4142|rna12062|	cirbp.L	0.078	0.096	0.07	0.087	0.081	0.079	0.1	0.106	0.106	0.098	0.098	0.0892222	1.35897	0.442518
gnl|gene780|XL-9_2-gene780|rna2274|	cirbp.S	0.085	0.085	0.086	0.094	0.088	0.086	0.098	0.099	0.105	0.087	0.086	0.0917778	1.2	0.263034
gnl|gene12455|XL-9_2-gene12455|rna36208|	cisd1.L	0.088	0.11	0.087	0.103	0.089	0.095	0.085	0.09	0.095	0.081	0.078	0.0935556	1.05114	0.0719498
gnl|gene47273|XL-9_2-gene47273|rna92356|	cisd1.L	0.102	0.109	0.118	0.099	0.099	0.113	0.081	0.083	0.072	0.061	0.061	0.0973333	0.759804	-0.396301
gnl|gene35465|XL-9_2-gene35465|rna75445|	cisd2.L	0.09	0.099	0.081	0.083	0.083	0.079	0.1	0.104	0.092	0.092	0.096	0.0901111	1.08889	0.122857
gnl|gene9889|XL-9_2-gene9889|rna28749|	cisd3.L	0.088	0.09	0.094	0.097	0.096	0.106	0.088	0.093	0.098	0.075	0.074	0.0944444	1.08523	0.117997
gnl|gene5814|XL-9_2-gene5814|rna17014|	cit.L	0.092	0.089	0.093	0.095	0.093	0.091	0.095	0.092	0.094	0.08	0.085	0.0926667	1.01087	0.0155969
gnl|gene13926|XL-9_2-gene13926|rna40546|	ckap2.S	0.108	0.091	0.124	0.108	0.107	0.101	0.085	0.072	0.076	0.062	0.065	0.0968889	0.685185	-0.545434
gnl|gene11089|XL-9_2-gene11089|rna32230|	ckap4.L	0.093	0.082	0.096	0.087	0.099	0.086	0.089	0.083	0.108	0.077	0.099	0.0914444	1.02688	0.03827
gnl|gene19906|XL-9_2-gene19906|rna58131|	ckap5.L	0.086	0.088	0.093	0.097	0.096	0.097	0.094	0.099	0.091	0.08	0.079	0.0934444	1.10465	0.143591
gnl|gene10478|XL-9_2-gene10478|rna30441|	ckap5.S	0.089	0.093	0.085	0.089	0.093	0.095	0.088	0.093	0.095	0.095	0.084	0.0911111	1.05618	0.0788554
gnl|gene46498|XL-9_2-gene46498|rna91295|	ckb.L	0.067	0.073	0.07	0.07	0.071	0.074	0.103	0.104	0.1	0.137	0.132	0.0813333	1.52239	0.606336
gnl|gene20304|XL-9_2-gene20304|rna59291|	ckb.S	0.078	0.095	0.074	0.074	0.074	0.068	0.1	0.105	0.104	0.115	0.114	0.0857778	1.33974	0.421957
gnl|gene7639|XL-9_2-gene7639|rna22273|	ckm.L	0.091	0.107	0.088	0.11	0.091	0.112	0.078	0.082	0.073	0.095	0.073	0.0924444	0.851648	-0.23167
gnl|gene17760|XL-9_2-gene17760|rna51911|	clasp1.L	0.08	0.072	0.071	0.099	0.097	0.105	0.083	0.093	0.079	0.113	0.109	0.0865556	1.075	0.104337
gnl|gene8389|XL-9_2-gene8389|rna24426|	clasp1.S	0.101	0.087	0.1	0.105	0.104	0.098	0.09	0.084	0.086	0.069	0.075	0.095	0.841584	-0.248821
gnl|gene10817|XL-9_2-gene10817|rna31438|	clcc1.L	0.093	0.101	0.095	0.1	0.1	0.1	0.077	0.104	0.08	0.086	0.063	0.0944444	0.989247	-0.0155969
gnl|gene44742|XL-9_2-gene44742|rna88793|	clcc1.S	0.115	0.079	0.098	0.098	0.101	0.095	0.088	0.091	0.08	0.088	0.068	0.0938889	0.743478	-0.427638
gnl|gene6542|XL-9_2-gene6542|rna19146|	clcn5.L	0.103	0.088	0.109	0.099	0.092	0.093	0.081	0.083	0.092	0.072	0.087	0.0933333	0.849515	-0.235289
gnl|gene19026|XL-9_2-gene19026|rna55529|	clcn7.L	0.087	0.092	0.1	0.092	0.098	0.111	0.099	0.091	0.088	0.071	0.071	0.0953333	1.02874	0.0408723
gnl|gene15072|XL-9_2-gene15072|rna43984|	cldn6.1.L	0.055	0.076	0.074	0.064	0.081	0.088	0.106	0.111	0.103	0.131	0.111	0.0842222	1.94545	0.960107
gnl|gene16082|XL-9_2-gene16082|rna47008|	cldn6.2.S	0.086	0.057	0.099	0.082	0.115	0.086	0.101	0.082	0.124	0.074	0.094	0.0924444	1.19767	0.260236
gnl|gene13380|XL-9_2-gene13380|rna38923|	clec16a.L	0.091	0.086	0.084	0.077	0.081	0.097	0.093	0.101	0.094	0.106	0.091	0.0893333	1.07143	0.0995357
gnl|gene8010|XL-9_2-gene8010|rna23350|	clgn.L	0.085	0.089	0.084	0.087	0.092	0.098	0.092	0.09	0.092	0.101	0.091	0.0898889	1.07059	0.0984037
gnl|gene6592|XL-9_2-gene6592|rna19295|	clic1.L	0.094	0.086	0.093	0.094	0.091	0.091	0.095	0.095	0.094	0.085	0.081	0.0925556	1.00532	0.00765357
gnl|gene17757|XL-9_2-gene17757|rna51906|	clic1.S	0.084	0.093	0.088	0.089	0.088	0.094	0.094	0.098	0.1	0.084	0.088	0.092	1.17857	0.237039
gnl|gene13043|XL-9_2-gene13043|rna37899|	clic4.S	0.081	0.073	0.077	0.091	0.076	0.068	0.106	0.094	0.102	0.102	0.13	0.0853333	1.20988	0.27486
gnl|gene18199|XL-9_2-gene18199|rna53171|	clint1.S	0.1	0.092	0.09	0.089	0.099	0.095	0.089	0.086	0.094	0.082	0.085	0.0926667	0.9	-0.152003
gnl|gene46437|XL-9_2-gene46437|rna91207|	clip1.L	0.095	0.09	0.093	0.098	0.099	0.097	0.095	0.091	0.086	0.075	0.082	0.0937778	0.931579	-0.10225
gnl|gene12507|XL-9_2-gene12507|rna36378|	clip1.S	0.091	0.09	0.091	0.091	0.097	0.095	0.093	0.092	0.089	0.082	0.089	0.0921111	0.994505	-0.00794875
gnl|gene18824|XL-9_2-gene18824|rna54945|	cln6.S	0.095	0.102	0.099	0.107	0.103	0.102	0.05	0.057	0.085	0.104	0.096	0.0888889	0.747368	-0.420108
gnl|gene1709|XL-9_2-gene1709|rna4972|	clns1a.S	0.085	0.081	0.077	0.081	0.082	0.079	0.101	0.103	0.097	0.104	0.109	0.0873333	1.17647	0.234465
gnl|gene40659|XL-9_2-gene40659|rna82763|	clp1.L	0.074	0.089	0.092	0.088	0.09	0.093	0.097	0.101	0.088	0.099	0.089	0.0902222	1.27703	0.352789
gnl|gene18723|XL-9_2-gene18723|rna54656|	clpb.L	0.092	0.088	0.091	0.093	0.092	0.092	0.09	0.095	0.083	0.096	0.089	0.0906667	0.967391	-0.0478285
gnl|gene20065|XL-9_2-gene20065|rna58564|	clpp.S	0.094	0.091	0.09	0.086	0.1	0.09	0.094	0.088	0.093	0.083	0.09	0.0917778	0.962766	-0.054743
gnl|gene39588|XL-9_2-gene39588|rna81223|	clptm1.L	0.103	0.101	0.114	0.113	0.103	0.111	0.076	0.08	0.07	0.063	0.067	0.0967778	0.728155	-0.457682
gnl|gene38956|XL-9_2-gene38956|rna80364|	clptm1.S	0.094	0.096	0.119	0.111	0.099	0.095	0.094	0.084	0.083	0.058	0.066	0.0972222	0.888298	-0.170885
gnl|gene15050|XL-9_2-gene15050|rna43914|	clpx.L	0.088	0.084	0.093	0.092	0.099	0.101	0.101	0.093	0.092	0.081	0.077	0.0936667	1.05114	0.0719498
gnl|gene19214|XL-9_2-gene19214|rna56135|	clspn.S	0.056	0.055	0.073	0.084	0.089	0.102	0.099	0.117	0.119	0.115	0.091	0.0882222	2.10714	1.07529
gnl|gene5114|XL-9_2-gene5114|rna14951|	cltb.L	0.115	0.105	0.111	0.106	0.096	0.101	0.082	0.079	0.076	0.062	0.067	0.0967778	0.673913	-0.569366
gnl|gene7019|XL-9_2-gene7019|rna20495|	cltb.S	0.097	0.092	0.11	0.101	0.103	0.098	0.092	0.089	0.083	0.066	0.071	0.0961111	0.886598	-0.173648
gnl|gene880|XL-9_2-gene880|rna2583|	cltc.L	0.105	0.117	0.074	0.087	0.1	0.097	0.081	0.084	0.079	0.087	0.089	0.0915556	0.77619	-0.365517
gnl|gene17440|XL-9_2-gene17440|rna50939|	cltc.S	0.087	0.083	0.084	0.081	0.086	0.083	0.098	0.098	0.096	0.101	0.102	0.0884444	1.11494	0.156969
gnl|gene6460|XL-9_2-gene6460|rna18901|	cltcl1.L	0.096	0.103	0.099	0.101	0.097	0.101	0.083	0.087	0.081	0.076	0.076	0.0942222	0.875	-0.192645
gnl|gene15755|XL-9_2-gene15755|rna46022|	cltcl1.S	0.079	0.079	0.095	0.098	0.105	0.109	0.092	0.09	0.094	0.08	0.078	0.0934444	1.16456	0.219781
gnl|gene47112|XL-9_2-gene47112|rna92137|	cluap1.L	0.092	0.083	0.102	0.086	0.105	0.103	0.095	0.084	0.094	0.078	0.079	0.0937778	0.967391	-0.0478285
gnl|gene6096|XL-9_2-gene6096|rna17832|	cluh.L	0.089	0.086	0.086	0.088	0.089	0.087	0.099	0.097	0.09	0.094	0.096	0.0901111	1.05056	0.071161
gnl|gene18694|XL-9_2-gene18694|rna54569|	cluh.S	0.093	0.092	0.095	0.095	0.096	0.098	0.088	0.093	0.095	0.079	0.077	0.0938889	1.01075	0.01543
gnl|gene50085|XL-9_2-gene50085|rna96380|	clybl.L	0.114	0.139	0.112	0.101	0.097	0.109	0.062	0.068	0.064	0.068	0.066	0.0962222	0.578947	-0.788496
gnl|gene50057|XL-9_2-gene50057|rna96340|	cmas.L	0.05	0.055	0.064	0.058	0.071	0.088	0.108	0.118	0.151	0.142	0.095	0.0847778	2.69	1.42761
gnl|gene9958|XL-9_2-gene9958|rna28946|	cmbl.L	0.099	0.095	0.095	0.116	0.093	0.088	0.082	0.087	0.089	0.079	0.076	0.0937778	0.888889	-0.169925
gnl|gene13489|XL-9_2-gene13489|rna39242|	cmpk1.S	0.073	0.068	0.08	0.074	0.071	0.071	0.099	0.106	0.091	0.137	0.13	0.0814444	1.34932	0.432227
gnl|gene50208|XL-9_2-gene50208|rna96594|	cmss1.L	0.09	0.069	0.083	0.081	0.087	0.075	0.104	0.104	0.121	0.099	0.087	0.0904444	1.25	0.321928
gnl|gene12351|XL-9_2-gene12351|rna35911|	cmtr1.L	0.093	0.096	0.105	0.099	0.094	0.089	0.092	0.088	0.092	0.079	0.075	0.0942222	0.967742	-0.0473057
gnl|gene11469|XL-9_2-gene11469|rna33335|	cmtr1.S	0.069	0.08	0.089	0.099	0.101	0.101	0.087	0.109	0.084	0.107	0.076	0.091	1.39855	0.483933
gnl|gene12413|XL-9_2-gene12413|rna36090|	cmtr2.L	0.092	0.091	0.092	0.101	0.104	0.101	0.089	0.08	0.091	0.075	0.085	0.0934444	0.929348	-0.105709
gnl|gene43580|XL-9_2-gene43580|rna87066|	cnbp.L	0.096	0.085	0.104	0.09	0.103	0.094	0.092	0.081	0.096	0.071	0.089	0.0934444	0.921875	-0.117357
gnl|gene7924|XL-9_2-gene7924|rna23115|	cnbp.S	0.103	0.09	0.093	0.088	0.097	0.088	0.092	0.084	0.102	0.073	0.09	0.093	0.902913	-0.147342
gnl|gene14635|XL-9_2-gene14635|rna42653|	cndp2.L	0.088	0.091	0.099	0.096	0.091	0.096	0.089	0.09	0.093	0.084	0.084	0.0925556	1.03977	0.0562682
gnl|gene16971|XL-9_2-gene16971|rna49580|	cndp2.S	0.092	0.105	0.105	0.104	0.091	0.098	0.086	0.089	0.084	0.073	0.072	0.0948889	0.940217	-0.0889337
gnl|gene2674|XL-9_2-gene2674|rna7762|	cnih4.S	0.083	0.109	0.103	0.07	0.088	0.075	0.098	0.094	0.086	0.108	0.085	0.0895556	1.08434	0.116814
gnl|gene44874|XL-9_2-gene44874|rna88983|	cnksr1.L	0.102	0.099	0.105	0.098	0.111	0.102	0.077	0.079	0.081	0.074	0.073	0.0948889	0.784314	-0.350497
gnl|gene1169|XL-9_2-gene1169|rna3394|	cnksr2.L	0.092	0.088	0.111	0.108	0.114	0.102	0.097	0.076	0.083	0.062	0.068	0.0967778	0.86413	-0.210679
gnl|gene8586|XL-9_2-gene8586|rna24984|	cnn1.S	0.176	0.085	0.143	0.116	0.067	0.063	0.059	0.065	0.056	0.055	0.116	0.0922222	0.34375	-1.54057
gnl|gene18444|XL-9_2-gene18444|rna53868|	cnn3.L	0.098	0.076	0.066	0.095	0.098	0.092	0.085	0.106	0.114	0.09	0.08	0.0922222	1.12245	0.16665
gnl|gene9528|XL-9_2-gene9528|rna27719|	cnn3.S	0.087	0.082	0.095	0.089	0.09	0.091	0.097	0.104	0.108	0.083	0.076	0.0936667	1.21839	0.284977
gnl|gene7820|XL-9_2-gene7820|rna22826|	cnnm4.L	0.135	0.118	0.112	0.109	0.115	0.124	0.06	0.063	0.07	0.046	0.047	0.100667	0.492593	-1.02153
gnl|gene6913|XL-9_2-gene6913|rna20198|	cnot1.L	0.102	0.1	0.098	0.095	0.095	0.104	0.083	0.083	0.081	0.079	0.08	0.0934444	0.803922	-0.314873
gnl|gene8877|XL-9_2-gene8877|rna25841|	cnot1.S	0.092	0.086	0.102	0.091	0.097	0.09	0.096	0.087	0.093	0.079	0.089	0.0926667	0.978261	-0.0317089
gnl|gene14905|XL-9_2-gene14905|rna43508|	cnot10.L	0.093	0.072	0.111	0.1	0.107	0.09	0.103	0.08	0.089	0.068	0.088	0.0938889	0.908602	-0.138279
gnl|gene3645|XL-9_2-gene3645|rna10598|	cnot10.S	0.079	0.079	0.084	0.083	0.079	0.08	0.092	0.082	0.086	0.127	0.131	0.0826667	1.06329	0.0885367
gnl|gene8216|XL-9_2-gene8216|rna23929|	cnot11.S	0.103	0.083	0.114	0.098	0.106	0.094	0.086	0.082	0.089	0.068	0.078	0.095	0.830097	-0.268648
gnl|gene20475|XL-9_2-gene20475|rna59795|	cnot2.S	0.095	0.09	0.101	0.103	0.098	0.094	0.097	0.091	0.09	0.069	0.072	0.0954444	0.952632	-0.0700097
gnl|gene19366|XL-9_2-gene19366|rna56585|	cnot3.L	0.086	0.087	0.103	0.086	0.086	0.092	0.089	0.094	0.099	0.087	0.09	0.0913333	1.12209	0.166192
gnl|gene18508|XL-9_2-gene18508|rna54050|	cnot3.S	0.087	0.098	0.098	0.095	0.098	0.097	0.092	0.096	0.086	0.076	0.077	0.0941111	1.04598	0.0648511
gnl|gene15372|XL-9_2-gene15372|rna44857|	cnot4.L	0.073	0.083	0.125	0.102	0.108	0.112	0.092	0.087	0.082	0.065	0.071	0.096	1.15753	0.211055
gnl|gene14222|XL-9_2-gene14222|rna41431|	cnot8.L	0.048	0.045	0.062	0.079	0.092	0.106	0.11	0.109	0.132	0.129	0.088	0.087	2.51042	1.32793
gnl|gene43026|XL-9_2-gene43026|rna86211|	cnp.L	0.087	0.094	0.092	0.097	0.093	0.1	0.082	0.104	0.095	0.078	0.078	0.0937778	1.14368	0.193681
gnl|gene14097|XL-9_2-gene14097|rna41061|	cnp.S	0.098	0.082	0.099	0.098	0.098	0.096	0.098	0.101	0.096	0.063	0.07	0.0962222	1.0051	0.00734198
gnl|gene13533|XL-9_2-gene13533|rna39382|	cnpy1.L	0.098	0.08	0.117	0.092	0.095	0.107	0.101	0.088	0.087	0.062	0.073	0.0961111	0.892857	-0.163499
gnl|gene10798|XL-9_2-gene10798|rna31390|	cnpy2.L	0.085	0.076	0.083	0.073	0.091	0.076	0.109	0.101	0.108	0.097	0.101	0.0891111	1.22941	0.297968
gnl|gene3931|XL-9_2-gene3931|rna11462|	cnpy2.S	0.096	0.086	0.087	0.091	0.097	0.098	0.09	0.097	0.096	0.086	0.076	0.0931111	1.00521	0.00749454
gnl|gene9493|XL-9_2-gene9493|rna27611|	cnpy3.L	0.102	0.097	0.096	0.091	0.101	0.096	0.093	0.085	0.091	0.068	0.079	0.0946667	0.862745	-0.212994
gnl|gene14523|XL-9_2-gene14523|rna42287|	coa6.L	0.094	0.122	0.086	0.106	0.095	0.087	0.07	0.085	0.074	0.093	0.089	0.091	0.845745	-0.241706
gnl|gene2711|XL-9_2-gene2711|rna7865|	cobll1.L	0.096	0.088	0.1	0.098	0.093	0.099	0.09	0.081	0.081	0.085	0.09	0.0917778	0.84375	-0.245112
gnl|gene11307|XL-9_2-gene11307|rna32880|	cog1.S	0.083	0.092	0.082	0.086	0.089	0.089	0.096	0.098	0.098	0.085	0.102	0.0903333	1.18072	0.23967
gnl|gene43444|XL-9_2-gene43444|rna86844|	cog2.S	0.096	0.098	0.098	0.099	0.102	0.109	0.085	0.082	0.085	0.073	0.071	0.0948889	0.869792	-0.201258
gnl|gene44213|XL-9_2-gene44213|rna88008|	cog3.L	0.088	0.086	0.09	0.092	0.094	0.098	0.096	0.091	0.093	0.088	0.082	0.092	1.04545	0.0641303
gnl|gene41297|XL-9_2-gene41297|rna83696|	cog4.L	0.087	0.09	0.084	0.082	0.087	0.096	0.096	0.104	0.096	0.089	0.087	0.0913333	1.14943	0.200913
gnl|gene17872|XL-9_2-gene17872|rna52228|	cog5.L	0.106	0.092	0.096	0.106	0.103	0.1	0.089	0.084	0.079	0.074	0.07	0.095	0.768868	-0.379192
gnl|gene17922|XL-9_2-gene17922|rna52385|	cog6.L	0.096	0.094	0.102	0.099	0.1	0.098	0.09	0.085	0.081	0.081	0.074	0.0938889	0.864583	-0.209923
gnl|gene6106|XL-9_2-gene6106|rna17856|	cog7.L	0.087	0.12	0.066	0.087	0.085	0.091	0.089	0.094	0.09	0.096	0.096	0.0898889	1.05747	0.0806185
gnl|gene5817|XL-9_2-gene5817|rna17026|	cog7.S	0.097	0.095	0.091	0.086	0.094	0.096	0.09	0.092	0.089	0.089	0.081	0.0922222	0.93299	-0.100067
gnl|gene15413|XL-9_2-gene15413|rna44986|	cog8.L	0.105	0.085	0.104	0.09	0.106	0.1	0.094	0.076	0.09	0.067	0.083	0.0944444	0.790476	-0.339206
gnl|gene13145|XL-9_2-gene13145|rna38208|	coil.L	0.085	0.082	0.099	0.098	0.103	0.107	0.096	0.095	0.092	0.073	0.068	0.0952222	1.1	0.137504
gnl|gene18150|XL-9_2-gene18150|rna53033|	col12a1.L	0.274	0.101	0.149	0.135	0.04	0.041	0.032	0.04	0.035	0.03	0.124	0.0941111	0.136861	-2.86921
gnl|gene45460|XL-9_2-gene45460|rna89832|	col12a1.S	0.211	0.102	0.143	0.119	0.072	0.067	0.048	0.052	0.049	0.046	0.092	0.0958889	0.239336	-2.06289
gnl|gene29834|XL-9_2-gene29834|rna69346|	col15a1.L	0.086	0.083	0.079	0.086	0.093	0.108	0.082	0.1	0.099	0.094	0.089	0.0906667	1.15698	0.21036
gnl|gene44735|XL-9_2-gene44735|rna88765|	col1a1.S	0.169	0.072	0.117	0.186	0.073	0.075	0.069	0.078	0.057	0.047	0.056	0.0995556	0.399408	-1.32406
gnl|gene9226|XL-9_2-gene9226|rna26799|	col1a2.L	0.204	0.059	0.101	0.202	0.055	0.077	0.063	0.08	0.056	0.052	0.053	0.0996667	0.333333	-1.58496
gnl|gene43565|XL-9_2-gene43565|rna87037|	col6a1.L	0.386	0.029	0.198	0.18	0.023	0.028	0.021	0.06	0.02	0.021	0.033	0.105	0.103627	-3.27053
gnl|gene8001|XL-9_2-gene8001|rna23331|	col6a2.S	0.291	0.046	0.155	0.139	0.039	0.051	0.046	0.069	0.044	0.057	0.062	0.0977778	0.194158	-2.3647
gnl|gene6450|XL-9_2-gene6450|rna18875|	colgalt1.L	0.095	0.08	0.09	0.103	0.101	0.099	0.089	0.099	0.088	0.072	0.084	0.0937778	0.984211	-0.0229611
gnl|gene16490|XL-9_2-gene16490|rna48178|	colgalt1.S	0.086	0.089	0.087	0.089	0.088	0.094	0.093	0.099	0.099	0.09	0.087	0.0915556	1.15116	0.203092
gnl|gene16698|XL-9_2-gene16698|rna48800|	commd1.L	0.089	0.08	0.083	0.099	0.095	0.097	0.092	0.094	0.081	0.101	0.09	0.09	0.983146	-0.0245223
gnl|gene19649|XL-9_2-gene19649|rna57423|	commd10.L	0.081	0.072	0.084	0.088	0.087	0.09	0.08	0.08	0.082	0.129	0.125	0.0826667	1	0
gnl|gene34638|XL-9_2-gene34638|rna74273|	commd3.L	0.094	0.09	0.088	0.077	0.079	0.077	0.094	0.098	0.115	0.088	0.101	0.0902222	1.13298	0.180121
gnl|gene11363|XL-9_2-gene11363|rna33029|	commd4.S	0.076	0.075	0.067	0.076	0.083	0.083	0.103	0.102	0.082	0.126	0.128	0.083	1.21053	0.275634
gnl|gene19081|XL-9_2-gene19081|rna55708|	commd5.L	0.089	0.084	0.097	0.09	0.094	0.102	0.097	0.091	0.091	0.083	0.084	0.0927778	1.02247	0.0320612
gnl|gene46562|XL-9_2-gene46562|rna91382|	commd6.L	0.099	0.089	0.08	0.086	0.084	0.091	0.109	0.083	0.097	0.091	0.09	0.0908889	0.909091	-0.137504
gnl|gene6692|XL-9_2-gene6692|rna19590|	commd6.S	0.094	0.092	0.104	0.108	0.099	0.108	0.085	0.09	0.08	0.069	0.071	0.0955556	0.904255	-0.145198
gnl|gene9335|XL-9_2-gene9335|rna27139|	commd7.S	0.082	0.084	0.085	0.085	0.078	0.086	0.101	0.098	0.098	0.1	0.101	0.0885556	1.19512	0.257158
gnl|gene37202|XL-9_2-gene37202|rna77859|	commd9.L	0.074	0.07	0.079	0.067	0.074	0.073	0.113	0.119	0.115	0.11	0.107	0.0871111	1.58108	0.660911
gnl|gene5226|XL-9_2-gene5226|rna15300|	comt.S	0.092	0.079	0.116	0.088	0.098	0.072	0.107	0.078	0.074	0.082	0.115	0.0893333	0.826087	-0.275634
gnl|gene4234|XL-9_2-gene4234|rna12321|	cop1.L	0.097	0.09	0.102	0.093	0.104	0.093	0.092	0.089	0.085	0.08	0.075	0.0938889	0.896907	-0.156969
gnl|gene12732|XL-9_2-gene12732|rna36999|	copa.L	0.078	0.076	0.078	0.081	0.084	0.084	0.091	0.089	0.089	0.129	0.122	0.0833333	1.14103	0.190331
gnl|gene36880|XL-9_2-gene36880|rna77403|	copa.S	0.089	0.096	0.073	0.076	0.096	0.085	0.095	0.102	0.104	0.093	0.091	0.0906667	1.1573	0.210767
gnl|gene18095|XL-9_2-gene18095|rna52887|	copb1.L	0.088	0.092	0.084	0.088	0.089	0.087	0.098	0.1	0.09	0.093	0.091	0.0906667	1.07955	0.110424
gnl|gene4446|XL-9_2-gene4446|rna12972|	copb1.S	0.091	0.109	0.083	0.098	0.088	0.098	0.081	0.103	0.079	0.093	0.077	0.0922222	1	0
gnl|gene4852|XL-9_2-gene4852|rna14173|	copb2.L	0.096	0.095	0.1	0.098	0.101	0.101	0.087	0.087	0.083	0.074	0.076	0.0942222	0.885417	-0.175572
gnl|gene7289|XL-9_2-gene7289|rna21268|	copb2.S	0.075	0.07	0.079	0.076	0.079	0.08	0.104	0.113	0.106	0.113	0.104	0.0868889	1.46	0.545968
gnl|gene10574|XL-9_2-gene10574|rna30725|	cope.L	0.091	0.083	0.104	0.085	0.105	0.094	0.092	0.084	0.093	0.081	0.087	0.0923333	0.972527	-0.0401891
gnl|gene17941|XL-9_2-gene17941|rna52451|	copg1.L	0.096	0.092	0.094	0.09	0.099	0.092	0.097	0.093	0.089	0.078	0.081	0.0935556	0.947917	-0.0771679
gnl|gene7388|XL-9_2-gene7388|rna21547|	copg1.S	0.075	0.087	0.069	0.101	0.078	0.093	0.094	0.111	0.087	0.103	0.1	0.0883333	1.32	0.400538
gnl|gene8812|XL-9_2-gene8812|rna25665|	copg2.S	0.096	0.095	0.096	0.098	0.102	0.095	0.084	0.09	0.09	0.074	0.081	0.094	0.9375	-0.0931094
gnl|gene224|XL-9_2-gene224|rna624|	cops2.L	0.089	0.095	0.076	0.079	0.08	0.077	0.095	0.103	0.088	0.116	0.102	0.0868889	1.07303	0.101695
gnl|gene190|XL-9_2-gene190|rna537|	cops3.S	0.091	0.094	0.098	0.094	0.095	0.097	0.096	0.092	0.092	0.073	0.078	0.0943333	1.01099	0.0157673
gnl|gene5240|XL-9_2-gene5240|rna15333|	cops4.L	0.091	0.1	0.087	0.087	0.086	0.092	0.088	0.097	0.086	0.095	0.09	0.0904444	1.00549	0.0079052
gnl|gene42527|XL-9_2-gene42527|rna85477|	cops5.L	0.071	0.101	0.071	0.084	0.074	0.091	0.092	0.119	0.081	0.113	0.1	0.0871111	1.40845	0.494109
gnl|gene39481|XL-9_2-gene39481|rna81076|	cops6.S	0.073	0.08	0.085	0.05	0.065	0.053	0.121	0.141	0.134	0.103	0.095	0.0891111	1.88356	0.913463
gnl|gene9146|XL-9_2-gene9146|rna26588|	cops7b.S	0.089	0.106	0.111	0.1	0.106	0.095	0.054	0.061	0.072	0.1	0.105	0.0882222	0.747191	-0.420451
gnl|gene20355|XL-9_2-gene20355|rna59452|	cops8.L	0.107	0.088	0.093	0.084	0.084	0.103	0.085	0.089	0.105	0.076	0.087	0.0931111	0.906542	-0.141554
gnl|gene18429|XL-9_2-gene18429|rna53829|	cops8.S	0.098	0.114	0.083	0.08	0.084	0.082	0.082	0.087	0.079	0.107	0.103	0.0876667	0.846939	-0.23967
gnl|gene6568|XL-9_2-gene6568|rna19228|	copz1.L	0.089	0.083	0.091	0.082	0.098	0.083	0.11	0.09	0.107	0.077	0.091	0.0925556	1.10674	0.146318
gnl|gene11425|XL-9_2-gene11425|rna33221|	coq10a.L	0.078	0.094	0.093	0.12	0.083	0.098	0.105	0.09	0.075	0.08	0.083	0.0928889	1.05769	0.08092
gnl|gene4321|XL-9_2-gene4321|rna12606|	coq10a.S	0.088	0.098	0.095	0.097	0.093	0.094	0.081	0.091	0.085	0.085	0.092	0.0913333	1	0
gnl|gene18649|XL-9_2-gene18649|rna54441|	coq3.L	0.092	0.098	0.093	0.1	0.095	0.097	0.091	0.096	0.087	0.075	0.077	0.0943333	0.994565	-0.00786212
gnl|gene5398|XL-9_2-gene5398|rna15827|	coq4.L	0.089	0.099	0.09	0.095	0.093	0.096	0.094	0.088	0.088	0.089	0.079	0.0924444	0.988764	-0.0163018
gnl|gene15989|XL-9_2-gene15989|rna46742|	coq5.L	0.088	0.094	0.09	0.094	0.09	0.092	0.09	0.101	0.09	0.088	0.084	0.0921111	1.08523	0.117997
gnl|gene11460|XL-9_2-gene11460|rna33308|	coq6.L	0.092	0.099	0.094	0.09	0.094	0.1	0.07	0.073	0.066	0.109	0.112	0.0864444	0.755435	-0.404621
gnl|gene4677|XL-9_2-gene4677|rna13660|	coq6.S	0.111	0.119	0.119	0.076	0.089	0.086	0.076	0.08	0.083	0.083	0.079	0.0932222	0.734234	-0.445688
gnl|gene6485|XL-9_2-gene6485|rna18973|	coq7.L	0.089	0.088	0.08	0.09	0.096	0.091	0.088	0.099	0.099	0.095	0.085	0.0911111	1.11236	0.153623
gnl|gene13441|XL-9_2-gene13441|rna39120|	coq8a.L	0.089	0.09	0.089	0.098	0.094	0.094	0.094	0.103	0.091	0.079	0.079	0.0935556	1.08989	0.124179
gnl|gene10074|XL-9_2-gene10074|rna29277|	coq8a.S	0.069	0.088	0.077	0.081	0.086	0.097	0.098	0.106	0.11	0.097	0.092	0.0902222	1.56522	0.646363
gnl|gene3486|XL-9_2-gene3486|rna10148|	coq8b.L	0.086	0.082	0.088	0.093	0.099	0.108	0.093	0.094	0.093	0.084	0.079	0.0928889	1.08721	0.12063
gnl|gene46175|XL-9_2-gene46175|rna90819|	coq9.S	0.099	0.094	0.109	0.098	0.105	0.098	0.089	0.084	0.083	0.067	0.075	0.0954444	0.843434	-0.245652
gnl|gene48377|XL-9_2-gene48377|rna93942|	corin.S	0.094	0.089	0.112	0.084	0.111	0.1	0.092	0.075	0.103	0.063	0.077	0.0955556	0.946809	-0.0788554
gnl|gene39325|XL-9_2-gene39325|rna80867|	coro1c.L	0.095	0.095	0.105	0.106	0.095	0.097	0.089	0.09	0.081	0.076	0.072	0.0947778	0.9	-0.152003
gnl|gene7552|XL-9_2-gene7552|rna22003|	coro1c.S	0.084	0.097	0.087	0.095	0.085	0.09	0.091	0.103	0.093	0.091	0.084	0.0916667	1.16667	0.222392
gnl|gene44958|XL-9_2-gene44958|rna89109|	cotl1.L	0.11	0.096	0.118	0.096	0.103	0.1	0.089	0.077	0.083	0.059	0.07	0.0968889	0.727273	-0.459432
gnl|gene40593|XL-9_2-gene40593|rna82667|	cotl1.S	0.122	0.083	0.127	0.086	0.097	0.084	0.106	0.07	0.091	0.054	0.08	0.0962222	0.659836	-0.59982
gnl|gene9320|XL-9_2-gene9320|rna27098|	cox11.L	0.09	0.095	0.089	0.063	0.066	0.106	0.111	0.123	0.101	0.096	0.059	0.0937778	1.24444	0.315502
gnl|gene9246|XL-9_2-gene9246|rna26849|	cox15.S	0.081	0.096	0.075	0.091	0.088	0.091	0.097	0.103	0.094	0.098	0.087	0.0906667	1.21605	0.282202
gnl|gene17318|XL-9_2-gene17318|rna50544|	cox18.L	0.095	0.086	0.091	0.088	0.097	0.1	0.101	0.095	0.085	0.081	0.081	0.0931111	0.947368	-0.0780025
gnl|gene441|XL-9_2-gene441|rna1279|	cox20.L	0.09	0.101	0.084	0.103	0.088	0.091	0.09	0.103	0.084	0.091	0.074	0.0926667	1.03889	0.0550414
gnl|gene37272|XL-9_2-gene37272|rna77948|	cox4i1.S	0.096	0.089	0.091	0.102	0.099	0.084	0.093	0.086	0.095	0.086	0.079	0.0927778	0.942708	-0.0851166
gnl|gene16626|XL-9_2-gene16626|rna48574|	cox4i2.S	0.089	0.095	0.089	0.094	0.088	0.092	0.094	0.097	0.102	0.081	0.08	0.0933333	1.11798	0.160891
gnl|gene12184|XL-9_2-gene12184|rna35397|	cox5a.S	0.092	0.095	0.096	0.093	0.095	0.092	0.1	0.098	0.088	0.074	0.076	0.0943333	1.01087	0.0155969
gnl|gene6487|XL-9_2-gene6487|rna18977|	cox5b.1.L	0.108	0.095	0.126	0.116	0.112	0.113	0.07	0.077	0.075	0.051	0.058	0.0991111	0.703704	-0.50696
gnl|gene12725|XL-9_2-gene12725|rna36969|	cox5b.1.S	0.113	0.102	0.114	0.108	0.093	0.096	0.087	0.085	0.076	0.053	0.073	0.0971111	0.712389	-0.489262
gnl|gene20163|XL-9_2-gene20163|rna58838|	cox5b.2.L	0.094	0.092	0.097	0.082	0.097	0.094	0.094	0.094	0.106	0.07	0.079	0.0944444	1.06383	0.0892673
gnl|gene11977|XL-9_2-gene11977|rna34791|	cox6a1.L	0.11	0.101	0.097	0.104	0.11	0.102	0.08	0.078	0.074	0.07	0.074	0.0951111	0.690909	-0.533432
gnl|gene13299|XL-9_2-gene13299|rna38706|	cox6a1.S	0.094	0.113	0.075	0.111	0.099	0.103	0.078	0.087	0.074	0.086	0.08	0.0926667	0.856383	-0.223672
gnl|gene6544|XL-9_2-gene6544|rna19157|	cox6b1.L	0.081	0.116	0.1	0.136	0.081	0.093	0.077	0.062	0.114	0.069	0.072	0.0955556	1.08642	0.119582
gnl|gene2454|XL-9_2-gene2454|rna7142|	cox6b1.S	0.093	0.102	0.08	0.098	0.077	0.095	0.083	0.104	0.071	0.092	0.106	0.0892222	0.94086	-0.0879477
gnl|gene3317|XL-9_2-gene3317|rna9624|	cox6c.L	0.096	0.1	0.097	0.106	0.092	0.099	0.096	0.096	0.078	0.074	0.066	0.0955556	0.90625	-0.142019
gnl|gene46031|XL-9_2-gene46031|rna90638|	cox6c.S	0.084	0.097	0.094	0.124	0.092	0.085	0.085	0.068	0.118	0.071	0.08	0.0941111	1.10714	0.146841
gnl|gene11536|XL-9_2-gene11536|rna33497|	cox7a2.L	0.103	0.093	0.108	0.091	0.099	0.088	0.095	0.084	0.093	0.067	0.077	0.0948889	0.859223	-0.218895
gnl|gene14512|XL-9_2-gene14512|rna42260|	cox7a2l.L	0.103	0.094	0.108	0.096	0.094	0.097	0.078	0.091	0.083	0.078	0.078	0.0937778	0.84466	-0.243557
gnl|gene6627|XL-9_2-gene6627|rna19379|	cox7b.S	0.09	0.1	0.124	0.106	0.099	0.099	0.087	0.082	0.081	0.066	0.065	0.0964444	0.905556	-0.143125
gnl|gene7867|XL-9_2-gene7867|rna22947|	cox7c.S	0.117	0.076	0.124	0.079	0.119	0.067	0.102	0.07	0.097	0.057	0.093	0.0945556	0.713675	-0.48666
gnl|gene39902|XL-9_2-gene39902|rna81684|	cp.L	0.109	0.107	0.11	0.087	0.097	0.092	0.083	0.08	0.083	0.08	0.073	0.0942222	0.747706	-0.419456
gnl|gene39071|XL-9_2-gene39071|rna80526|	cpb2.L	0.09	0.083	0.095	0.068	0.108	0.108	0.094	0.073	0.118	0.068	0.097	0.093	1.06111	0.0855757
gnl|gene20211|XL-9_2-gene20211|rna58999|	cpd.L	0.099	0.104	0.102	0.099	0.109	0.104	0.083	0.081	0.082	0.066	0.073	0.0958889	0.823232	-0.280628
gnl|gene47127|XL-9_2-gene47127|rna92154|	cpd.S	0.099	0.087	0.102	0.099	0.107	0.089	0.08	0.089	0.086	0.072	0.09	0.0931111	0.883838	-0.178146
gnl|gene9917|XL-9_2-gene9917|rna28836|	cpeb1.S	0.306	0.223	0.098	0.045	0.036	0.033	0.031	0.027	0.031	0.025	0.145	0.0922222	0.0947712	-3.39941
gnl|gene8848|XL-9_2-gene8848|rna25773|	cpne1.L	0.089	0.095	0.089	0.103	0.092	0.096	0.09	0.09	0.098	0.079	0.078	0.0935556	1.05618	0.0788554
gnl|gene20331|XL-9_2-gene20331|rna59383|	cpne1.S	0.088	0.09	0.092	0.09	0.092	0.094	0.093	0.094	0.091	0.085	0.089	0.0915556	1.05114	0.0719498
gnl|gene47951|XL-9_2-gene47951|rna93309|	cpne3.S	0.087	0.081	0.09	0.083	0.092	0.085	0.103	0.1	0.1	0.09	0.089	0.0912222	1.14943	0.200913
gnl|gene40370|XL-9_2-gene40370|rna82336|	cpox.L	0.08	0.097	0.075	0.081	0.086	0.086	0.086	0.104	0.093	0.104	0.109	0.0875556	1.23125	0.300124
gnl|gene18094|XL-9_2-gene18094|rna52881|	cpped1.L	0.089	0.089	0.068	0.088	0.098	0.081	0.103	0.099	0.089	0.102	0.094	0.0893333	1.05618	0.0788554
gnl|gene16307|XL-9_2-gene16307|rna47622|	cpq.L	0.115	0.087	0.08	0.098	0.096	0.093	0.098	0.091	0.08	0.086	0.077	0.0931111	0.743478	-0.427638
gnl|gene18711|XL-9_2-gene18711|rna54614|	cpsf2.L	0.079	0.077	0.08	0.087	0.079	0.086	0.096	0.095	0.089	0.116	0.117	0.0853333	1.16456	0.219781
gnl|gene46940|XL-9_2-gene46940|rna91919|	cpsf2.S	0.093	0.099	0.081	0.09	0.079	0.091	0.098	0.105	0.104	0.09	0.07	0.0933333	1.12366	0.1682
gnl|gene17058|XL-9_2-gene17058|rna49832|	cpsf3.L	0.093	0.089	0.088	0.097	0.098	0.094	0.094	0.089	0.089	0.082	0.086	0.0923333	0.956989	-0.0634254
gnl|gene18361|XL-9_2-gene18361|rna53640|	cpsf3.S	0.09	0.085	0.086	0.088	0.096	0.088	0.102	0.095	0.101	0.086	0.084	0.0923333	1.08889	0.122857
gnl|gene3451|XL-9_2-gene3451|rna10034|	cpsf4.L	0.103	0.07	0.109	0.082	0.103	0.092	0.096	0.088	0.1	0.078	0.08	0.0936667	0.912621	-0.131912
gnl|gene9757|XL-9_2-gene9757|rna28373|	cpsf4l.S	0.111	0.102	0.09	0.101	0.101	0.083	0.092	0.083	0.081	0.07	0.085	0.0937778	0.738739	-0.436864
gnl|gene15401|XL-9_2-gene15401|rna44945|	cpsf6.S	0.086	0.06	0.093	0.082	0.087	0.082	0.104	0.095	0.118	0.09	0.103	0.0896667	1.23837	0.308445
gnl|gene19761|XL-9_2-gene19761|rna57727|	cpsf7.S	0.097	0.087	0.082	0.077	0.099	0.078	0.085	0.088	0.103	0.1	0.104	0.0884444	0.984536	-0.022484
gnl|gene14941|XL-9_2-gene14941|rna43611|	cpt1al.S	0.087	0.093	0.085	0.081	0.082	0.086	0.1	0.102	0.106	0.09	0.088	0.0913333	1.1954	0.257496
gnl|gene1806|XL-9_2-gene1806|rna5262|	cpt2.S	0.093	0.106	0.086	0.086	0.09	0.088	0.09	0.095	0.086	0.091	0.09	0.0911111	0.973118	-0.0393129
gnl|gene18005|XL-9_2-gene18005|rna52621|	cpvl.L	0.082	0.095	0.082	0.083	0.083	0.082	0.107	0.112	0.093	0.092	0.088	0.091	1.25	0.321928
gnl|gene9016|XL-9_2-gene9016|rna26252|	cramp1.L	0.104	0.098	0.111	0.108	0.097	0.087	0.083	0.078	0.079	0.081	0.073	0.0938889	0.754808	-0.405819
gnl|gene19324|XL-9_2-gene19324|rna56449|	crat.L	0.101	0.095	0.105	0.093	0.098	0.105	0.084	0.088	0.082	0.077	0.071	0.0945556	0.841584	-0.248821
gnl|gene1104|XL-9_2-gene1104|rna3210|	crat.S	0.09	0.094	0.097	0.091	0.096	0.096	0.086	0.088	0.087	0.088	0.086	0.0916667	0.972222	-0.040642
gnl|gene17659|XL-9_2-gene17659|rna51608|	crata.L	0.1	0.097	0.097	0.096	0.097	0.096	0.089	0.086	0.086	0.081	0.074	0.0937778	0.86	-0.217591
gnl|gene5504|XL-9_2-gene5504|rna16119|	crbn.L	0.089	0.09	0.077	0.088	0.098	0.082	0.099	0.089	0.093	0.094	0.101	0.0894444	1.02247	0.0320612
gnl|gene13438|XL-9_2-gene13438|rna39109|	creg1.L	0.1	0.08	0.109	0.099	0.111	0.086	0.089	0.073	0.09	0.073	0.088	0.093	0.815	-0.295128
gnl|gene18052|XL-9_2-gene18052|rna52768|	creld1.L	0.096	0.09	0.084	0.099	0.087	0.088	0.1	0.093	0.096	0.085	0.083	0.0925556	0.984375	-0.0227201
gnl|gene4030|XL-9_2-gene4030|rna11717|	creld2.L	0.095	0.087	0.102	0.104	0.1	0.101	0.089	0.09	0.092	0.071	0.069	0.0955556	0.957895	-0.062061
gnl|gene5467|XL-9_2-gene5467|rna16025|	creld2.S	0.07	0.073	0.065	0.065	0.077	0.075	0.112	0.111	0.124	0.108	0.121	0.0857778	1.67857	0.747234
gnl|gene558|XL-9_2-gene558|rna1611|	crip3.L	0.113	0.101	0.106	0.111	0.107	0.105	0.087	0.08	0.07	0.056	0.066	0.0977778	0.663717	-0.59136
gnl|gene5881|XL-9_2-gene5881|rna17218|	crk.L	0.087	0.092	0.081	0.082	0.09	0.085	0.093	0.09	0.091	0.105	0.107	0.0878889	1.04023	0.0569024
gnl|gene11346|XL-9_2-gene11346|rna32986|	crkl.L	0.077	0.058	0.062	0.077	0.086	0.104	0.1	0.122	0.104	0.124	0.086	0.0877778	1.46753	0.553392
gnl|gene2575|XL-9_2-gene2575|rna7480|	crlf3.L	0.094	0.09	0.1	0.105	0.097	0.101	0.093	0.086	0.089	0.068	0.079	0.095	0.930851	-0.103378
gnl|gene17279|XL-9_2-gene17279|rna50422|	crnkl1.S	0.089	0.095	0.088	0.091	0.085	0.088	0.099	0.1	0.088	0.09	0.087	0.0914444	1.05618	0.0788554
gnl|gene9248|XL-9_2-gene9248|rna26857|	crot.S	0.1	0.085	0.105	0.093	0.091	0.1	0.092	0.089	0.09	0.074	0.082	0.0938889	0.895	-0.16004
gnl|gene2443|XL-9_2-gene2443|rna7112|	crp.1.L	0.084	0.087	0.075	0.078	0.085	0.079	0.107	0.11	0.103	0.097	0.096	0.0897778	1.26786	0.342392
gnl|gene5654|XL-9_2-gene5654|rna16565|	crp.4.L	0.101	0.091	0.119	0.1	0.1	0.096	0.092	0.084	0.081	0.064	0.071	0.096	0.816832	-0.291889
gnl|gene18054|XL-9_2-gene18054|rna52774|	crtap.L	0.093	0.093	0.098	0.089	0.098	0.093	0.093	0.088	0.088	0.083	0.085	0.0925556	0.946237	-0.0797272
gnl|gene4831|XL-9_2-gene4831|rna14116|	crybg1.L	0.089	0.099	0.098	0.094	0.098	0.105	0.084	0.091	0.081	0.081	0.08	0.0932222	0.966292	-0.0494687
gnl|gene4622|XL-9_2-gene4622|rna13479|	crybg1.S	0.092	0.086	0.109	0.099	0.102	0.099	0.09	0.083	0.089	0.072	0.079	0.0943333	0.934783	-0.0972972
gnl|gene46214|XL-9_2-gene46214|rna90875|	cry-dash.L	0.086	0.094	0.081	0.091	0.091	0.092	0.094	0.096	0.089	0.095	0.09	0.0904444	1.07558	0.105117
gnl|gene10673|XL-9_2-gene10673|rna31011|	cryl1.L	0.064	0.068	0.073	0.05	0.065	0.054	0.132	0.127	0.128	0.113	0.128	0.0845556	1.99219	0.994353
gnl|gene50247|XL-9_2-gene50247|rna96645|	cryl1.S	0.106	0.083	0.115	0.108	0.086	0.097	0.089	0.074	0.074	0.078	0.09	0.0924444	0.698113	-0.518467
gnl|gene2522|XL-9_2-gene2522|rna7343|	cryz.L	0.048	0.044	0.046	0.051	0.052	0.053	0.093	0.096	0.073	0.215	0.23	0.0617778	1.76042	0.815917
gnl|gene15290|XL-9_2-gene15290|rna44634|	cryzl1.L	0.083	0.084	0.078	0.076	0.08	0.081	0.097	0.115	0.09	0.114	0.1	0.0871111	1.23494	0.304441
gnl|gene45463|XL-9_2-gene45463|rna89836|	cs.L	0.046	0.046	0.043	0.045	0.046	0.052	0.115	0.112	0.103	0.194	0.199	0.0675556	2.33696	1.22463
gnl|gene11895|XL-9_2-gene11895|rna34545|	cs.S	0.096	0.102	0.099	0.098	0.1	0.099	0.083	0.087	0.081	0.077	0.078	0.0938889	0.875	-0.192645
gnl|gene16932|XL-9_2-gene16932|rna49475|	csde1.L	0.093	0.092	0.091	0.094	0.093	0.086	0.094	0.094	0.09	0.086	0.087	0.0918889	0.989247	-0.0155969
gnl|gene18464|XL-9_2-gene18464|rna53923|	csde1.S	0.063	0.062	0.082	0.071	0.072	0.077	0.108	0.115	0.104	0.117	0.129	0.0837778	1.7381	0.797507
gnl|gene18548|XL-9_2-gene18548|rna54157|	cse1l.L	0.096	0.097	0.098	0.101	0.1	0.099	0.089	0.086	0.084	0.074	0.075	0.0944444	0.885417	-0.175572
gnl|gene2019|XL-9_2-gene2019|rna5867|	cse1l.S	0.099	0.105	0.102	0.1	0.102	0.105	0.081	0.082	0.079	0.075	0.071	0.095	0.813131	-0.29844
gnl|gene7365|XL-9_2-gene7365|rna21492|	csk.L	0.108	0.09	0.1	0.092	0.099	0.099	0.094	0.085	0.086	0.073	0.074	0.0947778	0.791667	-0.337035
gnl|gene763|XL-9_2-gene763|rna2221|	csnk1a1.L	0.106	0.082	0.088	0.092	0.109	0.096	0.088	0.083	0.097	0.078	0.081	0.0934444	0.849057	-0.236067
gnl|gene1295|XL-9_2-gene1295|rna3773|	csnk1g1.L	0.084	0.073	0.09	0.09	0.096	0.103	0.091	0.099	0.096	0.094	0.085	0.0913333	1.16071	0.215013
gnl|gene49548|XL-9_2-gene49548|rna95570|	csnk2a1.S	0.093	0.08	0.079	0.077	0.088	0.079	0.091	0.084	0.097	0.114	0.117	0.0853333	0.973118	-0.0393129
gnl|gene3815|XL-9_2-gene3815|rna11122|	csnk2a2.L	0.083	0.09	0.083	0.083	0.082	0.081	0.09	0.092	0.087	0.115	0.114	0.0856667	1.07831	0.108776
gnl|gene11568|XL-9_2-gene11568|rna33596|	csnk2a2.S	0.08	0.057	0.068	0.08	0.1	0.088	0.119	0.088	0.119	0.086	0.115	0.0887778	1.29375	0.371559
gnl|gene12702|XL-9_2-gene12702|rna36896|	csnk2b.L	0.081	0.071	0.08	0.079	0.081	0.083	0.103	0.104	0.078	0.117	0.122	0.0844444	1.12346	0.167945
gnl|gene16941|XL-9_2-gene16941|rna49496|	cspp1.L	0.077	0.079	0.093	0.094	0.095	0.095	0.091	0.087	0.095	0.1	0.094	0.0895556	1.18182	0.241008
gnl|gene38000|XL-9_2-gene38000|rna78992|	csrp2.L	0.091	0.09	0.105	0.101	0.102	0.102	0.092	0.086	0.084	0.072	0.075	0.0947778	0.934066	-0.0984037
gnl|gene20457|XL-9_2-gene20457|rna59749|	csrp2.S	0.11	0.087	0.12	0.105	0.099	0.098	0.088	0.085	0.083	0.062	0.063	0.0972222	0.763636	-0.389042
gnl|gene10296|XL-9_2-gene10296|rna29922|	cst3.L	0.092	0.097	0.111	0.112	0.113	0.131	0.077	0.074	0.074	0.063	0.056	0.0978889	0.804348	-0.314109
gnl|gene13376|XL-9_2-gene13376|rna38908|	cst3.S	0.027	0.036	0.046	0.063	0.082	0.101	0.123	0.132	0.164	0.142	0.084	0.086	5.48148	2.45457
gnl|gene5595|XL-9_2-gene5595|rna16377|	cst7.L	0.096	0.091	0.093	0.094	0.096	0.092	0.097	0.093	0.088	0.083	0.078	0.0933333	0.942708	-0.0851166
gnl|gene18604|XL-9_2-gene18604|rna54311|	cstf1.S	0.083	0.069	0.07	0.079	0.077	0.066	0.115	0.107	0.108	0.106	0.123	0.086	1.29518	0.373153
gnl|gene5997|XL-9_2-gene5997|rna17546|	cstf2.L	0.099	0.094	0.101	0.102	0.096	0.094	0.094	0.087	0.083	0.074	0.077	0.0944444	0.858586	-0.219966
gnl|gene5143|XL-9_2-gene5143|rna15044|	cstf3.S	0.087	0.084	0.091	0.097	0.1	0.105	0.081	0.099	0.089	0.087	0.08	0.0925556	1.08046	0.111645
gnl|gene17504|XL-9_2-gene17504|rna51124|	ctbp2.S	0.077	0.097	0.067	0.084	0.079	0.121	0.084	0.118	0.093	0.109	0.072	0.0911111	1.37013	0.454313
gnl|gene40860|XL-9_2-gene40860|rna83035|	ctbp2l.S	0.086	0.081	0.08	0.077	0.082	0.086	0.095	0.09	0.083	0.116	0.123	0.0844444	1.00581	0.00836347
gnl|gene13180|XL-9_2-gene13180|rna38332|	ctbs.L	0.091	0.099	0.091	0.083	0.09	0.088	0.103	0.1	0.091	0.079	0.085	0.0928889	1.04945	0.0696342
gnl|gene15879|XL-9_2-gene15879|rna46394|	ctbs.S	0.084	0.088	0.089	0.095	0.086	0.091	0.095	0.1	0.096	0.091	0.086	0.0915556	1.16667	0.222392
gnl|gene6956|XL-9_2-gene6956|rna20309|	ctdnep1.L	0.089	0.083	0.092	0.097	0.089	0.099	0.092	0.091	0.102	0.083	0.085	0.0926667	1.08427	0.116724
gnl|gene2555|XL-9_2-gene2555|rna7431|	ctdp1.L	0.086	0.085	0.096	0.089	0.098	0.1	0.093	0.095	0.094	0.084	0.081	0.0928889	1.09884	0.135978
gnl|gene6068|XL-9_2-gene6068|rna17755|	ctdp1.S	0.076	0.084	0.101	0.088	0.076	0.098	0.101	0.095	0.091	0.116	0.075	0.09	1.22368	0.291231
gnl|gene1035|XL-9_2-gene1035|rna3027|	cth.L	0.097	0.091	0.105	0.09	0.098	0.096	0.089	0.085	0.086	0.08	0.083	0.093	0.881443	-0.18206
gnl|gene13424|XL-9_2-gene13424|rna39061|	ctif.L	0.062	0.11	0.094	0.146	0.078	0.093	0.077	0.061	0.119	0.077	0.084	0.0933333	1.45161	0.537657
gnl|gene7711|XL-9_2-gene7711|rna22519|	ctnna1.L	0.09	0.081	0.082	0.087	0.091	0.091	0.088	0.089	0.093	0.106	0.102	0.088	1.01111	0.0159415
gnl|gene18287|XL-9_2-gene18287|rna53417|	ctnna1.S	0.083	0.061	0.062	0.08	0.078	0.08	0.079	0.111	0.125	0.166	0.077	0.0843333	1.42169	0.507604
gnl|gene5453|XL-9_2-gene5453|rna15983|	ctnnb1.L	0.064	0.051	0.078	0.088	0.097	0.109	0.105	0.118	0.107	0.107	0.077	0.0907778	1.75781	0.813781
gnl|gene34606|XL-9_2-gene34606|rna74215|	ctnnbip1.L	0.068	0.073	0.082	0.088	0.092	0.101	0.112	0.103	0.106	0.105	0.069	0.0916667	1.53676	0.619896
gnl|gene12628|XL-9_2-gene12628|rna36691|	ctnnbl1.S	0.09	0.091	0.091	0.089	0.093	0.097	0.098	0.088	0.098	0.078	0.088	0.0927778	1.03333	0.0473057
gnl|gene46749|XL-9_2-gene46749|rna91641|	ctnnd1.L	0.125	0.108	0.135	0.095	0.089	0.092	0.069	0.078	0.081	0.063	0.064	0.0968889	0.636	-0.652901
gnl|gene5660|XL-9_2-gene5660|rna16580|	ctps1.S	0.096	0.098	0.094	0.089	0.09	0.091	0.082	0.083	0.078	0.1	0.099	0.089	0.838542	-0.254046
gnl|gene39429|XL-9_2-gene39429|rna81006|	ctps2.L	0.096	0.09	0.097	0.086	0.106	0.1	0.091	0.086	0.094	0.078	0.077	0.094	0.9375	-0.0931094
gnl|gene18099|XL-9_2-gene18099|rna52898|	ctr9.L	0.094	0.092	0.097	0.095	0.095	0.096	0.094	0.091	0.086	0.077	0.082	0.0933333	0.941489	-0.0869833
gnl|gene16221|XL-9_2-gene16221|rna47394|	ctr9.S	0.078	0.09	0.07	0.06	0.094	0.066	0.112	0.11	0.11	0.095	0.114	0.0877778	1.41026	0.495957
gnl|gene7029|XL-9_2-gene7029|rna20523|	ctsa.L	0.091	0.088	0.096	0.081	0.094	0.072	0.11	0.089	0.095	0.092	0.094	0.0906667	1.01099	0.0157673
gnl|gene2902|XL-9_2-gene2902|rna8422|	ctsb.L	0.044	0.027	0.051	0.065	0.079	0.102	0.105	0.125	0.151	0.15	0.101	0.0832222	3.13636	1.64909
gnl|gene15301|XL-9_2-gene15301|rna44670|	ctsb.S	0.129	0.068	0.104	0.059	0.073	0.094	0.07	0.086	0.109	0.11	0.099	0.088	0.755814	-0.403897
gnl|gene9348|XL-9_2-gene9348|rna27187|	ctsc.L	0.088	0.091	0.093	0.097	0.091	0.089	0.09	0.089	0.09	0.088	0.094	0.0908889	1.01705	0.0243842
gnl|gene13322|XL-9_2-gene13322|rna38779|	ctsc.S	0.081	0.099	0.088	0.107	0.084	0.089	0.084	0.081	0.104	0.091	0.091	0.0907778	1.14198	0.191531
gnl|gene4639|XL-9_2-gene4639|rna13539|	ctsd.S	0.081	0.097	0.086	0.104	0.083	0.083	0.097	0.093	0.109	0.083	0.084	0.0925556	1.24691	0.318361
gnl|gene13520|XL-9_2-gene13520|rna39344|	ctsv.L	0.031	0.033	0.064	0.081	0.123	0.151	0.11	0.118	0.127	0.097	0.065	0.0931111	3.95161	1.98244
gnl|gene41168|XL-9_2-gene41168|rna83496|	cttn.L	0.115	0.106	0.119	0.097	0.091	0.093	0.078	0.082	0.081	0.069	0.069	0.0957778	0.708696	-0.496762
gnl|gene7376|XL-9_2-gene7376|rna21517|	ctu1.L	0.096	0.091	0.094	0.092	0.094	0.098	0.091	0.093	0.09	0.08	0.082	0.0932222	0.953125	-0.0692627
gnl|gene20249|XL-9_2-gene20249|rna59116|	ctu2.L	0.074	0.086	0.092	0.075	0.084	0.093	0.1	0.106	0.111	0.096	0.083	0.0912222	1.46622	0.552098
gnl|gene5971|XL-9_2-gene5971|rna17463|	cuedc2.S	0.074	0.075	0.094	0.094	0.091	0.113	0.091	0.089	0.103	0.094	0.082	0.0915556	1.2973	0.375509
gnl|gene19692|XL-9_2-gene19692|rna57552|	cul1.L	0.09	0.103	0.097	0.107	0.099	0.098	0.084	0.086	0.084	0.076	0.076	0.0942222	0.944444	-0.0824622
gnl|gene339|XL-9_2-gene339|rna981|	cul2.L	0.089	0.098	0.09	0.098	0.094	0.093	0.082	0.084	0.082	0.095	0.095	0.09	0.932584	-0.100694
gnl|gene14063|XL-9_2-gene14063|rna40962|	cul2.S	0.091	0.087	0.083	0.099	0.099	0.098	0.095	0.09	0.092	0.084	0.082	0.0926667	1	0
gnl|gene2513|XL-9_2-gene2513|rna7308|	cul3.L	0.088	0.097	0.086	0.086	0.087	0.092	0.083	0.091	0.082	0.106	0.103	0.088	0.982955	-0.0248034
gnl|gene3843|XL-9_2-gene3843|rna11209|	cul4a.L	0.088	0.089	0.093	0.091	0.097	0.1	0.092	0.093	0.085	0.086	0.087	0.092	1.01136	0.0163018
gnl|gene14927|XL-9_2-gene14927|rna43572|	cul4a.S	0.113	0.113	0.105	0.091	0.098	0.099	0.073	0.08	0.071	0.084	0.073	0.0936667	0.668142	-0.581774
gnl|gene8002|XL-9_2-gene8002|rna23333|	cul4b.L	0.081	0.083	0.077	0.08	0.085	0.09	0.098	0.107	0.097	0.104	0.098	0.0886667	1.25926	0.332575
gnl|gene10416|XL-9_2-gene10416|rna30272|	cul4b.S	0.09	0.108	0.085	0.096	0.104	0.078	0.084	0.079	0.069	0.096	0.111	0.0881111	0.822222	-0.2824
gnl|gene10755|XL-9_2-gene10755|rna31259|	cul5.L	0.094	0.098	0.098	0.088	0.111	0.095	0.087	0.076	0.092	0.073	0.088	0.0932222	0.893617	-0.162271
gnl|gene47371|XL-9_2-gene47371|rna92503|	cul5.S	0.095	0.092	0.092	0.098	0.095	0.094	0.093	0.093	0.088	0.079	0.082	0.0933333	0.952632	-0.0700097
gnl|gene5133|XL-9_2-gene5133|rna15018|	cul9.L	0.092	0.097	0.092	0.095	0.097	0.101	0.088	0.091	0.083	0.082	0.081	0.0928889	0.945652	-0.0806185
gnl|gene5967|XL-9_2-gene5967|rna17451|	cutc.L	0.081	0.081	0.095	0.092	0.085	0.091	0.079	0.089	0.075	0.116	0.117	0.0853333	1.01235	0.017702
gnl|gene34453|XL-9_2-gene34453|rna74028|	cux1.L	0.085	0.08	0.086	0.113	0.098	0.103	0.091	0.079	0.099	0.08	0.086	0.0926667	1.04706	0.0663425
gnl|gene6224|XL-9_2-gene6224|rna18186|	cwc15.L	0.096	0.101	0.108	0.105	0.1	0.111	0.087	0.087	0.075	0.071	0.059	0.0966667	0.84375	-0.245112
gnl|gene18006|XL-9_2-gene18006|rna52626|	cwc22.S	0.055	0.052	0.058	0.054	0.062	0.057	0.12	0.124	0.101	0.16	0.158	0.0758889	2.04545	1.03242
gnl|gene3408|XL-9_2-gene3408|rna9921|	cwc27.S	0.1	0.104	0.102	0.077	0.079	0.085	0.079	0.086	0.074	0.112	0.102	0.0873333	0.8	-0.321928
gnl|gene8564|XL-9_2-gene8564|rna24914|	cwf19l1.L	0.09	0.087	0.092	0.093	0.096	0.097	0.089	0.092	0.084	0.091	0.089	0.0911111	0.977778	-0.0324215
gnl|gene48522|XL-9_2-gene48522|rna94124|	cxadr.L	0.085	0.081	0.102	0.096	0.104	0.104	0.09	0.089	0.093	0.078	0.078	0.0937778	1.07059	0.0984037
gnl|gene4706|XL-9_2-gene4706|rna13745|	cxadr.S	0.092	0.08	0.083	0.098	0.099	0.092	0.098	0.086	0.097	0.08	0.096	0.0916667	0.994565	-0.00786212
gnl|gene16844|XL-9_2-gene16844|rna49217|	cyb5a.L	0.092	0.112	0.074	0.108	0.088	0.108	0.087	0.112	0.078	0.084	0.058	0.0954444	1.03261	0.0462937
gnl|gene2704|XL-9_2-gene2704|rna7842|	cyb5a.S	0.093	0.1	0.07	0.07	0.09	0.08	0.098	0.09	0.09	0.099	0.12	0.0867778	0.967742	-0.0473057
gnl|gene50407|XL-9_2-gene50407|rna96907|	cyb5r3.L	0.079	0.093	0.082	0.1	0.08	0.087	0.096	0.096	0.104	0.091	0.091	0.0907778	1.26582	0.340075
gnl|gene42681|XL-9_2-gene42681|rna85704|	cyb5r3.S	0.106	0.08	0.103	0.091	0.116	0.088	0.089	0.085	0.098	0.064	0.081	0.0951111	0.863208	-0.212221
gnl|gene17434|XL-9_2-gene17434|rna50921|	cyb5r4.S	0.11	0.121	0.117	0.091	0.092	0.103	0.079	0.08	0.073	0.067	0.065	0.0962222	0.695455	-0.523972
gnl|gene4675|XL-9_2-gene4675|rna13655|	cybc1.L	0.085	0.095	0.067	0.076	0.083	0.075	0.097	0.102	0.106	0.114	0.099	0.0873333	1.22353	0.291049
gnl|gene16801|XL-9_2-gene16801|rna49091|	cyc1.L	0.101	0.098	0.098	0.103	0.095	0.101	0.085	0.086	0.089	0.072	0.071	0.0951111	0.866337	-0.207
gnl|gene17623|XL-9_2-gene17623|rna51493|	cycs.L	0.081	0.098	0.093	0.101	0.094	0.103	0.075	0.091	0.081	0.099	0.084	0.0907778	1.06173	0.0864148
gnl|gene10952|XL-9_2-gene10952|rna31834|	cyct.L	0.084	0.088	0.109	0.098	0.1	0.1	0.091	0.091	0.088	0.074	0.077	0.0943333	1.06548	0.0914984
gnl|gene35959|XL-9_2-gene35959|rna76099|	cyfip1.L	0.09	0.08	0.088	0.086	0.099	0.1	0.099	0.099	0.09	0.084	0.085	0.0923333	1.05	0.0703893
gnl|gene11883|XL-9_2-gene11883|rna34507|	cyfip1.S	0.097	0.084	0.096	0.101	0.098	0.098	0.084	0.078	0.095	0.087	0.082	0.0923333	0.891753	-0.165285
gnl|gene4839|XL-9_2-gene4839|rna14144|	cyld.S	0.086	0.09	0.085	0.09	0.088	0.095	0.097	0.099	0.094	0.089	0.087	0.0915556	1.12209	0.166192
gnl|gene4312|XL-9_2-gene4312|rna12570|	cyp11a1.S	0.26	0.058	0.207	0.127	0.037	0.025	0.045	0.033	0.025	0.044	0.14	0.0907778	0.111538	-3.16439
gnl|gene632|XL-9_2-gene632|rna1844|	cyp17a1.L	0.159	0.13	0.138	0.118	0.103	0.098	0.066	0.052	0.038	0.023	0.074	0.100222	0.283019	-1.82103
gnl|gene7843|XL-9_2-gene7843|rna22878|	cyp20a1.L	0.095	0.094	0.098	0.096	0.095	0.097	0.091	0.088	0.089	0.079	0.079	0.0936667	0.931579	-0.10225
gnl|gene13549|XL-9_2-gene13549|rna39434|	cyp27c1.S	0.077	0.081	0.079	0.091	0.092	0.088	0.083	0.086	0.078	0.117	0.128	0.0838889	1.06494	0.0907655
gnl|gene15293|XL-9_2-gene15293|rna44648|	cyp2a6.2.S	0.109	0.099	0.104	0.116	0.089	0.1	0.074	0.087	0.083	0.072	0.066	0.0956667	0.779817	-0.358793
gnl|gene10000|XL-9_2-gene10000|rna29070|	cyp2c8.1.L	0.08	0.094	0.069	0.071	0.108	0.083	0.098	0.087	0.111	0.104	0.095	0.089	1.2375	0.307429
gnl|gene10168|XL-9_2-gene10168|rna29560|	cyp2e1.L	0.093	0.079	0.084	0.095	0.095	0.092	0.099	0.096	0.09	0.083	0.094	0.0914444	1	0
gnl|gene42387|XL-9_2-gene42387|rna85277|	cyp3a4.1.L	0.087	0.074	0.1	0.086	0.098	0.087	0.124	0.087	0.101	0.075	0.081	0.0937778	1.08046	0.111645
gnl|gene2490|XL-9_2-gene2490|rna7253|	cyp4v2.1.L	0.085	0.081	0.078	0.095	0.098	0.092	0.099	0.093	0.092	0.091	0.095	0.0903333	1.08824	0.121991
gnl|gene10898|XL-9_2-gene10898|rna31684|	cyp51a1.L	0.089	0.101	0.1	0.101	0.099	0.111	0.083	0.091	0.079	0.079	0.067	0.0948889	0.955056	-0.0663425
gnl|gene35165|XL-9_2-gene35165|rna75009|	cyp51a1.S	0.11	0.087	0.108	0.097	0.09	0.089	0.092	0.095	0.093	0.069	0.07	0.0956667	0.854545	-0.226771
gnl|gene18751|XL-9_2-gene18751|rna54737|	cyp8b1.1.S	0.098	0.089	0.105	0.099	0.107	0.096	0.088	0.081	0.085	0.074	0.08	0.0942222	0.846939	-0.23967
gnl|gene6110|XL-9_2-gene6110|rna17873|	cyria.L	0.088	0.101	0.109	0.061	0.087	0.083	0.103	0.102	0.101	0.073	0.092	0.0927778	1.15341	0.205904
gnl|gene4128|XL-9_2-gene4128|rna12020|	cyria.S	0.085	0.09	0.082	0.085	0.088	0.081	0.105	0.097	0.102	0.097	0.089	0.0905556	1.17059	0.227234
gnl|gene14857|XL-9_2-gene14857|rna43362|	cyrib.S	0.079	0.082	0.082	0.077	0.081	0.08	0.105	0.109	0.107	0.102	0.097	0.0891111	1.36709	0.451107
gnl|gene12884|XL-9_2-gene12884|rna37444|	cyth1.S	0.088	0.085	0.077	0.073	0.093	0.085	0.125	0.114	0.08	0.103	0.077	0.0911111	1.10227	0.140481
gnl|gene7522|XL-9_2-gene7522|rna21927|	cyth2.L	0.081	0.091	0.1	0.1	0.113	0.096	0.09	0.097	0.09	0.069	0.073	0.0953333	1.15432	0.207044
gnl|gene48315|XL-9_2-gene48315|rna93854|	czib.L	0.108	0.085	0.104	0.084	0.086	0.077	0.102	0.095	0.104	0.076	0.079	0.0938889	0.921296	-0.118263
gnl|gene8026|XL-9_2-gene8026|rna23395|	d2hgdh.S	0.088	0.084	0.089	0.088	0.092	0.088	0.098	0.092	0.097	0.088	0.095	0.0906667	1.07386	0.102811
gnl|gene13956|XL-9_2-gene13956|rna40625|	dact1.L	0.094	0.111	0.081	0.105	0.095	0.084	0.081	0.084	0.08	0.095	0.089	0.0905556	0.87234	-0.197037
gnl|gene17906|XL-9_2-gene17906|rna52342|	dad1.L	0.089	0.102	0.083	0.106	0.104	0.108	0.087	0.098	0.078	0.074	0.07	0.095	0.988764	-0.0163018
gnl|gene12750|XL-9_2-gene12750|rna37044|	dad1.S	0.102	0.084	0.111	0.103	0.11	0.106	0.09	0.085	0.081	0.068	0.06	0.0968889	0.813725	-0.297386
gnl|gene9821|XL-9_2-gene9821|rna28555|	dalrd3.L	0.088	0.092	0.101	0.082	0.09	0.101	0.096	0.094	0.094	0.071	0.09	0.0931111	1.06818	0.0951572
gnl|gene14982|XL-9_2-gene14982|rna43725|	dao.L	0.092	0.098	0.093	0.103	0.094	0.096	0.088	0.093	0.082	0.084	0.077	0.0932222	0.951087	-0.0723508
gnl|gene12591|XL-9_2-gene12591|rna36594|	dap.L	0.128	0.123	0.137	0.083	0.089	0.085	0.067	0.074	0.07	0.072	0.072	0.0951111	0.5625	-0.830075
gnl|gene11403|XL-9_2-gene11403|rna33138|	dap.S	0.1	0.091	0.096	0.092	0.093	0.102	0.093	0.086	0.098	0.074	0.076	0.0945556	0.92	-0.120294
gnl|gene17695|XL-9_2-gene17695|rna51715|	dap3.L	0.096	0.08	0.088	0.076	0.104	0.089	0.099	0.089	0.1	0.079	0.1	0.0912222	0.984375	-0.0227201
gnl|gene3365|XL-9_2-gene3365|rna9777|	dapl1.S	0.103	0.121	0.1	0.097	0.107	0.097	0.071	0.07	0.082	0.076	0.078	0.0942222	0.737864	-0.438573
gnl|gene1780|XL-9_2-gene1780|rna5160|	dars1.L	0.087	0.092	0.084	0.087	0.087	0.081	0.094	0.092	0.095	0.1	0.1	0.0887778	1.07471	0.103951
gnl|gene3013|XL-9_2-gene3013|rna8728|	dars1.S	0.087	0.082	0.085	0.084	0.093	0.084	0.105	0.097	0.105	0.087	0.092	0.0913333	1.16092	0.215268
gnl|gene12837|XL-9_2-gene12837|rna37303|	dars2.L	0.096	0.093	0.098	0.097	0.1	0.097	0.089	0.084	0.087	0.078	0.081	0.0934444	0.890625	-0.16711
gnl|gene15002|XL-9_2-gene15002|rna43776|	daw1.S	0.101	0.088	0.092	0.085	0.106	0.104	0.093	0.082	0.097	0.076	0.075	0.0942222	0.886139	-0.174396
gnl|gene17769|XL-9_2-gene17769|rna51933|	daxx.L	0.101	0.094	0.116	0.086	0.099	0.085	0.084	0.089	0.094	0.074	0.077	0.0942222	0.905941	-0.142512
gnl|gene10997|XL-9_2-gene10997|rna31967|	dazap1.L	0.089	0.083	0.093	0.103	0.095	0.097	0.091	0.093	0.095	0.085	0.076	0.0932222	1.05618	0.0788554
gnl|gene6419|XL-9_2-gene6419|rna18791|	dazap1.S	0.098	0.098	0.088	0.1	0.107	0.094	0.093	0.077	0.096	0.072	0.077	0.0945556	0.882653	-0.180082
gnl|gene44626|XL-9_2-gene44626|rna88627|	dbf4b.L	0.041	0.044	0.072	0.083	0.102	0.106	0.092	0.118	0.135	0.119	0.087	0.0881111	3.08537	1.62544
gnl|gene2805|XL-9_2-gene2805|rna8152|	dbi.L	0.087	0.091	0.086	0.099	0.094	0.09	0.09	0.087	0.104	0.084	0.088	0.092	1.0977	0.134485
gnl|gene43739|XL-9_2-gene43739|rna87269|	dbi.S	0.091	0.09	0.087	0.083	0.092	0.097	0.104	0.095	0.097	0.076	0.087	0.0928889	1.05495	0.0771679
gnl|gene16469|XL-9_2-gene16469|rna48116|	dbn1.L	0.132	0.078	0.115	0.102	0.083	0.074	0.079	0.082	0.081	0.071	0.103	0.0917778	0.617424	-0.695666
gnl|gene9281|XL-9_2-gene9281|rna26953|	dbn1.S	0.129	0.076	0.133	0.108	0.088	0.085	0.07	0.08	0.084	0.056	0.09	0.0947778	0.635659	-0.653675
gnl|gene2174|XL-9_2-gene2174|rna6306|	dbnl.L	0.095	0.088	0.105	0.098	0.102	0.094	0.091	0.087	0.094	0.069	0.077	0.0948889	0.952632	-0.0700097
gnl|gene1874|XL-9_2-gene1874|rna5473|	dbnl.S	0.087	0.092	0.091	0.1	0.109	0.095	0.084	0.08	0.092	0.083	0.087	0.0922222	0.988506	-0.0166787
gnl|gene3385|XL-9_2-gene3385|rna9844|	dbr1.L	0.036	0.033	0.036	0.038	0.053	0.08	0.091	0.126	0.179	0.212	0.116	0.0746667	4.23611	2.08274
gnl|gene9483|XL-9_2-gene9483|rna27575|	dbt.L	0.074	0.088	0.089	0.088	0.087	0.094	0.094	0.101	0.083	0.109	0.094	0.0886667	1.24324	0.314109
gnl|gene42745|XL-9_2-gene42745|rna85790|	dbt.S	0.073	0.085	0.084	0.084	0.087	0.089	0.098	0.098	0.085	0.116	0.1	0.087	1.25342	0.325875
gnl|gene34649|XL-9_2-gene34649|rna74285|	dcaf1.L	0.097	0.091	0.099	0.097	0.098	0.096	0.084	0.084	0.093	0.071	0.091	0.0932222	0.912371	-0.132307
gnl|gene3879|XL-9_2-gene3879|rna11301|	dcaf1.S	0.074	0.067	0.098	0.074	0.077	0.082	0.084	0.083	0.074	0.139	0.148	0.0792222	1.06081	0.0851674
gnl|gene10867|XL-9_2-gene10867|rna31596|	dcaf10.S	0.096	0.086	0.113	0.094	0.106	0.094	0.09	0.08	0.081	0.075	0.084	0.0933333	0.838542	-0.254046
gnl|gene7893|XL-9_2-gene7893|rna23025|	dcaf13.L	0.1	0.129	0.09	0.091	0.09	0.103	0.078	0.084	0.078	0.079	0.078	0.0936667	0.81	-0.304006
gnl|gene12318|XL-9_2-gene12318|rna35803|	dcaf8.S	0.109	0.121	0.111	0.108	0.101	0.099	0.08	0.073	0.063	0.06	0.076	0.0961111	0.623853	-0.680721
gnl|gene9920|XL-9_2-gene9920|rna28842|	dck.1l.L	0.07	0.073	0.064	0.081	0.088	0.11	0.096	0.121	0.104	0.116	0.077	0.0896667	1.60714	0.684498
gnl|gene34771|XL-9_2-gene34771|rna74448|	dck.2.L	0.041	0.049	0.062	0.047	0.065	0.057	0.141	0.137	0.121	0.153	0.127	0.08	3.14634	1.65368
gnl|gene2397|XL-9_2-gene2397|rna6981|	dclre1a.L	0.095	0.074	0.094	0.097	0.099	0.099	0.082	0.077	0.091	0.099	0.092	0.0897778	0.884211	-0.177538
gnl|gene2816|XL-9_2-gene2816|rna8180|	dclre1c.S	0.073	0.066	0.084	0.087	0.079	0.099	0.108	0.114	0.107	0.1	0.081	0.0907778	1.5137	0.598078
gnl|gene1563|XL-9_2-gene1563|rna4551|	dcp1b.L	0.066	0.062	0.07	0.068	0.082	0.083	0.105	0.13	0.133	0.113	0.087	0.0887778	1.99242	0.994525
gnl|gene44610|XL-9_2-gene44610|rna88599|	dcp1b.S	0.093	0.085	0.1	0.081	0.095	0.091	0.096	0.095	0.1	0.081	0.082	0.0928889	1.04839	0.0681715
gnl|gene19754|XL-9_2-gene19754|rna57709|	dcp2.S	0.09	0.09	0.085	0.092	0.108	0.076	0.098	0.081	0.106	0.088	0.087	0.0917778	1.03889	0.0550414
gnl|gene36178|XL-9_2-gene36178|rna76409|	dcps.L	0.098	0.082	0.105	0.087	0.101	0.088	0.098	0.089	0.096	0.076	0.081	0.0937778	0.943878	-0.0833284
gnl|gene6307|XL-9_2-gene6307|rna18439|	dct.L	0.095	0.085	0.097	0.102	0.096	0.103	0.079	0.087	0.089	0.082	0.086	0.0925556	0.926316	-0.110424
gnl|gene10424|XL-9_2-gene10424|rna30298|	dctd.L	0.07	0.072	0.07	0.069	0.07	0.073	0.106	0.114	0.103	0.128	0.125	0.083	1.55	0.632268
gnl|gene14485|XL-9_2-gene14485|rna42175|	dctn1.L	0.094	0.092	0.098	0.096	0.092	0.097	0.085	0.084	0.081	0.09	0.089	0.091	0.87766	-0.188267
gnl|gene20120|XL-9_2-gene20120|rna58712|	dctn1.S	0.091	0.091	0.096	0.094	0.097	0.098	0.093	0.093	0.092	0.078	0.077	0.0938889	1.01648	0.0235868
gnl|gene7252|XL-9_2-gene7252|rna21164|	dctn2.L	0.068	0.072	0.055	0.068	0.073	0.063	0.099	0.103	0.107	0.148	0.143	0.0786667	1.54412	0.626783
gnl|gene16242|XL-9_2-gene16242|rna47440|	dctn2.S	0.108	0.107	0.106	0.089	0.088	0.086	0.088	0.086	0.082	0.078	0.082	0.0933333	0.777778	-0.36257
gnl|gene19477|XL-9_2-gene19477|rna56924|	dctn3.L	0.104	0.098	0.096	0.091	0.092	0.09	0.093	0.086	0.086	0.082	0.081	0.0928889	0.826923	-0.274175
gnl|gene891|XL-9_2-gene891|rna2615|	dctn3.S	0.097	0.09	0.105	0.093	0.1	0.096	0.079	0.08	0.085	0.078	0.096	0.0916667	0.850515	-0.233591
gnl|gene40499|XL-9_2-gene40499|rna82521|	dctn4.L	0.074	0.083	0.075	0.083	0.079	0.088	0.095	0.109	0.099	0.108	0.108	0.0872222	1.40541	0.490986
gnl|gene13384|XL-9_2-gene13384|rna38939|	dctn4.S	0.096	0.09	0.095	0.087	0.096	0.094	0.096	0.093	0.091	0.077	0.085	0.0931111	0.958333	-0.0614005
gnl|gene39527|XL-9_2-gene39527|rna81139|	dctn5.S	0.088	0.101	0.092	0.107	0.094	0.104	0.086	0.097	0.079	0.082	0.07	0.0942222	1	0
gnl|gene8311|XL-9_2-gene8311|rna24202|	dctn6.L	0.087	0.085	0.086	0.086	0.088	0.085	0.087	0.079	0.086	0.114	0.117	0.0854444	0.948276	-0.0766213
gnl|gene7012|XL-9_2-gene7012|rna20475|	dcun1d1.S	0.085	0.096	0.071	0.084	0.095	0.092	0.091	0.084	0.089	0.106	0.107	0.0874444	1.01765	0.0252373
gnl|gene5029|XL-9_2-gene5029|rna14689|	dcun1d2.L	0.089	0.082	0.078	0.077	0.094	0.1	0.096	0.091	0.104	0.092	0.097	0.0901111	1.09551	0.131597
gnl|gene9854|XL-9_2-gene9854|rna28641|	dcun1d5.S	0.085	0.088	0.09	0.099	0.095	0.104	0.083	0.108	0.09	0.081	0.077	0.0935556	1.16471	0.219966
gnl|gene43413|XL-9_2-gene43413|rna86796|	dcxr.L	0.092	0.1	0.088	0.095	0.09	0.1	0.09	0.089	0.087	0.087	0.082	0.0923333	0.956522	-0.0641303
gnl|gene38056|XL-9_2-gene38056|rna79058|	dda1.L	0.085	0.093	0.096	0.103	0.108	0.117	0.078	0.075	0.088	0.089	0.068	0.0936667	0.958824	-0.0606628
gnl|gene45458|XL-9_2-gene45458|rna89830|	ddah1.S	0.079	0.077	0.075	0.07	0.083	0.074	0.097	0.093	0.098	0.127	0.128	0.0828889	1.20886	0.273648
gnl|gene5982|XL-9_2-gene5982|rna17502|	ddah2.L	0.116	0.101	0.106	0.085	0.104	0.089	0.087	0.076	0.086	0.073	0.075	0.0944444	0.698276	-0.518131
gnl|gene3546|XL-9_2-gene3546|rna10321|	ddb1.S	0.086	0.084	0.081	0.085	0.087	0.085	0.096	0.097	0.095	0.1	0.104	0.0884444	1.11628	0.158698
gnl|gene7895|XL-9_2-gene7895|rna23031|	ddhd1.L	0.096	0.096	0.105	0.085	0.103	0.098	0.087	0.085	0.092	0.074	0.078	0.0941111	0.921875	-0.117357
gnl|gene39848|XL-9_2-gene39848|rna81610|	ddhd2.L	0.088	0.081	0.097	0.101	0.101	0.104	0.087	0.083	0.088	0.081	0.09	0.0922222	0.971591	-0.0415791
gnl|gene46812|XL-9_2-gene46812|rna91739|	ddi2.L	0.095	0.094	0.091	0.086	0.083	0.085	0.092	0.09	0.091	0.092	0.1	0.0896667	0.952632	-0.0700097
gnl|gene6968|XL-9_2-gene6968|rna20346|	ddo.L	0.093	0.067	0.101	0.086	0.103	0.103	0.109	0.096	0.09	0.078	0.073	0.0942222	1	0
gnl|gene37680|XL-9_2-gene37680|rna78472|	ddost.L	0.081	0.079	0.081	0.084	0.087	0.084	0.104	0.106	0.094	0.098	0.102	0.0888889	1.23457	0.304006
gnl|gene7120|XL-9_2-gene7120|rna20790|	ddost.S	0.069	0.065	0.057	0.067	0.061	0.072	0.117	0.13	0.103	0.138	0.12	0.0823333	1.68841	0.755662
gnl|gene40633|XL-9_2-gene40633|rna82727|	ddrgk1.L	0.094	0.101	0.096	0.09	0.103	0.095	0.087	0.085	0.085	0.086	0.08	0.0928889	0.904255	-0.145198
gnl|gene4826|XL-9_2-gene4826|rna14094|	ddx1.L	0.084	0.082	0.086	0.077	0.083	0.076	0.107	0.105	0.102	0.097	0.102	0.0891111	1.23214	0.30117
gnl|gene37087|XL-9_2-gene37087|rna77698|	ddx10.S	0.111	0.099	0.13	0.108	0.095	0.103	0.071	0.069	0.08	0.056	0.079	0.0962222	0.671171	-0.575247
gnl|gene36580|XL-9_2-gene36580|rna76974|	ddx11.L	0.09	0.086	0.102	0.092	0.109	0.099	0.088	0.083	0.079	0.084	0.089	0.092	0.9	-0.152003
gnl|gene16551|XL-9_2-gene16551|rna48351|	ddx17.L	0.1	0.071	0.09	0.098	0.103	0.096	0.093	0.094	0.093	0.085	0.078	0.0931111	0.935	-0.0969617
gnl|gene14177|XL-9_2-gene14177|rna41289|	ddx18.L	0.133	0.1	0.109	0.112	0.1	0.087	0.076	0.075	0.068	0.059	0.081	0.0955556	0.537594	-0.895411
gnl|gene48285|XL-9_2-gene48285|rna93811|	ddx18.S	0.132	0.115	0.106	0.106	0.108	0.092	0.08	0.073	0.068	0.052	0.068	0.0977778	0.534091	-0.904843
gnl|gene19492|XL-9_2-gene19492|rna56964|	ddx19b.L	0.08	0.078	0.09	0.087	0.098	0.102	0.096	0.099	0.102	0.091	0.077	0.0924444	1.25625	0.329124
gnl|gene44915|XL-9_2-gene44915|rna89038|	ddx19b.S	0.093	0.082	0.091	0.098	0.099	0.101	0.1	0.1	0.083	0.083	0.071	0.0941111	0.983871	-0.023459
gnl|gene12383|XL-9_2-gene12383|rna36012|	ddx20.L	0.093	0.086	0.096	0.09	0.095	0.088	0.092	0.085	0.093	0.086	0.096	0.0908889	0.956989	-0.0634254
gnl|gene11970|XL-9_2-gene11970|rna34774|	ddx21.L	0.119	0.129	0.155	0.129	0.112	0.113	0.061	0.055	0.039	0.033	0.056	0.101333	0.394958	-1.34023
gnl|gene35661|XL-9_2-gene35661|rna75717|	ddx21.S	0.126	0.115	0.114	0.115	0.096	0.081	0.085	0.061	0.05	0.042	0.113	0.0936667	0.440476	-1.18286
gnl|gene9509|XL-9_2-gene9509|rna27652|	ddx23.S	0.092	0.085	0.09	0.088	0.096	0.094	0.09	0.085	0.089	0.094	0.096	0.0898889	0.945652	-0.0806185
gnl|gene19643|XL-9_2-gene19643|rna57401|	ddx24.L	0.114	0.106	0.107	0.087	0.081	0.078	0.097	0.074	0.064	0.068	0.124	0.0897778	0.605263	-0.724366
gnl|gene11519|XL-9_2-gene11519|rna33456|	ddx25.L	0.178	0.155	0.145	0.117	0.102	0.074	0.056	0.042	0.029	0.023	0.081	0.0997778	0.199438	-2.32599
gnl|gene36740|XL-9_2-gene36740|rna77182|	ddx27.L	0.129	0.123	0.11	0.094	0.093	0.081	0.083	0.074	0.073	0.059	0.08	0.0955556	0.569767	-0.811555
gnl|gene2415|XL-9_2-gene2415|rna7037|	ddx28.L	0.094	0.092	0.095	0.093	0.099	0.107	0.093	0.081	0.092	0.073	0.082	0.094	0.920213	-0.119961
gnl|gene13485|XL-9_2-gene13485|rna39231|	ddx39a.S	0.073	0.072	0.066	0.069	0.085	0.074	0.101	0.104	0.115	0.121	0.121	0.0843333	1.5	0.584963
gnl|gene20261|XL-9_2-gene20261|rna59149|	ddx39b.L	0.083	0.075	0.067	0.074	0.083	0.08	0.117	0.107	0.11	0.094	0.11	0.0884444	1.30723	0.386512
gnl|gene529|XL-9_2-gene529|rna1505|	ddx3x.L	0.096	0.087	0.098	0.096	0.096	0.097	0.087	0.085	0.084	0.087	0.088	0.0917778	0.880208	-0.184083
gnl|gene16823|XL-9_2-gene16823|rna49170|	ddx4.L	0.101	0.104	0.09	0.085	0.09	0.086	0.092	0.091	0.084	0.085	0.093	0.0914444	0.866337	-0.207
gnl|gene36694|XL-9_2-gene36694|rna77129|	ddx4.S	0.109	0.111	0.09	0.084	0.089	0.08	0.097	0.095	0.076	0.074	0.096	0.0923333	0.784404	-0.350332
gnl|gene15478|XL-9_2-gene15478|rna45184|	ddx41.L	0.096	0.084	0.093	0.093	0.099	0.097	0.096	0.093	0.087	0.08	0.081	0.0931111	0.9375	-0.0931094
gnl|gene523|XL-9_2-gene523|rna1484|	ddx42.L	0.086	0.079	0.088	0.092	0.093	0.101	0.087	0.1	0.096	0.088	0.09	0.0913333	1.13953	0.188445
gnl|gene3449|XL-9_2-gene3449|rna10030|	ddx42.S	0.092	0.081	0.091	0.095	0.095	0.098	0.091	0.099	0.094	0.085	0.078	0.0928889	1.04891	0.0688951
gnl|gene5729|XL-9_2-gene5729|rna16769|	ddx43.L	0.096	0.092	0.088	0.097	0.1	0.091	0.092	0.09	0.093	0.078	0.083	0.0932222	0.953125	-0.0692627
gnl|gene40858|XL-9_2-gene40858|rna83032|	ddx46.L	0.095	0.09	0.098	0.094	0.095	0.103	0.088	0.092	0.086	0.083	0.075	0.0934444	0.936842	-0.0941222
gnl|gene4257|XL-9_2-gene4257|rna12402|	ddx47.S	0.199	0.121	0.116	0.106	0.098	0.079	0.062	0.05	0.057	0.039	0.071	0.0986667	0.268844	-1.89516
gnl|gene40535|XL-9_2-gene40535|rna82580|	ddx49.S	0.147	0.135	0.127	0.112	0.099	0.078	0.061	0.053	0.055	0.044	0.088	0.0963333	0.367347	-1.44478
gnl|gene5879|XL-9_2-gene5879|rna17213|	ddx5.L	0.107	0.074	0.098	0.108	0.11	0.099	0.088	0.08	0.085	0.073	0.077	0.0943333	0.771028	-0.375145
gnl|gene41485|XL-9_2-gene41485|rna83946|	ddx5.S	0.096	0.085	0.099	0.112	0.114	0.116	0.08	0.075	0.078	0.069	0.076	0.095	0.796875	-0.327575
gnl|gene11192|XL-9_2-gene11192|rna32523|	ddx51.L	0.095	0.085	0.101	0.1	0.088	0.107	0.097	0.084	0.085	0.078	0.079	0.0935556	0.889474	-0.168976
gnl|gene7642|XL-9_2-gene7642|rna22280|	ddx54.L	0.152	0.137	0.118	0.104	0.097	0.075	0.049	0.069	0.057	0.045	0.096	0.0953333	0.414474	-1.27065
gnl|gene19568|XL-9_2-gene19568|rna57178|	ddx55.S	0.14	0.132	0.134	0.109	0.091	0.08	0.064	0.062	0.056	0.049	0.083	0.0964444	0.421429	-1.24664
gnl|gene6227|XL-9_2-gene6227|rna18192|	ddx56.L	0.119	0.126	0.084	0.055	0.064	0.06	0.088	0.124	0.127	0.059	0.094	0.0941111	1.05462	0.0767258
gnl|gene6855|XL-9_2-gene6855|rna20038|	ddx59.L	0.092	0.096	0.096	0.104	0.1	0.102	0.087	0.084	0.086	0.076	0.077	0.0941111	0.923913	-0.114171
gnl|gene15717|XL-9_2-gene15717|rna45884|	ddx6.L	0.092	0.096	0.086	0.096	0.095	0.092	0.091	0.087	0.086	0.086	0.092	0.0912222	0.940217	-0.0889337
gnl|gene14340|XL-9_2-gene14340|rna41768|	ddx6.S	0.091	0.094	0.094	0.099	0.093	0.098	0.089	0.09	0.087	0.082	0.084	0.0927778	0.972527	-0.0401891
gnl|gene15037|XL-9_2-gene15037|rna43876|	decr1.L	0.096	0.088	0.094	0.085	0.09	0.086	0.095	0.095	0.096	0.081	0.094	0.0916667	0.994792	-0.00753367
gnl|gene40638|XL-9_2-gene40638|rna82737|	decr2.L	0.081	0.096	0.082	0.08	0.079	0.093	0.1	0.107	0.085	0.102	0.095	0.0892222	1.18519	0.245112
gnl|gene35126|XL-9_2-gene35126|rna74947|	degs1.S	0.091	0.088	0.1	0.112	0.101	0.099	0.097	0.079	0.087	0.078	0.069	0.0948889	0.912088	-0.132755
gnl|gene6585|XL-9_2-gene6585|rna19272|	dek.L	0.081	0.079	0.09	0.085	0.089	0.094	0.096	0.098	0.097	0.094	0.096	0.0898889	1.2037	0.26748
gnl|gene6850|XL-9_2-gene6850|rna20022|	dennd11.L	0.074	0.086	0.088	0.078	0.09	0.092	0.111	0.085	0.103	0.089	0.102	0.0896667	1.27027	0.345135
gnl|gene43227|XL-9_2-gene43227|rna86529|	dennd1a.S	0.093	0.088	0.119	0.105	0.107	0.097	0.082	0.082	0.088	0.066	0.073	0.0956667	0.913978	-0.129768
gnl|gene36393|XL-9_2-gene36393|rna76712|	dennd4a.L	0.052	0.106	0.075	0.022	0.019	0.08	0.165	0.14	0.121	0.11	0.111	0.0866667	2.50962	1.32747
gnl|gene7100|XL-9_2-gene7100|rna20731|	dennd4c.L	0.105	0.087	0.1	0.088	0.1	0.1	0.096	0.077	0.088	0.075	0.083	0.0934444	0.785714	-0.347923
gnl|gene18613|XL-9_2-gene18613|rna54332|	dennd4c.S	0.099	0.09	0.095	0.099	0.095	0.096	0.086	0.082	0.08	0.093	0.086	0.0913333	0.818182	-0.289507
gnl|gene11355|XL-9_2-gene11355|rna33008|	dennd5b.L	0.099	0.1	0.099	0.094	0.101	0.102	0.079	0.082	0.096	0.06	0.088	0.0946667	0.89899	-0.153623
gnl|gene40819|XL-9_2-gene40819|rna82986|	dennd6a.L	0.093	0.091	0.099	0.097	0.107	0.106	0.087	0.082	0.094	0.076	0.07	0.0951111	0.946237	-0.0797272
gnl|gene12557|XL-9_2-gene12557|rna36507|	denr.L	0.097	0.094	0.096	0.099	0.099	0.106	0.094	0.089	0.09	0.069	0.068	0.096	0.92268	-0.116097
gnl|gene49123|XL-9_2-gene49123|rna94975|	denr.S	0.093	0.093	0.095	0.098	0.101	0.105	0.087	0.091	0.091	0.072	0.075	0.0948889	0.978495	-0.0313642
gnl|gene42782|XL-9_2-gene42782|rna85832|	depdc1.L	0.097	0.088	0.11	0.094	0.095	0.11	0.092	0.08	0.077	0.066	0.09	0.0936667	0.809278	-0.305292
gnl|gene7789|XL-9_2-gene7789|rna22738|	depdc7.L	0.072	0.046	0.049	0.061	0.11	0.1	0.102	0.123	0.143	0.095	0.099	0.0895556	1.84722	0.885357
gnl|gene3055|XL-9_2-gene3055|rna8847|	depdc7.S	0.061	0.064	0.089	0.103	0.105	0.103	0.102	0.121	0.094	0.09	0.068	0.0935556	1.7623	0.817456
gnl|gene7879|XL-9_2-gene7879|rna22993|	deptorl.S	0.098	0.101	0.094	0.088	0.09	0.089	0.084	0.08	0.081	0.101	0.095	0.0894444	0.821429	-0.283793
gnl|gene35559|XL-9_2-gene35559|rna75573|	derl2l.L	0.086	0.072	0.066	0.085	0.101	0.079	0.094	0.093	0.115	0.101	0.109	0.0878889	1.2093	0.274175
gnl|gene46430|XL-9_2-gene46430|rna91196|	dffa.L	0.092	0.091	0.102	0.092	0.108	0.097	0.095	0.081	0.089	0.071	0.08	0.0941111	0.923913	-0.114171
gnl|gene14809|XL-9_2-gene14809|rna43202|	dgat1.L	0.103	0.091	0.11	0.098	0.109	0.092	0.09	0.072	0.075	0.074	0.085	0.0933333	0.713592	-0.486828
gnl|gene5745|XL-9_2-gene5745|rna16811|	dgcr6.S	0.12	0.11	0.111	0.101	0.107	0.095	0.084	0.079	0.064	0.057	0.072	0.0967778	0.595833	-0.747019
gnl|gene4359|XL-9_2-gene4359|rna12695|	dgcr8.L	0.099	0.097	0.067	0.079	0.085	0.067	0.088	0.107	0.092	0.092	0.125	0.0867778	1.00505	0.007268
gnl|gene6844|XL-9_2-gene6844|rna20007|	dglucy.L	0.099	0.085	0.099	0.095	0.101	0.092	0.088	0.087	0.1	0.071	0.083	0.094	0.944444	-0.0824622
gnl|gene1431|XL-9_2-gene1431|rna4178|	dguok.L	0.095	0.095	0.093	0.095	0.096	0.099	0.093	0.093	0.093	0.075	0.074	0.0946667	0.978947	-0.0306968
gnl|gene10083|XL-9_2-gene10083|rna29313|	dhcr24.L	0.096	0.092	0.103	0.105	0.102	0.096	0.089	0.075	0.086	0.076	0.08	0.0937778	0.838542	-0.254046
gnl|gene16566|XL-9_2-gene16566|rna48397|	dhdh-like.1.L	0.084	0.093	0.086	0.088	0.093	0.096	0.089	0.087	0.086	0.099	0.099	0.0891111	1.02976	0.0423108
gnl|gene6045|XL-9_2-gene6045|rna17697|	dhfr.L	0.09	0.099	0.093	0.111	0.095	0.093	0.081	0.082	0.108	0.071	0.076	0.0946667	1.05556	0.0780025
gnl|gene604|XL-9_2-gene604|rna1771|	dhodh.L	0.095	0.096	0.103	0.097	0.094	0.095	0.09	0.088	0.087	0.076	0.078	0.0938889	0.921053	-0.118644
gnl|gene49071|XL-9_2-gene49071|rna94900|	dhrs11.L	0.093	0.088	0.107	0.096	0.094	0.093	0.094	0.094	0.087	0.085	0.07	0.094	0.973118	-0.0393129
gnl|gene17524|XL-9_2-gene17524|rna51170|	dhrs11.S	0.089	0.094	0.082	0.085	0.09	0.087	0.089	0.093	0.085	0.104	0.104	0.0882222	1	0
gnl|gene41454|XL-9_2-gene41454|rna83901|	dhrs12.L	0.084	0.084	0.083	0.081	0.09	0.086	0.096	0.098	0.092	0.102	0.106	0.0882222	1.13095	0.177538
gnl|gene47986|XL-9_2-gene47986|rna93350|	dhrs13.L	0.087	0.091	0.078	0.075	0.079	0.068	0.102	0.105	0.095	0.105	0.114	0.0866667	1.14943	0.200913
gnl|gene7671|XL-9_2-gene7671|rna22375|	dhrs4.L	0.089	0.094	0.09	0.102	0.09	0.102	0.089	0.099	0.081	0.086	0.078	0.0928889	1.01124	0.0161197
gnl|gene15725|XL-9_2-gene15725|rna45918|	dhrs7.L	0.084	0.096	0.078	0.08	0.09	0.082	0.083	0.075	0.08	0.125	0.127	0.0831111	0.922619	-0.116193
gnl|gene14951|XL-9_2-gene14951|rna43632|	dhrs7b.L	0.092	0.101	0.094	0.095	0.089	0.104	0.08	0.089	0.075	0.096	0.085	0.091	0.891304	-0.16601
gnl|gene50205|XL-9_2-gene50205|rna96590|	dhrsx.L	0.073	0.087	0.073	0.127	0.081	0.084	0.088	0.086	0.072	0.116	0.112	0.0856667	1.08219	0.113956
gnl|gene3070|XL-9_2-gene3070|rna8892|	dhtkd1.L	0.081	0.087	0.092	0.088	0.085	0.089	0.088	0.094	0.081	0.112	0.105	0.0872222	1.08025	0.111361
gnl|gene34330|XL-9_2-gene34330|rna73858|	dhx15.L	0.101	0.092	0.098	0.092	0.1	0.099	0.092	0.092	0.089	0.073	0.072	0.095	0.89604	-0.158366
gnl|gene20464|XL-9_2-gene20464|rna59767|	dhx15.S	0.087	0.086	0.081	0.086	0.09	0.083	0.1	0.094	0.095	0.1	0.1	0.0891111	1.08621	0.119299
gnl|gene100|XL-9_2-gene100|rna281|	dhx16.S	0.075	0.075	0.077	0.083	0.08	0.082	0.094	0.095	0.089	0.127	0.122	0.0833333	1.22667	0.294743
gnl|gene8765|XL-9_2-gene8765|rna25514|	dhx29.L	0.094	0.093	0.105	0.092	0.097	0.096	0.089	0.088	0.09	0.075	0.082	0.0937778	0.946809	-0.0788554
gnl|gene50349|XL-9_2-gene50349|rna96802|	dhx30.S	0.09	0.096	0.093	0.099	0.1	0.096	0.089	0.083	0.084	0.082	0.089	0.0922222	0.927778	-0.108149
gnl|gene9076|XL-9_2-gene9076|rna26416|	dhx32.L	0.094	0.091	0.094	0.1	0.106	0.087	0.075	0.082	0.105	0.07	0.097	0.0926667	0.994681	-0.00769439
gnl|gene11817|XL-9_2-gene11817|rna34312|	dhx34.L	0.087	0.088	0.078	0.094	0.101	0.119	0.09	0.091	0.077	0.088	0.087	0.0916667	0.965517	-0.0506261
gnl|gene6047|XL-9_2-gene6047|rna17701|	dhx35.S	0.087	0.072	0.099	0.097	0.101	0.103	0.088	0.096	0.097	0.09	0.07	0.0933333	1.1092	0.149514
gnl|gene36961|XL-9_2-gene36961|rna77519|	dhx36.L	0.129	0.123	0.106	0.09	0.086	0.079	0.064	0.065	0.068	0.095	0.095	0.09	0.515504	-0.955945
gnl|gene37870|XL-9_2-gene37870|rna78750|	dhx36.S	0.087	0.098	0.088	0.085	0.091	0.103	0.099	0.093	0.085	0.084	0.087	0.0921111	1.02299	0.0327899
gnl|gene38454|XL-9_2-gene38454|rna79604|	dhx37.L	0.09	0.096	0.087	0.084	0.088	0.092	0.085	0.093	0.086	0.095	0.105	0.089	0.994444	-0.00803732
gnl|gene17348|XL-9_2-gene17348|rna50639|	dhx38.L	0.074	0.08	0.083	0.081	0.086	0.096	0.1	0.107	0.101	0.091	0.1	0.0897778	1.40541	0.490986
gnl|gene43196|XL-9_2-gene43196|rna86480|	dhx38.S	0.105	0.093	0.111	0.103	0.084	0.088	0.087	0.091	0.09	0.078	0.071	0.0946667	0.861905	-0.2144
gnl|gene37796|XL-9_2-gene37796|rna78645|	dhx57.L	0.101	0.097	0.097	0.093	0.095	0.092	0.085	0.085	0.09	0.074	0.09	0.0927778	0.866337	-0.207
gnl|gene8068|XL-9_2-gene8068|rna23527|	dhx8.S	0.103	0.079	0.098	0.092	0.103	0.092	0.096	0.085	0.096	0.078	0.078	0.0937778	0.878641	-0.186655
gnl|gene5973|XL-9_2-gene5973|rna17467|	dhx9.L	0.08	0.078	0.082	0.086	0.095	0.089	0.1	0.1	0.101	0.089	0.098	0.0901111	1.25625	0.329124
gnl|gene45126|XL-9_2-gene45126|rna89359|	diablo.L	0.093	0.095	0.097	0.099	0.092	0.098	0.087	0.098	0.081	0.076	0.085	0.0933333	0.962366	-0.055343
gnl|gene47609|XL-9_2-gene47609|rna92820|	diablo.S	0.092	0.089	0.084	0.097	0.095	0.091	0.093	0.086	0.093	0.088	0.093	0.0911111	0.972826	-0.0397462
gnl|gene12752|XL-9_2-gene12752|rna37052|	diaph1.L	0.086	0.082	0.087	0.089	0.095	0.091	0.091	0.093	0.087	0.099	0.1	0.089	1.04651	0.0655883
gnl|gene37579|XL-9_2-gene37579|rna78345|	diaph3.L	0.079	0.08	0.087	0.088	0.097	0.097	0.096	0.093	0.095	0.1	0.088	0.0902222	1.18987	0.250808
gnl|gene2469|XL-9_2-gene2469|rna7196|	dicer1.L	0.088	0.089	0.087	0.09	0.087	0.088	0.091	0.095	0.096	0.096	0.094	0.0901111	1.08523	0.117997
gnl|gene17258|XL-9_2-gene17258|rna50373|	dicer1.S	0.108	0.101	0.092	0.095	0.096	0.106	0.085	0.08	0.076	0.079	0.081	0.0932222	0.722222	-0.469485
gnl|gene9844|XL-9_2-gene9844|rna28613|	dido1.L	0.102	0.066	0.087	0.095	0.117	0.112	0.088	0.08	0.076	0.101	0.076	0.0914444	0.764706	-0.387023
gnl|gene2925|XL-9_2-gene2925|rna8479|	dimt1.L	0.091	0.094	0.076	0.074	0.072	0.064	0.111	0.104	0.106	0.09	0.117	0.088	1.15385	0.206451
gnl|gene19729|XL-9_2-gene19729|rna57650|	dipk1a.S	0.093	0.102	0.091	0.097	0.093	0.107	0.086	0.086	0.086	0.079	0.081	0.0934444	0.924731	-0.112894
gnl|gene6461|XL-9_2-gene6461|rna18903|	dis3.L	0.097	0.096	0.094	0.092	0.094	0.096	0.095	0.091	0.092	0.076	0.078	0.0941111	0.943299	-0.084213
gnl|gene5326|XL-9_2-gene5326|rna15605|	dis3l.L	0.082	0.078	0.088	0.102	0.112	0.105	0.085	0.106	0.103	0.064	0.074	0.0956667	1.27439	0.349807
gnl|gene10175|XL-9_2-gene10175|rna29585|	disp1.L	0.116	0.098	0.101	0.111	0.111	0.12	0.093	0.064	0.071	0.046	0.069	0.0983333	0.581897	-0.781165
gnl|gene20159|XL-9_2-gene20159|rna58828|	dixdc1.L	0.097	0.095	0.095	0.1	0.104	0.111	0.083	0.084	0.074	0.074	0.083	0.0936667	0.814433	-0.296132
gnl|gene2015|XL-9_2-gene2015|rna5855|	dkc1.L	0.117	0.08	0.122	0.105	0.106	0.104	0.076	0.075	0.077	0.065	0.074	0.0957778	0.649573	-0.622437
gnl|gene7823|XL-9_2-gene7823|rna22833|	dlat.L	0.085	0.098	0.091	0.094	0.096	0.101	0.087	0.091	0.087	0.09	0.08	0.0922222	1.04706	0.0663425
gnl|gene43296|XL-9_2-gene43296|rna86623|	dld.L	0.071	0.07	0.069	0.061	0.071	0.063	0.124	0.109	0.118	0.112	0.133	0.084	1.59859	0.676801
gnl|gene6712|XL-9_2-gene6712|rna19656|	dld.S	0.076	0.086	0.073	0.085	0.083	0.084	0.1	0.1	0.102	0.102	0.107	0.0876667	1.32895	0.410284
gnl|gene12859|XL-9_2-gene12859|rna37378|	dlgap5.L	0.096	0.094	0.096	0.09	0.095	0.09	0.085	0.077	0.093	0.089	0.095	0.0906667	0.885417	-0.175572
gnl|gene18440|XL-9_2-gene18440|rna53857|	dlgap5.S	0.097	0.096	0.111	0.102	0.092	0.099	0.092	0.087	0.088	0.069	0.068	0.096	0.902062	-0.148702
gnl|gene47443|XL-9_2-gene47443|rna92597|	dlst.L	0.088	0.09	0.092	0.087	0.095	0.098	0.096	0.095	0.091	0.088	0.08	0.0924444	1.05682	0.0797272
gnl|gene17198|XL-9_2-gene17198|rna50217|	dlst.S	0.087	0.104	0.102	0.111	0.101	0.113	0.076	0.109	0.071	0.068	0.059	0.0971111	1.03448	0.0489096
gnl|gene47288|XL-9_2-gene47288|rna92373|	dmac2.L	0.098	0.118	0.107	0.087	0.093	0.118	0.075	0.069	0.073	0.084	0.079	0.0931111	0.72449	-0.464963
gnl|gene11802|XL-9_2-gene11802|rna34269|	dmac2l.L	0.093	0.09	0.093	0.107	0.108	0.103	0.074	0.077	0.115	0.071	0.069	0.0955556	1.03226	0.0458037
gnl|gene14750|XL-9_2-gene14750|rna43001|	dmap1.L	0.087	0.082	0.072	0.088	0.09	0.083	0.097	0.107	0.1	0.092	0.103	0.0895556	1.18966	0.250543
gnl|gene2865|XL-9_2-gene2865|rna8319|	dmgdh.L	0.084	0.082	0.091	0.088	0.089	0.088	0.092	0.092	0.091	0.101	0.103	0.0885556	1.08929	0.123382
gnl|gene18774|XL-9_2-gene18774|rna54803|	dmtf1.L	0.089	0.085	0.086	0.083	0.096	0.094	0.094	0.089	0.108	0.082	0.093	0.0915556	1.10674	0.146318
gnl|gene35016|XL-9_2-gene35016|rna74777|	dmxl1.L	0.081	0.09	0.092	0.093	0.089	0.106	0.103	0.094	0.082	0.088	0.084	0.0922222	1.08642	0.119582
gnl|gene47833|XL-9_2-gene47833|rna93100|	dmxl2.L	0.057	0.078	0.067	0.068	0.082	0.104	0.106	0.105	0.095	0.135	0.104	0.0846667	1.75439	0.810966
gnl|gene48563|XL-9_2-gene48563|rna94175|	dna2.S	0.086	0.077	0.09	0.083	0.098	0.091	0.093	0.084	0.087	0.104	0.108	0.0876667	0.994186	-0.00841224
gnl|gene744|XL-9_2-gene744|rna2167|	dnaaf1.S	0.071	0.087	0.083	0.096	0.082	0.095	0.098	0.1	0.1	0.093	0.094	0.0902222	1.40845	0.494109
gnl|gene9104|XL-9_2-gene9104|rna26490|	dnaaf2.L	0.092	0.1	0.098	0.099	0.099	0.108	0.082	0.085	0.087	0.076	0.074	0.0944444	0.934783	-0.0972972
gnl|gene14880|XL-9_2-gene14880|rna43424|	dnaaf3.L	0.094	0.088	0.092	0.094	0.102	0.094	0.092	0.096	0.089	0.079	0.079	0.0934444	0.984043	-0.0232074
gnl|gene4628|XL-9_2-gene4628|rna13508|	dnaaf5.L	0.086	0.095	0.084	0.093	0.098	0.094	0.09	0.088	0.09	0.093	0.088	0.0908889	1.03488	0.0494687
gnl|gene4125|XL-9_2-gene4125|rna12010|	dnaaf5.S	0.091	0.092	0.092	0.097	0.09	0.099	0.097	0.088	0.082	0.079	0.094	0.092	0.934066	-0.0984037
gnl|gene35143|XL-9_2-gene35143|rna74968|	dnah10.L	0.087	0.086	0.087	0.091	0.098	0.1	0.091	0.086	0.091	0.095	0.089	0.0907778	1.01724	0.0246621
gnl|gene44288|XL-9_2-gene44288|rna88119|	dnah5.L	0.075	0.087	0.093	0.092	0.106	0.115	0.087	0.094	0.093	0.084	0.075	0.0935556	1.24667	0.318076
gnl|gene40986|XL-9_2-gene40986|rna83229|	dnah9.S	0.087	0.093	0.095	0.091	0.098	0.098	0.092	0.096	0.093	0.082	0.076	0.0936667	1.08621	0.119299
gnl|gene12828|XL-9_2-gene12828|rna37282|	dnai1.L	0.088	0.09	0.084	0.078	0.097	0.093	0.093	0.092	0.098	0.094	0.094	0.0903333	1.07955	0.110424
gnl|gene2123|XL-9_2-gene2123|rna6165|	dnai4.S	0.091	0.083	0.116	0.097	0.106	0.103	0.104	0.108	0.075	0.061	0.056	0.0981111	1.00549	0.0079052
gnl|gene198|XL-9_2-gene198|rna558|	dnaja1.L	0.086	0.071	0.076	0.077	0.1	0.085	0.101	0.101	0.099	0.112	0.09	0.0884444	1.16279	0.217591
gnl|gene9115|XL-9_2-gene9115|rna26515|	dnaja1.S	0.078	0.084	0.078	0.083	0.095	0.114	0.095	0.106	0.096	0.098	0.072	0.0921111	1.29487	0.372809
gnl|gene43347|XL-9_2-gene43347|rna86704|	dnaja2.L	0.05	0.07	0.051	0.051	0.059	0.069	0.104	0.147	0.12	0.168	0.112	0.0801111	2.67	1.41684
gnl|gene15542|XL-9_2-gene15542|rna45388|	dnaja2.S	0.083	0.068	0.093	0.084	0.097	0.091	0.107	0.098	0.111	0.086	0.082	0.0924444	1.25904	0.33232
gnl|gene10878|XL-9_2-gene10878|rna31620|	dnaja3.L	0.091	0.084	0.096	0.087	0.089	0.105	0.09	0.098	0.097	0.085	0.079	0.093	1.07143	0.0995357
gnl|gene46565|XL-9_2-gene46565|rna91388|	dnaja3.S	0.075	0.071	0.072	0.082	0.093	0.095	0.092	0.094	0.099	0.118	0.11	0.0858889	1.28667	0.363638
gnl|gene11031|XL-9_2-gene11031|rna32079|	dnaja4.1.L	0.092	0.083	0.099	0.094	0.103	0.099	0.097	0.09	0.1	0.075	0.067	0.0952222	1.03261	0.0462937
gnl|gene20164|XL-9_2-gene20164|rna58840|	dnajb1.L	0.077	0.067	0.072	0.063	0.088	0.078	0.116	0.117	0.12	0.104	0.098	0.0886667	1.53896	0.621957
gnl|gene6247|XL-9_2-gene6247|rna18268|	dnajb11.S	0.069	0.069	0.07	0.069	0.084	0.08	0.112	0.12	0.127	0.106	0.095	0.0888889	1.78986	0.839843
gnl|gene1278|XL-9_2-gene1278|rna3718|	dnajb12.L	0.082	0.081	0.081	0.071	0.106	0.086	0.106	0.083	0.089	0.111	0.104	0.0872222	1.04878	0.0687128
gnl|gene5023|XL-9_2-gene5023|rna14676|	dnajb12.S	0.085	0.081	0.09	0.099	0.105	0.107	0.096	0.084	0.089	0.082	0.082	0.0928889	1.01765	0.0252373
gnl|gene17269|XL-9_2-gene17269|rna50401|	dnajb14.L	0.077	0.076	0.096	0.088	0.109	0.101	0.1	0.102	0.097	0.074	0.078	0.094	1.29221	0.369838
gnl|gene7585|XL-9_2-gene7585|rna22117|	dnajb6.L	0.073	0.078	0.081	0.103	0.096	0.118	0.079	0.094	0.095	0.094	0.089	0.0907778	1.29452	0.372418
gnl|gene2165|XL-9_2-gene2165|rna6283|	dnajc1.L	0.093	0.087	0.099	0.098	0.109	0.109	0.097	0.083	0.086	0.067	0.071	0.0956667	0.908602	-0.138279
gnl|gene9850|XL-9_2-gene9850|rna28633|	dnajc1.S	0.087	0.104	0.06	0.089	0.089	0.074	0.102	0.117	0.091	0.097	0.09	0.0903333	1.1954	0.257496
gnl|gene17674|XL-9_2-gene17674|rna51662|	dnajc10.S	0.093	0.091	0.103	0.109	0.109	0.099	0.089	0.071	0.078	0.082	0.075	0.0935556	0.801075	-0.31999
gnl|gene45100|XL-9_2-gene45100|rna89323|	dnajc11.L	0.092	0.09	0.099	0.096	0.101	0.099	0.091	0.084	0.09	0.077	0.083	0.0935556	0.945652	-0.0806185
gnl|gene37624|XL-9_2-gene37624|rna78400|	dnajc11.S	0.102	0.088	0.104	0.095	0.074	0.067	0.105	0.091	0.092	0.081	0.1	0.0908889	0.897059	-0.156726
gnl|gene4746|XL-9_2-gene4746|rna13864|	dnajc13.L	0.087	0.083	0.087	0.09	0.095	0.093	0.094	0.091	0.092	0.094	0.093	0.0902222	1.05172	0.0727563
gnl|gene13410|XL-9_2-gene13410|rna39011|	dnajc13.S	0.097	0.08	0.11	0.09	0.101	0.101	0.082	0.096	0.093	0.071	0.078	0.0944444	0.974227	-0.0376704
gnl|gene2360|XL-9_2-gene2360|rna6868|	dnajc15.L	0.092	0.088	0.1	0.102	0.104	0.102	0.087	0.096	0.083	0.075	0.072	0.0948889	0.972826	-0.0397462
gnl|gene13205|XL-9_2-gene13205|rna38427|	dnajc16.S	0.06	0.065	0.055	0.059	0.09	0.09	0.117	0.122	0.121	0.131	0.091	0.0865556	2.025	1.01792
gnl|gene11105|XL-9_2-gene11105|rna32272|	dnajc19.L	0.089	0.093	0.099	0.09	0.093	0.097	0.092	0.09	0.085	0.086	0.086	0.092	0.983146	-0.0245223
gnl|gene47649|XL-9_2-gene47649|rna92869|	dnajc2.L	0.083	0.077	0.082	0.079	0.081	0.082	0.097	0.097	0.098	0.111	0.113	0.0862222	1.1747	0.232291
gnl|gene18943|XL-9_2-gene18943|rna55300|	dnajc2.S	0.088	0.081	0.102	0.095	0.1	0.09	0.092	0.089	0.095	0.082	0.086	0.0924444	1.04545	0.0641303
gnl|gene15032|XL-9_2-gene15032|rna43864|	dnajc25.S	0.099	0.122	0.094	0.107	0.111	0.111	0.054	0.053	0.067	0.099	0.083	0.0908889	0.606061	-0.722466
gnl|gene8681|XL-9_2-gene8681|rna25273|	dnajc3.L	0.084	0.086	0.093	0.096	0.096	0.103	0.094	0.094	0.092	0.084	0.077	0.0931111	1.10714	0.146841
gnl|gene4962|XL-9_2-gene4962|rna14502|	dnajc5.S	0.109	0.091	0.102	0.091	0.106	0.096	0.094	0.087	0.085	0.066	0.074	0.0956667	0.788991	-0.34192
gnl|gene7224|XL-9_2-gene7224|rna21074|	dnajc7.L	0.091	0.097	0.094	0.107	0.095	0.102	0.088	0.097	0.089	0.073	0.068	0.0955556	1.02198	0.0313642
gnl|gene2801|XL-9_2-gene2801|rna8143|	dnajc7.S	0.093	0.093	0.099	0.101	0.1	0.104	0.09	0.09	0.084	0.075	0.072	0.0948889	0.935484	-0.0962153
gnl|gene18451|XL-9_2-gene18451|rna53884|	dnajc8.S	0.104	0.097	0.108	0.097	0.102	0.1	0.085	0.077	0.082	0.071	0.077	0.0946667	0.764423	-0.387557
gnl|gene9322|XL-9_2-gene9322|rna27102|	dnajc9.L	0.089	0.1	0.08	0.089	0.085	0.09	0.095	0.105	0.086	0.092	0.089	0.091	1.07303	0.101695
gnl|gene11744|XL-9_2-gene11744|rna34111|	dnal1.L	0.087	0.077	0.081	0.074	0.08	0.082	0.111	0.108	0.107	0.094	0.099	0.0896667	1.23563	0.305249
gnl|gene19799|XL-9_2-gene19799|rna57834|	dnal4.L	0.076	0.072	0.089	0.08	0.096	0.102	0.107	0.115	0.104	0.093	0.065	0.0934444	1.44079	0.52686
gnl|gene19242|XL-9_2-gene19242|rna56217|	dnase2.L	0.102	0.083	0.102	0.1	0.105	0.103	0.094	0.084	0.085	0.073	0.069	0.0953333	0.828431	-0.271546
gnl|gene36550|XL-9_2-gene36550|rna76934|	dnd1.L	0.129	0.08	0.075	0.071	0.079	0.085	0.079	0.104	0.09	0.101	0.108	0.088	0.751938	-0.411314
gnl|gene19885|XL-9_2-gene19885|rna58063|	dnm1.L	0.103	0.09	0.097	0.105	0.098	0.093	0.087	0.083	0.085	0.075	0.084	0.0934444	0.815534	-0.294183
gnl|gene34854|XL-9_2-gene34854|rna74545|	dnm1l.L	0.071	0.069	0.065	0.065	0.059	0.061	0.106	0.112	0.105	0.146	0.141	0.0792222	1.52817	0.611804
gnl|gene636|XL-9_2-gene636|rna1857|	dnm1l.S	0.104	0.095	0.106	0.094	0.097	0.091	0.092	0.087	0.086	0.07	0.077	0.0946667	0.831731	-0.265811
gnl|gene34424|XL-9_2-gene34424|rna73993|	dnm2.L	0.084	0.083	0.09	0.116	0.111	0.124	0.073	0.09	0.083	0.074	0.073	0.0948889	1.02976	0.0423108
gnl|gene34548|XL-9_2-gene34548|rna74145|	dnmt1.L	0.056	0.056	0.072	0.074	0.089	0.093	0.099	0.103	0.123	0.135	0.099	0.085	2.01786	1.01282
gnl|gene4753|XL-9_2-gene4753|rna13885|	dnmt1.S	0.047	0.049	0.066	0.074	0.084	0.096	0.101	0.115	0.132	0.143	0.093	0.0848889	2.62766	1.39378
gnl|gene1899|XL-9_2-gene1899|rna5538|	dnpep.L	0.078	0.088	0.078	0.07	0.071	0.073	0.082	0.085	0.08	0.149	0.146	0.0783333	1.05769	0.08092
gnl|gene7587|XL-9_2-gene7587|rna22124|	dnpep.S	0.082	0.086	0.074	0.054	0.056	0.049	0.048	0.055	0.05	0.217	0.229	0.0615556	0.640244	-0.643306
gnl|gene6183|XL-9_2-gene6183|rna18066|	dnttip2.L	0.13	0.106	0.09	0.085	0.095	0.083	0.08	0.078	0.087	0.078	0.088	0.0926667	0.634615	-0.656046
gnl|gene1087|XL-9_2-gene1087|rna3156|	dock1.L	0.093	0.074	0.064	0.065	0.083	0.11	0.092	0.099	0.071	0.108	0.141	0.0834444	0.913978	-0.129768
gnl|gene11581|XL-9_2-gene11581|rna33637|	dock5.L	0.068	0.062	0.083	0.086	0.101	0.106	0.099	0.103	0.108	0.104	0.081	0.0906667	1.55147	0.633636
gnl|gene3379|XL-9_2-gene3379|rna9819|	dock7.L	0.045	0.028	0.064	0.075	0.1	0.114	0.113	0.122	0.145	0.126	0.068	0.0895556	2.96667	1.56884
gnl|gene7281|XL-9_2-gene7281|rna21244|	dohh.L	0.082	0.091	0.083	0.071	0.074	0.081	0.109	0.11	0.105	0.097	0.097	0.0895556	1.31098	0.390641
gnl|gene17285|XL-9_2-gene17285|rna50445|	dok1.L	0.098	0.093	0.101	0.093	0.094	0.102	0.089	0.091	0.086	0.079	0.074	0.0941111	0.903061	-0.147104
gnl|gene10458|XL-9_2-gene10458|rna30383|	donson.L	0.071	0.081	0.082	0.09	0.1	0.108	0.086	0.093	0.102	0.1	0.087	0.0903333	1.37324	0.457583
gnl|gene482|XL-9_2-gene482|rna1382|	dop1b.L	0.094	0.097	0.099	0.081	0.1	0.098	0.097	0.095	0.089	0.067	0.084	0.0944444	0.978723	-0.0310269
gnl|gene9600|XL-9_2-gene9600|rna27927|	dop1b.S	0.091	0.096	0.091	0.091	0.099	0.102	0.1	0.093	0.086	0.077	0.075	0.0943333	0.983516	-0.0239789
gnl|gene3165|XL-9_2-gene3165|rna9169|	dpcd.S	0.086	0.118	0.054	0.067	0.084	0.074	0.079	0.071	0.073	0.145	0.15	0.0784444	0.837209	-0.25634
gnl|gene14387|XL-9_2-gene14387|rna41895|	dpepe.L	0.087	0.085	0.065	0.066	0.07	0.073	0.108	0.109	0.106	0.116	0.115	0.0854444	1.23563	0.305249
gnl|gene44486|XL-9_2-gene44486|rna88428|	dpf2.L	0.09	0.092	0.098	0.093	0.115	0.094	0.084	0.083	0.088	0.077	0.085	0.093	0.95	-0.0740006
gnl|gene50563|XL-9_2-gene50563|rna97130|	dpf2.S	0.072	0.089	0.08	0.088	0.096	0.097	0.083	0.078	0.103	0.11	0.104	0.0873333	1.25694	0.329921
gnl|gene9505|XL-9_2-gene9505|rna27639|	dph1.L	0.096	0.091	0.109	0.101	0.093	0.101	0.092	0.087	0.081	0.073	0.078	0.0945556	0.875	-0.192645
gnl|gene9819|XL-9_2-gene9819|rna28546|	dph2.L	0.088	0.09	0.098	0.092	0.094	0.1	0.087	0.087	0.098	0.083	0.083	0.0926667	1.05114	0.0719498
gnl|gene5844|XL-9_2-gene5844|rna17110|	dph5.S	0.096	0.081	0.101	0.08	0.107	0.075	0.113	0.102	0.091	0.074	0.08	0.094	1.00521	0.00749454
gnl|gene18888|XL-9_2-gene18888|rna55127|	dph6.L	0.086	0.079	0.084	0.083	0.084	0.082	0.102	0.102	0.098	0.097	0.103	0.0888889	1.16279	0.217591
gnl|gene4098|XL-9_2-gene4098|rna11933|	dpm1.S	0.082	0.096	0.081	0.096	0.095	0.095	0.098	0.101	0.094	0.088	0.074	0.0931111	1.18902	0.249778
gnl|gene5553|XL-9_2-gene5553|rna16258|	dpp3.L	0.085	0.087	0.09	0.091	0.085	0.09	0.096	0.097	0.086	0.096	0.099	0.0896667	1.07647	0.106309
gnl|gene45240|XL-9_2-gene45240|rna89516|	dpp3.S	0.095	0.087	0.101	0.09	0.104	0.095	0.093	0.086	0.092	0.077	0.08	0.0936667	0.936842	-0.0941222
gnl|gene9298|XL-9_2-gene9298|rna27011|	dpp4.L	0.09	0.099	0.087	0.09	0.091	0.091	0.091	0.09	0.093	0.089	0.091	0.0913333	1.01667	0.0238467
gnl|gene6615|XL-9_2-gene6615|rna19354|	dpp8.L	0.061	0.071	0.057	0.06	0.075	0.07	0.102	0.099	0.098	0.152	0.155	0.077	1.61475	0.691314
gnl|gene8177|XL-9_2-gene8177|rna23815|	dpp8.S	0.079	0.093	0.083	0.104	0.092	0.103	0.098	0.092	0.087	0.088	0.08	0.0923333	1.13291	0.180035
gnl|gene16963|XL-9_2-gene16963|rna49561|	dpp9.L	0.09	0.091	0.087	0.095	0.098	0.091	0.092	0.093	0.092	0.088	0.084	0.0921111	1.02778	0.0395284
gnl|gene13849|XL-9_2-gene13849|rna40324|	dpy30.L	0.092	0.09	0.09	0.087	0.109	0.109	0.087	0.092	0.092	0.083	0.07	0.0942222	1	0
gnl|gene12015|XL-9_2-gene12015|rna34911|	dpyd.L	0.087	0.089	0.094	0.09	0.099	0.095	0.096	0.092	0.09	0.082	0.087	0.0924444	1.04598	0.0648511
gnl|gene44727|XL-9_2-gene44727|rna88755|	dpysl2.L	0.122	0.085	0.113	0.096	0.095	0.088	0.083	0.083	0.081	0.069	0.086	0.094	0.672131	-0.573185
gnl|gene2923|XL-9_2-gene2923|rna8474|	dpysl3.S	0.16	0.093	0.147	0.103	0.064	0.076	0.067	0.066	0.06	0.06	0.103	0.0928889	0.39375	-1.34465
gnl|gene14417|XL-9_2-gene14417|rna41972|	dpysl5.L	0.085	0.085	0.102	0.106	0.1	0.102	0.088	0.089	0.086	0.076	0.082	0.0936667	1.02941	0.0418202
gnl|gene2924|XL-9_2-gene2924|rna8477|	dqx1.L	0.095	0.079	0.093	0.09	0.093	0.095	0.09	0.094	0.102	0.075	0.093	0.0923333	1.03158	0.0448542
gnl|gene13230|XL-9_2-gene13230|rna38504|	drap1.L	0.061	0.061	0.064	0.08	0.073	0.075	0.099	0.135	0.11	0.135	0.109	0.0842222	2.0082	1.0059
gnl|gene5917|XL-9_2-gene5917|rna17328|	drap1.S	0.061	0.078	0.078	0.075	0.074	0.111	0.098	0.104	0.121	0.102	0.097	0.0888889	1.84426	0.883044
gnl|gene12993|XL-9_2-gene12993|rna37768|	drc3.L	0.084	0.082	0.066	0.066	0.087	0.095	0.108	0.097	0.09	0.126	0.099	0.0861111	1.1131	0.154577
gnl|gene8800|XL-9_2-gene8800|rna25629|	drg1.L	0.092	0.101	0.087	0.093	0.089	0.089	0.093	0.1	0.093	0.082	0.081	0.093	1.04891	0.0688951
gnl|gene19854|XL-9_2-gene19854|rna57981|	drg2.S	0.073	0.08	0.071	0.078	0.075	0.084	0.098	0.108	0.101	0.118	0.115	0.0853333	1.43151	0.517535
gnl|gene2741|XL-9_2-gene2741|rna7976|	dsc3.S	0.093	0.087	0.109	0.109	0.101	0.111	0.075	0.081	0.085	0.072	0.078	0.0945556	0.892473	-0.164119
gnl|gene35461|XL-9_2-gene35461|rna75440|	dscam.L	0.084	0.079	0.076	0.077	0.095	0.098	0.094	0.082	0.101	0.095	0.12	0.0873333	1.08929	0.123382
gnl|gene6569|XL-9_2-gene6569|rna19230|	dscc1.L	0.079	0.082	0.08	0.079	0.086	0.088	0.103	0.103	0.104	0.101	0.095	0.0893333	1.31013	0.389706
gnl|gene17432|XL-9_2-gene17432|rna50916|	dsg2.S	0.076	0.063	0.086	0.083	0.092	0.105	0.088	0.114	0.106	0.102	0.085	0.0903333	1.44737	0.533432
gnl|gene47873|XL-9_2-gene47873|rna93166|	dsp.L	0.101	0.086	0.109	0.096	0.097	0.098	0.086	0.085	0.083	0.075	0.085	0.0934444	0.831683	-0.265894
gnl|gene19613|XL-9_2-gene19613|rna57315|	dsp.S	0.102	0.069	0.117	0.094	0.079	0.082	0.108	0.076	0.103	0.091	0.079	0.0922222	0.877451	-0.18861
gnl|gene2833|XL-9_2-gene2833|rna8227|	dstn.L	0.1	0.097	0.096	0.104	0.098	0.097	0.095	0.097	0.08	0.068	0.068	0.096	0.885	-0.176251
gnl|gene41065|XL-9_2-gene41065|rna83336|	dstyk.S	0.069	0.067	0.079	0.085	0.093	0.116	0.102	0.105	0.11	0.098	0.077	0.0917778	1.55797	0.639668
gnl|gene2716|XL-9_2-gene2716|rna7884|	dtd2.L	0.093	0.092	0.098	0.093	0.093	0.098	0.091	0.09	0.095	0.078	0.078	0.0936667	0.994624	-0.00777735
gnl|gene5946|XL-9_2-gene5946|rna17407|	dtl.L	0.065	0.089	0.07	0.086	0.088	0.105	0.091	0.102	0.091	0.12	0.094	0.0874444	1.48462	0.570089
gnl|gene14018|XL-9_2-gene14018|rna40835|	dtna.L	0.097	0.083	0.093	0.09	0.085	0.097	0.099	0.096	0.098	0.091	0.071	0.0931111	1	0
gnl|gene43334|XL-9_2-gene43334|rna86683|	dtnbp1.L	0.1	0.081	0.093	0.086	0.1	0.081	0.099	0.094	0.098	0.072	0.097	0.0924444	0.96	-0.0588937
gnl|gene38|XL-9_2-gene38|rna116|	dtx2.L	0.084	0.089	0.072	0.085	0.091	0.103	0.107	0.092	0.088	0.096	0.093	0.0901111	1.07143	0.0995357
gnl|gene17034|XL-9_2-gene17034|rna49775|	dtx3l.L	0.086	0.08	0.086	0.086	0.087	0.103	0.111	0.104	0.105	0.08	0.072	0.0942222	1.21512	0.281094
gnl|gene43128|XL-9_2-gene43128|rna86375|	dtx3-like.L	0.082	0.094	0.096	0.111	0.108	0.101	0.083	0.081	0.083	0.085	0.077	0.0932222	1	0
gnl|gene13084|XL-9_2-gene13084|rna38018|	dtymk.S	0.098	0.091	0.088	0.103	0.105	0.094	0.087	0.089	0.09	0.077	0.08	0.0938889	0.913265	-0.130894
gnl|gene18269|XL-9_2-gene18269|rna53362|	dus1l.L	0.051	0.058	0.075	0.082	0.096	0.112	0.103	0.126	0.115	0.106	0.075	0.0908889	2.36275	1.24046
gnl|gene13481|XL-9_2-gene13481|rna39223|	dus2.L	0.082	0.081	0.097	0.104	0.098	0.114	0.072	0.081	0.08	0.094	0.098	0.0898889	0.981707	-0.0266351
gnl|gene6758|XL-9_2-gene6758|rna19770|	dus3l.L	0.087	0.097	0.082	0.095	0.09	0.093	0.094	0.095	0.084	0.095	0.088	0.0907778	1.02874	0.0408723
gnl|gene20038|XL-9_2-gene20038|rna58475|	dusp11.2.S	0.087	0.097	0.071	0.119	0.091	0.096	0.095	0.085	0.074	0.097	0.088	0.0905556	0.913793	-0.130061
gnl|gene2997|XL-9_2-gene2997|rna8682|	dusp12.L	0.057	0.084	0.095	0.065	0.09	0.087	0.103	0.111	0.105	0.098	0.106	0.0885556	1.89474	0.921997
gnl|gene2113|XL-9_2-gene2113|rna6142|	dusp19.L	0.077	0.083	0.075	0.097	0.065	0.072	0.09	0.087	0.102	0.137	0.115	0.0831111	1.22727	0.295456
gnl|gene3374|XL-9_2-gene3374|rna9805|	dut.L	0.081	0.08	0.087	0.083	0.086	0.082	0.102	0.106	0.104	0.095	0.095	0.0901111	1.2963	0.374396
gnl|gene35267|XL-9_2-gene35267|rna75166|	dut.S	0.087	0.091	0.089	0.096	0.093	0.094	0.089	0.105	0.09	0.082	0.084	0.0926667	1.12069	0.164387
gnl|gene38436|XL-9_2-gene38436|rna79577|	dvl2.L	0.09	0.093	0.101	0.088	0.093	0.091	0.099	0.092	0.093	0.078	0.082	0.0933333	1.02778	0.0395284
gnl|gene44916|XL-9_2-gene44916|rna89039|	dym.L	0.098	0.108	0.11	0.09	0.1	0.108	0.076	0.085	0.087	0.064	0.074	0.0957778	0.877551	-0.188445
gnl|gene8546|XL-9_2-gene8546|rna24864|	dync1h1.L	0.086	0.084	0.085	0.087	0.09	0.088	0.094	0.095	0.09	0.101	0.101	0.0887778	1.07558	0.105117
gnl|gene41145|XL-9_2-gene41145|rna83465|	dync1i2.L	0.091	0.104	0.104	0.073	0.081	0.106	0.091	0.089	0.092	0.083	0.088	0.0923333	0.994505	-0.00794875
gnl|gene9164|XL-9_2-gene9164|rna26638|	dync1li1.L	0.087	0.089	0.091	0.095	0.096	0.094	0.095	0.094	0.089	0.083	0.087	0.0922222	1.05172	0.0727563
gnl|gene14424|XL-9_2-gene14424|rna41986|	dync1li1.S	0.033	0.058	0.03	0.04	0.028	0.027	0.113	0.143	0.085	0.264	0.18	0.0618889	3.45455	1.7885
gnl|gene2773|XL-9_2-gene2773|rna8074|	dync1li2.L	0.097	0.089	0.099	0.104	0.094	0.099	0.091	0.094	0.086	0.072	0.076	0.0947778	0.927835	-0.10806
gnl|gene7939|XL-9_2-gene7939|rna23156|	dync2h1.L	0.067	0.057	0.073	0.074	0.092	0.098	0.104	0.105	0.128	0.12	0.082	0.0886667	1.73881	0.798097
gnl|gene13938|XL-9_2-gene13938|rna40577|	dync2i1.L	0.08	0.069	0.084	0.081	0.091	0.099	0.094	0.108	0.105	0.104	0.086	0.0901111	1.33125	0.412782
gnl|gene3309|XL-9_2-gene3309|rna9597|	dync2i1.S	0.095	0.083	0.099	0.095	0.102	0.096	0.091	0.079	0.097	0.081	0.082	0.093	0.926316	-0.110424
gnl|gene15415|XL-9_2-gene15415|rna44990|	dync2i2.L	0.089	0.081	0.1	0.099	0.106	0.098	0.09	0.087	0.095	0.081	0.074	0.0938889	1.02247	0.0320612
gnl|gene4344|XL-9_2-gene4344|rna12660|	dync2li1.S	0.086	0.074	0.084	0.086	0.089	0.091	0.082	0.081	0.091	0.116	0.121	0.0848889	1	0
gnl|gene7511|XL-9_2-gene7511|rna21899|	dynll1.S	0.099	0.101	0.094	0.096	0.092	0.105	0.089	0.093	0.089	0.067	0.077	0.0953333	0.919192	-0.121562
gnl|gene36168|XL-9_2-gene36168|rna76395|	dynll2.L	0.086	0.111	0.077	0.102	0.09	0.08	0.086	0.085	0.104	0.09	0.088	0.0912222	1.09884	0.135978
gnl|gene15676|XL-9_2-gene15676|rna45764|	dynlt1.L	0.086	0.1	0.114	0.09	0.09	0.07	0.083	0.085	0.093	0.092	0.096	0.0901111	1.03488	0.0494687
gnl|gene9725|XL-9_2-gene9725|rna28285|	e2f6.S	0.083	0.108	0.108	0.108	0.097	0.111	0.092	0.081	0.08	0.076	0.056	0.0964444	0.96988	-0.0441226
gnl|gene3285|XL-9_2-gene3285|rna9515|	e2f8.L	0.05	0.061	0.09	0.087	0.106	0.101	0.108	0.087	0.084	0.139	0.088	0.086	1.71	0.773996
gnl|gene6295|XL-9_2-gene6295|rna18399|	eaf2.L	0.087	0.098	0.098	0.098	0.095	0.095	0.089	0.095	0.085	0.08	0.079	0.0933333	1.03448	0.0489096
gnl|gene41755|XL-9_2-gene41755|rna84308|	ears2.S	0.099	0.094	0.088	0.107	0.097	0.104	0.078	0.083	0.091	0.082	0.078	0.0934444	0.878788	-0.186413
gnl|gene37539|XL-9_2-gene37539|rna78290|	ebna1bp2.L	0.126	0.092	0.116	0.1	0.117	0.075	0.081	0.065	0.068	0.052	0.107	0.0933333	0.527778	-0.921997
gnl|gene14731|XL-9_2-gene14731|rna42939|	ecd.S	0.072	0.079	0.067	0.068	0.075	0.071	0.089	0.095	0.081	0.151	0.152	0.0774444	1.22222	0.289507
gnl|gene17301|XL-9_2-gene17301|rna50494|	ece1.L	0.076	0.073	0.074	0.075	0.084	0.081	0.106	0.103	0.107	0.105	0.116	0.0865556	1.38158	0.466318
gnl|gene16050|XL-9_2-gene16050|rna46921|	ece1.S	0.074	0.077	0.079	0.089	0.088	0.087	0.097	0.101	0.103	0.103	0.101	0.0883333	1.37838	0.462972
gnl|gene47687|XL-9_2-gene47687|rna92921|	ech1.L	0.083	0.092	0.092	0.101	0.085	0.085	0.089	0.088	0.101	0.093	0.09	0.0906667	1.13855	0.187203
gnl|gene11123|XL-9_2-gene11123|rna32328|	echdc2.L	0.091	0.09	0.09	0.095	0.083	0.08	0.111	0.103	0.098	0.078	0.082	0.0934444	1.1044	0.143257
gnl|gene18496|XL-9_2-gene18496|rna53999|	echdc3.L	0.096	0.116	0.103	0.108	0.108	0.105	0.072	0.08	0.073	0.073	0.066	0.0956667	0.796875	-0.327575
gnl|gene15555|XL-9_2-gene15555|rna45427|	echs1.L	0.076	0.075	0.078	0.084	0.086	0.082	0.097	0.1	0.088	0.127	0.108	0.0851111	1.23684	0.306661
gnl|gene11008|XL-9_2-gene11008|rna32002|	eci1.L	0.087	0.096	0.087	0.087	0.085	0.088	0.092	0.091	0.089	0.094	0.103	0.0891111	1.03448	0.0489096
gnl|gene8702|XL-9_2-gene8702|rna25331|	eci2.L	0.087	0.091	0.09	0.081	0.091	0.089	0.103	0.102	0.097	0.084	0.085	0.0923333	1.14368	0.193681
gnl|gene37298|XL-9_2-gene37298|rna77979|	eci3.L	0.086	0.093	0.078	0.1	0.098	0.113	0.096	0.094	0.087	0.081	0.074	0.0938889	1.05233	0.0735811
gnl|gene18217|XL-9_2-gene18217|rna53219|	ecm1.L	0.07	0.075	0.075	0.08	0.084	0.088	0.106	0.103	0.105	0.113	0.102	0.0873333	1.48571	0.571157
gnl|gene12849|XL-9_2-gene12849|rna37352|	ecpas.L	0.088	0.085	0.085	0.087	0.088	0.089	0.094	0.094	0.09	0.101	0.099	0.0888889	1.04545	0.0641303
gnl|gene15685|XL-9_2-gene15685|rna45799|	ecsit.S	0.084	0.09	0.085	0.095	0.095	0.102	0.089	0.107	0.093	0.081	0.078	0.0933333	1.19048	0.251539
gnl|gene8271|XL-9_2-gene8271|rna24082|	ect2.L	0.072	0.076	0.089	0.093	0.103	0.116	0.108	0.094	0.1	0.082	0.068	0.0945556	1.34722	0.429988
gnl|gene6536|XL-9_2-gene6536|rna19120|	ect2.S	0.1	0.09	0.103	0.094	0.107	0.104	0.087	0.08	0.082	0.073	0.078	0.0941111	0.81	-0.304006
gnl|gene13637|XL-9_2-gene13637|rna39687|	edc3.L	0.085	0.091	0.093	0.105	0.093	0.102	0.091	0.096	0.097	0.073	0.073	0.0947778	1.13529	0.183066
gnl|gene185|XL-9_2-gene185|rna517|	edc3.S	0.094	0.071	0.104	0.115	0.086	0.111	0.095	0.071	0.092	0.089	0.073	0.0932222	0.867021	-0.205861
gnl|gene2383|XL-9_2-gene2383|rna6928|	edc4.L	0.087	0.084	0.092	0.087	0.096	0.091	0.097	0.093	0.101	0.085	0.087	0.092	1.11494	0.156969
gnl|gene40884|XL-9_2-gene40884|rna83085|	edc4.S	0.1	0.101	0.094	0.084	0.097	0.089	0.088	0.093	0.089	0.084	0.082	0.0927778	0.91	-0.136062
gnl|gene3550|XL-9_2-gene3550|rna10332|	edem3.L	0.084	0.086	0.091	0.098	0.095	0.104	0.096	0.097	0.096	0.082	0.07	0.0941111	1.14881	0.20014
gnl|gene3239|XL-9_2-gene3239|rna9383|	edf1.L	0.098	0.091	0.115	0.106	0.101	0.096	0.089	0.085	0.083	0.069	0.068	0.096	0.857143	-0.222392
gnl|gene116|XL-9_2-gene116|rna323|	edrf1.S	0.078	0.079	0.048	0.048	0.048	0.056	0.089	0.096	0.079	0.172	0.208	0.069	1.12179	0.165809
gnl|gene8201|XL-9_2-gene8201|rna23879|	eea1.L	0.095	0.094	0.093	0.097	0.095	0.095	0.09	0.089	0.087	0.082	0.083	0.0927778	0.926316	-0.110424
gnl|gene8583|XL-9_2-gene8583|rna24971|	eea1.S	0.099	0.092	0.1	0.093	0.095	0.092	0.087	0.09	0.089	0.08	0.084	0.093	0.90404	-0.145541
gnl|gene9009|XL-9_2-gene9009|rna26236|	eed.L	0.079	0.076	0.085	0.089	0.087	0.11	0.106	0.1	0.097	0.091	0.081	0.0921111	1.24684	0.318271
gnl|gene11840|XL-9_2-gene11840|rna34396|	eef1a1.L	0.102	0.096	0.106	0.11	0.095	0.094	0.086	0.081	0.095	0.066	0.069	0.0961111	0.862745	-0.212994
gnl|gene15250|XL-9_2-gene15250|rna44506|	eef1a1o.L	0.076	0.082	0.073	0.089	0.082	0.082	0.095	0.097	0.098	0.113	0.112	0.086	1.28289	0.359403
gnl|gene14867|XL-9_2-gene14867|rna43389|	eef1a1o.S	0.068	0.072	0.068	0.065	0.077	0.071	0.095	0.098	0.087	0.155	0.144	0.0778889	1.36029	0.443919
gnl|gene9272|XL-9_2-gene9272|rna26922|	eef1akmt1.S	0.103	0.091	0.098	0.103	0.095	0.099	0.087	0.088	0.088	0.072	0.076	0.0946667	0.854369	-0.227069
gnl|gene6716|XL-9_2-gene6716|rna19666|	eef1akmt2.S	0.088	0.105	0.075	0.086	0.09	0.096	0.082	0.088	0.076	0.107	0.108	0.0873333	0.931818	-0.10188
gnl|gene17965|XL-9_2-gene17965|rna52515|	eef1aknmt.S	0.087	0.079	0.079	0.078	0.089	0.08	0.095	0.102	0.102	0.105	0.105	0.0878889	1.17241	0.229482
gnl|gene184|XL-9_2-gene184|rna515|	eef1b2.L	0.075	0.09	0.077	0.086	0.08	0.082	0.1	0.107	0.108	0.102	0.095	0.0894444	1.43333	0.519374
gnl|gene5829|XL-9_2-gene5829|rna17062|	eef1d.L	0.094	0.128	0.112	0.135	0.09	0.098	0.083	0.077	0.078	0.051	0.055	0.0994444	0.824468	-0.278464
gnl|gene43198|XL-9_2-gene43198|rna86492|	eef1d.S	0.081	0.094	0.074	0.087	0.085	0.086	0.097	0.099	0.102	0.101	0.095	0.0894444	1.24074	0.311202
gnl|gene2435|XL-9_2-gene2435|rna7088|	eef1e1.L	0.08	0.078	0.08	0.08	0.075	0.075	0.093	0.091	0.083	0.132	0.134	0.0816667	1.0875	0.121015
gnl|gene8633|XL-9_2-gene8633|rna25136|	eef1g.L	0.091	0.101	0.094	0.104	0.094	0.097	0.088	0.084	0.093	0.076	0.078	0.094	0.972527	-0.0401891
gnl|gene6274|XL-9_2-gene6274|rna18344|	eef1g.S	0.084	0.089	0.093	0.094	0.086	0.088	0.096	0.099	0.096	0.089	0.084	0.0916667	1.16071	0.215013
gnl|gene2783|XL-9_2-gene2783|rna8097|	eef2.1.L	0.087	0.088	0.091	0.081	0.09	0.089	0.097	0.091	0.092	0.094	0.099	0.0895556	1.05172	0.0727563
gnl|gene7584|XL-9_2-gene7584|rna22116|	eef2.1.S	0.086	0.094	0.093	0.094	0.094	0.09	0.088	0.087	0.094	0.09	0.09	0.0911111	1.05233	0.0735811
gnl|gene9517|XL-9_2-gene9517|rna27679|	eef2.2.L	0.092	0.094	0.082	0.091	0.089	0.087	0.088	0.087	0.09	0.098	0.103	0.0888889	0.961957	-0.0559564
gnl|gene12406|XL-9_2-gene12406|rna36073|	eef2kmt.L	0.104	0.115	0.098	0.116	0.122	0.115	0.059	0.067	0.068	0.075	0.062	0.096	0.649038	-0.623624
gnl|gene1772|XL-9_2-gene1772|rna5142|	eefsec.S	0.092	0.088	0.089	0.089	0.098	0.093	0.099	0.092	0.09	0.085	0.084	0.0922222	0.98913	-0.0157673
gnl|gene45370|XL-9_2-gene45370|rna89715|	efcab7.L	0.077	0.078	0.085	0.086	0.083	0.1	0.098	0.107	0.098	0.101	0.087	0.0902222	1.33117	0.412694
gnl|gene16020|XL-9_2-gene16020|rna46829|	efhd1.L	0.083	0.081	0.086	0.086	0.08	0.079	0.109	0.11	0.102	0.093	0.091	0.0906667	1.27711	0.352881
gnl|gene15041|XL-9_2-gene15041|rna43886|	efl1.L	0.099	0.09	0.099	0.093	0.096	0.087	0.092	0.09	0.092	0.082	0.081	0.0931111	0.919192	-0.121562
gnl|gene43718|XL-9_2-gene43718|rna87240|	efna1.S	0.074	0.083	0.09	0.112	0.104	0.125	0.101	0.093	0.087	0.069	0.062	0.0965556	1.21622	0.2824
gnl|gene2104|XL-9_2-gene2104|rna6112|	eftud2.S	0.09	0.087	0.088	0.09	0.09	0.088	0.087	0.094	0.087	0.104	0.097	0.089	1.00556	0.00799279
gnl|gene3403|XL-9_2-gene3403|rna9902|	egln1.S	0.097	0.1	0.091	0.102	0.103	0.115	0.076	0.085	0.08	0.075	0.077	0.0943333	0.850515	-0.233591
gnl|gene407|XL-9_2-gene407|rna1183|	ehbp1.L	0.081	0.074	0.11	0.091	0.102	0.102	0.091	0.095	0.087	0.079	0.088	0.0925556	1.12346	0.167945
gnl|gene9122|XL-9_2-gene9122|rna26528|	ehd1.L	0.087	0.097	0.085	0.092	0.091	0.099	0.091	0.095	0.087	0.093	0.084	0.0915556	1.04598	0.0648511
gnl|gene16364|XL-9_2-gene16364|rna47793|	ehd3.L	0.087	0.088	0.087	0.079	0.086	0.089	0.088	0.097	0.094	0.097	0.107	0.0883333	1.0977	0.134485
gnl|gene13864|XL-9_2-gene13864|rna40364|	ehd4.L	0.137	0.08	0.112	0.1	0.084	0.077	0.078	0.082	0.085	0.068	0.098	0.0927778	0.609489	-0.714328
gnl|gene10643|XL-9_2-gene10643|rna30930|	ehhadh.S	0.093	0.087	0.088	0.091	0.096	0.087	0.092	0.09	0.09	0.093	0.093	0.0904444	0.967742	-0.0473057
gnl|gene41639|XL-9_2-gene41639|rna84138|	ehmt1.L	0.082	0.084	0.097	0.089	0.103	0.104	0.084	0.097	0.094	0.082	0.083	0.0926667	1.16463	0.219877
gnl|gene13914|XL-9_2-gene13914|rna40511|	ehmt2.L	0.077	0.082	0.069	0.07	0.091	0.089	0.097	0.104	0.113	0.103	0.105	0.088	1.40909	0.494765
gnl|gene10764|XL-9_2-gene10764|rna31283|	ei24.S	0.089	0.079	0.069	0.063	0.072	0.08	0.096	0.141	0.088	0.134	0.09	0.0863333	1.28652	0.36347
gnl|gene11748|XL-9_2-gene11748|rna34124|	eif1ad.L	0.071	0.065	0.057	0.03	0.045	0.034	0.141	0.143	0.129	0.135	0.15	0.0794444	1.91549	0.937716
gnl|gene43469|XL-9_2-gene43469|rna86891|	eif1ax.S	0.093	0.086	0.098	0.094	0.093	0.09	0.093	0.093	0.095	0.083	0.082	0.0927778	1.01075	0.01543
gnl|gene42419|XL-9_2-gene42419|rna85311|	eif1b.L	0.087	0.076	0.104	0.089	0.096	0.083	0.097	0.098	0.101	0.081	0.09	0.0923333	1.14368	0.193681
gnl|gene16806|XL-9_2-gene16806|rna49109|	eif2a.L	0.097	0.1	0.09	0.092	0.092	0.091	0.089	0.094	0.084	0.087	0.084	0.0921111	0.917526	-0.124179
gnl|gene9480|XL-9_2-gene9480|rna27568|	eif2a.S	0.09	0.09	0.084	0.088	0.093	0.09	0.094	0.096	0.094	0.087	0.093	0.091	1.05556	0.0780025
gnl|gene42998|XL-9_2-gene42998|rna86177|	eif2ak1.L	0.092	0.097	0.111	0.1	0.108	0.104	0.087	0.08	0.095	0.049	0.078	0.0971111	0.951087	-0.0723508
gnl|gene15352|XL-9_2-gene15352|rna44807|	eif2ak2.L	0.096	0.099	0.11	0.098	0.105	0.103	0.084	0.081	0.08	0.071	0.074	0.0951111	0.838542	-0.254046
gnl|gene16798|XL-9_2-gene16798|rna49084|	eif2ak4.L	0.093	0.094	0.093	0.094	0.096	0.096	0.087	0.096	0.088	0.08	0.081	0.093	0.989247	-0.0155969
gnl|gene10075|XL-9_2-gene10075|rna29280|	eif2b1.L	0.09	0.09	0.086	0.087	0.096	0.088	0.098	0.096	0.094	0.086	0.088	0.0916667	1.05556	0.0780025
gnl|gene9190|XL-9_2-gene9190|rna26699|	eif2b2.L	0.088	0.082	0.086	0.081	0.093	0.081	0.083	0.085	0.098	0.11	0.114	0.0863333	1.03977	0.0562682
gnl|gene11175|XL-9_2-gene11175|rna32480|	eif2b3.L	0.088	0.086	0.092	0.093	0.092	0.093	0.092	0.091	0.091	0.089	0.091	0.0908889	1.03409	0.048363
gnl|gene39301|XL-9_2-gene39301|rna80832|	eif2b4.L	0.097	0.093	0.096	0.088	0.098	0.085	0.094	0.086	0.085	0.085	0.093	0.0913333	0.881443	-0.18206
gnl|gene40496|XL-9_2-gene40496|rna82516|	eif2b5.S	0.078	0.085	0.073	0.079	0.084	0.089	0.099	0.106	0.098	0.11	0.098	0.0878889	1.30769	0.387023
gnl|gene1270|XL-9_2-gene1270|rna3695|	eif2d.S	0.096	0.094	0.094	0.093	0.097	0.093	0.091	0.087	0.085	0.082	0.087	0.0922222	0.895833	-0.158698
gnl|gene12131|XL-9_2-gene12131|rna35251|	eif2s1.L	0.085	0.088	0.086	0.096	0.088	0.092	0.093	0.1	0.09	0.095	0.087	0.0908889	1.11765	0.160465
gnl|gene6509|XL-9_2-gene6509|rna19037|	eif2s2.L	0.088	0.082	0.092	0.079	0.09	0.084	0.101	0.093	0.103	0.092	0.096	0.0902222	1.11364	0.155278
gnl|gene18347|XL-9_2-gene18347|rna53589|	eif2s2.S	0.094	0.087	0.097	0.098	0.096	0.099	0.091	0.096	0.09	0.073	0.08	0.0942222	0.989362	-0.01543
gnl|gene2744|XL-9_2-gene2744|rna7989|	eif2s3.L	0.093	0.086	0.102	0.089	0.104	0.093	0.097	0.084	0.088	0.081	0.086	0.0928889	0.924731	-0.112894
gnl|gene7163|XL-9_2-gene7163|rna20905|	eif2s3.S	0.107	0.1	0.088	0.099	0.092	0.113	0.078	0.096	0.099	0.065	0.062	0.0968889	0.911215	-0.134137
gnl|gene1120|XL-9_2-gene1120|rna3249|	eif3a.L	0.086	0.098	0.085	0.095	0.09	0.09	0.091	0.096	0.09	0.091	0.088	0.0912222	1.0814	0.112894
gnl|gene40629|XL-9_2-gene40629|rna82723|	eif3a.S	0.096	0.094	0.093	0.095	0.095	0.092	0.091	0.086	0.09	0.083	0.084	0.0924444	0.916667	-0.125531
gnl|gene17008|XL-9_2-gene17008|rna49701|	eif3b.L	0.091	0.095	0.091	0.09	0.092	0.092	0.093	0.097	0.091	0.081	0.084	0.0924444	1.03297	0.0467942
gnl|gene14685|XL-9_2-gene14685|rna42798|	eif3b.S	0.097	0.085	0.097	0.09	0.099	0.091	0.094	0.09	0.097	0.076	0.084	0.0933333	0.963918	-0.0530184
gnl|gene7901|XL-9_2-gene7901|rna23051|	eif3c.L	0.089	0.092	0.098	0.095	0.091	0.092	0.082	0.085	0.079	0.101	0.098	0.0892222	0.921348	-0.118181
gnl|gene5643|XL-9_2-gene5643|rna16528|	eif3c.S	0.103	0.097	0.112	0.105	0.106	0.116	0.084	0.087	0.072	0.074	0.045	0.098	0.771845	-0.373618
gnl|gene12445|XL-9_2-gene12445|rna36178|	eif3d.S	0.083	0.08	0.083	0.083	0.09	0.081	0.101	0.098	0.1	0.097	0.103	0.0887778	1.19277	0.254317
gnl|gene9739|XL-9_2-gene9739|rna28329|	eif3e.S	0.092	0.08	0.091	0.088	0.101	0.091	0.09	0.091	0.101	0.078	0.097	0.0916667	1.04348	0.0614005
gnl|gene14362|XL-9_2-gene14362|rna41829|	eif3f.S	0.083	0.092	0.087	0.089	0.088	0.097	0.089	0.088	0.081	0.101	0.105	0.0882222	1.01807	0.02584
gnl|gene7071|XL-9_2-gene7071|rna20643|	eif3g.L	0.099	0.077	0.104	0.082	0.102	0.089	0.098	0.08	0.108	0.075	0.089	0.0932222	0.949495	-0.0747678
gnl|gene10132|XL-9_2-gene10132|rna29465|	eif3g.S	0.092	0.128	0.077	0.114	0.083	0.111	0.071	0.114	0.063	0.085	0.061	0.0947778	0.961957	-0.0559564
gnl|gene12006|XL-9_2-gene12006|rna34886|	eif3h.L	0.092	0.088	0.088	0.095	0.098	0.097	0.089	0.097	0.092	0.08	0.085	0.0928889	1.02717	0.0386805
gnl|gene16972|XL-9_2-gene16972|rna49582|	eif3h.S	0.097	0.095	0.102	0.091	0.093	0.094	0.091	0.086	0.093	0.077	0.08	0.0935556	0.92268	-0.116097
gnl|gene11788|XL-9_2-gene11788|rna34230|	eif3i.L	0.071	0.086	0.065	0.063	0.071	0.061	0.094	0.097	0.089	0.15	0.153	0.0774444	1.30986	0.389412
gnl|gene11729|XL-9_2-gene11729|rna34077|	eif3i.S	0.073	0.074	0.072	0.067	0.072	0.067	0.088	0.086	0.081	0.163	0.156	0.0755556	1.14384	0.19388
gnl|gene9712|XL-9_2-gene9712|rna28253|	eif3j.S	0.099	0.101	0.117	0.112	0.101	0.097	0.084	0.069	0.083	0.069	0.067	0.0958889	0.767677	-0.381429
gnl|gene16659|XL-9_2-gene16659|rna48671|	eif3k.S	0.091	0.079	0.099	0.093	0.089	0.089	0.096	0.097	0.094	0.085	0.088	0.0918889	1.04945	0.0696342
gnl|gene7212|XL-9_2-gene7212|rna21040|	eif3l.L	0.092	0.088	0.085	0.087	0.1	0.092	0.093	0.092	0.097	0.079	0.093	0.0917778	1.02717	0.0386805
gnl|gene11320|XL-9_2-gene11320|rna32920|	eif3l.S	0.094	0.087	0.101	0.09	0.092	0.091	0.096	0.091	0.089	0.083	0.087	0.0923333	0.957447	-0.0627358
gnl|gene45607|XL-9_2-gene45607|rna90070|	eif3m.L	0.088	0.091	0.083	0.086	0.096	0.089	0.1	0.096	0.098	0.088	0.086	0.0918889	1.10227	0.140481
gnl|gene3207|XL-9_2-gene3207|rna9278|	eif3m.S	0.035	0.039	0.041	0.026	0.036	0.039	0.125	0.13	0.132	0.188	0.209	0.067	3.74286	1.90414
gnl|gene17828|XL-9_2-gene17828|rna52102|	eif4a1.L	0.069	0.076	0.071	0.073	0.071	0.07	0.096	0.099	0.086	0.146	0.143	0.079	1.34058	0.422857
gnl|gene19373|XL-9_2-gene19373|rna56618|	eif4a1.S	0.097	0.092	0.092	0.094	0.092	0.094	0.091	0.093	0.085	0.085	0.084	0.0922222	0.917526	-0.124179
gnl|gene15823|XL-9_2-gene15823|rna46234|	eif4a3.1.L	0.098	0.094	0.081	0.092	0.095	0.099	0.089	0.086	0.083	0.09	0.094	0.0907778	0.862245	-0.21383
gnl|gene49265|XL-9_2-gene49265|rna95171|	eif4a3.S	0.093	0.082	0.093	0.09	0.088	0.087	0.098	0.093	0.093	0.09	0.092	0.0907778	1	0
gnl|gene8804|XL-9_2-gene8804|rna25637|	eif4b.L	0.117	0.098	0.129	0.104	0.108	0.104	0.069	0.059	0.075	0.074	0.065	0.0958889	0.57265	-0.804276
gnl|gene38978|XL-9_2-gene38978|rna80409|	eif4b.S	0.077	0.082	0.094	0.101	0.106	0.117	0.075	0.079	0.107	0.102	0.06	0.0931111	1.20779	0.272372
gnl|gene13528|XL-9_2-gene13528|rna39367|	eif4e.L	0.073	0.086	0.07	0.079	0.085	0.077	0.094	0.1	0.1	0.119	0.117	0.0848889	1.36986	0.454032
gnl|gene34877|XL-9_2-gene34877|rna74581|	eif4e1b.S	0.105	0.095	0.094	0.083	0.095	0.079	0.099	0.083	0.094	0.082	0.091	0.0918889	0.842857	-0.24664
gnl|gene7999|XL-9_2-gene7999|rna23323|	eif4e2.L	0.088	0.093	0.091	0.102	0.093	0.104	0.091	0.094	0.084	0.082	0.078	0.0933333	1.01136	0.0163018
gnl|gene34951|XL-9_2-gene34951|rna74692|	eif4e3.S	0.089	0.095	0.093	0.101	0.097	0.1	0.091	0.096	0.083	0.078	0.077	0.0938889	1.00562	0.00808235
gnl|gene40060|XL-9_2-gene40060|rna81895|	eif4ebp2.L	0.177	0.188	0.082	0.068	0.066	0.05	0.064	0.069	0.061	0.068	0.106	0.0916667	0.367232	-1.44524
gnl|gene6548|XL-9_2-gene6548|rna19173|	eif4enif1.L	0.109	0.106	0.065	0.063	0.065	0.068	0.098	0.108	0.095	0.108	0.114	0.0863333	0.931193	-0.102848
gnl|gene10718|XL-9_2-gene10718|rna31151|	eif4enif1.S	0.13	0.114	0.082	0.075	0.088	0.076	0.086	0.093	0.081	0.092	0.084	0.0916667	0.669231	-0.579424
gnl|gene8214|XL-9_2-gene8214|rna23924|	eif4g1.L	0.098	0.091	0.096	0.093	0.089	0.084	0.1	0.093	0.084	0.081	0.092	0.092	0.903061	-0.147104
gnl|gene19578|XL-9_2-gene19578|rna57206|	eif4g1.S	0.085	0.08	0.087	0.083	0.084	0.083	0.082	0.086	0.079	0.126	0.125	0.0832222	0.970588	-0.0430687
gnl|gene49724|XL-9_2-gene49724|rna95825|	eif4g2.S	0.08	0.088	0.09	0.114	0.093	0.117	0.083	0.117	0.08	0.077	0.063	0.0957778	1.23125	0.300124
gnl|gene15925|XL-9_2-gene15925|rna46549|	eif4h.S	0.052	0.061	0.059	0.057	0.055	0.058	0.111	0.125	0.094	0.164	0.164	0.0746667	2.10577	1.07435
gnl|gene2410|XL-9_2-gene2410|rna7018|	eif5.L	0.095	0.089	0.089	0.087	0.086	0.086	0.098	0.096	0.097	0.087	0.09	0.0914444	1.01579	0.0226014
gnl|gene7833|XL-9_2-gene7833|rna22855|	eif5.S	0.043	0.056	0.059	0.048	0.043	0.052	0.108	0.114	0.088	0.217	0.171	0.0678889	2.34884	1.23195
gnl|gene15803|XL-9_2-gene15803|rna46173|	eif5a.L	0.027	0.027	0.018	0.02	0.027	0.022	0.08	0.076	0.06	0.32	0.325	0.0396667	2.51852	1.33258
gnl|gene15621|XL-9_2-gene15621|rna45609|	eif5a.S	0.095	0.097	0.096	0.09	0.087	0.086	0.084	0.082	0.084	0.099	0.099	0.089	0.873684	-0.194816
gnl|gene43210|XL-9_2-gene43210|rna86507|	eif5b.L	0.097	0.087	0.107	0.092	0.102	0.1	0.093	0.083	0.09	0.073	0.077	0.0945556	0.891753	-0.165285
gnl|gene9520|XL-9_2-gene9520|rna27700|	eif5b-like.S	0.092	0.092	0.093	0.093	0.094	0.094	0.087	0.087	0.081	0.096	0.092	0.0903333	0.913043	-0.131245
gnl|gene19914|XL-9_2-gene19914|rna58153|	eif6.L	0.189	0.164	0.173	0.075	0.07	0.066	0.052	0.058	0.058	0.05	0.046	0.100556	0.306878	-1.70426
gnl|gene8221|XL-9_2-gene8221|rna23945|	eif6.S	0.108	0.179	0.08	0.089	0.118	0.106	0.047	0.052	0.061	0.088	0.072	0.0933333	0.523148	-0.934709
gnl|gene16372|XL-9_2-gene16372|rna47813|	eipr1.S	0.084	0.089	0.077	0.079	0.099	0.102	0.092	0.101	0.088	0.091	0.098	0.0901111	1.125	0.169925
gnl|gene221|XL-9_2-gene221|rna619|	elac1.L	0.087	0.067	0.071	0.077	0.087	0.056	0.109	0.084	0.121	0.112	0.129	0.0843333	1.17816	0.236537
gnl|gene10263|XL-9_2-gene10263|rna29840|	elavl1.L	0.096	0.083	0.084	0.091	0.097	0.083	0.099	0.1	0.098	0.087	0.083	0.0923333	1.03125	0.0443941
gnl|gene17598|XL-9_2-gene17598|rna51414|	elavl1.S	0.061	0.053	0.057	0.049	0.068	0.055	0.104	0.107	0.099	0.168	0.18	0.0725556	1.68852	0.755763
gnl|gene2726|XL-9_2-gene2726|rna7919|	elavl2.S	0.084	0.094	0.081	0.08	0.077	0.094	0.094	0.102	0.103	0.094	0.098	0.0898889	1.22024	0.287163
gnl|gene19237|XL-9_2-gene19237|rna56205|	ell.L	0.08	0.071	0.103	0.081	0.117	0.105	0.093	0.097	0.09	0.077	0.088	0.093	1.16875	0.224966
gnl|gene11262|XL-9_2-gene11262|rna32759|	ell.S	0.086	0.092	0.1	0.1	0.113	0.116	0.077	0.077	0.079	0.089	0.072	0.0933333	0.906977	-0.140863
gnl|gene5113|XL-9_2-gene5113|rna14950|	ell2.L	0.092	0.099	0.093	0.1	0.1	0.1	0.09	0.092	0.08	0.077	0.078	0.094	0.934783	-0.0972972
gnl|gene13944|XL-9_2-gene13944|rna40592|	ell2.S	0.099	0.096	0.098	0.095	0.091	0.09	0.092	0.084	0.094	0.079	0.083	0.0932222	0.89899	-0.153623
gnl|gene16267|XL-9_2-gene16267|rna47517|	elmo1.L	0.088	0.09	0.1	0.096	0.104	0.111	0.088	0.089	0.087	0.079	0.069	0.0947778	1	0
gnl|gene8940|XL-9_2-gene8940|rna26035|	elmod2.L	0.101	0.103	0.107	0.103	0.094	0.102	0.085	0.082	0.075	0.072	0.076	0.0946667	0.777228	-0.363591
gnl|gene37653|XL-9_2-gene37653|rna78434|	elob.L	0.091	0.099	0.098	0.118	0.093	0.109	0.082	0.108	0.07	0.078	0.055	0.0964444	0.978022	-0.0320612
gnl|gene15914|XL-9_2-gene15914|rna46521|	elof1.L	0.063	0.048	0.07	0.048	0.047	0.055	0.128	0.125	0.146	0.128	0.141	0.0811111	2.15079	1.10487
gnl|gene17259|XL-9_2-gene17259|rna50375|	elovl1.L	0.09	0.075	0.143	0.077	0.089	0.099	0.099	0.068	0.076	0.093	0.09	0.0906667	0.8	-0.321928
gnl|gene10535|XL-9_2-gene10535|rna30605|	elovl1.S	0.127	0.105	0.136	0.09	0.102	0.085	0.073	0.073	0.073	0.063	0.073	0.096	0.574803	-0.79886
gnl|gene14293|XL-9_2-gene14293|rna41640|	elovl5.L	0.085	0.107	0.083	0.102	0.11	0.09	0.089	0.079	0.086	0.083	0.086	0.0923333	0.970588	-0.0430687
gnl|gene19254|XL-9_2-gene19254|rna56249|	elp1.S	0.097	0.095	0.092	0.099	0.098	0.1	0.087	0.085	0.087	0.08	0.081	0.0933333	0.886598	-0.173648
gnl|gene15253|XL-9_2-gene15253|rna44515|	elp2.S	0.093	0.101	0.082	0.099	0.093	0.106	0.088	0.092	0.085	0.084	0.077	0.0932222	0.951613	-0.0715533
gnl|gene14339|XL-9_2-gene14339|rna41765|	elp3.L	0.095	0.092	0.091	0.093	0.1	0.101	0.087	0.087	0.087	0.085	0.082	0.0925556	0.915789	-0.126912
gnl|gene34863|XL-9_2-gene34863|rna74556|	elp4.S	0.097	0.094	0.105	0.107	0.101	0.107	0.085	0.088	0.078	0.069	0.069	0.0957778	0.85567	-0.224873
gnl|gene16255|XL-9_2-gene16255|rna47474|	elp6.L	0.086	0.081	0.096	0.087	0.106	0.092	0.093	0.084	0.096	0.087	0.093	0.0912222	1.04651	0.0655883
gnl|gene3504|XL-9_2-gene3504|rna10197|	emc1.S	0.093	0.089	0.09	0.098	0.099	0.094	0.094	0.091	0.093	0.079	0.079	0.0934444	0.989247	-0.0155969
gnl|gene7147|XL-9_2-gene7147|rna20860|	emc10.S	0.054	0.056	0.057	0.068	0.068	0.067	0.119	0.13	0.123	0.134	0.125	0.0824444	2.34259	1.22811
gnl|gene4641|XL-9_2-gene4641|rna13543|	emc2.S	0.077	0.083	0.081	0.082	0.098	0.088	0.09	0.097	0.098	0.096	0.11	0.0882222	1.26623	0.340544
gnl|gene19388|XL-9_2-gene19388|rna56655|	emc4.L	0.097	0.09	0.098	0.095	0.113	0.094	0.084	0.081	0.089	0.075	0.083	0.0934444	0.876289	-0.190522
gnl|gene18249|XL-9_2-gene18249|rna53302|	emc7.L	0.109	0.086	0.085	0.093	0.091	0.105	0.094	0.094	0.088	0.074	0.082	0.0938889	0.834862	-0.26039
gnl|gene11942|XL-9_2-gene11942|rna34682|	emc7.S	0.09	0.08	0.082	0.085	0.099	0.098	0.112	0.092	0.078	0.093	0.092	0.0906667	0.944444	-0.0824622
gnl|gene14568|XL-9_2-gene14568|rna42412|	emc8.L	0.081	0.091	0.086	0.097	0.09	0.1	0.093	0.105	0.085	0.087	0.085	0.092	1.17284	0.230006
gnl|gene8314|XL-9_2-gene8314|rna24210|	emc8.S	0.062	0.067	0.066	0.065	0.084	0.078	0.107	0.111	0.117	0.126	0.118	0.0841111	1.83871	0.878694
gnl|gene19671|XL-9_2-gene19671|rna57494|	emc9.L	0.093	0.087	0.084	0.076	0.104	0.083	0.098	0.083	0.109	0.089	0.094	0.0907778	1.03226	0.0458037
gnl|gene1593|XL-9_2-gene1593|rna4655|	emd.S	0.097	0.079	0.111	0.108	0.117	0.098	0.059	0.075	0.092	0.078	0.085	0.0928889	0.860825	-0.216209
gnl|gene15883|XL-9_2-gene15883|rna46408|	eme1.L	0.092	0.094	0.108	0.103	0.104	0.105	0.084	0.093	0.081	0.071	0.067	0.096	0.945652	-0.0806185
gnl|gene18482|XL-9_2-gene18482|rna53966|	emg1.S	0.121	0.094	0.082	0.1	0.103	0.093	0.095	0.094	0.08	0.07	0.067	0.0957778	0.719008	-0.47592
gnl|gene817|XL-9_2-gene817|rna2385|	eml1.S	0.101	0.105	0.102	0.092	0.092	0.093	0.088	0.094	0.084	0.074	0.075	0.0945556	0.881188	-0.182478
gnl|gene38138|XL-9_2-gene38138|rna79182|	eml2.L	0.101	0.103	0.087	0.079	0.087	0.087	0.087	0.101	0.087	0.096	0.084	0.091	0.930693	-0.103623
gnl|gene38777|XL-9_2-gene38777|rna80076|	eml4.L	0.087	0.087	0.09	0.088	0.09	0.092	0.098	0.101	0.098	0.082	0.085	0.0923333	1.14368	0.193681
gnl|gene6064|XL-9_2-gene6064|rna17742|	eml4.S	0.099	0.092	0.089	0.09	0.093	0.088	0.09	0.088	0.086	0.091	0.094	0.0905556	0.878788	-0.186413
gnl|gene15486|XL-9_2-gene15486|rna45212|	emsy.S	0.09	0.082	0.081	0.08	0.094	0.099	0.1	0.097	0.105	0.085	0.087	0.092	1.12222	0.166358
gnl|gene19236|XL-9_2-gene19236|rna56203|	enah.L	0.087	0.093	0.094	0.107	0.1	0.117	0.078	0.085	0.089	0.076	0.075	0.0944444	1	0
gnl|gene46391|XL-9_2-gene46391|rna91125|	endod1.L	0.099	0.096	0.093	0.105	0.099	0.098	0.084	0.083	0.086	0.081	0.076	0.0936667	0.853535	-0.228477
gnl|gene3454|XL-9_2-gene3454|rna10040|	endog.L	0.078	0.112	0.072	0.062	0.083	0.098	0.1	0.103	0.106	0.099	0.087	0.0904444	1.33974	0.421957
gnl|gene11501|XL-9_2-gene11501|rna33413|	endoul.L	0.076	0.075	0.069	0.059	0.073	0.061	0.083	0.076	0.081	0.156	0.191	0.0725556	1.03289	0.0466932
gnl|gene3323|XL-9_2-gene3323|rna9641|	endoul.S	0.086	0.079	0.094	0.083	0.095	0.083	0.097	0.098	0.095	0.086	0.103	0.09	1.12209	0.166192
gnl|gene14337|XL-9_2-gene14337|rna41761|	eno1.L	0.08	0.09	0.077	0.083	0.082	0.083	0.1	0.098	0.109	0.099	0.099	0.0891111	1.29375	0.371559
gnl|gene46477|XL-9_2-gene46477|rna91272|	eno1.S	0.073	0.093	0.075	0.073	0.074	0.077	0.109	0.125	0.105	0.105	0.09	0.0893333	1.57534	0.655665
gnl|gene16868|XL-9_2-gene16868|rna49297|	eno3.L	0.083	0.107	0.08	0.109	0.079	0.085	0.084	0.087	0.099	0.097	0.09	0.0903333	1.12048	0.164119
gnl|gene38618|XL-9_2-gene38618|rna79853|	enoph1.S	0.089	0.087	0.087	0.083	0.095	0.083	0.089	0.082	0.088	0.1	0.117	0.087	0.955056	-0.0663425
gnl|gene20300|XL-9_2-gene20300|rna59279|	enosf1.S	0.092	0.091	0.099	0.088	0.097	0.091	0.088	0.086	0.09	0.085	0.093	0.0913333	0.956522	-0.0641303
gnl|gene47581|XL-9_2-gene47581|rna92785|	enpp1.L	0.093	0.108	0.104	0.109	0.096	0.107	0.081	0.091	0.07	0.071	0.071	0.0954444	0.865591	-0.208242
gnl|gene11505|XL-9_2-gene11505|rna33421|	enpp6.L	0.102	0.104	0.112	0.107	0.106	0.108	0.074	0.077	0.073	0.066	0.07	0.0958889	0.735294	-0.443607
gnl|gene36918|XL-9_2-gene36918|rna77459|	ensa.L	0.094	0.094	0.097	0.097	0.096	0.1	0.095	0.094	0.085	0.074	0.074	0.0946667	0.952128	-0.0707731
gnl|gene9549|XL-9_2-gene9549|rna27789|	entpd2.S	0.124	0.09	0.112	0.116	0.072	0.097	0.077	0.079	0.078	0.075	0.08	0.0938889	0.633065	-0.659576
gnl|gene36835|XL-9_2-gene36835|rna77340|	entpd6.L	0.077	0.089	0.086	0.09	0.09	0.097	0.097	0.102	0.092	0.098	0.083	0.0911111	1.25974	0.333126
gnl|gene1180|XL-9_2-gene1180|rna3435|	eny2.S	0.091	0.093	0.102	0.087	0.11	0.112	0.1	0.082	0.114	0.044	0.065	0.099	1.07692	0.106915
gnl|gene15039|XL-9_2-gene15039|rna43882|	eola1.S	0.099	0.133	0.084	0.091	0.103	0.1	0.068	0.073	0.07	0.095	0.084	0.0912222	0.722222	-0.469485
gnl|gene44096|XL-9_2-gene44096|rna87826|	ep300.L	0.082	0.088	0.092	0.097	0.095	0.094	0.089	0.096	0.097	0.081	0.089	0.0922222	1.17683	0.234905
gnl|gene50487|XL-9_2-gene50487|rna97008|	ep300.S	0.091	0.08	0.101	0.1	0.093	0.107	0.092	0.086	0.082	0.087	0.08	0.0924444	0.923077	-0.115477
gnl|gene7061|XL-9_2-gene7061|rna20613|	ep400.L	0.097	0.095	0.094	0.088	0.107	0.1	0.074	0.086	0.098	0.077	0.085	0.0932222	0.948454	-0.0763509
gnl|gene47498|XL-9_2-gene47498|rna92664|	epb41.L	0.078	0.087	0.081	0.07	0.069	0.094	0.09	0.107	0.113	0.11	0.102	0.0876667	1.41026	0.495957
gnl|gene40522|XL-9_2-gene40522|rna82555|	epb41l1.S	0.094	0.093	0.105	0.106	0.104	0.092	0.094	0.088	0.083	0.067	0.074	0.0954444	0.909574	-0.136736
gnl|gene9546|XL-9_2-gene9546|rna27769|	epb41l1.S	0.148	0.089	0.119	0.114	0.079	0.097	0.058	0.07	0.065	0.072	0.09	0.0932222	0.456081	-1.13264
gnl|gene2281|XL-9_2-gene2281|rna6636|	epb41l2.L	0.106	0.093	0.097	0.088	0.095	0.092	0.091	0.087	0.091	0.074	0.086	0.0933333	0.839623	-0.252187
gnl|gene47349|XL-9_2-gene47349|rna92455|	epb41l3.L	0.118	0.089	0.112	0.104	0.089	0.085	0.081	0.078	0.082	0.069	0.092	0.0931111	0.677966	-0.560715
gnl|gene18771|XL-9_2-gene18771|rna54793|	epb41l4a.S	0.1	0.112	0.091	0.09	0.084	0.098	0.087	0.084	0.095	0.074	0.084	0.0934444	0.895	-0.16004
gnl|gene27842|XL-9_2-gene27842|rna67352|	epc1.S	0.101	0.093	0.093	0.099	0.119	0.098	0.08	0.085	0.077	0.072	0.083	0.0938889	0.80198	-0.318361
gnl|gene10776|XL-9_2-gene10776|rna31313|	epc2.S	0.113	0.104	0.098	0.102	0.097	0.096	0.084	0.07	0.077	0.083	0.076	0.0934444	0.650442	-0.620507
gnl|gene18928|XL-9_2-gene18928|rna55252|	epcam.L	0.082	0.092	0.081	0.093	0.091	0.103	0.097	0.101	0.097	0.089	0.075	0.093	1.20732	0.271805
gnl|gene8648|XL-9_2-gene8648|rna25173|	epcam.S	0.079	0.077	0.085	0.078	0.091	0.09	0.103	0.11	0.102	0.093	0.091	0.0905556	1.34177	0.42414
gnl|gene42484|XL-9_2-gene42484|rna85422|	epdr1.L	0.084	0.098	0.083	0.095	0.102	0.093	0.09	0.098	0.112	0.08	0.066	0.095	1.25	0.321928
gnl|gene8125|XL-9_2-gene8125|rna23671|	epg5.L	0.088	0.093	0.102	0.083	0.094	0.109	0.085	0.094	0.09	0.081	0.081	0.0931111	1.04545	0.0641303
gnl|gene15561|XL-9_2-gene15561|rna45442|	ephb4.S	0.082	0.074	0.073	0.072	0.085	0.106	0.096	0.1	0.091	0.115	0.106	0.0865556	1.16463	0.219877
gnl|gene46404|XL-9_2-gene46404|rna91141|	ephx2.L	0.107	0.103	0.099	0.087	0.089	0.094	0.082	0.081	0.069	0.087	0.102	0.0901111	0.700935	-0.512648
gnl|gene46444|XL-9_2-gene46444|rna91217|	ephx3.S	0.087	0.088	0.091	0.1	0.101	0.106	0.087	0.096	0.092	0.081	0.073	0.0942222	1.08046	0.111645
gnl|gene12783|XL-9_2-gene12783|rna37163|	epn1.L	0.136	0.141	0.093	0.092	0.073	0.096	0.067	0.086	0.058	0.074	0.085	0.0935556	0.529412	-0.917538
gnl|gene12485|XL-9_2-gene12485|rna36296|	epn1.S	0.1	0.087	0.125	0.104	0.099	0.097	0.08	0.087	0.079	0.062	0.081	0.0953333	0.83	-0.268817
gnl|gene19623|XL-9_2-gene19623|rna57346|	eprs1.L	0.083	0.088	0.085	0.09	0.083	0.085	0.096	0.099	0.093	0.099	0.098	0.0891111	1.15663	0.209923
gnl|gene47246|XL-9_2-gene47246|rna92317|	eprs1.S	0.09	0.091	0.083	0.088	0.09	0.091	0.094	0.098	0.092	0.09	0.092	0.0907778	1.05556	0.0780025
gnl|gene4486|XL-9_2-gene4486|rna13096|	eps15.L	0.082	0.08	0.097	0.093	0.101	0.102	0.091	0.086	0.094	0.09	0.084	0.0917778	1.09756	0.134301
gnl|gene2176|XL-9_2-gene2176|rna6311|	eps15.S	0.089	0.088	0.111	0.092	0.097	0.098	0.089	0.088	0.091	0.083	0.075	0.0936667	1.00562	0.00808235
gnl|gene37084|XL-9_2-gene37084|rna77694|	eps15l1.L	0.089	0.065	0.098	0.08	0.099	0.096	0.104	0.088	0.113	0.085	0.082	0.0924444	1.12921	0.175318
gnl|gene7634|XL-9_2-gene7634|rna22253|	eps8.L	0.106	0.105	0.101	0.097	0.104	0.091	0.092	0.087	0.077	0.062	0.078	0.0955556	0.773585	-0.370368
gnl|gene633|XL-9_2-gene633|rna1846|	eps8.S	0.103	0.107	0.108	0.1	0.102	0.116	0.089	0.088	0.062	0.068	0.058	0.0972222	0.728155	-0.457682
gnl|gene7247|XL-9_2-gene7247|rna21140|	eps8l1.S	0.091	0.101	0.074	0.085	0.11	0.084	0.086	0.087	0.102	0.084	0.097	0.0911111	1.03846	0.0544478
gnl|gene34919|XL-9_2-gene34919|rna74627|	eral1.L	0.104	0.101	0.097	0.092	0.105	0.099	0.071	0.087	0.076	0.085	0.084	0.0924444	0.783654	-0.351712
gnl|gene14348|XL-9_2-gene14348|rna41795|	erap1.L	0.086	0.091	0.093	0.097	0.092	0.099	0.096	0.091	0.092	0.085	0.081	0.093	1.06395	0.0894351
gnl|gene11580|XL-9_2-gene11580|rna33632|	erc1.L	0.096	0.091	0.093	0.093	0.097	0.098	0.089	0.091	0.09	0.082	0.078	0.0931111	0.942708	-0.0851166
gnl|gene19095|XL-9_2-gene19095|rna55754|	ercc1.L	0.118	0.108	0.107	0.095	0.098	0.092	0.079	0.08	0.078	0.062	0.084	0.095	0.669492	-0.578862
gnl|gene16312|XL-9_2-gene16312|rna47640|	ercc2.L	0.081	0.075	0.092	0.09	0.098	0.102	0.109	0.093	0.1	0.087	0.072	0.0933333	1.19136	0.252607
gnl|gene44466|XL-9_2-gene44466|rna88398|	ercc3.L	0.076	0.059	0.074	0.077	0.1	0.102	0.103	0.104	0.12	0.109	0.075	0.0905556	1.47368	0.559427
gnl|gene40709|XL-9_2-gene40709|rna82834|	ercc4.L	0.082	0.085	0.091	0.087	0.085	0.095	0.099	0.095	0.094	0.096	0.091	0.0903333	1.15244	0.20469
gnl|gene12933|XL-9_2-gene12933|rna37580|	ercc5.L	0.087	0.08	0.096	0.09	0.105	0.104	0.093	0.093	0.088	0.082	0.082	0.0928889	1.04023	0.0569024
gnl|gene11103|XL-9_2-gene11103|rna32268|	ercc6l.L	0.13	0.11	0.1	0.091	0.087	0.08	0.086	0.08	0.072	0.069	0.094	0.0928889	0.584615	-0.77444
gnl|gene17026|XL-9_2-gene17026|rna49750|	ergic1.S	0.085	0.078	0.101	0.089	0.093	0.112	0.093	0.092	0.098	0.077	0.082	0.0934444	1.11765	0.160465
gnl|gene2418|XL-9_2-gene2418|rna7047|	ergic2.S	0.036	0.041	0.045	0.028	0.035	0.028	0.147	0.167	0.152	0.161	0.158	0.0754444	4.43056	2.14749
gnl|gene17228|XL-9_2-gene17228|rna50299|	ergic3.S	0.096	0.093	0.102	0.101	0.101	0.1	0.086	0.085	0.087	0.072	0.076	0.0945556	0.895833	-0.158698
gnl|gene18134|XL-9_2-gene18134|rna52989|	eri1.L	0.086	0.085	0.095	0.08	0.088	0.109	0.084	0.086	0.105	0.097	0.085	0.0908889	1.11047	0.151164
gnl|gene46427|XL-9_2-gene46427|rna91189|	eri3.L	0.11	0.085	0.117	0.083	0.103	0.084	0.093	0.072	0.096	0.074	0.084	0.0936667	0.763636	-0.389042
gnl|gene17374|XL-9_2-gene17374|rna50714|	erlec1.L	0.096	0.092	0.096	0.093	0.1	0.09	0.088	0.092	0.091	0.079	0.084	0.0931111	0.953125	-0.0692627
gnl|gene5833|XL-9_2-gene5833|rna17073|	erlec1.S	0.108	0.103	0.11	0.085	0.093	0.085	0.092	0.088	0.088	0.072	0.077	0.0946667	0.814815	-0.295456
gnl|gene3612|XL-9_2-gene3612|rna10505|	erlin2.L	0.091	0.092	0.1	0.089	0.094	0.097	0.092	0.087	0.092	0.079	0.086	0.0926667	0.983516	-0.0239789
gnl|gene5461|XL-9_2-gene5461|rna16005|	erlin2.S	0.098	0.109	0.101	0.1	0.091	0.105	0.081	0.085	0.085	0.072	0.073	0.095	0.867347	-0.205319
gnl|gene10188|XL-9_2-gene10188|rna29622|	ermp1.L	0.086	0.094	0.088	0.095	0.092	0.099	0.094	0.092	0.088	0.087	0.086	0.092	1.04651	0.0655883
gnl|gene18412|XL-9_2-gene18412|rna53786|	ero1a.L	0.08	0.083	0.08	0.08	0.086	0.082	0.103	0.101	0.108	0.095	0.101	0.0892222	1.30625	0.385431
gnl|gene13069|XL-9_2-gene13069|rna37983|	erp29.S	0.087	0.097	0.091	0.095	0.094	0.094	0.093	0.093	0.1	0.075	0.083	0.0937778	1.1092	0.149514
gnl|gene291|XL-9_2-gene291|rna834|	erp44.L	0.064	0.074	0.052	0.062	0.072	0.066	0.102	0.108	0.092	0.158	0.151	0.0768889	1.5625	0.643856
gnl|gene2588|XL-9_2-gene2588|rna7518|	errfi1.S	0.095	0.09	0.083	0.108	0.101	0.098	0.075	0.083	0.086	0.098	0.082	0.091	0.889474	-0.168976
gnl|gene12237|XL-9_2-gene12237|rna35567|	esco2.S	0.046	0.053	0.077	0.087	0.114	0.102	0.114	0.111	0.122	0.094	0.081	0.0917778	2.53261	1.34062
gnl|gene13081|XL-9_2-gene13081|rna38010|	esd.L	0.072	0.117	0.085	0.11	0.076	0.116	0.073	0.111	0.073	0.092	0.077	0.0925556	1.27778	0.353637
gnl|gene8426|XL-9_2-gene8426|rna24532|	esf1.L	0.083	0.072	0.095	0.097	0.108	0.103	0.096	0.09	0.091	0.081	0.082	0.0927778	1.09036	0.124806
gnl|gene36376|XL-9_2-gene36376|rna76680|	esg2-a	0.084	0.072	0.088	0.08	0.099	0.096	0.102	0.101	0.11	0.089	0.08	0.0924444	1.25595	0.328782
gnl|gene39542|XL-9_2-gene39542|rna81162|	espl1.L	0.065	0.07	0.09	0.095	0.089	0.103	0.091	0.102	0.11	0.107	0.078	0.0905556	1.63077	0.705553
gnl|gene15654|XL-9_2-gene15654|rna45711|	espl1.S	0.081	0.085	0.093	0.096	0.084	0.089	0.092	0.089	0.097	0.104	0.09	0.0895556	1.14815	0.199309
gnl|gene13565|XL-9_2-gene13565|rna39476|	espn.L	0.085	0.084	0.109	0.095	0.1	0.113	0.081	0.085	0.086	0.094	0.068	0.0931111	1.00588	0.00846158
gnl|gene8023|XL-9_2-gene8023|rna23382|	esrp1.L	0.135	0.125	0.136	0.108	0.091	0.089	0.073	0.063	0.063	0.044	0.073	0.0981111	0.466667	-1.09954
gnl|gene7740|XL-9_2-gene7740|rna22608|	ess2.L	0.081	0.082	0.091	0.09	0.104	0.09	0.098	0.093	0.101	0.085	0.084	0.0922222	1.19753	0.260063
gnl|gene6659|XL-9_2-gene6659|rna19490|	etaa1.L	0.085	0.089	0.1	0.091	0.097	0.115	0.098	0.103	0.08	0.076	0.067	0.0953333	1.07647	0.106309
gnl|gene17644|XL-9_2-gene17644|rna51556|	etf1.S	0.086	0.086	0.092	0.086	0.09	0.085	0.095	0.1	0.088	0.097	0.094	0.0897778	1.09302	0.128324
gnl|gene19839|XL-9_2-gene19839|rna57939|	etfa.L	0.065	0.07	0.051	0.075	0.062	0.059	0.087	0.09	0.103	0.17	0.169	0.0735556	1.48462	0.570089
gnl|gene3052|XL-9_2-gene3052|rna8841|	etfa.S	0.087	0.098	0.097	0.098	0.091	0.1	0.089	0.093	0.087	0.082	0.078	0.0933333	1.03448	0.0489096
gnl|gene17557|XL-9_2-gene17557|rna51284|	etfb.L	0.084	0.097	0.09	0.106	0.094	0.104	0.088	0.094	0.091	0.078	0.076	0.0942222	1.10119	0.139064
gnl|gene49042|XL-9_2-gene49042|rna94857|	etfb.S	0.098	0.094	0.098	0.098	0.096	0.097	0.093	0.092	0.089	0.069	0.075	0.095	0.923469	-0.114864
gnl|gene12890|XL-9_2-gene12890|rna37459|	etfdh.L	0.076	0.08	0.072	0.077	0.079	0.074	0.09	0.093	0.091	0.135	0.135	0.0813333	1.21053	0.275634
gnl|gene5297|XL-9_2-gene5297|rna15505|	etfrf1.L	0.091	0.104	0.036	0.055	0.073	0.064	0.113	0.134	0.11	0.1	0.12	0.0866667	1.34066	0.422943
gnl|gene1959|XL-9_2-gene1959|rna5698|	ethe1.L	0.098	0.09	0.103	0.093	0.096	0.095	0.09	0.086	0.092	0.076	0.081	0.0936667	0.908163	-0.138976
gnl|gene46466|XL-9_2-gene46466|rna91257|	ethe1.S	0.052	0.033	0.035	0.036	0.042	0.022	0.126	0.136	0.107	0.208	0.202	0.0654444	2.33654	1.22437
gnl|gene13529|XL-9_2-gene13529|rna39371|	evi5.L	0.068	0.076	0.079	0.088	0.1	0.11	0.096	0.101	0.104	0.098	0.079	0.0913333	1.50735	0.592017
gnl|gene14831|XL-9_2-gene14831|rna43267|	ewsr1.L	0.054	0.07	0.037	0.043	0.06	0.05	0.115	0.135	0.13	0.17	0.135	0.0771111	2.4537	1.29496
gnl|gene17310|XL-9_2-gene17310|rna50510|	exd1.L	0.091	0.072	0.085	0.085	0.09	0.084	0.094	0.098	0.085	0.108	0.108	0.0871111	1.00549	0.0079052
gnl|gene28|XL-9_2-gene28|rna86|	exd2.L	0.092	0.089	0.091	0.09	0.097	0.096	0.092	0.087	0.089	0.086	0.09	0.0914444	0.956522	-0.0641303
gnl|gene14219|XL-9_2-gene14219|rna41424|	exd2.S	0.093	0.086	0.09	0.088	0.09	0.093	0.107	0.1	0.093	0.087	0.075	0.0933333	1.03763	0.0532982
gnl|gene10190|XL-9_2-gene10190|rna29627|	exoc1.S	0.059	0.043	0.07	0.072	0.099	0.104	0.118	0.113	0.127	0.117	0.078	0.0894444	2.0339	1.02425
gnl|gene2358|XL-9_2-gene2358|rna6862|	exoc2.L	0.058	0.058	0.069	0.055	0.065	0.085	0.126	0.132	0.121	0.133	0.097	0.0854444	2.18103	1.12501
gnl|gene7121|XL-9_2-gene7121|rna20793|	exoc3.L	0.063	0.05	0.069	0.074	0.102	0.113	0.103	0.107	0.127	0.113	0.08	0.0897778	1.85714	0.893085
gnl|gene14003|XL-9_2-gene14003|rna40794|	exoc4.L	0.051	0.044	0.056	0.064	0.077	0.082	0.111	0.111	0.117	0.17	0.116	0.0792222	2.23529	1.16046
gnl|gene18601|XL-9_2-gene18601|rna54303|	exoc5.L	0.072	0.062	0.081	0.079	0.095	0.102	0.112	0.105	0.107	0.103	0.084	0.0905556	1.47222	0.557995
gnl|gene10677|XL-9_2-gene10677|rna31022|	exoc6b.L	0.081	0.053	0.099	0.093	0.101	0.109	0.099	0.09	0.096	0.093	0.086	0.0912222	1.14815	0.199309
gnl|gene4300|XL-9_2-gene4300|rna12523|	exoc6b.S	0.085	0.072	0.095	0.095	0.099	0.108	0.097	0.098	0.093	0.083	0.076	0.0935556	1.12353	0.168038
gnl|gene4420|XL-9_2-gene4420|rna12888|	exoc7.L	0.078	0.061	0.083	0.09	0.098	0.1	0.101	0.105	0.102	0.098	0.085	0.0908889	1.32692	0.408085
gnl|gene16172|XL-9_2-gene16172|rna47262|	exoc8.S	0.078	0.058	0.099	0.091	0.105	0.109	0.099	0.098	0.101	0.087	0.074	0.0931111	1.27564	0.351222
gnl|gene9128|XL-9_2-gene9128|rna26540|	exog.L	0.097	0.101	0.101	0.094	0.106	0.1	0.089	0.079	0.077	0.074	0.082	0.0937778	0.804124	-0.314511
[truncated: 5,727 more rows]
