# Supplementary material for: Decoding protein phosphorylation during oocyte meiotic divisions using phosphoproteomics
Source: eLife. 2025 Jul 17;13:RP104255. doi: 10.7554/eLife.104255 (PMC12270485; doi:10.7554/eLife.104255)
Supplement: Supplementary file 3. [file elife-104255-supp3.xlsx]

## Sheet: 220128_OocyteMat_PhosDetrendedO
P_Set	P_Form	GeneSymbol	GeneSymbol_Xenbase	Protein_Reference	Phosphosite_Position	Phosphosite_LocalizeScore	Phosphosite_Motif	Peptide_Sequence	GeneSymbol_More	PP_Reference	PP_Match	Human_Residue	Human_Motif	detrended P level	0	2	3	4	5	6	7	8	9	pp1	pp2	Chan_1_Prot	Chan_2_Prot	Chan_3_Prot	Chan_4_Prot	Chan_5_Prot	Chan_6_Prot	Chan_7_Prot	Chan_8_Prot	Chan_9_Prot	Chan_10_Prot	Chan_11_Prot	Chan_1	Chan_2	Chan_3	Chan_4	Chan_5	Chan_6	Chan_7	Chan_8	Chan_9	Chan_10	Chan_11
2678	Form_3292	AAK1	LOC108711545	gnl|gene35365|XL-9_2-gene35365|rna75320|	652	18.3	TTTPSGSPRTSQQ	K.SATTTPSGSPR.T	AP2-associated protein kinase 1						0.061	0.035	0.124	0.085	0.12	0.131	0.141	0.142	0.137	0.009	0.015	0.084	0.078	0.08	0.103	0.105	0.099	0.093	0.088	0.104	0.097	0.069	0.055	0.029	0.106	0.093	0.134	0.138	0.14	0.133	0.152	0.009	0.011
2679	Form_3294	AAK1	LOC108711545	gnl|gene35365|XL-9_2-gene35365|rna75320|	917	5000	QDSSWKTPPANDG	K.TPPANDGHIK.I	AP2-associated protein kinase 1						0.011	0.009	0.149	0.112	0.138	0.134	0.129	0.121	0.16	0.008	0.029	0.084	0.078	0.08	0.103	0.105	0.099	0.093	0.088	0.104	0.097	0.069	0.01	0.007	0.126	0.122	0.153	0.14	0.126	0.112	0.175	0.008	0.021
2680	Form_3293	AAK1	LOC108711545	gnl|gene35365|XL-9_2-gene35365|rna75320|	1123	52.8	SDVAVGSPSMKTS	R.NSDVAVGSPSMK.T	AP2-associated protein kinase 1						0.024	0.054	0.239	0.159	0.13	0.141	0.106	0.083	0.054	0.004	0.007	0.084	0.078	0.08	0.103	0.105	0.099	0.093	0.088	0.104	0.097	0.069	0.022	0.045	0.206	0.176	0.147	0.15	0.106	0.079	0.06	0.004	0.005
4136	Form_5076	AAK1	aak1.S	gnl|gene4997|XL-9_2-gene4997|rna14603|	1124	54.2	SEVPVGSPSMKTS	R.NSEVPVGSPSMK.T	AP2-associated protein kinase 1						0.034	0.079	0.197	0.189	0.126	0.158	0.082	0.073	0.047	0.004	0.009	0.076	0.072	0.09	0.091	0.102	0.095	0.102	0.11	0.103	0.087	0.073	0.028	0.061	0.19	0.184	0.138	0.161	0.09	0.086	0.052	0.004	0.007
5225	Form_6395	AATF	aatf.S	gnl|gene9782|XL-9_2-gene9782|rna28444|	57	31.7	SQLRRTSASFVDT	R.TSASFVDTDR.R	Protein AATF						0.084	0.064	0.14	0.116	0.113	0.134	0.092	0.122	0.093	0.014	0.027	0.076	0.083	0.077	0.094	0.103	0.105	0.098	0.101	0.107	0.092	0.063	0.068	0.057	0.115	0.117	0.125	0.151	0.096	0.132	0.107	0.014	0.018
4254	Form_5220	ABCB5	LOC108716436	gnl|gene51030|XL-9_2-gene51030|rna97772|	681	13.7	SKISTRSEHLEEQ	K.ISTRSEHLEEQEEK.S	ATP-binding cassette sub-family B member 5						0.232	0.076	0.232	0.182	0.079	0.067	0.031	0.049	0.045	0.006	0.002	0.232	0.066	0.194	0.142	0.053	0.069	0.037	0.047	0.042	0.025	0.092	0.374	0.035	0.312	0.18	0.029	0.032	0.008	0.016	0.013	0.001	0.001
2148	Form_2629	ABCC1	abcc1.L	gnl|gene20417|XL-9_2-gene20417|rna59639|	912;915	35.3	NLQRQLSASSETK;RQLSASSETKSLN	R.QLSASSETK.S	Multidrug resistance-associated protein 1						0.03	0.04	0.21	0.092	0.136	0.121	0.11	0.116	0.139	0.002	0.004	0.088	0.089	0.089	0.093	0.092	0.095	0.096	0.099	0.086	0.083	0.09	0.029	0.039	0.204	0.093	0.136	0.125	0.115	0.125	0.13	0.002	0.004
908	Form_1113	ABCC10	abcc10.L	gnl|gene14261|XL-9_2-gene14261|rna41555|	856	108.2	FYPDEQSLEEDEK	K.NHVFYPDEQSLEEDEK.E	Multidrug resistance-associated protein 7						0.097	0.051	0.11	0.11	0.119	0.121	0.113	0.101	0.136	0.009	0.032	0.097	0.095	0.089	0.093	0.091	0.1	0.09	0.087	0.089	0.09	0.078	0.103	0.053	0.107	0.112	0.118	0.132	0.111	0.096	0.132	0.009	0.027
23	Form___34	ABCF1	abcf1.L	gnl|gene10093|XL-9_2-gene10093|rna29341|	43	94.6	SFFEELSADNKQA	K.SFFEELSADNK.Q	ATP-binding cassette sub-family F member 1 (Fragment)						0.064	0.029	0.082	0.091	0.146	0.124	0.157	0.137	0.16	0.003	0.007	0.083	0.094	0.088	0.092	0.085	0.09	0.089	0.091	0.092	0.1	0.095	0.059	0.031	0.081	0.094	0.139	0.125	0.156	0.139	0.165	0.003	0.007
23	Form___48	ABCF1	abcf1.L	gnl|gene10093|XL-9_2-gene10093|rna29341|	37	157.4	DKKGKKSFFEELS	K.SFFEELSADNK.Q	ATP-binding cassette sub-family F member 1 (Fragment)						0.004	0.004	0.106	0.088	0.138	0.109	0.17	0.161	0.211	0.001	0.008	0.083	0.094	0.088	0.092	0.085	0.09	0.089	0.091	0.092	0.1	0.095	0.004	0.004	0.104	0.09	0.131	0.109	0.169	0.163	0.216	0.001	0.009
24	Form___35	ABCF1	abcf1.L	gnl|gene10093|XL-9_2-gene10093|rna29341|	101	5000	ERLKKLSVQASDE	K.KLSVQASDEEPDEAPAPK.G	ATP-binding cassette sub-family F member 1 (Fragment)						0.011	0.014	0.096	0.091	0.097	0.094	0.089	0.101	0.096	0.162	0.15	0.083	0.094	0.088	0.092	0.085	0.09	0.089	0.091	0.092	0.1	0.095	0.01	0.014	0.092	0.091	0.09	0.092	0.086	0.1	0.096	0.176	0.155
24	Form___36	ABCF1	abcf1.L	gnl|gene10093|XL-9_2-gene10093|rna29341|	101;105	5000	ERLKKLSVQASDE;KLSVQASDEEPDE	K.KLSVQASDEEPDEAPAPK.G	ATP-binding cassette sub-family F member 1 (Fragment)						0.053	0.046	0.1	0.184	0.108	0.116	0.093	0.091	0.191	0.005	0.013	0.083	0.094	0.088	0.092	0.085	0.09	0.089	0.091	0.092	0.1	0.095	0.049	0.048	0.098	0.188	0.102	0.116	0.092	0.092	0.195	0.005	0.014
24	Form___37	ABCF1	abcf1.L	gnl|gene10093|XL-9_2-gene10093|rna29341|	105	5000	KLSVQASDEEPDE	K.LSVQASDEEPDEAPAPK.G	ATP-binding cassette sub-family F member 1 (Fragment)						0.268	0.149	0.09	0.066	0.086	0.08	0.076	0.085	0.086	0.004	0.008	0.083	0.094	0.088	0.092	0.085	0.09	0.089	0.091	0.092	0.1	0.095	0.252	0.158	0.09	0.069	0.083	0.081	0.077	0.088	0.089	0.005	0.009
25	Form___33	ABCF1	abcf1.L	gnl|gene10093|XL-9_2-gene10093|rna29341|	134	245.5	ALGEDQSDEEEEE	K.QGSNVFAALGEDQSDEEEEEQISNK.E	ATP-binding cassette sub-family F member 1 (Fragment)						0.102	0.05	0.084	0.076	0.101	0.096	0.163	0.163	0.149	0.008	0.008	0.083	0.094	0.088	0.092	0.085	0.09	0.089	0.091	0.092	0.1	0.095	0.095	0.053	0.083	0.078	0.096	0.097	0.162	0.166	0.153	0.009	0.008
25	Form___38	ABCF1	abcf1.L	gnl|gene10093|XL-9_2-gene10093|rna29341|	143	345.6	EEEEQISNKESSK	K.QGSNVFAALGEDQSDEEEEEQISNK.E	ATP-binding cassette sub-family F member 1 (Fragment)						0.111	0.066	0.081	0.088	0.1	0.128	0.124	0.127	0.155	0.009	0.011	0.083	0.094	0.088	0.092	0.085	0.09	0.089	0.091	0.092	0.1	0.095	0.103	0.069	0.08	0.091	0.095	0.129	0.123	0.129	0.159	0.01	0.012
25	Form___39	ABCF1	abcf1.L	gnl|gene10093|XL-9_2-gene10093|rna29341|	134;143	345.6	ALGEDQSDEEEEE;EEEEQISNKESSK	K.QGSNVFAALGEDQSDEEEEEQISNK.E	ATP-binding cassette sub-family F member 1 (Fragment)						0.102	0.048	0.085	0.074	0.112	0.093	0.155	0.128	0.187	0.004	0.01	0.083	0.094	0.088	0.092	0.085	0.09	0.089	0.091	0.092	0.1	0.095	0.095	0.051	0.084	0.076	0.107	0.094	0.155	0.131	0.193	0.004	0.011
25	Form___43	ABCF1	abcf1.L	gnl|gene10093|XL-9_2-gene10093|rna29341|	123;134	245.5	GGKKQGSNVFAAL;ALGEDQSDEEEEE	K.KQGSNVFAALGEDQSDEEEEEQISNK.E	ATP-binding cassette sub-family F member 1 (Fragment)						0.016	0.01	0.073	0.095	0.145	0.143	0.146	0.14	0.193	0.02	0.02	0.083	0.094	0.088	0.092	0.085	0.09	0.089	0.091	0.092	0.1	0.095	0.015	0.01	0.071	0.097	0.137	0.143	0.144	0.142	0.197	0.022	0.021
26	Form___31	ABCF1	abcf1.L	gnl|gene10093|XL-9_2-gene10093|rna29341|	204	5000	KAAPVDSDAEDEK	K.AAPVDSDAEDEK.K	ATP-binding cassette sub-family F member 1 (Fragment)						0.094	0.071	0.137	0.111	0.127	0.117	0.111	0.106	0.112	0.005	0.008	0.083	0.094	0.088	0.092	0.085	0.09	0.089	0.091	0.092	0.1	0.095	0.087	0.075	0.135	0.114	0.121	0.118	0.111	0.108	0.115	0.006	0.009
27	Form___30	ABCF1	abcf1.L	gnl|gene10093|XL-9_2-gene10093|rna29341|	234	97	KATSVDSDAEEEK	K.ATSVDSDAEEEK.K	ATP-binding cassette sub-family F member 1 (Fragment)						0.085	0.101	0.137	0.132	0.119	0.112	0.099	0.093	0.113	0.003	0.006	0.083	0.094	0.088	0.092	0.085	0.09	0.089	0.091	0.092	0.1	0.095	0.079	0.106	0.135	0.136	0.113	0.113	0.099	0.095	0.116	0.003	0.006
28	Form___32	ABCF1	abcf1.L	gnl|gene10093|XL-9_2-gene10093|rna29341|	267;270;274	156	IEEDRVSGESNEG;DRVSGESNEGSGD;GESNEGSGDEEGE	R.FGALDIEEDRVSGESNEGSGDEEGETEEK.T	ATP-binding cassette sub-family F member 1 (Fragment)						0.111	0.054	0.079	0.085	0.146	0.108	0.106	0.125	0.128	0.021	0.035	0.083	0.094	0.088	0.092	0.085	0.09	0.089	0.091	0.092	0.1	0.095	0.103	0.057	0.078	0.088	0.139	0.109	0.106	0.127	0.132	0.024	0.037
28	Form___41	ABCF1	abcf1.L	gnl|gene10093|XL-9_2-gene10093|rna29341|	267;274	156	IEEDRVSGESNEG;GESNEGSGDEEGE	R.FGALDIEEDRVSGESNEGSGDEEGETEEK.T	ATP-binding cassette sub-family F member 1 (Fragment)						0.078	0.041	0.063	0.068	0.114	0.095	0.163	0.168	0.198	0.004	0.008	0.083	0.094	0.088	0.092	0.085	0.09	0.089	0.091	0.092	0.1	0.095	0.072	0.043	0.062	0.07	0.108	0.096	0.162	0.171	0.204	0.004	0.009
28	Form___44	ABCF1	abcf1.L	gnl|gene10093|XL-9_2-gene10093|rna29341|	274	156	GESNEGSGDEEGE	R.FGALDIEEDRVSGESNEGSGDEEGETEEK.T	ATP-binding cassette sub-family F member 1 (Fragment)						0.153	0.063	0.095	0.091	0.114	0.085	0.126	0.11	0.146	0.007	0.009	0.083	0.094	0.088	0.092	0.085	0.09	0.089	0.091	0.092	0.1	0.095	0.143	0.066	0.094	0.094	0.109	0.086	0.126	0.112	0.151	0.008	0.01
28	Form___46	ABCF1	abcf1.L	gnl|gene10093|XL-9_2-gene10093|rna29341|	267	137.9	IEEDRVSGESNEG	R.FGALDIEEDRVSGESNEGSGDEEGETEEK.T	ATP-binding cassette sub-family F member 1 (Fragment)						0.069	0.046	0.064	0.072	0.102	0.111	0.14	0.176	0.199	0.01	0.01	0.083	0.094	0.088	0.092	0.085	0.09	0.089	0.091	0.092	0.1	0.095	0.064	0.048	0.063	0.074	0.097	0.111	0.139	0.178	0.204	0.011	0.011
28	Form___47	ABCF1	abcf1.L	gnl|gene10093|XL-9_2-gene10093|rna29341|	267;270	150.7	IEEDRVSGESNEG;DRVSGESNEGSGD	R.FGALDIEEDRVSGESNEGSGDEEGETEEK.T	ATP-binding cassette sub-family F member 1 (Fragment)						0.124	0.062	0.088	0.097	0.108	0.124	0.113	0.145	0.126	0.006	0.007	0.083	0.094	0.088	0.092	0.085	0.09	0.089	0.091	0.092	0.1	0.095	0.115	0.065	0.087	0.1	0.103	0.125	0.113	0.148	0.13	0.007	0.007
29	Form___42	ABCF1	abcf1.L	gnl|gene10093|XL-9_2-gene10093|rna29341|	285	177.6	GETEEKTAAEDPF	K.TAAEDPFANLSK.K	ATP-binding cassette sub-family F member 1 (Fragment)						0.029	0.022	0.089	0.09	0.111	0.121	0.146	0.184	0.2	0.001	0.008	0.083	0.094	0.088	0.092	0.085	0.09	0.089	0.091	0.092	0.1	0.095	0.027	0.023	0.087	0.092	0.105	0.121	0.145	0.186	0.205	0.001	0.008
30	Form___40	ABCF1	abcf1.L	gnl|gene10093|XL-9_2-gene10093|rna29341|	328	55.6	ENDFSVSQAELSS	K.ATAAENDFSVSQAELSSR.Q	ATP-binding cassette sub-family F member 1 (Fragment)						0.08	0.065	0.122	0.1	0.113	0.127	0.11	0.146	0.121	0.007	0.01	0.083	0.094	0.088	0.092	0.085	0.09	0.089	0.091	0.092	0.1	0.095	0.074	0.068	0.12	0.103	0.107	0.128	0.109	0.148	0.124	0.008	0.011
30	Form___45	ABCF1	abcf1.L	gnl|gene10093|XL-9_2-gene10093|rna29341|	333	16.3	VSQAELSSRQAML	K.ATAAENDFSVSQAELSSR.Q	ATP-binding cassette sub-family F member 1 (Fragment)						0.026	0.016	0.116	0.113	0.122	0.147	0.151	0.136	0.155	0.01	0.007	0.083	0.094	0.088	0.092	0.085	0.09	0.089	0.091	0.092	0.1	0.095	0.024	0.017	0.114	0.116	0.116	0.148	0.15	0.138	0.159	0.011	0.007
2328	Form_2864	ABI1	mastl.S	gnl|gene26122|XL-9_2-gene26122|rna65622|	467	5000	HDLVEKSPEQELL	K.SPEQELLQDK.K	Abl interactor 1						0.024	0.024	0.145	0.143	0.131	0.154	0.118	0.128	0.125	0.003	0.006	0.081	0.077	0.102	0.095	0.108	0.098	0.096	0.095	0.091	0.074	0.082	0.02	0.019	0.153	0.14	0.146	0.156	0.117	0.125	0.117	0.002	0.005
2329	Form_2863	ABI1	mastl.S	gnl|gene26122|XL-9_2-gene26122|rna65622|	685	63.4	INASNMSEPSKIS	R.SYNSTINASNMSEPSK.I	Abl interactor 1						0.025	0.022	0.073	0.091	0.122	0.162	0.137	0.163	0.178	0.012	0.015	0.081	0.077	0.102	0.095	0.108	0.098	0.096	0.095	0.091	0.074	0.082	0.021	0.018	0.078	0.09	0.137	0.166	0.137	0.161	0.169	0.009	0.013
2330	Form_2862	ABI1	mastl.S	gnl|gene26122|XL-9_2-gene26122|rna65622|	694	31.9	SKISMNSADKIHF	K.ISMNSADK.I	Abl interactor 1						0.002	0.014	0.142	0.075	0.137	0.124	0.163	0.132	0.195	0.005	0.012	0.081	0.077	0.102	0.095	0.108	0.098	0.096	0.095	0.091	0.074	0.082	0.002	0.011	0.149	0.073	0.152	0.125	0.161	0.129	0.183	0.004	0.01
4411	Form_5415	ABI2	abi2.L	gnl|gene5840|XL-9_2-gene5840|rna17100|	183	25.8	PTQKPPSPPMTGK	R.TTPPTQKPPSPPMTGK.G	Abl interactor 2	GN:ABI2|Abi-2|human|Q9NYB9	0	183	PTQKPPSPPMSGK	NaN	0.102	0.083	0.145	0.117	0.122	0.104	0.08	0.082	0.074	0.026	0.065	0.097	0.086	0.08	0.088	0.091	0.101	0.092	0.084	0.092	0.099	0.089	0.11	0.079	0.129	0.114	0.123	0.117	0.082	0.077	0.076	0.029	0.064
4412	Form_5414	ABI2	abi2.L	gnl|gene5840|XL-9_2-gene5840|rna17100|	228	5000	APPQQQSPVRTAS	R.NMAPPQQQSPVR.T	Abl interactor 2						0.064	0.069	0.136	0.109	0.117	0.113	0.096	0.104	0.11	0.03	0.052	0.097	0.086	0.08	0.088	0.091	0.101	0.092	0.084	0.092	0.099	0.089	0.069	0.066	0.121	0.107	0.119	0.127	0.098	0.097	0.113	0.033	0.052
981	Form_1206	ABR	abr.L	gnl|gene1453|XL-9_2-gene1453|rna4231|	213	37.2	DESPTMSPQLSAR	R.EGSETMPYIDESPTMSPQLSAR.S	Active breakpoint cluster region-related protein	GN:ABR|ABR|human|Q12979	0	57	DESPTMSPQLSAR	NaN	0.037	0.009	0.038	0.053	0.051	0.083	0.179	0.297	0.227	0.008	0.018	0.08	0.085	0.091	0.118	0.105	0.099	0.083	0.079	0.083	0.089	0.089	0.034	0.009	0.04	0.072	0.062	0.095	0.172	0.271	0.218	0.008	0.018
3429	Form_4219	ACAA1	acaa1.L	gnl|gene4285|XL-9_2-gene4285|rna12480|	152	75.9	ESMSLRSVGSPGD	R.SVGSPGDISSR.T	3-ketoacyl-CoA thiolase, peroxisomal						0.111	0.077	0.13	0.134	0.107	0.133	0.091	0.089	0.104	0.014	0.009	0.085	0.086	0.086	0.084	0.09	0.089	0.098	0.101	0.099	0.093	0.089	0.104	0.073	0.124	0.125	0.107	0.131	0.099	0.1	0.114	0.014	0.009
3429	Form_4220	ACAA1	acaa1.L	gnl|gene4285|XL-9_2-gene4285|rna12480|	155	58.6	SLRSVGSPGDISS	R.SVGSPGDISSR.T	3-ketoacyl-CoA thiolase, peroxisomal						0.142	0.072	0.148	0.108	0.126	0.099	0.098	0.075	0.11	0.006	0.014	0.085	0.086	0.086	0.084	0.09	0.089	0.098	0.101	0.099	0.093	0.089	0.134	0.069	0.141	0.101	0.126	0.098	0.107	0.084	0.121	0.006	0.014
4920	Form_6026	ACACB	acacb.L	gnl|gene8281|XL-9_2-gene8281|rna24111|	133	20.7	KFILGSSEDNSDD	K.FILGSSEDNSDDDELAYGSFK.T	Acetyl-CoA carboxylase 2						0.127	0.09	0.074	0.102	0.095	0.083	0.136	0.13	0.147	0.007	0.009	0.096	0.093	0.097	0.09	0.099	0.104	0.086	0.086	0.092	0.076	0.08	0.132	0.09	0.077	0.099	0.102	0.093	0.126	0.121	0.146	0.006	0.008
4920	Form_6027	ACACB	acacb.L	gnl|gene8281|XL-9_2-gene8281|rna24111|	133;137	59.1	KFILGSSEDNSDD;GSSEDNSDDDELA	K.FILGSSEDNSDDDELAYGSFK.T	Acetyl-CoA carboxylase 2						0.077	0.052	0.097	0.109	0.123	0.132	0.127	0.132	0.134	0.005	0.012	0.096	0.093	0.097	0.09	0.099	0.104	0.086	0.086	0.092	0.076	0.08	0.079	0.052	0.101	0.105	0.131	0.147	0.117	0.122	0.132	0.004	0.01
230	Form__295	ACBD3	acbd3.S	gnl|gene11078|XL-9_2-gene11078|rna32205|	300	102.2	AVAGSCSPLNSPS	K.QQEAAVAGSCSPLNSPSK.M	Golgi resident protein GCP60						0.083	0.071	0.029	0.023	0.026	0.021	0.029	0.031	0.032	0.338	0.317	0.088	0.097	0.083	0.083	0.092	0.09	0.098	0.095	0.094	0.087	0.093	0.081	0.076	0.027	0.021	0.026	0.021	0.031	0.033	0.033	0.325	0.326
230	Form__296	ACBD3	acbd3.S	gnl|gene11078|XL-9_2-gene11078|rna32205|	304	44.5	SCSPLNSPSKMLS	K.QQEAAVAGSCSPLNSPSK.M	Golgi resident protein GCP60						0.022	0.033	0.196	0.173	0.125	0.148	0.078	0.096	0.06	0.025	0.043	0.088	0.097	0.083	0.083	0.092	0.09	0.098	0.095	0.094	0.087	0.093	0.022	0.036	0.182	0.161	0.129	0.149	0.086	0.102	0.063	0.024	0.045
230	Form__297	ACBD3	acbd3.S	gnl|gene11078|XL-9_2-gene11078|rna32205|	300;304	102.2	AVAGSCSPLNSPS;SCSPLNSPSKMLS	K.QQEAAVAGSCSPLNSPSK.M	Golgi resident protein GCP60						0.024	0.011	0.114	0.106	0.15	0.136	0.132	0.125	0.183	0.006	0.013	0.088	0.097	0.083	0.083	0.092	0.09	0.098	0.095	0.094	0.087	0.093	0.023	0.012	0.104	0.096	0.151	0.134	0.142	0.13	0.189	0.006	0.013
2106	Form_2577	ACBD5	acbd5.L	gnl|gene2011|XL-9_2-gene2011|rna5846|	137	38.3	GSVLTSTPNGKAV	R.GSGVTSELGSVLTSTPNGK.A	Acyl-CoA-binding domain-containing protein 5	GN:ACBD5|ACBD5|human|Q5T8D3	0	181	GNVLTSTPNAKTV	NaN	0.016	0.017	0.061	0.121	0.107	0.142	0.12	0.149	0.164	0.045	0.057	0.083	0.091	0.092	0.086	0.09	0.094	0.096	0.1	0.097	0.093	0.078	0.014	0.017	0.061	0.112	0.104	0.144	0.124	0.161	0.172	0.045	0.048
2236	Form_2740	ACIN1	acin1.L	gnl|gene2362|XL-9_2-gene2362|rna6874|	401	28.9	SKDIKTSPALVLI	K.TSPALVLIKPPSQGR.S	Apoptotic chromatin condensation inducer in the nucleus						0.017	0.019	0.111	0.15	0.149	0.133	0.1	0.122	0.112	0.036	0.052	0.073	0.063	0.065	0.072	0.081	0.092	0.1	0.106	0.106	0.127	0.114	0.014	0.013	0.08	0.12	0.134	0.136	0.111	0.144	0.132	0.051	0.066
2237	Form_2742	ACIN1	acin1.L	gnl|gene2362|XL-9_2-gene2362|rna6874|	484	49.4	KVTDIESPESEKS	K.VTDIESPESEK.S	Apoptotic chromatin condensation inducer in the nucleus						0.135	0.041	0.2	0.141	0.107	0.106	0.072	0.103	0.085	0.004	0.007	0.073	0.063	0.065	0.072	0.081	0.092	0.1	0.106	0.106	0.127	0.114	0.12	0.031	0.158	0.123	0.105	0.118	0.088	0.132	0.11	0.006	0.009
2238	Form_2741	ACIN1	acin1.L	gnl|gene2362|XL-9_2-gene2362|rna6874|	1647	22.9	AEDTHISEDEAER	K.QEAVVDLHAEDTHISEDEAER.N	Apoptotic chromatin condensation inducer in the nucleus	GN:ACIN1|acinus|human|Q9UKV3	0	898	ADDSRISEDETER	NaN	0.084	0.047	0.067	0.103	0.105	0.113	0.126	0.185	0.158	0.001	0.011	0.073	0.063	0.065	0.072	0.081	0.092	0.1	0.106	0.106	0.127	0.114	0.068	0.033	0.048	0.082	0.094	0.115	0.14	0.217	0.186	0.002	0.014
727	Form__906	ACLY	acly.S	gnl|gene13375|XL-9_2-gene13375|rna38904|	465	86.1	SRTEDITPAKKSK	R.TEDITPAK.K	ATP-citrate synthase						0.001	0.006	0.181	0.121	0.103	0.106	0.129	0.113	0.136	0.043	0.061	0.091	0.087	0.09	0.088	0.092	0.089	0.097	0.096	0.093	0.09	0.088	0.001	0.006	0.178	0.116	0.103	0.103	0.137	0.118	0.138	0.042	0.059
728	Form__905	ACLY	acly.S	gnl|gene13375|XL-9_2-gene13375|rna38904|	523	17.5	DYICSRSEPSVAA	R.SEPSVAALVYPFTGDHK.Q	ATP-citrate synthase						0.08	0.056	0.095	0.067	0.086	0.076	0.156	0.19	0.181	0.002	0.011	0.091	0.087	0.09	0.088	0.092	0.089	0.097	0.096	0.093	0.09	0.088	0.079	0.053	0.092	0.064	0.085	0.073	0.163	0.197	0.182	0.002	0.01
5131	Form_6280	ACO2	aco2.L	gnl|gene9191|XL-9_2-gene9191|rna26702|	561	37.7	SLQVEVSPTSQRL	K.DGNSLQVEVSPTSQR.L	Aconitate hydratase, mitochondrial						0.092	0.056	0.083	0.096	0.104	0.099	0.096	0.095	0.113	0.067	0.099	0.086	0.092	0.091	0.09	0.095	0.096	0.093	0.093	0.091	0.087	0.086	0.087	0.057	0.083	0.095	0.108	0.104	0.098	0.097	0.113	0.064	0.093
4022	Form_4941	ACSBG2	acsbg2.L	gnl|gene48757|XL-9_2-gene48757|rna94493|	740;746	68.4	FYQDAGTPTENFT;TPTENFTPPKxxx	K.DQIDSFYQDAGTPTENFTPPK.-	Long-chain-fatty-acid--CoA ligase ACSBG2						0.016	0.011	0.031	0.042	0.073	0.09	0.111	0.199	0.391	0.009	0.027	0.08	0.082	0.081	0.087	0.091	0.087	0.096	0.094	0.095	0.099	0.108	0.014	0.01	0.027	0.039	0.071	0.084	0.115	0.201	0.399	0.01	0.031
4377	Form_5375	ACSBG2	LOC108705086	gnl|gene5640|XL-9_2-gene5640|rna16519|	23	153.1	QEPLQESAANEKI	R.ATGDIGQEPLQESAANEK.I	Long-chain-fatty-acid--CoA ligase ACSBG2						0.003	0.004	0.08	0.1	0.116	0.174	0.127	0.185	0.194	0.005	0.012	0.097	0.106	0.096	0.102	0.111	0.101	0.084	0.079	0.081	0.067	0.077	0.003	0.005	0.084	0.112	0.141	0.192	0.117	0.16	0.172	0.004	0.01
2066	Form_2526	ACTA1	act3.S	gnl|gene19900|XL-9_2-gene19900|rna58110|	54	27.5	GMGQKDSYVGDEA	K.DSYVGDEAQSK.R	Actin, alpha skeletal muscle	GN:ACTA1|ACTA1|human|P68133	0	54	GMGQKDSYVGDEA	NaN	0.027	0.016	0.085	0.072	0.123	0.121	0.139	0.151	0.239	0.008	0.02	0.089	0.101	0.086	0.099	0.09	0.09	0.085	0.081	0.089	0.092	0.096	0.027	0.018	0.083	0.081	0.125	0.123	0.134	0.139	0.241	0.008	0.022
2067	Form_2527	ACTA1	act3.S	gnl|gene19900|XL-9_2-gene19900|rna58110|	241	41.3	SSSLEKSYELPDG	K.SYELPDGQVITIGNER.F	Actin, alpha skeletal muscle	GN:ACTA1|ACTA1|human|P68133	0	241	SSSLEKSYELPDG	NaN	0.123	0.059	0.121	0.075	0.131	0.095	0.107	0.097	0.145	0.014	0.034	0.089	0.101	0.086	0.099	0.09	0.09	0.085	0.081	0.089	0.092	0.096	0.122	0.067	0.116	0.083	0.132	0.096	0.102	0.088	0.144	0.014	0.036
1519	Form_1863	ACTR2	actr2.L	gnl|gene17277|XL-9_2-gene17277|rna50418|	117	152.4	EPPMNPTKNREKI	K.ILLTEPPMNPTK.N	Actin-related protein 2	GN:ACTR2|ARP2|human|P61160	0	117	EPPMNPTKNREKI	NaN	0.098	0.091	0.124	0.099	0.089	0.096	0.087	0.087	0.111	0.041	0.076	0.091	0.093	0.092	0.087	0.094	0.089	0.092	0.095	0.093	0.084	0.09	0.098	0.093	0.125	0.094	0.092	0.094	0.088	0.091	0.113	0.038	0.075
2258	Form_2774	ACTR5	actr5.S	gnl|gene241|XL-9_2-gene241|rna679|	379	61.7	LDSKPQTPEPPGG	K.PQTPEPPGGEQDEMEGISELEPAYNEDQMETEK.A	Actin-related protein 5						0.083	0.059	0.117	0.13	0.153	0.151	0.078	0.068	0.093	0.025	0.044	0.077	0.078	0.072	0.069	0.076	0.085	0.11	0.103	0.09	0.127	0.114	0.075	0.054	0.099	0.106	0.137	0.151	0.101	0.082	0.099	0.038	0.059
1682	Form_2066	ADAM17	adam17.S	gnl|gene18141|XL-9_2-gene18141|rna53003|	822	51.4	SGSPAKSFEDLTD	K.SFEDLTDRPVVR.S	Disintegrin and metalloproteinase domain-containing protein 17	GN:ADAM17|TACE|human|P78536	0	791	SSTAAKSFEDLTD	2	0.064	0.031	0.105	0.096	0.144	0.128	0.131	0.114	0.167	0.005	0.015	0.106	0.086	0.086	0.085	0.098	0.095	0.106	0.095	0.088	0.082	0.073	0.072	0.028	0.096	0.087	0.151	0.13	0.148	0.116	0.157	0.004	0.012
1860	Form_2289	ADAM9	adam9.S	gnl|gene18898|XL-9_2-gene18898|rna55158|	797	27.8	QWPSALSPPRNVP	R.NMPNPAQSQWPSALSPPR.N	ADAM9 protein						0.015	0.027	0.095	0.077	0.107	0.112	0.116	0.157	0.143	0.04	0.111	0.099	0.086	0.097	0.115	0.099	0.103	0.088	0.094	0.087	0.07	0.063	0.016	0.025	0.101	0.097	0.116	0.127	0.112	0.162	0.136	0.031	0.077
4501	Form_5521	ADD1	add1.L	gnl|gene6346|XL-9_2-gene6346|rna18570|	354	31.7	KYKKSRSPEAPSG	K.SRSPEAPSGEGSGLHPK.W	Alpha-adducin						0.088	0.03	0.063	0.063	0.072	0.095	0.148	0.166	0.188	0.043	0.043	0.106	0.079	0.099	0.09	0.07	0.078	0.083	0.097	0.076	0.108	0.114	0.105	0.027	0.071	0.064	0.057	0.084	0.139	0.182	0.162	0.053	0.056
4502	Form_5520	ADD1	add1.L	gnl|gene6346|XL-9_2-gene6346|rna18570|	430	15.4	GGSGTCSPLRHSF	K.YSDVEIPASVTGYSLGNDGGSGTCSPLR.H	Alpha-adducin	GN:ADD1|ADD1|human|P35611	0	431	GDSGTCSPLRHSF	NaN	0.029	0.073	0.111	0.115	0.125	0.105	0.149	0.105	0.118	0.019	0.05	0.106	0.079	0.099	0.09	0.07	0.078	0.083	0.097	0.076	0.108	0.114	0.035	0.067	0.127	0.12	0.101	0.095	0.143	0.118	0.104	0.024	0.066
1161	Form_1440	ADD3	add3.S	gnl|gene15501|XL-9_2-gene15501|rna45256|	679	46.6	DLTPEGSPSKSPS	K.SIEGDLTPEGSPSK.S	Gamma-adducin						0.059	0.033	0.075	0.106	0.114	0.149	0.125	0.194	0.133	0.006	0.008	0.128	0.104	0.118	0.092	0.094	0.072	0.086	0.072	0.078	0.06	0.096	0.087	0.039	0.101	0.112	0.123	0.123	0.123	0.16	0.119	0.004	0.009
1161	Form_1441	ADD3	add3.S	gnl|gene15501|XL-9_2-gene15501|rna45256|	669;675;679	141	VRPSDKSIEGDLT;SIEGDLTPEGSPS;DLTPEGSPSKSPS	K.SIEGDLTPEGSPSK.S	Gamma-adducin						0.024	0.016	0.082	0.147	0.118	0.229	0.095	0.144	0.118	0.017	0.009	0.128	0.104	0.118	0.092	0.094	0.072	0.086	0.072	0.078	0.06	0.096	0.036	0.02	0.114	0.159	0.13	0.193	0.096	0.122	0.108	0.012	0.01
730	Form__910	ADNP	adnp.L	gnl|gene13391|XL-9_2-gene13391|rna38956|	291	5000	QRMGPMSPGNIRT	R.MGPMSPGNIR.T	Activity-dependent neuroprotector homeobox protein						0.131	0.137	0.186	0.154	0.087	0.107	0.056	0.061	0.043	0.009	0.028	0.097	0.09	0.099	0.084	0.095	0.098	0.097	0.089	0.09	0.076	0.085	0.137	0.133	0.198	0.139	0.089	0.113	0.058	0.058	0.042	0.007	0.026
731	Form__908	ADNP	adnp.L	gnl|gene13391|XL-9_2-gene13391|rna38956|	399	70.1	SGNSGLSPGQMKP	R.YSLPSGNSGLSPGQMK.P	Activity-dependent neuroprotector homeobox protein						0.074	0.055	0.213	0.173	0.114	0.101	0.07	0.076	0.074	0.011	0.039	0.097	0.09	0.099	0.084	0.095	0.098	0.097	0.089	0.09	0.076	0.085	0.077	0.053	0.227	0.157	0.117	0.107	0.073	0.073	0.072	0.009	0.036
732	Form__909	ADNP	adnp.L	gnl|gene13391|XL-9_2-gene13391|rna38956|	893	57.2	ESSGEPTPEKNVP	K.LNESSSSDSFNNEDDSNESSGEPTPEK.N	Activity-dependent neuroprotector homeobox protein						0.064	0.06	0.106	0.112	0.122	0.144	0.1	0.131	0.095	0.027	0.039	0.097	0.09	0.099	0.084	0.095	0.098	0.097	0.089	0.09	0.076	0.085	0.067	0.058	0.114	0.102	0.125	0.153	0.105	0.126	0.093	0.022	0.036
3113	Form_3823	ADNP	adnp.S	gnl|gene4002|XL-9_2-gene4002|rna11637|	376	19.9	QRLGTMSPGNIRT	R.LGTMSPGNIR.T	Activity-dependent neuroprotector homeobox protein						0.105	0.119	0.178	0.13	0.071	0.079	0.086	0.073	0.099	0.018	0.042	0.106	0.097	0.109	0.096	0.098	0.095	0.084	0.085	0.085	0.068	0.077	0.117	0.121	0.203	0.131	0.073	0.079	0.076	0.065	0.088	0.013	0.034
3114	Form_3822	ADNP	adnp.S	gnl|gene4002|XL-9_2-gene4002|rna11637|	673	217.6	AQNPNASPVPQKT	R.DAPAESVAYHAQNPNASPVPQK.T	Activity-dependent neuroprotector homeobox protein						0.02	0.023	0.167	0.149	0.107	0.131	0.103	0.105	0.085	0.041	0.071	0.106	0.097	0.109	0.096	0.098	0.095	0.084	0.085	0.085	0.068	0.077	0.023	0.024	0.196	0.154	0.113	0.134	0.093	0.096	0.078	0.03	0.059
3115	Form_3821	ADNP	adnp.S	gnl|gene4002|XL-9_2-gene4002|rna11637|	697	162.8	PAPIKNSPQAAVP	K.NSPQAAVPYK.K	Activity-dependent neuroprotector homeobox protein						0.021	0.025	0.117	0.16	0.096	0.146	0.116	0.139	0.091	0.051	0.038	0.106	0.097	0.109	0.096	0.098	0.095	0.084	0.085	0.085	0.068	0.077	0.024	0.026	0.139	0.167	0.103	0.151	0.106	0.129	0.084	0.038	0.032
1111	Form_1374	ADNP2	adnp2.L	gnl|gene15151|XL-9_2-gene15151|rna44229|	570	110.9	SPAVAPSPPVAKM	K.AMQVSPSPAVAPSPPVAK.M	Activity-dependent neuroprotector homeobox protein 2						0.023	0.015	0.102	0.155	0.106	0.13	0.097	0.103	0.125	0.054	0.089	0.09	0.104	0.111	0.095	0.103	0.109	0.092	0.097	0.069	0.066	0.065	0.023	0.017	0.124	0.161	0.119	0.155	0.097	0.109	0.094	0.039	0.063
387	Form__498	ADRM1	adrm1.S	gnl|gene11779|XL-9_2-gene11779|rna34211|	242	14.7	SQSAAVTPSSTTS	R.SQSAAVTPSSTTSSTR.T	Proteasomal ubiquitin receptor ADRM1						0.005	0.007	0.155	0.185	0.127	0.125	0.095	0.104	0.089	0.033	0.075	0.09	0.096	0.112	0.097	0.086	0.097	0.095	0.09	0.08	0.077	0.08	0.005	0.007	0.185	0.192	0.117	0.13	0.096	0.1	0.076	0.027	0.064
387	Form__499	ADRM1	adrm1.S	gnl|gene11779|XL-9_2-gene11779|rna34211|	236	34.3	SSSSSRSQSAAVT	R.SQSAAVTPSSTTSSTR.T	Proteasomal ubiquitin receptor ADRM1						0.116	0.08	0.128	0.105	0.141	0.108	0.079	0.101	0.119	0.011	0.013	0.09	0.096	0.112	0.097	0.086	0.097	0.095	0.09	0.08	0.077	0.08	0.112	0.082	0.154	0.109	0.13	0.112	0.081	0.098	0.102	0.009	0.011
2644	Form_3260	AFDN	LOC496335	gnl|gene35070|XL-9_2-gene35070|rna74867|	211	52.2	SFTRTISNPEVVM	R.TISNPEVVMK.R	Afadin	GN:MLLT4|Afadin|human|P55196	0	216	SFTRTISNPEVVM	NaN	0.082	0.038	0.115	0.144	0.141	0.125	0.102	0.102	0.128	0.007	0.016	0.086	0.083	0.091	0.086	0.092	0.094	0.097	0.103	0.095	0.09	0.085	0.076	0.034	0.113	0.134	0.14	0.127	0.107	0.114	0.132	0.007	0.015
2645	Form_3253	AFDN	LOC496335	gnl|gene35070|XL-9_2-gene35070|rna74867|	1127	114.1	VANQPQSPGGKTT	R.SSPNVANQPQSPGGK.T	Afadin						0.175	0.112	0.127	0.087	0.093	0.094	0.076	0.082	0.103	0.02	0.032	0.086	0.083	0.091	0.086	0.092	0.094	0.097	0.103	0.095	0.09	0.085	0.166	0.102	0.127	0.082	0.094	0.097	0.081	0.093	0.108	0.02	0.03
2645	Form_3254	AFDN	LOC496335	gnl|gene35070|XL-9_2-gene35070|rna74867|	1118	17.7	RTDHRSSPNVANQ	R.SSPNVANQPQSPGGK.T	Afadin	GN:MLLT4|Afadin|human|P55196	0	1173	RADHRSSPNVANQ	NaN	0.012	0.02	0.112	0.155	0.121	0.192	0.106	0.145	0.104	0.018	0.014	0.086	0.083	0.091	0.086	0.092	0.094	0.097	0.103	0.095	0.09	0.085	0.011	0.018	0.109	0.143	0.119	0.193	0.11	0.16	0.106	0.017	0.013
2645	Form_3257	AFDN	LOC496335	gnl|gene35070|XL-9_2-gene35070|rna74867|	1117	24.2	NRTDHRSSPNVAN	R.SSPNVANQPQSPGGK.T	Afadin						0.188	0.158	0.208	0.102	0.081	0.053	0.049	0.048	0.074	0.02	0.02	0.086	0.083	0.091	0.086	0.092	0.094	0.097	0.103	0.095	0.09	0.085	0.181	0.146	0.211	0.098	0.083	0.056	0.053	0.055	0.078	0.02	0.019
2646	Form_3256	AFDN	LOC496335	gnl|gene35070|XL-9_2-gene35070|rna74867|	1473	54.6	SSSDSLSPDPWKR	K.EELSSSDSLSPDPWK.R	Afadin	GN:MLLT4|Afadin|human|P55196	0	1512	SSGDSLSPDPWKR	NaN	0.049	0.059	0.147	0.142	0.118	0.133	0.099	0.103	0.105	0.021	0.025	0.086	0.083	0.091	0.086	0.092	0.094	0.097	0.103	0.095	0.09	0.085	0.046	0.053	0.145	0.132	0.118	0.135	0.104	0.115	0.108	0.02	0.023
2647	Form_3259	AFDN	LOC496335	gnl|gene35070|XL-9_2-gene35070|rna74867|	1534	5000	QKRLQESQQKDDD	K.RLQESQQK.D	Afadin	GN:MLLT4|Afadin|human|P55196	0	1573	QKRLQESKQKDED	NaN	0.019	0.018	0.082	0.057	0.14	0.133	0.166	0.156	0.216	0.002	0.01	0.086	0.083	0.091	0.086	0.092	0.094	0.097	0.103	0.095	0.09	0.085	0.017	0.016	0.079	0.052	0.136	0.132	0.17	0.169	0.217	0.002	0.009
2648	Form_3255	AFDN	LOC496335	gnl|gene35070|XL-9_2-gene35070|rna74867|	1662	61.3	LSNPTLSPNPPPP	R.EYELSNPTLSPNPPPPPPQR.N	Afadin						0.008	0.014	0.133	0.188	0.16	0.176	0.102	0.087	0.088	0.016	0.028	0.086	0.083	0.091	0.086	0.092	0.094	0.097	0.103	0.095	0.09	0.085	0.007	0.013	0.131	0.175	0.159	0.179	0.107	0.097	0.09	0.016	0.026
2649	Form_3258	AFDN	LOC496335	gnl|gene35070|XL-9_2-gene35070|rna74867|	1716	15.6	YSSMRKSYGDLPP	K.SYGDLPPAAHK.P	Afadin						0.115	0.078	0.187	0.161	0.112	0.097	0.077	0.065	0.083	0.008	0.017	0.086	0.083	0.091	0.086	0.092	0.094	0.097	0.103	0.095	0.09	0.085	0.109	0.071	0.187	0.153	0.114	0.1	0.082	0.074	0.087	0.008	0.016
2992	Form_3676	AFDN	mllt4.L	gnl|gene38725|XL-9_2-gene38725|rna79999|	1079	114.1	VANQPQSPGGKTT	R.SSPNVANQPQSPGGK.T	Afadin	GN:MLLT4|Afadin|human|P55196	0	1182	VANQPPSPGGKSA	NaN	0.157	0.19	0.094	0.092	0.138	0.157	0.066	0.043	0.043	0.007	0.012	0.065	0.033	0.083	0.055	0.042	0.038	0.075	0.133	0.154	0.172	0.148	0.166	0.102	0.127	0.082	0.094	0.097	0.081	0.093	0.108	0.02	0.03
690	Form__862	AFTPH	aftph.S	gnl|gene13213|XL-9_2-gene13213|rna38452|	269	138.5	SSVENGSPQIKDV	R.SPLSSVENGSPQIK.D	Aftiphilin (Fragment)						0.01	0.007	0.088	0.119	0.123	0.137	0.134	0.172	0.195	0.005	0.01	0.087	0.092	0.098	0.088	0.099	0.097	0.101	0.088	0.083	0.085	0.082	0.009	0.007	0.094	0.114	0.132	0.144	0.147	0.164	0.176	0.005	0.009
963	Form_1184	AFTPH	aftph.L	gnl|gene14499|XL-9_2-gene14499|rna42213|	492	138.2	DDESKNSQDFDDF	K.NSQDFDDFADFNSASNFK.P	Aftiphilin (Fragment)						0.077	0.046	0.083	0.077	0.113	0.126	0.148	0.163	0.146	0.011	0.011	0.081	0.087	0.077	0.082	0.101	0.097	0.093	0.101	0.109	0.096	0.077	0.066	0.042	0.068	0.067	0.121	0.129	0.146	0.174	0.168	0.011	0.009
779	Form__962	AGAP1	agap1.L	gnl|gene13571|XL-9_2-gene13571|rna39500|	837	5000	KLDPPPSPHANRK	K.LDPPPSPHANR.K	Arf-GAP with GTPase, ANK repeat and PH domain-containing protein 1	GN:AGAP1|CENTG2|human|Q9UPQ3	0	521	KLDPPPSPHANRK	NaN	0.101	0.064	0.115	0.08	0.089	0.098	0.118	0.098	0.109	0.047	0.08	0.08	0.097	0.088	0.107	0.099	0.098	0.077	0.097	0.088	0.09	0.08	0.09	0.069	0.112	0.095	0.098	0.107	0.101	0.105	0.106	0.047	0.071
4195	Form_5149	AGAP3	LOC108719636	gnl|gene50450|XL-9_2-gene50450|rna96957|	787	40.9	LPARLGSQSDTVA	R.LGSQSDTVAIQSIR.S	Arf-GAP with GTPase, ANK repeat and PH domain-containing protein 3						0.021	0.068	0.156	0.151	0.147	0.146	0.109	0.077	0.112	0.002	0.011	0.087	0.074	0.076	0.073	0.089	0.084	0.099	0.116	0.095	0.106	0.102	0.021	0.058	0.137	0.127	0.151	0.141	0.124	0.103	0.123	0.002	0.013
799	Form__984	AGBL5	agbl5.L	gnl|gene13647|XL-9_2-gene13647|rna39714|	690	17.5	TNSQQSSPQIKSS	R.SYSNSTASTNSQQSSPQIK.S	Cytosolic carboxypeptidase-like protein 5						0.015	0.018	0.077	0.088	0.104	0.123	0.116	0.129	0.166	0.076	0.089	0.088	0.089	0.08	0.087	0.112	0.094	0.095	0.098	0.087	0.084	0.086	0.014	0.017	0.067	0.083	0.127	0.126	0.12	0.138	0.157	0.069	0.083
2087	Form_2552	AGFG1	agfg1.L	gnl|gene20014|XL-9_2-gene20014|rna58420|	177;181	105.4	LQLNKGTPSQSPV;KGTPSQSPVVTRN	K.GTPSQSPVVTR.N	Arf-GAP domain and FG repeat-containing protein 1						0.023	0.034	0.238	0.191	0.098	0.126	0.098	0.095	0.081	0.008	0.01	0.093	0.096	0.105	0.104	0.098	0.105	0.082	0.08	0.079	0.077	0.08	0.022	0.034	0.259	0.206	0.1	0.137	0.083	0.079	0.066	0.006	0.008
2087	Form_2553	AGFG1	agfg1.L	gnl|gene20014|XL-9_2-gene20014|rna58420|	181	105.4	KGTPSQSPVVTRN	K.GTPSQSPVVTR.N	Arf-GAP domain and FG repeat-containing protein 1	GN:AGFG1|RIP|human|P52594	0	181	KGTPSQSPVVGRS	NaN	0.039	0.044	0.159	0.111	0.12	0.114	0.12	0.107	0.099	0.022	0.065	0.093	0.096	0.105	0.104	0.098	0.105	0.082	0.08	0.079	0.077	0.08	0.039	0.045	0.18	0.124	0.127	0.129	0.106	0.092	0.084	0.018	0.056
2087	Form_2554	AGFG1	agfg1.L	gnl|gene20014|XL-9_2-gene20014|rna58420|	177	32.5	LQLNKGTPSQSPV	K.GTPSQSPVVTR.N	Arf-GAP domain and FG repeat-containing protein 1	GN:AGFG1|RIP|human|P52594	0	177	LHLNKGTPSQSPV	NaN	0.064	0.056	0.138	0.08	0.112	0.082	0.093	0.085	0.158	0.037	0.095	0.093	0.096	0.105	0.104	0.098	0.105	0.082	0.08	0.079	0.077	0.08	0.065	0.059	0.159	0.091	0.121	0.095	0.084	0.075	0.137	0.031	0.083
2088	Form_2555	AGFG1	agfg1.L	gnl|gene20014|XL-9_2-gene20014|rna58420|	341	5000	PALKRISQPAADK	K.RISQPAADK.Y	Arf-GAP domain and FG repeat-containing protein 1						0.11	0.029	0.106	0.083	0.09	0.094	0.117	0.128	0.145	0.045	0.053	0.093	0.096	0.105	0.104	0.098	0.105	0.082	0.08	0.079	0.077	0.08	0.113	0.031	0.123	0.095	0.098	0.109	0.106	0.113	0.127	0.038	0.047
4851	Form_5942	AGGF1	aggf1.S	gnl|gene7966|XL-9_2-gene7966|rna23230|	556	40.3	AKYGLQSADYEDN	K.YGLQSADYEDNK.V	Angiogenic factor with G patch and FHA domains 1						0.023	0.015	0.124	0.087	0.138	0.134	0.107	0.126	0.212	0.018	0.017	0.086	0.092	0.08	0.091	0.088	0.095	0.106	0.106	0.091	0.068	0.097	0.021	0.015	0.107	0.085	0.131	0.137	0.122	0.144	0.208	0.013	0.018
2349	Form_2895	AHCTF1	ahctf1.S	gnl|gene26985|XL-9_2-gene26985|rna66490|	1257;1263	150.9	SPVLRSSPDAAWS;SPDAAWSGKGKFA	R.SSPDAAWSGK.G	Protein ELYS						0.01	0.007	0.165	0.129	0.077	0.118	0.122	0.21	0.143	0.007	0.012	0.097	0.092	0.097	0.085	0.092	0.107	0.096	0.088	0.093	0.077	0.077	0.01	0.007	0.172	0.118	0.076	0.135	0.126	0.198	0.143	0.006	0.01
2350	Form_2892	AHCTF1	ahctf1.S	gnl|gene26985|XL-9_2-gene26985|rna66490|	1293;1300	90.5	SGIQTESPDEMEV;PDEMEVSKEASNI	K.IEVNASSSGIQTESPDEMEVSK.E	Protein ELYS						0.033	0.021	0.062	0.086	0.125	0.094	0.157	0.211	0.18	0.017	0.013	0.097	0.092	0.097	0.085	0.092	0.107	0.096	0.088	0.093	0.077	0.077	0.034	0.021	0.065	0.079	0.124	0.108	0.162	0.2	0.18	0.014	0.011
2350	Form_2893	AHCTF1	ahctf1.S	gnl|gene26985|XL-9_2-gene26985|rna66490|	1300	90.5	PDEMEVSKEASNI	K.KIEVNASSSGIQTESPDEMEVSK.E	Protein ELYS						0.02	0.021	0.123	0.167	0.161	0.111	0.105	0.092	0.067	0.054	0.079	0.097	0.092	0.097	0.085	0.092	0.107	0.096	0.088	0.093	0.077	0.077	0.021	0.021	0.131	0.156	0.162	0.13	0.11	0.089	0.068	0.046	0.067
2351	Form_2889	AHCTF1	ahctf1.S	gnl|gene26985|XL-9_2-gene26985|rna66490|	1707;1720	56.1	EKGLQVSPNSDQS;AGVRPVTPRRSIR	K.GLQVSPNSDQSAGVRPVTPR.R	Protein ELYS						0.01	0.009	0.154	0.152	0.104	0.135	0.088	0.1	0.089	0.061	0.099	0.097	0.092	0.097	0.085	0.092	0.107	0.096	0.088	0.093	0.077	0.077	0.011	0.009	0.163	0.141	0.105	0.158	0.092	0.096	0.09	0.051	0.083
2351	Form_2890	AHCTF1	ahctf1.S	gnl|gene26985|XL-9_2-gene26985|rna66490|	1720	56.1	AGVRPVTPRRSIR	K.GLQVSPNSDQSAGVRPVTPR.R	Protein ELYS						0.006	0.011	0.158	0.169	0.11	0.108	0.096	0.103	0.087	0.054	0.098	0.097	0.092	0.097	0.085	0.092	0.107	0.096	0.088	0.093	0.077	0.077	0.006	0.011	0.168	0.158	0.111	0.127	0.101	0.1	0.089	0.046	0.083
2351	Form_2891	AHCTF1	ahctf1.S	gnl|gene26985|XL-9_2-gene26985|rna66490|	1707	17.9	EKGLQVSPNSDQS	K.GLQVSPNSDQSAGVRPVTPR.R	Protein ELYS						0.008	0.014	0.139	0.146	0.114	0.121	0.087	0.114	0.096	0.051	0.11	0.097	0.092	0.097	0.085	0.092	0.107	0.096	0.088	0.093	0.077	0.077	0.009	0.014	0.148	0.136	0.115	0.142	0.092	0.11	0.098	0.043	0.093
2352	Form_2898	AHCTF1	ahctf1.S	gnl|gene26985|XL-9_2-gene26985|rna66490|	1747	15.6	NITLPTTPKRGQK	K.TNDSSAAIIANITLPTTPK.R	Protein ELYS						0.007	0.012	0.053	0.07	0.076	0.052	0.152	0.169	0.161	0.117	0.132	0.097	0.092	0.097	0.085	0.092	0.107	0.096	0.088	0.093	0.077	0.077	0.008	0.012	0.058	0.067	0.079	0.062	0.164	0.167	0.168	0.101	0.114
2353	Form_2897	AHCTF1	ahctf1.S	gnl|gene26985|XL-9_2-gene26985|rna66490|	1938	28.3	QEDITDTPRKRYK	K.MQEDITDTPRK.R	Protein ELYS						0.014	0.024	0.167	0.144	0.128	0.136	0.111	0.133	0.117	0.012	0.013	0.097	0.092	0.097	0.085	0.092	0.107	0.096	0.088	0.093	0.077	0.077	0.015	0.024	0.173	0.131	0.126	0.155	0.114	0.125	0.116	0.01	0.011
2354	Form_2896	AHCTF1	ahctf1.S	gnl|gene26985|XL-9_2-gene26985|rna66490|	2008	33.4	SEQPLRSPESNSK	K.ATLPPVIEDHSEQPLRSPESNSK.V	Protein ELYS						0.068	0.062	0.099	0.11	0.109	0.092	0.083	0.107	0.098	0.059	0.112	0.097	0.092	0.097	0.085	0.092	0.107	0.096	0.088	0.093	0.077	0.077	0.073	0.063	0.106	0.103	0.11	0.109	0.088	0.104	0.1	0.05	0.095
2355	Form_2894	AHCTF1	ahctf1.S	gnl|gene26985|XL-9_2-gene26985|rna66490|	2156;2160	144.2	VEIKLISPPESPA;LISPPESPAVSET	K.LISPPESPAVSETDTK.K	Protein ELYS	GN:AHCTF1|ELYS|human|Q8WYP5	0	2222	IEIRLISPLASPA	NaN	0.034	0.051	0.144	0.087	0.107	0.059	0.066	0.076	0.232	0.026	0.12	0.097	0.092	0.097	0.085	0.092	0.107	0.096	0.088	0.093	0.077	0.077	0.036	0.051	0.153	0.081	0.108	0.069	0.069	0.073	0.237	0.022	0.101
2487	Form_3070	AHCTF1	ahctf1.L	gnl|gene324|XL-9_2-gene324|rna932|	1211;1215	47	RTTPLVSPSVSPG;LVSPSVSPGRSLT	R.TTPLVSPSVSPGR.S	Protein ELYS	GN:AHCTF1|ELYS|human|Q8WYP5	0	1214	RSTPLASPSPSPG	NaN	0.045	0.066	0.161	0.185	0.131	0.139	0.09	0.093	0.078	0.004	0.009	0.093	0.09	0.083	0.085	0.096	0.095	0.092	0.094	0.092	0.091	0.09	0.046	0.066	0.148	0.174	0.139	0.146	0.092	0.097	0.08	0.004	0.009
2487	Form_3072	AHCTF1	ahctf1.L	gnl|gene324|XL-9_2-gene324|rna932|	1215	47	LVSPSVSPGRSLT	R.TTPLVSPSVSPGR.S	Protein ELYS						0.147	0.116	0.057	0.071	0.104	0.085	0.112	0.114	0.137	0.025	0.032	0.093	0.09	0.083	0.085	0.096	0.095	0.092	0.094	0.092	0.091	0.09	0.149	0.114	0.052	0.066	0.109	0.088	0.112	0.117	0.137	0.025	0.031
2488	Form_3074	AHCTF1	ahctf1.L	gnl|gene324|XL-9_2-gene324|rna932|	1248;1256	231.9	AKAAHSSEGNLLA;GNLLAISPVLRSS	K.AAHSSEGNLLAISPVLR.S	Protein ELYS						0.04	0.043	0.151	0.145	0.116	0.113	0.125	0.119	0.118	0.008	0.021	0.093	0.09	0.083	0.085	0.096	0.095	0.092	0.094	0.092	0.091	0.09	0.041	0.043	0.138	0.136	0.123	0.119	0.127	0.124	0.12	0.008	0.021
2489	Form_3077	AHCTF1	ahctf1.L	gnl|gene324|XL-9_2-gene324|rna932|	1262	28.4	SPVLRSSPDAVWS	R.SSPDAVWSVK.G	Protein ELYS						0.044	0.022	0.172	0.146	0.131	0.129	0.118	0.113	0.114	0.003	0.009	0.093	0.09	0.083	0.085	0.096	0.095	0.092	0.094	0.092	0.091	0.09	0.045	0.022	0.158	0.137	0.139	0.135	0.12	0.117	0.116	0.003	0.009
2490	Form_3076	AHCTF1	ahctf1.L	gnl|gene324|XL-9_2-gene324|rna932|	1299;1306	120.8	SGIQEESQDEMEV;QDEMEVSKEISNI	K.KLDEIDASSSGIQEESQDEMEVSK.E	Protein ELYS						0.04	0.047	0.099	0.149	0.149	0.17	0.097	0.135	0.101	0.004	0.007	0.093	0.09	0.083	0.085	0.096	0.095	0.092	0.094	0.092	0.091	0.09	0.041	0.046	0.09	0.139	0.157	0.177	0.098	0.139	0.102	0.004	0.007
2491	Form_3071	AHCTF1	ahctf1.L	gnl|gene324|XL-9_2-gene324|rna932|	1711	248.9	INEGQVSPNRDQS	K.TEQINEGQVSPNR.D	Protein ELYS						0.066	0.053	0.11	0.124	0.105	0.132	0.087	0.115	0.089	0.054	0.065	0.093	0.09	0.083	0.085	0.096	0.095	0.092	0.094	0.092	0.091	0.09	0.067	0.052	0.1	0.116	0.111	0.138	0.088	0.119	0.09	0.054	0.064
2492	Form_3080	AHCTF1	ahctf1.L	gnl|gene324|XL-9_2-gene324|rna932|	1809	174.5	QIKEPPSGEDLQV	K.EPPSGEDLQVQPSTPTR.G	Protein ELYS						0.022	0.015	0.13	0.118	0.109	0.142	0.106	0.15	0.19	0.005	0.013	0.093	0.09	0.083	0.085	0.096	0.095	0.092	0.094	0.092	0.091	0.09	0.023	0.015	0.119	0.11	0.115	0.148	0.107	0.155	0.192	0.005	0.013
2493	Form_3078	AHCTF1	ahctf1.L	gnl|gene324|XL-9_2-gene324|rna932|	1897;1908	16.5	SDDIKESPSVEDL;DLQVQPSTPTRGR	R.VITSDDIKESPSVEDLQVQPSTPTR.G	Protein ELYS						0.003	0.007	0.212	0.193	0.096	0.126	0.106	0.133	0.104	0.01	0.009	0.093	0.09	0.083	0.085	0.096	0.095	0.092	0.094	0.092	0.091	0.09	0.003	0.007	0.196	0.183	0.103	0.133	0.109	0.139	0.107	0.01	0.009
2493	Form_3081	AHCTF1	ahctf1.L	gnl|gene324|XL-9_2-gene324|rna932|	1897	15.3	SDDIKESPSVEDL	K.ESPSVEDLQVQPSTPTR.G	Protein ELYS						0.02	0.021	0.189	0.14	0.121	0.109	0.1	0.088	0.15	0.007	0.054	0.093	0.09	0.083	0.085	0.096	0.095	0.092	0.094	0.092	0.091	0.09	0.021	0.021	0.174	0.132	0.129	0.115	0.102	0.092	0.153	0.007	0.054
2494	Form_3075	AHCTF1	ahctf1.L	gnl|gene324|XL-9_2-gene324|rna932|	1959	167.7	DIKEPLSGEDLQV	K.EPLSGEDLQVQPSTPTR.G	Protein ELYS						0.037	0.027	0.162	0.13	0.116	0.141	0.111	0.121	0.142	0.003	0.009	0.093	0.09	0.083	0.085	0.096	0.095	0.092	0.094	0.092	0.091	0.09	0.038	0.027	0.148	0.122	0.123	0.148	0.113	0.125	0.144	0.003	0.009
2495	Form_3082	AHCTF1	ahctf1.L	gnl|gene324|XL-9_2-gene324|rna932|	2101	15.2	HFERNSSQPNIKA	R.NSSQPNIK.A	Protein ELYS						0.064	0.097	0.137	0.101	0.1	0.124	0.112	0.141	0.117	0.002	0.006	0.093	0.09	0.083	0.085	0.096	0.095	0.092	0.094	0.092	0.091	0.09	0.065	0.096	0.125	0.094	0.106	0.129	0.113	0.146	0.118	0.002	0.006
2496	Form_3073	AHCTF1	ahctf1.L	gnl|gene324|XL-9_2-gene324|rna932|	2114	121.3	DTSPPVSPKKVSL	K.ADTSPPVSPK.K	Protein ELYS						0.064	0.084	0.151	0.111	0.114	0.119	0.105	0.114	0.122	0.005	0.01	0.093	0.09	0.083	0.085	0.096	0.095	0.092	0.094	0.092	0.091	0.09	0.066	0.083	0.138	0.104	0.121	0.125	0.106	0.118	0.124	0.005	0.01
2496	Form_3083	AHCTF1	ahctf1.L	gnl|gene324|XL-9_2-gene324|rna932|	2110;2114	121.3	NIKADTSPPVSPK;DTSPPVSPKKVSL	K.ADTSPPVSPK.K	Protein ELYS						0.07	0.089	0.154	0.108	0.114	0.123	0.108	0.114	0.106	0.005	0.008	0.093	0.09	0.083	0.085	0.096	0.095	0.092	0.094	0.092	0.091	0.09	0.072	0.088	0.141	0.101	0.121	0.129	0.11	0.118	0.108	0.005	0.008
2497	Form_3079	AHCTF1	ahctf1.L	gnl|gene324|XL-9_2-gene324|rna932|	2353	28	RVLKKPSWSTPPV	K.KPSWSTPPVEIK.L	Protein ELYS						0.004	0.013	0.141	0.16	0.134	0.167	0.103	0.118	0.146	0.006	0.008	0.093	0.09	0.083	0.085	0.096	0.095	0.092	0.094	0.092	0.091	0.09	0.004	0.013	0.129	0.15	0.141	0.174	0.104	0.122	0.148	0.006	0.008
2498	Form_3084	AHCTF1	ahctf1.L	gnl|gene324|XL-9_2-gene324|rna932|	2365;2369	117.5	VEIKLISPPESPA;LISPPESPAVSET	K.LISPPESPAVSETNTK.T	Protein ELYS						0.024	0.017	0.14	0.133	0.097	0.129	0.117	0.169	0.15	0.008	0.016	0.093	0.09	0.083	0.085	0.096	0.095	0.092	0.094	0.092	0.091	0.09	0.025	0.017	0.128	0.124	0.102	0.135	0.118	0.175	0.152	0.008	0.016
5158	Form_6316	AHCYL2	ahcyl2.L	gnl|gene9310|XL-9_2-gene9310|rna27052|	85;96	65.2	GGDDAGSPEGAVS;VSEAPRTVKKQIQ	K.DGGDDAGSPEGAVSEAPRTVKK.Q	Adenosylhomocysteinase 3 (Fragment)	GN:AHCYL2|AHCYL2|human|Q96HN2	0	118	VTEAPRTVKKQIQ	NaN	0.008	0.002	0.052	0.036	0.072	0.183	0.181	0.296	0.138	0.012	0.018	0.083	0.111	0.091	0.143	0.084	0.078	0.079	0.064	0.127	0.069	0.069	0.008	0.003	0.056	0.062	0.072	0.17	0.17	0.225	0.209	0.01	0.015
245	Form__335	AHNAK	ahnak.L	gnl|gene11108|XL-9_2-gene11108|rna32278|	42	5000	KQLVQDSPAAKTG	K.QLVQDSPAAK.T	Neuroblast differentiation-associated protein AHNAK						0.005	0.013	0.169	0.156	0.154	0.162	0.122	0.121	0.089	0.004	0.006	0.096	0.074	0.103	0.089	0.083	0.086	0.101	0.094	0.103	0.095	0.075	0.005	0.01	0.187	0.149	0.137	0.149	0.132	0.122	0.098	0.004	0.005
246	Form__329	AHNAK	ahnak.L	gnl|gene11108|XL-9_2-gene11108|rna32278|	260	35	SISSKDSPSFSGP	K.DSPSFSGPK.Y	Neuroblast differentiation-associated protein AHNAK						0.007	0.012	0.11	0.199	0.157	0.203	0.109	0.133	0.061	0.005	0.004	0.096	0.074	0.103	0.089	0.083	0.086	0.101	0.094	0.103	0.095	0.075	0.007	0.01	0.124	0.193	0.142	0.191	0.12	0.137	0.069	0.005	0.003
247	Form__334	AHNAK	ahnak.L	gnl|gene11108|XL-9_2-gene11108|rna32278|	399	5000	VYRRELSGDQMVK	R.ELSGDQMVK.S	Neuroblast differentiation-associated protein AHNAK						0.319	0.081	0.191	0.157	0.055	0.054	0.031	0.05	0.054	0.001	0.006	0.096	0.074	0.103	0.089	0.083	0.086	0.101	0.094	0.103	0.095	0.075	0.328	0.064	0.21	0.149	0.049	0.05	0.034	0.05	0.06	0.001	0.005
248	Form__332	AHNAK	ahnak.L	gnl|gene11108|XL-9_2-gene11108|rna32278|	459	61.8	TAINVASPDIQAA	K.LQGPATAINVASPDIQAATLQIDGK.I	Neuroblast differentiation-associated protein AHNAK						0.012	0.009	0.045	0.091	0.113	0.131	0.177	0.166	0.123	0.043	0.09	0.096	0.074	0.103	0.089	0.083	0.086	0.101	0.094	0.103	0.095	0.075	0.013	0.007	0.05	0.088	0.102	0.122	0.194	0.169	0.137	0.044	0.073
249	Form__327	AHNAK	ahnak.L	gnl|gene11108|XL-9_2-gene11108|rna32278|	2217;2224	200.6	PKVELDSPTLDIE;PTLDIESPEGKGK	K.VELDSPTLDIESPEGK.G	Neuroblast differentiation-associated protein AHNAK						0.008	0.014	0.068	0.08	0.132	0.162	0.184	0.172	0.162	0.007	0.011	0.096	0.074	0.103	0.089	0.083	0.086	0.101	0.094	0.103	0.095	0.075	0.008	0.011	0.075	0.076	0.117	0.149	0.198	0.173	0.178	0.007	0.009
249	Form__331	AHNAK	ahnak.L	gnl|gene11108|XL-9_2-gene11108|rna32278|	2224	200.6	PTLDIESPEGKGK	K.VELDSPTLDIESPEGK.G	Neuroblast differentiation-associated protein AHNAK						0.011	0.017	0.067	0.083	0.134	0.137	0.213	0.149	0.175	0.008	0.008	0.096	0.074	0.103	0.089	0.083	0.086	0.101	0.094	0.103	0.095	0.075	0.011	0.013	0.073	0.078	0.118	0.125	0.229	0.149	0.191	0.008	0.006
249	Form__333	AHNAK	ahnak.L	gnl|gene11108|XL-9_2-gene11108|rna32278|	2217	39.4	PKVELDSPTLDIE	K.VELDSPTLDIESPEGK.G	Neuroblast differentiation-associated protein AHNAK						0.134	0.069	0.119	0.103	0.068	0.074	0.121	0.133	0.169	0.001	0.01	0.096	0.074	0.103	0.089	0.083	0.086	0.101	0.094	0.103	0.095	0.075	0.136	0.054	0.13	0.097	0.06	0.067	0.13	0.132	0.184	0.001	0.008
250	Form__330	AHNAK	ahnak.L	gnl|gene11108|XL-9_2-gene11108|rna32278|	3453	5000	PEVDLKTPDVDIH	K.TPDVDIHGK.V	Neuroblast differentiation-associated protein AHNAK						0.186	0.105	0.22	0.193	0.057	0.078	0.051	0.043	0.039	0.007	0.021	0.096	0.074	0.103	0.089	0.083	0.086	0.101	0.094	0.103	0.095	0.075	0.193	0.084	0.245	0.186	0.051	0.073	0.056	0.044	0.044	0.007	0.017
251	Form__328	AHNAK	ahnak.L	gnl|gene11108|XL-9_2-gene11108|rna32278|	4703	31.6	LPGVSGSGSKGDL	K.GEYSLPGVSGSGSK.G	Neuroblast differentiation-associated protein AHNAK						0.009	0.009	0.124	0.128	0.108	0.184	0.12	0.173	0.134	0.002	0.007	0.096	0.074	0.103	0.089	0.083	0.086	0.101	0.094	0.103	0.095	0.075	0.009	0.007	0.137	0.122	0.096	0.169	0.13	0.174	0.148	0.002	0.006
252	Form__336	AHNAK	ahnak.L	gnl|gene11108|XL-9_2-gene11108|rna32278|	4817	36.8	SYEVTLSDDENIQ	K.GSYEVTLSDDENIQGSGASLSSR.K	Neuroblast differentiation-associated protein AHNAK						0.075	0.068	0.072	0.089	0.111	0.077	0.12	0.156	0.143	0.018	0.07	0.096	0.074	0.103	0.089	0.083	0.086	0.101	0.094	0.103	0.095	0.075	0.078	0.055	0.081	0.086	0.1	0.072	0.132	0.159	0.16	0.019	0.057
3584	Form_4401	AHNAK	LOC108715141	gnl|gene44374|XL-9_2-gene44374|rna88249|	44	5000	KQLVQDSPAGKTG	K.QLVQDSPAGK.T	Neuroblast differentiation-associated protein AHNAK						0.004	0.013	0.035	0.054	0.182	0.172	0.207	0.154	0.168	0.008	0.004	0.251	0.074	0.225	0.137	0.034	0.041	0.026	0.037	0.031	0.024	0.121	0.019	0.021	0.166	0.158	0.131	0.149	0.114	0.121	0.11	0.004	0.009
3585	Form_4399	AHNAK	LOC108715141	gnl|gene44374|XL-9_2-gene44374|rna88249|	118	46.8	SPDVVLSGDDEEY	K.SPDVVLSGDDEEYRR.I	Neuroblast differentiation-associated protein AHNAK	GN:AHNAK|AHNAK|human|Q09666	0	115	SSEVVLSGDDEEY	NaN	0.049	0.069	0.054	0.079	0.186	0.183	0.18	0.109	0.074	0.014	0.003	0.251	0.074	0.225	0.137	0.034	0.041	0.026	0.037	0.031	0.024	0.121	0.187	0.078	0.183	0.165	0.096	0.114	0.071	0.061	0.035	0.005	0.005
3586	Form_4400	AHNAK	LOC108715141	gnl|gene44374|XL-9_2-gene44374|rna88249|	304	22.2	QKGHLRSPQDSSI	K.GHLRSPQDSSIDIQMK.G	Neuroblast differentiation-associated protein AHNAK						0.026	0.033	0.028	0.041	0.17	0.115	0.182	0.107	0.136	0.092	0.071	0.251	0.074	0.225	0.137	0.034	0.041	0.026	0.037	0.031	0.024	0.121	0.119	0.044	0.113	0.103	0.105	0.086	0.086	0.072	0.077	0.04	0.156
4324	Form_5307	AK2	ak2.S	gnl|gene5291|XL-9_2-gene5291|rna15490|	153	35.3	HASSGRSYHEEFN	R.SYHEEFNPPK.E	Adenylate kinase 2, mitochondrial	GN:AK2|AK2|human|P54819	0	151	HPKSGRSYHEEFN	NaN	0.076	0.046	0.116	0.132	0.16	0.123	0.102	0.088	0.137	0.007	0.012	0.084	0.088	0.088	0.08	0.079	0.081	0.106	0.108	0.1	0.092	0.095	0.071	0.045	0.114	0.118	0.141	0.111	0.121	0.106	0.153	0.007	0.013
4325	Form_5306	AK2	ak2.S	gnl|gene5291|XL-9_2-gene5291|rna15490|	178	95	EALIRRSDDNEST	R.RSDDNESTLK.S	Adenylate kinase 2, mitochondrial	GN:AK2|AK2|human|P54819	0	176	EPLIRRSDDNEKA	NaN	0.093	0.066	0.128	0.117	0.133	0.131	0.082	0.078	0.095	0.028	0.049	0.084	0.088	0.088	0.08	0.079	0.081	0.106	0.108	0.1	0.092	0.095	0.088	0.065	0.126	0.105	0.118	0.119	0.097	0.094	0.107	0.029	0.052
4241	Form_5204	AKAP1	LOC108708368	gnl|gene50973|XL-9_2-gene50973|rna97696|	449	149.2	DVVADNSKGNAKQ	K.AETFVASDDVVADNSK.G	A-kinase anchor protein 1, mitochondrial						0.008	0.003	0.067	0.122	0.205	0.13	0.15	0.162	0.142	0.007	0.003	0.155	0.143	0.142	0.114	0.085	0.072	0.064	0.048	0.044	0.044	0.089	0.017	0.006	0.124	0.183	0.228	0.123	0.126	0.102	0.082	0.004	0.004
4242	Form_5205	AKAP1	LOC108708368	gnl|gene50973|XL-9_2-gene50973|rna97696|	677	29.3	VETKNLSYSNGDL	K.NLSYSNGDLK.R	A-kinase anchor protein 1, mitochondrial						0.005	0.005	0.135	0.144	0.147	0.146	0.108	0.137	0.159	0.009	0.005	0.155	0.143	0.142	0.114	0.085	0.072	0.064	0.048	0.044	0.044	0.089	0.009	0.009	0.236	0.202	0.153	0.129	0.085	0.081	0.086	0.005	0.005
4242	Form_5206	AKAP1	LOC108708368	gnl|gene50973|XL-9_2-gene50973|rna97696|	679	22.1	TKNLSYSNGDLKR	K.NLSYSNGDLK.R	A-kinase anchor protein 1, mitochondrial						0.008	0.006	0.094	0.138	0.197	0.154	0.138	0.132	0.126	0.005	0.004	0.155	0.143	0.142	0.114	0.085	0.072	0.064	0.048	0.044	0.044	0.089	0.016	0.01	0.166	0.196	0.209	0.138	0.11	0.079	0.069	0.003	0.004
308	Form__403	AKAP12	akap12.S	gnl|gene11524|XL-9_2-gene11524|rna33468|	138	37.4	LESPEESPDQTNE	K.EQGQDEAPEATNATLESPEESPDQTNETQSSEVGFK.K	A-kinase anchor protein 12						0.035	0.013	0.043	0.049	0.11	0.126	0.123	0.159	0.229	0.075	0.039	0.215	0.084	0.177	0.129	0.057	0.057	0.053	0.05	0.037	0.037	0.104	0.115	0.016	0.116	0.097	0.095	0.109	0.099	0.121	0.129	0.042	0.061
309	Form__404	AKAP12	akap12.S	gnl|gene11524|XL-9_2-gene11524|rna33468|	255	24.2	QVKTPESPTNPLV	K.TPESPTNPLVVETSSPLK.K	A-kinase anchor protein 12						0.033	0.037	0.059	0.073	0.139	0.139	0.136	0.162	0.2	0.015	0.008	0.215	0.084	0.177	0.129	0.057	0.057	0.053	0.05	0.037	0.037	0.104	0.101	0.044	0.15	0.135	0.113	0.113	0.103	0.116	0.106	0.008	0.012
310	Form__402	AKAP12	akap12.S	gnl|gene11524|XL-9_2-gene11524|rna33468|	782	29.4	NNEQPTSDGETGK	K.TEETSVVSNNEQPTSDGETGK.E	A-kinase anchor protein 12						0.066	0.043	0.091	0.095	0.143	0.136	0.125	0.134	0.155	0.009	0.003	0.215	0.084	0.177	0.129	0.057	0.057	0.053	0.05	0.037	0.037	0.104	0.173	0.044	0.197	0.15	0.1	0.095	0.081	0.082	0.07	0.004	0.004
5022	Form_6146	AKAP8L	akap8l.L	gnl|gene8731|XL-9_2-gene8731|rna25416|	173	41.8	TEDEGPSPDKKGK	R.ATEDEGPSPDKK.G	A-kinase anchor protein 8-like						0.029	0.031	0.091	0.078	0.116	0.118	0.121	0.164	0.077	0.098	0.075	0.088	0.091	0.085	0.125	0.086	0.103	0.081	0.076	0.127	0.062	0.076	0.029	0.032	0.087	0.11	0.112	0.136	0.11	0.14	0.11	0.068	0.064
5023	Form_6147	AKAP8L	akap8l.L	gnl|gene8731|XL-9_2-gene8731|rna25416|	192	115.6	DVEEAESDGDGAN	K.LATSTEDVEEAESDGDGANVESAK.G	A-kinase anchor protein 8-like						0.134	0.084	0.141	0.088	0.128	0.109	0.11	0.126	0.069	0.006	0.006	0.088	0.091	0.085	0.125	0.086	0.103	0.081	0.076	0.127	0.062	0.076	0.127	0.082	0.129	0.118	0.119	0.121	0.096	0.103	0.095	0.004	0.005
3666	Form_4509	AKIRIN2	LOC108716879	gnl|gene45119|XL-9_2-gene45119|rna89349|	18;22	188.6	EFDPLLSPAASPK;LLSPAASPKRRRC	R.TIEFDPLLSPAASPK.R	Akirin-2						0.043	0.059	0.1	0.137	0.097	0.156	0.125	0.159	0.103	0.005	0.016	0.071	0.075	0.084	0.093	0.111	0.098	0.089	0.101	0.119	0.092	0.067	0.032	0.046	0.088	0.133	0.112	0.16	0.116	0.168	0.128	0.005	0.011
3667	Form_4506	AKIRIN2	LOC108716879	gnl|gene45119|XL-9_2-gene45119|rna89349|	32	59.7	RRCAPLSPPGPSP	R.CAPLSPPGPSPSK.Y	Akirin-2						0.042	0.038	0.125	0.101	0.104	0.128	0.142	0.128	0.118	0.032	0.041	0.071	0.075	0.084	0.093	0.111	0.098	0.089	0.101	0.119	0.092	0.067	0.031	0.03	0.11	0.099	0.121	0.132	0.133	0.136	0.148	0.031	0.029
3667	Form_4508	AKIRIN2	LOC108716879	gnl|gene45119|XL-9_2-gene45119|rna89349|	37	39.7	LSPPGPSPSKYLR	R.CAPLSPPGPSPSK.Y	Akirin-2						0.056	0.054	0.113	0.113	0.106	0.134	0.122	0.125	0.101	0.033	0.044	0.071	0.075	0.084	0.093	0.111	0.098	0.089	0.101	0.119	0.092	0.067	0.042	0.043	0.101	0.112	0.125	0.139	0.115	0.134	0.127	0.032	0.031
3668	Form_4507	AKIRIN2	LOC108716879	gnl|gene45119|XL-9_2-gene45119|rna89349|	47;53	5000	YLRMEPSPFGEVS;SPFGEVSPRLTAG	R.MEPSPFGEVSPR.L	Akirin-2	GN:AKIRIN2|AKIRIN2|human|Q53H80	0	67	YLRMEPSPFGDVS	NaN	0.011	0.013	0.234	0.218	0.097	0.129	0.108	0.11	0.069	0.003	0.009	0.071	0.075	0.084	0.093	0.111	0.098	0.089	0.101	0.119	0.092	0.067	0.008	0.01	0.207	0.214	0.114	0.133	0.101	0.117	0.086	0.003	0.006
3668	Form_4510	AKIRIN2	LOC108716879	gnl|gene45119|XL-9_2-gene45119|rna89349|	53	5000	SPFGEVSPRLTAG	R.MEPSPFGEVSPR.L	Akirin-2						0.029	0.024	0.114	0.124	0.131	0.149	0.139	0.127	0.114	0.006	0.043	0.071	0.075	0.084	0.093	0.111	0.098	0.089	0.101	0.119	0.092	0.067	0.021	0.019	0.099	0.12	0.151	0.151	0.128	0.133	0.141	0.006	0.03
1059	Form_1307	AKR1A1	akr1a1.L	gnl|gene14888|XL-9_2-gene14888|rna43457|	249	84.4	GYSPLGSPDRSWR	R.SHGLVLTGYSPLGSPDR.S	Aldo-keto reductase family 1 member A1	GN:AKR1A1|AKR1A1|human|P14550	0	215	AYSPLGSSDRAWR	NaN	0.092	0.09	0.099	0.104	0.128	0.148	0.099	0.118	0.116	0.002	0.005	0.072	0.076	0.069	0.068	0.073	0.068	0.097	0.088	0.095	0.142	0.153	0.084	0.087	0.087	0.09	0.119	0.128	0.122	0.132	0.14	0.003	0.009
4698	Form_5761	AKT1	akt1.S	gnl|gene7353|XL-9_2-gene7353|rna21461|	127;130	55.8	RSGDSPSDNSGAE;DSPSDNSGAEEME	R.SGDSPSDNSGAEEMEVSHSK.P	RAC-alpha serine/threonine-protein kinase	GN:AKT1|Akt1|human|P31749	0	129	GSPSDNSGAEEME	8	0.178	0.025	0.059	0.077	0.056	0.085	0.155	0.206	0.152	0.002	0.005	0.092	0.092	0.101	0.098	0.091	0.102	0.092	0.091	0.088	0.082	0.068	0.176	0.025	0.064	0.081	0.055	0.093	0.154	0.202	0.144	0.002	0.004
518	Form__656	AKT1S1	akt1s1.S	gnl|gene12365|XL-9_2-gene12365|rna35949|	238	5000	ETSKFPSPDLDRI	K.FPSPDLDR.I	Proline-rich AKT1 substrate 1						0.081	0.059	0.125	0.127	0.1	0.114	0.108	0.099	0.084	0.038	0.064	0.051	0.052	0.062	0.066	0.093	0.105	0.11	0.129	0.135	0.112	0.085	0.046	0.034	0.086	0.093	0.103	0.133	0.131	0.142	0.125	0.047	0.06
519	Form__657	AKT1S1	akt1s1.S	gnl|gene12365|XL-9_2-gene12365|rna35949|	269	85.3	PRPRLNTGDFQTK	R.LNTGDFQTK.Y	Proline-rich AKT1 substrate 1	GN:AKT1S1|PRAS40|human|Q96B36	0	246	PRPRLNTSDFQKL	27	0.103	0.035	0.221	0.173	0.112	0.097	0.086	0.065	0.058	0.016	0.034	0.051	0.052	0.062	0.066	0.093	0.105	0.11	0.129	0.135	0.112	0.085	0.063	0.022	0.165	0.137	0.125	0.123	0.114	0.101	0.095	0.021	0.035
2815	Form_3466	AKT1S1	LOC495075	gnl|gene36828|XL-9_2-gene36828|rna77327|	88;93	15.9	KTNETSSGRQNSY;SSGRQNSYSKSYP	K.TNETSSGRQNSYSK.S	Proline-rich AKT1 substrate 1						0.019	0.009	0.139	0.112	0.087	0.098	0.102	0.167	0.249	0.004	0.015	0.086	0.098	0.071	0.083	0.094	0.11	0.096	0.112	0.076	0.101	0.072	0.018	0.01	0.11	0.104	0.091	0.12	0.11	0.209	0.212	0.004	0.012
2816	Form_3467	AKT1S1	LOC495075	gnl|gene36828|XL-9_2-gene36828|rna77327|	129	5000	QMPDDMSKLEAPD	R.ANPIIQNQMPDDMSK.L	Proline-rich AKT1 substrate 1						0.017	0.009	0.273	0.158	0.131	0.113	0.082	0.083	0.117	0.006	0.011	0.086	0.098	0.071	0.083	0.094	0.11	0.096	0.112	0.076	0.101	0.072	0.017	0.01	0.223	0.151	0.141	0.143	0.09	0.107	0.102	0.007	0.009
2817	Form_3468	AKT1S1	LOC495075	gnl|gene36828|XL-9_2-gene36828|rna77327|	208	41.8	YQQYARSLPVTVP	R.SLPVTVPVWGFK.E	Proline-rich AKT1 substrate 1	GN:AKT1S1|PRAS40|human|Q96B36	0	183	TQQYAKSLPVSVP	5	0.215	0.08	0.242	0.074	0.061	0.04	0.057	0.106	0.111	0.003	0.011	0.086	0.098	0.071	0.083	0.094	0.11	0.096	0.112	0.076	0.101	0.072	0.213	0.091	0.198	0.071	0.066	0.051	0.063	0.137	0.097	0.004	0.009
637	Form__798	AKT2	akt2.L	gnl|gene13026|XL-9_2-gene13026|rna37849|	131	21.9	MEVKYGSPSDVSS	K.YGSPSDVSSAEQMDVAMSK.G	Non-specific serine/threonine protein kinase						0.095	0.053	0.099	0.137	0.11	0.194	0.072	0.101	0.08	0.034	0.026	0.094	0.074	0.101	0.088	0.1	0.078	0.09	0.084	0.111	0.075	0.103	0.099	0.044	0.111	0.134	0.122	0.168	0.072	0.094	0.099	0.028	0.03
4038	Form_4957	ALDH16A1	aldh16a1.L	gnl|gene4886|XL-9_2-gene4886|rna14265|	377	5000	GADVFQSPGPIPK	R.AEGADVFQSPGPIPK.K	Aldehyde dehydrogenase family 16 member A1						0.012	0.013	0.086	0.109	0.12	0.135	0.12	0.145	0.201	0.027	0.033	0.083	0.084	0.085	0.088	0.089	0.085	0.091	0.093	0.091	0.103	0.108	0.011	0.012	0.081	0.106	0.118	0.127	0.121	0.149	0.203	0.031	0.04
3752	Form_4611	ALDH18A1	aldh18a1.L	gnl|gene4586|XL-9_2-gene4586|rna13374|	799	62.8	DFSEQGSKKYLHE	R.GENHVVSDFSEQGSK.K	Delta-1-pyrroline-5-carboxylate synthase	GN:ALDH18A1|ALDH18A1|human|P54886	0	779	DFSEHGSLKYLHE	NaN	0.07	0.051	0.099	0.101	0.098	0.111	0.147	0.135	0.172	0.006	0.011	0.066	0.062	0.071	0.068	0.088	0.086	0.1	0.105	0.1	0.149	0.105	0.053	0.036	0.08	0.078	0.098	0.109	0.168	0.162	0.196	0.01	0.013
1329	Form_1638	ALDOA	aldoa.L	gnl|gene16277|XL-9_2-gene16277|rna47549|	36	24.4	ILAADESTGSIAK	K.GILAADESTGSIAK.R	Fructose-bisphosphate aldolase	GN:ALDOA|ALDOA|human|P04075	0	36	ILAADESTGSIAK	1	0.159	0.054	0.15	0.074	0.135	0.084	0.129	0.082	0.127	0.003	0.004	0.084	0.091	0.094	0.098	0.09	0.096	0.086	0.087	0.091	0.091	0.093	0.148	0.055	0.157	0.08	0.135	0.089	0.123	0.079	0.128	0.003	0.004
1330	Form_1637	ALDOA	aldoa.L	gnl|gene16277|XL-9_2-gene16277|rna47549|	46	32.3	IAKRLSSIGAENT	R.LSSIGAENTEENR.R	Fructose-bisphosphate aldolase	GN:ALDOA|ALDOA|human|P04075	0	46	IAKRLQSIGTENT	NaN	0.025	0.011	0.111	0.097	0.163	0.117	0.152	0.122	0.189	0.002	0.01	0.084	0.091	0.094	0.098	0.09	0.096	0.086	0.087	0.091	0.091	0.093	0.023	0.011	0.115	0.105	0.161	0.124	0.144	0.117	0.189	0.002	0.01
2528	Form_3119	ALDOC	aldoc.L	gnl|gene3368|XL-9_2-gene3368|rna9787|	39	5000	ADESVGSMDKRLG	K.GILAADESVGSMDK.R	Fructose-bisphosphate aldolase C						0.114	0.037	0.04	0.086	0.04	0.116	0.143	0.271	0.135	0.008	0.009	0.09	0.084	0.108	0.088	0.091	0.089	0.096	0.093	0.097	0.08	0.084	0.111	0.034	0.047	0.082	0.039	0.112	0.148	0.272	0.142	0.007	0.008
2528	Form_3120	ALDOC	aldoc.L	gnl|gene3368|XL-9_2-gene3368|rna9787|	36;39	5000	ILAADESVGSMDK;ADESVGSMDKRLG	K.GILAADESVGSMDK.R	Fructose-bisphosphate aldolase C						0.111	0.077	0.113	0.117	0.124	0.132	0.099	0.108	0.106	0.005	0.008	0.09	0.084	0.108	0.088	0.091	0.089	0.096	0.093	0.097	0.08	0.084	0.108	0.07	0.131	0.111	0.122	0.127	0.102	0.108	0.111	0.004	0.007
2529	Form_3121	ALDOC	aldoc.L	gnl|gene3368|XL-9_2-gene3368|rna9787|	352	40.5	SGDGAGSAGQSLY	K.YEHSGDGAGSAGQSLYVANHAY.-	Fructose-bisphosphate aldolase C						0.107	0.061	0.081	0.095	0.109	0.115	0.097	0.12	0.162	0.029	0.025	0.09	0.084	0.108	0.088	0.091	0.089	0.096	0.093	0.097	0.08	0.084	0.104	0.055	0.094	0.09	0.107	0.11	0.1	0.12	0.17	0.025	0.023
4880	Form_5981	ALG13	otud4-like.2.L	gnl|gene8143|XL-9_2-gene8143|rna23711|	200	21	NSASTGSEDASFD	R.NSASTGSEDASFDCSSEQTSK.Q	N-acetylglucosaminyldiphosphodolichol N-acetylglucosaminyltransferase (Fragment)						0.091	0.058	0.044	0.047	0.06	0.059	0.092	0.126	0.109	0.152	0.163	0.105	0.106	0.107	0.111	0.106	0.094	0.086	0.079	0.074	0.058	0.074	0.113	0.073	0.056	0.062	0.075	0.066	0.094	0.118	0.096	0.105	0.143
4881	Form_5980	ALG13	otud4-like.2.L	gnl|gene8143|XL-9_2-gene8143|rna23711|	446	37.4	EIAFYHSPGKRCY	R.HPIIGPEIAFYHSPGK.R	N-acetylglucosaminyldiphosphodolichol N-acetylglucosaminyltransferase (Fragment)						0.02	0.063	0.054	0.079	0.095	0.087	0.193	0.184	0.192	0.02	0.013	0.105	0.106	0.107	0.111	0.106	0.094	0.086	0.079	0.074	0.058	0.074	0.024	0.075	0.065	0.098	0.113	0.092	0.187	0.163	0.16	0.013	0.011
4882	Form_5979	ALG13	otud4-like.2.L	gnl|gene8143|XL-9_2-gene8143|rna23711|	552	101.5	TSPGPISPGKQNM	R.TSPGPISPGK.Q	N-acetylglucosaminyldiphosphodolichol N-acetylglucosaminyltransferase (Fragment)						0.02	0.037	0.158	0.146	0.123	0.16	0.113	0.143	0.092	0.003	0.005	0.105	0.106	0.107	0.111	0.106	0.094	0.086	0.079	0.074	0.058	0.074	0.022	0.041	0.177	0.169	0.136	0.157	0.102	0.118	0.071	0.002	0.004
5134	Form_6285	ALG8	alg8.S	gnl|gene9205|XL-9_2-gene9205|rna26736|	19	38.6	NSSGGNSVSKSKE	K.GGNVGTGNSSGGNSVSK.S	Probable dolichyl pyrophosphate Glc1Man9GlcNAc2 alpha-1,3-glucosyltransferase						0.009	0.01	0.058	0.083	0.105	0.144	0.138	0.207	0.222	0.008	0.016	0.103	0.092	0.106	0.101	0.106	0.1	0.085	0.082	0.087	0.065	0.073	0.01	0.01	0.067	0.092	0.122	0.157	0.128	0.186	0.211	0.006	0.013
5134	Form_6286	ALG8	alg8.S	gnl|gene9205|XL-9_2-gene9205|rna26736|	11	48.3	KGGNVGTGNSSGG	K.GGNVGTGNSSGGNSVSK.S	Probable dolichyl pyrophosphate Glc1Man9GlcNAc2 alpha-1,3-glucosyltransferase						0.006	0.009	0.08	0.086	0.105	0.114	0.113	0.153	0.17	0.089	0.076	0.103	0.092	0.106	0.101	0.106	0.1	0.085	0.082	0.087	0.065	0.073	0.007	0.009	0.095	0.097	0.124	0.128	0.107	0.14	0.165	0.065	0.062
5134	Form_6287	ALG8	alg8.S	gnl|gene9205|XL-9_2-gene9205|rna26736|	15	15.1	VGTGNSSGGNSVS	K.GGNVGTGNSSGGNSVSK.S	Probable dolichyl pyrophosphate Glc1Man9GlcNAc2 alpha-1,3-glucosyltransferase						0.042	0.036	0.072	0.07	0.098	0.131	0.13	0.18	0.224	0.003	0.013	0.103	0.092	0.106	0.101	0.106	0.1	0.085	0.082	0.087	0.065	0.073	0.047	0.036	0.083	0.077	0.112	0.142	0.12	0.16	0.211	0.002	0.01
4059	Form_4984	ALKBH5	LOC108702322	gnl|gene49219|XL-9_2-gene49219|rna95108|	341	84.1	TGEDEGSPVRKVK	R.SHDYVDTYTETGEDEGSPVRK.V	RNA demethylase ALKBH5						0.165	0.081	0.135	0.179	0.113	0.108	0.061	0.068	0.083	0.002	0.006	0.081	0.095	0.075	0.06	0.098	0.093	0.125	0.097	0.085	0.105	0.085	0.157	0.091	0.119	0.126	0.13	0.118	0.09	0.077	0.083	0.002	0.006
3087	Form_3791	AMDHD2	LOC108701618	gnl|gene39732|XL-9_2-gene39732|rna81442|	6	64	xMPSNKSVSDAPI	K.SVSDAPIAQFR.N	N-acetylglucosamine-6-phosphate deacetylase						0.007	0.004	0.089	0.141	0.169	0.215	0.104	0.135	0.129	0.002	0.006	0.086	0.079	0.075	0.063	0.073	0.063	0.122	0.099	0.117	0.113	0.11	0.007	0.004	0.079	0.105	0.146	0.161	0.15	0.158	0.179	0.003	0.008
1071	Form_1326	ANAPC2	anapc2.L	gnl|gene14966|XL-9_2-gene14966|rna43675|	720;726	155.9	KVVLIDSDEEGDS;SDEEGDSAMASQA	K.VVLIDSDEEGDSAMASQADQK.E	Anaphase-promoting complex subunit 2	GN:ANAPC2|APC2|human|Q9UJX6	0	738	SDDESDSGMASQA	NaN	0.012	0.011	0.104	0.119	0.13	0.136	0.147	0.157	0.153	0.011	0.019	0.094	0.092	0.1	0.101	0.1	0.103	0.087	0.086	0.086	0.075	0.077	0.012	0.011	0.111	0.129	0.139	0.15	0.137	0.145	0.141	0.009	0.016
1071	Form_1327	ANAPC2	anapc2.L	gnl|gene14966|XL-9_2-gene14966|rna43675|	720;730	155.9	KVVLIDSDEEGDS;GDSAMASQADQKE	K.VVLIDSDEEGDSAMASQADQK.E	Anaphase-promoting complex subunit 2	GN:ANAPC2|APC2|human|Q9UJX6	0	742	SDSGMASQADQKE	NaN	0.043	0.041	0.104	0.088	0.126	0.119	0.152	0.123	0.132	0.036	0.037	0.094	0.092	0.1	0.101	0.1	0.103	0.087	0.086	0.086	0.075	0.077	0.044	0.041	0.112	0.096	0.136	0.132	0.143	0.114	0.123	0.029	0.031
1071	Form_1328	ANAPC2	anapc2.L	gnl|gene14966|XL-9_2-gene14966|rna43675|	720	155.9	KVVLIDSDEEGDS	K.VVLIDSDEEGDSAMASQADQK.E	Anaphase-promoting complex subunit 2						0.262	0.148	0.127	0.079	0.091	0.071	0.073	0.065	0.077	0.004	0.005	0.094	0.092	0.1	0.101	0.1	0.103	0.087	0.086	0.086	0.075	0.077	0.261	0.144	0.135	0.085	0.096	0.077	0.067	0.059	0.07	0.003	0.004
1405	Form_1728	ANK3	LOC108705106	gnl|gene16632|XL-9_2-gene16632|rna48588|	22	5000	LEPHEASPDKHGN	K.DQLEPHEASPDK.H	Ankyrin-3						0.025	0.022	0.079	0.113	0.106	0.143	0.131	0.171	0.177	0.015	0.02	0.099	0.08	0.107	0.093	0.106	0.093	0.083	0.087	0.094	0.076	0.084	0.027	0.019	0.091	0.113	0.121	0.143	0.117	0.16	0.179	0.012	0.018
3948	Form_4851	ANK3	LOC108696078	gnl|gene47899|XL-9_2-gene47899|rna93207|	4426	17.1	RLESNVSPSESIT	R.LESNVSPSESITEGK.T	Ankyrin-3						0.015	0.014	0.053	0.114	0.113	0.149	0.107	0.159	0.134	0.062	0.081	0.101	0.085	0.117	0.086	0.091	0.094	0.099	0.079	0.093	0.078	0.076	0.017	0.013	0.069	0.109	0.115	0.156	0.118	0.14	0.139	0.054	0.069
975	Form_1200	ANKHD1	ankhd1.S	gnl|gene14514|XL-9_2-gene14514|rna42265|	180;182	39.1	RMRADSTLSTGQV;RADSTLSTGQVDN	R.ADSTLSTGQVDNR.S	Ankyrin repeat and KH domain-containing protein 1 (Fragment)						0.017	0.013	0.124	0.126	0.123	0.15	0.123	0.142	0.157	0.014	0.011	0.163	0.16	0.064	0.062	0.06	0.061	0.054	0.06	0.056	0.118	0.14	0.042	0.033	0.123	0.122	0.115	0.142	0.103	0.133	0.137	0.025	0.025
976	Form_1201	ANKHD1	ankhd1.S	gnl|gene14514|XL-9_2-gene14514|rna42265|	1499	31.9	GGTNRNSDSENLD	R.GGGTNRNSDSENLDNDCNSESSAGDK.S	Ankyrin repeat and KH domain-containing protein 1 (Fragment)						0.044	0.018	0.143	0.111	0.16	0.108	0.155	0.102	0.154	0.001	0.003	0.163	0.16	0.064	0.062	0.06	0.061	0.054	0.06	0.056	0.118	0.14	0.109	0.044	0.139	0.104	0.146	0.1	0.127	0.093	0.131	0.001	0.007
2926	Form_3600	ANKHD1	LOC108710905	gnl|gene38103|XL-9_2-gene38103|rna79134|	1499	13.1	RANVATTPSTNRK	R.ANVATTPSTNR.K	Ankyrin repeat and KH domain-containing protein 1 (Fragment)	GN:ANKHD1|ANKHD1|human|Q8IWZ3	0	1538	RANVVTTPSTNRK	NaN	0.005	0.02	0.244	0.152	0.128	0.118	0.102	0.094	0.093	0.014	0.03	0.105	0.113	0.071	0.077	0.079	0.082	0.085	0.086	0.075	0.108	0.119	0.007	0.028	0.215	0.145	0.126	0.12	0.108	0.1	0.087	0.019	0.044
2927	Form_3599	ANKHD1	LOC108710905	gnl|gene38103|XL-9_2-gene38103|rna79134|	1982	43.1	VDMFSLSPARFNN	K.TDQPVDMFSLSPAR.F	Ankyrin repeat and KH domain-containing protein 1 (Fragment)						0.039	0.048	0.182	0.157	0.145	0.13	0.102	0.067	0.101	0.01	0.019	0.105	0.113	0.071	0.077	0.079	0.082	0.085	0.086	0.075	0.108	0.119	0.05	0.066	0.158	0.147	0.14	0.13	0.106	0.07	0.092	0.013	0.028
4067	Form_4993	ANKLE1	LOC108712891	gnl|gene49522|XL-9_2-gene49522|rna95538|	102	15.7	RKGGDPTLEDQEG	K.GGDPTLEDQEGNTASDLALMEGNR.R	Ankyrin repeat and LEM domain-containing protein 1						0.022	0.034	0.079	0.112	0.103	0.133	0.167	0.125	0.177	0.023	0.026	0.103	0.085	0.077	0.079	0.102	0.093	0.089	0.099	0.081	0.102	0.09	0.025	0.032	0.068	0.099	0.118	0.139	0.167	0.139	0.161	0.026	0.026
4068	Form_4992	ANKLE1	LOC108712891	gnl|gene49522|XL-9_2-gene49522|rna95538|	396	28.3	ILDSNDSDNTKEH	K.THILDSNDSDNTK.E	Ankyrin repeat and LEM domain-containing protein 1						0.092	0.056	0.111	0.113	0.091	0.113	0.089	0.105	0.184	0.024	0.023	0.103	0.085	0.077	0.079	0.102	0.093	0.089	0.099	0.081	0.102	0.09	0.106	0.053	0.096	0.1	0.104	0.118	0.089	0.117	0.167	0.028	0.023
3597	Form_4416	ANKLE2	ankle2.L	gnl|gene4450|XL-9_2-gene4450|rna12983|	141	5000	ADNKQHTPCIQQK	K.QHTPCIQQK.N	Ankyrin repeat and LEM domain-containing protein 2						0.016	0.012	0.224	0.157	0.081	0.114	0.105	0.1	0.087	0.04	0.065	0.085	0.087	0.079	0.086	0.105	0.108	0.1	0.094	0.102	0.084	0.07	0.015	0.011	0.194	0.148	0.094	0.135	0.115	0.103	0.098	0.037	0.05
3598	Form_4415	ANKLE2	ankle2.L	gnl|gene4450|XL-9_2-gene4450|rna12983|	799;808	5000	SLQDKLSPPRNHI;RNHIGLSPPRASS	K.LSPPRNHIGLSPPR.A	Ankyrin repeat and LEM domain-containing protein 2						0.019	0.016	0.126	0.118	0.118	0.128	0.103	0.14	0.119	0.055	0.059	0.085	0.087	0.079	0.086	0.105	0.108	0.1	0.094	0.102	0.084	0.07	0.017	0.015	0.106	0.108	0.132	0.148	0.11	0.141	0.13	0.049	0.044
3599	Form_4417	ANKLE2	ankle2.L	gnl|gene4450|XL-9_2-gene4450|rna12983|	885	71.3	SRQSWPSPALVSG	R.QSWPSPALVSGR.S	Ankyrin repeat and LEM domain-containing protein 2						0.008	0.031	0.15	0.127	0.11	0.14	0.094	0.108	0.086	0.067	0.08	0.085	0.087	0.079	0.086	0.105	0.108	0.1	0.094	0.102	0.084	0.07	0.007	0.029	0.128	0.118	0.125	0.164	0.102	0.11	0.095	0.061	0.061
3335	Form_4108	ANKRD17	LOC108711102	gnl|gene42136|XL-9_2-gene42136|rna84885|	82	71.3	AGASPVSPTGTGP	R.RQQGAGASPVSPTGTGPPGR.N	Ankyrin repeat domain-containing protein 17 (Fragment)						0.149	0.135	0.154	0.106	0.076	0.08	0.06	0.045	0.045	0.044	0.104	0.088	0.085	0.086	0.088	0.099	0.092	0.097	0.093	0.095	0.084	0.094	0.146	0.128	0.147	0.104	0.084	0.082	0.065	0.047	0.048	0.041	0.109
3335	Form_4110	ANKRD17	LOC108711102	gnl|gene42136|XL-9_2-gene42136|rna84885|	79;82	136	QQGAGASPVSPTG;AGASPVSPTGTGP	R.QQGAGASPVSPTGTGPPGR.N	Ankyrin repeat domain-containing protein 17 (Fragment)						0.03	0.028	0.12	0.129	0.126	0.151	0.11	0.115	0.115	0.035	0.04	0.088	0.085	0.086	0.088	0.099	0.092	0.097	0.093	0.095	0.084	0.094	0.029	0.026	0.112	0.123	0.136	0.151	0.116	0.116	0.119	0.032	0.041
3336	Form_4109	ANKRD17	LOC108711102	gnl|gene42136|XL-9_2-gene42136|rna84885|	1652	41	PSVLVTSPKEERK	K.KPSVLVTSPK.E	Ankyrin repeat domain-containing protein 17 (Fragment)						0.117	0.093	0.137	0.126	0.116	0.12	0.092	0.095	0.089	0.007	0.009	0.088	0.085	0.086	0.088	0.099	0.092	0.097	0.093	0.095	0.084	0.094	0.113	0.087	0.129	0.122	0.126	0.121	0.098	0.097	0.093	0.006	0.009
3337	Form_4107	ANKRD17	LOC108711102	gnl|gene42136|XL-9_2-gene42136|rna84885|	2059	115.6	SDCLTCSPNKGTS	R.SSPSDCLTCSPNK.G	Ankyrin repeat domain-containing protein 17 (Fragment)						0.042	0.026	0.102	0.134	0.132	0.146	0.115	0.144	0.14	0.008	0.011	0.088	0.085	0.086	0.088	0.099	0.092	0.097	0.093	0.095	0.084	0.094	0.04	0.024	0.095	0.127	0.141	0.145	0.121	0.145	0.144	0.007	0.011
3338	Form_4111	ANKRD17	LOC108711102	gnl|gene42136|XL-9_2-gene42136|rna84885|	2195	29.2	QVPAQNSPVTTLV	K.NQVPAQNSPVTTLVSHANIK.R	Ankyrin repeat domain-containing protein 17 (Fragment)						0.008	0.031	0.182	0.159	0.114	0.125	0.118	0.092	0.067	0.034	0.07	0.088	0.085	0.086	0.088	0.099	0.092	0.097	0.093	0.095	0.084	0.094	0.008	0.029	0.171	0.153	0.123	0.125	0.125	0.093	0.069	0.031	0.072
1523	Form_1869	ANKRD27	ankrd27.L	gnl|gene17289|XL-9_2-gene17289|rna50457|	993	219.1	EDDERLSPGKTKL	R.SSVEVQEALEDDERLSPGK.T	Ankyrin repeat domain-containing protein 27						0.07	0.054	0.054	0.088	0.089	0.077	0.169	0.199	0.18	0.008	0.012	0.093	0.093	0.101	0.096	0.1	0.097	0.083	0.085	0.083	0.08	0.089	0.073	0.056	0.061	0.094	0.1	0.084	0.157	0.189	0.167	0.007	0.012
4185	Form_5138	ANKS1A	LOC733397	gnl|gene50365|XL-9_2-gene50365|rna96844|	627	60.2	KRSLEKSPSFTSE	K.SPSFTSEWDEIDK.I	Ankyrin repeat and SAM domain-containing protein 1A (Fragment)						0.01	0.006	0.072	0.074	0.12	0.139	0.177	0.146	0.239	0.006	0.013	0.087	0.084	0.074	0.081	0.094	0.09	0.095	0.121	0.1	0.082	0.092	0.009	0.005	0.055	0.062	0.117	0.13	0.175	0.183	0.248	0.005	0.012
4185	Form_5139	ANKS1A	LOC733397	gnl|gene50365|XL-9_2-gene50365|rna96844|	627;629	60.2	KRSLEKSPSFTSE;SLEKSPSFTSEWD	K.SPSFTSEWDEIDK.I	Ankyrin repeat and SAM domain-containing protein 1A (Fragment)	GN:ANKS1A|ANKS1A|human|Q92625	0;0	661;663	KKRLEKSPSFASE;RLEKSPSFASEWD	NaN;NaN	0.009	0.013	0.064	0.094	0.093	0.188	0.146	0.215	0.158	0.013	0.007	0.087	0.084	0.074	0.081	0.094	0.09	0.095	0.121	0.1	0.082	0.092	0.008	0.011	0.049	0.078	0.09	0.174	0.143	0.267	0.162	0.011	0.007
1542	Form_1901	ANLN	anln-like.1.L	gnl|gene17387|XL-9_2-gene17387|rna50761|	19	60.1	PDSGNESPRKKRF	K.RLCPDSGNESPRK.K	Anillin						0.09	0.091	0.123	0.129	0.124	0.133	0.093	0.111	0.095	0.004	0.005	0.081	0.084	0.089	0.095	0.099	0.1	0.095	0.086	0.099	0.087	0.084	0.079	0.083	0.119	0.133	0.133	0.144	0.096	0.103	0.102	0.004	0.005
1543	Form_1899	ANLN	anln-like.1.L	gnl|gene17387|XL-9_2-gene17387|rna50761|	94	5000	QDPEGFSDGLGEK	K.QDPEGFSDGLGEK.S	Anillin						0.03	0.019	0.082	0.094	0.119	0.138	0.118	0.176	0.21	0.003	0.01	0.081	0.084	0.089	0.095	0.099	0.1	0.095	0.086	0.099	0.087	0.084	0.026	0.017	0.077	0.095	0.125	0.146	0.119	0.161	0.221	0.003	0.009
1544	Form_1895	ANLN	anln-like.1.L	gnl|gene17387|XL-9_2-gene17387|rna50761|	113	55.6	QDSSLFSEPEKRR	K.SWTDNLQDSSLFSEPEK.R	Anillin						0.05	0.051	0.065	0.09	0.089	0.104	0.145	0.189	0.183	0.013	0.021	0.081	0.084	0.089	0.095	0.099	0.1	0.095	0.086	0.099	0.087	0.084	0.044	0.046	0.062	0.092	0.095	0.112	0.148	0.175	0.195	0.012	0.019
1544	Form_1896	ANLN	anln-like.1.L	gnl|gene17387|XL-9_2-gene17387|rna50761|	109;113	55.6	TDNLQDSSLFSEP;QDSSLFSEPEKRR	K.SWTDNLQDSSLFSEPEK.R	Anillin						0.042	0.056	0.055	0.085	0.087	0.103	0.148	0.219	0.174	0.011	0.02	0.081	0.084	0.089	0.095	0.099	0.1	0.095	0.086	0.099	0.087	0.084	0.037	0.051	0.053	0.087	0.093	0.111	0.152	0.203	0.186	0.01	0.018
1544	Form_1903	ANLN	anln-like.1.L	gnl|gene17387|XL-9_2-gene17387|rna50761|	101	37	DGLGEKSWTDNLQ	K.SWTDNLQDSSLFSEPEK.R	Anillin						0.021	0.02	0.142	0.14	0.119	0.147	0.115	0.133	0.1	0.023	0.04	0.081	0.084	0.089	0.095	0.099	0.1	0.095	0.086	0.099	0.087	0.084	0.018	0.018	0.135	0.143	0.126	0.158	0.117	0.123	0.106	0.021	0.036
1545	Form_1894	ANLN	anln-like.1.L	gnl|gene17387|XL-9_2-gene17387|rna50761|	300	15	PLQQEGTMSPSCN	K.LQSTLNSDSCDGGIPLQQEGTMSPSCNPQEAK.D	Anillin						0.064	0.065	0.127	0.126	0.125	0.122	0.087	0.108	0.084	0.034	0.058	0.081	0.084	0.089	0.095	0.099	0.1	0.095	0.086	0.099	0.087	0.084	0.056	0.059	0.122	0.13	0.134	0.132	0.09	0.101	0.09	0.032	0.053
1546	Form_1893	ANLN	anln-like.1.L	gnl|gene17387|XL-9_2-gene17387|rna50761|	319;322	90.9	PNQGIYSDDSEEV;GIYSDDSEEVRGQ	K.DPNQGIYSDDSEEVR.G	Anillin						0.068	0.037	0.11	0.099	0.126	0.141	0.112	0.136	0.16	0.002	0.009	0.081	0.084	0.089	0.095	0.099	0.1	0.095	0.086	0.099	0.087	0.084	0.059	0.033	0.105	0.101	0.133	0.151	0.114	0.125	0.169	0.002	0.008
1546	Form_1902	ANLN	anln-like.1.L	gnl|gene17387|XL-9_2-gene17387|rna50761|	322	90.9	GIYSDDSEEVRGQ	K.DPNQGIYSDDSEEVR.G	Anillin						0.043	0.027	0.085	0.109	0.101	0.113	0.125	0.142	0.239	0.003	0.013	0.081	0.084	0.089	0.095	0.099	0.1	0.095	0.086	0.099	0.087	0.084	0.037	0.024	0.081	0.11	0.106	0.12	0.127	0.13	0.252	0.003	0.012
1547	Form_1897	ANLN	anln-like.1.L	gnl|gene17387|XL-9_2-gene17387|rna50761|	330;334	5000	EVRGQVTMDNSAF;QVTMDNSAFIDRL	R.GQVTMDNSAFIDR.L	Anillin						0.018	0.037	0.212	0.15	0.104	0.141	0.097	0.119	0.105	0.008	0.009	0.081	0.084	0.089	0.095	0.099	0.1	0.095	0.086	0.099	0.087	0.084	0.016	0.033	0.202	0.153	0.11	0.151	0.099	0.11	0.111	0.007	0.008
1547	Form_1898	ANLN	anln-like.1.L	gnl|gene17387|XL-9_2-gene17387|rna50761|	334	5000	QVTMDNSAFIDRL	R.GQVTMDNSAFIDR.L	Anillin						0.064	0.105	0.169	0.165	0.111	0.123	0.081	0.089	0.075	0.01	0.009	0.081	0.084	0.089	0.095	0.099	0.1	0.095	0.086	0.099	0.087	0.084	0.056	0.096	0.163	0.17	0.119	0.133	0.083	0.083	0.081	0.009	0.008
1548	Form_1900	ANLN	anln-like.1.L	gnl|gene17387|XL-9_2-gene17387|rna50761|	410	146.1	PNTRDDSPLLYSI	R.DDSPLLYSIDAYR.T	Anillin						0.023	0.01	0.105	0.118	0.183	0.105	0.152	0.12	0.154	0.009	0.021	0.081	0.084	0.089	0.095	0.099	0.1	0.095	0.086	0.099	0.087	0.084	0.02	0.009	0.099	0.119	0.192	0.111	0.153	0.109	0.161	0.008	0.019
3583	Form_4398	ANLN	anln.L	gnl|gene44365|XL-9_2-gene44365|rna88207|	72	48	PSKRRCSDNASTP	R.RCSDNASTPDAGAENK.Q	Anillin						0.064	0.07	0.133	0.179	0.114	0.127	0.078	0.109	0.088	0.011	0.028	0.07	0.067	0.071	0.071	0.096	0.099	0.096	0.098	0.12	0.124	0.088	0.051	0.054	0.108	0.146	0.126	0.144	0.086	0.122	0.121	0.015	0.028
2900	Form_3569	ANO1	ano1.L	gnl|gene37785|XL-9_2-gene37785|rna78631|	989	61.1	ENCNSQSPGLSRS	K.GENCNSQSPGLSR.S	Anoctamin						0.102	0.07	0.102	0.112	0.101	0.104	0.092	0.11	0.111	0.038	0.058	0.097	0.087	0.102	0.101	0.11	0.1	0.093	0.084	0.081	0.068	0.077	0.106	0.065	0.112	0.122	0.119	0.112	0.092	0.099	0.097	0.028	0.048
206	Form__262	ANO10	ano10.L	gnl|gene10958|XL-9_2-gene10958|rna31855|	642	24.7	MKLSSESLTDDDD	K.LSSESLTDDDDAMNS.-	Anoctamin-10						0.087	0.06	0.125	0.108	0.132	0.127	0.12	0.117	0.117	0.002	0.005	0.085	0.091	0.081	0.093	0.089	0.098	0.088	0.097	0.086	0.099	0.094	0.082	0.061	0.113	0.112	0.131	0.138	0.117	0.126	0.112	0.002	0.005
206	Form__263	ANO10	ano10.L	gnl|gene10958|XL-9_2-gene10958|rna31855|	644	73.2	LSSESLTDDDDAM	K.LSSESLTDDDDAMNS.-	Anoctamin-10						0.087	0.044	0.107	0.083	0.099	0.099	0.114	0.109	0.126	0.053	0.08	0.085	0.091	0.081	0.093	0.089	0.098	0.088	0.097	0.086	0.099	0.094	0.082	0.044	0.096	0.085	0.097	0.107	0.111	0.117	0.12	0.058	0.083
1222	Form_1516	ANP32B	anp32b.L	gnl|gene15784|XL-9_2-gene15784|rna46111|	257	5000	EKRKRDTDDEGDE	K.RDTDDEGDEEDD.-	Acidic leucine-rich nuclear phosphoprotein 32 family member B						0.031	0.054	0.12	0.088	0.107	0.13	0.132	0.114	0.154	0.014	0.056	0.097	0.103	0.088	0.093	0.091	0.096	0.08	0.087	0.078	0.1	0.088	0.034	0.063	0.12	0.093	0.11	0.141	0.12	0.112	0.136	0.016	0.056
1513	Form_1856	ANP32B	anp32c.L	gnl|gene17236|XL-9_2-gene17236|rna50319|	224	5000	KRKRDLSDEGEEE	R.DLSDEGEEEEEEEDDEDDE.-	Acidic leucine-rich nuclear phosphoprotein 32 family member B						0.121	0.058	0.113	0.131	0.112	0.118	0.101	0.108	0.119	0.008	0.011	0.093	0.079	0.095	0.083	0.098	0.09	0.099	0.101	0.102	0.078	0.083	0.12	0.049	0.115	0.116	0.117	0.114	0.107	0.117	0.13	0.007	0.01
2271	Form_2788	ANP32E	anp32e.L	gnl|gene2458|XL-9_2-gene2458|rna7155|	15	5000	LELRNRSPAEVAE	R.SPAEVAELVLDNCR.S	Acidic leucine-rich nuclear phosphoprotein 32 family member E	GN:ANP32E|LANP-L|human|Q9BTT0	0	15	LELRNRSPEEVTE	NaN	0.11	0.083	0.079	0.126	0.114	0.086	0.09	0.135	0.162	0.006	0.009	0.083	0.073	0.092	0.081	0.084	0.085	0.111	0.086	0.094	0.109	0.102	0.104	0.069	0.083	0.116	0.109	0.083	0.113	0.132	0.173	0.007	0.011
2272	Form_2787	ANP32E	anp32e.L	gnl|gene2458|XL-9_2-gene2458|rna7155|	40	28.4	IEGLNDSYKELEF	R.SVDGEIEGLNDSYK.E	Acidic leucine-rich nuclear phosphoprotein 32 family member E						0.043	0.034	0.076	0.099	0.124	0.148	0.104	0.157	0.203	0.005	0.007	0.083	0.073	0.092	0.081	0.084	0.085	0.111	0.086	0.094	0.109	0.102	0.04	0.028	0.078	0.09	0.116	0.141	0.129	0.151	0.213	0.006	0.008
187	Form__240	ANXA1	anxa1.L	gnl|gene1078|XL-9_2-gene1078|rna3135|	183	27.4	DIAGDTSGDFQKT	K.DIAGDTSGDFQK.T	Annexin A1						0.092	0.057	0.104	0.101	0.117	0.133	0.112	0.143	0.096	0.017	0.028	0.09	0.109	0.093	0.122	0.087	0.096	0.083	0.089	0.1	0.07	0.064	0.088	0.066	0.103	0.131	0.108	0.136	0.099	0.135	0.102	0.013	0.019
4215	Form_5171	ANXA1	anxa1	gnl|gene50769|XL-9_2-gene50769|rna97410|	38	18.3	PGFNASTDAAVLD	K.GAPGFNASTDAAVLDK.A	Annexin A1						0.086	0.056	0.077	0.112	0.125	0.107	0.141	0.139	0.145	0.004	0.008	0.12	0.131	0.125	0.091	0.09	0.096	0.074	0.073	0.066	0.069	0.064	0.115	0.081	0.107	0.113	0.125	0.114	0.116	0.113	0.106	0.003	0.006
3572	Form_4386	AOX1	LOC108701449	gnl|gene44214|XL-9_2-gene44214|rna88010|	1285	18.4	KDFTLNSPAGPER	K.DFTLNSPAGPER.I	Aldehyde oxidase						0.008	0.019	0.14	0.141	0.105	0.128	0.098	0.138	0.151	0.026	0.047	0.094	0.103	0.094	0.092	0.095	0.097	0.088	0.089	0.087	0.082	0.079	0.008	0.021	0.144	0.142	0.11	0.136	0.095	0.135	0.144	0.023	0.041
3866	Form_4751	AP1M1	LOC108712381	gnl|gene47021|XL-9_2-gene47021|rna92017|	152;154	54.4	APRPPATVTNAVS;RPPATVTNAVSWR	K.LETGAPRPPATVTNAVSWR.S	AP-1 complex subunit mu-1	GN:AP1M1|AP1M1|human|Q9BXS5	0;0	152;154	APRPPATVTNAVS;RPPATVTNAVSWR	NaN;NaN	0.069	0.042	0.097	0.117	0.108	0.109	0.117	0.133	0.136	0.028	0.043	0.087	0.086	0.089	0.084	0.094	0.09	0.087	0.082	0.087	0.11	0.104	0.068	0.041	0.097	0.111	0.114	0.111	0.115	0.123	0.133	0.035	0.05
4087	Form_5013	AP2A2	LOC108714918	gnl|gene49639|XL-9_2-gene49639|rna95708|	598	29.2	KKKKGPSTVTDLE	K.KGPSTVTDLEDTK.K	AP-2 complex subunit alpha-2	GN:AP2A2|AP2A2|human|O94973	0	622	KKKKGPSTVTDLE	NaN	0.01	0.018	0.121	0.128	0.129	0.134	0.124	0.16	0.151	0.009	0.015	0.082	0.081	0.088	0.09	0.099	0.103	0.102	0.094	0.097	0.086	0.078	0.009	0.015	0.112	0.121	0.134	0.145	0.133	0.158	0.154	0.008	0.012
1050	Form_1295	AP2M1	ap2m1.S	gnl|gene14839|XL-9_2-gene14839|rna43291|	156	110.8	QITSQVTGQIGWR	K.EEQSQITSQVTGQIGWR.R	AP-2 complex subunit mu	GN:AP2M1|AP2M1|human|Q96CW1	0	156	QITSQVTGQIGWR	3	0.046	0.04	0.04	0.043	0.047	0.056	0.13	0.181	0.128	0.127	0.164	0.08	0.074	0.09	0.092	0.103	0.098	0.095	0.094	0.106	0.087	0.08	0.04	0.032	0.039	0.043	0.053	0.06	0.135	0.186	0.148	0.121	0.144
1598	Form_1967	AP3B1	ap3b1.S	gnl|gene17637|XL-9_2-gene17637|rna51538|	690;692	51.8	SSDKFYSDSEEKE;DKFYSDSEEKEKG	K.FYSDSEEK.E	AP-3 complex subunit beta-1						0.163	0.042	0.212	0.065	0.155	0.065	0.115	0.041	0.135	0.001	0.006	0.072	0.075	0.075	0.073	0.084	0.08	0.105	0.115	0.11	0.103	0.108	0.136	0.037	0.185	0.055	0.151	0.06	0.14	0.055	0.173	0.001	0.008
3505	Form_4309	AP3B1	ap3b1.L	gnl|gene4326|XL-9_2-gene4326|rna12619|	290	41.8	IKSFYESDEEKDA	K.SFYESDEEK.D	AP-3 complex subunit beta-1						0.106	0.141	0.07	0.125	0.082	0.142	0.086	0.167	0.076	0.002	0.003	0.087	0.089	0.094	0.097	0.093	0.096	0.086	0.097	0.083	0.088	0.087	0.1	0.136	0.072	0.132	0.083	0.148	0.08	0.176	0.069	0.002	0.003
3506	Form_4310	AP3B1	ap3b1.L	gnl|gene4326|XL-9_2-gene4326|rna12619|	691;693	95	SSDKFYSDSEQEE;DKFYSDSEQEEKE	K.FYSDSEQEEK.E	AP-3 complex subunit beta-1						0.104	0.068	0.147	0.101	0.126	0.105	0.116	0.093	0.133	0	0.006	0.087	0.089	0.094	0.097	0.093	0.096	0.086	0.097	0.083	0.088	0.087	0.099	0.066	0.152	0.108	0.129	0.111	0.11	0.099	0.121	0	0.006
363	Form__467	AP3D1	ap3d1.S	gnl|gene11687|XL-9_2-gene11687|rna33962|	829;834	87.2	NAEIQKSPENETP;KSPENETPTSDQK	R.NAEIQKSPENETPTSDQK.I	AP-3 complex subunit delta (Fragment)						0.001	0.001	0.038	0.072	0.08	0.125	0.115	0.171	0.218	0.098	0.081	0.078	0.108	0.112	0.095	0.107	0.095	0.102	0.092	0.081	0.059	0.072	0.001	0.001	0.048	0.077	0.097	0.134	0.133	0.178	0.199	0.065	0.066
363	Form__468	AP3D1	ap3d1.S	gnl|gene11687|XL-9_2-gene11687|rna33962|	829	87.2	NAEIQKSPENETP	K.SPENETPTSDQK.I	AP-3 complex subunit delta (Fragment)						0.068	0.04	0.106	0.092	0.113	0.111	0.095	0.088	0.175	0.066	0.046	0.078	0.108	0.112	0.095	0.107	0.095	0.102	0.092	0.081	0.059	0.072	0.058	0.047	0.129	0.095	0.131	0.115	0.105	0.088	0.154	0.042	0.036
1095	Form_1357	AP3D1	ap3d1.L	gnl|gene15088|XL-9_2-gene15088|rna44026|	829	65.8	NAEIKKSPENESP	K.KSPENESPTSDQK.I	AP-3 complex subunit delta (Fragment)						0.103	0.059	0.08	0.056	0.055	0.026	0.029	0.019	0.016	0.223	0.335	0.089	0.084	0.099	0.096	0.098	0.094	0.094	0.089	0.092	0.083	0.082	0.105	0.057	0.091	0.062	0.062	0.028	0.031	0.019	0.017	0.213	0.316
4383	Form_5382	APBA1	apba1.L	gnl|gene5689|XL-9_2-gene5689|rna16659|	759;764	31.4	RRPDLRYQLGFSV;RYQLGFSVQNGII	R.YQLGFSVQNGIICSLMR.G	Amyloid-beta A4 precursor protein-binding family A member 1	GN:APBA1|APBA1|human|Q02410	1;1	757;762	RRPDLRYQLGFSV;RYQLGFSVQNGII	NaN;NaN	0.044	0.024	0.041	0.073	0.08	0.114	0.141	0.23	0.217	0.014	0.021	0.106	0.11	0.112	0.101	0.1	0.1	0.082	0.069	0.07	0.071	0.079	0.055	0.032	0.055	0.088	0.095	0.135	0.137	0.189	0.181	0.012	0.02
4620	Form_5667	APBA3	apba3.L	gnl|gene6910|XL-9_2-gene6910|rna20189|	155	51.5	QKPRRVSESEIML	R.RVSESEIMLSNSR.G	Amyloid-beta A4 precursor protein-binding family A member 3						0.108	0.079	0.124	0.117	0.125	0.123	0.102	0.093	0.106	0.007	0.015	0.095	0.096	0.088	0.098	0.098	0.093	0.087	0.089	0.088	0.081	0.086	0.111	0.082	0.118	0.124	0.133	0.124	0.096	0.09	0.101	0.006	0.014
4621	Form_5666	APBA3	apba3.L	gnl|gene6910|XL-9_2-gene6910|rna20189|	378	25.7	IPRAQDSPTQKKP	R.AQDSPTQK.K	Amyloid-beta A4 precursor protein-binding family A member 3						0.007	0.062	0.149	0.051	0.096	0.143	0.123	0.199	0.163	0.002	0.005	0.095	0.096	0.088	0.098	0.098	0.093	0.087	0.089	0.088	0.081	0.086	0.007	0.065	0.144	0.055	0.103	0.146	0.118	0.195	0.158	0.002	0.005
1067	Form_1322	APC	apc.S	gnl|gene14921|XL-9_2-gene14921|rna43549|	2082	74.9	DLRDLQSPVSENA	R.DLQSPVSENALSPDSENFDWK.A	Adenomatous polyposis coli protein (Fragment)						0.02	0.017	0.139	0.121	0.134	0.101	0.108	0.09	0.146	0.06	0.064	0.121	0.093	0.113	0.077	0.09	0.085	0.084	0.081	0.073	0.094	0.09	0.028	0.018	0.178	0.106	0.137	0.098	0.103	0.083	0.121	0.064	0.065
1068	Form_1323	APC	apc.S	gnl|gene14921|XL-9_2-gene14921|rna43549|	2778	30.3	NPSPRKSNSDNST	K.SNSDNSTSRPSQIPTPVTTSTK.K	Adenomatous polyposis coli protein (Fragment)						0.028	0.019	0.077	0.115	0.177	0.18	0.12	0.112	0.152	0.007	0.013	0.121	0.093	0.113	0.077	0.09	0.085	0.084	0.081	0.073	0.094	0.09	0.04	0.02	0.101	0.103	0.185	0.178	0.117	0.105	0.129	0.008	0.014
2666	Form_3279	APC	apc.L	gnl|gene3528|XL-9_2-gene3528|rna10261|	1150	20.3	NFSERYSEEEQQE	K.TSNFSERYSEEEQQEDETETR.Q	Adenomatous polyposis coli protein (Fragment)	GN:APC|APC|human|P25054	0	1148	NYSERYSEEEQHE	NaN	0.118	0.069	0.109	0.111	0.102	0.108	0.103	0.13	0.131	0.008	0.011	0.072	0.081	0.095	0.089	0.102	0.105	0.092	0.099	0.106	0.089	0.07	0.091	0.06	0.111	0.105	0.111	0.121	0.101	0.137	0.148	0.008	0.008
2667	Form_3278	APC	apc.L	gnl|gene3528|XL-9_2-gene3528|rna10261|	2412	36.7	QNVNTGSNKKVEL	K.SLNQNVNTGSNK.K	Adenomatous polyposis coli protein (Fragment)						0.007	0.008	0.141	0.122	0.078	0.116	0.132	0.193	0.19	0.002	0.01	0.072	0.081	0.095	0.089	0.102	0.105	0.092	0.099	0.106	0.089	0.07	0.005	0.007	0.137	0.111	0.081	0.124	0.124	0.195	0.206	0.002	0.007
567	Form__718	API5	api5.L	gnl|gene12657|XL-9_2-gene12657|rna36767|	465	19.5	DETSSTSPPKKPI	K.RTSDETSSTSPPK.K	Apoptosis inhibitor 5						0.099	0.092	0.127	0.116	0.096	0.13	0.106	0.133	0.099	0	0.003	0.111	0.097	0.105	0.11	0.108	0.097	0.08	0.076	0.087	0.061	0.068	0.114	0.093	0.138	0.132	0.108	0.131	0.088	0.105	0.089	0	0.002
909	Form_1114	API5	api5.S	gnl|gene14264|XL-9_2-gene14264|rna41561|	464	43.4	DETSSTSPPKKPV	K.RMSDETSSTSPPK.K	Apoptosis inhibitor 5						0.123	0.07	0.201	0.135	0.14	0.14	0.062	0.053	0.076	0	0.002	0.083	0.088	0.059	0.074	0.075	0.069	0.109	0.114	0.101	0.108	0.121	0.129	0.078	0.15	0.127	0.133	0.122	0.085	0.076	0.097	0	0.003
630	Form__787	APLF	aplf.L	gnl|gene12985|XL-9_2-gene12985|rna37735|	336;338	107.2	THGDDLSLSPDED;GDDLSLSPDEDEE	K.TTHGDDLSLSPDEDEESEK.A	Aprataxin and PNK-like factor						0.097	0.045	0.117	0.114	0.132	0.112	0.119	0.127	0.126	0.003	0.007	0.101	0.102	0.087	0.094	0.087	0.105	0.084	0.085	0.091	0.08	0.083	0.107	0.05	0.111	0.117	0.125	0.128	0.109	0.118	0.125	0.003	0.006
630	Form__788	APLF	aplf.L	gnl|gene12985|XL-9_2-gene12985|rna37735|	338	107.2	GDDLSLSPDEDEE	K.TTHGDDLSLSPDEDEESEK.A	Aprataxin and PNK-like factor						0.094	0.048	0.112	0.081	0.107	0.074	0.094	0.088	0.1	0.072	0.13	0.101	0.102	0.087	0.094	0.087	0.105	0.084	0.085	0.091	0.08	0.083	0.106	0.055	0.109	0.085	0.104	0.086	0.088	0.083	0.101	0.064	0.12
2083	Form_2549	APOB	vtgb1.S	gnl|gene20013|XL-9_2-gene20013|rna58415|	273	45.4	TKSSRNSESQVQL	K.SSRNSESQVQLTK.R	Apolipoprotein B-100						0.131	0.066	0.111	0.103	0.104	0.125	0.1	0.102	0.114	0.017	0.028	0.098	0.063	0.077	0.077	0.088	0.09	0.108	0.081	0.101	0.135	0.083	0.144	0.047	0.096	0.089	0.103	0.126	0.121	0.093	0.129	0.026	0.026
2084	Form_2546	APOB	vtgb1.S	gnl|gene20013|XL-9_2-gene20013|rna58415|	959	48.5	TSAESASMMEVSS	R.TSAESASMMEVSSEMGIR.N	Apolipoprotein B-100						0.097	0.051	0.07	0.078	0.073	0.106	0.124	0.204	0.141	0.023	0.033	0.098	0.063	0.077	0.077	0.088	0.09	0.108	0.081	0.101	0.135	0.083	0.105	0.036	0.06	0.067	0.071	0.106	0.149	0.183	0.158	0.035	0.03
2084	Form_2547	APOB	vtgb1.S	gnl|gene20013|XL-9_2-gene20013|rna58415|	957	66.1	GRTSAESASMMEV	R.TSAESASMMEVSSEMGIR.N	Apolipoprotein B-100						0.088	0.032	0.059	0.066	0.061	0.095	0.149	0.265	0.166	0.007	0.013	0.098	0.063	0.077	0.077	0.088	0.09	0.108	0.081	0.101	0.135	0.083	0.096	0.022	0.05	0.056	0.059	0.095	0.178	0.238	0.186	0.01	0.012
2084	Form_2551	APOB	vtgb1.S	gnl|gene20013|XL-9_2-gene20013|rna58415|	957;959	66.1	GRTSAESASMMEV;TSAESASMMEVSS	R.TSAESASMMEVSSEMGIRK.N	Apolipoprotein B-100						0.108	0.074	0.12	0.097	0.149	0.105	0.095	0.095	0.146	0.001	0.01	0.098	0.063	0.077	0.077	0.088	0.09	0.108	0.081	0.101	0.135	0.083	0.12	0.053	0.105	0.085	0.149	0.107	0.117	0.087	0.167	0.002	0.009
2085	Form_2550	APOB	vtgb1.S	gnl|gene20013|XL-9_2-gene20013|rna58415|	1120	5000	NKGAGETDVLEAG	K.GAGETDVLEAGR.N	Apolipoprotein B-100						0.126	0.109	0.114	0.107	0.116	0.139	0.082	0.093	0.1	0.002	0.013	0.098	0.063	0.077	0.077	0.088	0.09	0.108	0.081	0.101	0.135	0.083	0.142	0.079	0.101	0.095	0.118	0.144	0.102	0.087	0.116	0.003	0.012
2086	Form_2545	APOB	vtgb1.S	gnl|gene20013|XL-9_2-gene20013|rna58415|	1189	5000	DILSRVSQQAMNK	R.VSQQAMNK.E	Apolipoprotein B-100						0.056	0.091	0.1	0.07	0.068	0.093	0.104	0.181	0.223	0.002	0.012	0.098	0.063	0.077	0.077	0.088	0.09	0.108	0.081	0.101	0.135	0.083	0.062	0.065	0.087	0.061	0.068	0.095	0.127	0.166	0.255	0.003	0.011
2086	Form_2548	APOB	vtgb1.S	gnl|gene20013|XL-9_2-gene20013|rna58415|	1186;1189	5000	RKVDILSRVSQQA;DILSRVSQQAMNK	K.VDILSRVSQQAMNK.E	Apolipoprotein B-100						0.097	0.068	0.112	0.115	0.115	0.127	0.096	0.147	0.115	0.002	0.006	0.098	0.063	0.077	0.077	0.088	0.09	0.108	0.081	0.101	0.135	0.083	0.109	0.049	0.098	0.101	0.115	0.13	0.118	0.136	0.133	0.003	0.006
3032	Form_3721	APOB	LOC108714181	gnl|gene39111|XL-9_2-gene39111|rna80580|	964	24.7	ASMMEDSSEMGPR	R.SSAEGASMMEDSSEMGPRK.Y	Apolipoprotein B-100						0.144	0.045	0.08	0.089	0.072	0.131	0.122	0.163	0.138	0.006	0.011	0.091	0.066	0.083	0.078	0.082	0.088	0.1	0.086	0.103	0.134	0.089	0.147	0.033	0.075	0.078	0.066	0.129	0.137	0.157	0.16	0.009	0.011
3032	Form_3723	APOB	LOC108714181	gnl|gene39111|XL-9_2-gene39111|rna80580|	954	27.4	QSTGRSSAEGASM	R.SSAEGASMMEDSSEMGPRK.Y	Apolipoprotein B-100						0.104	0.073	0.131	0.132	0.134	0.168	0.07	0.09	0.084	0.003	0.012	0.091	0.066	0.083	0.078	0.082	0.088	0.1	0.086	0.103	0.134	0.089	0.11	0.056	0.127	0.12	0.128	0.172	0.081	0.09	0.101	0.004	0.012
3032	Form_3724	APOB	LOC108714181	gnl|gene39111|XL-9_2-gene39111|rna80580|	954;964	27.4	QSTGRSSAEGASM;ASMMEDSSEMGPR	R.SSAEGASMMEDSSEMGPRK.Y	Apolipoprotein B-100						0.119	0.043	0.061	0.094	0.074	0.14	0.129	0.173	0.147	0.005	0.014	0.091	0.066	0.083	0.078	0.082	0.088	0.1	0.086	0.103	0.134	0.089	0.121	0.032	0.057	0.082	0.068	0.138	0.144	0.167	0.17	0.008	0.014
3033	Form_3722	APOB	LOC108714181	gnl|gene39111|XL-9_2-gene39111|rna80580|	1282	20.8	GSSSSSSSSEMWT	K.YGSSSSSSGSSSSSSSSEMWTK.K	Apolipoprotein B-100						0.07	0.046	0.088	0.083	0.067	0.124	0.138	0.228	0.135	0.005	0.015	0.091	0.066	0.083	0.078	0.082	0.088	0.1	0.086	0.103	0.134	0.089	0.072	0.034	0.082	0.073	0.062	0.123	0.155	0.22	0.156	0.008	0.015
3033	Form_3725	APOB	LOC108714181	gnl|gene39111|XL-9_2-gene39111|rna80580|	1288	89	SSSEMWTKKKHHR	K.YGSSSSSSGSSSSSSSSEMWTK.K	Apolipoprotein B-100						0.06	0.043	0.106	0.111	0.127	0.138	0.069	0.092	0.071	0.052	0.132	0.091	0.066	0.083	0.078	0.082	0.088	0.1	0.086	0.103	0.134	0.089	0.061	0.032	0.099	0.097	0.117	0.136	0.077	0.089	0.082	0.079	0.132
3034	Form_3726	APOB	LOC108714181	gnl|gene39111|XL-9_2-gene39111|rna80580|	1630	123	INGIELSEERLPY	K.INGIELSEERLPYK.S	Apolipoprotein B-100						0.092	0.122	0.097	0.125	0.117	0.117	0.097	0.135	0.09	0.004	0.005	0.091	0.066	0.083	0.078	0.082	0.088	0.1	0.086	0.103	0.134	0.089	0.098	0.094	0.094	0.114	0.112	0.12	0.113	0.136	0.109	0.006	0.005
3127	Form_3840	APOB	vtga2.L	gnl|gene40201|XL-9_2-gene40201|rna82099|	959	72.3	TSAEGASMMEDSS	R.TSAEGASMMEDSSEMGPK.K	Apolipoprotein B-100						0.111	0.032	0.089	0.102	0.082	0.137	0.128	0.169	0.142	0.002	0.007	0.092	0.065	0.064	0.066	0.076	0.079	0.11	0.08	0.096	0.182	0.09	0.122	0.025	0.068	0.08	0.074	0.129	0.168	0.161	0.162	0.004	0.007
3127	Form_3841	APOB	vtga2.L	gnl|gene40201|XL-9_2-gene40201|rna82099|	953	14.6	FETTGRTSAEGAS	R.TSAEGASMMEDSSEMGPK.K	Apolipoprotein B-100						0.102	0.041	0.079	0.093	0.097	0.139	0.119	0.171	0.148	0.004	0.007	0.092	0.065	0.064	0.066	0.076	0.079	0.11	0.08	0.096	0.182	0.09	0.112	0.032	0.06	0.073	0.088	0.131	0.156	0.163	0.169	0.008	0.008
3127	Form_3842	APOB	vtga2.L	gnl|gene40201|XL-9_2-gene40201|rna82099|	954;964	26.7	ETTGRTSAEGASM;ASMMEDSSEMGPK	K.HFETTGRTSAEGASMMEDSSEMGPK.K	Apolipoprotein B-100						0.091	0.045	0.097	0.121	0.129	0.175	0.092	0.118	0.122	0.002	0.008	0.092	0.065	0.064	0.066	0.076	0.079	0.11	0.08	0.096	0.182	0.09	0.102	0.036	0.076	0.098	0.12	0.169	0.124	0.116	0.143	0.005	0.009
3127	Form_3843	APOB	vtga2.L	gnl|gene40201|XL-9_2-gene40201|rna82099|	964	26.7	ASMMEDSSEMGPK	K.HFETTGRTSAEGASMMEDSSEMGPK.K	Apolipoprotein B-100						0.122	0.033	0.083	0.08	0.105	0.113	0.129	0.151	0.178	0	0.007	0.092	0.065	0.064	0.066	0.076	0.079	0.11	0.08	0.096	0.182	0.09	0.132	0.025	0.063	0.062	0.094	0.105	0.167	0.143	0.202	0.001	0.007
3127	Form_3845	APOB	vtga2.L	gnl|gene40201|XL-9_2-gene40201|rna82099|	959;964	72.3	TSAEGASMMEDSS;ASMMEDSSEMGPK	R.TSAEGASMMEDSSEMGPK.K	Apolipoprotein B-100						0.163	0.015	0.053	0.055	0.042	0.078	0.18	0.215	0.188	0.003	0.009	0.092	0.065	0.064	0.066	0.076	0.079	0.11	0.08	0.096	0.182	0.09	0.169	0.011	0.038	0.041	0.036	0.07	0.223	0.194	0.204	0.006	0.009
3128	Form_3839	APOB	vtga2.L	gnl|gene40201|XL-9_2-gene40201|rna82099|	1252	5000	KQAKMQSNQHQQK	K.MQSNQHQQK.K	Apolipoprotein B-100						0.037	0.032	0.096	0.051	0.055	0.118	0.128	0.226	0.239	0.003	0.016	0.092	0.065	0.064	0.066	0.076	0.079	0.11	0.08	0.096	0.182	0.09	0.04	0.024	0.072	0.039	0.049	0.109	0.164	0.211	0.268	0.007	0.017
3129	Form_3844	APOB	vtga2.L	gnl|gene40201|XL-9_2-gene40201|rna82099|	1263	32.1	QKKNKFSESSSSS	K.FSESSSSSSSSSSSEMWNK.K	Apolipoprotein B-100						0.099	0.087	0.154	0.142	0.13	0.132	0.063	0.105	0.082	0.001	0.006	0.092	0.065	0.064	0.066	0.076	0.079	0.11	0.08	0.096	0.182	0.09	0.116	0.072	0.126	0.12	0.126	0.133	0.089	0.107	0.1	0.003	0.007
4154	Form_5105	APOB	vtgb1.L	gnl|gene50141|XL-9_2-gene50141|rna96457|	18	66.4	LAGSEKSQYEPFF	K.SQYEPFFSESK.T	Apolipoprotein B-100						0.117	0.068	0.119	0.109	0.123	0.123	0.104	0.105	0.117	0.004	0.011	0.092	0.069	0.075	0.08	0.085	0.09	0.103	0.084	0.099	0.142	0.083	0.123	0.054	0.102	0.1	0.12	0.127	0.123	0.101	0.133	0.007	0.01
4155	Form_5101	APOB	vtgb1.L	gnl|gene50141|XL-9_2-gene50141|rna96457|	273	31.2	TKSNRVSESQVQL	K.SNRVSESQVQLTK.R	Apolipoprotein B-100						0.106	0.059	0.124	0.096	0.109	0.125	0.102	0.121	0.111	0.019	0.029	0.092	0.069	0.075	0.08	0.085	0.09	0.103	0.084	0.099	0.142	0.083	0.111	0.046	0.106	0.087	0.105	0.128	0.119	0.116	0.125	0.03	0.027
4155	Form_5102	APOB	vtgb1.L	gnl|gene50141|XL-9_2-gene50141|rna96457|	275	45.1	SNRVSESQVQLTK	R.VSESQVQLTK.R	Apolipoprotein B-100						0.038	0.025	0.056	0.054	0.109	0.128	0.122	0.196	0.251	0.009	0.011	0.092	0.069	0.075	0.08	0.085	0.09	0.103	0.084	0.099	0.142	0.083	0.039	0.019	0.046	0.048	0.102	0.127	0.139	0.182	0.274	0.014	0.01
4155	Form_5104	APOB	vtgb1.L	gnl|gene50141|XL-9_2-gene50141|rna96457|	269	60.6	TLAETKSNRVSES	K.SNRVSESQVQLTK.R	Apolipoprotein B-100						0.125	0.075	0.111	0.094	0.117	0.133	0.111	0.107	0.112	0.002	0.012	0.092	0.069	0.075	0.08	0.085	0.09	0.103	0.084	0.099	0.142	0.083	0.132	0.059	0.095	0.086	0.114	0.137	0.131	0.103	0.127	0.004	0.011
4156	Form_5097	APOB	vtgb1.L	gnl|gene50141|XL-9_2-gene50141|rna96457|	959	48.5	TSAESASMMEVSS	R.TSAESASMMEVSSEMGIR.N	Apolipoprotein B-100						0.102	0.047	0.072	0.075	0.075	0.106	0.13	0.196	0.143	0.022	0.032	0.092	0.069	0.075	0.08	0.085	0.09	0.103	0.084	0.099	0.142	0.083	0.105	0.036	0.06	0.067	0.071	0.106	0.149	0.183	0.158	0.035	0.03
4156	Form_5098	APOB	vtgb1.L	gnl|gene50141|XL-9_2-gene50141|rna96457|	964	31.8	ASMMEVSSEMGIR	R.TSAESASMMEVSSEMGIR.N	Apolipoprotein B-100						0.131	0.052	0.056	0.084	0.077	0.122	0.148	0.161	0.155	0.004	0.01	0.092	0.069	0.075	0.08	0.085	0.09	0.103	0.084	0.099	0.142	0.083	0.134	0.04	0.047	0.075	0.073	0.122	0.17	0.151	0.171	0.007	0.009
4156	Form_5099	APOB	vtgb1.L	gnl|gene50141|XL-9_2-gene50141|rna96457|	957	66.1	GRTSAESASMMEV	R.TSAESASMMEVSSEMGIR.N	Apolipoprotein B-100						0.094	0.029	0.06	0.063	0.062	0.095	0.155	0.254	0.169	0.006	0.013	0.092	0.069	0.075	0.08	0.085	0.09	0.103	0.084	0.099	0.142	0.083	0.096	0.022	0.05	0.056	0.059	0.095	0.178	0.238	0.186	0.01	0.012
4156	Form_5100	APOB	vtgb1.L	gnl|gene50141|XL-9_2-gene50141|rna96457|	954	31.8	EKSGRTSAESASM	R.TSAESASMMEVSSEMGIR.N	Apolipoprotein B-100						0.08	0.016	0.05	0.052	0.065	0.095	0.168	0.278	0.181	0.006	0.01	0.092	0.069	0.075	0.08	0.085	0.09	0.103	0.084	0.099	0.142	0.083	0.081	0.012	0.041	0.046	0.061	0.094	0.191	0.258	0.198	0.009	0.009
4157	Form_5103	APOB	vtgb1.L	gnl|gene50141|XL-9_2-gene50141|rna96457|	1115	5000	TKDAGETDVLEAE	K.DAGETDVLEAERK.W	Apolipoprotein B-100						0.142	0.083	0.116	0.111	0.122	0.121	0.09	0.095	0.105	0.005	0.01	0.092	0.069	0.075	0.08	0.085	0.09	0.103	0.084	0.099	0.142	0.083	0.151	0.066	0.1	0.102	0.119	0.125	0.107	0.092	0.12	0.008	0.01
1482	Form_1817	APOO	apoo.L	gnl|gene17075|XL-9_2-gene17075|rna49879|	203	26.8	EVTSGPSLTSDTV	K.REVTSGPSLTSDTVSTEETSQK.G	MICOS complex subunit MIC26						0.02	0.006	0.036	0.059	0.092	0.109	0.113	0.191	0.193	0.134	0.048	0.095	0.095	0.104	0.104	0.096	0.1	0.09	0.086	0.088	0.068	0.075	0.021	0.006	0.042	0.07	0.1	0.124	0.115	0.186	0.192	0.103	0.041
1482	Form_1818	APOO	apoo.L	gnl|gene17075|XL-9_2-gene17075|rna49879|	211	31.1	TSDTVSTEETSQK	K.REVTSGPSLTSDTVSTEETSQK.G	MICOS complex subunit MIC26						0.023	0.021	0.042	0.056	0.087	0.104	0.103	0.167	0.187	0.155	0.055	0.095	0.095	0.104	0.104	0.096	0.1	0.09	0.086	0.088	0.068	0.075	0.025	0.023	0.05	0.066	0.095	0.118	0.106	0.163	0.187	0.12	0.047
1482	Form_1819	APOO	apoo.L	gnl|gene17075|XL-9_2-gene17075|rna49879|	210	17.7	LTSDTVSTEETSQ	K.REVTSGPSLTSDTVSTEETSQK.G	MICOS complex subunit MIC26						0.027	0.015	0.058	0.057	0.128	0.107	0.137	0.19	0.256	0.012	0.011	0.095	0.095	0.104	0.104	0.096	0.1	0.09	0.086	0.088	0.068	0.075	0.028	0.016	0.066	0.065	0.134	0.116	0.134	0.178	0.245	0.009	0.009
3801	Form_4674	APOOL	apool.L	gnl|gene46440|XL-9_2-gene46440|rna91213|	221	81.5	KLIQDQTNITKDE	K.LIQDQTNITK.D	MICOS complex subunit						0.052	0.038	0.12	0.099	0.099	0.128	0.111	0.113	0.148	0.053	0.04	0.096	0.103	0.089	0.095	0.103	0.093	0.086	0.087	0.084	0.082	0.082	0.055	0.043	0.118	0.104	0.113	0.131	0.105	0.108	0.137	0.048	0.036
3802	Form_4672	APOOL	apool.L	gnl|gene46440|XL-9_2-gene46440|rna91213|	271	35.8	ATVPSDSENDQKF	K.PATVPSDSENDQK.F	MICOS complex subunit						0.071	0.052	0.115	0.132	0.107	0.167	0.104	0.132	0.113	0.002	0.007	0.096	0.103	0.089	0.095	0.103	0.093	0.086	0.087	0.084	0.082	0.082	0.074	0.058	0.111	0.136	0.12	0.169	0.097	0.125	0.103	0.002	0.006
3802	Form_4673	APOOL	apool.L	gnl|gene46440|XL-9_2-gene46440|rna91213|	269	41.4	KPATVPSDSENDQ	K.PATVPSDSENDQK.F	MICOS complex subunit						0.081	0.049	0.148	0.122	0.101	0.126	0.11	0.121	0.134	0.001	0.007	0.096	0.103	0.089	0.095	0.103	0.093	0.086	0.087	0.084	0.082	0.082	0.085	0.055	0.144	0.126	0.114	0.128	0.103	0.115	0.123	0.001	0.006
4583	Form_5622	APPL1	appl1.L	gnl|gene6725|XL-9_2-gene6725|rna19690|	399	59.2	SALEAVTPSPSFQ	R.VNQSALEAVTPSPSFQQR.H	DCC-interacting protein 13-alpha	GN:APPL1|APPL|human|Q9UKG1	0	399	SALEAVTPSPSFQ	NaN	0.016	0.012	0.16	0.182	0.105	0.163	0.09	0.113	0.124	0.017	0.017	0.085	0.087	0.082	0.085	0.085	0.082	0.096	0.104	0.099	0.096	0.098	0.015	0.012	0.147	0.173	0.1	0.15	0.097	0.132	0.138	0.018	0.019
1696	Form_2083	APTX	aptx.L	gnl|gene18206|XL-9_2-gene18206|rna53192|	121	78.3	RSSSKRTPENSLN	K.RTPENSLNVDTETPRK.L	Aprataxin						0.023	0.011	0.03	0.024	0.049	0.044	0.079	0.088	0.196	0.203	0.253	0.111	0.123	0.086	0.099	0.125	0.113	0.056	0.058	0.064	0.094	0.071	0.033	0.017	0.033	0.03	0.077	0.063	0.056	0.065	0.159	0.242	0.228
1697	Form_2084	APTX	aptx.L	gnl|gene18206|XL-9_2-gene18206|rna53192|	144	20.3	KKESNVSPSSSSG	K.ESNVSPSSSSGK.I	Aprataxin						0.025	0.024	0.127	0.046	0.081	0.076	0.157	0.149	0.196	0.027	0.092	0.111	0.123	0.086	0.099	0.125	0.113	0.056	0.058	0.064	0.094	0.071	0.035	0.038	0.138	0.058	0.128	0.108	0.111	0.109	0.159	0.032	0.083
52	Form___78	ARAF	araf.S	gnl|gene10178|XL-9_2-gene10178|rna29594|	251	133.2	VDGPPKSAQPLGS	K.SAQPLGSK.S	Serine/threonine-protein kinase A-Raf						0.003	0.053	0.355	0.165	0.13	0.101	0.08	0.064	0.045	0.001	0.003	0.104	0.094	0.089	0.093	0.086	0.096	0.091	0.086	0.089	0.087	0.085	0.004	0.055	0.35	0.17	0.124	0.107	0.081	0.061	0.044	0.001	0.003
1837	Form_2261	ARCN1	arcn1.L	gnl|gene18790|XL-9_2-gene18790|rna54847|	257	20.6	TIVTPSSGKRQSE	K.SEGETIVTPSSGK.R	Coatomer subunit delta						0.036	0.037	0.143	0.134	0.164	0.127	0.131	0.099	0.126	0.001	0.001	0.088	0.084	0.088	0.08	0.082	0.084	0.086	0.087	0.08	0.123	0.118	0.038	0.037	0.15	0.128	0.16	0.127	0.134	0.103	0.12	0.001	0.002
1837	Form_2262	ARCN1	arcn1.L	gnl|gene18790|XL-9_2-gene18790|rna54847|	254;257	53.3	EGETIVTPSSGKR;TIVTPSSGKRQSE	K.SEGETIVTPSSGK.R	Coatomer subunit delta						0.013	0.026	0.14	0.213	0.172	0.155	0.115	0.087	0.07	0.004	0.004	0.088	0.084	0.088	0.08	0.082	0.084	0.086	0.087	0.08	0.123	0.118	0.014	0.026	0.147	0.203	0.168	0.155	0.118	0.09	0.067	0.006	0.006
1837	Form_2263	ARCN1	arcn1.L	gnl|gene18790|XL-9_2-gene18790|rna54847|	254	53.3	EGETIVTPSSGKR	K.SEGETIVTPSSGK.R	Coatomer subunit delta						0.022	0.044	0.124	0.234	0.123	0.2	0.084	0.095	0.052	0.006	0.016	0.088	0.084	0.088	0.08	0.082	0.084	0.086	0.087	0.08	0.123	0.118	0.023	0.044	0.129	0.222	0.119	0.199	0.086	0.098	0.049	0.009	0.022
1107	Form_1370	ARFGAP3	arfgap3.S	gnl|gene15138|XL-9_2-gene15138|rna44186|	198	31.5	VDYLSMSPKASLA	K.EAGEPDVGPSVDYLSMSPK.A	ADP-ribosylation factor GTPase-activating protein 3						0.094	0.07	0.117	0.125	0.122	0.143	0.099	0.106	0.106	0.006	0.011	0.085	0.087	0.096	0.102	0.098	0.102	0.085	0.09	0.081	0.087	0.086	0.086	0.066	0.121	0.138	0.129	0.157	0.091	0.103	0.093	0.006	0.01
1108	Form_1372	ARFGAP3	arfgap3.S	gnl|gene15138|XL-9_2-gene15138|rna44186|	404	45.6	SADPDVSLTSKTT	K.TSADPDVSLTSK.T	ADP-ribosylation factor GTPase-activating protein 3						0.006	0.014	0.14	0.164	0.116	0.18	0.11	0.148	0.111	0.004	0.008	0.085	0.087	0.096	0.102	0.098	0.102	0.085	0.09	0.081	0.087	0.086	0.005	0.013	0.142	0.177	0.121	0.195	0.099	0.141	0.095	0.004	0.007
1109	Form_1371	ARFGAP3	arfgap3.S	gnl|gene15138|XL-9_2-gene15138|rna44186|	467	29.7	SRLERLSGNSSIS	R.LSGNSSISSADLFDEHK.K	ADP-ribosylation factor GTPase-activating protein 3	GN:ARFGAP3|ARF_GAP_3|human|Q9NP61	0	451	ARLERLSASSSIS	NaN	0.009	0.004	0.093	0.138	0.15	0.168	0.135	0.157	0.134	0.005	0.007	0.085	0.087	0.096	0.102	0.098	0.102	0.085	0.09	0.081	0.087	0.086	0.008	0.004	0.096	0.151	0.157	0.183	0.123	0.151	0.116	0.005	0.006
1379	Form_1698	ARFGAP3	arfgap3.L	gnl|gene16500|XL-9_2-gene16500|rna48206|	397	48.2	KTDPDVSIHSKTS	K.TDPDVSIHSK.T	ADP-ribosylation factor GTPase-activating protein 3						0.004	0.004	0.124	0.108	0.126	0.13	0.15	0.151	0.184	0.007	0.013	0.101	0.103	0.101	0.094	0.107	0.105	0.079	0.082	0.089	0.069	0.07	0.004	0.004	0.135	0.11	0.146	0.148	0.128	0.134	0.177	0.005	0.01
1380	Form_1699	ARFGAP3	arfgap3.L	gnl|gene16500|XL-9_2-gene16500|rna48206|	421	42.7	HEVEPVSDTDDAQ	K.HEVEPVSDTDDAQK.K	ADP-ribosylation factor GTPase-activating protein 3						0.086	0.038	0.157	0.123	0.122	0.113	0.127	0.103	0.12	0.004	0.005	0.101	0.103	0.101	0.094	0.107	0.105	0.079	0.082	0.089	0.069	0.07	0.092	0.041	0.167	0.122	0.138	0.125	0.106	0.089	0.113	0.003	0.004
3581	Form_4396	ARFGEF1	LOC108695329	gnl|gene44324|XL-9_2-gene44324|rna88156|	353;362	101.3	DTSDGDSIHANGI;ANGIPGTPKSMAY	K.RISEDTSDGDSIHANGIPGTPK.S	Brefeldin A-inhibited guanine nucleotide-exchange protein 1	GN:ARFGEF1|ARFGEF1|human|Q9Y6D6	0	378	ANGIPGTPISVAY	NaN	0.028	0.015	0.106	0.126	0.117	0.157	0.135	0.161	0.133	0.008	0.014	0.094	0.09	0.093	0.094	0.094	0.094	0.088	0.086	0.087	0.09	0.09	0.029	0.015	0.109	0.13	0.121	0.163	0.131	0.152	0.127	0.008	0.014
3759	Form_4621	ARFGEF1	LOC108719284	gnl|gene46046|XL-9_2-gene46046|rna90653|	1363	5000	DSVSQKSVDIHEC	K.SVDIHECIQPR.T	Brefeldin A-inhibited guanine nucleotide-exchange protein 1	GN:ARFGEF1|ARFGEF1|human|Q9Y6D6	0	1569	DTISQKSVDIHDS	NaN	0.119	0.078	0.124	0.132	0.127	0.112	0.101	0.103	0.096	0.003	0.004	0.107	0.114	0.106	0.087	0.082	0.1	0.082	0.08	0.072	0.085	0.086	0.138	0.097	0.143	0.125	0.113	0.122	0.09	0.09	0.075	0.003	0.004
3049	Form_3744	ARFIP1	arfip1.L	gnl|gene39371|XL-9_2-gene39371|rna80928|	391	72.1	PGVDAPSWLEEQx	K.TPGVDAPSWLEEQ.-	Arfaptin-1						0.063	0.05	0.147	0.138	0.117	0.117	0.119	0.13	0.1	0.006	0.011	0.096	0.084	0.084	0.098	0.106	0.1	0.085	0.083	0.094	0.089	0.082	0.066	0.046	0.134	0.147	0.135	0.127	0.11	0.117	0.102	0.006	0.01
3049	Form_3745	ARFIP1	arfip1.L	gnl|gene39371|XL-9_2-gene39371|rna80928|	384	80.8	FHVKLKTPGVDAP	K.LKTPGVDAPSWLEEQ.-	Arfaptin-1						0.029	0.026	0.15	0.114	0.11	0.124	0.133	0.132	0.105	0.03	0.046	0.096	0.084	0.084	0.098	0.106	0.1	0.085	0.083	0.094	0.089	0.082	0.03	0.024	0.138	0.122	0.128	0.136	0.124	0.12	0.108	0.029	0.041
1674	Form_2057	ARHGAP11A	arhgap11a.2.S	gnl|gene18060|XL-9_2-gene18060|rna52789|	255	14.4	AEEESVTPSGGVN	K.IPLAHDAEEESVTPSGGVNR.R	Rho GTPase-activating protein 11A						0.138	0.086	0.168	0.137	0.09	0.081	0.096	0.077	0.085	0.012	0.029	0.052	0.049	0.065	0.066	0.103	0.116	0.094	0.103	0.139	0.142	0.073	0.087	0.051	0.132	0.109	0.112	0.114	0.109	0.096	0.142	0.021	0.026
1675	Form_2056	ARHGAP11A	arhgap11a.2.S	gnl|gene18060|XL-9_2-gene18060|rna52789|	381;384	106.2	SPAIPATPESAPR;IPATPESAPRGQR	K.LSTGSPAIPATPESAPR.G	Rho GTPase-activating protein 11A						0.029	0.029	0.152	0.135	0.119	0.108	0.135	0.142	0.139	0.003	0.009	0.052	0.049	0.065	0.066	0.103	0.116	0.094	0.103	0.139	0.142	0.073	0.016	0.015	0.105	0.095	0.13	0.133	0.135	0.155	0.205	0.005	0.007
5196	Form_6365	ARHGAP12	arhgap12.S	gnl|gene9644|XL-9_2-gene9644|rna28069|	424;428	105.8	TSKPDETPPPSPK;DETPPPSPKQQAT	K.DSSATSKPDETPPPSPK.Q	Rho GTPase-activating protein 12						0.041	0.054	0.146	0.122	0.123	0.115	0.105	0.102	0.131	0.025	0.036	0.086	0.093	0.084	0.088	0.097	0.091	0.094	0.098	0.088	0.093	0.089	0.039	0.055	0.135	0.118	0.131	0.115	0.108	0.11	0.127	0.026	0.035
5197	Form_6364	ARHGAP12	arhgap12.S	gnl|gene9644|XL-9_2-gene9644|rna28069|	562	126.7	DDNVPESPVDKHA	R.DSEEACDDNVPESPVDK.H	Rho GTPase-activating protein 12						0.03	0.049	0.138	0.139	0.135	0.15	0.099	0.117	0.13	0.005	0.008	0.086	0.093	0.084	0.088	0.097	0.091	0.094	0.098	0.088	0.093	0.089	0.028	0.05	0.127	0.134	0.144	0.15	0.102	0.126	0.126	0.005	0.008
802	Form__987	ARHGAP17	arhgap17.S	gnl|gene13699|XL-9_2-gene13699|rna39851|	613	38.6	QGTANPSPLSSRR	R.NGTHQPSGGGNATAPVQGTANPSPLSSR.R	Rho GTPase-activating protein 17						0.048	0.046	0.114	0.116	0.111	0.102	0.083	0.104	0.112	0.066	0.097	0.076	0.076	0.107	0.086	0.107	0.099	0.1	0.091	0.107	0.072	0.08	0.039	0.037	0.13	0.106	0.127	0.108	0.089	0.101	0.128	0.051	0.083
2782	Form_3421	ARHGAP17	LOC108701645	gnl|gene36461|XL-9_2-gene36461|rna76812|	613	36	QGTANPSPLSSRR	R.NGTHQPSGGGNAMAPAQGTANPSPLSSR.R	Rho GTPase-activating protein 17						0.026	0.052	0.1	0.135	0.124	0.127	0.098	0.096	0.096	0.047	0.098	0.092	0.081	0.095	0.088	0.094	0.092	0.095	0.091	0.099	0.083	0.09	0.026	0.046	0.104	0.13	0.127	0.128	0.102	0.095	0.104	0.043	0.096
2836	Form_3494	ARHGAP18	arhgap18.L	gnl|gene37013|XL-9_2-gene37013|rna77594|	35	77.1	TNSAEVSPRSRKS	K.ATNSAEVSPR.S	Rho GTPase-activating protein 18						0.073	0.07	0.114	0.108	0.116	0.119	0.119	0.124	0.131	0.011	0.016	0.099	0.095	0.106	0.102	0.105	0.103	0.084	0.082	0.081	0.071	0.071	0.077	0.071	0.129	0.117	0.129	0.13	0.106	0.108	0.113	0.008	0.012
3160	Form_3881	ARHGAP25	LOC108711550	gnl|gene40599|XL-9_2-gene40599|rna82673|	427	84.1	AAEEIVSPGAEQT	R.SSVGWDAAEEIVSPGAEQTK.R	Rho GTPase-activating protein 25						0.009	0.008	0.06	0.097	0.101	0.14	0.118	0.231	0.189	0.024	0.025	0.086	0.091	0.089	0.086	0.09	0.104	0.096	0.098	0.088	0.09	0.083	0.008	0.008	0.057	0.089	0.097	0.156	0.121	0.242	0.178	0.023	0.022
3161	Form_3882	ARHGAP25	LOC108711550	gnl|gene40599|XL-9_2-gene40599|rna82673|	509	33.7	SGEFWSSPSKQQT	K.GELFSGEFWSSPSK.Q	Rho GTPase-activating protein 25						0.053	0.07	0.11	0.106	0.118	0.094	0.147	0.142	0.145	0.005	0.01	0.086	0.091	0.089	0.086	0.09	0.104	0.096	0.098	0.088	0.09	0.083	0.049	0.069	0.106	0.099	0.115	0.106	0.153	0.151	0.138	0.005	0.009
1865	Form_2296	ARHGAP35	arhgap35.S	gnl|gene18945|XL-9_2-gene18945|rna55307|	1171	59.3	SSLSVGSDDELGP	R.SSLSVGSDDELGPIR.K	Rho GTPase-activating protein 35	GN:ARHGAP35|GRF-1|human|Q9NRY4	0	1179	TSFSVGSDDELGP	NaN	0.223	0.115	0.128	0.114	0.095	0.098	0.071	0.078	0.071	0.002	0.004	0.068	0.09	0.081	0.084	0.085	0.086	0.092	0.1	0.104	0.111	0.099	0.18	0.123	0.123	0.114	0.096	0.1	0.077	0.092	0.088	0.003	0.005
2911	Form_3583	ARHGAP35	arhgap35.L	gnl|gene37869|XL-9_2-gene37869|rna78748|	1128;1130	43.6	NGSGNGSDSDMDT;SGNGSDSDMDTNS	R.NTNKPQSNGSGNGSDSDMDTNSLER.A	Rho GTPase-activating protein 35	GN:ARHGAP35|GRF-1|human|Q9NRY4	0;0	1134;1136	NGSGNGSDSEMDT;SGNGSDSEMDTSS	NaN;NaN	0.254	0.138	0.19	0.123	0.092	0.062	0.042	0.04	0.05	0.005	0.005	0.099	0.093	0.103	0.099	0.099	0.096	0.093	0.092	0.082	0.074	0.071	0.259	0.132	0.202	0.126	0.094	0.061	0.04	0.038	0.042	0.004	0.004
2912	Form_3584	ARHGAP35	arhgap35.L	gnl|gene37869|XL-9_2-gene37869|rna78748|	1168	33.6	FSSYRSSLSVGSD	R.SSLSVGSDDELGPIQR.K	Rho GTPase-activating protein 35						0.023	0.007	0.087	0.111	0.129	0.158	0.126	0.157	0.166	0.019	0.017	0.099	0.093	0.103	0.099	0.099	0.096	0.093	0.092	0.082	0.074	0.071	0.024	0.007	0.096	0.118	0.137	0.163	0.126	0.155	0.146	0.015	0.013
2912	Form_3585	ARHGAP35	arhgap35.L	gnl|gene37869|XL-9_2-gene37869|rna78748|	1167	24.9	KFSSYRSSLSVGS	R.SSLSVGSDDELGPIQR.K	Rho GTPase-activating protein 35						0.08	0.084	0.143	0.079	0.112	0.062	0.069	0.059	0.173	0.032	0.107	0.099	0.093	0.103	0.099	0.099	0.096	0.093	0.092	0.082	0.074	0.071	0.087	0.085	0.161	0.086	0.121	0.065	0.07	0.059	0.155	0.026	0.083
775	Form__959	ARHGAP5	arhgap5.S	gnl|gene13535|XL-9_2-gene13535|rna39392|	761;765	149.2	ESVKHNSDIASPA;HNSDIASPAPTIK	K.HNSDIASPAPTIK.E	Rho GTPase-activating protein 5						0.005	0.005	0.071	0.098	0.135	0.152	0.141	0.162	0.214	0.006	0.012	0.096	0.087	0.095	0.094	0.094	0.101	0.087	0.092	0.092	0.084	0.078	0.005	0.005	0.072	0.099	0.136	0.165	0.132	0.16	0.212	0.005	0.01
776	Form__958	ARHGAP5	arhgap5.S	gnl|gene13535|XL-9_2-gene13535|rna39392|	1168;1171	172.2	RYRRAHSDASDEE;RAHSDASDEEALT	R.AHSDASDEEALTAK.E	Rho GTPase-activating protein 5	GN:ARHGAP5|ARHGAP5|human|Q13017	0;0	1173;1176	YYRRTHSDASDDE;RTHSDASDDEAFT	NaN;NaN	0.082	0.068	0.116	0.124	0.11	0.134	0.113	0.129	0.114	0.004	0.007	0.096	0.087	0.095	0.094	0.094	0.101	0.087	0.092	0.092	0.084	0.078	0.084	0.063	0.118	0.125	0.111	0.145	0.105	0.127	0.113	0.004	0.006
777	Form__960	ARHGAP5	arhgap5.S	gnl|gene13535|XL-9_2-gene13535|rna39392|	1190;1197	165.4	KPKHRPSEEDPLL;EEDPLLSPVDSWK	K.HRPSEEDPLLSPVDSWK.G	Rho GTPase-activating protein 5	GN:ARHGAP5|ARHGAP5|human|Q13017	0;0	1195;1202	KGRHRGSEEDPLL;EEDPLLSPVETWK	NaN;NaN	0.005	0.006	0.038	0.08	0.1	0.085	0.211	0.224	0.228	0.008	0.016	0.096	0.087	0.095	0.094	0.094	0.101	0.087	0.092	0.092	0.084	0.078	0.005	0.006	0.039	0.082	0.102	0.093	0.2	0.224	0.228	0.007	0.014
2484	Form_3066	ARHGAP5	arhgap5.L	gnl|gene3241|XL-9_2-gene3241|rna9388|	1081	22.4	LEDLDPSDNYAEP	R.THLEDLDPSDNYAEPVDTIHK.P	Rho GTPase-activating protein 5	GN:ARHGAP5|ARHGAP5|human|Q13017	0	1088	PEDMDPSDNYAEP	NaN	0.01	0.011	0.243	0.177	0.106	0.148	0.099	0.114	0.075	0.006	0.011	0.108	0.08	0.074	0.1	0.096	0.099	0.093	0.077	0.087	0.088	0.098	0.012	0.01	0.203	0.2	0.115	0.165	0.104	0.099	0.074	0.006	0.012
2485	Form_3067	ARHGAP5	arhgap5.L	gnl|gene3241|XL-9_2-gene3241|rna9388|	1210	50.9	DNPAITSDQEQEE	K.GGIDNPAITSDQEQEER.K	Rho GTPase-activating protein 5	GN:ARHGAP5|ARHGAP5|human|Q13017	0	1218	DNPAITSDQELDD	NaN	0.075	0.066	0.152	0.106	0.13	0.105	0.112	0.123	0.125	0.003	0.003	0.108	0.08	0.074	0.1	0.096	0.099	0.093	0.077	0.087	0.088	0.098	0.091	0.059	0.126	0.118	0.14	0.116	0.116	0.106	0.122	0.003	0.003
1283	Form_1586	ARHGEF10	arhgef10.L	gnl|gene16144|XL-9_2-gene16144|rna47192|	48	5000	EKFDFDSGDEIPE	K.FDFDSGDEIPEADR.Q	Rho guanine nucleotide exchange factor 10	GN:ARHGEF10|ARHGEF10|human|O15013	0	59	EQFDFDSGDEIPE	NaN	0.108	0.067	0.118	0.097	0.11	0.124	0.122	0.118	0.121	0.005	0.011	0.099	0.102	0.099	0.105	0.103	0.107	0.079	0.082	0.073	0.074	0.078	0.115	0.073	0.125	0.109	0.121	0.142	0.103	0.104	0.095	0.004	0.009
1284	Form_1587	ARHGEF10	arhgef10.L	gnl|gene16144|XL-9_2-gene16144|rna47192|	385	5000	SYIKTKSFVLHDR	K.SFVLHDR.K	Rho guanine nucleotide exchange factor 10						0.022	0.02	0.176	0.135	0.133	0.119	0.14	0.104	0.138	0.008	0.007	0.099	0.102	0.099	0.105	0.103	0.107	0.079	0.082	0.073	0.074	0.078	0.023	0.022	0.187	0.152	0.147	0.137	0.119	0.092	0.108	0.006	0.006
1285	Form_1584	ARHGEF10	arhgef10.L	gnl|gene16144|XL-9_2-gene16144|rna47192|	691	17.7	TANARSSVEGSSA	R.SSVEGSSAVTTNQK.Y	Rho guanine nucleotide exchange factor 10						0.005	0.005	0.062	0.086	0.125	0.128	0.17	0.199	0.211	0.002	0.007	0.099	0.102	0.099	0.105	0.103	0.107	0.079	0.082	0.073	0.074	0.078	0.006	0.006	0.069	0.102	0.145	0.155	0.152	0.184	0.174	0.002	0.006
1286	Form_1585	ARHGEF10	arhgef10.L	gnl|gene16144|XL-9_2-gene16144|rna47192|	1251	76.2	ELKNEDSQCTGVQ	K.NEDSQCTGVQK.T	Rho guanine nucleotide exchange factor 10						0.003	0.004	0.15	0.096	0.133	0.103	0.173	0.128	0.201	0.001	0.009	0.099	0.102	0.099	0.105	0.103	0.107	0.079	0.082	0.073	0.074	0.078	0.003	0.004	0.165	0.112	0.152	0.123	0.152	0.117	0.163	0.001	0.008
2982	Form_3665	ARHGEF12	arhgef12.S	gnl|gene38661|XL-9_2-gene38661|rna79897|	304;309	5000	SGQRDKSFLEESL;KSFLEESLEKSEI	K.SFLEESLEK.S	Rho guanine nucleotide exchange factor 12						0.008	0.009	0.13	0.13	0.114	0.163	0.128	0.171	0.138	0.006	0.003	0.094	0.092	0.098	0.101	0.101	0.1	0.084	0.079	0.092	0.076	0.083	0.008	0.009	0.137	0.141	0.124	0.175	0.116	0.145	0.137	0.005	0.003
2982	Form_3666	ARHGEF12	arhgef12.S	gnl|gene38661|XL-9_2-gene38661|rna79897|	304	5000	SGQRDKSFLEESL	K.SFLEESLEK.S	Rho guanine nucleotide exchange factor 12						0.035	0.061	0.196	0.125	0.113	0.1	0.123	0.123	0.101	0.014	0.01	0.094	0.092	0.098	0.101	0.101	0.1	0.084	0.079	0.092	0.076	0.083	0.035	0.06	0.206	0.135	0.122	0.107	0.111	0.104	0.1	0.011	0.009
3083	Form_3785	ARHGEF12	LOC108696425	gnl|gene39679|XL-9_2-gene39679|rna81352|	22	81.7	KPTRHGSILYRES	R.HGSILYR.E	Rho guanine nucleotide exchange factor 12	GN:ARHGEF12|ARHGEF12|human|Q9NZN5	0	22	KPIRHGSILNRES	NaN	0.031	0.031	0.113	0.109	0.17	0.117	0.141	0.126	0.148	0.007	0.007	0.087	0.097	0.1	0.104	0.084	0.103	0.095	0.1	0.087	0.07	0.072	0.029	0.032	0.12	0.12	0.151	0.128	0.142	0.133	0.136	0.005	0.005
2181	Form_2667	ARHGEF16	arhgef16.L	gnl|gene2157|XL-9_2-gene2157|rna6258|	568	39.1	NGDQPLTPTAKTA	K.LENGDQPLTPTAK.T	Rho guanine nucleotide exchange factor 16						0.014	0.023	0.135	0.132	0.145	0.135	0.11	0.114	0.127	0.035	0.031	0.089	0.085	0.108	0.092	0.094	0.096	0.101	0.086	0.083	0.074	0.092	0.013	0.021	0.156	0.13	0.146	0.139	0.119	0.105	0.113	0.028	0.031
2182	Form_2668	ARHGEF16	arhgef16.L	gnl|gene2157|XL-9_2-gene2157|rna6258|	580	20.8	ATSGPRSPNGPFL	K.TATSGPRSPNGPFLFQIK.I	Rho guanine nucleotide exchange factor 16						0.012	0.019	0.031	0.056	0.077	0.093	0.108	0.166	0.233	0.116	0.089	0.089	0.085	0.108	0.092	0.094	0.096	0.101	0.086	0.083	0.074	0.092	0.012	0.018	0.038	0.058	0.082	0.101	0.123	0.161	0.218	0.097	0.092
853	Form_1048	ARHGEF19	LOC108697842	gnl|gene13948|XL-9_2-gene13948|rna40609|	86	15.9	KRSCTTSPPPIEV	K.RSCTTSPPPIEVTVK.R	Rho guanine nucleotide exchange factor 19						0.042	0.052	0.191	0.128	0.127	0.12	0.09	0.075	0.139	0.007	0.029	0.048	0.042	0.049	0.055	0.078	0.074	0.091	0.123	0.116	0.189	0.135	0.026	0.028	0.12	0.09	0.127	0.114	0.105	0.118	0.207	0.016	0.05
3172	Form_3903	ARID1A	LOC108708921	gnl|gene40701|XL-9_2-gene40701|rna82823|	210	80.2	GVHPPGSPGSSVQ	R.GVHPPGSPGSSVQGLPR.T	AT-rich interactive domain-containing protein 1A						0.106	0.088	0.125	0.137	0.11	0.125	0.097	0.078	0.076	0.015	0.044	0.09	0.09	0.1	0.089	0.093	0.094	0.092	0.093	0.088	0.089	0.082	0.104	0.086	0.136	0.133	0.111	0.128	0.097	0.079	0.073	0.015	0.039
3173	Form_3899	ARID1A	LOC108708921	gnl|gene40701|XL-9_2-gene40701|rna82823|	519;525	125.8	PGIRGPSPSPVGS;SPSPVGSPASVAP	R.GPSPSPVGSPASVAPSR.S	AT-rich interactive domain-containing protein 1A						0.103	0.075	0.123	0.126	0.119	0.111	0.089	0.086	0.098	0.022	0.048	0.09	0.09	0.1	0.089	0.093	0.094	0.092	0.093	0.088	0.089	0.082	0.101	0.074	0.134	0.122	0.121	0.114	0.089	0.087	0.094	0.021	0.043
3173	Form_3901	ARID1A	LOC108708921	gnl|gene40701|XL-9_2-gene40701|rna82823|	519	125.8	PGIRGPSPSPVGS	R.GPSPSPVGSPASVAPSR.S	AT-rich interactive domain-containing protein 1A						0.082	0.046	0.033	0.031	0.053	0.054	0.047	0.048	0.073	0.137	0.397	0.09	0.09	0.1	0.089	0.093	0.094	0.092	0.093	0.088	0.089	0.082	0.084	0.047	0.038	0.032	0.056	0.058	0.049	0.051	0.073	0.139	0.372
3173	Form_3904	ARID1A	LOC108708921	gnl|gene40701|XL-9_2-gene40701|rna82823|	519;521;525	125.8	PGIRGPSPSPVGS;IRGPSPSPVGSPA;SPSPVGSPASVAP	R.GPSPSPVGSPASVAPSR.S	AT-rich interactive domain-containing protein 1A	GN:ARID1A|ARID1A|human|O14497	0	696	PGIRGPSPSPVGS	1	0.052	0.073	0.11	0.154	0.12	0.151	0.096	0.127	0.105	0.004	0.007	0.09	0.09	0.1	0.089	0.093	0.094	0.092	0.093	0.088	0.089	0.082	0.051	0.071	0.119	0.148	0.121	0.154	0.096	0.128	0.1	0.004	0.006
3174	Form_3898	ARID1A	LOC108708921	gnl|gene40701|XL-9_2-gene40701|rna82823|	595	141.8	QPGPALSPRQSTA	R.NAPIPQYGSPQPGPALSPR.Q	AT-rich interactive domain-containing protein 1A						0.093	0.08	0.093	0.106	0.114	0.118	0.114	0.116	0.116	0.018	0.032	0.09	0.09	0.1	0.089	0.093	0.094	0.092	0.093	0.088	0.089	0.082	0.091	0.078	0.101	0.103	0.116	0.121	0.114	0.118	0.111	0.017	0.029
3174	Form_3902	ARID1A	LOC108708921	gnl|gene40701|XL-9_2-gene40701|rna82823|	587;595	141.8	PIPQYGSPQPGPA;QPGPALSPRQSTA	R.NAPIPQYGSPQPGPALSPR.Q	AT-rich interactive domain-containing protein 1A						0.096	0.078	0.156	0.157	0.12	0.127	0.098	0.073	0.068	0.01	0.016	0.09	0.09	0.1	0.089	0.093	0.094	0.092	0.093	0.088	0.089	0.082	0.094	0.076	0.169	0.151	0.121	0.129	0.098	0.074	0.065	0.01	0.014
3175	Form_3897	ARID1A	LOC108708921	gnl|gene40701|XL-9_2-gene40701|rna82823|	994	68.2	PGMRNNSVGLQEA	R.NNSVGLQEAYDGSDPSYQK.R	AT-rich interactive domain-containing protein 1A						0.003	0.009	0.143	0.2	0.127	0.155	0.106	0.127	0.114	0.007	0.007	0.09	0.09	0.1	0.089	0.093	0.094	0.092	0.093	0.088	0.089	0.082	0.003	0.009	0.155	0.193	0.128	0.158	0.106	0.128	0.109	0.007	0.006
3176	Form_3900	ARID1A	LOC108708921	gnl|gene40701|XL-9_2-gene40701|rna82823|	1584	30.2	AYNTPFSGNEDIQ	R.EAYNTPFSGNEDIQQQSSK.F	AT-rich interactive domain-containing protein 1A						0.097	0.062	0.108	0.098	0.115	0.12	0.11	0.125	0.15	0.007	0.008	0.09	0.09	0.1	0.089	0.093	0.094	0.092	0.093	0.088	0.089	0.082	0.095	0.061	0.117	0.095	0.116	0.123	0.11	0.126	0.143	0.007	0.007
3177	Form_3905	ARID1A	LOC108708921	gnl|gene40701|XL-9_2-gene40701|rna82823|	1709	64.9	KFSLGGSPPPRNR	K.FSLGGSPPPR.N	AT-rich interactive domain-containing protein 1A						0.082	0.062	0.091	0.113	0.119	0.122	0.11	0.115	0.12	0.023	0.044	0.09	0.09	0.1	0.089	0.093	0.094	0.092	0.093	0.088	0.089	0.082	0.081	0.061	0.099	0.11	0.121	0.125	0.11	0.117	0.115	0.022	0.039
3511	Form_4315	ARID1A	LOC108707477	gnl|gene43375|XL-9_2-gene43375|rna86750|	26	115.9	GPDLKKSPGDPPP	K.SPGDPPPPPNETQQEAPVTASNETDSTEAANGTR.A	AT-rich interactive domain-containing protein 1A						0.086	0.049	0.098	0.095	0.11	0.123	0.102	0.134	0.19	0.003	0.009	0.09	0.096	0.092	0.097	0.097	0.096	0.091	0.088	0.084	0.088	0.079	0.085	0.052	0.099	0.101	0.117	0.129	0.102	0.129	0.175	0.003	0.008
3512	Form_4317	ARID1A	LOC108707477	gnl|gene43375|XL-9_2-gene43375|rna86750|	586;594	102	QIPQYGSPQPGPA;QPGPALSPRQSTA	R.NAQIPQYGSPQPGPALSPR.Q	AT-rich interactive domain-containing protein 1A	GN:ARID1A|ARID1A|human|O14497	0;0	764;772	QMPQYSSPQPGSA;QPGSALSPRQPSG	NaN;NaN	0.077	0.059	0.198	0.162	0.114	0.122	0.1	0.081	0.063	0.011	0.013	0.09	0.096	0.092	0.097	0.097	0.096	0.091	0.088	0.084	0.088	0.079	0.075	0.061	0.196	0.169	0.119	0.126	0.098	0.077	0.057	0.01	0.011
3513	Form_4316	ARID1A	LOC108707477	gnl|gene43375|XL-9_2-gene43375|rna86750|	1710	31.9	EFSLGRSPPPRNR	K.IGETTGEDCEFSLGRSPPPR.N	AT-rich interactive domain-containing protein 1A						0.083	0.05	0.078	0.07	0.086	0.094	0.142	0.139	0.15	0.042	0.066	0.09	0.096	0.092	0.097	0.097	0.096	0.091	0.088	0.084	0.088	0.079	0.083	0.053	0.08	0.075	0.093	0.1	0.143	0.136	0.14	0.041	0.058
4425	Form_5430	ARID3A	arid3a.L	gnl|gene5929|XL-9_2-gene5929|rna17355|	116	68.5	RYQDMASEEEDLK	R.YQDMASEEEDLK.G	AT-rich interactive domain-containing protein 3A						0.157	0.028	0.052	0.067	0.037	0.084	0.164	0.237	0.162	0.003	0.008	0.068	0.105	0.075	0.095	0.107	0.101	0.087	0.087	0.08	0.1	0.095	0.125	0.035	0.046	0.075	0.046	0.1	0.167	0.242	0.152	0.004	0.009
4426	Form_5431	ARID3A	arid3a.L	gnl|gene5929|XL-9_2-gene5929|rna17355|	541	62.8	PTSNNPSPxxxxx	R.TGSIGGGSSTSQPAPPPTSSAPTSNNPSP.-	AT-rich interactive domain-containing protein 3A						0.14	0.082	0.112	0.073	0.1	0.1	0.106	0.129	0.149	0.002	0.008	0.068	0.105	0.075	0.095	0.107	0.101	0.087	0.087	0.08	0.1	0.095	0.109	0.098	0.096	0.079	0.122	0.116	0.105	0.128	0.136	0.002	0.009
2864	Form_3530	ARID4A	LOC108698882	gnl|gene37367|XL-9_2-gene37367|rna78071|	505;514	88.7	EEDLNKTEENNEN;NNENESTPVRRSL	K.DIEEDLNKTEENNENESTPVRR.S	AT-rich interactive domain-containing protein 4A						0.012	0.01	0.072	0.085	0.086	0.091	0.115	0.123	0.175	0.085	0.147	0.055	0.06	0.082	0.086	0.108	0.13	0.108	0.111	0.099	0.093	0.067	0.007	0.006	0.061	0.076	0.096	0.122	0.128	0.141	0.179	0.082	0.102
2865	Form_3529	ARID4A	LOC108698882	gnl|gene37367|XL-9_2-gene37367|rna78071|	536;540	5000	TKKQDESERESDE;DESERESDEDDEN	K.QDESERESDEDDENPFEGK.E	AT-rich interactive domain-containing protein 4A						0.109	0.047	0.085	0.107	0.112	0.12	0.119	0.139	0.144	0.006	0.013	0.055	0.06	0.082	0.086	0.108	0.13	0.108	0.111	0.099	0.093	0.067	0.062	0.029	0.072	0.095	0.125	0.162	0.133	0.16	0.148	0.006	0.009
373	Form__482	ARL14EP	arl14ep.S	gnl|gene11705|XL-9_2-gene11705|rna34007|	119	27.3	QTKSATSNSGQTA	K.SATSNSGQTAASK.N	ARL14 effector protein						0.047	0.056	0.126	0.042	0.104	0.129	0.119	0.18	0.161	0.013	0.023	0.089	0.089	0.099	0.1	0.103	0.107	0.089	0.087	0.088	0.08	0.07	0.045	0.053	0.134	0.045	0.115	0.148	0.114	0.168	0.152	0.011	0.017
4531	Form_5556	ARMC9	armc9.L	gnl|gene6469|XL-9_2-gene6469|rna18926|	596	74	FDESVESDDEEEE	K.FDESVESDDEEEEK.D	LisH domain-containing protein ARMC9						0.093	0.079	0.12	0.115	0.113	0.118	0.115	0.125	0.11	0.004	0.006	0.101	0.077	0.091	0.093	0.098	0.096	0.092	0.094	0.103	0.077	0.076	0.1	0.065	0.116	0.114	0.118	0.121	0.113	0.125	0.121	0.003	0.005
4532	Form_5557	ARMC9	armc9.L	gnl|gene6469|XL-9_2-gene6469|rna18926|	686;688	57.2	VRKNSNSPSPLTN;KNSNSPSPLTNTF	K.NSNSPSPLTNTFK.S	LisH domain-containing protein ARMC9						0.039	0.045	0.231	0.136	0.105	0.113	0.106	0.105	0.071	0.019	0.031	0.101	0.077	0.091	0.093	0.098	0.096	0.092	0.094	0.103	0.077	0.076	0.042	0.037	0.227	0.136	0.111	0.117	0.105	0.106	0.079	0.016	0.025
4532	Form_5559	ARMC9	armc9.L	gnl|gene6469|XL-9_2-gene6469|rna18926|	684;686;688	90.9	NTVRKNSNSPSPL;VRKNSNSPSPLTN;KNSNSPSPLTNTF	K.NSNSPSPLTNTFK.S	LisH domain-containing protein ARMC9						0.025	0.026	0.076	0.107	0.118	0.147	0.12	0.175	0.187	0.006	0.013	0.101	0.077	0.091	0.093	0.098	0.096	0.092	0.094	0.103	0.077	0.076	0.027	0.021	0.073	0.104	0.121	0.148	0.116	0.173	0.202	0.005	0.01
4533	Form_5558	ARMC9	armc9.L	gnl|gene6469|XL-9_2-gene6469|rna18926|	771	148.3	KAWLPRSPEVQNA	R.SPEVQNATSR.K	LisH domain-containing protein ARMC9						0.036	0.043	0.138	0.134	0.147	0.155	0.108	0.116	0.096	0.01	0.017	0.101	0.077	0.091	0.093	0.098	0.096	0.092	0.094	0.103	0.077	0.076	0.039	0.035	0.134	0.133	0.153	0.159	0.106	0.116	0.105	0.008	0.014
659	Form__826	ARPP19	arpp19.L	gnl|gene13125|XL-9_2-gene13125|rna38151|	113	21.8	LPQRKPSLVASKL	K.TEVTGDHIPTPQDLPQRKPSLVASK.L	cAMP-regulated phosphoprotein 19	GN:ARPP19|ARPP-19|human|P56211	1	104	LPQRKPSLVASKL	NaN	0.049	0.055	0.064	0.093	0.101	0.127	0.112	0.136	0.149	0.061	0.054	0.094	0.087	0.1	0.085	0.099	0.089	0.08	0.075	0.077	0.106	0.11	0.052	0.054	0.073	0.09	0.114	0.128	0.102	0.116	0.13	0.073	0.067
3884	Form_4771	ASAP1	LOC108701073	gnl|gene47165|XL-9_2-gene47165|rna92201|	696	39	EDDMYESDDDLDE	R.LREDDMYESDDDLDEK.L	Arf-GAP with SH3 domain, ANK repeat and PH domain-containing protein 1 (Fragment)						0.108	0.091	0.113	0.124	0.127	0.121	0.094	0.123	0.092	0.003	0.005	0.095	0.092	0.1	0.093	0.089	0.093	0.087	0.077	0.093	0.095	0.086	0.113	0.092	0.124	0.127	0.125	0.124	0.09	0.104	0.094	0.003	0.005
2938	Form_3615	ASAP2	asap2.L	gnl|gene38208|XL-9_2-gene38208|rna79274|	701	5000	HVDLDESDDDVDE	R.LHHVDLDESDDDVDEK.M	Arf-GAP with SH3 domain, ANK repeat and PH domain-containing protein 2 (Fragment)	GN:ASAP2|DDEF2|human|O43150	0	701	HEDLDESDDDMDE	NaN	0.143	0.046	0.109	0.117	0.13	0.143	0.107	0.075	0.111	0.007	0.012	0.085	0.094	0.105	0.098	0.097	0.097	0.081	0.099	0.089	0.08	0.075	0.13	0.046	0.123	0.123	0.135	0.149	0.093	0.08	0.106	0.006	0.01
2846	Form_3505	ASCC2	ascc2.S	gnl|gene37179|XL-9_2-gene37179|rna77829|	421	17.8	VPPTQTSPKGATN	R.ASTVPPTQTSPK.G	Activating signal cointegrator 1 complex subunit 2						0.079	0.057	0.117	0.113	0.142	0.116	0.099	0.117	0.117	0.015	0.027	0.085	0.088	0.095	0.093	0.091	0.098	0.102	0.096	0.094	0.079	0.079	0.072	0.054	0.119	0.112	0.138	0.122	0.108	0.12	0.118	0.013	0.023
3743	Form_4603	ASH2L	ash2l.L	gnl|gene4575|XL-9_2-gene4575|rna13340|	19	18.3	GSGSGSSPGGSGG	K.DAGAGFGSGSGSSPGGSGGNGSGDTLQLTAGSLDPESSNEK.E	Set1/Ash2 histone methyltransferase complex subunit ASH2						0.099	0.036	0.058	0.065	0.056	0.065	0.181	0.15	0.151	0.038	0.102	0.078	0.084	0.096	0.096	0.093	0.104	0.095	0.099	0.104	0.078	0.073	0.083	0.033	0.06	0.067	0.056	0.073	0.186	0.16	0.169	0.032	0.08
3744	Form_4602	ASH2L	ash2l.L	gnl|gene4575|XL-9_2-gene4575|rna13340|	587	5000	EVDGRRSPPWEPx	R.RSPPWEP.-	Set1/Ash2 histone methyltransferase complex subunit ASH2	GN:ASH2L|ASH2L|human|Q9UBL3	1	623	EVDGRRSPPWEPx	NaN	0.106	0.06	0.087	0.094	0.111	0.096	0.089	0.1	0.103	0.054	0.1	0.078	0.084	0.096	0.096	0.093	0.104	0.095	0.099	0.104	0.078	0.073	0.09	0.055	0.091	0.098	0.113	0.109	0.092	0.108	0.117	0.046	0.08
879	Form_1079	ASMTL	asmtl.L	gnl|gene1407|XL-9_2-gene1407|rna4109|	251	114.3	ETFENLSDVEKDC	K.HDSIPYVETFENLSDVEK.D	Probable bifunctional dTTP/UTP pyrophosphatase/methyltransferase protein						0.108	0.022	0.08	0.065	0.088	0.08	0.133	0.211	0.195	0.012	0.007	0.097	0.093	0.096	0.112	0.099	0.113	0.09	0.073	0.074	0.066	0.086	0.119	0.023	0.087	0.082	0.098	0.102	0.135	0.174	0.163	0.009	0.007
879	Form_1080	ASMTL	asmtl.L	gnl|gene1407|XL-9_2-gene1407|rna4109|	240;251	114.3	NRIKHDSIPYVET;ETFENLSDVEKDC	K.HDSIPYVETFENLSDVEK.D	Probable bifunctional dTTP/UTP pyrophosphatase/methyltransferase protein						0.113	0.015	0.082	0.063	0.107	0.073	0.14	0.173	0.217	0.007	0.009	0.097	0.093	0.096	0.112	0.099	0.113	0.09	0.073	0.074	0.066	0.086	0.123	0.016	0.089	0.08	0.119	0.093	0.142	0.142	0.181	0.005	0.009
2177	Form_2663	ASPSCR1	aspscr1.S	gnl|gene2081|XL-9_2-gene2081|rna6040|	302	44.2	AQKLIHSPGPSKP	K.LIHSPGPSK.P	Tether containing UBX domain for GLUT4						0.041	0.064	0.116	0.154	0.107	0.147	0.1	0.149	0.097	0.013	0.012	0.096	0.098	0.094	0.085	0.089	0.089	0.089	0.085	0.084	0.093	0.099	0.044	0.071	0.122	0.147	0.107	0.147	0.1	0.142	0.092	0.014	0.013
2772	Form_3408	ATAD2	LOC108695434	gnl|gene36365|XL-9_2-gene36365|rna76667|	173	22.7	IRRSLYSTTNQSV	R.SLYSTTNQSVLFDK.L	ATPase family AAA domain-containing protein 2						0.005	0.018	0.151	0.124	0.155	0.143	0.131	0.118	0.144	0.004	0.006	0.083	0.09	0.088	0.09	0.09	0.091	0.092	0.086	0.084	0.109	0.096	0.005	0.018	0.15	0.126	0.157	0.146	0.136	0.114	0.136	0.005	0.007
757	Form__941	ATAD5	atad5.L	gnl|gene13456|XL-9_2-gene13456|rna39157|	84	23.8	AAIQQDTPQAAVA	K.AENAAIQQDTPQAAVADSSAASGKPSK.C	ATPase family AAA domain-containing protein 5						0.141	0.039	0.157	0.124	0.126	0.092	0.096	0.091	0.057	0.018	0.058	0.088	0.094	0.098	0.098	0.093	0.104	0.085	0.09	0.091	0.086	0.073	0.134	0.04	0.167	0.132	0.127	0.104	0.088	0.089	0.056	0.017	0.046
758	Form__940	ATAD5	atad5.L	gnl|gene13456|XL-9_2-gene13456|rna39157|	526	202.7	ETPALNSPVKGHS	R.LQTSETPALNSPVK.G	ATPase family AAA domain-containing protein 5						0.055	0.041	0.094	0.088	0.114	0.097	0.144	0.135	0.155	0.03	0.046	0.088	0.094	0.098	0.098	0.093	0.104	0.085	0.09	0.091	0.086	0.073	0.053	0.042	0.1	0.094	0.116	0.11	0.134	0.133	0.154	0.028	0.037
759	Form__942	ATAD5	atad5.L	gnl|gene13456|XL-9_2-gene13456|rna39157|	587;595	153.5	ASGKNKSLLADVL;LADVLSTPRSNKV	K.SLLADVLSTPR.S	ATPase family AAA domain-containing protein 5						0.009	0.009	0.084	0.061	0.093	0.11	0.194	0.209	0.213	0.002	0.015	0.088	0.094	0.098	0.098	0.093	0.104	0.085	0.09	0.091	0.086	0.073	0.009	0.009	0.09	0.065	0.094	0.125	0.18	0.205	0.211	0.002	0.012
760	Form__939	ATAD5	atad5.L	gnl|gene13456|XL-9_2-gene13456|rna39157|	676	5000	RKKRLRSVNDVLG	R.SVNDVLGK.R	ATPase family AAA domain-containing protein 5						0.008	0.023	0.094	0.089	0.144	0.126	0.157	0.145	0.188	0.01	0.017	0.088	0.094	0.098	0.098	0.093	0.104	0.085	0.09	0.091	0.086	0.073	0.008	0.023	0.099	0.094	0.144	0.141	0.144	0.141	0.185	0.009	0.013
1448	Form_1780	ATF7IP	atf7ip.S	gnl|gene16964|XL-9_2-gene16964|rna49567|	550	57.1	AEKSEVSPGEVSR	K.SEVSPGEVSR.R	Activating transcription factor 7-interacting protein 1						0.031	0.019	0.075	0.093	0.09	0.128	0.113	0.17	0.215	0.03	0.034	0.074	0.07	0.093	0.086	0.105	0.103	0.095	0.1	0.102	0.097	0.076	0.024	0.014	0.072	0.083	0.098	0.136	0.111	0.176	0.227	0.03	0.027
1449	Form_1781	ATF7IP	atf7ip.S	gnl|gene16964|XL-9_2-gene16964|rna49567|	562	29	RRKRSKSEDLDSE	R.SKSEDLDSESSK.R	Activating transcription factor 7-interacting protein 1	GN:ATF7IP|ATF7IP|human|Q6VMQ6	0	559	RRKRSKSEDMDNV	NaN	0.054	0.051	0.103	0.131	0.115	0.125	0.111	0.13	0.144	0.017	0.02	0.074	0.07	0.093	0.086	0.105	0.103	0.095	0.1	0.102	0.097	0.076	0.042	0.038	0.101	0.119	0.127	0.136	0.111	0.137	0.155	0.017	0.016
3215	Form_3950	ATF7IP2	atf7ip.L	gnl|gene4107|XL-9_2-gene4107|rna11962|	421	15.1	NEETSPSKQDSRE	K.ADLNSESVADNEEEMGGNEETSPSK.Q	Activating transcription factor 7-interacting protein 2						0.096	0.053	0.115	0.13	0.099	0.136	0.108	0.108	0.094	0.017	0.044	0.066	0.07	0.069	0.078	0.11	0.106	0.096	0.109	0.102	0.109	0.083	0.07	0.041	0.088	0.112	0.12	0.159	0.115	0.13	0.106	0.02	0.04
3215	Form_3956	ATF7IP2	atf7ip.L	gnl|gene4107|XL-9_2-gene4107|rna11962|	419	28.4	GGNEETSPSKQDS	K.ADLNSESVADNEEEMGGNEETSPSK.Q	Activating transcription factor 7-interacting protein 2						0.04	0.022	0.104	0.134	0.115	0.146	0.125	0.143	0.156	0.003	0.011	0.066	0.07	0.069	0.078	0.11	0.106	0.096	0.109	0.102	0.109	0.083	0.028	0.016	0.076	0.11	0.134	0.163	0.127	0.164	0.168	0.004	0.01
3216	Form_3952	ATF7IP2	atf7ip.L	gnl|gene4107|XL-9_2-gene4107|rna11962|	438;449	91.7	EAFLVLSDEEEPS;PSDERCSPVVEKT	R.ESLPSEAFLVLSDEEEPSDERCSPVVEK.T	Activating transcription factor 7-interacting protein 2						0.047	0.029	0.052	0.05	0.044	0.061	0.165	0.182	0.344	0.01	0.016	0.066	0.07	0.069	0.078	0.11	0.106	0.096	0.109	0.102	0.109	0.083	0.032	0.021	0.037	0.04	0.05	0.067	0.163	0.204	0.362	0.011	0.014
3216	Form_3957	ATF7IP2	atf7ip.L	gnl|gene4107|XL-9_2-gene4107|rna11962|	438	91.7	EAFLVLSDEEEPS	R.ESLPSEAFLVLSDEEEPSDER.C	Activating transcription factor 7-interacting protein 2						0.122	0.079	0.099	0.108	0.081	0.095	0.128	0.145	0.115	0.009	0.02	0.066	0.07	0.069	0.078	0.11	0.106	0.096	0.109	0.102	0.109	0.083	0.089	0.061	0.076	0.093	0.099	0.111	0.136	0.175	0.13	0.011	0.018
3216	Form_3958	ATF7IP2	atf7ip.L	gnl|gene4107|XL-9_2-gene4107|rna11962|	428;438	91.7	KQDSRESLPSEAF;EAFLVLSDEEEPS	K.QDSRESLPSEAFLVLSDEEEPSDER.C	Activating transcription factor 7-interacting protein 2						0.027	0.017	0.066	0.102	0.092	0.123	0.151	0.179	0.224	0.01	0.009	0.066	0.07	0.069	0.078	0.11	0.106	0.096	0.109	0.102	0.109	0.083	0.018	0.012	0.047	0.082	0.104	0.134	0.149	0.201	0.235	0.011	0.008
3217	Form_3954	ATF7IP2	atf7ip.L	gnl|gene4107|XL-9_2-gene4107|rna11962|	497	80.7	VSPGGVSPGDVSL	R.SDVSPGGVSPGDVSLGEVSR.R	Activating transcription factor 7-interacting protein 2						0.066	0.035	0.085	0.103	0.078	0.108	0.093	0.123	0.139	0.074	0.097	0.066	0.07	0.069	0.078	0.11	0.106	0.096	0.109	0.102	0.109	0.083	0.047	0.026	0.063	0.086	0.092	0.123	0.096	0.144	0.152	0.086	0.086
3217	Form_3959	ATF7IP2	atf7ip.L	gnl|gene4107|XL-9_2-gene4107|rna11962|	492	54.7	VERSDVSPGGVSP	R.SDVSPGGVSPGDVSLGEVSR.R	Activating transcription factor 7-interacting protein 2						0.134	0.049	0.097	0.091	0.08	0.083	0.086	0.102	0.125	0.061	0.092	0.066	0.07	0.069	0.078	0.11	0.106	0.096	0.109	0.102	0.109	0.083	0.098	0.038	0.074	0.079	0.098	0.098	0.092	0.123	0.142	0.074	0.085
3218	Form_3955	ATF7IP2	atf7ip.L	gnl|gene4107|XL-9_2-gene4107|rna11962|	514	32.6	RRKRSKSEDLDNE	R.SKSEDLDNESSK.R	Activating transcription factor 7-interacting protein 2						0.082	0.042	0.171	0.126	0.113	0.097	0.121	0.088	0.139	0.008	0.013	0.066	0.07	0.069	0.078	0.11	0.106	0.096	0.109	0.102	0.109	0.083	0.06	0.033	0.131	0.109	0.138	0.114	0.129	0.106	0.157	0.01	0.012
3219	Form_3951	ATF7IP2	atf7ip.L	gnl|gene4107|XL-9_2-gene4107|rna11962|	905	76.3	TTSQLKSPLSVFN	K.SPLSVFNSPSAAEATSSSR.E	Activating transcription factor 7-interacting protein 2						0.115	0.051	0.095	0.116	0.101	0.114	0.11	0.131	0.134	0.009	0.024	0.066	0.07	0.069	0.078	0.11	0.106	0.096	0.109	0.102	0.109	0.083	0.083	0.039	0.072	0.099	0.122	0.132	0.115	0.156	0.149	0.011	0.022
3219	Form_3953	ATF7IP2	atf7ip.L	gnl|gene4107|XL-9_2-gene4107|rna11962|	905;912	76.3	TTSQLKSPLSVFN;PLSVFNSPSAAEA	K.SPLSVFNSPSAAEATSSSR.E	Activating transcription factor 7-interacting protein 2						0.019	0.016	0.19	0.175	0.112	0.115	0.096	0.086	0.146	0.013	0.033	0.066	0.07	0.069	0.078	0.11	0.106	0.096	0.109	0.102	0.109	0.083	0.014	0.012	0.144	0.15	0.135	0.134	0.101	0.103	0.163	0.015	0.03
3999	Form_4911	ATF7IP2	LOC108701520	gnl|gene48389|XL-9_2-gene48389|rna93963|	127;132	35.5	SYEEAFSPSGASD;FSPSGASDKNHDH	R.VNTGGSYEEAFSPSGASDK.N	Activating transcription factor 7-interacting protein 2						0.034	0.03	0.06	0.094	0.11	0.137	0.15	0.18	0.184	0.007	0.014	0.065	0.07	0.082	0.074	0.093	0.106	0.08	0.102	0.119	0.104	0.106	0.023	0.022	0.052	0.073	0.107	0.152	0.126	0.192	0.229	0.008	0.016
3999	Form_4912	ATF7IP2	LOC108701520	gnl|gene48389|XL-9_2-gene48389|rna93963|	127	35.5	SYEEAFSPSGASD	R.VNTGGSYEEAFSPSGASDK.N	Activating transcription factor 7-interacting protein 2						0.054	0.028	0.074	0.115	0.139	0.147	0.162	0.139	0.13	0.003	0.01	0.065	0.07	0.082	0.074	0.093	0.106	0.08	0.102	0.119	0.104	0.106	0.038	0.021	0.066	0.092	0.14	0.168	0.14	0.153	0.167	0.003	0.012
1772	Form_2185	ATG13	atg13.S	gnl|gene18507|XL-9_2-gene18507|rna54033|	535	5000	FDAFVDSLxxxxx	K.EFDAFVDSL.-	Autophagy-related protein 13						0.107	0.049	0.094	0.102	0.106	0.129	0.132	0.121	0.149	0.002	0.009	0.091	0.103	0.108	0.116	0.103	0.094	0.077	0.094	0.075	0.08	0.059	0.105	0.054	0.109	0.127	0.117	0.13	0.109	0.122	0.12	0.002	0.006
5244	Form_6419	ATG2A	atg2a.L	gnl|gene9947|XL-9_2-gene9947|rna28915|	824;827	5000	EDIDHVSVESPCE;DHVSVESPCELKQ	K.MEDIDHVSVESPCELK.Q	Autophagy-related protein 2 homolog A						0.008	0.005	0.069	0.078	0.139	0.175	0.165	0.173	0.172	0.005	0.01	0.084	0.098	0.084	0.101	0.088	0.089	0.08	0.082	0.09	0.103	0.1	0.008	0.006	0.067	0.09	0.14	0.179	0.152	0.163	0.178	0.006	0.011
5245	Form_6417	ATG2A	atg2a.L	gnl|gene9947|XL-9_2-gene9947|rna28915|	947;949	61.8	SAFKLDSDSEDED;FKLDSDSEDEDSH	K.LDSDSEDEDSHFYSVDEAAR.H	Autophagy-related protein 2 homolog A						0.122	0.07	0.109	0.094	0.121	0.128	0.114	0.125	0.11	0.001	0.005	0.084	0.098	0.084	0.101	0.088	0.089	0.08	0.082	0.09	0.103	0.1	0.117	0.078	0.104	0.108	0.121	0.13	0.104	0.117	0.113	0.001	0.006
5246	Form_6418	ATG2A	atg2a.L	gnl|gene9947|XL-9_2-gene9947|rna28915|	1383;1385	45.7	KKRQITSPSPPPL;RQITSPSPPPLTE	K.RQITSPSPPPLTEGR.V	Autophagy-related protein 2 homolog A						0.02	0.016	0.078	0.075	0.116	0.148	0.15	0.187	0.191	0.011	0.009	0.084	0.098	0.084	0.101	0.088	0.089	0.08	0.082	0.09	0.103	0.1	0.019	0.018	0.075	0.087	0.117	0.151	0.138	0.176	0.197	0.013	0.01
743	Form__925	ATG2B	atg2b.S	gnl|gene13426|XL-9_2-gene13426|rna39067|	1570	72.5	SALPPLSPAKHYM	K.DFGSALPPLSPAK.H	Autophagy-related protein 2 homolog B						0.062	0.055	0.132	0.133	0.109	0.115	0.108	0.114	0.11	0.023	0.039	0.094	0.106	0.091	0.087	0.096	0.099	0.086	0.085	0.081	0.086	0.088	0.064	0.064	0.133	0.128	0.116	0.126	0.103	0.107	0.099	0.022	0.038
1656	Form_2033	ATG2B	atg2b.L	gnl|gene17938|XL-9_2-gene17938|rna52444|	1568	89.4	SALPPPSPAKHYM	K.DFGSALPPPSPAK.H	Autophagy-related protein 2 homolog B						0.071	0.065	0.14	0.136	0.105	0.122	0.085	0.088	0.078	0.035	0.076	0.089	0.098	0.094	0.092	0.094	0.094	0.092	0.09	0.095	0.085	0.077	0.069	0.069	0.144	0.136	0.108	0.125	0.085	0.086	0.081	0.032	0.064
3200	Form_3930	ATP10B	LOC108712644	gnl|gene40960|XL-9_2-gene40960|rna83194|	468	56.2	MYNEEESDDEDMT	K.RLEMYNEEESDDEDMTK.P	Probable phospholipid-transporting ATPase VB						0.093	0.068	0.11	0.123	0.131	0.139	0.11	0.099	0.114	0.003	0.01	0.051	0.062	0.068	0.074	0.089	0.101	0.096	0.099	0.129	0.127	0.104	0.054	0.048	0.085	0.104	0.133	0.16	0.121	0.112	0.168	0.004	0.012
2553	Form_3146	ATP1A3	LOC108697760	gnl|gene34402|XL-9_2-gene34402|rna73961|	219	18.7	CKVDNSSLTGESE	K.VDNSSLTGESEPQTR.S	Sodium/potassium-transporting ATPase subunit alpha	GN:ATP1A3|ATP1A3|human|P13637	0	207	CKVDNSSLTGESE	NaN	0.131	0.069	0.139	0.11	0.113	0.105	0.089	0.099	0.126	0.005	0.013	0.113	0.1	0.107	0.109	0.089	0.099	0.08	0.087	0.071	0.07	0.073	0.156	0.073	0.157	0.126	0.106	0.11	0.075	0.091	0.094	0.004	0.01
2384	Form_2935	ATP2B1	atp2b1.S	gnl|gene2746|XL-9_2-gene2746|rna7995|	1178;1188	183.1	DFRIEDSEPHIPL;IPLIDDTDAEDDA	R.IEDSEPHIPLIDDTDAEDDAPTK.R	Calcium-transporting ATPase	GN:ATP2B1|PMCA1|human|P20020	0	1203	IPLIDDTDAEDDA	NaN	0.117	0.109	0.133	0.11	0.105	0.106	0.101	0.107	0.091	0.008	0.012	0.095	0.089	0.088	0.094	0.092	0.097	0.097	0.101	0.09	0.08	0.076	0.119	0.104	0.126	0.111	0.104	0.11	0.105	0.116	0.088	0.007	0.01
2384	Form_2936	ATP2B1	atp2b1.S	gnl|gene2746|XL-9_2-gene2746|rna7995|	1178	183.1	DFRIEDSEPHIPL	R.IEDSEPHIPLIDDTDAEDDAPTK.R	Calcium-transporting ATPase	GN:ATP2B1|PMCA1|human|P20020	0	1193	EFRIEDSEPHIPL	NaN	0.133	0.122	0.117	0.109	0.116	0.098	0.102	0.087	0.101	0.007	0.007	0.095	0.089	0.088	0.094	0.092	0.097	0.097	0.101	0.09	0.08	0.076	0.136	0.117	0.111	0.11	0.115	0.102	0.106	0.094	0.098	0.006	0.006
2385	Form_2938	ATP2B1	atp2b1.S	gnl|gene2746|XL-9_2-gene2746|rna7995|	1215	5000	NNNALDSGIHLII	K.NNNALDSGIHLIIEPNK.S	Calcium-transporting ATPase	GN:ATP2B1|PMCA1|human|P20020	0	1230	NNNAVDSGIHLTI	NaN	0.017	0.019	0.09	0.139	0.124	0.121	0.135	0.171	0.16	0.008	0.016	0.095	0.089	0.088	0.094	0.092	0.097	0.097	0.101	0.09	0.08	0.076	0.017	0.018	0.084	0.139	0.121	0.125	0.139	0.184	0.153	0.007	0.013
2386	Form_2937	ATP2B1	atp2b1.S	gnl|gene2746|XL-9_2-gene2746|rna7995|	1234;1242	58.5	TSSAPGSPLHSLE;LHSLETSLxxxxx	K.SATSSAPGSPLHSLETSL.-	Calcium-transporting ATPase	GN:ATP2B1|PMCA1|human|P20020	1;1	1249;1257	TSSSPGSPLHSLE;LHSLETSLxxxxx	NaN;NaN	0.045	0.019	0.125	0.147	0.179	0.168	0.098	0.109	0.095	0.004	0.012	0.095	0.089	0.088	0.094	0.092	0.097	0.097	0.101	0.09	0.08	0.076	0.046	0.018	0.117	0.147	0.175	0.174	0.101	0.117	0.091	0.003	0.01
502	Form__636	ATP5F1A	atp5a1.L	gnl|gene1225|XL-9_2-gene1225|rna3565|	46	37.3	GVWLQKSGTAEVS	K.SGTAEVSSILEER.I	ATP synthase subunit alpha, mitochondrial						0.157	0.087	0.105	0.1	0.131	0.126	0.092	0.092	0.102	0.002	0.007	0.075	0.086	0.077	0.082	0.074	0.076	0.099	0.096	0.099	0.117	0.12	0.14	0.089	0.096	0.098	0.116	0.114	0.109	0.105	0.12	0.003	0.01
2	Form____2	ATP5IF1	atpif1.S	gnl|gene10015|XL-9_2-gene10015|rna29109|	24	25.7	MQMRRSSDQLGEL	R.SSDQLGELGK.G	ATPase inhibitor, mitochondrial						0.101	0.077	0.125	0.102	0.104	0.098	0.129	0.123	0.127	0.004	0.008	0.087	0.085	0.08	0.096	0.108	0.115	0.081	0.088	0.101	0.083	0.077	0.095	0.071	0.108	0.106	0.121	0.121	0.113	0.117	0.138	0.004	0.007
3054	Form_3751	ATP5IF1	atpif1.L	gnl|gene39457|XL-9_2-gene39457|rna81050|	24	22.2	MQMRRSSDQLGEF	R.RSSDQLGEFGK.G	ATPase inhibitor, mitochondrial						0.061	0.016	0.099	0.062	0.153	0.139	0.161	0.182	0.113	0.005	0.009	0.076	0.11	0.081	0.143	0.082	0.084	0.073	0.071	0.141	0.073	0.067	0.052	0.02	0.09	0.099	0.141	0.131	0.132	0.145	0.179	0.004	0.007
3054	Form_3752	ATP5IF1	atpif1.L	gnl|gene39457|XL-9_2-gene39457|rna81050|	23	35.3	LMQMRRSSDQLGE	R.SSDQLGEFGK.G	ATPase inhibitor, mitochondrial						0.142	0.051	0.139	0.058	0.14	0.104	0.146	0.119	0.089	0.005	0.008	0.076	0.11	0.081	0.143	0.082	0.084	0.073	0.071	0.141	0.073	0.067	0.122	0.063	0.127	0.093	0.129	0.098	0.12	0.095	0.142	0.004	0.006
3055	Form_3753	ATP5IF1	atpif1.L	gnl|gene39457|XL-9_2-gene39457|rna81050|	43	5000	GGGGGGSIREAGG	K.GGGGGGSIREAGGAFGK.R	ATPase inhibitor, mitochondrial						0.126	0.075	0.089	0.048	0.101	0.097	0.176	0.171	0.098	0.008	0.012	0.076	0.11	0.081	0.143	0.082	0.084	0.073	0.071	0.141	0.073	0.067	0.108	0.093	0.081	0.077	0.094	0.092	0.145	0.137	0.156	0.007	0.009
3690	Form_4535	ATP5PB	atp5f1.S	gnl|gene4531|XL-9_2-gene4531|rna13230|	240	65.5	NVVQSITPQQQKE	K.NVVQSITPQQQK.E	ATP synthase F(0) complex subunit B1, mitochondrial						0.05	0.006	0.154	0.124	0.142	0.144	0.113	0.107	0.122	0.016	0.022	0.088	0.089	0.081	0.091	0.096	0.096	0.09	0.091	0.094	0.091	0.093	0.048	0.006	0.137	0.124	0.15	0.152	0.112	0.107	0.126	0.016	0.022
3550	Form_4362	ATP6V0A2	LOC108716527	gnl|gene43933|XL-9_2-gene43933|rna87595|	690	109.9	TLVRRGSEEELSL	R.RGSEEELSLVR.S	V-type proton ATPase 116 kDa subunit a2	GN:ATP6V0A2|ATP6V0A2|human|Q9Y487	0	695	TLIRKDSEEEVSL	NaN	0.111	0.08	0.094	0.111	0.113	0.117	0.108	0.135	0.117	0.004	0.008	0.087	0.08	0.094	0.093	0.1	0.105	0.091	0.086	0.1	0.083	0.08	0.104	0.069	0.095	0.111	0.121	0.132	0.106	0.125	0.126	0.004	0.007
3323	Form_4101	ATRX	atrx.L	gnl|gene42048|XL-9_2-gene42048|rna84769|	472	15.9	DSDMNASYDTEQA	K.AKPSDSDKPMDSDMNASYDTEQADENGR.N	Transcriptional regulator ATRX						0.109	0.055	0.176	0.161	0.153	0.144	0.064	0.063	0.065	0.003	0.007	0.073	0.076	0.083	0.08	0.086	0.089	0.099	0.107	0.094	0.109	0.104	0.093	0.049	0.17	0.15	0.153	0.149	0.074	0.078	0.071	0.004	0.009
3324	Form_4100	ATRX	atrx.L	gnl|gene42048|XL-9_2-gene42048|rna84769|	704	46.5	PVSLSNSPVKEDN	K.QLVVQLTPVSLSNSPVK.E	Transcriptional regulator ATRX						0.141	0.159	0.094	0.083	0.082	0.076	0.066	0.075	0.1	0.04	0.085	0.073	0.076	0.083	0.08	0.086	0.089	0.099	0.107	0.094	0.109	0.104	0.117	0.138	0.089	0.076	0.08	0.077	0.074	0.091	0.107	0.05	0.101
3325	Form_4099	ATRX	atrx.L	gnl|gene42048|XL-9_2-gene42048|rna84769|	712	17.7	VKEDNCSTGKSPK	K.EDNCSTGK.S	Transcriptional regulator ATRX						0.055	0.1	0.123	0.133	0.128	0.137	0.095	0.106	0.115	0.002	0.005	0.073	0.076	0.083	0.08	0.086	0.089	0.099	0.107	0.094	0.109	0.104	0.046	0.086	0.116	0.121	0.125	0.138	0.107	0.129	0.123	0.003	0.006
3326	Form_4098	ATRX	atrx.L	gnl|gene42048|XL-9_2-gene42048|rna84769|	723	73.5	PKTEICSDAEMEA	K.TEICSDAEMEAQNQNR.A	Transcriptional regulator ATRX						0.108	0.076	0.119	0.118	0.133	0.129	0.09	0.08	0.109	0.013	0.024	0.073	0.076	0.083	0.08	0.086	0.089	0.099	0.107	0.094	0.109	0.104	0.09	0.066	0.113	0.108	0.131	0.131	0.102	0.098	0.117	0.016	0.029
3327	Form_4095	ATRX	atrx.L	gnl|gene42048|XL-9_2-gene42048|rna84769|	835;837	75.1	QKNKSTSDSDEVP;NKSTSDSDEVPEV	K.STSDSDEVPEVLK.K	Transcriptional regulator ATRX						0.14	0.078	0.114	0.116	0.102	0.116	0.084	0.1	0.131	0.01	0.011	0.073	0.076	0.083	0.08	0.086	0.089	0.099	0.107	0.094	0.109	0.104	0.117	0.068	0.108	0.106	0.101	0.118	0.095	0.122	0.141	0.012	0.013
3328	Form_4103	ATRX	atrx.L	gnl|gene42048|XL-9_2-gene42048|rna84769|	1019;1020	64.8	ATGFVQSSGDEAG;TGFVQSSGDEAGT	K.IKPLVENEVVSATGFVQSSGDEAGTK.C	Transcriptional regulator ATRX	GN:ATRX|ATRX|human|P46100	0	1245	TGFCQSSGDEALS	NaN	0.099	0.052	0.065	0.06	0.095	0.082	0.163	0.169	0.194	0.006	0.016	0.073	0.076	0.083	0.08	0.086	0.089	0.099	0.107	0.094	0.109	0.104	0.079	0.043	0.059	0.052	0.089	0.08	0.176	0.197	0.199	0.007	0.018
3329	Form_4093	ATRX	atrx.L	gnl|gene42048|XL-9_2-gene42048|rna84769|	1062;1063	32.3	EIKANLSSDDHED;IKANLSSDDHEDA	K.ANLSSDDHEDAFSDEEPEEGK.K	Transcriptional regulator ATRX						0.084	0.053	0.089	0.087	0.112	0.119	0.123	0.125	0.189	0.007	0.013	0.073	0.076	0.083	0.08	0.086	0.089	0.099	0.107	0.094	0.109	0.104	0.068	0.045	0.082	0.077	0.107	0.118	0.135	0.148	0.197	0.008	0.015
3330	Form_4094	ATRX	atrx.L	gnl|gene42048|XL-9_2-gene42048|rna84769|	1129	70.6	RHKISLSEAESGE	K.ISLSEAESGEEK.G	Transcriptional regulator ATRX						0.081	0.039	0.084	0.114	0.141	0.129	0.116	0.137	0.136	0.007	0.015	0.073	0.076	0.083	0.08	0.086	0.089	0.099	0.107	0.094	0.109	0.104	0.066	0.033	0.078	0.101	0.135	0.128	0.128	0.163	0.142	0.009	0.017
3330	Form_4102	ATRX	atrx.L	gnl|gene42048|XL-9_2-gene42048|rna84769|	1129;1133	130.5	RHKISLSEAESGE;SLSEAESGEEKGD	K.ISLSEAESGEEK.G	Transcriptional regulator ATRX	GN:ATRX|ATRX|human|P46100	0	1348	RHKLTVSDGESGE	NaN	0.158	0.159	0.113	0.173	0.091	0.137	0.053	0.072	0.038	0.003	0.003	0.073	0.076	0.083	0.08	0.086	0.089	0.099	0.107	0.094	0.109	0.104	0.137	0.144	0.112	0.165	0.093	0.145	0.063	0.092	0.042	0.004	0.004
3331	Form_4097	ATRX	atrx.L	gnl|gene42048|XL-9_2-gene42048|rna84769|	1296	141.9	INTEDASPVKCPV	K.VINTEDASPVK.C	Transcriptional regulator ATRX	GN:ATRX|ATRX|human|P46100	0	1527	IEIEDASPTKCPI	NaN	0.061	0.049	0.13	0.156	0.129	0.146	0.104	0.117	0.1	0.002	0.005	0.073	0.076	0.083	0.08	0.086	0.089	0.099	0.107	0.094	0.109	0.104	0.05	0.042	0.122	0.141	0.125	0.147	0.116	0.141	0.106	0.003	0.006
3332	Form_4096	ATRX	atrx.L	gnl|gene42048|XL-9_2-gene42048|rna84769|	1748	77.9	DEEASNSPVAVKA	K.DLNDEEASNSPVAVK.A	Transcriptional regulator ATRX						0.074	0.048	0.138	0.134	0.134	0.112	0.099	0.086	0.114	0.023	0.037	0.073	0.076	0.083	0.08	0.086	0.089	0.099	0.107	0.094	0.109	0.104	0.061	0.041	0.129	0.121	0.13	0.112	0.11	0.104	0.121	0.028	0.043
3829	Form_4706	ATRX	LOC108700535	gnl|gene46622|XL-9_2-gene46622|rna91471|	810	5000	PADSGESPKAKWS	K.HSPADSGESPK.A	Transcriptional regulator ATRX						0.211	0.136	0.15	0.101	0.081	0.087	0.06	0.068	0.063	0.017	0.028	0.092	0.096	0.093	0.088	0.104	0.099	0.1	0.089	0.091	0.078	0.07	0.208	0.14	0.15	0.095	0.09	0.092	0.064	0.065	0.062	0.014	0.021
3829	Form_4707	ATRX	LOC108700535	gnl|gene46622|XL-9_2-gene46622|rna91471|	803;807;810	5000	ISKAKHSPADSGE;KHSPADSGESPKA;PADSGESPKAKWS	K.AKHSPADSGESPK.A	Transcriptional regulator ATRX						0.026	0.013	0.137	0.069	0.124	0.144	0.126	0.153	0.195	0.002	0.012	0.092	0.096	0.093	0.088	0.104	0.099	0.1	0.089	0.091	0.078	0.07	0.025	0.013	0.135	0.064	0.136	0.151	0.133	0.144	0.188	0.002	0.009
3829	Form_4708	ATRX	LOC108700535	gnl|gene46622|XL-9_2-gene46622|rna91471|	807;810	5000	KHSPADSGESPKA;PADSGESPKAKWS	K.HSPADSGESPK.A	Transcriptional regulator ATRX						0.12	0.101	0.229	0.129	0.12	0.101	0.073	0.055	0.057	0.01	0.007	0.092	0.096	0.093	0.088	0.104	0.099	0.1	0.089	0.091	0.078	0.07	0.117	0.103	0.226	0.12	0.132	0.106	0.077	0.052	0.055	0.008	0.005
3362	Form_4145	ATXN2	LOC108707167	gnl|gene42372|XL-9_2-gene42372|rna85248|	260	5000	LENDERSEEEKYT	R.VALENDERSEEEK.Y	Ataxin-2 (Fragment)	GN:ATXN2|ataxin-2|human|Q99700	0	466	LENDDRSEEEKYT	NaN	0.14	0.054	0.168	0.121	0.14	0.11	0.078	0.061	0.117	0.004	0.007	0.068	0.07	0.076	0.076	0.085	0.079	0.109	0.108	0.098	0.119	0.112	0.114	0.045	0.153	0.11	0.142	0.104	0.102	0.079	0.137	0.005	0.01
3363	Form_4139	ATXN2	LOC108707167	gnl|gene42372|XL-9_2-gene42372|rna85248|	332	45.8	SHSSDYSPNAGAD	R.TGSHSSDYSPNAGADQR.V	Ataxin-2 (Fragment)						0.049	0.038	0.142	0.125	0.128	0.148	0.098	0.095	0.115	0.028	0.034	0.068	0.07	0.076	0.076	0.085	0.079	0.109	0.108	0.098	0.119	0.112	0.038	0.03	0.122	0.108	0.123	0.133	0.121	0.116	0.128	0.038	0.043
3364	Form_4138	ATXN2	LOC108707167	gnl|gene42372|XL-9_2-gene42372|rna85248|	480	119.2	SGVQRLSPKTHRP	R.NSSSGGSWSSVVSGVQRLSPK.T	Ataxin-2 (Fragment)	GN:ATXN2|ataxin-2|human|Q99700	0	684	SGVPRLSPKTHRP	NaN	0.065	0.078	0.106	0.103	0.106	0.135	0.102	0.117	0.138	0.021	0.029	0.068	0.07	0.076	0.076	0.085	0.079	0.109	0.108	0.098	0.119	0.112	0.05	0.062	0.091	0.088	0.102	0.12	0.125	0.143	0.153	0.028	0.037
3365	Form_4142	ATXN2	LOC108707167	gnl|gene42372|XL-9_2-gene42372|rna85248|	534	35.9	ASNRAVTPSCEAK	R.AVTPSCEAK.D	Ataxin-2 (Fragment)	GN:ATXN2|ataxin-2|human|Q99700	0	741	ASNRAVTPSSEAK	NaN	0.009	0.011	0.199	0.161	0.128	0.151	0.088	0.089	0.09	0.021	0.053	0.068	0.07	0.076	0.076	0.085	0.079	0.109	0.108	0.098	0.119	0.112	0.007	0.009	0.172	0.139	0.124	0.135	0.109	0.109	0.1	0.028	0.067
3366	Form_4144	ATXN2	LOC108707167	gnl|gene42372|XL-9_2-gene42372|rna85248|	551	5000	QDQRQNSPAGCRE	R.QNSPAGCR.E	Ataxin-2 (Fragment)	GN:ATXN2|ataxin-2|human|Q99700	0	758	QDQRQNSPAGNKE	NaN	0.008	0.016	0.171	0.151	0.136	0.166	0.093	0.092	0.109	0.027	0.03	0.068	0.07	0.076	0.076	0.085	0.079	0.109	0.108	0.098	0.119	0.112	0.006	0.013	0.147	0.13	0.131	0.149	0.115	0.113	0.121	0.037	0.038
3367	Form_4140	ATXN2	LOC108707167	gnl|gene42372|XL-9_2-gene42372|rna85248|	575	54.4	TENKVVSPMASEQ	K.VVSPMASEQR.K	Ataxin-2 (Fragment)						0.063	0.049	0.166	0.149	0.141	0.156	0.075	0.068	0.079	0.023	0.031	0.068	0.07	0.076	0.076	0.085	0.079	0.109	0.108	0.098	0.119	0.112	0.05	0.04	0.148	0.133	0.14	0.144	0.096	0.086	0.091	0.032	0.041
3368	Form_4143	ATXN2	LOC108707167	gnl|gene42372|XL-9_2-gene42372|rna85248|	602	22.2	RLQPSSSPDTLDP	R.LQPSSSPDTLDPLPIK.S	Ataxin-2 (Fragment)						0.051	0.022	0.09	0.127	0.136	0.175	0.111	0.139	0.128	0.008	0.013	0.068	0.07	0.076	0.076	0.085	0.079	0.109	0.108	0.098	0.119	0.112	0.039	0.017	0.077	0.109	0.13	0.156	0.136	0.169	0.141	0.011	0.017
3369	Form_4141	ATXN2	LOC108707167	gnl|gene42372|XL-9_2-gene42372|rna85248|	682	20.9	SQGVQTSGPSKQN	K.RGPEVTSQGVQTSGPSK.Q	Ataxin-2 (Fragment)						0.02	0.015	0.1	0.127	0.112	0.153	0.088	0.15	0.217	0.006	0.011	0.068	0.07	0.076	0.076	0.085	0.079	0.109	0.108	0.098	0.119	0.112	0.015	0.012	0.084	0.107	0.105	0.134	0.106	0.18	0.236	0.008	0.014
3442	Form_4238	ATXN2	atxn2.L	gnl|gene42906|XL-9_2-gene42906|rna86041|	481	124.2	SGVQRLSPKTHRP	R.NSSSGGTWSSVVSGVQRLSPK.T	Ataxin-2 (Fragment)	GN:ATXN2|ataxin-2|human|Q99700	0	684	SGVPRLSPKTHRP	NaN	0.047	0.075	0.075	0.099	0.091	0.1	0.127	0.161	0.154	0.03	0.043	0.08	0.08	0.098	0.09	0.101	0.103	0.091	0.085	0.095	0.094	0.084	0.041	0.065	0.08	0.097	0.1	0.112	0.126	0.149	0.159	0.031	0.039
3443	Form_4240	ATXN2	atxn2.L	gnl|gene42906|XL-9_2-gene42906|rna86041|	574	80.2	TENKAVSPMASEQ	K.AVSPMASEQR.K	Ataxin-2 (Fragment)						0.055	0.053	0.14	0.122	0.125	0.117	0.098	0.093	0.099	0.038	0.061	0.08	0.08	0.098	0.09	0.101	0.103	0.091	0.085	0.095	0.094	0.084	0.047	0.046	0.148	0.118	0.136	0.13	0.096	0.085	0.101	0.038	0.055
3444	Form_4239	ATXN2	atxn2.L	gnl|gene42906|XL-9_2-gene42906|rna86041|	600	17.2	FRLQPSSSPDALD	R.LQPSSSPDALDQLPVK.S	Ataxin-2 (Fragment)						0.002	0.005	0.072	0.117	0.116	0.136	0.13	0.184	0.184	0.023	0.031	0.08	0.08	0.098	0.09	0.101	0.103	0.091	0.085	0.095	0.094	0.084	0.002	0.004	0.075	0.112	0.125	0.15	0.126	0.167	0.187	0.023	0.028
1852	Form_2282	ATXN2L	atxn2l.S	gnl|gene18842|XL-9_2-gene18842|rna54996|	23;26	147.7	PAQQQGSPGSPNG;QQGSPGSPNGNLP	K.PAMAPAQQQGSPGSPNGNLPPGGSR.S	Ataxin-2-like protein						0.082	0.019	0.13	0.11	0.134	0.122	0.127	0.095	0.119	0.024	0.036	0.08	0.08	0.089	0.094	0.096	0.097	0.096	0.099	0.094	0.092	0.083	0.071	0.016	0.125	0.112	0.139	0.128	0.132	0.102	0.121	0.024	0.032
1853	Form_2283	ATXN2L	atxn2l.S	gnl|gene18842|XL-9_2-gene18842|rna54996|	321	14	YPESSCSPEQRGM	R.GAPQHYPESSCSPEQR.G	Ataxin-2-like protein						0.033	0.043	0.124	0.117	0.117	0.147	0.115	0.139	0.129	0.01	0.026	0.08	0.08	0.089	0.094	0.096	0.097	0.096	0.099	0.094	0.092	0.083	0.028	0.037	0.118	0.118	0.12	0.152	0.118	0.147	0.13	0.01	0.023
1854	Form_2281	ATXN2L	atxn2l.S	gnl|gene18842|XL-9_2-gene18842|rna54996|	403	27.6	VAPKPSSPNSSTP	K.PSSPNSSTPIMPGEGK.D	Ataxin-2-like protein						0.017	0.015	0.07	0.146	0.112	0.166	0.077	0.169	0.113	0.073	0.042	0.08	0.08	0.089	0.094	0.096	0.097	0.096	0.099	0.094	0.092	0.083	0.014	0.013	0.066	0.146	0.114	0.171	0.078	0.177	0.113	0.071	0.037
1854	Form_2284	ATXN2L	atxn2l.S	gnl|gene18842|XL-9_2-gene18842|rna54996|	408	24.2	SSPNSSTPIMPGE	K.PSSPNSSTPIMPGEGK.D	Ataxin-2-like protein						0.005	0.005	0.094	0.107	0.14	0.13	0.116	0.124	0.158	0.054	0.067	0.08	0.08	0.089	0.094	0.096	0.097	0.096	0.099	0.094	0.092	0.083	0.004	0.004	0.089	0.107	0.143	0.134	0.118	0.131	0.158	0.053	0.059
1855	Form_2280	ATXN2L	atxn2l.S	gnl|gene18842|XL-9_2-gene18842|rna54996|	430;435	80.8	VKEQSRTPEQLTP;RTPEQLTPCQVPK	K.EQSRTPEQLTPCQVPK.Q	Ataxin-2-like protein						0.003	0.008	0.119	0.128	0.091	0.113	0.117	0.128	0.106	0.066	0.119	0.08	0.08	0.089	0.094	0.096	0.097	0.096	0.099	0.094	0.092	0.083	0.003	0.007	0.114	0.129	0.094	0.118	0.121	0.136	0.107	0.065	0.106
2677	Form_3290	ATXN2L	LOC108704751	gnl|gene35359|XL-9_2-gene35359|rna75315|	23;26	5000	PAQQQGSPGSPNG;QQGSPGSPNGNLP	K.PAMAPAQQQGSPGSPNGNLPPGGGR.S	Ataxin-2-like protein						0.044	0.039	0.096	0.107	0.144	0.136	0.114	0.123	0.147	0.016	0.034	0.087	0.08	0.1	0.095	0.103	0.102	0.1	0.09	0.093	0.079	0.073	0.04	0.033	0.101	0.107	0.155	0.145	0.12	0.116	0.143	0.013	0.026
2677	Form_3291	ATXN2L	LOC108704751	gnl|gene35359|XL-9_2-gene35359|rna75315|	26	5000	QQGSPGSPNGNLP	R.KPAMAPAQQQGSPGSPNGNLPPGGGR.S	Ataxin-2-like protein						0.165	0.16	0.066	0.046	0.026	0.042	0.035	0.043	0.037	0.173	0.207	0.087	0.08	0.1	0.095	0.103	0.102	0.1	0.09	0.093	0.079	0.073	0.169	0.151	0.078	0.051	0.032	0.051	0.041	0.046	0.041	0.161	0.178
3749	Form_4608	AVEN	aven.L	gnl|gene45791|XL-9_2-gene45791|rna90329|	265	38.2	SDLHEKSEEPLPV	K.SEEPLPVTDVATSSDEK.E	Cell death regulator Aven						0.017	0.011	0.071	0.098	0.129	0.169	0.132	0.157	0.202	0.004	0.009	0.083	0.082	0.069	0.07	0.086	0.084	0.096	0.101	0.102	0.109	0.118	0.016	0.01	0.054	0.076	0.123	0.158	0.141	0.176	0.229	0.005	0.012
1121	Form_1392	BAG3	bag3.L	gnl|gene1519|XL-9_2-gene1519|rna4416|	148	60.6	NFNRPQSPAWSST	R.NFNRPQSPAWSSTEAQADR.Q	BAG family molecular chaperone regulator 3						0.047	0.039	0.144	0.164	0.11	0.127	0.093	0.083	0.07	0.04	0.084	0.08	0.08	0.102	0.091	0.101	0.105	0.09	0.093	0.092	0.084	0.084	0.04	0.033	0.157	0.159	0.118	0.142	0.089	0.082	0.069	0.036	0.075
1122	Form_1391	BAG3	bag3.L	gnl|gene1519|XL-9_2-gene1519|rna4416|	273;281	72.7	ISSREGSPIPNLS;IPNLSQSPATIKV	R.EGSPIPNLSQSPATIK.V	BAG family molecular chaperone regulator 3						0.019	0.015	0.137	0.166	0.14	0.14	0.121	0.118	0.091	0.018	0.035	0.08	0.08	0.102	0.091	0.101	0.105	0.09	0.093	0.092	0.084	0.084	0.016	0.013	0.147	0.159	0.148	0.154	0.114	0.115	0.088	0.016	0.031
1122	Form_1393	BAG3	bag3.L	gnl|gene1519|XL-9_2-gene1519|rna4416|	281	47.7	IPNLSQSPATIKV	R.EGSPIPNLSQSPATIK.V	BAG family molecular chaperone regulator 3						0.049	0.059	0.171	0.126	0.093	0.083	0.107	0.087	0.075	0.045	0.105	0.08	0.08	0.102	0.091	0.101	0.105	0.09	0.093	0.092	0.084	0.084	0.042	0.051	0.188	0.124	0.101	0.094	0.104	0.087	0.074	0.041	0.095
2511	Form_3099	BAG6	bag6.S	gnl|gene3297|XL-9_2-gene3297|rna9558|	211	17.7	ESEGEASSRETLP	R.LEGQPGNEQAAEPMDTAESEGEASSR.E	BCL2-associated athanogene 6						0.113	0.052	0.095	0.109	0.123	0.12	0.106	0.122	0.106	0.036	0.019	0.095	0.09	0.102	0.097	0.093	0.096	0.089	0.094	0.089	0.077	0.077	0.115	0.05	0.104	0.114	0.123	0.124	0.101	0.123	0.101	0.03	0.016
3197	Form_3926	BAG6	bag6.L	gnl|gene4093|XL-9_2-gene4093|rna11918|	206	59.2	PMDTAESEGEASS	R.ILDRLEGQAVNEQAAEPMDTAESEGEASSR.E	BCL2-associated athanogene 6						0.085	0.074	0.113	0.107	0.117	0.097	0.079	0.084	0.149	0.022	0.073	0.107	0.098	0.103	0.087	0.094	0.092	0.089	0.084	0.082	0.084	0.081	0.1	0.079	0.127	0.102	0.12	0.098	0.077	0.077	0.134	0.02	0.065
4476	Form_5492	BAP1	bap1.L	gnl|gene6209|XL-9_2-gene6209|rna18135|	381	5000	NHNYAKSPMQEEE	K.SPMQEEEDLAAGVGR.S	Ubiquitin carboxyl-terminal hydrolase BAP1	GN:BAP1|BAP1|human|Q92560	0	369	NHNYAKSPMQEEE	1	0.024	0.029	0.101	0.126	0.123	0.128	0.13	0.123	0.168	0.02	0.027	0.099	0.098	0.096	0.1	0.102	0.101	0.094	0.099	0.091	0.047	0.072	0.025	0.03	0.101	0.132	0.131	0.135	0.128	0.127	0.16	0.01	0.02
124	Form__161	BARD1	bard1.L	gnl|gene10521|XL-9_2-gene10521|rna30567|	335	5000	DTPEEISPNWNKC	K.NDTPEEISPNWNK.C	BRCA1-associated RING domain protein 1						0.014	0.006	0.098	0.086	0.153	0.099	0.129	0.085	0.174	0.063	0.093	0.105	0.11	0.133	0.118	0.093	0.082	0.083	0.068	0.068	0.066	0.074	0.017	0.008	0.15	0.116	0.163	0.093	0.123	0.066	0.136	0.048	0.079
124	Form__163	BARD1	bard1.L	gnl|gene10521|XL-9_2-gene10521|rna30567|	330;335	5000	SSLKNDTPEEISP;DTPEEISPNWNKC	K.NDTPEEISPNWNK.C	BRCA1-associated RING domain protein 1						0.019	0.012	0.044	0.074	0.087	0.153	0.122	0.164	0.225	0.058	0.042	0.105	0.11	0.133	0.118	0.093	0.082	0.083	0.068	0.068	0.066	0.074	0.024	0.016	0.072	0.106	0.098	0.153	0.123	0.136	0.186	0.047	0.038
125	Form__162	BARD1	bard1.L	gnl|gene10521|XL-9_2-gene10521|rna30567|	477	88.5	STAMPISPNNLTN	K.STAMPISPNNLTNVK.R	BRCA1-associated RING domain protein 1						0.062	0.059	0.139	0.128	0.122	0.119	0.088	0.089	0.09	0.033	0.072	0.105	0.11	0.133	0.118	0.093	0.082	0.083	0.068	0.068	0.066	0.074	0.069	0.069	0.195	0.16	0.12	0.103	0.077	0.064	0.065	0.023	0.056
496	Form__628	BAZ1A	baz1a.S	gnl|gene12251|XL-9_2-gene12251|rna35610|	705	26.6	QDELDTSSENKDA	K.DIGNEEQDELDTSSENK.D	Bromodomain adjacent to zinc finger domain protein 1A						0.023	0.024	0.109	0.136	0.133	0.157	0.114	0.125	0.145	0.021	0.013	0.111	0.076	0.093	0.089	0.099	0.095	0.093	0.094	0.091	0.07	0.088	0.027	0.02	0.109	0.13	0.142	0.161	0.114	0.127	0.142	0.016	0.012
497	Form__634	BAZ1A	baz1a.S	gnl|gene12251|XL-9_2-gene12251|rna35610|	718;720	137.9	EQRGQDSASEDEE;RGQDSASEDEEDA	R.GQDSASEDEEDAKPTGK.K	Bromodomain adjacent to zinc finger domain protein 1A						0.063	0.055	0.15	0.105	0.14	0.111	0.125	0.096	0.145	0.003	0.007	0.111	0.076	0.093	0.089	0.099	0.095	0.093	0.094	0.091	0.07	0.088	0.075	0.045	0.149	0.1	0.148	0.113	0.124	0.096	0.141	0.002	0.007
498	Form__630	BAZ1A	baz1a.S	gnl|gene12251|XL-9_2-gene12251|rna35610|	850;852	37.3	GVNGHDSTSPLQE;NGHDSTSPLQENK	K.DITGVNGHDSTSPLQENK.K	Bromodomain adjacent to zinc finger domain protein 1A						0.065	0.059	0.094	0.122	0.123	0.137	0.108	0.104	0.161	0.013	0.014	0.111	0.076	0.093	0.089	0.099	0.095	0.093	0.094	0.091	0.07	0.088	0.077	0.048	0.094	0.117	0.131	0.14	0.108	0.105	0.157	0.01	0.013
498	Form__631	BAZ1A	baz1a.S	gnl|gene12251|XL-9_2-gene12251|rna35610|	852	37.3	NGHDSTSPLQENK	K.DITGVNGHDSTSPLQENK.K	Bromodomain adjacent to zinc finger domain protein 1A						0.018	0.019	0.056	0.109	0.106	0.136	0.106	0.152	0.13	0.12	0.048	0.111	0.076	0.093	0.089	0.099	0.095	0.093	0.094	0.091	0.07	0.088	0.022	0.016	0.058	0.107	0.116	0.143	0.109	0.158	0.131	0.093	0.047
499	Form__632	BAZ1A	baz1a.S	gnl|gene12251|XL-9_2-gene12251|rna35610|	928	55.2	FNIADNTPPTLDF	R.FNIADNTPPTLDFK.P	Bromodomain adjacent to zinc finger domain protein 1A						0.02	0.019	0.069	0.092	0.088	0.128	0.108	0.121	0.153	0.114	0.087	0.111	0.076	0.093	0.089	0.099	0.095	0.093	0.094	0.091	0.07	0.088	0.025	0.016	0.071	0.091	0.097	0.135	0.111	0.126	0.154	0.088	0.085
500	Form__629	BAZ1A	baz1a.S	gnl|gene12251|XL-9_2-gene12251|rna35610|	1318	57.2	QGRKTRSAPSLEP	R.SAPSLEPTSR.L	Bromodomain adjacent to zinc finger domain protein 1A						0.047	0.032	0.101	0.149	0.104	0.136	0.115	0.127	0.15	0.016	0.023	0.111	0.076	0.093	0.089	0.099	0.095	0.093	0.094	0.091	0.07	0.088	0.056	0.026	0.101	0.143	0.111	0.139	0.115	0.128	0.147	0.012	0.022
500	Form__633	BAZ1A	baz1a.S	gnl|gene12251|XL-9_2-gene12251|rna35610|	1316;1318	57.2	RGQGRKTRSAPSL;QGRKTRSAPSLEP	K.TRSAPSLEPTSR.L	Bromodomain adjacent to zinc finger domain protein 1A						0.01	0.013	0.092	0.096	0.104	0.128	0.136	0.166	0.222	0.02	0.014	0.111	0.076	0.093	0.089	0.099	0.095	0.093	0.094	0.091	0.07	0.088	0.012	0.011	0.092	0.092	0.111	0.131	0.137	0.168	0.218	0.015	0.013
5256	Form_6430	BAZ1A	baz1a.L	gnl|gene9976|XL-9_2-gene9976|rna29004|	162;164	147.1	DDTIVISDSDEEQ;TIVISDSDEEQPK	R.NDDTIVISDSDEEQPK.E	Bromodomain adjacent to zinc finger domain protein 1A						0.11	0.063	0.096	0.112	0.125	0.118	0.112	0.115	0.12	0.01	0.019	0.109	0.108	0.095	0.09	0.092	0.091	0.088	0.087	0.087	0.071	0.08	0.129	0.073	0.098	0.109	0.124	0.116	0.106	0.108	0.112	0.008	0.016
5256	Form_6432	BAZ1A	baz1a.L	gnl|gene9976|XL-9_2-gene9976|rna29004|	158	60.5	HIRNDDTIVISDS	R.NDDTIVISDSDEEQPK.E	Bromodomain adjacent to zinc finger domain protein 1A						0.043	0.011	0.025	0.035	0.033	0.02	0.026	0.025	0.013	0.476	0.294	0.109	0.108	0.095	0.09	0.092	0.091	0.088	0.087	0.087	0.071	0.08	0.059	0.015	0.03	0.04	0.038	0.023	0.029	0.028	0.014	0.427	0.297
5256	Form_6433	BAZ1A	baz1a.L	gnl|gene9976|XL-9_2-gene9976|rna29004|	164	144.4	TIVISDSDEEQPK	R.NDDTIVISDSDEEQPK.E	Bromodomain adjacent to zinc finger domain protein 1A						0.083	0.074	0.094	0.114	0.112	0.134	0.108	0.13	0.117	0.019	0.015	0.109	0.108	0.095	0.09	0.092	0.091	0.088	0.087	0.087	0.071	0.08	0.098	0.087	0.097	0.111	0.112	0.132	0.103	0.123	0.11	0.015	0.013
5256	Form_6438	BAZ1A	baz1a.L	gnl|gene9976|XL-9_2-gene9976|rna29004|	162	147.1	DDTIVISDSDEEQ	R.NDDTIVISDSDEEQPK.E	Bromodomain adjacent to zinc finger domain protein 1A						0.065	0.041	0.085	0.102	0.115	0.105	0.127	0.121	0.135	0.041	0.063	0.109	0.108	0.095	0.09	0.092	0.091	0.088	0.087	0.087	0.071	0.08	0.078	0.049	0.09	0.102	0.117	0.106	0.124	0.117	0.13	0.032	0.056
5257	Form_6429	BAZ1A	baz1a.L	gnl|gene9976|XL-9_2-gene9976|rna29004|	853	55	NGHESTSPLQENK	K.DITGVNGHESTSPLQENK.K	Bromodomain adjacent to zinc finger domain protein 1A						0.033	0.015	0.09	0.105	0.127	0.117	0.108	0.114	0.144	0.077	0.07	0.109	0.108	0.095	0.09	0.092	0.091	0.088	0.087	0.087	0.071	0.08	0.041	0.018	0.096	0.107	0.132	0.12	0.107	0.112	0.141	0.062	0.063
5258	Form_6437	BAZ1A	baz1a.L	gnl|gene9976|XL-9_2-gene9976|rna29004|	929	48.7	FNIADNTPPTLEF	R.FNIADNTPPTLEFK.P	Bromodomain adjacent to zinc finger domain protein 1A						0.024	0.02	0.068	0.071	0.098	0.115	0.105	0.134	0.155	0.119	0.09	0.109	0.108	0.095	0.09	0.092	0.091	0.088	0.087	0.087	0.071	0.08	0.03	0.025	0.074	0.073	0.103	0.12	0.106	0.134	0.155	0.097	0.083
5259	Form_6431	BAZ1A	baz1a.L	gnl|gene9976|XL-9_2-gene9976|rna29004|	942	28.8	KPGRGRSLNTSES	R.SLNTSESLPVSGEK.Q	Bromodomain adjacent to zinc finger domain protein 1A						0.008	0.008	0.079	0.105	0.174	0.129	0.139	0.13	0.168	0.018	0.041	0.109	0.108	0.095	0.09	0.092	0.091	0.088	0.087	0.087	0.071	0.08	0.01	0.01	0.084	0.106	0.18	0.132	0.137	0.127	0.164	0.014	0.037
5260	Form_6435	BAZ1A	baz1a.L	gnl|gene9976|XL-9_2-gene9976|rna29004|	1322	67.1	RGRKARSAPSLEP	R.SAPSLEPTSR.L	Bromodomain adjacent to zinc finger domain protein 1A						0.046	0.022	0.096	0.144	0.109	0.138	0.118	0.133	0.153	0.015	0.025	0.109	0.108	0.095	0.09	0.092	0.091	0.088	0.087	0.087	0.071	0.08	0.056	0.026	0.101	0.143	0.111	0.139	0.115	0.128	0.147	0.012	0.022
5261	Form_6440	BAZ1A	baz1a.L	gnl|gene9976|XL-9_2-gene9976|rna29004|	1383	21.9	DNTPASSPFAFRP	K.SADNTPASSPFAFRPFSLDSNEPTPPGR.R	Bromodomain adjacent to zinc finger domain protein 1A						0.066	0.094	0.125	0.146	0.128	0.121	0.132	0.099	0.065	0.018	0.006	0.109	0.108	0.095	0.09	0.092	0.091	0.088	0.087	0.087	0.071	0.08	0.077	0.109	0.128	0.142	0.127	0.119	0.125	0.093	0.061	0.014	0.005
5262	Form_6436	BAZ1A	baz1a.L	gnl|gene9976|XL-9_2-gene9976|rna29004|	1408	36.2	RRPRSQSLLPSQN	R.SQSLLPSQNEPK.G	Bromodomain adjacent to zinc finger domain protein 1A						0.038	0.038	0.096	0.117	0.129	0.137	0.144	0.161	0.128	0.004	0.008	0.109	0.108	0.095	0.09	0.092	0.091	0.088	0.087	0.087	0.071	0.08	0.046	0.045	0.1	0.116	0.131	0.137	0.14	0.154	0.123	0.003	0.007
5262	Form_6439	BAZ1A	baz1a.L	gnl|gene9976|XL-9_2-gene9976|rna29004|	1406	29.8	PGRRPRSQSLLPS	R.SQSLLPSQNEPK.G	Bromodomain adjacent to zinc finger domain protein 1A						0.007	0.003	0.158	0.186	0.146	0.145	0.111	0.117	0.113	0.005	0.01	0.109	0.108	0.095	0.09	0.092	0.091	0.088	0.087	0.087	0.071	0.08	0.008	0.003	0.166	0.185	0.149	0.146	0.108	0.113	0.109	0.004	0.009
5263	Form_6434	BAZ1A	baz1a.L	gnl|gene9976|XL-9_2-gene9976|rna29004|	1425	37.8	RGKKRLSGDTSSL	K.RLSGDTSSLAQGNRR.S	Bromodomain adjacent to zinc finger domain protein 1A						0.025	0.011	0.079	0.123	0.141	0.169	0.126	0.156	0.154	0.008	0.008	0.109	0.108	0.095	0.09	0.092	0.091	0.088	0.087	0.087	0.071	0.08	0.03	0.013	0.083	0.123	0.144	0.171	0.123	0.151	0.149	0.006	0.007
3130	Form_3848	BAZ1B	LOC398269	gnl|gene40207|XL-9_2-gene40207|rna82105|	309	47.1	YMTLNPSPATKRK	K.YMTLNPSPATK.R	Tyrosine-protein kinase BAZ1B						0.051	0.053	0.204	0.177	0.102	0.129	0.086	0.083	0.06	0.017	0.038	0.093	0.102	0.101	0.098	0.103	0.103	0.086	0.079	0.076	0.078	0.082	0.05	0.057	0.217	0.183	0.111	0.14	0.078	0.069	0.048	0.014	0.033
3131	Form_3846	BAZ1B	LOC398269	gnl|gene40207|XL-9_2-gene40207|rna82105|	337	16.9	SPLSPSSWSQVNL	K.SPLSPSSWSQVNLK.K	Tyrosine-protein kinase BAZ1B						0.052	0.034	0.095	0.112	0.095	0.102	0.113	0.122	0.123	0.064	0.088	0.093	0.102	0.101	0.098	0.103	0.103	0.086	0.079	0.076	0.078	0.082	0.054	0.038	0.106	0.122	0.108	0.117	0.108	0.107	0.104	0.055	0.08
3131	Form_3847	BAZ1B	LOC398269	gnl|gene40207|XL-9_2-gene40207|rna82105|	334	36.1	SKKSPLSPSSWSQ	K.SPLSPSSWSQVNLK.K	Tyrosine-protein kinase BAZ1B						0.053	0.036	0.096	0.108	0.096	0.095	0.111	0.122	0.125	0.066	0.091	0.093	0.102	0.101	0.098	0.103	0.103	0.086	0.079	0.076	0.078	0.082	0.055	0.041	0.108	0.118	0.11	0.109	0.106	0.107	0.106	0.057	0.083
5085	Form_6224	BAZ1B	baz1b.L	gnl|gene8976|XL-9_2-gene8976|rna26139|	163;166	44	SEGSCDSPSSDKE;SCDSPSSDKENSN	K.SEGSCDSPSSDK.E	Tyrosine-protein kinase BAZ1B	GN:BAZ1B|WSTF|human|Q9UIG0	0;0	158;161	SDGACDSPSSDKE;ACDSPSSDKENSS	2;NaN	0.041	0.04	0.104	0.107	0.134	0.121	0.139	0.127	0.168	0.008	0.01	0.096	0.099	0.097	0.095	0.098	0.098	0.088	0.084	0.086	0.081	0.079	0.043	0.043	0.11	0.111	0.143	0.129	0.133	0.116	0.157	0.007	0.009
5086	Form_6222	BAZ1B	baz1b.L	gnl|gene8976|XL-9_2-gene8976|rna26139|	316;319	5000	SATKRKSLGSPDQ;KRKSLGSPDQKPA	K.SLGSPDQK.P	Tyrosine-protein kinase BAZ1B						0.013	0.016	0.073	0.071	0.103	0.165	0.125	0.246	0.174	0.006	0.009	0.096	0.099	0.097	0.095	0.098	0.098	0.088	0.084	0.086	0.081	0.079	0.014	0.017	0.078	0.074	0.111	0.178	0.121	0.228	0.165	0.005	0.008
5087	Form_6223	BAZ1B	baz1b.L	gnl|gene8976|XL-9_2-gene8976|rna26139|	682	178.1	PAGENESIEKGDE	K.SDSPAGENESIEK.G	Tyrosine-protein kinase BAZ1B						0.12	0.075	0.136	0.113	0.116	0.106	0.104	0.112	0.111	0.003	0.005	0.096	0.099	0.097	0.095	0.098	0.098	0.088	0.084	0.086	0.081	0.079	0.123	0.08	0.141	0.115	0.122	0.111	0.098	0.101	0.102	0.003	0.004
269	Form__354	BAZ2A	baz2a.L	gnl|gene11235|XL-9_2-gene11235|rna32672|	911	48.7	LDSIDESAIQKDY	R.NAEENDELDSIDESAIQK.D	Bromodomain adjacent to zinc finger domain protein 2A						0.029	0.045	0.154	0.168	0.108	0.129	0.106	0.13	0.102	0.007	0.02	0.095	0.097	0.09	0.084	0.089	0.09	0.094	0.09	0.095	0.09	0.087	0.031	0.048	0.154	0.157	0.107	0.129	0.111	0.13	0.108	0.007	0.019
2924	Form_3597	BCAP31	MGC84076	gnl|gene38057|XL-9_2-gene38057|rna79059|	205	46.7	TLHKSESEVVAIK	K.SESEVVAIK.K	B-cell receptor-associated protein 31						0.146	0.082	0.09	0.098	0.103	0.104	0.126	0.1	0.142	0.001	0.009	0.098	0.098	0.097	0.094	0.101	0.097	0.086	0.082	0.088	0.073	0.084	0.154	0.086	0.094	0.099	0.112	0.108	0.116	0.088	0.134	0.001	0.008
4374	Form_5371	BCAP31	bcap31.L	gnl|gene5630|XL-9_2-gene5630|rna16483|	168	49.6	SLGVEVSDLPDTN	K.SLGVEVSDLPDTNVEEDNK.K	B-cell receptor-associated protein 31						0.018	0.008	0.071	0.059	0.152	0.128	0.152	0.137	0.242	0.012	0.021	0.087	0.111	0.097	0.126	0.083	0.092	0.085	0.09	0.099	0.072	0.058	0.017	0.01	0.075	0.08	0.137	0.128	0.14	0.134	0.26	0.009	0.013
1859	Form_2288	BCAS2	bcas2.L	gnl|gene18896|XL-9_2-gene18896|rna55153|	170	52.4	NWQRKNSQLTAGG	K.NSQLTAGGR.L	Pre-mRNA-splicing factor SPF27						0.042	0.018	0.091	0.076	0.134	0.133	0.167	0.136	0.173	0.01	0.02	0.094	0.09	0.086	0.077	0.096	0.091	0.089	0.097	0.1	0.087	0.093	0.043	0.018	0.085	0.063	0.139	0.131	0.161	0.143	0.187	0.009	0.02
3202	Form_3932	BCAS3	LOC108708289	gnl|gene41034|XL-9_2-gene41034|rna83303|	551	34.6	KAAPQISPSKSAG	K.AAPQISPSK.S	Breast carcinoma-amplified sequence 3	GN:BCAS3|BCAS3|human|Q9H6U6	0	570	KPPPQISPSKSMG	NaN	0.063	0.054	0.154	0.101	0.105	0.117	0.133	0.116	0.119	0.014	0.023	0.088	0.081	0.084	0.112	0.105	0.1	0.081	0.093	0.084	0.092	0.079	0.061	0.048	0.141	0.124	0.12	0.128	0.118	0.118	0.109	0.014	0.02
3203	Form_3933	BCAS3	LOC108708289	gnl|gene41034|XL-9_2-gene41034|rna83303|	867	49	ELRRDGSIETLSN	R.DGSIETLSNSSGSTSGSIPR.N	Breast carcinoma-amplified sequence 3	GN:BCAS3|BCAS3|human|Q9H6U6	0	886	ELQREGSIETLSN	NaN	0.107	0.067	0.113	0.102	0.121	0.125	0.099	0.112	0.125	0.007	0.02	0.088	0.081	0.084	0.112	0.105	0.1	0.081	0.093	0.084	0.092	0.079	0.102	0.059	0.103	0.124	0.138	0.135	0.087	0.113	0.114	0.007	0.017
4433	Form_5439	BCCIP	bccip.L	gnl|gene5964|XL-9_2-gene5964|rna17444|	110	114.4	AEGQDDSDDDEDD	K.QAEGQDDSDDDEDDDHVFGVISLVNLTER.K	BRCA2 and CDKN1A-interacting protein						0.037	0.012	0.011	0.013	0.016	0.026	0.234	0.316	0.308	0.007	0.02	0.096	0.096	0.101	0.095	0.097	0.093	0.092	0.086	0.089	0.075	0.081	0.04	0.013	0.013	0.014	0.017	0.027	0.241	0.304	0.307	0.006	0.018
4887	Form_5989	BCL2L13	bcl2l13.L	gnl|gene8176|XL-9_2-gene8176|rna23810|	283	28.6	ERSENNSSNSDIV	R.SENNSSNSDIVHVEK.E	Bcl-2-like protein 13	GN:BCL2L13|Bcl-2L13|human|Q9BXK5	0	302	EKSENNSSNSDIV	NaN	0.144	0.11	0.175	0.121	0.115	0.111	0.073	0.074	0.066	0.006	0.004	0.074	0.055	0.064	0.066	0.087	0.078	0.106	0.101	0.115	0.121	0.132	0.136	0.077	0.143	0.102	0.127	0.11	0.099	0.095	0.097	0.009	0.007
4888	Form_5990	BCL2L13	bcl2l13.L	gnl|gene8176|XL-9_2-gene8176|rna23810|	373	5000	KEPAPPSEEAKEE	K.EPAPPSEEAK.E	Bcl-2-like protein 13						0.091	0.088	0.136	0.135	0.103	0.136	0.086	0.111	0.106	0.003	0.004	0.074	0.055	0.064	0.066	0.087	0.078	0.106	0.101	0.115	0.121	0.132	0.082	0.059	0.106	0.108	0.109	0.129	0.111	0.137	0.149	0.005	0.006
4889	Form_5987	BCL2L13	bcl2l13.L	gnl|gene8176|XL-9_2-gene8176|rna23810|	380	101.6	EEAKEESPPPTPF	K.EESPPPTPFDTGK.I	Bcl-2-like protein 13						0.148	0.124	0.116	0.119	0.097	0.112	0.082	0.095	0.099	0.003	0.006	0.074	0.055	0.064	0.066	0.087	0.078	0.106	0.101	0.115	0.121	0.132	0.135	0.084	0.092	0.097	0.104	0.108	0.108	0.118	0.141	0.005	0.009
4889	Form_5988	BCL2L13	bcl2l13.L	gnl|gene8176|XL-9_2-gene8176|rna23810|	380;384	116.6	EEAKEESPPPTPF;EESPPPTPFDTGK	K.EESPPPTPFDTGK.I	Bcl-2-like protein 13						0.013	0.024	0.124	0.158	0.118	0.18	0.097	0.157	0.113	0.008	0.008	0.074	0.055	0.064	0.066	0.087	0.078	0.106	0.101	0.115	0.121	0.132	0.011	0.015	0.092	0.121	0.119	0.163	0.119	0.184	0.151	0.011	0.013
1748	Form_2153	BCL2L14	bcl2l14.S	gnl|gene18426|XL-9_2-gene18426|rna53822|	153	18.4	SFTRETSIEADGD	R.ETSIEADGDDNYEQLIK.E	Apoptosis facilitator Bcl-2-like protein 14						0.098	0.015	0.061	0.067	0.11	0.09	0.164	0.153	0.225	0.004	0.013	0.098	0.087	0.105	0.09	0.102	0.105	0.094	0.079	0.089	0.068	0.083	0.103	0.014	0.069	0.065	0.121	0.102	0.166	0.13	0.216	0.003	0.012
4939	Form_6049	BCL7A	bcl7a.S	gnl|gene8328|XL-9_2-gene8328|rna24242|	199	68.9	SGDKDITMETSKN	K.DITMETSK.N	B-cell CLL/lymphoma 7 protein family member A						0.01	0.014	0.067	0.023	0.029	0.024	0.024	0.027	0.029	0.281	0.472	0.088	0.079	0.083	0.129	0.108	0.106	0.075	0.089	0.086	0.089	0.066	0.011	0.014	0.07	0.037	0.039	0.032	0.023	0.031	0.032	0.317	0.395
4940	Form_6048	BCL7A	bcl7a.S	gnl|gene8328|XL-9_2-gene8328|rna24242|	209;213	49.1	SKNSQDSDDGTPP;QDSDDGTPPCKKV	K.NSQDSDDGTPPCK.K	B-cell CLL/lymphoma 7 protein family member A						0.048	0.029	0.097	0.074	0.108	0.114	0.147	0.149	0.223	0.001	0.01	0.088	0.079	0.083	0.129	0.108	0.106	0.075	0.089	0.086	0.089	0.066	0.046	0.025	0.087	0.104	0.127	0.131	0.12	0.144	0.208	0.001	0.007
101	Form__133	BCL9	bcl9.S	gnl|gene10447|XL-9_2-gene10447|rna30360|	76	24.7	NPKVRNSPSGNTQ	K.VRNSPSGNTQSSPK.S	B-cell CLL/lymphoma 9 protein	GN:BCL9|Bcl-9|human|O00512	0	11	NPKVRSSPSGNTQ	NaN	0.049	0.037	0.02	0.012	0.012	0.011	0.013	0.017	0.021	0.313	0.497	0.096	0.097	0.086	0.085	0.092	0.094	0.092	0.103	0.095	0.082	0.078	0.057	0.043	0.021	0.012	0.013	0.012	0.014	0.021	0.024	0.312	0.471
101	Form__138	BCL9	bcl9.S	gnl|gene10447|XL-9_2-gene10447|rna30360|	84	16.8	SGNTQSSPKSKQE	R.NSPSGNTQSSPK.S	B-cell CLL/lymphoma 9 protein	GN:BCL9|Bcl-9|human|O00512	0	19	SGNTQSSPKSKQE	NaN	0.228	0.242	0.118	0.024	0.058	0.064	0.076	0.09	0.089	0.005	0.007	0.096	0.097	0.086	0.085	0.092	0.094	0.092	0.103	0.095	0.082	0.078	0.232	0.248	0.107	0.022	0.056	0.064	0.074	0.098	0.089	0.004	0.006
102	Form__140	BCL9	bcl9.S	gnl|gene10447|XL-9_2-gene10447|rna30360|	127	139.4	ASQSQASPCDPKS	K.QGSSASQSQASPCDPK.S	B-cell CLL/lymphoma 9 protein	GN:BCL9|Bcl-9|human|O00512	0	62	ASQSQPSPCDSKS	NaN	0.013	0.009	0.121	0.152	0.111	0.154	0.113	0.124	0.11	0.041	0.052	0.096	0.097	0.086	0.085	0.092	0.094	0.092	0.103	0.095	0.082	0.078	0.014	0.01	0.114	0.142	0.112	0.159	0.114	0.14	0.115	0.037	0.045
103	Form__139	BCL9	bcl9.S	gnl|gene10447|XL-9_2-gene10447|rna30360|	165;170	106.9	KGKRERSISAESF;RSISAESFDQRDA	R.SISAESFDQR.D	B-cell CLL/lymphoma 9 protein						0.012	0.012	0.136	0.147	0.116	0.151	0.116	0.144	0.145	0.005	0.017	0.096	0.097	0.086	0.085	0.092	0.094	0.092	0.103	0.095	0.082	0.078	0.012	0.013	0.127	0.135	0.115	0.154	0.115	0.161	0.149	0.004	0.014
103	Form__141	BCL9	bcl9.S	gnl|gene10447|XL-9_2-gene10447|rna30360|	167;170	106.9	KRERSISAESFDQ;RSISAESFDQRDA	R.SISAESFDQR.D	B-cell CLL/lymphoma 9 protein						0.013	0.008	0.178	0.189	0.143	0.151	0.113	0.101	0.098	0.002	0.004	0.096	0.097	0.086	0.085	0.092	0.094	0.092	0.103	0.095	0.082	0.078	0.014	0.008	0.167	0.176	0.144	0.155	0.114	0.114	0.102	0.002	0.003
103	Form__142	BCL9	bcl9.S	gnl|gene10447|XL-9_2-gene10447|rna30360|	165	52.2	KGKRERSISAESF	R.SISAESFDQR.D	B-cell CLL/lymphoma 9 protein	GN:BCL9|Bcl-9|human|O00512	0	102	KGKRERSISADSF	NaN	0.034	0.042	0.196	0.172	0.115	0.104	0.102	0.108	0.117	0.001	0.009	0.096	0.097	0.086	0.085	0.092	0.094	0.092	0.103	0.095	0.082	0.078	0.036	0.044	0.184	0.16	0.116	0.107	0.102	0.121	0.121	0.001	0.008
103	Form__143	BCL9	bcl9.S	gnl|gene10447|XL-9_2-gene10447|rna30360|	170	106.9	RSISAESFDQRDA	R.SISAESFDQR.D	B-cell CLL/lymphoma 9 protein						0.057	0.035	0.103	0.09	0.123	0.135	0.144	0.136	0.156	0.006	0.014	0.096	0.097	0.086	0.085	0.092	0.094	0.092	0.103	0.095	0.082	0.078	0.059	0.037	0.095	0.082	0.122	0.137	0.143	0.151	0.159	0.005	0.012
104	Form__132	BCL9	bcl9.S	gnl|gene10447|XL-9_2-gene10447|rna30360|	301	113.5	ANPRAPTPQEQNH	R.APTPQEQNHSQAAK.V	B-cell CLL/lymphoma 9 protein						0.008	0.006	0.106	0.144	0.111	0.12	0.101	0.115	0.11	0.071	0.108	0.096	0.097	0.086	0.085	0.092	0.094	0.092	0.103	0.095	0.082	0.078	0.009	0.006	0.101	0.136	0.113	0.125	0.103	0.132	0.116	0.065	0.094
105	Form__134	BCL9	bcl9.S	gnl|gene10447|XL-9_2-gene10447|rna30360|	930;935	102.2	TMRQVQSPMLGSP;QSPMLGSPSGNLK	R.QVQSPMLGSPSGNLK.S	B-cell CLL/lymphoma 9 protein	GN:BCL9|Bcl-9|human|O00512	0	873	TMHQVQSPMLGSP	NaN	0.041	0.035	0.095	0.137	0.086	0.116	0.161	0.153	0.108	0.019	0.047	0.096	0.097	0.086	0.085	0.092	0.094	0.092	0.103	0.095	0.082	0.078	0.043	0.037	0.089	0.127	0.086	0.119	0.161	0.171	0.112	0.017	0.04
105	Form__136	BCL9	bcl9.S	gnl|gene10447|XL-9_2-gene10447|rna30360|	935	39.1	QSPMLGSPSGNLK	R.QVQSPMLGSPSGNLK.S	B-cell CLL/lymphoma 9 protein	GN:BCL9|Bcl-9|human|O00512	0	878	QSPMLGSPSGNLK	NaN	0.068	0.095	0.063	0.101	0.114	0.146	0.102	0.122	0.146	0.013	0.03	0.096	0.097	0.086	0.085	0.092	0.094	0.092	0.103	0.095	0.082	0.078	0.07	0.099	0.058	0.092	0.113	0.147	0.101	0.135	0.149	0.011	0.025
106	Form__135	BCL9	bcl9.S	gnl|gene10447|XL-9_2-gene10447|rna30360|	966;976	47.7	AAASIKSPPVMGS;MGSAAASPVHLKS	K.SPPVMGSAAASPVHLK.S	B-cell CLL/lymphoma 9 protein	GN:BCL9|Bcl-9|human|O00512	0	917	LGSAAASPVHLKS	NaN	0.041	0.028	0.136	0.131	0.137	0.156	0.098	0.118	0.126	0.01	0.018	0.096	0.097	0.086	0.085	0.092	0.094	0.092	0.103	0.095	0.082	0.078	0.043	0.03	0.127	0.121	0.137	0.159	0.098	0.132	0.13	0.009	0.015
106	Form__137	BCL9	bcl9.S	gnl|gene10447|XL-9_2-gene10447|rna30360|	966	41.2	AAASIKSPPVMGS	K.SPPVMGSAAASPVHLK.S	B-cell CLL/lymphoma 9 protein	GN:BCL9|Bcl-9|human|O00512	0	907	AAASIKSPPVLGS	NaN	0.043	0.028	0.114	0.128	0.108	0.125	0.132	0.148	0.124	0.025	0.025	0.096	0.097	0.086	0.085	0.092	0.094	0.092	0.103	0.095	0.082	0.078	0.045	0.029	0.106	0.118	0.108	0.127	0.131	0.165	0.128	0.022	0.021
1582	Form_1943	BDP1	bdp1.S	gnl|gene17549|XL-9_2-gene17549|rna51263|	545	51.4	EKENEESQAENVP	K.ENEESQAENVPTSLSGK.K	Transcription factor TFIIIB component B'' homolog						0.15	0.103	0.096	0.074	0.099	0.08	0.128	0.13	0.123	0.006	0.01	0.097	0.09	0.108	0.102	0.105	0.118	0.079	0.059	0.077	0.087	0.076	0.161	0.103	0.115	0.084	0.115	0.105	0.112	0.085	0.105	0.006	0.008
2404	Form_2966	BDP1	bdp1.L	gnl|gene2884|XL-9_2-gene2884|rna8376|	328	27.4	KTTGDKSPTAESQ	K.SPTAESQSAVPEK.K	Transcription factor TFIIIB component B'' homolog						0.087	0.053	0.124	0.162	0.17	0.243	0.052	0.052	0.05	0.003	0.004	0.06	0.066	0.076	0.053	0.057	0.042	0.12	0.122	0.145	0.127	0.131	0.077	0.052	0.14	0.127	0.144	0.151	0.093	0.094	0.107	0.006	0.008
2405	Form_2961	BDP1	bdp1.L	gnl|gene2884|XL-9_2-gene2884|rna8376|	532	16.2	ASAEQHSNLGDQE	K.ADEASAEQHSNLGDQESEAVDASTAEK.E	Transcription factor TFIIIB component B'' homolog						0.047	0.053	0.065	0.128	0.152	0.255	0.085	0.089	0.088	0.016	0.021	0.06	0.066	0.076	0.053	0.057	0.042	0.12	0.122	0.145	0.127	0.131	0.037	0.046	0.065	0.089	0.114	0.141	0.134	0.143	0.168	0.026	0.037
2406	Form_2962	BDP1	bdp1.L	gnl|gene2884|XL-9_2-gene2884|rna8376|	586	95	GELEDLSEGPNKK	K.DAESGELEDLSEGPNK.K	Transcription factor TFIIIB component B'' homolog						0.141	0.095	0.132	0.17	0.138	0.184	0.048	0.047	0.04	0.002	0.003	0.06	0.066	0.076	0.053	0.057	0.042	0.12	0.122	0.145	0.127	0.131	0.126	0.093	0.149	0.134	0.117	0.115	0.086	0.086	0.086	0.003	0.005
2407	Form_2967	BDP1	bdp1.L	gnl|gene2884|XL-9_2-gene2884|rna8376|	1325	19	PEKPKPSPTINAE	K.PKPSPTINAEADGNQR.H	Transcription factor TFIIIB component B'' homolog						0.021	0.015	0.077	0.205	0.175	0.285	0.066	0.066	0.04	0.023	0.026	0.06	0.066	0.076	0.053	0.057	0.042	0.12	0.122	0.145	0.127	0.131	0.018	0.014	0.085	0.157	0.144	0.173	0.115	0.117	0.084	0.043	0.05
2408	Form_2963	BDP1	bdp1.L	gnl|gene2884|XL-9_2-gene2884|rna8376|	1892	88.4	NDNVTDSPKLDAD	K.ATNDNVTDSPK.L	Transcription factor TFIIIB component B'' homolog						0.022	0.026	0.122	0.176	0.184	0.239	0.078	0.078	0.068	0.003	0.004	0.06	0.066	0.076	0.053	0.057	0.042	0.12	0.122	0.145	0.127	0.131	0.018	0.024	0.129	0.13	0.146	0.14	0.13	0.132	0.138	0.006	0.008
2409	Form_2965	BDP1	bdp1.L	gnl|gene2884|XL-9_2-gene2884|rna8376|	1930	46.3	RKAADKSSIVLSP	K.AADKSSIVLSPK.K	Transcription factor TFIIIB component B'' homolog						0.049	0.069	0.201	0.077	0.196	0.053	0.04	0.021	0.176	0.014	0.105	0.06	0.066	0.076	0.053	0.057	0.042	0.12	0.122	0.145	0.127	0.131	0.033	0.051	0.172	0.046	0.126	0.025	0.054	0.029	0.288	0.02	0.155
2410	Form_2964	BDP1	bdp1.L	gnl|gene2884|XL-9_2-gene2884|rna8376|	2056;2060	5000	LDVKDESFNLSPD;DESFNLSPDKVNK	K.DESFNLSPDK.V	Transcription factor TFIIIB component B'' homolog						0.089	0.081	0.127	0.193	0.139	0.224	0.05	0.056	0.038	0.001	0.002	0.06	0.066	0.076	0.053	0.057	0.042	0.12	0.122	0.145	0.127	0.131	0.08	0.08	0.145	0.153	0.119	0.141	0.09	0.103	0.083	0.001	0.004
2331	Form_2865	BICC1	bicc1.L	gnl|gene2612|XL-9_2-gene2612|rna7586|	698	19.1	ERLLSDSEMSPTE	R.LLSDSEMSPTEGPMTDK.K	Protein bicaudal C homolog 1						0.055	0.057	0.12	0.059	0.042	0.034	0.024	0.04	0.092	0.179	0.297	0.056	0.053	0.07	0.075	0.105	0.094	0.101	0.117	0.129	0.116	0.083	0.034	0.033	0.092	0.049	0.049	0.035	0.027	0.051	0.131	0.228	0.271
3574	Form_4388	BIN1	bin1.S	gnl|gene4425|XL-9_2-gene4425|rna12900|	315	36	KTNTNPSPPASDG	K.TNTNPSPPASDGPPAVSETK.T	Myc box-dependent-interacting protein 1						0.073	0.047	0.079	0.08	0.092	0.085	0.091	0.12	0.122	0.097	0.114	0.093	0.087	0.098	0.096	0.098	0.103	0.092	0.077	0.096	0.076	0.083	0.075	0.045	0.086	0.085	0.1	0.097	0.093	0.102	0.13	0.082	0.105
3574	Form_4389	BIN1	bin1.S	gnl|gene4425|XL-9_2-gene4425|rna12900|	315;319	56.1	KTNTNPSPPASDG;NPSPPASDGPPAV	K.TNTNPSPPASDGPPAVSETK.T	Myc box-dependent-interacting protein 1						0.039	0.014	0.05	0.077	0.098	0.099	0.112	0.167	0.311	0.013	0.02	0.093	0.087	0.098	0.096	0.098	0.103	0.092	0.077	0.096	0.076	0.083	0.039	0.013	0.053	0.08	0.104	0.11	0.111	0.139	0.322	0.011	0.018
2231	Form_2734	BIRC6	birc6.S	gnl|gene2350|XL-9_2-gene2350|rna6838|	837	76.3	SEETPLTPKHVNG	R.EDDCEESSEETPLTPK.H	Baculoviral IAP repeat-containing protein 6						0.008	0.019	0.152	0.121	0.11	0.116	0.116	0.101	0.099	0.084	0.073	0.092	0.087	0.091	0.097	0.099	0.1	0.087	0.088	0.088	0.083	0.088	0.008	0.018	0.151	0.128	0.119	0.127	0.11	0.097	0.095	0.076	0.07
2232	Form_2733	BIRC6	birc6.S	gnl|gene2350|XL-9_2-gene2350|rna6838|	2933	17.2	VSSTTESVSDEEK	R.APVVSSTTESVSDEEK.V	Baculoviral IAP repeat-containing protein 6						0.02	0.018	0.131	0.134	0.145	0.139	0.135	0.143	0.118	0.008	0.007	0.092	0.087	0.091	0.097	0.099	0.1	0.087	0.088	0.088	0.083	0.088	0.02	0.017	0.129	0.14	0.155	0.15	0.127	0.136	0.112	0.007	0.007
2232	Form_2735	BIRC6	birc6.S	gnl|gene2350|XL-9_2-gene2350|rna6838|	2935	75.4	STTESVSDEEKVY	R.APVVSSTTESVSDEEK.V	Baculoviral IAP repeat-containing protein 6	GN:BIRC6|BIRC6|human|Q9NR09	0	2955	NTTDSVSDEEKVS	NaN	0.127	0.08	0.113	0.101	0.104	0.108	0.101	0.1	0.114	0.018	0.033	0.092	0.087	0.091	0.097	0.099	0.1	0.087	0.088	0.088	0.083	0.088	0.127	0.076	0.112	0.107	0.112	0.117	0.096	0.096	0.109	0.016	0.032
2233	Form_2736	BIRC6	birc6.S	gnl|gene2350|XL-9_2-gene2350|rna6838|	3571	63.2	KQDLNASLTDDSK	K.QDLNASLTDDSK.N	Baculoviral IAP repeat-containing protein 6	GN:BIRC6|BIRC6|human|Q9NR09	0	3591	KQDLSSSLTDDSK	NaN	0.009	0.012	0.173	0.147	0.149	0.155	0.117	0.103	0.109	0.009	0.018	0.092	0.087	0.091	0.097	0.099	0.1	0.087	0.088	0.088	0.083	0.088	0.009	0.011	0.169	0.153	0.158	0.166	0.109	0.097	0.103	0.008	0.017
2233	Form_2737	BIRC6	birc6.S	gnl|gene2350|XL-9_2-gene2350|rna6838|	3573	18.1	DLNASLTDDSKNA	K.QDLNASLTDDSK.N	Baculoviral IAP repeat-containing protein 6	GN:BIRC6|BIRC6|human|Q9NR09	0	3593	DLSSSLTDDSKNA	NaN	0.003	0.009	0.213	0.138	0.176	0.141	0.115	0.085	0.111	0.003	0.005	0.092	0.087	0.091	0.097	0.099	0.1	0.087	0.088	0.088	0.083	0.088	0.003	0.008	0.208	0.143	0.187	0.151	0.107	0.08	0.105	0.003	0.005
2642	Form_3252	BIRC6	LOC108716679	gnl|gene35046|XL-9_2-gene35046|rna74826|	426	120.6	PKLEGDSDDLLDY	K.LEGDSDDLLDYSDSEER.S	Baculoviral IAP repeat-containing protein 6	GN:BIRC6|BIRC6|human|Q9NR09	0	473	PKLEGDSDDLLED	NaN	0.297	0.144	0.115	0.096	0.061	0.042	0.063	0.086	0.082	0.003	0.012	0.088	0.122	0.099	0.091	0.104	0.146	0.095	0.059	0.064	0.059	0.072	0.28	0.188	0.122	0.093	0.068	0.065	0.064	0.054	0.056	0.002	0.009
2643	Form_3251	BIRC6	LOC108716679	gnl|gene35046|XL-9_2-gene35046|rna74826|	2931	50.7	VSSTTNSVSDEEK	R.VPVVSSTTNSVSDEEK.V	Baculoviral IAP repeat-containing protein 6						0.007	0.006	0.086	0.122	0.134	0.102	0.131	0.208	0.189	0.004	0.009	0.088	0.122	0.099	0.091	0.104	0.146	0.095	0.059	0.064	0.059	0.072	0.007	0.009	0.097	0.127	0.159	0.17	0.142	0.14	0.138	0.003	0.007
692	Form__864	BLM	blm.L	gnl|gene13216|XL-9_2-gene13216|rna38469|	425	42	ENLSGSSLNKVFK	K.GAENLSGSSLNK.V	DNA helicase						0.037	0.025	0.112	0.098	0.078	0.146	0.123	0.212	0.131	0.011	0.027	0.084	0.085	0.101	0.097	0.099	0.107	0.09	0.085	0.091	0.08	0.08	0.033	0.023	0.121	0.102	0.083	0.167	0.118	0.193	0.127	0.009	0.023
4252	Form_5219	BLNK	blnk.S	gnl|gene51022|XL-9_2-gene51022|rna97762|	193	5000	LHNGTKSLPLPVP	K.SLPLPVPKPPLPK.Q	B-cell linker protein						0.045	0.069	0.061	0.092	0.086	0.089	0.199	0.17	0.136	0.029	0.023	0.162	0.133	0.153	0.094	0.106	0.085	0.043	0.042	0.046	0.05	0.085	0.096	0.119	0.122	0.113	0.119	0.099	0.112	0.093	0.082	0.019	0.026
4253	Form_5218	BLNK	blnk.S	gnl|gene51022|XL-9_2-gene51022|rna97762|	383	32.5	DRNRTPSVGADLP	R.NRTPSVGADLPPLPHSAQK.L	B-cell linker protein						0.007	0.031	0.087	0.152	0.136	0.147	0.175	0.138	0.098	0.017	0.011	0.162	0.133	0.153	0.094	0.106	0.085	0.043	0.042	0.046	0.05	0.085	0.014	0.052	0.168	0.18	0.181	0.157	0.095	0.073	0.057	0.011	0.012
4216	Form_5172	BMS1	bms1.L	gnl|gene50783|XL-9_2-gene50783|rna97436|	606	21.7	LDSGNCTDDDGNS	K.ATPTLDSGNCTDDDGNSSK.S	Ribosome biogenesis protein BMS1 homolog						0.035	0.016	0.024	0.021	0.02	0.021	0.021	0.018	0.038	0.311	0.475	0.095	0.092	0.087	0.079	0.09	0.082	0.091	0.096	0.102	0.083	0.103	0.035	0.016	0.022	0.018	0.019	0.018	0.02	0.018	0.041	0.274	0.519
813	Form_1002	BOD1L1	bod1l1.L	gnl|gene13802|XL-9_2-gene13802|rna40184|	784	47	LSSDDKSESDIAR	K.LSSDDKSESDIAR.T	Biorientation of chromosomes in cell division protein 1-like 1						0.228	0.138	0.152	0.105	0.087	0.075	0.067	0.06	0.077	0.004	0.006	0.087	0.084	0.103	0.095	0.097	0.093	0.092	0.093	0.087	0.082	0.087	0.216	0.126	0.17	0.108	0.092	0.076	0.067	0.061	0.073	0.004	0.006
814	Form_1000	BOD1L1	bod1l1.L	gnl|gene13802|XL-9_2-gene13802|rna40184|	2353	90.2	PPNRQLSLEEGEG	R.QLSLEEGEGAVTSTGITEESDR.A	Biorientation of chromosomes in cell division protein 1-like 1						0.026	0.016	0.039	0.068	0.109	0.136	0.143	0.212	0.223	0.009	0.018	0.087	0.084	0.103	0.095	0.097	0.093	0.092	0.093	0.087	0.082	0.087	0.025	0.015	0.044	0.07	0.115	0.138	0.143	0.214	0.211	0.008	0.017
815	Form_1004	BOD1L1	bod1l1.L	gnl|gene13802|XL-9_2-gene13802|rna40184|	2762	40.8	KNYLNLTNGQEEE	K.NYLNLTNGQEEEVEIPTIQQPK.T	Biorientation of chromosomes in cell division protein 1-like 1						0.029	0.014	0.055	0.085	0.086	0.09	0.114	0.127	0.163	0.13	0.106	0.087	0.084	0.103	0.095	0.097	0.093	0.092	0.093	0.087	0.082	0.087	0.028	0.013	0.063	0.089	0.092	0.092	0.116	0.131	0.157	0.118	0.102
816	Form__999	BOD1L1	bod1l1.L	gnl|gene13802|XL-9_2-gene13802|rna40184|	2978;2980	29	GRKPKRSLSSSES;KPKRSLSSSESEP	K.RSLSSSESEPEK.K	Biorientation of chromosomes in cell division protein 1-like 1						0.019	0.008	0.109	0.137	0.188	0.152	0.139	0.109	0.133	0.002	0.003	0.087	0.084	0.103	0.095	0.097	0.093	0.092	0.093	0.087	0.082	0.087	0.018	0.007	0.12	0.139	0.194	0.151	0.136	0.108	0.123	0.002	0.003
816	Form_1003	BOD1L1	bod1l1.L	gnl|gene13802|XL-9_2-gene13802|rna40184|	2980	21.5	KPKRSLSSSESEP	K.RSLSSSESEPEK.K	Biorientation of chromosomes in cell division protein 1-like 1						0.206	0.182	0.146	0.131	0.081	0.077	0.054	0.052	0.043	0.008	0.019	0.087	0.084	0.103	0.095	0.097	0.093	0.092	0.093	0.087	0.082	0.087	0.196	0.167	0.164	0.136	0.086	0.078	0.054	0.053	0.041	0.007	0.018
817	Form_1001	BOD1L1	bod1l1.L	gnl|gene13802|XL-9_2-gene13802|rna40184|	3101	185.1	QTSEEITPKRTKR	R.GQQTSEEITPK.R	Biorientation of chromosomes in cell division protein 1-like 1						0.018	0.017	0.099	0.111	0.089	0.09	0.088	0.087	0.092	0.107	0.201	0.087	0.084	0.103	0.095	0.097	0.093	0.092	0.093	0.087	0.082	0.087	0.017	0.016	0.112	0.115	0.094	0.092	0.089	0.089	0.088	0.096	0.191
4735	Form_5812	BOLA1	bola1.L	gnl|gene7538|XL-9_2-gene7538|rna21971|	124	136.5	NPAVSKSPACMGG	K.SPACMGGSK.H	BolA-like protein 1						0.011	0.016	0.123	0.129	0.097	0.131	0.135	0.166	0.153	0.017	0.022	0.099	0.083	0.102	0.103	0.128	0.114	0.082	0.081	0.083	0.055	0.069	0.011	0.014	0.132	0.14	0.13	0.157	0.116	0.141	0.133	0.01	0.016
3082	Form_3784	BOP1	bop1.L	gnl|gene39674|XL-9_2-gene39674|rna81341|	22	127.3	EPEPLFSEENRSL	K.RESGGPLTEEPEPLFSEENR.S	Ribosome biogenesis protein BOP1						0.179	0.144	0.101	0.109	0.093	0.088	0.08	0.098	0.092	0.009	0.007	0.089	0.086	0.096	0.099	0.097	0.1	0.092	0.089	0.085	0.084	0.083	0.174	0.135	0.106	0.118	0.098	0.096	0.08	0.095	0.085	0.008	0.006
1031	Form_1279	BORA	bora.S	gnl|gene1470|XL-9_2-gene1470|rna4282|	9;12	72.7	DVRTQLTPETPGR;TQLTPETPGRAAI	R.TQLTPETPGR.A	Protein aurora borealis						0.004	0.012	0.201	0.173	0.103	0.136	0.106	0.118	0.109	0.015	0.023	0.097	0.098	0.082	0.083	0.09	0.085	0.089	0.088	0.093	0.09	0.105	0.004	0.014	0.189	0.165	0.107	0.133	0.108	0.119	0.116	0.016	0.028
1032	Form_1276	BORA	bora.S	gnl|gene1470|XL-9_2-gene1470|rna4282|	189	21	DNLSSSSLRRKLF	R.AEETADQSQDNLSSSSLR.R	Protein aurora borealis	GN:BORA|BORA|human|Q6PGQ7	0	191	GNLSSSSLRRKLF	NaN	0.023	0.006	0.071	0.091	0.134	0.144	0.142	0.179	0.193	0.004	0.013	0.097	0.098	0.082	0.083	0.09	0.085	0.089	0.088	0.093	0.09	0.105	0.025	0.007	0.066	0.085	0.136	0.138	0.143	0.178	0.202	0.004	0.015
1033	Form_1278	BORA	bora.S	gnl|gene1470|XL-9_2-gene1470|rna4282|	285;294	101.4	VTSPSFSPIAINL;AINLGKTPDAEQK	K.SPASVTSPSFSPIAINLGKTPDAEQK.R	Protein aurora borealis						0.01	0.006	0.007	0.007	0.009	0.016	0.022	0.032	0.032	0.367	0.492	0.097	0.098	0.082	0.083	0.09	0.085	0.089	0.088	0.093	0.09	0.105	0.01	0.006	0.006	0.006	0.008	0.014	0.02	0.029	0.031	0.34	0.531
1034	Form_1280	BORA	bora.S	gnl|gene1470|XL-9_2-gene1470|rna4282|	521	49.5	ENDTHISDIQNKC	K.ENDTHISDIQNK.C	Protein aurora borealis						0.03	0.026	0.15	0.108	0.122	0.139	0.112	0.11	0.156	0.023	0.023	0.097	0.098	0.082	0.083	0.09	0.085	0.089	0.088	0.093	0.09	0.105	0.033	0.029	0.14	0.102	0.125	0.134	0.113	0.11	0.165	0.023	0.028
1035	Form_1277	BORA	bora.S	gnl|gene1470|XL-9_2-gene1470|rna4282|	549	27.9	QLLEPESPEFQHS	K.NQLLEPESPEFQHSTQK.S	Protein aurora borealis						0.042	0.036	0.108	0.11	0.109	0.122	0.119	0.13	0.177	0.016	0.03	0.097	0.098	0.082	0.083	0.09	0.085	0.089	0.088	0.093	0.09	0.105	0.046	0.04	0.1	0.103	0.11	0.117	0.119	0.129	0.185	0.016	0.035
1757	Form_2164	BORCS5	borcs5.L	gnl|gene18462|XL-9_2-gene18462|rna53916|	21	16.8	DVSSSASPSPAKQ	R.QNDVSSSASPSPAK.Q	BLOC-1-related complex subunit 5						0.022	0.019	0.153	0.124	0.164	0.129	0.119	0.101	0.116	0.019	0.034	0.092	0.094	0.105	0.099	0.098	0.099	0.092	0.089	0.083	0.079	0.072	0.021	0.019	0.17	0.13	0.17	0.135	0.116	0.095	0.102	0.016	0.026
3012	Form_3700	BPTF	LOC108701207	gnl|gene38949|XL-9_2-gene38949|rna80352|	99	85.3	VYDDHESEEEEDG	K.VVYDDHESEEEEDGEPGGR.R	Nucleosome-remodeling factor subunit BPTF (Fragment)						0.089	0.071	0.11	0.117	0.103	0.12	0.105	0.148	0.117	0.008	0.012	0.105	0.1	0.101	0.101	0.095	0.101	0.086	0.082	0.079	0.073	0.076	0.1	0.076	0.119	0.127	0.105	0.13	0.097	0.13	0.099	0.006	0.01
4218	Form_5175	BPTF	LOC108702156	gnl|gene50851|XL-9_2-gene50851|rna97527|	550	35.2	EDEKVKSETENPE	K.VKSETENPEEK.A	Nucleosome-remodeling factor subunit BPTF (Fragment)						0.122	0.092	0.126	0.115	0.108	0.119	0.092	0.102	0.093	0.014	0.018	0.094	0.091	0.098	0.094	0.095	0.096	0.091	0.088	0.089	0.08	0.084	0.124	0.09	0.133	0.116	0.11	0.123	0.09	0.097	0.089	0.012	0.016
4219	Form_5174	BPTF	LOC108702156	gnl|gene50851|XL-9_2-gene50851|rna97527|	2196	71.7	RTPIQQSPVGKSY	R.TPIQQSPVGK.S	Nucleosome-remodeling factor subunit BPTF (Fragment)						0.036	0.043	0.169	0.148	0.118	0.137	0.108	0.113	0.079	0.02	0.03	0.094	0.091	0.098	0.094	0.095	0.096	0.091	0.088	0.089	0.08	0.084	0.036	0.042	0.178	0.149	0.12	0.141	0.106	0.107	0.076	0.017	0.027
4220	Form_5176	BPTF	LOC108702156	gnl|gene50851|XL-9_2-gene50851|rna97527|	2262	43.7	PQPQATTPQAAKP	K.VSTPIQQPQPQATTPQAAK.P	Nucleosome-remodeling factor subunit BPTF (Fragment)						0.006	0.013	0.141	0.13	0.112	0.13	0.109	0.13	0.117	0.034	0.078	0.094	0.091	0.098	0.094	0.095	0.096	0.091	0.088	0.089	0.08	0.084	0.006	0.013	0.15	0.133	0.116	0.136	0.108	0.124	0.113	0.03	0.071
521	Form__660	BRAF	braf.S	gnl|gene12377|XL-9_2-gene12377|rna35988|	144	5000	SRINPKSPQKPIV	K.SPQKPIVR.V	Non-specific serine/threonine protein kinase	GN:BRAF|BRAF|human|P15056	0	151	ARSNPKSPQKPIV	3	0.108	0.089	0.156	0.127	0.108	0.095	0.111	0.092	0.099	0.004	0.011	0.089	0.095	0.087	0.091	0.093	0.104	0.082	0.094	0.084	0.094	0.086	0.106	0.093	0.15	0.128	0.111	0.109	0.101	0.096	0.092	0.004	0.01
522	Form__659	BRAF	braf.S	gnl|gene12377|XL-9_2-gene12377|rna35988|	428	21.3	PVCRGSTPGLSAT	R.GSTPGLSATPPASLPGSLTNVK.A	Non-specific serine/threonine protein kinase						0.049	0.057	0.137	0.195	0.132	0.096	0.073	0.081	0.06	0.039	0.08	0.089	0.095	0.087	0.091	0.093	0.104	0.082	0.094	0.084	0.094	0.086	0.048	0.06	0.131	0.195	0.135	0.11	0.066	0.084	0.055	0.04	0.076
2109	Form_2580	BRAF	braf.L	gnl|gene20156|XL-9_2-gene20156|rna58817|	428;434	45.3	PVCRGSTPGLSAT;TPGLSATPPASLP	R.GSTPGLSATPPASLPGSLANVK.A	Non-specific serine/threonine protein kinase						0.025	0.071	0.165	0.139	0.097	0.092	0.092	0.058	0.075	0.084	0.101	0.097	0.084	0.107	0.092	0.102	0.102	0.086	0.082	0.096	0.071	0.081	0.026	0.065	0.191	0.139	0.107	0.102	0.086	0.052	0.078	0.065	0.089
2109	Form_2581	BRAF	braf.L	gnl|gene20156|XL-9_2-gene20156|rna58817|	434	45.3	TPGLSATPPASLP	R.GSTPGLSATPPASLPGSLANVK.A	Non-specific serine/threonine protein kinase	GN:BRAF|BRAF|human|P15056	0	401	TTGLSATPPASLP	3	0.01	0.085	0.186	0.157	0.088	0.086	0.072	0.063	0.055	0.078	0.12	0.097	0.084	0.107	0.092	0.102	0.102	0.086	0.082	0.096	0.071	0.081	0.011	0.078	0.216	0.157	0.098	0.095	0.067	0.056	0.057	0.06	0.106
547	Form__693	BRAP	brap.L	gnl|gene12491|XL-9_2-gene12491|rna36320|	115	39.7	AMAVPDSPSKQLP	K.TSLEEQGTCAMAVPDSPSK.Q	BRCA1-associated protein	GN:BRAP|BRAP|human|Q7Z569	0	117	INAAPDSPSKQLP	NaN	0.093	0.085	0.105	0.134	0.115	0.129	0.101	0.125	0.107	0.003	0.004	0.081	0.089	0.075	0.081	0.085	0.089	0.093	0.101	0.09	0.108	0.109	0.086	0.087	0.09	0.124	0.112	0.131	0.107	0.144	0.11	0.004	0.005
4581	Form_5621	BRCA1	brca1.L	gnl|gene6724|XL-9_2-gene6724|rna19687|	1077	5000	LQDELVSPNKTKR	K.QDVLQDELVSPNK.T	Breast cancer type 1 susceptibility protein (Fragment)						0.083	0.054	0.134	0.115	0.112	0.096	0.122	0.108	0.113	0.025	0.04	0.111	0.114	0.117	0.113	0.102	0.094	0.073	0.061	0.072	0.067	0.077	0.1	0.066	0.169	0.14	0.123	0.097	0.096	0.071	0.088	0.018	0.033
4582	Form_5619	BRCA1	brca1.L	gnl|gene6724|XL-9_2-gene6724|rna19687|	1285	35.9	LETVNVTPTNPID	R.SDLETVNVTPTNPIDAQESLRQSSK.N	Breast cancer type 1 susceptibility protein (Fragment)						0.004	0.006	0.137	0.167	0.123	0.126	0.137	0.161	0.122	0.008	0.008	0.111	0.114	0.117	0.113	0.102	0.094	0.073	0.061	0.072	0.067	0.077	0.005	0.007	0.178	0.209	0.139	0.131	0.111	0.109	0.097	0.006	0.007
4582	Form_5620	BRCA1	brca1.L	gnl|gene6724|XL-9_2-gene6724|rna19687|	1287;1299	14.4	TVNVTPTNPIDAQ;QESLRQSSKNKRG	R.SDLETVNVTPTNPIDAQESLRQSSK.N	Breast cancer type 1 susceptibility protein (Fragment)						0.005	0.005	0.138	0.169	0.112	0.149	0.131	0.162	0.118	0.004	0.007	0.111	0.114	0.117	0.113	0.102	0.094	0.073	0.061	0.072	0.067	0.077	0.006	0.006	0.178	0.211	0.126	0.155	0.106	0.109	0.094	0.003	0.006
3984	Form_4894	BRCA2	LOC108708691	gnl|gene48247|XL-9_2-gene48247|rna93765|	1237	5000	DVDLNDSFAAGRD	K.DVDLNDSFAAGR.D	Breast cancer type 2 susceptibility protein						0.022	0.039	0.107	0.151	0.121	0.144	0.118	0.165	0.101	0.014	0.017	0.101	0.105	0.103	0.094	0.106	0.11	0.081	0.079	0.086	0.066	0.071	0.024	0.044	0.117	0.151	0.137	0.169	0.102	0.139	0.093	0.01	0.013
3985	Form_4895	BRCA2	LOC108708691	gnl|gene48247|XL-9_2-gene48247|rna93765|	1897	48.3	MKKSIQTPLTTEK	K.SIQTPLTTEK.A	Breast cancer type 2 susceptibility protein						0.003	0.005	0.27	0.193	0.07	0.11	0.102	0.128	0.065	0.026	0.028	0.101	0.105	0.103	0.094	0.106	0.11	0.081	0.079	0.086	0.066	0.071	0.003	0.006	0.296	0.193	0.079	0.129	0.088	0.108	0.06	0.018	0.021
3986	Form_4896	BRCA2	LOC108708691	gnl|gene48247|XL-9_2-gene48247|rna93765|	2202	63.3	QSLSIKSPDVLSA	K.SPDVLSAPTPK.S	Breast cancer type 2 susceptibility protein						0.034	0.05	0.176	0.177	0.129	0.107	0.102	0.109	0.09	0.01	0.017	0.101	0.105	0.103	0.094	0.106	0.11	0.081	0.079	0.086	0.066	0.071	0.036	0.055	0.19	0.175	0.143	0.123	0.087	0.09	0.081	0.007	0.013
3987	Form_4897	BRCA2	LOC108708691	gnl|gene48247|XL-9_2-gene48247|rna93765|	3086;3098	39.3	FLSRIPSPPPVTP;PVRPLVSPSLQKA	R.IPSPPPVTPVRPLVSPSLQK.A	Breast cancer type 2 susceptibility protein						0.012	0.031	0.066	0.102	0.121	0.117	0.14	0.161	0.12	0.069	0.062	0.101	0.105	0.103	0.094	0.106	0.11	0.081	0.079	0.086	0.066	0.071	0.013	0.036	0.076	0.107	0.143	0.143	0.126	0.142	0.115	0.051	0.049
3440	Form_4236	BRD2	brd2.S	gnl|gene42903|XL-9_2-gene42903|rna86032|	578	29.9	ATSSTISPAVSKS	K.SGGGIATSSTISPAVSK.S	Bromodomain-containing protein 2						0.055	0.056	0.111	0.072	0.116	0.111	0.131	0.127	0.183	0.021	0.016	0.116	0.068	0.077	0.113	0.101	0.104	0.085	0.099	0.078	0.074	0.084	0.07	0.042	0.094	0.089	0.129	0.127	0.122	0.138	0.157	0.017	0.015
3441	Form_4237	BRD2	brd2.S	gnl|gene42903|XL-9_2-gene42903|rna86032|	602	22.9	PSVLYDSEEEEES	K.SLPPPPSVLYDSEEEEESK.P	Bromodomain-containing protein 2						0.092	0.054	0.046	0.171	0.175	0.107	0.13	0.094	0.118	0.004	0.01	0.116	0.068	0.077	0.113	0.101	0.104	0.085	0.099	0.078	0.074	0.084	0.11	0.038	0.037	0.2	0.183	0.115	0.114	0.096	0.095	0.003	0.009
402	Form__518	BRD4	brd4.S	gnl|gene11939|XL-9_2-gene11939|rna34670|	235	41.7	MRTRVLSGSLEDK	R.TRVLSGSLEDK.S	Bromodomain-containing protein 4						0.066	0.056	0.095	0.124	0.131	0.111	0.126	0.153	0.129	0.003	0.007	0.084	0.081	0.09	0.09	0.098	0.109	0.093	0.086	0.096	0.091	0.083	0.06	0.049	0.092	0.12	0.138	0.13	0.126	0.142	0.134	0.003	0.006
403	Form__519	BRD4	brd4.S	gnl|gene11939|XL-9_2-gene11939|rna34670|	661;662	26.9	PSAPCESSEEETQ;SAPCESSEEETQR	R.PARPAPPSAPCESSEEETQR.C	Bromodomain-containing protein 4						0.091	0.057	0.118	0.114	0.116	0.11	0.113	0.136	0.116	0.011	0.018	0.084	0.081	0.09	0.09	0.098	0.109	0.093	0.086	0.096	0.091	0.083	0.083	0.05	0.115	0.111	0.123	0.13	0.114	0.127	0.121	0.011	0.016
614	Form__770	BRD4	brd4.L	gnl|gene12898|XL-9_2-gene12898|rna37476|	198	37.7	MRTRVLSGSLGDK	R.VLSGSLGDK.S	Bromodomain-containing protein 4						0.038	0.032	0.144	0.157	0.113	0.133	0.12	0.151	0.102	0.003	0.008	0.102	0.089	0.069	0.065	0.087	0.097	0.096	0.094	0.106	0.112	0.081	0.044	0.033	0.114	0.117	0.113	0.148	0.132	0.163	0.124	0.004	0.007
4961	Form_6077	BRD7	brd7.L	gnl|gene8414|XL-9_2-gene8414|rna24497|	268	36.9	KWDPQVSGDGTQE	K.DKWDPQVSGDGTQEPQK.D	Bromodomain-containing protein 7						0.03	0.017	0.085	0.089	0.121	0.135	0.147	0.126	0.214	0.012	0.022	0.078	0.087	0.086	0.087	0.105	0.095	0.098	0.1	0.093	0.087	0.084	0.025	0.016	0.077	0.082	0.135	0.136	0.153	0.134	0.211	0.011	0.02
4962	Form_6075	BRD7	brd7.L	gnl|gene8414|XL-9_2-gene8414|rna24497|	291	42.9	EVATFRSPVKDQK	K.DESMDTDEVATFRSPVK.D	Bromodomain-containing protein 7						0.165	0.066	0.093	0.078	0.06	0.056	0.057	0.045	0.075	0.118	0.189	0.078	0.087	0.086	0.087	0.105	0.095	0.098	0.1	0.093	0.087	0.084	0.146	0.065	0.091	0.077	0.071	0.06	0.063	0.051	0.079	0.117	0.18
4962	Form_6076	BRD7	brd7.L	gnl|gene8414|XL-9_2-gene8414|rna24497|	280	22.7	EPQKDESMDTDEV	K.DESMDTDEVATFRSPVK.D	Bromodomain-containing protein 7						0.057	0.016	0.067	0.069	0.059	0.091	0.191	0.208	0.227	0.003	0.01	0.078	0.087	0.086	0.087	0.105	0.095	0.098	0.1	0.093	0.087	0.084	0.047	0.015	0.061	0.064	0.066	0.092	0.198	0.22	0.224	0.003	0.009
781	Form__964	BRF1	brf1.L	gnl|gene13586|XL-9_2-gene13586|rna39539|	563	125.3	INSNQLSRRKSAA	K.NDMEDGINSNQLSR.R	Transcription factor IIIB 90 kDa subunit						0.009	0.013	0.283	0.193	0.097	0.148	0.101	0.083	0.06	0.005	0.008	0.108	0.106	0.117	0.086	0.09	0.087	0.085	0.086	0.083	0.073	0.08	0.01	0.014	0.347	0.174	0.091	0.135	0.09	0.075	0.052	0.004	0.007
782	Form__965	BRF1	brf1.L	gnl|gene13586|XL-9_2-gene13586|rna39539|	574	35.2	AASRSLSNPVSNA	R.SLSNPVSNAAK.R	Transcription factor IIIB 90 kDa subunit						0.024	0.014	0.104	0.117	0.127	0.128	0.131	0.157	0.18	0.006	0.012	0.108	0.106	0.117	0.086	0.09	0.087	0.085	0.086	0.083	0.073	0.08	0.029	0.016	0.135	0.112	0.127	0.124	0.124	0.15	0.166	0.005	0.011
4914	Form_6018	BRI3BP	bri3bp.S	gnl|gene8245|XL-9_2-gene8245|rna24006|	201	27.9	LYWRRSSTNNLED	R.SSTNNLEDK.I	BRI3-binding protein						0.059	0.08	0.189	0.118	0.162	0.108	0.098	0.077	0.098	0.005	0.006	0.084	0.075	0.069	0.068	0.066	0.08	0.104	0.106	0.117	0.106	0.125	0.06	0.073	0.158	0.097	0.13	0.105	0.124	0.099	0.139	0.006	0.009
191	Form__245	BRIP1	brip1.L	gnl|gene10837|XL-9_2-gene10837|rna31496|	142	15.9	CAKKQASFTTDQD	K.QASFTTDQDDDFQTDRK.R	Fanconi anemia group J protein						0.026	0.008	0.143	0.08	0.161	0.089	0.154	0.11	0.209	0.005	0.014	0.077	0.08	0.088	0.086	0.092	0.1	0.101	0.101	0.102	0.094	0.079	0.021	0.007	0.132	0.072	0.155	0.093	0.163	0.117	0.224	0.005	0.012
1769	Form_2178	BSDC1	bsdc1.L	gnl|gene18500|XL-9_2-gene18500|rna54009|	401;403;406	85.1	NNGQKGSSTDISE;GQKGSSTDISEDW;GSSTDISEDWEKE	K.GSSTDISEDWEK.E	BSD domain-containing protein 1						0.032	0.014	0.048	0.067	0.11	0.115	0.148	0.168	0.281	0.006	0.012	0.091	0.095	0.1	0.088	0.099	0.107	0.091	0.089	0.087	0.076	0.077	0.032	0.014	0.052	0.064	0.118	0.133	0.146	0.162	0.265	0.005	0.01
1769	Form_2179	BSDC1	bsdc1.L	gnl|gene18500|XL-9_2-gene18500|rna54009|	401	41.3	NNGQKGSSTDISE	K.GSSTDISEDWEK.E	BSD domain-containing protein 1						0.054	0.048	0.093	0.196	0.106	0.184	0.098	0.156	0.06	0.004	0.002	0.091	0.095	0.1	0.088	0.099	0.107	0.091	0.089	0.087	0.076	0.077	0.052	0.048	0.098	0.182	0.111	0.208	0.094	0.147	0.055	0.003	0.002
1769	Form_2180	BSDC1	bsdc1.L	gnl|gene18500|XL-9_2-gene18500|rna54009|	401;406	85.1	NNGQKGSSTDISE;GSSTDISEDWEKE	K.GSSTDISEDWEK.E	BSD domain-containing protein 1	GN:BSDC1|BSDC1|human|Q9NW68	0	387	NNGKKGSSTDISE	NaN	0.038	0.02	0.052	0.097	0.085	0.135	0.108	0.249	0.203	0.011	0.004	0.091	0.095	0.1	0.088	0.099	0.107	0.091	0.089	0.087	0.076	0.077	0.037	0.021	0.056	0.092	0.091	0.156	0.106	0.24	0.191	0.009	0.003
1769	Form_2181	BSDC1	bsdc1.L	gnl|gene18500|XL-9_2-gene18500|rna54009|	402	14.7	NGQKGSSTDISED	K.GSSTDISEDWEK.E	BSD domain-containing protein 1						0.021	0.028	0.097	0.16	0.128	0.175	0.121	0.159	0.103	0.004	0.004	0.091	0.095	0.1	0.088	0.099	0.107	0.091	0.089	0.087	0.076	0.077	0.02	0.028	0.103	0.149	0.134	0.198	0.116	0.15	0.095	0.003	0.003
1769	Form_2182	BSDC1	bsdc1.L	gnl|gene18500|XL-9_2-gene18500|rna54009|	406	85.1	GSSTDISEDWEKE	K.GSSTDISEDWEK.E	BSD domain-containing protein 1						0.039	0.02	0.055	0.091	0.096	0.135	0.128	0.195	0.223	0.006	0.012	0.091	0.095	0.1	0.088	0.099	0.107	0.091	0.089	0.087	0.076	0.077	0.038	0.021	0.059	0.086	0.103	0.156	0.126	0.187	0.209	0.005	0.01
3484	Form_4286	BSDC1	bsdc1.S	gnl|gene43172|XL-9_2-gene43172|rna86441|	381	89.9	GSSTDVSEDWEKD	K.GSSTDVSEDWEK.D	BSD domain-containing protein 1	GN:BSDC1|BSDC1|human|Q9NW68	0	392	GSSTDISEDWEKD	NaN	0.038	0.024	0.065	0.095	0.098	0.131	0.114	0.187	0.226	0.007	0.015	0.103	0.098	0.104	0.088	0.104	0.105	0.1	0.085	0.08	0.066	0.067	0.042	0.026	0.073	0.091	0.111	0.149	0.124	0.172	0.196	0.005	0.011
5210	Form_6379	BTBD8	btbd8.L	gnl|gene9692|XL-9_2-gene9692|rna28198|	1217	14.7	DLFRVNSTSDDEV	R.VNSTSDDEVPQK.R	BTB/POZ domain-containing protein 8	GN:KIAA1107|KIAA1107|human|Q9UPP5	0	953	DLFQVNSTSDDEI	NaN	0.052	0.093	0.152	0.122	0.118	0.115	0.124	0.101	0.114	0.003	0.007	0.104	0.087	0.113	0.106	0.103	0.095	0.08	0.086	0.083	0.076	0.067	0.057	0.085	0.18	0.135	0.127	0.114	0.104	0.091	0.099	0.002	0.005
5211	Form_6380	BTBD8	btbd8.L	gnl|gene9692|XL-9_2-gene9692|rna28198|	1512	40.7	RPSKSLSPIYEVD	K.SLSPIYEVDPGQGIEQNK.N	BTB/POZ domain-containing protein 8	GN:KIAA1107|KIAA1107|human|Q9UPP5	0	1278	RPSKTLSPIYEMD	NaN	0.022	0.024	0.089	0.103	0.107	0.12	0.127	0.125	0.115	0.064	0.105	0.104	0.087	0.113	0.106	0.103	0.095	0.08	0.086	0.083	0.076	0.067	0.025	0.023	0.111	0.121	0.122	0.127	0.113	0.119	0.106	0.054	0.078
1092	Form_1354	BTBD9	btbd9.S	gnl|gene15082|XL-9_2-gene15082|rna44007|	603	36.7	QVPSAVSPRATNP	K.DETSEDSIPSDQSHSAQVPSAVSPR.A	BTB/POZ domain-containing protein 9						0.023	0.025	0.117	0.155	0.187	0.124	0.118	0.09	0.119	0.02	0.022	0.084	0.101	0.089	0.08	0.068	0.107	0.113	0.096	0.09	0.091	0.081	0.022	0.028	0.117	0.139	0.142	0.148	0.149	0.097	0.12	0.02	0.02
327	Form__423	BTF3L4	btf3l4.S	gnl|gene11599|XL-9_2-gene11599|rna33690|	153	5000	GNFDEASKNEANx	K.PEDIEEEDDDVPELVGNFDEASK.N	Transcription factor BTF3 homolog 4						0.026	0.027	0.152	0.127	0.152	0.156	0.109	0.112	0.128	0.007	0.005	0.084	0.077	0.071	0.073	0.084	0.075	0.098	0.099	0.089	0.124	0.127	0.026	0.025	0.129	0.111	0.153	0.14	0.128	0.133	0.137	0.01	0.008
327	Form__424	BTF3L4	btf3l4.S	gnl|gene11599|XL-9_2-gene11599|rna33690|	130	274.9	VLDSKASKPEDIE	K.ASKPEDIEEEDDDVPELVGNFDEASK.N	Transcription factor BTF3 homolog 4						0.02	0.015	0.061	0.075	0.121	0.132	0.146	0.158	0.226	0.021	0.025	0.084	0.077	0.071	0.073	0.084	0.075	0.098	0.099	0.089	0.124	0.127	0.019	0.013	0.049	0.062	0.115	0.112	0.161	0.176	0.227	0.029	0.036
1562	Form_1918	BTRC	btrc.L	gnl|gene17483|XL-9_2-gene17483|rna51055|	122	65.3	PKQRKLSANYEKE	K.LSANYEK.E	F-box/WD repeat-containing protein 1A	GN:BTRC|BTRC|human|Q9Y297	0	127	PKQRKLSASYEKE	NaN	0.066	0.133	0.077	0.141	0.086	0.181	0.07	0.181	0.06	0.001	0.004	0.095	0.083	0.09	0.097	0.092	0.096	0.098	0.094	0.105	0.075	0.076	0.067	0.118	0.074	0.146	0.084	0.185	0.073	0.181	0.067	0.001	0.003
4052	Form_4975	BUB1	bub1.L	gnl|gene4909|XL-9_2-gene4909|rna14338|	694;700	111.3	SKSRKLSPIQEQS;SPIQEQSPEHSKI	R.KLSPIQEQSPEHSK.I	Mitotic checkpoint serine/threonine-protein kinase BUB1						0.004	0.006	0.062	0.145	0.125	0.186	0.124	0.192	0.133	0.016	0.006	0.081	0.075	0.099	0.083	0.107	0.102	0.097	0.093	0.101	0.086	0.077	0.003	0.005	0.064	0.125	0.138	0.197	0.125	0.185	0.139	0.014	0.005
2750	Form_3380	BUB1B	bub1b.L	gnl|gene35951|XL-9_2-gene35951|rna76090|	649	162.2	LCIKKLSPILEAS	K.KLSPILEASQEDTR.T	Mitotic checkpoint serine/threonine-protein kinase BUB1 beta						0.04	0.03	0.104	0.11	0.09	0.077	0.081	0.067	0.076	0.174	0.152	0.093	0.089	0.09	0.094	0.101	0.098	0.088	0.094	0.086	0.083	0.084	0.042	0.03	0.104	0.115	0.101	0.084	0.08	0.07	0.073	0.161	0.142
2750	Form_3381	BUB1B	bub1b.L	gnl|gene35951|XL-9_2-gene35951|rna76090|	649;655	162.2	LCIKKLSPILEAS;SPILEASQEDTRT	K.KLSPILEASQEDTR.T	Mitotic checkpoint serine/threonine-protein kinase BUB1 beta	GN:BUB1B|BUB1B|human|O60566	0	670	LSIKKLSPIIEDS	6	0.027	0.018	0.128	0.162	0.141	0.148	0.115	0.105	0.139	0.006	0.011	0.093	0.089	0.09	0.094	0.101	0.098	0.088	0.094	0.086	0.083	0.084	0.027	0.017	0.124	0.164	0.153	0.156	0.109	0.106	0.129	0.005	0.01
2861	Form_3527	BUD13	bud13.L	gnl|gene37359|XL-9_2-gene37359|rna78062|	120	97.8	SSSALASKDSSPT	K.LIQDTGNESSGMESSSALASK.D	BUD13 homolog						0.048	0.093	0.125	0.074	0.119	0.065	0.07	0.094	0.196	0.021	0.094	0.071	0.051	0.095	0.089	0.108	0.121	0.093	0.089	0.111	0.104	0.069	0.037	0.051	0.128	0.071	0.139	0.085	0.07	0.09	0.234	0.024	0.07
2862	Form_3528	BUD13	bud13.L	gnl|gene37359|XL-9_2-gene37359|rna78062|	349;353	5000	RRRRHVSLDQSPP;HVSLDQSPPRRGR	R.HVSLDQSPPRR.G	BUD13 homolog						0.064	0.06	0.121	0.105	0.105	0.111	0.141	0.129	0.138	0.005	0.022	0.071	0.051	0.095	0.089	0.108	0.121	0.093	0.089	0.111	0.104	0.069	0.048	0.032	0.121	0.098	0.119	0.141	0.138	0.121	0.161	0.006	0.016
2863	Form_3526	BUD13	bud13.L	gnl|gene37359|XL-9_2-gene37359|rna78062|	411;415	5000	RRGRHDSPDLSPP;HDSPDLSPPQRGR	R.HDSPDLSPPQR.G	BUD13 homolog	GN:BUD13|BUD13|human|Q9BRD0	0	271	RRARHDSPDLAPN	NaN	0.088	0.05	0.106	0.114	0.11	0.116	0.12	0.14	0.135	0.004	0.017	0.071	0.051	0.095	0.089	0.108	0.121	0.093	0.089	0.111	0.104	0.069	0.066	0.027	0.106	0.107	0.125	0.148	0.117	0.131	0.157	0.004	0.012
1692	Form_2078	BYSL	bysl.S	gnl|gene18169|XL-9_2-gene18169|rna53094|	95;97	135.6	KNKAEGSDSEDDE;KAEGSDSEDDEWP	K.AEGSDSEDDEWPSLEK.A	Bystin						0.124	0.061	0.129	0.109	0.122	0.114	0.103	0.101	0.124	0.005	0.007	0.093	0.092	0.085	0.089	0.092	0.094	0.099	0.092	0.093	0.084	0.087	0.126	0.061	0.119	0.106	0.122	0.117	0.111	0.101	0.126	0.005	0.007
3911	Form_4805	C12orf4	c12orf4.L	gnl|gene47544|XL-9_2-gene47544|rna92720|	240	19.1	LKNPNNSSISEEI	K.NPNNSSISEEIK.F	Protein C12orf4	GN:C12orf4|C12orf4|human|Q9NQ89	0	240	LKNPNNSSLSEEI	NaN	0.005	0.007	0.104	0.142	0.134	0.161	0.132	0.186	0.119	0.007	0.003	0.094	0.101	0.109	0.094	0.089	0.107	0.08	0.077	0.094	0.067	0.088	0.005	0.008	0.123	0.146	0.13	0.188	0.115	0.156	0.122	0.005	0.003
1746	Form_2151	C18orf25	c18orf25.S	gnl|gene18415|XL-9_2-gene18415|rna53793|	19	5000	LDAEVPSQIDQQK	K.GEELLDAEVPSQIDQQK.V	Uncharacterized protein C18orf25						0.112	0.128	0.14	0.082	0.071	0.079	0.084	0.119	0.085	0.039	0.062	0.088	0.103	0.094	0.107	0.101	0.108	0.082	0.078	0.085	0.071	0.083	0.107	0.143	0.143	0.095	0.078	0.093	0.075	0.101	0.079	0.03	0.056
1747	Form_2152	C18orf25	c18orf25.S	gnl|gene18415|XL-9_2-gene18415|rna53793|	71	33.5	RRDSSESPLASTE	R.DSSESPLASTESDKPTAER.V	Uncharacterized protein C18orf25	GN:C18orf25|C18orf25|human|Q96B23	0	69	RRDSSESQLASTE	NaN	0.075	0.053	0.148	0.128	0.112	0.107	0.112	0.13	0.105	0.013	0.016	0.088	0.103	0.094	0.107	0.101	0.108	0.082	0.078	0.085	0.071	0.083	0.071	0.059	0.149	0.147	0.122	0.124	0.099	0.109	0.096	0.01	0.014
2078	Form_2543	C18orf25	c18orf25.L	gnl|gene19963|XL-9_2-gene19963|rna58276|	28	96	DQQKVDSPAEEGS	K.VDSPAEEGSLELEASLK.D	Uncharacterized protein C18orf25						0.094	0.048	0.047	0.066	0.077	0.072	0.156	0.206	0.212	0.007	0.015	0.091	0.097	0.09	0.108	0.086	0.112	0.087	0.084	0.085	0.091	0.07	0.095	0.052	0.047	0.079	0.074	0.09	0.151	0.192	0.2	0.007	0.012
2079	Form_2540	C18orf25	c18orf25.L	gnl|gene19963|XL-9_2-gene19963|rna58276|	306	26.8	KLTRLDTDEEGKQ	K.LTRLDTDEEGK.Q	Uncharacterized protein C18orf25						0.128	0.071	0.132	0.087	0.114	0.079	0.108	0.1	0.1	0.017	0.063	0.091	0.097	0.09	0.108	0.086	0.112	0.087	0.084	0.085	0.091	0.07	0.128	0.076	0.131	0.103	0.108	0.098	0.104	0.093	0.094	0.017	0.049
2080	Form_2542	C18orf25	c18orf25.L	gnl|gene19963|XL-9_2-gene19963|rna58276|	412	31.7	VKELNNSLTNQDN	K.ELNNSLTNQDNLAPWR.T	Uncharacterized protein C18orf25						0.03	0.044	0.201	0.14	0.137	0.124	0.116	0.114	0.085	0.005	0.004	0.091	0.097	0.09	0.108	0.086	0.112	0.087	0.084	0.085	0.091	0.07	0.029	0.046	0.193	0.162	0.126	0.149	0.108	0.102	0.077	0.005	0.003
2081	Form_2541	C18orf25	c18orf25.L	gnl|gene19963|XL-9_2-gene19963|rna58276|	463;465	5000	DKINISSDSEVEI;INISSDSEVEIVG	K.INISSDSEVEIVGVQEHAR.F	Uncharacterized protein C18orf25						0.053	0.035	0.069	0.085	0.134	0.094	0.133	0.187	0.183	0.009	0.018	0.091	0.097	0.09	0.108	0.086	0.112	0.087	0.084	0.085	0.091	0.07	0.053	0.037	0.069	0.102	0.127	0.116	0.128	0.174	0.172	0.009	0.014
5079	Form_6214	C2CD2L	c2cd2l.L	gnl|gene893|XL-9_2-gene893|rna2622|	450	45.5	FMPRSCSPGSSPS	R.SCSPGSSPSGSGGSPVSLR.L	Phospholipid transfer protein C2CD2L						0.361	0.223	0.034	0.019	0.014	0.013	0.02	0.022	0.021	0.095	0.177	0.084	0.091	0.073	0.086	0.091	0.08	0.1	0.1	0.1	0.099	0.096	0.338	0.226	0.028	0.018	0.014	0.012	0.022	0.025	0.023	0.105	0.189
4098	Form_5028	C2CD5	c2cd5.L	gnl|gene49794|XL-9_2-gene49794|rna95931|	295	15.7	NQTYSFSPSKSFS	K.NQTYSFSPSK.S	C2 domain-containing protein 5 (Fragment)	GN:C2CD5|CDP138|human|Q86YS7	0	295	NQTYSFSPSKSYS	NaN	0.087	0.043	0.158	0.09	0.163	0.1	0.124	0.081	0.149	0.002	0.004	0.109	0.078	0.09	0.088	0.086	0.083	0.095	0.091	0.093	0.086	0.101	0.104	0.037	0.156	0.087	0.154	0.091	0.13	0.081	0.152	0.002	0.005
4099	Form_5025	C2CD5	c2cd5.L	gnl|gene49794|XL-9_2-gene49794|rna95931|	314	46.6	DTDLSLTPKTGMG	R.QSSSSDTDLSLTPK.T	C2 domain-containing protein 5 (Fragment)	GN:C2CD5|CDP138|human|Q86YS7	0	314	DTDLSLTPKTGMG	NaN	0.043	0.053	0.026	0.022	0.019	0.013	0.01	0.014	0.013	0.429	0.357	0.109	0.078	0.09	0.088	0.086	0.083	0.095	0.091	0.093	0.086	0.101	0.051	0.045	0.025	0.021	0.018	0.012	0.01	0.014	0.013	0.4	0.391
4100	Form_5027	C2CD5	c2cd5.L	gnl|gene49794|XL-9_2-gene49794|rna95931|	339	40.8	TLLRQQTQSALEQ	R.QQTQSALEQR.E	C2 domain-containing protein 5 (Fragment)	GN:C2CD5|CDP138|human|Q86YS7	0	339	ALLRQQTQSALEQ	NaN	0.022	0.022	0.053	0.051	0.11	0.128	0.124	0.163	0.175	0.1	0.052	0.109	0.078	0.09	0.088	0.086	0.083	0.095	0.091	0.093	0.086	0.101	0.026	0.019	0.053	0.05	0.105	0.118	0.131	0.164	0.18	0.095	0.058
4101	Form_5026	C2CD5	c2cd5.L	gnl|gene49794|XL-9_2-gene49794|rna95931|	612	21.3	LEETVGSPIPEPR	K.ELYEINPPQEILEETVGSPIPEPR.Q	C2 domain-containing protein 5 (Fragment)	GN:C2CD5|CDP138|human|Q86YS7	0	643	SEEIIGSPIPEPR	NaN	0.031	0.017	0.035	0.041	0.048	0.058	0.206	0.212	0.244	0.056	0.053	0.109	0.078	0.09	0.088	0.086	0.083	0.095	0.091	0.093	0.086	0.101	0.037	0.014	0.034	0.039	0.045	0.052	0.213	0.21	0.247	0.052	0.058
4102	Form_5024	C2CD5	c2cd5.L	gnl|gene49794|XL-9_2-gene49794|rna95931|	628	16.3	RLLRSQSESSDET	R.SQSESSDETAELDLSHGK.K	C2 domain-containing protein 5 (Fragment)	GN:C2CD5|CDP138|human|Q86YS7	0	659	RLLRSQSESSDEV	NaN	0.178	0.147	0.12	0.099	0.099	0.086	0.081	0.07	0.093	0.013	0.014	0.109	0.078	0.09	0.088	0.086	0.083	0.095	0.091	0.093	0.086	0.101	0.213	0.126	0.118	0.095	0.093	0.078	0.084	0.07	0.095	0.012	0.016
4667	Form_5725	C3	c3.L	gnl|gene7154|XL-9_2-gene7154|rna20881|	572	78.9	AIQTPGSPMKLKL	K.DRDNAIQTPGSPMK.L	Complement C3						0.003	0.004	0.116	0.058	0.112	0.114	0.155	0.171	0.249	0.004	0.014	0.104	0.101	0.105	0.095	0.096	0.092	0.088	0.083	0.087	0.07	0.077	0.003	0.004	0.135	0.061	0.119	0.116	0.151	0.157	0.239	0.003	0.012
3918	Form_4815	C5	LOC108698859	gnl|gene47639|XL-9_2-gene47639|rna92857|	291	5000	MVKEDGSPEALII	K.EDGSPEALIIK.Q	Complement C5						0.154	0.078	0.122	0.106	0.122	0.098	0.106	0.094	0.117	0.001	0.004	0.094	0.09	0.096	0.091	0.098	0.095	0.1	0.092	0.094	0.076	0.075	0.153	0.074	0.124	0.102	0.126	0.098	0.112	0.091	0.116	0.001	0.003
336	Form__433	C8orf33	c8orf33.L	gnl|gene11627|XL-9_2-gene11627|rna33774|	156	5000	QLEIPRTGDNKDC	K.EQLEIPRTGDNK.D	UPF0488 protein C8orf33						0.019	0.024	0.093	0.103	0.105	0.121	0.126	0.16	0.118	0.057	0.074	0.096	0.086	0.129	0.127	0.112	0.101	0.08	0.067	0.076	0.064	0.063	0.02	0.023	0.132	0.144	0.129	0.134	0.111	0.118	0.099	0.04	0.051
1152	Form_1429	C9	c9.L	gnl|gene15477|XL-9_2-gene15477|rna45182|	418	30.8	KTGGGESETEPSI	K.TGGGESETEPSINIK.P	Complement component C9						0.106	0.091	0.117	0.126	0.112	0.128	0.094	0.12	0.099	0.002	0.004	0.099	0.096	0.094	0.091	0.099	0.093	0.094	0.094	0.086	0.08	0.076	0.112	0.093	0.117	0.122	0.118	0.127	0.094	0.12	0.091	0.002	0.003
4355	Form_5349	CAAP1	caap1.L	gnl|gene5469|XL-9_2-gene5469|rna16030|	17	39.6	KKKRRRSCEGGTQ	R.SCEGGTQVERK.R	Caspase activity and apoptosis inhibitor 1						0.078	0.054	0.135	0.112	0.122	0.117	0.108	0.099	0.161	0.003	0.01	0.081	0.09	0.077	0.094	0.095	0.111	0.087	0.124	0.078	0.081	0.081	0.069	0.053	0.113	0.114	0.126	0.141	0.102	0.133	0.136	0.003	0.009
4356	Form_5350	CAAP1	caap1.L	gnl|gene5469|XL-9_2-gene5469|rna16030|	141;143	62.7	GEQGNDSATEEET;QGNDSATEEETEG	R.ILDGEQGNDSATEEETEGHVR.R	Caspase activity and apoptosis inhibitor 1						0.145	0.079	0.136	0.122	0.107	0.099	0.108	0.083	0.097	0.012	0.01	0.081	0.09	0.077	0.094	0.095	0.111	0.087	0.124	0.078	0.081	0.081	0.129	0.078	0.115	0.126	0.112	0.121	0.103	0.113	0.083	0.011	0.009
4356	Form_5351	CAAP1	caap1.L	gnl|gene5469|XL-9_2-gene5469|rna16030|	141	50.5	GEQGNDSATEEET	R.ILDGEQGNDSATEEETEGHVR.R	Caspase activity and apoptosis inhibitor 1						0.083	0.029	0.175	0.13	0.126	0.094	0.14	0.071	0.11	0.015	0.028	0.081	0.09	0.077	0.094	0.095	0.111	0.087	0.124	0.078	0.081	0.081	0.074	0.029	0.149	0.135	0.132	0.116	0.135	0.097	0.095	0.013	0.025
3271	Form_4027	CABIN1	LOC108716033	gnl|gene41810|XL-9_2-gene41810|rna84389|	55	22.3	LDHFDESSQAYHQ	K.LDHFDESSQAYHQLLETR.L	Calcineurin-binding protein cabin-1						0.12	0.052	0.104	0.123	0.128	0.113	0.108	0.104	0.131	0.006	0.011	0.087	0.092	0.09	0.087	0.098	0.101	0.092	0.096	0.089	0.089	0.079	0.113	0.052	0.101	0.116	0.136	0.124	0.108	0.108	0.126	0.006	0.009
3272	Form_4024	CABIN1	LOC108716033	gnl|gene41810|XL-9_2-gene41810|rna84389|	382;388	5000	VKRKKISEDAGET;SEDAGETAKRRSA	K.ISEDAGETAK.R	Calcineurin-binding protein cabin-1	GN:CABIN1|CABIN1|human|Q9Y6J0	0	389	SEESGETAKRRSA	NaN	0.001	0.004	0.195	0.077	0.116	0.148	0.136	0.161	0.15	0.003	0.007	0.087	0.092	0.09	0.087	0.098	0.101	0.092	0.096	0.089	0.089	0.079	0.001	0.004	0.188	0.072	0.122	0.16	0.134	0.165	0.143	0.003	0.006
3272	Form_4025	CABIN1	LOC108716033	gnl|gene41810|XL-9_2-gene41810|rna84389|	382	5000	VKRKKISEDAGET	K.KISEDAGETAK.R	Calcineurin-binding protein cabin-1	GN:CABIN1|CABIN1|human|Q9Y6J0	0	383	VKRKKISEESGET	NaN	0.011	0.017	0.138	0.142	0.145	0.118	0.133	0.121	0.151	0.006	0.018	0.087	0.092	0.09	0.087	0.098	0.101	0.092	0.096	0.089	0.089	0.079	0.01	0.017	0.134	0.133	0.153	0.128	0.132	0.125	0.145	0.006	0.015
3273	Form_4023	CABIN1	LOC108716033	gnl|gene41810|XL-9_2-gene41810|rna84389|	2077;2082	52.8	ITVTPPTPTLLSP;PTPTLLSPKGSIS	K.FPPEITVTPPTPTLLSPK.G	Calcineurin-binding protein cabin-1	GN:CABIN1|CABIN1|human|Q9Y6J0	0	2154	ITVTPPTPTLLSP	NaN	0.026	0.052	0.124	0.103	0.111	0.118	0.148	0.133	0.139	0.02	0.026	0.087	0.092	0.09	0.087	0.098	0.101	0.092	0.096	0.089	0.089	0.079	0.024	0.052	0.12	0.097	0.117	0.129	0.147	0.138	0.133	0.019	0.022
3273	Form_4026	CABIN1	LOC108716033	gnl|gene41810|XL-9_2-gene41810|rna84389|	2082	52.8	PTPTLLSPKGSIS	K.FPPEITVTPPTPTLLSPK.G	Calcineurin-binding protein cabin-1	GN:CABIN1|CABIN1|human|Q9Y6J0	0	2159	PTPTLLSPKGSIS	NaN	0.032	0.05	0.119	0.104	0.108	0.126	0.127	0.141	0.155	0.013	0.025	0.087	0.092	0.09	0.087	0.098	0.101	0.092	0.096	0.089	0.089	0.079	0.03	0.05	0.116	0.098	0.115	0.138	0.126	0.146	0.149	0.013	0.021
4353	Form_5347	CACTIN	cactin.S	gnl|gene5452|XL-9_2-gene5452|rna15981|	534	17.4	PIIKPESPSNREN	K.QEQGVESEPLFPIIKPESPSNR.E	Cactin						0.082	0.077	0.089	0.123	0.095	0.124	0.113	0.135	0.128	0.017	0.017	0.085	0.068	0.088	0.087	0.103	0.099	0.097	0.09	0.101	0.104	0.079	0.076	0.057	0.085	0.116	0.106	0.134	0.119	0.132	0.141	0.019	0.015
4375	Form_5373	CAD	cad.L	gnl|gene5637|XL-9_2-gene5637|rna16505|	1848;1851	102.8	ERHRHVTVQSETI;RHVTVQSETIRSR	R.HVTVQSETIR.S	Aspartate carbamoyltransferase (Fragment)						0.012	0.006	0.044	0.064	0.119	0.146	0.142	0.2	0.255	0.002	0.01	0.088	0.089	0.085	0.089	0.088	0.091	0.09	0.093	0.09	0.099	0.097	0.012	0.006	0.041	0.063	0.116	0.147	0.141	0.206	0.254	0.002	0.011
4375	Form_5374	CAD	cad.L	gnl|gene5637|XL-9_2-gene5637|rna16505|	1848	102.8	ERHRHVTVQSETI	R.HVTVQSETIR.S	Aspartate carbamoyltransferase (Fragment)						0.042	0.029	0.071	0.087	0.112	0.138	0.131	0.16	0.167	0.032	0.03	0.088	0.089	0.085	0.089	0.088	0.091	0.09	0.093	0.09	0.099	0.097	0.041	0.029	0.067	0.086	0.109	0.139	0.131	0.165	0.166	0.035	0.032
4376	Form_5372	CAD	cad.L	gnl|gene5637|XL-9_2-gene5637|rna16505|	1882	5000	PRVHRASDPGLPA	R.VHRASDPGLPAEEQK.E	Aspartate carbamoyltransferase (Fragment)	GN:CAD|CAD|human|P27708	0	1859	PRIHRASDPGLPA	5	0.22	0.063	0.184	0.135	0.094	0.105	0.071	0.052	0.06	0.004	0.011	0.088	0.089	0.085	0.089	0.088	0.091	0.09	0.093	0.09	0.099	0.097	0.219	0.063	0.177	0.136	0.093	0.108	0.072	0.055	0.061	0.005	0.012
3822	Form_4698	CADPS2	LOC108711145	gnl|gene46541|XL-9_2-gene46541|rna91359|	49	13.9	TLPRPASPSPSVR	R.STLPRPASPSPSVRSEGR.E	Calcium-dependent secretion activator 2						0.076	0.053	0.152	0.137	0.137	0.127	0.101	0.094	0.106	0.006	0.012	0.083	0.081	0.082	0.081	0.09	0.091	0.096	0.102	0.098	0.097	0.097	0.071	0.048	0.139	0.124	0.138	0.129	0.109	0.107	0.116	0.006	0.013
3822	Form_4699	CADPS2	LOC108711145	gnl|gene46541|XL-9_2-gene46541|rna91359|	56	21.6	PSPSVRSEGREEQ	R.STLPRPASPSPSVRSEGR.E	Calcium-dependent secretion activator 2						0.079	0.057	0.142	0.148	0.123	0.136	0.103	0.104	0.098	0.004	0.006	0.083	0.081	0.082	0.081	0.09	0.091	0.096	0.102	0.098	0.097	0.097	0.073	0.052	0.13	0.134	0.124	0.138	0.111	0.119	0.107	0.004	0.007
3823	Form_4697	CADPS2	LOC108711145	gnl|gene46541|XL-9_2-gene46541|rna91359|	1282	67.7	GVTMKDSDGEDDx	R.GGLQGVTMKDSDGEDD.-	Calcium-dependent secretion activator 2						0.107	0.076	0.133	0.131	0.127	0.124	0.089	0.105	0.097	0.004	0.007	0.083	0.081	0.082	0.081	0.09	0.091	0.096	0.102	0.098	0.097	0.097	0.1	0.069	0.122	0.119	0.128	0.127	0.096	0.12	0.107	0.004	0.008
1569	Form_1928	CALCOCO2	calcoco2.S	gnl|gene17529|XL-9_2-gene17529|rna51184|	227	5000	LQNQSRSVQVEHN	R.SVQVEHNQFK.E	Calcium-binding and coiled-coil domain-containing protein 2						0.102	0.07	0.159	0.105	0.115	0.1	0.076	0.074	0.14	0.013	0.047	0.092	0.083	0.09	0.091	0.102	0.094	0.093	0.088	0.092	0.085	0.089	0.102	0.063	0.156	0.104	0.128	0.102	0.077	0.071	0.14	0.012	0.046
4021	Form_4940	CALD1	LOC100653508	gnl|gene48721|XL-9_2-gene48721|rna94409|	478	229.4	SPSGALSPNKETA	K.GNVFSSPSGALSPNK.E	Caldesmon						0.019	0.027	0.057	0.07	0.16	0.152	0.182	0.126	0.144	0.042	0.022	0.237	0.086	0.193	0.119	0.052	0.048	0.036	0.048	0.038	0.03	0.113	0.071	0.036	0.172	0.131	0.131	0.115	0.103	0.095	0.086	0.02	0.04
1385	Form_1704	CAMK2B	camk2g.L	gnl|gene16544|XL-9_2-gene16544|rna48314|	287	5000	MMHRQETVECLRK	R.QETVECLR.K	Calcium/calmodulin-dependent protein kinase type II subunit beta	GN:CAMK2G|CAMK2G|human|Q13555	0	287	MMHRQETVECLRK	4	0.089	0.083	0.101	0.125	0.102	0.146	0.107	0.136	0.087	0.011	0.015	0.096	0.087	0.095	0.088	0.099	0.094	0.089	0.087	0.088	0.091	0.086	0.093	0.079	0.105	0.12	0.11	0.15	0.104	0.129	0.084	0.011	0.014
1386	Form_1709	CAMK2B	camk2g.L	gnl|gene16544|XL-9_2-gene16544|rna48314|	394;397	5000	QTNNKNSIISPAK;NKNSIISPAKENP	K.NSIISPAK.E	Calcium/calmodulin-dependent protein kinase type II subunit beta	GN:CAMK2G|CAMK2G|human|Q13555	0	349	QSNNKNSLVSPAQ	NaN	0.001	0.001	0.042	0.043	0.107	0.101	0.191	0.221	0.282	0.002	0.01	0.096	0.087	0.095	0.088	0.099	0.094	0.089	0.087	0.088	0.091	0.086	0.001	0.001	0.044	0.042	0.117	0.105	0.189	0.213	0.275	0.002	0.01
1387	Form_1706	CAMK2B	camk2g.L	gnl|gene16544|XL-9_2-gene16544|rna48314|	408	41.9	NPPLQASMEPQTT	K.ENPPLQASMEPQTTVVHNATDGIK.G	Calcium/calmodulin-dependent protein kinase type II subunit beta						0.02	0.018	0.038	0.035	0.092	0.09	0.169	0.203	0.307	0.012	0.018	0.096	0.087	0.095	0.088	0.099	0.094	0.089	0.087	0.088	0.091	0.086	0.021	0.017	0.04	0.034	0.101	0.094	0.167	0.196	0.3	0.012	0.017
1387	Form_1710	CAMK2B	camk2g.L	gnl|gene16544|XL-9_2-gene16544|rna48314|	414	16.5	SMEPQTTVVHNAT	K.ENPPLQASMEPQTTVVHNATDGIK.G	Calcium/calmodulin-dependent protein kinase type II subunit beta	GN:CAMK2G|CAMK2G|human|Q13555	0	369	AMEPQTTVVHNAT	NaN	0.015	0.024	0.059	0.068	0.12	0.101	0.128	0.117	0.154	0.131	0.083	0.096	0.087	0.095	0.088	0.099	0.094	0.089	0.087	0.088	0.091	0.086	0.016	0.023	0.062	0.066	0.131	0.105	0.126	0.112	0.149	0.131	0.079
1388	Form_1705	CAMK2B	camk2g.L	gnl|gene16544|XL-9_2-gene16544|rna48314|	429	55.8	IKGSTESCNTTTE	K.GSTESCNTTTEDEDLK.A	Calcium/calmodulin-dependent protein kinase type II subunit beta						0.044	0.029	0.082	0.077	0.116	0.118	0.173	0.168	0.178	0.004	0.012	0.096	0.087	0.095	0.088	0.099	0.094	0.089	0.087	0.088	0.091	0.086	0.046	0.028	0.086	0.075	0.126	0.122	0.169	0.161	0.172	0.004	0.011
1388	Form_1708	CAMK2B	camk2g.L	gnl|gene16544|XL-9_2-gene16544|rna48314|	426	16.4	TDGIKGSTESCNT	K.GSTESCNTTTEDEDLK.A	Calcium/calmodulin-dependent protein kinase type II subunit beta						0.093	0.048	0.092	0.085	0.103	0.093	0.148	0.162	0.169	0.002	0.004	0.096	0.087	0.095	0.088	0.099	0.094	0.089	0.087	0.088	0.091	0.086	0.098	0.046	0.096	0.082	0.112	0.096	0.144	0.155	0.163	0.002	0.004
1389	Form_1707	CAMK2B	camk2g.L	gnl|gene16544|XL-9_2-gene16544|rna48314|	457	33.5	LLLQGWSQSESKI	K.ANPVCPGDGPLLLQGWSQSESK.I	Calcium/calmodulin-dependent protein kinase type II subunit beta						0.014	0.009	0.047	0.039	0.099	0.106	0.192	0.201	0.273	0.007	0.012	0.096	0.087	0.095	0.088	0.099	0.094	0.089	0.087	0.088	0.091	0.086	0.015	0.009	0.05	0.038	0.109	0.111	0.19	0.194	0.266	0.007	0.011
2663	Form_3275	CAMK2B	camk2g.S	gnl|gene35258|XL-9_2-gene35258|rna75143|	37	25.3	CVKKSSSQEYAAK	K.SSSQEYAAK.I	Calcium/calmodulin-dependent protein kinase type II subunit beta						0.022	0.06	0.057	0.145	0.099	0.188	0.115	0.221	0.089	0.002	0.002	0.164	0.143	0.095	0.069	0.064	0.069	0.062	0.062	0.06	0.1	0.112	0.05	0.116	0.074	0.136	0.086	0.176	0.097	0.186	0.073	0.003	0.003
3938	Form_4841	CAMKK1	LOC108708359	gnl|gene47761|XL-9_2-gene47761|rna93010|	43	5000	APERINSDEMDGL	R.INSDEMDGLK.N	Calcium/calmodulin-dependent protein kinase kinase 1						0.015	0.015	0.136	0.146	0.139	0.158	0.152	0.135	0.095	0.001	0.005	0.083	0.103	0.085	0.089	0.098	0.088	0.085	0.091	0.107	0.084	0.086	0.014	0.017	0.127	0.143	0.15	0.153	0.142	0.135	0.112	0.001	0.005
3939	Form_4842	CAMKK1	LOC108708359	gnl|gene47761|XL-9_2-gene47761|rna93010|	56	19.6	KNNCMSSETSEDV	K.NNCMSSETSEDVFLSSQEQR.D	Calcium/calmodulin-dependent protein kinase kinase 1						0.066	0.039	0.085	0.093	0.128	0.123	0.158	0.142	0.139	0.008	0.019	0.083	0.103	0.085	0.089	0.098	0.088	0.085	0.091	0.107	0.084	0.086	0.06	0.044	0.079	0.09	0.137	0.118	0.146	0.141	0.162	0.007	0.018
1094	Form_1356	CAMLG	camlg.L	gnl|gene15087|XL-9_2-gene15087|rna44023|	124	33.2	NRTDVPSESTPRG	R.TDVPSESTPR.G	Calcium signal-modulating cyclophilin ligand						0.004	0.01	0.145	0.161	0.153	0.16	0.118	0.104	0.127	0.009	0.009	0.096	0.092	0.098	0.087	0.098	0.093	0.099	0.096	0.088	0.076	0.075	0.004	0.01	0.152	0.15	0.16	0.159	0.125	0.107	0.119	0.007	0.007
2625	Form_3231	CAMSAP1	LOC108698179	gnl|gene34894|XL-9_2-gene34894|rna74601|	625	16.3	QNDGNQSFSRKKL	K.RQNDGNQSFSR.K	Calmodulin-regulated spectrin-associated protein 1						0.01	0.013	0.144	0.152	0.135	0.152	0.114	0.131	0.139	0.002	0.007	0.089	0.091	0.101	0.091	0.097	0.102	0.094	0.089	0.087	0.079	0.081	0.009	0.013	0.154	0.147	0.139	0.164	0.114	0.124	0.128	0.002	0.006
2626	Form_3232	CAMSAP1	LOC108698179	gnl|gene34894|XL-9_2-gene34894|rna74601|	936	93.2	KEYTKRTPEDIDT	K.RTPEDIDTVSVNAK.V	Calmodulin-regulated spectrin-associated protein 1						0.039	0.025	0.048	0.078	0.075	0.097	0.09	0.15	0.177	0.117	0.104	0.089	0.091	0.101	0.091	0.097	0.102	0.094	0.089	0.087	0.079	0.081	0.039	0.025	0.054	0.079	0.081	0.11	0.094	0.149	0.172	0.103	0.094
2626	Form_3235	CAMSAP1	LOC108698179	gnl|gene34894|XL-9_2-gene34894|rna74601|	944	35.6	EDIDTVSVNAKVE	K.RTPEDIDTVSVNAK.V	Calmodulin-regulated spectrin-associated protein 1						0.056	0.026	0.093	0.14	0.119	0.138	0.114	0.136	0.105	0.034	0.04	0.089	0.091	0.101	0.091	0.097	0.102	0.094	0.089	0.087	0.079	0.081	0.054	0.025	0.101	0.137	0.124	0.151	0.115	0.13	0.098	0.029	0.035
2627	Form_3236	CAMSAP1	LOC108698179	gnl|gene34894|XL-9_2-gene34894|rna74601|	1017	21.6	IEKLNETISTLQQ	K.LNETISTLQQAIMK.I	Calmodulin-regulated spectrin-associated protein 1	GN:CAMSAP1|CAMSAP1|human|Q5T5Y3	0	1030	IEKLNETISTLQQ	NaN	0.006	0.006	0.082	0.128	0.141	0.159	0.111	0.131	0.123	0.054	0.058	0.089	0.091	0.101	0.091	0.097	0.102	0.094	0.089	0.087	0.079	0.081	0.006	0.006	0.089	0.126	0.147	0.175	0.113	0.126	0.115	0.046	0.051
2628	Form_3234	CAMSAP1	LOC108698179	gnl|gene34894|XL-9_2-gene34894|rna74601|	1202	58.9	VSTSEGSGKENVP	R.LAGVSTSEGSGK.E	Calmodulin-regulated spectrin-associated protein 1						0.015	0.009	0.046	0.086	0.134	0.138	0.144	0.178	0.229	0.008	0.014	0.089	0.091	0.101	0.091	0.097	0.102	0.094	0.089	0.087	0.079	0.081	0.014	0.009	0.05	0.084	0.14	0.152	0.146	0.171	0.215	0.007	0.012
2629	Form_3233	CAMSAP1	LOC108698179	gnl|gene34894|XL-9_2-gene34894|rna74601|	1225	107.3	LIEVDLSDLKEPE	K.SSLIEVDLSDLK.E	Calmodulin-regulated spectrin-associated protein 1	GN:CAMSAP1|CAMSAP1|human|Q5T5Y3	0	1239	LIEVDLSDLKAPD	NaN	0.001	0.006	0.074	0.066	0.098	0.075	0.186	0.228	0.253	0.005	0.009	0.089	0.091	0.101	0.091	0.097	0.102	0.094	0.089	0.087	0.079	0.081	0.001	0.006	0.081	0.065	0.103	0.083	0.19	0.22	0.239	0.004	0.008
2432	Form_2993	CANX	canx.S	gnl|gene3002|XL-9_2-gene3002|rna8697|	602	5000	DEIINRSPRNRKL	K.EDEIINRSPR.N	Calnexin	GN:CANX|Calnexin|human|P27824	0	583	DEILNRSPRNRKP	2	0.096	0.075	0.125	0.137	0.131	0.131	0.089	0.095	0.092	0.011	0.017	0.081	0.081	0.086	0.076	0.083	0.084	0.107	0.1	0.105	0.099	0.099	0.088	0.069	0.122	0.118	0.123	0.125	0.108	0.108	0.109	0.012	0.019
3420	Form_4211	CANX	canx.S	gnl|gene42840|XL-9_2-gene42840|rna85902|	565	27	EEDAEESDTQKPK	K.AEEEEDAEESDTQKPK.Q	Calnexin						0.074	0.064	0.1	0.097	0.098	0.125	0.128	0.14	0.156	0.008	0.011	0.102	0.097	0.106	0.106	0.1	0.095	0.085	0.081	0.079	0.073	0.076	0.082	0.067	0.115	0.112	0.106	0.129	0.118	0.123	0.134	0.006	0.009
3421	Form_4210	CANX	canx.S	gnl|gene42840|XL-9_2-gene42840|rna85902|	583	5000	GDEGQESQEEEEA	K.QDEDEGDEGQESQEEEEAEEEIKPK.E	Calnexin						0.094	0.068	0.1	0.102	0.114	0.125	0.11	0.13	0.145	0.005	0.007	0.102	0.097	0.106	0.106	0.1	0.095	0.085	0.081	0.079	0.073	0.076	0.103	0.071	0.114	0.116	0.122	0.128	0.1	0.113	0.123	0.004	0.006
3422	Form_4212	CANX	canx.S	gnl|gene42840|XL-9_2-gene42840|rna85902|	604	5000	DDIMNRSPRNRKP	K.EDDIMNRSPR.N	Calnexin	GN:CANX|Calnexin|human|P27824	0	583	DEILNRSPRNRKP	2	0.094	0.023	0.043	0.063	0.046	0.091	0.188	0.254	0.176	0.007	0.015	0.102	0.097	0.106	0.106	0.1	0.095	0.085	0.081	0.079	0.073	0.076	0.109	0.025	0.051	0.075	0.052	0.098	0.181	0.233	0.157	0.006	0.013
4860	Form_5952	CANX	clgn.L	gnl|gene8010|XL-9_2-gene8010|rna23350|	514;520	109.4	SDLCDESNLELQS;SNLELQSNAKEVS	K.LSDLCDESNLELQSNAK.E	Calnexin						0.003	0.003	0.076	0.086	0.111	0.144	0.161	0.207	0.194	0.005	0.01	0.085	0.089	0.084	0.087	0.092	0.098	0.092	0.09	0.092	0.101	0.091	0.003	0.003	0.07	0.082	0.112	0.154	0.162	0.204	0.195	0.005	0.01
5191	Form_6357	CAPRIN1	caprin1.S	gnl|gene9547|XL-9_2-gene9547|rna27779|	281;283	27.6	MTEAQYSGSEKEQ;EAQYSGSEKEQVD	R.QFMTEAQYSGSEK.E	Caprin-1						0.064	0.05	0.076	0.091	0.122	0.137	0.106	0.124	0.218	0.003	0.01	0.089	0.088	0.096	0.097	0.092	0.103	0.092	0.102	0.085	0.082	0.074	0.061	0.047	0.078	0.095	0.12	0.151	0.104	0.135	0.198	0.003	0.008
2140	Form_2619	CAPRIN2	caprin2.L	gnl|gene20383|XL-9_2-gene20383|rna59541|	627	169.9	LSDQLPSPKTPTH	R.TTTPLPLLSDQLPSPK.T	Caprin-2						0.049	0.071	0.109	0.11	0.124	0.145	0.111	0.124	0.095	0.031	0.033	0.275	0.261	0.055	0.041	0.039	0.034	0.038	0.034	0.04	0.032	0.151	0.192	0.262	0.085	0.064	0.069	0.07	0.06	0.06	0.054	0.014	0.07
2140	Form_2620	CAPRIN2	caprin2.L	gnl|gene20383|XL-9_2-gene20383|rna59541|	616;627	169.9	LPERTTTPLPLLS;LSDQLPSPKTPTH	R.TTTPLPLLSDQLPSPK.T	Caprin-2						0.043	0.073	0.102	0.112	0.13	0.145	0.11	0.131	0.094	0.028	0.033	0.275	0.261	0.055	0.041	0.039	0.034	0.038	0.034	0.04	0.032	0.151	0.172	0.275	0.081	0.066	0.073	0.071	0.06	0.064	0.054	0.013	0.071
2141	Form_2621	CAPRIN2	caprin2.L	gnl|gene20383|XL-9_2-gene20383|rna59541|	846	132.7	ESSQMNSPEKEDS	R.GFSESSQMNSPEK.E	Caprin-2						0.408	0.191	0.116	0.058	0.037	0.032	0.053	0.021	0.055	0.006	0.024	0.275	0.261	0.055	0.041	0.039	0.034	0.038	0.034	0.04	0.032	0.151	0.616	0.274	0.035	0.013	0.008	0.006	0.011	0.004	0.012	0.001	0.02
2141	Form_2622	CAPRIN2	caprin2.L	gnl|gene20383|XL-9_2-gene20383|rna59541|	839;846	132.7	TSSRGFSESSQMN;ESSQMNSPEKEDS	R.GFSESSQMNSPEK.E	Caprin-2						0.058	0.112	0.397	0.113	0.08	0.076	0.055	0.062	0.036	0.008	0.004	0.275	0.261	0.055	0.041	0.039	0.034	0.038	0.034	0.04	0.032	0.151	0.19	0.349	0.26	0.055	0.037	0.031	0.025	0.025	0.017	0.003	0.008
928	Form_1137	CAPZA2	capza2.S	gnl|gene14350|XL-9_2-gene14350|rna41799|	229;231;236	32.9	DIEESLTVSNEVQ;EESLTVSNEVQTA;VSNEVQTAKEFIK	K.DIEESLTVSNEVQTAK.E	F-actin-capping protein subunit alpha-2	GN:CAPZA2|CAPZA2|human|P47755	0;0;0	217;219;224	DIQDSLTVSNEVQ;QDSLTVSNEVQTA;VSNEVQTAKEFIK	NaN;NaN;NaN	0.127	0.081	0.148	0.152	0.116	0.131	0.088	0.088	0.061	0.004	0.005	0.073	0.063	0.074	0.066	0.08	0.067	0.095	0.088	0.096	0.139	0.158	0.121	0.067	0.143	0.131	0.121	0.115	0.109	0.101	0.076	0.007	0.01
2546	Form_3139	CARHSP1	carhsp1.S	gnl|gene3414|XL-9_2-gene3414|rna9939|	47	23.7	RGYLIPSPLPTRR	R.GYLIPSPLPTRR.T	Calcium-regulated heat-stable protein 1						0.094	0.117	0.124	0.116	0.06	0.069	0.07	0.071	0.062	0.021	0.196	0.093	0.099	0.1	0.1	0.097	0.105	0.077	0.085	0.08	0.084	0.08	0.096	0.127	0.136	0.127	0.064	0.079	0.059	0.066	0.054	0.019	0.172
1390	Form_1712	CARMIL1	lrrc16a.S	gnl|gene16555|XL-9_2-gene16555|rna48366|	959	27.6	SFKSSESQDAGEW	K.SSESQDAGEWEEK.K	F-actin-uncapping protein LRRC16A						0.04	0.011	0.034	0.105	0.167	0.066	0.143	0.178	0.251	0.003	0.003	0.07	0.164	0.14	0.048	0.043	0.14	0.065	0.066	0.054	0.051	0.16	0.042	0.027	0.072	0.076	0.109	0.141	0.141	0.178	0.205	0.002	0.007
1391	Form_1711	CARMIL1	lrrc16a.S	gnl|gene16555|XL-9_2-gene16555|rna48366|	1009	93.4	PKASLKSPAPDTA	K.SPAPDTAK.K	F-actin-uncapping protein LRRC16A						0.004	0.016	0.084	0.112	0.207	0.082	0.134	0.16	0.193	0.003	0.004	0.07	0.164	0.14	0.048	0.043	0.14	0.065	0.066	0.054	0.051	0.16	0.004	0.037	0.166	0.076	0.125	0.161	0.123	0.149	0.147	0.002	0.009
2451	Form_3022	CARMIL1	lrrc16a.L	gnl|gene3059|XL-9_2-gene3059|rna8858|	879	63.7	PLPHQDSMEIETV	K.PLPHQDSMEIETVEERPAK.R	F-actin-uncapping protein LRRC16A						0.075	0.08	0.103	0.122	0.146	0.133	0.111	0.117	0.103	0.005	0.006	0.108	0.082	0.092	0.081	0.074	0.082	0.086	0.084	0.095	0.113	0.104	0.095	0.076	0.11	0.115	0.126	0.127	0.111	0.115	0.114	0.006	0.007
2452	Form_3024	CARMIL1	lrrc16a.L	gnl|gene3059|XL-9_2-gene3059|rna8858|	1047	51.4	SFKSSESQDAGEW	K.SSESQDAGEWEVK.K	F-actin-uncapping protein LRRC16A						0.053	0.037	0.096	0.084	0.125	0.112	0.142	0.164	0.178	0.001	0.008	0.108	0.082	0.092	0.081	0.074	0.082	0.086	0.084	0.095	0.113	0.104	0.066	0.035	0.102	0.078	0.107	0.106	0.141	0.159	0.195	0.001	0.009
2453	Form_3023	CARMIL1	lrrc16a.L	gnl|gene3059|XL-9_2-gene3059|rna8858|	1133	54	RSEEVKTPDSLEE	R.SEEVKTPDSLEENLDDLTK.T	F-actin-uncapping protein LRRC16A						0.012	0.013	0.038	0.049	0.115	0.103	0.149	0.149	0.195	0.079	0.098	0.108	0.082	0.092	0.081	0.074	0.082	0.086	0.084	0.095	0.113	0.104	0.014	0.012	0.039	0.044	0.095	0.094	0.143	0.14	0.207	0.099	0.114
2453	Form_3027	CARMIL1	lrrc16a.L	gnl|gene3059|XL-9_2-gene3059|rna8858|	1133;1136	54	RSEEVKTPDSLEE;EVKTPDSLEENLD	R.SEEVKTPDSLEENLDDLTK.T	F-actin-uncapping protein LRRC16A	GN:CARMIL1|LRRC16|human|Q5VZK9	0	1128	RIEEIKTPDSFEE	NaN	0.044	0.053	0.063	0.067	0.095	0.124	0.111	0.196	0.229	0.002	0.014	0.108	0.082	0.092	0.081	0.074	0.082	0.086	0.084	0.095	0.113	0.104	0.055	0.05	0.067	0.062	0.081	0.117	0.11	0.189	0.25	0.002	0.017
2454	Form_3025	CARMIL1	lrrc16a.L	gnl|gene3059|XL-9_2-gene3059|rna8858|	1348	100.6	PSSSEVSPKRGQS	K.PLLDEAARPPSSSEVSPK.R	F-actin-uncapping protein LRRC16A						0.002	0.004	0.106	0.117	0.168	0.164	0.149	0.142	0.14	0.001	0.007	0.108	0.082	0.092	0.081	0.074	0.082	0.086	0.084	0.095	0.113	0.104	0.003	0.004	0.115	0.112	0.147	0.159	0.152	0.141	0.157	0.002	0.008
2455	Form_3021	CARMIL1	lrrc16a.L	gnl|gene3059|XL-9_2-gene3059|rna8858|	1378;1381	5000	GQQRSKSCDSGEE;RSKSCDSGEEVDK	K.SCDSGEEVDK.E	F-actin-uncapping protein LRRC16A						0.011	0.018	0.094	0.107	0.135	0.153	0.136	0.159	0.178	0.003	0.006	0.108	0.082	0.092	0.081	0.074	0.082	0.086	0.084	0.095	0.113	0.104	0.014	0.017	0.101	0.101	0.117	0.147	0.137	0.156	0.198	0.004	0.007
2455	Form_3026	CARMIL1	lrrc16a.L	gnl|gene3059|XL-9_2-gene3059|rna8858|	1378	5000	GQQRSKSCDSGEE	K.SCDSGEEVDK.E	F-actin-uncapping protein LRRC16A						0.03	0.017	0.16	0.12	0.172	0.118	0.139	0.108	0.129	0.002	0.004	0.108	0.082	0.092	0.081	0.074	0.082	0.086	0.084	0.095	0.113	0.104	0.038	0.016	0.172	0.114	0.149	0.113	0.14	0.106	0.143	0.003	0.005
4776	Form_5857	CARNMT1	carnmt1.S	gnl|gene7790|XL-9_2-gene7790|rna22742|	17	5000	ERRQRKSPEEEEA	K.SPEEEEALEK.E	Carnosine N-methyltransferase						0.102	0.057	0.135	0.084	0.095	0.119	0.096	0.112	0.166	0.01	0.025	0.074	0.076	0.075	0.111	0.102	0.111	0.102	0.105	0.081	0.089	0.074	0.082	0.047	0.11	0.101	0.105	0.144	0.106	0.128	0.146	0.01	0.02
3756	Form_4617	CARS1	cars.S	gnl|gene45948|XL-9_2-gene45948|rna90532|	761	16.3	LEKMKISPSQMFT	K.ISPSQMFTLETDK.Y	Cysteine--tRNA ligase, cytoplasmic						0.043	0.025	0.069	0.064	0.087	0.083	0.097	0.092	0.218	0.093	0.128	0.097	0.102	0.096	0.089	0.091	0.089	0.089	0.089	0.086	0.087	0.086	0.047	0.029	0.074	0.064	0.089	0.083	0.097	0.092	0.21	0.091	0.123
1225	Form_1519	CASP10	casp10.S	gnl|gene15804|XL-9_2-gene15804|rna46178|	519	136.6	TTCQENSPxxxxx	R.STTCQENSP.-	Caspase-10						0.049	0.032	0.133	0.134	0.127	0.111	0.146	0.125	0.124	0.003	0.016	0.091	0.08	0.099	0.08	0.105	0.104	0.081	0.089	0.098	0.088	0.085	0.048	0.028	0.143	0.116	0.144	0.125	0.128	0.12	0.131	0.003	0.015
4684	Form_5746	CASP7	casp7.L	gnl|gene7273|XL-9_2-gene7273|rna21224|	216	63.5	SGSVNDSLETDAN	R.GHEFDDGLEADSGSVNDSLETDANPR.H	Caspase-7						0.062	0.048	0.072	0.074	0.08	0.086	0.08	0.08	0.109	0.109	0.199	0.093	0.082	0.095	0.093	0.103	0.098	0.087	0.091	0.086	0.088	0.084	0.064	0.044	0.076	0.076	0.092	0.094	0.077	0.081	0.104	0.107	0.186
2740	Form_3370	CASP8AP2	LOC108717969	gnl|gene35853|XL-9_2-gene35853|rna75970|	766	23	FCQENLSPSKQLN	K.EDEDNVAQTVFCQENLSPSK.Q	CASP8-associated protein 2 (Fragment)						0.107	0.067	0.097	0.075	0.121	0.109	0.141	0.13	0.138	0.008	0.007	0.112	0.121	0.103	0.117	0.086	0.097	0.075	0.083	0.069	0.069	0.067	0.131	0.088	0.109	0.096	0.113	0.115	0.115	0.118	0.104	0.006	0.005
2741	Form_3374	CASP8AP2	LOC108717969	gnl|gene35853|XL-9_2-gene35853|rna75970|	947	23.8	TNINEDSVSFQRD	K.QTAVVQTNINEDSVSFQR.D	CASP8-associated protein 2 (Fragment)						0.03	0.066	0.204	0.152	0.118	0.095	0.054	0.072	0.069	0.068	0.071	0.112	0.121	0.103	0.117	0.086	0.097	0.075	0.083	0.069	0.069	0.067	0.036	0.085	0.224	0.19	0.108	0.098	0.043	0.064	0.051	0.05	0.051
2742	Form_3373	CASP8AP2	LOC108717969	gnl|gene35853|XL-9_2-gene35853|rna75970|	1562	25.7	GEILETSLVNVSN	K.TVDGEILETSLVNVSNK.A	CASP8-associated protein 2 (Fragment)						0.024	0.054	0.155	0.149	0.156	0.126	0.141	0.095	0.077	0.008	0.014	0.112	0.121	0.103	0.117	0.086	0.097	0.075	0.083	0.069	0.069	0.067	0.029	0.07	0.171	0.187	0.144	0.131	0.113	0.084	0.057	0.006	0.01
2743	Form_3371	CASP8AP2	LOC108717969	gnl|gene35853|XL-9_2-gene35853|rna75970|	1596	45.6	KPPEPLSPSKDST	K.QTVSLFKPPEPLSPSK.D	CASP8-associated protein 2 (Fragment)						0.099	0.075	0.111	0.099	0.126	0.11	0.13	0.119	0.113	0.007	0.01	0.112	0.121	0.103	0.117	0.086	0.097	0.075	0.083	0.069	0.069	0.067	0.119	0.098	0.123	0.124	0.116	0.115	0.105	0.106	0.084	0.005	0.007
2744	Form_3375	CASP8AP2	LOC108717969	gnl|gene35853|XL-9_2-gene35853|rna75970|	1645	17.1	IICNSGSPESIAQ	K.DSIICNSGSPESIAQVNWNDK.A	CASP8-associated protein 2 (Fragment)						0.077	0.048	0.093	0.109	0.111	0.095	0.138	0.119	0.133	0.034	0.044	0.112	0.121	0.103	0.117	0.086	0.097	0.075	0.083	0.069	0.069	0.067	0.096	0.064	0.106	0.142	0.106	0.102	0.115	0.11	0.102	0.026	0.033
2745	Form_3372	CASP8AP2	LOC108717969	gnl|gene35853|XL-9_2-gene35853|rna75970|	1724	24	TDQLSSSPKDSSK	R.SASDCTDQLSSSPK.D	CASP8-associated protein 2 (Fragment)						0.025	0.012	0.142	0.091	0.181	0.123	0.134	0.118	0.159	0.006	0.009	0.112	0.121	0.103	0.117	0.086	0.097	0.075	0.083	0.069	0.069	0.067	0.031	0.016	0.164	0.12	0.175	0.134	0.113	0.11	0.123	0.005	0.007
902	Form_1106	CAST	cast.S	gnl|gene14235|XL-9_2-gene14235|rna41489|	505;511	43.9	DFELSCSPTVQTT;SPTVQTTPAVKPK	K.DFELSCSPTVQTTPAVK.P	Calpain inhibitor						0.006	0.006	0.108	0.113	0.093	0.136	0.126	0.189	0.198	0.007	0.017	0.097	0.105	0.093	0.091	0.079	0.079	0.076	0.086	0.072	0.115	0.106	0.007	0.008	0.122	0.125	0.089	0.13	0.116	0.197	0.173	0.01	0.022
902	Form_1108	CAST	cast.S	gnl|gene14235|XL-9_2-gene14235|rna41489|	505	43.9	DFELSCSPTVQTT	K.DFELSCSPTVQTTPAVK.P	Calpain inhibitor						0.039	0.019	0.096	0.118	0.136	0.144	0.124	0.135	0.165	0.01	0.014	0.097	0.105	0.093	0.091	0.079	0.079	0.076	0.086	0.072	0.115	0.106	0.045	0.024	0.107	0.129	0.129	0.137	0.113	0.14	0.143	0.014	0.018
903	Form_1107	CAST	cast.S	gnl|gene14235|XL-9_2-gene14235|rna41489|	802	25.9	SGSDVVSCSKAST	K.GSGSDVVSCSK.A	Calpain inhibitor						0.002	0.002	0.099	0.116	0.069	0.155	0.125	0.223	0.199	0.005	0.005	0.097	0.105	0.093	0.091	0.079	0.079	0.076	0.086	0.072	0.115	0.106	0.002	0.002	0.112	0.129	0.067	0.15	0.116	0.234	0.175	0.007	0.007
3596	Form_4414	CAST	calp1	gnl|gene44505|XL-9_2-gene44505|rna88456|	50	43.3	VVASSASAVKAAA	K.AKPEVVVASSASAVK.A	Calpain inhibitor						0.002	0.003	0.09	0.099	0.071	0.112	0.128	0.227	0.245	0.01	0.014	0.114	0.092	0.118	0.097	0.108	0.094	0.089	0.072	0.084	0.056	0.076	0.003	0.003	0.119	0.108	0.086	0.119	0.128	0.184	0.232	0.006	0.012
391	Form__504	CBX2	cbx2.L	gnl|gene11813|XL-9_2-gene11813|rna34299|	286;291	5000	SLFKPRSEAEISP;RSEAEISPAMPKT	K.PRSEAEISPAMPK.T	Chromobox protein homolog 2						0.048	0.04	0.251	0.203	0.101	0.134	0.08	0.066	0.053	0.008	0.016	0.069	0.078	0.094	0.098	0.098	0.099	0.086	0.096	0.102	0.102	0.078	0.035	0.033	0.252	0.212	0.106	0.141	0.073	0.068	0.058	0.009	0.013
391	Form__505	CBX2	cbx2.L	gnl|gene11813|XL-9_2-gene11813|rna34299|	291	5000	RSEAEISPAMPKT	K.PRSEAEISPAMPK.T	Chromobox protein homolog 2						0.05	0.046	0.134	0.149	0.108	0.151	0.11	0.112	0.088	0.023	0.029	0.069	0.078	0.094	0.098	0.098	0.099	0.086	0.096	0.102	0.102	0.078	0.037	0.038	0.135	0.156	0.113	0.16	0.101	0.115	0.096	0.025	0.024
2126	Form_2602	CBX3	cbx3.L	gnl|gene20281|XL-9_2-gene20281|rna59205|	91	32.2	DSNKRKSVSDSES	K.RKSVSDSESEDSK.S	Chromobox protein homolog 3						0.007	0.002	0.108	0.074	0.154	0.109	0.187	0.094	0.249	0.004	0.012	0.095	0.087	0.1	0.103	0.107	0.114	0.08	0.091	0.083	0.076	0.064	0.007	0.002	0.116	0.082	0.177	0.133	0.16	0.092	0.222	0.003	0.008
2126	Form_2603	CBX3	cbx3.L	gnl|gene20281|XL-9_2-gene20281|rna59205|	91;93	32.2	DSNKRKSVSDSES;NKRKSVSDSESED	K.RKSVSDSESEDSK.S	Chromobox protein homolog 3	GN:CBX3|CBX3|human|Q13185	0;0	93;95	DGTKRKSLSDSES;TKRKSLSDSESDD	3;NaN	0.006	0.002	0.106	0.063	0.164	0.102	0.179	0.083	0.278	0.001	0.016	0.095	0.087	0.1	0.103	0.107	0.114	0.08	0.091	0.083	0.076	0.064	0.006	0.002	0.114	0.07	0.189	0.125	0.154	0.081	0.248	0.001	0.011
1881	Form_2312	CC2D1A	cc2d1a.L	gnl|gene19047|XL-9_2-gene19047|rna55602|	258	20.7	LPKPLSSPVAVPS	K.PLSSPVAVPSPAPTVPSTVPNEDR.A	Coiled-coil and C2 domain-containing protein 1A						0.007	0.013	0.135	0.126	0.134	0.148	0.135	0.103	0.133	0.024	0.041	0.1	0.091	0.102	0.099	0.102	0.098	0.087	0.084	0.086	0.071	0.079	0.007	0.013	0.148	0.134	0.147	0.156	0.126	0.093	0.123	0.018	0.035
3883	Form_4770	CCDC115	LOC733352.L	gnl|gene47154|XL-9_2-gene47154|rna92188|	148	38.4	RKGPVETPKPQST	K.GPVETPKPQSTESAAQK.G	Coiled-coil domain-containing protein 115						0.004	0.009	0.151	0.102	0.076	0.101	0.115	0.143	0.134	0.078	0.089	0.101	0.105	0.109	0.113	0.098	0.118	0.083	0.105	0.062	0.05	0.056	0.004	0.01	0.182	0.128	0.082	0.132	0.106	0.166	0.092	0.043	0.055
1472	Form_1807	CCDC12	ccdc12.L	gnl|gene17031|XL-9_2-gene17031|rna49768|	156	133.2	NQEDEDSDxxxxx	K.GQEEELATAVASANQEDEDSD.-	Coiled-coil domain-containing protein 12						0.107	0.057	0.126	0.115	0.147	0.118	0.072	0.088	0.118	0.014	0.039	0.077	0.089	0.083	0.082	0.077	0.078	0.117	0.111	0.106	0.092	0.088	0.092	0.057	0.117	0.106	0.127	0.103	0.095	0.11	0.14	0.014	0.038
2979	Form_3662	CCDC124	ccdc124.L	gnl|gene3858|XL-9_2-gene3858|rna11248|	151	60.2	DAIAALSVGKELD	R.TVEDAIAALSVGK.E	Coiled-coil domain-containing protein 124						0.011	0.02	0.096	0.087	0.093	0.114	0.161	0.19	0.208	0.01	0.011	0.132	0.096	0.108	0.118	0.096	0.096	0.08	0.075	0.077	0.055	0.067	0.017	0.022	0.118	0.116	0.101	0.124	0.146	0.162	0.182	0.006	0.008
2980	Form_3663	CCDC124	ccdc124.L	gnl|gene3858|XL-9_2-gene3858|rna11248|	216	28.2	QHAMYNSHxxxxx	K.SPENPMNQQHAMYNSH.-	Coiled-coil domain-containing protein 124						0.043	0.06	0.128	0.101	0.134	0.152	0.129	0.118	0.115	0.007	0.013	0.132	0.096	0.108	0.118	0.096	0.096	0.08	0.075	0.077	0.055	0.067	0.061	0.061	0.147	0.127	0.137	0.155	0.11	0.094	0.094	0.004	0.009
4442	Form_5450	CCDC124	ccdc124.S	gnl|gene6035|XL-9_2-gene6035|rna17664|	216	55.9	KYATYNSHxxxxx	K.YATYNSH.-	Coiled-coil domain-containing protein 124						0.062	0.041	0.138	0.144	0.12	0.17	0.088	0.095	0.126	0.006	0.01	0.087	0.08	0.089	0.075	0.099	0.074	0.11	0.102	0.099	0.09	0.096	0.06	0.037	0.137	0.121	0.133	0.141	0.108	0.108	0.139	0.006	0.011
4235	Form_5197	CCDC22	LOC108704486	gnl|gene50891|XL-9_2-gene50891|rna97577|	313	5000	FDLDGGSDQKKGS	R.AFDLDGGSDQK.K	Coiled-coil domain-containing protein 22						0.016	0.011	0.063	0.091	0.11	0.109	0.14	0.178	0.26	0.003	0.019	0.094	0.087	0.097	0.093	0.1	0.096	0.09	0.089	0.093	0.08	0.082	0.016	0.01	0.066	0.091	0.118	0.113	0.135	0.17	0.26	0.003	0.017
2910	Form_3582	CCDC43	MGC81882	gnl|gene37863|XL-9_2-gene37863|rna78740|	132	91.9	AQYANVTDEEDED	K.ATLLAQYANVTDEEDEDEEDEMIGASAINPDK.S	Coiled-coil domain-containing protein 43	GN:CCDC43|CCDC43|human|Q96MW1	0	139	AQYADVTDEEDEA	NaN	0.112	0.058	0.071	0.074	0.096	0.074	0.117	0.108	0.136	0.06	0.094	0.084	0.095	0.099	0.09	0.093	0.105	0.094	0.098	0.086	0.076	0.08	0.104	0.061	0.078	0.073	0.098	0.086	0.121	0.117	0.129	0.05	0.083
3778	Form_4645	CCDC43	ccdc43.S	gnl|gene46188|XL-9_2-gene46188|rna90839|	132	123.4	AQYANVTDEEDED	K.AALLAQYANVTDEEDEDEDGEINGASAINPEK.S	Coiled-coil domain-containing protein 43	GN:CCDC43|CCDC43|human|Q96MW1	0	139	AQYADVTDEEDEA	NaN	0.09	0.073	0.074	0.081	0.095	0.097	0.105	0.117	0.11	0.051	0.107	0.104	0.092	0.098	0.099	0.103	0.094	0.09	0.089	0.091	0.07	0.071	0.102	0.074	0.079	0.088	0.107	0.1	0.104	0.114	0.11	0.039	0.083
1230	Form_1525	CCDC6	ccdc6.S	gnl|gene15840|XL-9_2-gene15840|rna46279|	226;230	5000	KLDQPVSAPPSPR;PVSAPPSPRDISM	K.LDQPVSAPPSPR.D	Coiled-coil domain-containing protein 6	GN:CCDC6|CCDC6|human|Q16204	0;0	240;244	KLDQPVSAPPSPR;PVSAPPSPRDISM	NaN;2	0.043	0.033	0.117	0.115	0.141	0.133	0.122	0.116	0.157	0.009	0.012	0.1	0.104	0.096	0.098	0.093	0.1	0.09	0.099	0.074	0.071	0.076	0.047	0.037	0.122	0.122	0.142	0.144	0.119	0.124	0.126	0.007	0.01
4366	Form_5361	CCDC61	ccdc61.L	gnl|gene5566|XL-9_2-gene5566|rna16289|	277	133.9	SNELAMYKRGRVT	K.VKSLSNELAMYK.R	Centrosomal protein CCDC61	GN:CCDC61|CCDC61|human|Q9Y6R9	0	279	TSELALYKRGRRT	NaN	0.024	0.007	0.108	0.123	0.154	0.208	0.093	0.14	0.124	0.012	0.007	0.082	0.11	0.069	0.057	0.07	0.068	0.104	0.087	0.106	0.12	0.127	0.025	0.01	0.094	0.088	0.136	0.178	0.122	0.153	0.166	0.018	0.011
2960	Form_3642	CCDC66	LOC108704020	gnl|gene38401|XL-9_2-gene38401|rna79529|	333	38.2	RGSSFSSPELPAA	R.GSSFSSPELPAAIR.S	Coiled-coil domain-containing protein 66						0.022	0.032	0.173	0.11	0.121	0.118	0.119	0.109	0.134	0.02	0.042	0.084	0.087	0.097	0.095	0.108	0.108	0.088	0.088	0.087	0.084	0.074	0.02	0.03	0.178	0.111	0.139	0.135	0.111	0.102	0.124	0.018	0.033
2961	Form_3641	CCDC66	LOC108704020	gnl|gene38401|XL-9_2-gene38401|rna79529|	675	24.6	IWRQSPSPEVPIE	R.QSPSPEVPIEFQAQSR.A	Coiled-coil domain-containing protein 66						0.067	0.051	0.101	0.113	0.093	0.105	0.103	0.098	0.121	0.051	0.097	0.084	0.087	0.097	0.095	0.108	0.108	0.088	0.088	0.087	0.084	0.074	0.061	0.048	0.107	0.117	0.11	0.124	0.099	0.094	0.115	0.047	0.078
3589	Form_4404	CCDC88A	ccdc88a.S	gnl|gene44429|XL-9_2-gene44429|rna88343|	1565	13.7	KSKDGASYEDLSA	K.DGASYEDLSAR.S	Girdin (Fragment)						0.085	0.061	0.126	0.114	0.108	0.115	0.139	0.138	0.105	0.004	0.006	0.082	0.067	0.062	0.089	0.105	0.128	0.078	0.083	0.099	0.122	0.086	0.079	0.046	0.088	0.114	0.128	0.166	0.122	0.129	0.117	0.006	0.006
3590	Form_4405	CCDC88A	ccdc88a.S	gnl|gene44429|XL-9_2-gene44429|rna88343|	1682	39.9	SKMNLGSPGSERV	K.MNLGSPGSER.V	Girdin (Fragment)						0.088	0.111	0.191	0.115	0.103	0.077	0.11	0.103	0.086	0.003	0.013	0.082	0.067	0.062	0.089	0.105	0.128	0.078	0.083	0.099	0.122	0.086	0.085	0.088	0.14	0.121	0.128	0.116	0.101	0.101	0.101	0.005	0.013
3591	Form_4406	CCDC88A	ccdc88a.S	gnl|gene44429|XL-9_2-gene44429|rna88343|	1737	45.3	QSPTLLSPGISRT	R.SLSSSAESAGFQSPTLLSPGISR.T	Girdin (Fragment)						0.121	0.096	0.062	0.195	0.133	0.086	0.1	0.097	0.077	0.012	0.023	0.082	0.067	0.062	0.089	0.105	0.128	0.078	0.083	0.099	0.122	0.086	0.111	0.072	0.043	0.194	0.156	0.123	0.087	0.09	0.085	0.016	0.022
3591	Form_4407	CCDC88A	ccdc88a.S	gnl|gene44429|XL-9_2-gene44429|rna88343|	1732	22.7	ESAGFQSPTLLSP	R.SLSSSAESAGFQSPTLLSPGISR.T	Girdin (Fragment)						0.052	0.175	0.114	0.077	0.082	0.063	0.119	0.103	0.075	0.051	0.088	0.082	0.067	0.062	0.089	0.105	0.128	0.078	0.083	0.099	0.122	0.086	0.05	0.137	0.082	0.08	0.1	0.094	0.108	0.1	0.087	0.073	0.088
2164	Form_2647	CCDC9	ccdc9.L	gnl|gene20490|XL-9_2-gene20490|rna59832|	361	126.6	MFKDGASPHVEDE	K.DGASPHVEDEPVSR.R	Coiled-coil domain-containing protein 9						0.015	0.01	0.173	0.119	0.12	0.116	0.113	0.104	0.124	0.04	0.066	0.082	0.095	0.097	0.107	0.088	0.112	0.092	0.103	0.08	0.084	0.06	0.013	0.01	0.179	0.136	0.113	0.139	0.111	0.114	0.106	0.036	0.042
2165	Form_2648	CCDC9	ccdc9.L	gnl|gene20490|XL-9_2-gene20490|rna59832|	516	120.6	PPTQNETPKLNLT	K.EQIPPTQNETPK.L	Coiled-coil domain-containing protein 9						0.067	0.037	0.112	0.097	0.121	0.093	0.095	0.095	0.147	0.051	0.085	0.082	0.095	0.097	0.107	0.088	0.112	0.092	0.103	0.08	0.084	0.06	0.06	0.039	0.12	0.114	0.117	0.115	0.096	0.108	0.129	0.047	0.056
2166	Form_2649	CCDC9	ccdc9.L	gnl|gene20490|XL-9_2-gene20490|rna59832|	522	67.7	TPKLNLTPTQSED	K.LNLTPTQSEDK.S	Coiled-coil domain-containing protein 9						0.018	0.013	0.085	0.089	0.125	0.105	0.125	0.114	0.162	0.063	0.101	0.082	0.095	0.097	0.107	0.088	0.112	0.092	0.103	0.08	0.084	0.06	0.016	0.014	0.091	0.105	0.121	0.129	0.127	0.129	0.143	0.058	0.067
4337	Form_5322	CCNB3	ccnb3.L	gnl|gene5379|XL-9_2-gene5379|rna15772|	42;43	19.6	QTKRSPSSPQGGA;TKRSPSSPQGGAK	K.RSPSSPQGGAK.K	G2/mitotic-specific cyclin-B3						0.074	0.086	0.324	0.083	0.112	0.101	0.086	0.069	0.061	0.004	0.003	0.163	0.158	0.176	0.158	0.06	0.041	0.047	0.032	0.042	0.031	0.091	0.104	0.117	0.493	0.113	0.058	0.036	0.035	0.019	0.022	0.001	0.002
1070	Form_1325	CCNC	ccnc.L	gnl|gene1495|XL-9_2-gene1495|rna4345|	266	61.9	PKPPPNSDGEQGT	K.PKPPPNSDGEQGTNGSQSSGYSQS.-	Cyclin-C	GN:CCNC|CCNC|human|P24863	0	266	PKPPPNSEGEQGP	NaN	0.11	0.076	0.139	0.125	0.11	0.096	0.104	0.113	0.115	0.006	0.005	0.093	0.087	0.091	0.089	0.105	0.12	0.088	0.09	0.074	0.077	0.087	0.111	0.072	0.137	0.12	0.125	0.125	0.099	0.11	0.092	0.005	0.005
3982	Form_4892	CCNE1	ccne1.L	gnl|gene4820|XL-9_2-gene4820|rna14078|	97;102	73.2	FASLRFSPVSVSP;FSPVSVSPLPRLG	R.FSPVSVSPLPR.L	G1/S-specific cyclin-E1						0.027	0.016	0.079	0.11	0.146	0.135	0.135	0.188	0.108	0.019	0.037	0.046	0.057	0.044	0.073	0.09	0.149	0.11	0.113	0.131	0.115	0.071	0.012	0.009	0.034	0.079	0.129	0.197	0.146	0.208	0.139	0.022	0.026
5001	Form_6123	CCNL1	ccnl1.L	gnl|gene858|XL-9_2-gene858|rna2517|	315	41.6	LSMGGFSPASKPS	K.GLNPDGTPAILSMGGFSPASK.P	Cyclin-L1	GN:CCNL1|CCNL1|human|Q9UK58	0	335	STLGGFSPASKPS	NaN	0.085	0.065	0.105	0.107	0.114	0.102	0.114	0.109	0.103	0.032	0.065	0.084	0.081	0.102	0.09	0.102	0.109	0.094	0.085	0.092	0.086	0.073	0.077	0.057	0.116	0.104	0.126	0.12	0.116	0.1	0.103	0.03	0.051
5002	Form_6122	CCNL1	ccnl1.L	gnl|gene858|XL-9_2-gene858|rna2517|	441	16.6	GHKRKKSRSPSTN	K.SRSPSTNRDHAELAK.K	Cyclin-L1						0.066	0.006	0.135	0.121	0.148	0.115	0.137	0.083	0.173	0.004	0.013	0.084	0.081	0.102	0.09	0.102	0.109	0.094	0.085	0.092	0.086	0.073	0.058	0.005	0.144	0.114	0.158	0.132	0.135	0.074	0.167	0.004	0.01
271	Form__357	CCP110	ccp110.S	gnl|gene11249|XL-9_2-gene11249|rna32716|	601	47.2	PRDRSGSLQLTST	R.SGSLQLTSTDLGK.G	Centriolar coiled-coil protein of 110 kDa						0.052	0.032	0.084	0.111	0.141	0.165	0.119	0.144	0.138	0.005	0.007	0.06	0.074	0.061	0.077	0.08	0.09	0.099	0.117	0.119	0.119	0.104	0.034	0.026	0.056	0.093	0.123	0.162	0.128	0.184	0.179	0.007	0.008
272	Form__356	CCP110	ccp110.S	gnl|gene11249|XL-9_2-gene11249|rna32716|	671	16.8	RLKDTDSPTQTLD	K.DTDSPTQTLDNDSMILDR.S	Centriolar coiled-coil protein of 110 kDa						0.037	0.018	0.061	0.1	0.155	0.128	0.131	0.126	0.216	0.011	0.017	0.06	0.074	0.061	0.077	0.08	0.09	0.099	0.117	0.119	0.119	0.104	0.023	0.014	0.039	0.081	0.13	0.121	0.136	0.154	0.269	0.014	0.019
276	Form__361	CCS	ccs.L	gnl|gene11281|XL-9_2-gene11281|rna32808|	269	100.8	RNTQLQSPPANLx	R.NTQLQSPPANL.-	Copper chaperone for superoxide dismutase						0.031	0.02	0.097	0.091	0.139	0.147	0.104	0.103	0.172	0.047	0.049	0.079	0.074	0.075	0.091	0.083	0.075	0.101	0.118	0.099	0.1	0.106	0.027	0.016	0.079	0.09	0.126	0.12	0.114	0.133	0.186	0.051	0.057
3673	Form_4516	CCSMST1	c16orf91.L	gnl|gene4522|XL-9_2-gene4522|rna13206|	109	47.7	EQLQDESDNKxxx	R.QETDVDESIYKPIEQLQDESDNK.-	Protein CCSMST1						0.04	0.027	0.058	0.073	0.114	0.125	0.151	0.152	0.24	0.012	0.009	0.094	0.081	0.104	0.099	0.103	0.104	0.086	0.067	0.078	0.097	0.087	0.043	0.025	0.069	0.082	0.134	0.148	0.148	0.116	0.214	0.013	0.009
1072	Form_1329	CCT3	cct3.L	gnl|gene14983|XL-9_2-gene14983|rna43729|	251	36.4	EYKKGESQTEIEI	K.KGESQTEIEITR.E	T-complex protein 1 subunit gamma	GN:CCT3|CCT3|human|P49368	0	252	EYKKGESQTDIEI	NaN	0.054	0.034	0.073	0.095	0.121	0.132	0.128	0.154	0.19	0.008	0.012	0.09	0.091	0.094	0.094	0.091	0.093	0.094	0.091	0.096	0.083	0.085	0.052	0.033	0.074	0.096	0.118	0.132	0.129	0.151	0.196	0.007	0.011
801	Form__986	CCT4	cct4.S	gnl|gene13674|XL-9_2-gene13674|rna39786|	269	56	DNQIVVSDYAQMD	K.TDMDNQIVVSDYAQMDR.V	T-complex protein 1 subunit delta	GN:CCT4|CCT4|human|P50991	0	267	DNQIVVSDYAQMD	NaN	0.082	0.062	0.085	0.105	0.126	0.128	0.104	0.122	0.151	0.014	0.02	0.093	0.094	0.093	0.091	0.089	0.09	0.095	0.093	0.095	0.084	0.084	0.083	0.063	0.086	0.104	0.122	0.125	0.107	0.123	0.156	0.013	0.018
3734	Form_4593	CCT5	cct5.S	gnl|gene45672|XL-9_2-gene45672|rna90166|	485	5000	SRQVKESNPALGI	K.ESNPALGIDCLHK.G	T-complex protein 1 subunit epsilon						0.086	0.059	0.11	0.11	0.124	0.126	0.119	0.121	0.127	0.008	0.01	0.089	0.091	0.097	0.095	0.093	0.09	0.093	0.085	0.101	0.081	0.085	0.083	0.058	0.115	0.113	0.125	0.122	0.12	0.111	0.138	0.007	0.009
4125	Form_5059	CCT8	cct8.L	gnl|gene4994|XL-9_2-gene4994|rna14589|	261	65.9	GTVLINSAQELMN	K.GTVLINSAQELMNFSK.G	T-complex protein 1 subunit theta						0.062	0.065	0.066	0.093	0.107	0.124	0.122	0.177	0.161	0.009	0.014	0.089	0.093	0.095	0.093	0.09	0.092	0.092	0.093	0.087	0.089	0.088	0.06	0.066	0.069	0.095	0.105	0.125	0.123	0.18	0.153	0.009	0.013
1734	Form_2135	CD2AP	cd2ap.S	gnl|gene18394|XL-9_2-gene18394|rna53732|	354	5000	PPPPIKSPAAPKP	K.SPAAPKPELR.I	CD2-associated protein						0.018	0.014	0.158	0.156	0.128	0.139	0.131	0.122	0.122	0.001	0.012	0.105	0.103	0.098	0.095	0.101	0.093	0.092	0.089	0.085	0.066	0.072	0.02	0.015	0.165	0.158	0.138	0.138	0.129	0.116	0.111	0.001	0.009
3029	Form_3719	CD2AP	cd2ap.S	gnl|gene39073|XL-9_2-gene39073|rna80528|	395	29.5	EKPAFPSPTSKPN	K.PAFPSPTSK.P	CD2-associated protein						0.024	0.03	0.133	0.123	0.129	0.124	0.12	0.125	0.104	0.037	0.051	0.096	0.097	0.094	0.094	0.095	0.096	0.094	0.092	0.087	0.078	0.076	0.025	0.032	0.136	0.126	0.133	0.129	0.122	0.125	0.098	0.031	0.042
3030	Form_3718	CD2AP	cd2ap.S	gnl|gene39073|XL-9_2-gene39073|rna80528|	518	5000	ILSRTKSVEVEPA	K.SVEVEPAAK.S	CD2-associated protein						0.047	0.024	0.113	0.097	0.138	0.113	0.141	0.128	0.185	0.005	0.01	0.096	0.097	0.094	0.094	0.095	0.096	0.094	0.092	0.087	0.078	0.076	0.049	0.025	0.114	0.098	0.141	0.117	0.143	0.127	0.173	0.004	0.008
501	Form__635	CD2BP2	cd2bp2.L	gnl|gene12253|XL-9_2-gene12253|rna35616|	139	21.8	VSTDDYSDSEEGR	K.EPTAPAVSTDDYSDSEEGR.A	CD2 antigen cytoplasmic tail-binding protein 2						0.111	0.082	0.106	0.115	0.125	0.103	0.104	0.115	0.121	0.008	0.01	0.103	0.09	0.122	0.09	0.091	0.103	0.095	0.081	0.094	0.06	0.07	0.119	0.077	0.135	0.108	0.119	0.111	0.103	0.097	0.119	0.005	0.007
3660	Form_4501	CDAN1	cdan1.L	gnl|gene45104|XL-9_2-gene45104|rna89328|	67;71	29.3	LTNGPSTPAKTPT;PSTPAKTPTSKAI	R.EQTSQILTNGPSTPAKTPTSK.A	Codanin-1						0.007	0.006	0.154	0.104	0.143	0.11	0.131	0.104	0.113	0.061	0.067	0.078	0.079	0.086	0.095	0.099	0.096	0.094	0.097	0.099	0.084	0.093	0.006	0.005	0.141	0.105	0.151	0.113	0.131	0.108	0.119	0.055	0.066
3660	Form_4503	CDAN1	cdan1.L	gnl|gene45104|XL-9_2-gene45104|rna89328|	67	18.7	LTNGPSTPAKTPT	R.EQTSQILTNGPSTPAK.T	Codanin-1						0.109	0.082	0.108	0.109	0.116	0.102	0.089	0.081	0.091	0.043	0.07	0.078	0.079	0.086	0.095	0.099	0.096	0.094	0.097	0.099	0.084	0.093	0.093	0.071	0.102	0.113	0.126	0.107	0.092	0.086	0.099	0.04	0.071
3660	Form_4504	CDAN1	cdan1.L	gnl|gene45104|XL-9_2-gene45104|rna89328|	71	29.3	PSTPAKTPTSKAI	R.EQTSQILTNGPSTPAKTPTSK.A	Codanin-1						0.023	0.024	0.121	0.137	0.125	0.15	0.115	0.112	0.079	0.055	0.06	0.078	0.079	0.086	0.095	0.099	0.096	0.094	0.097	0.099	0.084	0.093	0.019	0.02	0.111	0.139	0.132	0.154	0.116	0.116	0.084	0.049	0.06
3661	Form_4502	CDAN1	cdan1.L	gnl|gene45104|XL-9_2-gene45104|rna89328|	220	25.9	EIQGDVSWSANRR	R.SNDEEIQGDVSWSANRR.I	Codanin-1						0.008	0.015	0.131	0.144	0.122	0.121	0.144	0.127	0.11	0.038	0.039	0.078	0.079	0.086	0.095	0.099	0.096	0.094	0.097	0.099	0.084	0.093	0.007	0.013	0.12	0.145	0.128	0.123	0.144	0.131	0.116	0.034	0.039
3662	Form_4497	CDAN1	cdan1.L	gnl|gene45104|XL-9_2-gene45104|rna89328|	315;321	5000	VKEGNCSPANGGS;SPANGGSLHEERE	K.EGNCSPANGGSLHEER.E	Codanin-1						0.037	0.013	0.149	0.095	0.106	0.117	0.13	0.133	0.169	0.023	0.027	0.078	0.079	0.086	0.095	0.099	0.096	0.094	0.097	0.099	0.084	0.093	0.031	0.011	0.137	0.096	0.112	0.12	0.13	0.138	0.178	0.021	0.027
3663	Form_4505	CDAN1	cdan1.L	gnl|gene45104|XL-9_2-gene45104|rna89328|	350	28.1	VLLDPVTPTKCYS	K.LMQHTSSPVLLDPVTPTK.C	Codanin-1						0.009	0.007	0.057	0.076	0.101	0.12	0.149	0.213	0.23	0.026	0.013	0.078	0.079	0.086	0.095	0.099	0.096	0.094	0.097	0.099	0.084	0.093	0.007	0.006	0.051	0.075	0.105	0.12	0.146	0.216	0.238	0.023	0.013
3664	Form_4498	CDAN1	cdan1.L	gnl|gene45104|XL-9_2-gene45104|rna89328|	360;365	48.2	CYSRNMSLSADTL;MSLSADTLLHADN	R.NMSLSADTLLHADNAK.V	Codanin-1						0.004	0.002	0.135	0.116	0.133	0.148	0.161	0.151	0.135	0.006	0.009	0.078	0.079	0.086	0.095	0.099	0.096	0.094	0.097	0.099	0.084	0.093	0.003	0.002	0.122	0.116	0.139	0.15	0.159	0.154	0.141	0.005	0.009
3664	Form_4499	CDAN1	cdan1.L	gnl|gene45104|XL-9_2-gene45104|rna89328|	360	48.2	CYSRNMSLSADTL	R.NMSLSADTLLHADNAK.V	Codanin-1						0.008	0.013	0.155	0.133	0.155	0.138	0.139	0.124	0.125	0.004	0.006	0.078	0.079	0.086	0.095	0.099	0.096	0.094	0.097	0.099	0.084	0.093	0.007	0.011	0.141	0.134	0.162	0.14	0.138	0.127	0.131	0.004	0.006
3665	Form_4500	CDAN1	cdan1.L	gnl|gene45104|XL-9_2-gene45104|rna89328|	1307	41.3	AVAAMTSPxxxxx	K.AVAAMTSP.-	Codanin-1						0.041	0.019	0.173	0.104	0.14	0.137	0.12	0.121	0.128	0.007	0.01	0.078	0.079	0.086	0.095	0.099	0.096	0.094	0.097	0.099	0.084	0.093	0.034	0.016	0.159	0.106	0.148	0.141	0.121	0.125	0.135	0.006	0.01
3090	Form_3797	CDC123	LOC108711222	gnl|gene39796|XL-9_2-gene39796|rna81532|	52	61.6	VSGREESPGCSQR	R.EESPGCSQR.D	Cell division cycle protein 123 homolog						0.052	0.033	0.086	0.078	0.102	0.106	0.121	0.173	0.214	0.009	0.024	0.092	0.09	0.1	0.104	0.101	0.107	0.093	0.086	0.089	0.073	0.066	0.051	0.032	0.092	0.087	0.11	0.121	0.12	0.159	0.203	0.007	0.017
3091	Form_3798	CDC123	LOC108711222	gnl|gene39796|XL-9_2-gene39796|rna81532|	314	13.8	KDFVDLSTGEDAH	K.DFVDLSTGEDAHK.L	Cell division cycle protein 123 homolog	GN:CDC123|CDC123|human|O75794	0	314	KDFVDLSTGEDAH	NaN	0.02	0.036	0.152	0.158	0.112	0.133	0.093	0.143	0.132	0.008	0.013	0.092	0.09	0.1	0.104	0.101	0.107	0.093	0.086	0.089	0.073	0.066	0.019	0.034	0.157	0.17	0.117	0.147	0.09	0.127	0.122	0.006	0.009
2134	Form_2613	CDC16	cdc16.L	gnl|gene20324|XL-9_2-gene20324|rna59356|	558	5000	TLKNIISPPWEER	K.NIISPPWEER.E	Cell division cycle protein 16 homolog	GN:CDC16|CDC16|human|Q13042	0	560	TLKNIISPPWDFR	1	0.015	0.032	0.119	0.125	0.118	0.136	0.126	0.115	0.112	0.056	0.046	0.083	0.088	0.086	0.087	0.087	0.096	0.091	0.098	0.092	0.097	0.095	0.014	0.031	0.112	0.119	0.112	0.143	0.125	0.123	0.113	0.059	0.048
1752	Form_2158	CDC20	cdc20.L	gnl|gene18459|XL-9_2-gene18459|rna53902|	55	30.8	ANTSTLSPMKASN	K.EGNCSSLNTSANTSTLSPMK.A	Cell division cycle protein 20 homolog						0.019	0.035	0.156	0.145	0.174	0.184	0.083	0.08	0.071	0.016	0.036	0.064	0.058	0.082	0.091	0.097	0.089	0.111	0.102	0.101	0.109	0.095	0.013	0.022	0.139	0.143	0.183	0.178	0.1	0.089	0.078	0.019	0.037
1098	Form_1360	CDC23	cdc23.S	gnl|gene150|XL-9_2-gene150|rna420|	572;580	56	TPTRRVSPLNLSS;LNLSSVTPxxxxx	R.RVSPLNLSSVTP.-	Cell division cycle protein 23 homolog	GN:CDC23|CDC23|human|Q9UJX2	1	588	TPTRRVSPLNLSS	NaN	0.015	0.009	0.059	0.084	0.096	0.116	0.151	0.157	0.183	0.063	0.068	0.096	0.101	0.102	0.098	0.097	0.098	0.085	0.085	0.078	0.08	0.08	0.016	0.01	0.068	0.093	0.106	0.129	0.146	0.152	0.162	0.057	0.062
1098	Form_1361	CDC23	cdc23.S	gnl|gene150|XL-9_2-gene150|rna420|	580	48.4	LNLSSVTPxxxxx	R.RVSPLNLSSVTP.-	Cell division cycle protein 23 homolog	GN:CDC23|CDC23|human|Q9UJX2	1	596	LNLSSVTPxxxxx	NaN	0.015	0.021	0.154	0.139	0.118	0.125	0.125	0.108	0.116	0.03	0.048	0.096	0.101	0.102	0.098	0.097	0.098	0.085	0.085	0.078	0.08	0.08	0.016	0.023	0.171	0.148	0.125	0.134	0.116	0.1	0.099	0.026	0.042
4983	Form_6103	CDC25C	cdc25c.S	gnl|gene8506|XL-9_2-gene8506|rna24762|	63	5000	SEAPPKSNPGLNI	K.SNPGLNIR.T	M-phase inducer phosphatase 3						0.002	0.017	0.361	0.134	0.118	0.106	0.096	0.08	0.079	0.002	0.005	0.101	0.095	0.09	0.098	0.09	0.098	0.098	0.087	0.086	0.082	0.076	0.002	0.017	0.352	0.142	0.115	0.113	0.102	0.075	0.074	0.002	0.004
4984	Form_6101	CDC25C	cdc25c.S	gnl|gene8506|XL-9_2-gene8506|rna24762|	136	47.1	APLPTESPDRMSS	K.RCLDLSNLGDETAPLPTESPDR.M	M-phase inducer phosphatase 3						0.015	0.041	0.085	0.07	0.122	0.118	0.168	0.204	0.168	0.003	0.006	0.101	0.095	0.09	0.098	0.09	0.098	0.098	0.087	0.086	0.082	0.076	0.016	0.042	0.083	0.075	0.12	0.126	0.18	0.194	0.158	0.003	0.005
4985	Form_6102	CDC25C	cdc25c.S	gnl|gene8506|XL-9_2-gene8506|rna24762|	231	26	VVDSQLSPTPENK	K.PVALLLPQEVVDSQLSPTPENK.V	M-phase inducer phosphatase 3						0.043	0.09	0.216	0.172	0.116	0.106	0.082	0.086	0.048	0.009	0.032	0.101	0.095	0.09	0.098	0.09	0.098	0.098	0.087	0.086	0.082	0.076	0.047	0.092	0.209	0.182	0.112	0.112	0.087	0.081	0.044	0.008	0.026
1171	Form_1452	CDC27	cdc27.L	gnl|gene1557|XL-9_2-gene1557|rna4527|	207	103.2	DTVLMETPQDTIE	R.QPDTVLMETPQDTIELNR.L	Cell division cycle protein 27 homolog	GN:CDC27|CDC27|human|P30260	0	205	ETVLTETPQDTIE	NaN	0.008	0.007	0.117	0.123	0.063	0.154	0.101	0.172	0.108	0.064	0.084	0.097	0.079	0.104	0.088	0.11	0.098	0.098	0.083	0.094	0.069	0.081	0.008	0.006	0.132	0.118	0.076	0.164	0.108	0.155	0.11	0.048	0.074
1172	Form_1453	CDC27	cdc27.L	gnl|gene1557|XL-9_2-gene1557|rna4527|	428	100.2	QTNLNDSLEISKL	K.GGVTQTNLNDSLEISK.L	Cell division cycle protein 27 homolog	GN:CDC27|CDC27|human|P30260	0	426	QPNINDSLEITKL	1	0.004	0.026	0.09	0.126	0.084	0.131	0.147	0.244	0.143	0	0.005	0.097	0.079	0.104	0.088	0.11	0.098	0.098	0.083	0.094	0.069	0.081	0.004	0.022	0.1	0.119	0.099	0.138	0.154	0.217	0.144	0	0.004
1173	Form_1451	CDC27	cdc27.L	gnl|gene1557|XL-9_2-gene1557|rna4527|	437;440	84.1	ISKLDSSIISEGK;LDSSIISEGKISN	K.LDSSIISEGK.I	Cell division cycle protein 27 homolog	GN:CDC27|CDC27|human|P30260	0	438	LDSSIISEGKIST	NaN	0.001	0.002	0.041	0.103	0.03	0.119	0.108	0.433	0.148	0.007	0.008	0.097	0.079	0.104	0.088	0.11	0.098	0.098	0.083	0.094	0.069	0.081	0.001	0.002	0.047	0.101	0.037	0.13	0.118	0.399	0.154	0.005	0.007
1173	Form_1454	CDC27	cdc27.L	gnl|gene1557|XL-9_2-gene1557|rna4527|	437	33.6	ISKLDSSIISEGK	K.LDSSIISEGK.I	Cell division cycle protein 27 homolog	GN:CDC27|CDC27|human|P30260	0	435	ITKLDSSIISEGK	NaN	0.01	0.025	0.116	0.133	0.098	0.162	0.119	0.183	0.143	0.004	0.007	0.097	0.079	0.104	0.088	0.11	0.098	0.098	0.083	0.094	0.069	0.081	0.01	0.021	0.127	0.124	0.114	0.168	0.123	0.16	0.142	0.003	0.006
4321	Form_5303	CDC42EP4	LOC108697789	gnl|gene5275|XL-9_2-gene5275|rna15439|	131	5000	DQLDWASPGNNFG	R.DQLDWASPGNNFGMK.H	Cdc42 effector protein 4						0.009	0.007	0.165	0.118	0.151	0.122	0.143	0.117	0.155	0.003	0.009	0.083	0.095	0.091	0.106	0.091	0.116	0.083	0.097	0.08	0.087	0.071	0.008	0.007	0.161	0.134	0.147	0.152	0.127	0.121	0.133	0.003	0.007
4865	Form_5960	CDC45	cdc45.L	gnl|gene8065|XL-9_2-gene8065|rna23518|	144	13.7	EEDGEDSGNESDG	R.QDDDLEIPAYDDIFNDDEEDGEDSGNESDGAEPSGK.R	Cell division control protein 45 homolog						0.023	0.02	0.05	0.035	0.083	0.051	0.179	0.203	0.334	0.001	0.022	0.082	0.083	0.103	0.11	0.097	0.118	0.088	0.092	0.084	0.078	0.065	0.021	0.018	0.057	0.042	0.089	0.066	0.174	0.206	0.31	0.001	0.016
4688	Form_5750	CDC5L	cdc5l.L	gnl|gene7315|XL-9_2-gene7315|rna21343|	511	5000	DRDQDDSIVEDAA	R.ELEDRDQDDSIVEDAADIEARK.Q	Cell division cycle 5-like protein						0.004	0.007	0.061	0.062	0.102	0.13	0.15	0.198	0.262	0.009	0.016	0.094	0.092	0.115	0.105	0.097	0.094	0.085	0.087	0.083	0.072	0.077	0.004	0.007	0.078	0.072	0.11	0.135	0.141	0.191	0.241	0.007	0.014
5026	Form_6150	CDC6	cdc6.S	gnl|gene8757|XL-9_2-gene8757|rna25496|	8	52	PSTRSRSQSSIQF	R.SRSQSSIQFPK.K	Cell division control protein 6 homolog						0.036	0.023	0.105	0.075	0.124	0.138	0.155	0.108	0.158	0.02	0.058	0.041	0.039	0.04	0.062	0.083	0.092	0.094	0.139	0.175	0.144	0.092	0.015	0.009	0.042	0.047	0.103	0.128	0.146	0.151	0.277	0.029	0.054
5027	Form_6151	CDC6	cdc6.S	gnl|gene8757|XL-9_2-gene8757|rna25496|	108	90.4	AAATPLSPLKKLQ	R.LLFDENQAAAATPLSPLK.K	Cell division control protein 6 homolog						0.052	0.049	0.066	0.062	0.058	0.101	0.151	0.143	0.109	0.07	0.139	0.041	0.039	0.04	0.062	0.083	0.092	0.094	0.139	0.175	0.144	0.092	0.021	0.019	0.026	0.038	0.048	0.092	0.141	0.197	0.19	0.1	0.127
5189	Form_6355	CDC6	cdc6.L	gnl|gene9532|XL-9_2-gene9532|rna27729|	192;195	5000	ENQAAATPVSPIK;AAATPVSPIKKVQ	R.LLFDENQAAATPVSPIK.K	Cell division control protein 6 homolog						0.032	0.018	0.108	0.105	0.126	0.171	0.165	0.137	0.122	0.004	0.013	0.027	0.026	0.029	0.045	0.064	0.095	0.105	0.159	0.166	0.193	0.091	0.009	0.005	0.033	0.05	0.085	0.171	0.183	0.229	0.213	0.009	0.012
4890	Form_5994	CDCA2	cdca2-like.L	gnl|gene8185|XL-9_2-gene8185|rna23836|	308;314	95.4	NAAKKPSPLTLPS;SPLTLPSPAEKAS	K.KPSPLTLPSPAEK.A	Cell division cycle-associated protein 2						0.013	0.007	0.079	0.062	0.057	0.064	0.086	0.225	0.163	0.101	0.142	0.055	0.093	0.083	0.09	0.083	0.121	0.099	0.067	0.104	0.105	0.1	0.008	0.007	0.072	0.061	0.052	0.085	0.093	0.165	0.186	0.116	0.156
4891	Form_5993	CDCA2	cdca2-like.L	gnl|gene8185|XL-9_2-gene8185|rna23836|	483	5000	TFGKALSPELFDR	K.ALSPELFDR.F	Cell division cycle-associated protein 2						0.041	0.024	0.099	0.098	0.118	0.095	0.101	0.184	0.133	0.052	0.055	0.055	0.093	0.083	0.09	0.083	0.121	0.099	0.067	0.104	0.105	0.1	0.025	0.025	0.091	0.098	0.109	0.128	0.111	0.137	0.154	0.061	0.061
4892	Form_5991	CDCA2	cdca2-like.L	gnl|gene8185|XL-9_2-gene8185|rna23836|	961;964	31.6	RLHRRSSALSLDQ;RRSSALSLDQSEG	R.RSSALSLDQSEGSAEK.S	Cell division cycle-associated protein 2						0.011	0.004	0.037	0.042	0.124	0.091	0.145	0.293	0.237	0.005	0.011	0.055	0.093	0.083	0.09	0.083	0.121	0.099	0.067	0.104	0.105	0.1	0.007	0.004	0.034	0.042	0.115	0.123	0.161	0.22	0.276	0.006	0.012
4892	Form_5992	CDCA2	cdca2-like.L	gnl|gene8185|XL-9_2-gene8185|rna23836|	961	30.6	RLHRRSSALSLDQ	R.RSSALSLDQSEGSAEK.S	Cell division cycle-associated protein 2						0.053	0.025	0.084	0.087	0.137	0.105	0.119	0.22	0.148	0.008	0.013	0.055	0.093	0.083	0.09	0.083	0.121	0.099	0.067	0.104	0.105	0.1	0.033	0.026	0.079	0.089	0.129	0.144	0.134	0.167	0.174	0.01	0.015
2824	Form_3481	CDCA3	LOC108696067	gnl|gene36869|XL-9_2-gene36869|rna77389|	44;48	128.8	PIEVGESPRNTPQ;GESPRNTPQTVKE	R.TPIEVGESPRNTPQTVK.E	Cell division cycle-associated protein 3						0.016	0.007	0.069	0.104	0.1	0.093	0.145	0.249	0.203	0.004	0.008	0.069	0.074	0.09	0.092	0.088	0.112	0.076	0.076	0.087	0.131	0.104	0.013	0.006	0.073	0.112	0.103	0.122	0.129	0.221	0.206	0.006	0.01
2824	Form_3482	CDCA3	LOC108696067	gnl|gene36869|XL-9_2-gene36869|rna77389|	44	128.8	PIEVGESPRNTPQ	R.TPIEVGESPR.N	Cell division cycle-associated protein 3						0.02	0.022	0.051	0.067	0.127	0.101	0.181	0.188	0.227	0.007	0.008	0.069	0.074	0.09	0.092	0.088	0.112	0.076	0.076	0.087	0.131	0.104	0.016	0.019	0.053	0.072	0.13	0.132	0.16	0.166	0.23	0.011	0.01
2825	Form_3483	CDCA3	LOC108696067	gnl|gene36869|XL-9_2-gene36869|rna77389|	70	22.3	EIFDPRSPTNGIT	K.EEEEEIPDSPEIFDPRSPTNGITR.T	Cell division cycle-associated protein 3						0.043	0.032	0.065	0.058	0.08	0.058	0.082	0.074	0.113	0.235	0.16	0.069	0.074	0.09	0.092	0.088	0.112	0.076	0.076	0.087	0.131	0.104	0.03	0.024	0.059	0.054	0.071	0.065	0.063	0.057	0.099	0.31	0.168
2826	Form_3478	CDCA3	LOC108696067	gnl|gene36869|XL-9_2-gene36869|rna77389|	283;284	33.2	PRKALLSSSSGRS;RKALLSSSSGRSP	K.ALLSSSSGR.S	Cell division cycle-associated protein 3						0.014	0.009	0.073	0.074	0.142	0.095	0.147	0.173	0.265	0.001	0.007	0.069	0.074	0.09	0.092	0.088	0.112	0.076	0.076	0.087	0.131	0.104	0.011	0.008	0.076	0.079	0.145	0.123	0.129	0.152	0.267	0.001	0.008
2826	Form_3479	CDCA3	LOC108696067	gnl|gene36869|XL-9_2-gene36869|rna77389|	289	14.7	SSSSGRSPLRILQ	K.ALLSSSSGRSPLR.I	Cell division cycle-associated protein 3						0.023	0.057	0.071	0.072	0.104	0.084	0.141	0.17	0.158	0.049	0.072	0.069	0.074	0.09	0.092	0.088	0.112	0.076	0.076	0.087	0.131	0.104	0.018	0.048	0.072	0.075	0.103	0.106	0.121	0.146	0.155	0.072	0.084
2826	Form_3480	CDCA3	LOC108696067	gnl|gene36869|XL-9_2-gene36869|rna77389|	286	13.5	ALLSSSSGRSPLR	K.ALLSSSSGRSPLR.I	Cell division cycle-associated protein 3						0.001	0.014	0.104	0.133	0.122	0.138	0.144	0.196	0.142	0.001	0.003	0.069	0.074	0.09	0.092	0.088	0.112	0.076	0.076	0.087	0.131	0.104	0.001	0.012	0.107	0.139	0.122	0.176	0.125	0.17	0.141	0.002	0.004
2827	Form_3477	CDCA3	LOC108696067	gnl|gene36869|XL-9_2-gene36869|rna77389|	299	77.8	ILQEDNSPNTNTQ	R.ILQEDNSPNTNTQHR.Q	Cell division cycle-associated protein 3						0.009	0.011	0.115	0.096	0.12	0.102	0.146	0.156	0.182	0.025	0.037	0.069	0.074	0.09	0.092	0.088	0.112	0.076	0.076	0.087	0.131	0.104	0.007	0.009	0.117	0.1	0.119	0.129	0.125	0.134	0.179	0.037	0.044
113	Form__151	CDCA7	LOC108708645	gnl|gene10465|XL-9_2-gene10465|rna30403|	123	21.6	VAKSCSSDSEVEQ	K.SCSSDSEVEQPNDFLQR.R	Cell division cycle-associated protein 7						0.099	0.055	0.066	0.078	0.124	0.121	0.13	0.153	0.159	0.006	0.009	0.089	0.075	0.112	0.102	0.1	0.104	0.093	0.087	0.094	0.078	0.065	0.093	0.044	0.078	0.084	0.131	0.133	0.128	0.141	0.158	0.005	0.006
114	Form__150	CDCA7	LOC108708645	gnl|gene10465|XL-9_2-gene10465|rna30403|	211	34	GGVEPTSPDRDRR	R.SMGGVEPTSPDRDR.R	Cell division cycle-associated protein 7						0.105	0.069	0.075	0.08	0.09	0.103	0.121	0.145	0.14	0.014	0.057	0.089	0.075	0.112	0.102	0.1	0.104	0.093	0.087	0.094	0.078	0.065	0.101	0.056	0.091	0.088	0.097	0.116	0.121	0.136	0.142	0.012	0.04
2216	Form_2718	CDCA8	cdca9.S	gnl|gene2292|XL-9_2-gene2292|rna6675|	112	141	AVKLDCSVDELSE	K.LDCSVDELSEPK.L	Borealin						0.029	0.029	0.145	0.112	0.137	0.153	0.145	0.125	0.119	0	0.004	0.098	0.075	0.081	0.082	0.091	0.09	0.09	0.102	0.107	0.097	0.086	0.031	0.024	0.129	0.101	0.137	0.151	0.143	0.14	0.14	0	0.004
2217	Form_2719	CDCA8	cdca9.S	gnl|gene2292|XL-9_2-gene2292|rna6675|	199	24.7	KLLVTNSSSKPAQ	K.LLVTNSSSK.P	Borealin						0.002	0.016	0.249	0.1	0.091	0.122	0.149	0.138	0.126	0.001	0.006	0.098	0.075	0.081	0.082	0.091	0.09	0.09	0.102	0.107	0.097	0.086	0.002	0.013	0.223	0.091	0.091	0.121	0.148	0.156	0.149	0.001	0.006
3843	Form_4725	CDK11B	cdk11b.S	gnl|gene46808|XL-9_2-gene46808|rna91732|	47	5000	RDSKRDSLEEGEL	K.RDSLEEGELR.D	Cyclin-dependent kinase 11B						0.111	0.07	0.118	0.12	0.115	0.12	0.107	0.109	0.117	0.005	0.008	0.098	0.09	0.092	0.086	0.096	0.093	0.092	0.094	0.096	0.082	0.08	0.117	0.068	0.117	0.111	0.119	0.12	0.106	0.11	0.121	0.004	0.007
3844	Form_4726	CDK11B	cdk11b.S	gnl|gene46808|XL-9_2-gene46808|rna91732|	318	19.8	SDLQDVSDSERKT	R.LDMETMLSDLQDVSDSERK.T	Cyclin-dependent kinase 11B	GN:CDK11B|CDK11B|human|P21127	0	283	SDLQDISDSERKT	1	0.035	0.036	0.08	0.103	0.1	0.099	0.158	0.19	0.171	0.006	0.023	0.098	0.09	0.092	0.086	0.096	0.093	0.092	0.094	0.096	0.082	0.08	0.037	0.035	0.079	0.095	0.103	0.099	0.157	0.192	0.177	0.005	0.02
3109	Form_3818	CDK13	LOC108700780	gnl|gene39966|XL-9_2-gene39966|rna81766|	329;331;333	5000	PFVSRRSLSRSPV;VSRRSLSRSPVPR;RRSLSRSPVPRKS	R.RSLSRSPVPR.K	CDC2L5 protein	GN:CDK12|CDK12|human|Q9NYV4	0;0	341;343	PFLSKRSLSRSPL;LSKRSLSRSPLPS	NaN;NaN	0.125	0.023	0.117	0.132	0.136	0.106	0.115	0.101	0.135	0.003	0.008	0.094	0.081	0.11	0.093	0.101	0.114	0.095	0.082	0.085	0.076	0.068	0.122	0.019	0.134	0.128	0.143	0.126	0.114	0.086	0.12	0.002	0.006
3110	Form_3819	CDK13	LOC108700780	gnl|gene39966|XL-9_2-gene39966|rna81766|	1053	27.6	KAPRKESVSVPSV	R.KESVSVPSVDATK.N	CDC2L5 protein						0.025	0.03	0.16	0.117	0.149	0.092	0.137	0.119	0.156	0.006	0.01	0.094	0.081	0.11	0.093	0.101	0.114	0.095	0.082	0.085	0.076	0.068	0.024	0.025	0.183	0.113	0.157	0.109	0.136	0.102	0.138	0.005	0.007
3111	Form_3817	CDK13	LOC108700780	gnl|gene39966|XL-9_2-gene39966|rna81766|	1066	27.5	DATKNSSPAPLQP	K.NSSPAPLQPVK.A	CDC2L5 protein						0.083	0.118	0.098	0.166	0.09	0.123	0.073	0.115	0.059	0.023	0.052	0.094	0.081	0.11	0.093	0.101	0.114	0.095	0.082	0.085	0.076	0.068	0.084	0.102	0.116	0.165	0.097	0.15	0.074	0.101	0.054	0.019	0.038
4427	Form_5432	CDT1	cdt1.L	gnl|gene5931|XL-9_2-gene5931|rna17363|	130;133	32.4	VALEHVTPSSLGK;EHVTPSSLGKKIK	K.VALEHVTPSSLGK.K	DNA replication factor Cdt1						0.002	0.002	0.084	0.08	0.059	0.112	0.135	0.206	0.295	0.005	0.02	0.061	0.056	0.064	0.083	0.082	0.117	0.104	0.134	0.106	0.125	0.069	0.001	0.001	0.051	0.063	0.046	0.125	0.134	0.263	0.298	0.006	0.013
5060	Form_6191	CDV3	cdv3.S	gnl|gene8864|XL-9_2-gene8864|rna25811|	65	5000	KEKSGKSDNPDQL	K.SDNPDQLQEK.E	Protein CDV3 homolog						0.049	0.028	0.099	0.103	0.12	0.152	0.139	0.136	0.159	0.003	0.013	0.106	0.111	0.111	0.104	0.093	0.09	0.07	0.074	0.069	0.082	0.09	0.06	0.036	0.127	0.123	0.128	0.157	0.112	0.116	0.126	0.003	0.013
5061	Form_6192	CDV3	cdv3.S	gnl|gene8864|XL-9_2-gene8864|rna25811|	100	44.3	IQSLQLSNEKEDD	R.IQSLQLSNEK.E	Protein CDV3 homolog						0.098	0.055	0.097	0.09	0.106	0.112	0.141	0.14	0.149	0.004	0.006	0.106	0.111	0.111	0.104	0.093	0.09	0.07	0.074	0.069	0.082	0.09	0.118	0.07	0.123	0.107	0.112	0.115	0.112	0.118	0.117	0.004	0.006
5062	Form_6190	CDV3	cdv3.S	gnl|gene8864|XL-9_2-gene8864|rna25811|	126	37	ETGGYGTDKSSGP	K.EEQGADWEETGGYGTDK.S	Protein CDV3 homolog						0.087	0.04	0.099	0.096	0.12	0.124	0.131	0.131	0.153	0.01	0.01	0.106	0.111	0.111	0.104	0.093	0.09	0.07	0.074	0.069	0.082	0.09	0.105	0.05	0.125	0.113	0.127	0.127	0.104	0.11	0.12	0.009	0.01
5200	Form_6368	CDV3	cdv3.L	gnl|gene9651|XL-9_2-gene9651|rna28089|	67	35.6	KEKSGKSENPDQL	K.SGKSENPDQLQEK.E	Protein CDV3 homolog						0.089	0.05	0.149	0.149	0.095	0.147	0.084	0.112	0.082	0.018	0.024	0.101	0.088	0.102	0.093	0.105	0.091	0.091	0.079	0.09	0.076	0.084	0.097	0.047	0.163	0.149	0.107	0.144	0.082	0.095	0.079	0.015	0.022
5201	Form_6370	CDV3	cdv3.L	gnl|gene9651|XL-9_2-gene9651|rna28089|	124	55.2	GADWEESGGFGSD	K.EEQGADWEESGGFGSDK.S	Protein CDV3 homolog						0.075	0.042	0.099	0.112	0.092	0.126	0.126	0.164	0.157	0.001	0.007	0.101	0.088	0.102	0.093	0.105	0.091	0.091	0.079	0.09	0.076	0.084	0.082	0.04	0.11	0.113	0.105	0.124	0.124	0.141	0.153	0.001	0.006
5201	Form_6371	CDV3	cdv3.L	gnl|gene9651|XL-9_2-gene9651|rna28089|	129	35.4	ESGGFGSDKSSGP	K.EEQGADWEESGGFGSDK.S	Protein CDV3 homolog						0.081	0.047	0.077	0.085	0.082	0.123	0.115	0.174	0.2	0.006	0.012	0.101	0.088	0.102	0.093	0.105	0.091	0.091	0.079	0.09	0.076	0.084	0.089	0.045	0.086	0.086	0.094	0.122	0.114	0.15	0.197	0.005	0.011
5202	Form_6372	CDV3	cdv3.L	gnl|gene9651|XL-9_2-gene9651|rna28089|	147	51.3	QAQAPISAVEEAP	K.TAQAQAPISAVEEAPEPVHTGGVYRPPGAR.A	Protein CDV3 homolog						0.026	0.038	0.127	0.176	0.119	0.158	0.115	0.114	0.091	0.013	0.023	0.101	0.088	0.102	0.093	0.105	0.091	0.091	0.079	0.09	0.076	0.084	0.028	0.036	0.14	0.176	0.135	0.155	0.113	0.097	0.088	0.011	0.021
5203	Form_6369	CDV3	cdv3.L	gnl|gene9651|XL-9_2-gene9651|rna28089|	190	32.8	SDTQFPSLQATAK	R.KPQGPPEIYSDTQFPSLQATAK.H	Protein CDV3 homolog	GN:CDV3|CDV-3|human|Q9UKY7	0	197	SDTQFPSLQSTAK	NaN	0.061	0.057	0.07	0.089	0.093	0.109	0.106	0.152	0.139	0.048	0.075	0.101	0.088	0.102	0.093	0.105	0.091	0.091	0.079	0.09	0.076	0.084	0.068	0.055	0.079	0.091	0.108	0.11	0.107	0.133	0.138	0.04	0.07
4060	Form_4985	CDYL	LOC108719116	gnl|gene49235|XL-9_2-gene49235|rna95136|	116	24.6	NQLLHSSPKLRRS	K.NNQLLHSSPK.L	Chromodomain Y-like protein						0.102	0.1	0.136	0.112	0.112	0.125	0.095	0.096	0.116	0.003	0.004	0.074	0.055	0.072	0.083	0.094	0.087	0.104	0.1	0.089	0.107	0.134	0.09	0.065	0.116	0.11	0.125	0.129	0.117	0.114	0.123	0.004	0.006
2853	Form_3514	CEBPZ	cebpz.S	gnl|gene3730|XL-9_2-gene3730|rna10863|	8	16.7	DAIKSESFSGGQN	K.SESFSGGQNK.S	CCAAT/enhancer-binding protein zeta						0.016	0.014	0.088	0.098	0.109	0.142	0.133	0.186	0.16	0.02	0.034	0.112	0.086	0.121	0.109	0.11	0.093	0.084	0.071	0.085	0.063	0.066	0.02	0.013	0.117	0.117	0.132	0.145	0.123	0.145	0.149	0.014	0.025
2989	Form_3673	CEBPZ	cebpz.L	gnl|gene38720|XL-9_2-gene38720|rna79994|	834;839	5000	RKKIKRSEDEESL;RSEDEESLEDVDD	K.IKRSEDEESLEDVDDEEFDK.I	CCAAT/enhancer-binding protein zeta						0.055	0.017	0.084	0.083	0.15	0.118	0.156	0.124	0.201	0.005	0.007	0.097	0.08	0.093	0.084	0.1	0.087	0.094	0.089	0.091	0.088	0.098	0.058	0.015	0.085	0.076	0.163	0.112	0.16	0.12	0.199	0.005	0.008
931	Form_1141	CECR2	cecr2.S	gnl|gene14372|XL-9_2-gene14372|rna41853|	199	124.7	PPKKKKSAEEPVV	K.SAEEPVVSEK.T	Cat eye syndrome critical region protein 2						0.026	0.016	0.071	0.069	0.101	0.124	0.134	0.199	0.231	0.012	0.017	0.076	0.083	0.084	0.1	0.105	0.107	0.103	0.088	0.086	0.094	0.076	0.021	0.014	0.064	0.074	0.113	0.142	0.148	0.187	0.212	0.012	0.014
932	Form_1140	CECR2	cecr2.S	gnl|gene14372|XL-9_2-gene14372|rna41853|	213	140.8	EKTDPKSPVLDEI	K.TDPKSPVLDEISGEK.K	Cat eye syndrome critical region protein 2						0.072	0.037	0.092	0.068	0.097	0.096	0.108	0.121	0.169	0.051	0.089	0.076	0.083	0.084	0.1	0.105	0.107	0.103	0.088	0.086	0.094	0.076	0.06	0.034	0.085	0.074	0.111	0.112	0.122	0.117	0.159	0.052	0.074
1427	Form_1755	CENPC	cenpc.L	gnl|gene16790|XL-9_2-gene16790|rna49058|	705	41.8	HDNNALSDEPHLK	K.SACVDGPSELDEHDNNALSDEPHLK.K	Centromere protein C						0.074	0.045	0.083	0.128	0.127	0.122	0.095	0.134	0.18	0.002	0.012	0.088	0.079	0.097	0.086	0.11	0.109	0.11	0.093	0.085	0.078	0.066	0.068	0.037	0.084	0.115	0.146	0.139	0.109	0.131	0.16	0.002	0.008
1428	Form_1756	CENPC	cenpc.L	gnl|gene16790|XL-9_2-gene16790|rna49058|	1129	105.1	QLLSSDSEGNNKP	K.NTPQLLSSDSEGNNKPEPR.S	Centromere protein C						0.046	0.028	0.056	0.069	0.118	0.102	0.125	0.158	0.266	0.012	0.02	0.088	0.079	0.097	0.086	0.11	0.109	0.11	0.093	0.085	0.078	0.066	0.043	0.023	0.057	0.063	0.137	0.117	0.145	0.155	0.238	0.01	0.014
1428	Form_1757	CENPC	cenpc.L	gnl|gene16790|XL-9_2-gene16790|rna49058|	1126;1127;1129	105.1	NTPQLLSSDSEGN;TPQLLSSDSEGNN;QLLSSDSEGNNKP	K.NTPQLLSSDSEGNNKPEPR.S	Centromere protein C						0.155	0.048	0.079	0.101	0.136	0.116	0.099	0.102	0.148	0.004	0.012	0.088	0.079	0.097	0.086	0.11	0.109	0.11	0.093	0.085	0.078	0.066	0.143	0.04	0.08	0.091	0.157	0.133	0.114	0.099	0.132	0.003	0.008
3446	Form_4246	CENPE	LOC108710758	gnl|gene42936|XL-9_2-gene42936|rna86107|	1299	17.7	CVGDISSPNHDAT	R.QQLVDCVGDISSPNHDATAEQEK.M	Centromere-associated protein E						0.045	0.035	0.084	0.081	0.118	0.128	0.119	0.152	0.174	0.033	0.032	0.077	0.078	0.085	0.096	0.098	0.099	0.092	0.093	0.095	0.094	0.092	0.037	0.029	0.077	0.084	0.124	0.136	0.118	0.152	0.178	0.033	0.032
3447	Form_4245	CENPE	LOC108710758	gnl|gene42936|XL-9_2-gene42936|rna86107|	1834	19.4	TAVQADSSEGSND	R.NTNISEENLETAVQADSSEGSNDQHSVEQDR.S	Centromere-associated protein E						0.1	0.039	0.093	0.097	0.123	0.124	0.127	0.131	0.146	0.007	0.013	0.077	0.078	0.085	0.096	0.098	0.099	0.092	0.093	0.095	0.094	0.092	0.084	0.033	0.086	0.101	0.131	0.134	0.127	0.133	0.151	0.007	0.013
3448	Form_4244	CENPE	LOC108710758	gnl|gene42936|XL-9_2-gene42936|rna86107|	2747	47.2	QHGRKWSDSASEE	R.KWSDSASEELK.F	Centromere-associated protein E						0.012	0.013	0.038	0.065	0.089	0.157	0.144	0.239	0.226	0.008	0.009	0.077	0.078	0.085	0.096	0.098	0.099	0.092	0.093	0.095	0.094	0.092	0.01	0.011	0.034	0.066	0.093	0.165	0.141	0.236	0.228	0.008	0.009
3449	Form_4242	CENPE	LOC108710758	gnl|gene42936|XL-9_2-gene42936|rna86107|	3183	150	YSQLVMSPGKTGM	R.SEIYSQLVMSPGK.T	Centromere-associated protein E						0.094	0.078	0.091	0.1	0.103	0.119	0.112	0.127	0.137	0.013	0.026	0.077	0.078	0.085	0.096	0.098	0.099	0.092	0.093	0.095	0.094	0.092	0.079	0.067	0.085	0.105	0.111	0.129	0.113	0.13	0.143	0.013	0.026
3449	Form_4243	CENPE	LOC108710758	gnl|gene42936|XL-9_2-gene42936|rna86107|	3170	21.9	STKRVVSPNRSEI	K.RVVSPNRSEIYSQLVMSPGK.T	Centromere-associated protein E						0.06	0.063	0.062	0.08	0.095	0.1	0.146	0.174	0.165	0.025	0.031	0.077	0.078	0.085	0.096	0.098	0.099	0.092	0.093	0.095	0.094	0.092	0.05	0.053	0.057	0.083	0.101	0.108	0.146	0.176	0.17	0.026	0.031
1480	Form_1816	CENPT	cenpt.L	gnl|gene1706|XL-9_2-gene1706|rna4967|	415	45.2	QKQNLKSDSQLEG	K.SDSQLEGEFK.D	Centromere protein T						0.004	0.004	0.089	0.137	0.181	0.182	0.151	0.132	0.112	0.005	0.004	0.1	0.102	0.104	0.104	0.095	0.099	0.08	0.085	0.077	0.08	0.076	0.004	0.004	0.1	0.155	0.187	0.195	0.131	0.122	0.094	0.004	0.003
1481	Form_1815	CENPT	cenpt.L	gnl|gene1706|XL-9_2-gene1706|rna4967|	515	83.2	ATPVFKSPEIEQK	K.SPEIEQKPPEASR.K	Centromere protein T						0.022	0.018	0.14	0.165	0.161	0.151	0.11	0.12	0.098	0.001	0.012	0.1	0.102	0.104	0.104	0.095	0.099	0.08	0.085	0.077	0.08	0.076	0.024	0.02	0.156	0.183	0.163	0.16	0.094	0.109	0.081	0.001	0.01
261	Form__346	CENPU	cenpu.L	gnl|gene11170|XL-9_2-gene11170|rna32462|	238	114.6	VEDNSETPGQTKK	K.GEVEVEDNSETPGQTK.K	Centromere protein U						0.008	0.008	0.125	0.104	0.101	0.125	0.141	0.132	0.14	0.057	0.059	0.1	0.092	0.113	0.104	0.107	0.089	0.08	0.08	0.078	0.074	0.082	0.009	0.008	0.156	0.12	0.12	0.123	0.125	0.117	0.121	0.047	0.054
2749	Form_3379	CEP162	LOC108716877	gnl|gene35949|XL-9_2-gene35949|rna76085|	26	73.9	ESLSDDSFDGSKR	K.ESLSDDSFDGSK.R	Centrosomal protein of 162 kDa						0.017	0.028	0.175	0.147	0.118	0.136	0.116	0.131	0.114	0.009	0.009	0.087	0.08	0.108	0.104	0.112	0.108	0.091	0.082	0.088	0.068	0.073	0.015	0.023	0.192	0.155	0.134	0.149	0.107	0.109	0.102	0.006	0.007
1891	Form_2324	CEP192	cep192.L	gnl|gene19107|XL-9_2-gene19107|rna55791|	284	37.1	MDSAPASDDEDVE	R.LAATGMDSAPASDDEDVEHELEK.A	Centrosomal protein of 192 kDa (Fragment)						0.112	0.044	0.073	0.099	0.067	0.109	0.121	0.222	0.135	0.008	0.011	0.075	0.082	0.082	0.083	0.091	0.094	0.099	0.111	0.104	0.09	0.088	0.089	0.038	0.063	0.087	0.064	0.108	0.126	0.26	0.148	0.008	0.01
1892	Form_2323	CEP192	cep192.L	gnl|gene19107|XL-9_2-gene19107|rna55791|	991	19.6	IGLIKTSPMSASN	K.TSPMSASNQNSFR.T	Centrosomal protein of 192 kDa (Fragment)						0.055	0.048	0.178	0.178	0.133	0.136	0.083	0.07	0.051	0.018	0.048	0.075	0.082	0.082	0.083	0.091	0.094	0.099	0.111	0.104	0.09	0.088	0.046	0.044	0.163	0.165	0.135	0.143	0.092	0.087	0.059	0.018	0.047
1893	Form_2329	CEP192	cep192.L	gnl|gene19107|XL-9_2-gene19107|rna55791|	1227	17.7	TTIVRSSPTPLEM	R.SSPTPLEMQNNIQK.D	Centrosomal protein of 192 kDa (Fragment)						0.049	0.025	0.093	0.126	0.082	0.126	0.138	0.161	0.119	0.023	0.057	0.075	0.082	0.082	0.083	0.091	0.094	0.099	0.111	0.104	0.09	0.088	0.039	0.022	0.081	0.111	0.079	0.126	0.145	0.19	0.131	0.022	0.053
1894	Form_2326	CEP192	cep192.L	gnl|gene19107|XL-9_2-gene19107|rna55791|	1255	5000	CKALGESPQKQKN	K.ALGESPQK.Q	Centrosomal protein of 192 kDa (Fragment)						0.097	0.058	0.193	0.095	0.149	0.078	0.131	0.067	0.125	0.002	0.006	0.075	0.082	0.082	0.083	0.091	0.094	0.099	0.111	0.104	0.09	0.088	0.08	0.052	0.174	0.087	0.149	0.081	0.143	0.082	0.143	0.002	0.006
1895	Form_2325	CEP192	cep192.L	gnl|gene19107|XL-9_2-gene19107|rna55791|	2357;2362	5000	KPRGLLSPHPDTP;LSPHPDTPVHIAK	R.GLLSPHPDTPVHIAK.P	Centrosomal protein of 192 kDa (Fragment)						0.012	0.014	0.252	0.157	0.104	0.091	0.1	0.068	0.089	0.023	0.091	0.075	0.082	0.082	0.083	0.091	0.094	0.099	0.111	0.104	0.09	0.088	0.01	0.013	0.228	0.144	0.105	0.094	0.109	0.083	0.102	0.023	0.088
1895	Form_2327	CEP192	cep192.L	gnl|gene19107|XL-9_2-gene19107|rna55791|	2357	5000	KPRGLLSPHPDTP	R.GLLSPHPDTPVHIAK.P	Centrosomal protein of 192 kDa (Fragment)						0.006	0.016	0.103	0.122	0.139	0.13	0.113	0.105	0.108	0.068	0.089	0.075	0.082	0.082	0.083	0.091	0.094	0.099	0.111	0.104	0.09	0.088	0.005	0.014	0.091	0.109	0.136	0.131	0.12	0.125	0.12	0.066	0.084
1896	Form_2328	CEP192	cep192.L	gnl|gene19107|XL-9_2-gene19107|rna55791|	2524	60.7	VKPRRRSGSEASS	R.SGSEASSLK.A	Centrosomal protein of 192 kDa (Fragment)						0.031	0.06	0.127	0.142	0.127	0.174	0.099	0.13	0.101	0.003	0.005	0.075	0.082	0.082	0.083	0.091	0.094	0.099	0.111	0.104	0.09	0.088	0.025	0.053	0.112	0.127	0.125	0.176	0.106	0.156	0.113	0.003	0.005
1796	Form_2210	CEP350	cep350.L	gnl|gene18599|XL-9_2-gene18599|rna54298|	791	66.3	IWKKPDSPPERDG	K.KPDSPPERDGGDDIFSAR.I	Centrosome-associated protein 350						0.091	0.064	0.072	0.112	0.113	0.113	0.122	0.131	0.115	0.026	0.041	0.09	0.091	0.12	0.097	0.1	0.103	0.08	0.079	0.09	0.078	0.072	0.089	0.063	0.094	0.118	0.123	0.127	0.106	0.113	0.113	0.022	0.032
1797	Form_2211	CEP350	cep350.L	gnl|gene18599|XL-9_2-gene18599|rna54298|	1107	35.7	SKHTPLSPGREPS	K.HTPLSPGREPSAGNGTDTDSTIGDLSSR.S	Centrosome-associated protein 350						0.09	0.063	0.075	0.097	0.098	0.105	0.122	0.129	0.118	0.046	0.057	0.09	0.091	0.12	0.097	0.1	0.103	0.08	0.079	0.09	0.078	0.072	0.089	0.063	0.099	0.103	0.107	0.119	0.107	0.112	0.116	0.039	0.045
1599	Form_1968	CEP41	cep41.S	gnl|gene17642|XL-9_2-gene17642|rna51550|	6	54.4	xMSAKRSIGDSEI	K.RSIGDSEILK.K	Centrosomal protein of 41 kDa						0.023	0.024	0.129	0.132	0.137	0.13	0.128	0.139	0.147	0.002	0.009	0.085	0.085	0.093	0.095	0.096	0.106	0.092	0.092	0.084	0.085	0.085	0.021	0.022	0.128	0.134	0.141	0.148	0.126	0.137	0.132	0.002	0.008
1600	Form_1969	CEP41	cep41.S	gnl|gene17642|XL-9_2-gene17642|rna51550|	115;122	94.1	RPNGKGSPANESN;PANESNSPIQFID	K.GSPANESNSPIQFIDSER.G	Centrosomal protein of 41 kDa						0.016	0.011	0.041	0.073	0.09	0.128	0.121	0.201	0.271	0.024	0.024	0.085	0.085	0.093	0.095	0.096	0.106	0.092	0.092	0.084	0.085	0.085	0.015	0.01	0.042	0.076	0.094	0.148	0.121	0.201	0.248	0.022	0.022
1600	Form_1970	CEP41	cep41.S	gnl|gene17642|XL-9_2-gene17642|rna51550|	115	94.1	RPNGKGSPANESN	K.GSPANESNSPIQFIDSERGEELIQTSR.S	Centrosomal protein of 41 kDa						0.046	0.026	0.053	0.077	0.112	0.091	0.171	0.175	0.187	0.024	0.039	0.085	0.085	0.093	0.095	0.096	0.106	0.092	0.092	0.084	0.085	0.085	0.043	0.024	0.054	0.08	0.117	0.105	0.171	0.175	0.171	0.022	0.036
3001	Form_3687	CEP43	fgfr1op.L	gnl|gene3888|XL-9_2-gene3888|rna11343|	336	66.3	DYLEGDSFFDDPI	K.TELEEDYLEGDSFFDDPIPKPEK.M	Centrosomal protein 43						0.06	0.024	0.117	0.068	0.07	0.087	0.175	0.133	0.234	0.005	0.026	0.091	0.098	0.101	0.094	0.098	0.099	0.086	0.095	0.086	0.076	0.077	0.059	0.026	0.129	0.07	0.075	0.094	0.164	0.138	0.219	0.004	0.022
1245	Form_1544	CEP97	cep97.L	gnl|gene15976|XL-9_2-gene15976|rna46700|	315	40	GYLTSSTPNKRLP	R.SDGYLTSSTPNK.R	Centrosomal protein of 97 kDa						0.054	0.047	0.227	0.157	0.102	0.108	0.085	0.075	0.081	0.025	0.038	0.096	0.101	0.099	0.096	0.088	0.099	0.096	0.091	0.085	0.071	0.077	0.055	0.051	0.24	0.161	0.096	0.114	0.087	0.073	0.073	0.019	0.031
1246	Form_1543	CEP97	cep97.L	gnl|gene15976|XL-9_2-gene15976|rna46700|	442	92.3	ELPPSETPEKPKL	K.DHTELPPSETPEK.P	Centrosomal protein of 97 kDa						0.021	0.026	0.138	0.131	0.135	0.114	0.096	0.106	0.115	0.064	0.054	0.096	0.101	0.099	0.096	0.088	0.099	0.096	0.091	0.085	0.071	0.077	0.022	0.029	0.149	0.137	0.13	0.123	0.101	0.105	0.107	0.05	0.045
1247	Form_1545	CEP97	cep97.L	gnl|gene15976|XL-9_2-gene15976|rna46700|	621	19.3	LPSASNSKHANPA	K.LQTANSSENDLPSASNSK.H	Centrosomal protein of 97 kDa						0.03	0.012	0.144	0.122	0.168	0.119	0.138	0.102	0.139	0.017	0.008	0.096	0.101	0.099	0.096	0.088	0.099	0.096	0.091	0.085	0.071	0.077	0.031	0.013	0.153	0.126	0.159	0.127	0.143	0.1	0.127	0.013	0.007
1247	Form_1550	CEP97	cep97.L	gnl|gene15976|XL-9_2-gene15976|rna46700|	611	20.2	LQTANSSENDLPS	K.LQTANSSENDLPSASNSK.H	Centrosomal protein of 97 kDa						0.05	0.035	0.081	0.099	0.148	0.159	0.122	0.124	0.148	0.013	0.022	0.096	0.101	0.099	0.096	0.088	0.099	0.096	0.091	0.085	0.071	0.077	0.052	0.038	0.086	0.102	0.14	0.17	0.126	0.122	0.136	0.01	0.018
1248	Form_1542	CEP97	cep97.L	gnl|gene15976|XL-9_2-gene15976|rna46700|	633;634	5000	ALEELPSSPEKLN;LEELPSSPEKLNR	K.HANPALEELPSSPEK.L	Centrosomal protein of 97 kDa						0.01	0.004	0.046	0.078	0.152	0.155	0.131	0.165	0.245	0.005	0.01	0.096	0.101	0.099	0.096	0.088	0.099	0.096	0.091	0.085	0.071	0.077	0.01	0.004	0.05	0.082	0.146	0.168	0.137	0.164	0.227	0.004	0.008
1248	Form_1547	CEP97	cep97.L	gnl|gene15976|XL-9_2-gene15976|rna46700|	634	5000	LEELPSSPEKLNR	K.HANPALEELPSSPEK.L	Centrosomal protein of 97 kDa						0.12	0.08	0.122	0.127	0.149	0.104	0.086	0.094	0.106	0.003	0.007	0.096	0.101	0.099	0.096	0.088	0.099	0.096	0.091	0.085	0.071	0.077	0.123	0.086	0.129	0.13	0.14	0.11	0.088	0.091	0.096	0.002	0.006
1249	Form_1549	CEP97	cep97.L	gnl|gene15976|XL-9_2-gene15976|rna46700|	668	31.8	GNTEKNSSEESEY	K.NSSEESEYSQPSLDTVR.H	Centrosomal protein of 97 kDa						0.029	0.014	0.066	0.08	0.155	0.149	0.128	0.152	0.207	0.008	0.013	0.096	0.101	0.099	0.096	0.088	0.099	0.096	0.091	0.085	0.071	0.077	0.03	0.015	0.071	0.084	0.148	0.161	0.134	0.15	0.191	0.006	0.011
1250	Form_1548	CEP97	cep97.L	gnl|gene15976|XL-9_2-gene15976|rna46700|	699	38.6	PADQDLTREEQSQ	K.VPDSPADQDLTREEQSQSSK.D	Centrosomal protein of 97 kDa						0.003	0.001	0.004	0.005	0.004	0.005	0.005	0.01	0.006	0.476	0.48	0.096	0.101	0.099	0.096	0.088	0.099	0.096	0.091	0.085	0.071	0.077	0.004	0.002	0.005	0.006	0.005	0.006	0.007	0.012	0.007	0.451	0.493
1251	Form_1546	CEP97	cep97.L	gnl|gene15976|XL-9_2-gene15976|rna46700|	738	17	ETADNTSYSERTE	R.SVEQLDETADNTSYSER.T	Centrosomal protein of 97 kDa						0.025	0.048	0.27	0.153	0.136	0.092	0.074	0.074	0.118	0.003	0.009	0.096	0.101	0.099	0.096	0.088	0.099	0.096	0.091	0.085	0.071	0.077	0.025	0.051	0.284	0.156	0.127	0.097	0.075	0.071	0.106	0.002	0.007
2121	Form_2597	CERT1	col4a3bp.S	gnl|gene20247|XL-9_2-gene20247|rna59111|	126	46.5	GYGSESSLRRHGS	K.SESGYGSESSLRR.H	Ceramide transfer protein	GN:COL4A3BP|COL4A3BP|human|Q9Y5P4	0	126	GYGSESSLRRHGS	NaN	0.044	0.022	0.131	0.134	0.104	0.128	0.118	0.164	0.12	0.011	0.024	0.09	0.092	0.085	0.111	0.099	0.104	0.084	0.092	0.089	0.082	0.072	0.042	0.022	0.118	0.158	0.11	0.142	0.105	0.16	0.114	0.01	0.018
2122	Form_2598	CERT1	col4a3bp.S	gnl|gene20247|XL-9_2-gene20247|rna59111|	232	5000	KLFQHVTPKGING	K.LFQHVTPK.G	Ceramide transfer protein	GN:COL4A3BP|COL4A3BP|human|Q9Y5P4	0	232	KLFPHVTPKGING	NaN	0.004	0.003	0.12	0.089	0.108	0.096	0.12	0.123	0.197	0.061	0.078	0.09	0.092	0.085	0.111	0.099	0.104	0.084	0.092	0.089	0.082	0.072	0.004	0.003	0.112	0.109	0.117	0.11	0.111	0.124	0.192	0.055	0.062
1952	Form_2391	CFAP410	c21orf2.S	gnl|gene1937|XL-9_2-gene1937|rna5638|	177	71.9	NDLLNFSMEETNK	R.ESENDLLNFSMEETNK.I	Cilia- and flagella-associated protein 410						0.04	0.022	0.078	0.094	0.112	0.085	0.188	0.187	0.177	0.005	0.01	0.107	0.083	0.09	0.092	0.091	0.109	0.082	0.092	0.085	0.088	0.081	0.048	0.02	0.078	0.096	0.113	0.103	0.171	0.191	0.167	0.005	0.009
1953	Form_2392	CFAP410	c21orf2.S	gnl|gene1937|XL-9_2-gene1937|rna5638|	203	14.7	KFSSFSSPTDGEG	K.FSSFSSPTDGEGGR.K	Cilia- and flagella-associated protein 410						0.014	0.012	0.111	0.118	0.135	0.11	0.139	0.129	0.158	0.031	0.044	0.107	0.083	0.09	0.092	0.091	0.109	0.082	0.092	0.085	0.088	0.081	0.016	0.011	0.11	0.12	0.136	0.132	0.126	0.131	0.148	0.03	0.039
1429	Form_1759	CFDP1	cfdp1.L	gnl|gene16797|XL-9_2-gene16797|rna49077|	75;82	93.4	GVLVLGSQEVGEN;QEVGENSESQDTA	K.GVLVLGSQEVGENSESQDTATGEK.E	Craniofacial development protein 1						0.239	0.162	0.187	0.126	0.048	0.056	0.04	0.065	0.049	0.008	0.021	0.089	0.09	0.1	0.095	0.099	0.101	0.086	0.085	0.089	0.085	0.081	0.23	0.158	0.202	0.129	0.051	0.061	0.037	0.06	0.047	0.007	0.018
1430	Form_1758	CFDP1	cfdp1.L	gnl|gene16797|XL-9_2-gene16797|rna49077|	205	60.3	KSQQEPSPVSSKT	K.SQQEPSPVSSK.T	Craniofacial development protein 1						0.022	0.024	0.167	0.182	0.096	0.124	0.102	0.117	0.067	0.034	0.065	0.089	0.09	0.1	0.095	0.099	0.101	0.086	0.085	0.089	0.085	0.081	0.021	0.023	0.179	0.186	0.102	0.135	0.094	0.107	0.064	0.031	0.057
1168	Form_1448	CFL1	cfl1.S	gnl|gene15554|XL-9_2-gene15554|rna45423|	25	5000	KVRHQLSPEEAKK	R.HQLSPEEAK.K	Cofilin-1						0.014	0.01	0.074	0.122	0.1	0.14	0.085	0.127	0.129	0.109	0.091	0.075	0.091	0.068	0.074	0.081	0.08	0.101	0.116	0.101	0.11	0.103	0.011	0.01	0.054	0.097	0.087	0.12	0.092	0.158	0.14	0.129	0.101
913	Form_1122	CGN	cgn.L	gnl|gene14298|XL-9_2-gene14298|rna41651|	88	36.7	LNASNTSPPNYQN	K.SQEPYLNASNTSPPNYQNYSSK.P	Cingulin						0.081	0.04	0.106	0.087	0.128	0.107	0.108	0.107	0.122	0.037	0.076	0.084	0.095	0.095	0.1	0.098	0.104	0.087	0.094	0.09	0.08	0.074	0.074	0.041	0.109	0.094	0.136	0.12	0.102	0.109	0.119	0.032	0.061
914	Form_1121	CGN	cgn.L	gnl|gene14298|XL-9_2-gene14298|rna41651|	108	17.7	PSRSISSESELPE	R.SISSESELPENPYGSR.G	Cingulin						0.068	0.028	0.132	0.117	0.137	0.123	0.137	0.113	0.128	0.005	0.013	0.084	0.095	0.095	0.1	0.098	0.104	0.087	0.094	0.09	0.08	0.074	0.061	0.028	0.133	0.124	0.143	0.136	0.127	0.113	0.122	0.004	0.01
914	Form_1123	CGN	cgn.L	gnl|gene14298|XL-9_2-gene14298|rna41651|	105	44.8	PRGPSRSISSESE	R.SISSESELPENPYGSR.G	Cingulin						0.037	0.029	0.076	0.104	0.124	0.15	0.106	0.168	0.179	0.009	0.018	0.084	0.095	0.095	0.1	0.098	0.104	0.087	0.094	0.09	0.08	0.074	0.033	0.029	0.077	0.11	0.129	0.165	0.098	0.167	0.171	0.008	0.014
915	Form_1120	CGN	cgn.L	gnl|gene14298|XL-9_2-gene14298|rna41651|	255	127.6	SSPSNQSNEDIDT	K.NGLSTSSPSNQSNEDIDTK.P	Cingulin						0.136	0.056	0.157	0.115	0.135	0.12	0.093	0.085	0.083	0.008	0.011	0.084	0.095	0.095	0.1	0.098	0.104	0.087	0.094	0.09	0.08	0.074	0.122	0.057	0.159	0.123	0.141	0.133	0.086	0.085	0.08	0.007	0.009
1025	Form_1269	CGNL1	cgnl1.S	gnl|gene14679|XL-9_2-gene14679|rna42781|	218;222	67	LSTDNKSLLSSPG;NKSLLSSPGEKST	K.SLLSSPGEK.S	Cingulin-like protein 1						0.011	0.013	0.215	0.216	0.149	0.13	0.1	0.089	0.071	0.003	0.003	0.073	0.077	0.102	0.101	0.103	0.125	0.09	0.094	0.096	0.074	0.066	0.008	0.01	0.215	0.214	0.151	0.16	0.088	0.082	0.067	0.002	0.002
2143	Form_2625	CGNL1	cgnl1.L	gnl|gene20395|XL-9_2-gene20395|rna59575|	237	42.4	FSSSNGSPSSNRS	K.SILSSPGDTSTSESFSSSNGSPSSNR.S	Cingulin-like protein 1						0.113	0.122	0.117	0.097	0.116	0.102	0.116	0.094	0.073	0.026	0.024	0.082	0.073	0.101	0.094	0.101	0.106	0.094	0.099	0.095	0.083	0.073	0.1	0.096	0.128	0.098	0.127	0.117	0.118	0.1	0.075	0.023	0.019
2144	Form_2624	CGNL1	cgnl1.L	gnl|gene20395|XL-9_2-gene20395|rna59575|	264	87.5	QFRRQNSAGAIEG	R.QNSAGAIEGSR.S	Cingulin-like protein 1						0.091	0.07	0.123	0.115	0.128	0.123	0.109	0.099	0.115	0.009	0.018	0.082	0.073	0.101	0.094	0.101	0.106	0.094	0.099	0.095	0.083	0.073	0.079	0.054	0.131	0.114	0.136	0.138	0.108	0.103	0.115	0.008	0.014
2603	Form_3205	CHAF1A	LOC398222	gnl|gene34725|XL-9_2-gene34725|rna74392|	193	47.2	TSASNFSPERVVK	K.SDQLHQAAATSTSASNFSPER.V	Chromatin assembly factor 1 subunit A						0.085	0.061	0.103	0.115	0.117	0.119	0.102	0.128	0.125	0.018	0.026	0.099	0.102	0.096	0.088	0.091	0.092	0.091	0.091	0.091	0.078	0.081	0.091	0.068	0.108	0.11	0.116	0.119	0.101	0.127	0.124	0.015	0.023
2603	Form_3206	CHAF1A	LOC398222	gnl|gene34725|XL-9_2-gene34725|rna74392|	190	22.1	ATSTSASNFSPER	K.SDQLHQAAATSTSASNFSPER.V	Chromatin assembly factor 1 subunit A						0.078	0.062	0.097	0.113	0.122	0.116	0.102	0.129	0.118	0.028	0.036	0.099	0.102	0.096	0.088	0.091	0.092	0.091	0.091	0.091	0.078	0.081	0.084	0.069	0.101	0.108	0.121	0.116	0.101	0.128	0.117	0.024	0.032
2604	Form_3207	CHAF1A	LOC398222	gnl|gene34725|XL-9_2-gene34725|rna74392|	810	123.5	LQSLPLSGKRKSA	K.EDNGANGGSLQSLPLSGK.R	Chromatin assembly factor 1 subunit A						0.008	0.009	0.144	0.153	0.131	0.149	0.127	0.123	0.148	0.001	0.008	0.099	0.102	0.096	0.088	0.091	0.092	0.091	0.091	0.091	0.078	0.081	0.009	0.01	0.151	0.147	0.13	0.15	0.126	0.122	0.147	0.001	0.007
2605	Form_3204	CHAF1A	LOC398222	gnl|gene34725|XL-9_2-gene34725|rna74392|	878	125	KINLNDSAVLASC	K.INLNDSAVLASCQN.-	Chromatin assembly factor 1 subunit A						0.014	0.026	0.132	0.16	0.143	0.155	0.107	0.132	0.124	0.001	0.007	0.099	0.102	0.096	0.088	0.091	0.092	0.091	0.091	0.091	0.078	0.081	0.015	0.029	0.138	0.153	0.142	0.155	0.106	0.131	0.123	0.001	0.006
493	Form__624	CHAF1B	chaf1b.L	gnl|gene1224|XL-9_2-gene1224|rna3562|	417;420;425	57.6	QSKKVSSPGSRQE;KVSSPGSRQELTP;GSRQELTPSNKSM	K.VSSPGSRQELTPSNK.S	Chromatin assembly factor 1 subunit B						0.007	0.005	0.053	0.081	0.111	0.141	0.127	0.184	0.269	0.004	0.019	0.084	0.098	0.097	0.101	0.094	0.102	0.084	0.09	0.079	0.091	0.08	0.007	0.006	0.057	0.091	0.116	0.16	0.119	0.185	0.237	0.004	0.017
493	Form__625	CHAF1B	chaf1b.L	gnl|gene1224|XL-9_2-gene1224|rna3562|	425	57.6	GSRQELTPSNKSM	R.QELTPSNK.S	Chromatin assembly factor 1 subunit B						0.003	0.003	0.166	0.091	0.144	0.1	0.122	0.077	0.166	0.048	0.079	0.084	0.098	0.097	0.101	0.094	0.102	0.084	0.09	0.079	0.091	0.08	0.003	0.003	0.178	0.102	0.149	0.113	0.113	0.077	0.145	0.048	0.07
494	Form__626	CHAF1B	chaf1b.L	gnl|gene1224|XL-9_2-gene1224|rna3562|	454;464	48	SGSRECTPVSSNS;SNSLASTPNSEDK	R.ECTPVSSNSLASTPNSEDK.R	Chromatin assembly factor 1 subunit B						0.011	0.011	0.021	0.018	0.019	0.011	0.027	0.026	0.021	0.472	0.363	0.084	0.098	0.097	0.101	0.094	0.102	0.084	0.09	0.079	0.091	0.08	0.011	0.012	0.023	0.021	0.021	0.013	0.026	0.027	0.019	0.495	0.334
495	Form__627	CHAF1B	chaf1b.L	gnl|gene1224|XL-9_2-gene1224|rna3562|	501	55.2	PSPRRISLISVKT	R.RISLISVK.T	Chromatin assembly factor 1 subunit B						0.029	0.021	0.03	0.044	0.108	0.083	0.154	0.161	0.243	0.075	0.053	0.084	0.098	0.097	0.101	0.094	0.102	0.084	0.09	0.079	0.091	0.08	0.028	0.023	0.033	0.05	0.115	0.096	0.147	0.164	0.218	0.077	0.048
4279	Form_5267	CHAMP1	champ1.S	gnl|gene5158|XL-9_2-gene5158|rna15086|	173	5000	TSEDEKSVADQEQ	K.SVADQEQK.D	Chromosome alignment-maintaining phosphoprotein 1 (Fragment)						0.024	0.153	0.21	0.063	0.073	0.096	0.097	0.121	0.143	0.005	0.014	0.081	0.081	0.093	0.097	0.105	0.101	0.086	0.101	0.099	0.091	0.065	0.021	0.132	0.209	0.065	0.082	0.104	0.089	0.131	0.151	0.005	0.01
4280	Form_5257	CHAMP1	champ1.S	gnl|gene5158|XL-9_2-gene5158|rna15086|	227	158.1	EQSIAQSPEAKEK	K.SSIVEQSIAQSPEAK.E	Chromosome alignment-maintaining phosphoprotein 1 (Fragment)						0.05	0.028	0.088	0.103	0.109	0.12	0.128	0.13	0.142	0.037	0.066	0.081	0.081	0.093	0.097	0.105	0.101	0.086	0.101	0.099	0.091	0.065	0.043	0.024	0.087	0.106	0.122	0.129	0.117	0.14	0.15	0.036	0.046
4280	Form_5258	CHAMP1	champ1.S	gnl|gene5158|XL-9_2-gene5158|rna15086|	218;227	158.1	DSESKSSIVEQSI;EQSIAQSPEAKEK	K.SSIVEQSIAQSPEAK.E	Chromosome alignment-maintaining phosphoprotein 1 (Fragment)						0.119	0.054	0.106	0.113	0.119	0.129	0.112	0.107	0.13	0.005	0.007	0.081	0.081	0.093	0.097	0.105	0.101	0.086	0.101	0.099	0.091	0.065	0.102	0.046	0.104	0.116	0.132	0.138	0.102	0.114	0.136	0.005	0.005
4281	Form_5263	CHAMP1	champ1.S	gnl|gene5158|XL-9_2-gene5158|rna15086|	267	95	RDANEFSDNEATS	R.DANEFSDNEATSSHSK.D	Chromosome alignment-maintaining phosphoprotein 1 (Fragment)						0.105	0.067	0.108	0.107	0.109	0.117	0.118	0.124	0.125	0.005	0.014	0.081	0.081	0.093	0.097	0.105	0.101	0.086	0.101	0.099	0.091	0.065	0.09	0.058	0.107	0.11	0.122	0.126	0.108	0.133	0.131	0.005	0.01
4282	Form_5252	CHAMP1	champ1.S	gnl|gene5158|XL-9_2-gene5158|rna15086|	334	5000	RGIEDISEDEEMP	R.GIEDISEDEEMPVDDK.G	Chromosome alignment-maintaining phosphoprotein 1 (Fragment)						0.123	0.072	0.107	0.098	0.093	0.112	0.124	0.133	0.121	0.006	0.012	0.081	0.081	0.093	0.097	0.105	0.101	0.086	0.101	0.099	0.091	0.065	0.106	0.062	0.106	0.101	0.104	0.121	0.114	0.143	0.128	0.006	0.008
4283	Form_5259	CHAMP1	champ1.S	gnl|gene5158|XL-9_2-gene5158|rna15086|	350	176.4	KGIENVSEDEAPM	K.GIENVSEDEAPMQTK.E	Chromosome alignment-maintaining phosphoprotein 1 (Fragment)						0.101	0.092	0.1	0.123	0.092	0.142	0.102	0.135	0.1	0.004	0.009	0.081	0.081	0.093	0.097	0.105	0.101	0.086	0.101	0.099	0.091	0.065	0.087	0.079	0.099	0.127	0.103	0.152	0.093	0.145	0.105	0.004	0.006
4284	Form_5254	CHAMP1	champ1.S	gnl|gene5158|XL-9_2-gene5158|rna15086|	395	66.8	KDALEFSEDEPTS	K.DALEFSEDEPTSISK.N	Chromosome alignment-maintaining phosphoprotein 1 (Fragment)						0.142	0.085	0.109	0.101	0.099	0.109	0.11	0.109	0.122	0.005	0.01	0.081	0.081	0.093	0.097	0.105	0.101	0.086	0.101	0.099	0.091	0.065	0.123	0.074	0.109	0.105	0.111	0.118	0.101	0.118	0.129	0.005	0.007
4285	Form_5266	CHAMP1	champ1.S	gnl|gene5158|XL-9_2-gene5158|rna15086|	437	184.7	EEVANVSKNIMEF	K.NLMGFTEEEEEVANVSK.N	Chromosome alignment-maintaining phosphoprotein 1 (Fragment)						0.059	0.057	0.121	0.112	0.113	0.116	0.137	0.141	0.128	0.005	0.01	0.081	0.081	0.093	0.097	0.105	0.101	0.086	0.101	0.099	0.091	0.065	0.05	0.049	0.119	0.114	0.125	0.124	0.124	0.15	0.134	0.005	0.007
4286	Form_5253	CHAMP1	champ1.S	gnl|gene5158|XL-9_2-gene5158|rna15086|	444	84.4	KNIMEFSEEEEDT	K.NIMEFSEEEEDTPSLSK.D	Chromosome alignment-maintaining phosphoprotein 1 (Fragment)						0.121	0.076	0.12	0.106	0.106	0.12	0.117	0.107	0.105	0.006	0.014	0.081	0.081	0.093	0.097	0.105	0.101	0.086	0.101	0.099	0.091	0.065	0.105	0.066	0.119	0.11	0.119	0.13	0.108	0.116	0.111	0.006	0.01
4286	Form_5262	CHAMP1	champ1.S	gnl|gene5158|XL-9_2-gene5158|rna15086|	444;454	84.4	KNIMEFSEEEEDT;EDTPSLSKDIMEF	K.NIMEFSEEEEDTPSLSK.D	Chromosome alignment-maintaining phosphoprotein 1 (Fragment)						0.03	0.014	0.147	0.142	0.152	0.115	0.163	0.089	0.135	0.004	0.009	0.081	0.081	0.093	0.097	0.105	0.101	0.086	0.101	0.099	0.091	0.065	0.025	0.012	0.143	0.144	0.166	0.121	0.146	0.094	0.139	0.004	0.006
4286	Form_5265	CHAMP1	champ1.S	gnl|gene5158|XL-9_2-gene5158|rna15086|	444;452	84.4	KNIMEFSEEEEDT;EEEDTPSLSKDIM	K.NIMEFSEEEEDTPSLSK.D	Chromosome alignment-maintaining phosphoprotein 1 (Fragment)						0.117	0.021	0.049	0.066	0.061	0.086	0.175	0.221	0.173	0.011	0.02	0.081	0.081	0.093	0.097	0.105	0.101	0.086	0.101	0.099	0.091	0.065	0.101	0.018	0.048	0.068	0.068	0.092	0.16	0.237	0.182	0.011	0.014
4287	Form_5261	CHAMP1	champ1.S	gnl|gene5158|XL-9_2-gene5158|rna15086|	461	162.1	KDIMEFSEEEEDT	K.DIMEFSEEEEDTPAMSK.S	Chromosome alignment-maintaining phosphoprotein 1 (Fragment)						0.13	0.081	0.105	0.113	0.1	0.124	0.117	0.105	0.111	0.006	0.009	0.081	0.081	0.093	0.097	0.105	0.101	0.086	0.101	0.099	0.091	0.065	0.113	0.07	0.104	0.117	0.112	0.134	0.108	0.113	0.117	0.006	0.006
4288	Form_5255	CHAMP1	champ1.S	gnl|gene5158|XL-9_2-gene5158|rna15086|	473;478;484	160.6	TPAMSKSIMEFSE;KSIMEFSEEEDGS;SEEEDGSPPSKNM	K.SIMEFSEEEDGSPPSK.N	Chromosome alignment-maintaining phosphoprotein 1 (Fragment)						0.033	0.029	0.094	0.11	0.137	0.156	0.122	0.142	0.158	0.005	0.013	0.081	0.081	0.093	0.097	0.105	0.101	0.086	0.101	0.099	0.091	0.065	0.028	0.024	0.091	0.111	0.149	0.163	0.109	0.149	0.162	0.005	0.009
4288	Form_5260	CHAMP1	champ1.S	gnl|gene5158|XL-9_2-gene5158|rna15086|	484	70	SEEEDGSPPSKNM	K.SIMEFSEEEDGSPPSK.N	Chromosome alignment-maintaining phosphoprotein 1 (Fragment)						0.157	0.07	0.093	0.103	0.105	0.114	0.115	0.11	0.119	0.004	0.01	0.081	0.081	0.093	0.097	0.105	0.101	0.086	0.101	0.099	0.091	0.065	0.136	0.061	0.093	0.107	0.118	0.123	0.106	0.119	0.126	0.004	0.007
4289	Form_5256	CHAMP1	champ1.S	gnl|gene5158|XL-9_2-gene5158|rna15086|	525	61.9	KKPSALSEDEETP	K.KPSALSEDEETPIK.S	Chromosome alignment-maintaining phosphoprotein 1 (Fragment)						0.316	0.168	0.087	0.07	0.09	0.057	0.074	0.055	0.078	0.001	0.004	0.081	0.081	0.093	0.097	0.105	0.101	0.086	0.101	0.099	0.091	0.065	0.287	0.153	0.091	0.076	0.106	0.064	0.071	0.062	0.087	0.001	0.003
4289	Form_5268	CHAMP1	champ1.S	gnl|gene5158|XL-9_2-gene5158|rna15086|	530	99.5	LSEDEETPIKSNF	K.KPSALSEDEETPIK.S	Chromosome alignment-maintaining phosphoprotein 1 (Fragment)						0.063	0.039	0.11	0.131	0.121	0.156	0.114	0.132	0.125	0.005	0.004	0.081	0.081	0.093	0.097	0.105	0.101	0.086	0.101	0.099	0.091	0.065	0.053	0.033	0.107	0.132	0.132	0.164	0.102	0.139	0.129	0.005	0.003
4289	Form_5269	CHAMP1	champ1.S	gnl|gene5158|XL-9_2-gene5158|rna15086|	525;530	99.5	KKPSALSEDEETP;LSEDEETPIKSNF	K.KPSALSEDEETPIK.S	Chromosome alignment-maintaining phosphoprotein 1 (Fragment)						0.004	0.008	0.105	0.149	0.109	0.181	0.126	0.175	0.136	0	0.007	0.081	0.081	0.093	0.097	0.105	0.101	0.086	0.101	0.099	0.091	0.065	0.003	0.007	0.1	0.149	0.118	0.188	0.111	0.182	0.138	0	0.005
4290	Form_5264	CHAMP1	champ1.S	gnl|gene5158|XL-9_2-gene5158|rna15086|	584	52.3	PETGDISANASDM	K.DLSETPETGDISANASDMPDTSDDK.D	Chromosome alignment-maintaining phosphoprotein 1 (Fragment)						0.07	0.069	0.12	0.113	0.095	0.143	0.099	0.1	0.106	0.033	0.052	0.081	0.081	0.093	0.097	0.105	0.101	0.086	0.101	0.099	0.091	0.065	0.061	0.06	0.12	0.118	0.107	0.155	0.091	0.108	0.113	0.032	0.036
678	Form__848	CHD1	chd1.L	gnl|gene13168|XL-9_2-gene13168|rna38296|	221;222	53.4	KKREVDSSDDDYD;KREVDSSDDDYDD	K.REVDSSDDDYDDYNK.K	Chromodomain-helicase-DNA-binding protein 1						0.095	0.047	0.117	0.12	0.124	0.131	0.113	0.107	0.111	0.01	0.026	0.069	0.055	0.085	0.085	0.099	0.104	0.095	0.119	0.123	0.096	0.07	0.069	0.027	0.105	0.107	0.129	0.143	0.113	0.134	0.144	0.01	0.019
679	Form__846	CHD1	chd1.L	gnl|gene13168|XL-9_2-gene13168|rna38296|	239;243	31.7	VSRRQATVNVSYK;QATVNVSYKEDEE	R.RQATVNVSYK.E	Chromodomain-helicase-DNA-binding protein 1	GN:CHD1|CHD-1|human|O14646	0;0	237;241	SSRRQATVNVSYK;QATVNVSYKEDEE	NaN;NaN	0.021	0.009	0.068	0.07	0.122	0.139	0.176	0.186	0.174	0.008	0.028	0.069	0.055	0.085	0.085	0.099	0.104	0.095	0.119	0.123	0.096	0.07	0.014	0.005	0.056	0.058	0.117	0.14	0.162	0.215	0.208	0.007	0.019
680	Form__847	CHD1	chd1.L	gnl|gene13168|XL-9_2-gene13168|rna38296|	1398	52.9	RTELDVSVNKEPE	K.ENEDRTELDVSVNKEPEEK.K	Chromodomain-helicase-DNA-binding protein 1						0.033	0.034	0.103	0.111	0.131	0.1	0.163	0.135	0.167	0.006	0.016	0.069	0.055	0.085	0.085	0.099	0.104	0.095	0.119	0.123	0.096	0.07	0.023	0.019	0.088	0.095	0.13	0.105	0.156	0.162	0.206	0.006	0.011
1643	Form_2018	CHD4	chd4.L	gnl|gene17926|XL-9_2-gene17926|rna52406|	95	23	SEGSDYTPGKKKK	K.EDVDDSSGEGNDYGDNDGGPIRSDSEGSDYTPGK.K	DNA helicase (Fragment)	GN:CHD4|CHD-4|human|Q14839	0	111	SEGSDYTPGKKKK	NaN	0.022	0.02	0.07	0.075	0.078	0.09	0.084	0.081	0.101	0.196	0.183	0.091	0.089	0.091	0.092	0.097	0.094	0.092	0.093	0.091	0.084	0.085	0.022	0.02	0.071	0.077	0.084	0.094	0.086	0.084	0.103	0.184	0.174
1644	Form_2020	CHD4	chd4.L	gnl|gene17926|XL-9_2-gene17926|rna52406|	694	114.1	LDRPPDTPAVDPT	K.LDRPPDTPAVDPTVK.Y	DNA helicase (Fragment)	GN:CHD4|CHD-4|human|Q14839	0	703	LERPPETPTVDPT	NaN	0.009	0.007	0.066	0.092	0.121	0.148	0.125	0.15	0.172	0.066	0.043	0.091	0.089	0.091	0.092	0.097	0.094	0.092	0.093	0.091	0.084	0.085	0.009	0.007	0.065	0.092	0.128	0.151	0.125	0.152	0.17	0.06	0.04
1645	Form_2021	CHD4	chd4.L	gnl|gene17926|XL-9_2-gene17926|rna52406|	1535	13.8	PKTPTSSTPGDTQ	K.TPTSSTPGDTQPNTPAPPASNEDSTK.S	DNA helicase (Fragment)						0.013	0.005	0.024	0.067	0.146	0.137	0.127	0.204	0.254	0.013	0.009	0.091	0.089	0.091	0.092	0.097	0.094	0.092	0.093	0.091	0.084	0.085	0.013	0.005	0.024	0.066	0.153	0.139	0.126	0.205	0.249	0.012	0.008
1645	Form_2022	CHD4	chd4.L	gnl|gene17926|XL-9_2-gene17926|rna52406|	1531	20.8	DSPSPKTPTSSTP	K.IDSPSPKTPTSSTPGDTQPNTPAPPASNEDSTK.S	DNA helicase (Fragment)						0.053	0.045	0.058	0.083	0.128	0.12	0.086	0.09	0.074	0.151	0.114	0.091	0.089	0.091	0.092	0.097	0.094	0.092	0.093	0.091	0.084	0.085	0.053	0.044	0.058	0.084	0.137	0.124	0.087	0.092	0.074	0.14	0.107
1645	Form_2023	CHD4	chd4.L	gnl|gene17926|XL-9_2-gene17926|rna52406|	1544	62.4	GDTQPNTPAPPAS	K.TPTSSTPGDTQPNTPAPPASNEDSTK.S	DNA helicase (Fragment)	GN:CHD4|CHD-4|human|Q14839	0	1553	GDTQPNTPAPVPP	NaN	0.076	0.055	0.097	0.07	0.065	0.064	0.054	0.067	0.074	0.142	0.235	0.091	0.089	0.091	0.092	0.097	0.094	0.092	0.093	0.091	0.084	0.085	0.078	0.055	0.099	0.072	0.071	0.067	0.056	0.07	0.076	0.134	0.224
1646	Form_2017	CHD4	chd4.L	gnl|gene17926|XL-9_2-gene17926|rna52406|	1589	50.5	PTPDTQSPAAQTE	K.EETTDNEVKPTEENNETTQPTPDTQSPAAQTEEK.K	DNA helicase (Fragment)						0.061	0.043	0.078	0.093	0.094	0.106	0.087	0.111	0.145	0.088	0.094	0.091	0.089	0.091	0.092	0.097	0.094	0.092	0.093	0.091	0.084	0.085	0.061	0.042	0.078	0.094	0.1	0.109	0.088	0.113	0.145	0.081	0.088
1647	Form_2019	CHD4	chd4.L	gnl|gene17926|XL-9_2-gene17926|rna52406|	1657	190.2	TLQNGETPKETAE	K.DDVQEVTLQNGETPK.E	DNA helicase (Fragment)						0.028	0.02	0.097	0.115	0.096	0.102	0.095	0.127	0.15	0.087	0.083	0.091	0.089	0.091	0.092	0.097	0.094	0.092	0.093	0.091	0.084	0.085	0.028	0.02	0.097	0.116	0.102	0.105	0.096	0.129	0.15	0.08	0.077
693	Form__868	CHD7	chd7.S	gnl|gene13221|XL-9_2-gene13221|rna38478|	587	60.4	PSMQSQTPQKKRK	R.ISGPNASLISTEDFLPSMQSQTPQK.K	Chromodomain-helicase-DNA-binding protein 7						0.041	0.062	0.085	0.102	0.107	0.094	0.114	0.12	0.122	0.064	0.09	0.089	0.092	0.101	0.09	0.093	0.101	0.096	0.087	0.09	0.083	0.076	0.04	0.063	0.094	0.101	0.109	0.104	0.12	0.115	0.121	0.058	0.075
694	Form__867	CHD7	chd7.S	gnl|gene13221|XL-9_2-gene13221|rna38478|	1869	5000	IDEFANSPMEDKE	K.DDIDEFANSPMEDK.E	Chromodomain-helicase-DNA-binding protein 7	GN:CHD7|CHD-7|human|Q9P2D1	0	1874	IDEFANSPSEDKE	NaN	0.069	0.053	0.096	0.115	0.106	0.124	0.099	0.134	0.108	0.038	0.058	0.089	0.092	0.101	0.09	0.093	0.101	0.096	0.087	0.09	0.083	0.076	0.067	0.053	0.106	0.113	0.107	0.137	0.104	0.127	0.106	0.034	0.048
695	Form__870	CHD7	chd7.S	gnl|gene13221|XL-9_2-gene13221|rna38478|	2214;2219	122.1	ADTAEKSIIQESD;KSIIQESDPEAVT	K.SIIQESDPEAVTIK.E	Chromodomain-helicase-DNA-binding protein 7						0.04	0.043	0.121	0.145	0.137	0.116	0.117	0.134	0.133	0.006	0.009	0.089	0.092	0.101	0.09	0.093	0.101	0.096	0.087	0.09	0.083	0.076	0.038	0.042	0.131	0.14	0.137	0.126	0.12	0.125	0.128	0.005	0.007
696	Form__872	CHD7	chd7.S	gnl|gene13221|XL-9_2-gene13221|rna38478|	2261	46.9	LDYDDKSEESSQA	K.LDYDDKSEESSQAEVGISSQDK.N	Chromodomain-helicase-DNA-binding protein 7						0.084	0.037	0.112	0.122	0.14	0.115	0.114	0.119	0.143	0.009	0.005	0.089	0.092	0.101	0.09	0.093	0.101	0.096	0.087	0.09	0.083	0.076	0.08	0.037	0.121	0.118	0.14	0.125	0.118	0.111	0.138	0.008	0.004
696	Form__873	CHD7	chd7.S	gnl|gene13221|XL-9_2-gene13221|rna38478|	2261;2265	49.5	LDYDDKSEESSQA;DKSEESSQAEVGI	K.LDYDDKSEESSQAEVGISSQDK.N	Chromodomain-helicase-DNA-binding protein 7						0.083	0.047	0.093	0.115	0.147	0.133	0.109	0.124	0.135	0.004	0.011	0.089	0.092	0.101	0.09	0.093	0.101	0.096	0.087	0.09	0.083	0.076	0.079	0.046	0.101	0.111	0.147	0.144	0.112	0.116	0.13	0.004	0.009
696	Form__874	CHD7	chd7.S	gnl|gene13221|XL-9_2-gene13221|rna38478|	2261;2264;2265	49.5	LDYDDKSEESSQA;DDKSEESSQAEVG;DKSEESSQAEVGI	K.LDYDDKSEESSQAEVGISSQDK.N	Chromodomain-helicase-DNA-binding protein 7						0.155	0.067	0.096	0.107	0.118	0.105	0.101	0.117	0.12	0.003	0.009	0.089	0.092	0.101	0.09	0.093	0.101	0.096	0.087	0.09	0.083	0.076	0.149	0.067	0.105	0.104	0.119	0.115	0.105	0.11	0.117	0.003	0.007
697	Form__871	CHD7	chd7.S	gnl|gene13221|XL-9_2-gene13221|rna38478|	2282;2285	50.4	KNFDEESNASLST;DEESNASLSTARD	K.NFDEESNASLSTAR.D	Chromodomain-helicase-DNA-binding protein 7	GN:CHD7|CHD-7|human|Q9P2D1	0;0	2272;2275	KNFDEESNASMST;DEESNASMSTARD	NaN;NaN	0.076	0.045	0.134	0.141	0.136	0.126	0.103	0.115	0.11	0.006	0.009	0.089	0.092	0.101	0.09	0.093	0.101	0.096	0.087	0.09	0.083	0.076	0.072	0.044	0.145	0.136	0.135	0.136	0.106	0.107	0.106	0.005	0.007
698	Form__869	CHD7	chd7.S	gnl|gene13221|XL-9_2-gene13221|rna38478|	2305	5000	LEDGDQSGLHMLR	R.DGFFLEDGDQSGLHMLR.E	Chromodomain-helicase-DNA-binding protein 7						0.01	0.015	0.099	0.142	0.093	0.136	0.123	0.223	0.138	0.008	0.012	0.089	0.092	0.101	0.09	0.093	0.101	0.096	0.087	0.09	0.083	0.076	0.01	0.015	0.108	0.138	0.093	0.148	0.127	0.209	0.134	0.007	0.01
699	Form__865	CHD7	chd7.S	gnl|gene13221|XL-9_2-gene13221|rna38478|	2561	26.8	YDEDIETPPTRNI	K.AYDEDIETPPTR.N	Chromodomain-helicase-DNA-binding protein 7	GN:CHD7|CHD-7|human|Q9P2D1	0	2551	FEEDIETPPTRNI	NaN	0.025	0.017	0.061	0.116	0.118	0.134	0.14	0.186	0.179	0.014	0.01	0.089	0.092	0.101	0.09	0.093	0.101	0.096	0.087	0.09	0.083	0.076	0.024	0.017	0.067	0.113	0.119	0.147	0.145	0.175	0.174	0.013	0.008
700	Form__866	CHD7	chd7.S	gnl|gene13221|XL-9_2-gene13221|rna38478|	2569	153.7	PTRNIPSPGQLEP	R.NIPSPGQLEPETR.I	Chromodomain-helicase-DNA-binding protein 7	GN:CHD7|CHD-7|human|Q9P2D1	0	2559	PTRNIPSPGQLDP	NaN	0.045	0.031	0.088	0.11	0.119	0.112	0.107	0.128	0.124	0.06	0.077	0.089	0.092	0.101	0.09	0.093	0.101	0.096	0.087	0.09	0.083	0.076	0.044	0.031	0.097	0.109	0.121	0.124	0.113	0.122	0.122	0.055	0.064
3687	Form_4530	CHD7	chd7.L	gnl|gene45283|XL-9_2-gene45283|rna89590|	1120	27.7	LDYDDKSEESSQA	K.LDYDDKSEESSQAEVGITSQDK.N	Chromodomain-helicase-DNA-binding protein 7						0.155	0.078	0.141	0.125	0.137	0.109	0.078	0.092	0.077	0.003	0.005	0.077	0.092	0.076	0.086	0.082	0.096	0.1	0.089	0.107	0.091	0.105	0.137	0.082	0.123	0.123	0.129	0.12	0.089	0.094	0.095	0.003	0.006
3687	Form_4531	CHD7	chd7.L	gnl|gene45283|XL-9_2-gene45283|rna89590|	1120;1123;1124	54.1	LDYDDKSEESSQA;DDKSEESSQAEVG;DKSEESSQAEVGI	K.LDYDDKSEESSQAEVGITSQDK.N	Chromodomain-helicase-DNA-binding protein 7	GN:CHD7|CHD-7|human|Q9P2D1	0	2254	DDKSEESSQPEAG	NaN	0.223	0.079	0.139	0.105	0.113	0.093	0.076	0.084	0.08	0.004	0.004	0.077	0.092	0.076	0.086	0.082	0.096	0.1	0.089	0.107	0.091	0.105	0.198	0.084	0.122	0.104	0.107	0.103	0.088	0.086	0.099	0.004	0.005
601	Form__757	CHD8	chd8.S	gnl|gene12831|XL-9_2-gene12831|rna37290|	545;556	5000	DLDIKITDDEDDE;DEEVDVTGPVKTQ	K.ITDDEDDEEVDVTGPVK.T	Chromodomain-helicase-DNA-binding protein 8 (Fragment)	GN:CHD8|CHD-8|human|Q9HCK8	0;0	594;605	DLDIKITDDEEEE;EEEVDVTGPIKPE	NaN;NaN	0.008	0.016	0.126	0.121	0.11	0.125	0.124	0.155	0.158	0.036	0.02	0.1	0.097	0.093	0.095	0.1	0.1	0.085	0.092	0.086	0.074	0.08	0.009	0.017	0.127	0.125	0.12	0.136	0.115	0.155	0.148	0.029	0.017
602	Form__756	CHD8	chd8.S	gnl|gene12831|XL-9_2-gene12831|rna37290|	1372;1376	5000	DDMVEFSDLESDD;EFSDLESDDDDRP	K.DDDMVEFSDLESDDDDRPK.A	Chromodomain-helicase-DNA-binding protein 8 (Fragment)	GN:CHD8|CHD-8|human|Q9HCK8	0;0	1420;1424	DDLVEFSDLESED;EFSDLESEDDERP	NaN;NaN	0.138	0.023	0.049	0.07	0.046	0.083	0.184	0.235	0.156	0.009	0.008	0.1	0.097	0.093	0.095	0.1	0.1	0.085	0.092	0.086	0.074	0.08	0.15	0.024	0.05	0.072	0.05	0.09	0.17	0.235	0.146	0.007	0.007
3262	Form_4012	CHFR	chfr.L	gnl|gene4172|XL-9_2-gene4172|rna12144|	217	118.5	STQEQGSLGPPKK	K.SNLSTQEQGSLGPPK.K	E3 ubiquitin-protein ligase CHFR						0.003	0.002	0.14	0.149	0.077	0.115	0.152	0.214	0.135	0.006	0.007	0.095	0.088	0.101	0.104	0.104	0.102	0.073	0.083	0.095	0.073	0.083	0.003	0.002	0.153	0.167	0.086	0.127	0.12	0.192	0.138	0.005	0.006
3112	Form_3820	CHTF18	chtf18.L	gnl|gene40009|XL-9_2-gene40009|rna81824|	137;141;145	93	ALSDDITPPPSPN;DITPPPSPNHSPK;PPSPNHSPKKNER	R.DEYAGNSTALSDDITPPPSPNHSPK.K	Chromosome transmission fidelity protein 18 homolog						0.151	0.087	0.106	0.101	0.112	0.106	0.099	0.106	0.109	0.008	0.016	0.091	0.087	0.097	0.1	0.102	0.097	0.091	0.087	0.088	0.077	0.084	0.147	0.081	0.11	0.108	0.123	0.11	0.097	0.099	0.103	0.007	0.014
49	Form___74	CHURC1-FNTB	fntb.S	gnl|gene10155|XL-9_2-gene10155|rna29530|	17	74.5	VRERHRTEHLQED	R.HRTEHLQEDSVPTETSAEQK.K	Protein farnesyltransferase subunit beta						0.007	0.009	0.065	0.085	0.113	0.13	0.042	0.043	0.09	0.194	0.222	0.074	0.075	0.075	0.066	0.075	0.068	0.113	0.116	0.103	0.117	0.119	0.005	0.007	0.05	0.058	0.087	0.091	0.049	0.051	0.095	0.234	0.272
1144	Form_1420	CHURC1-FNTB	fntb.L	gnl|gene15419|XL-9_2-gene15419|rna45004|	408	49.7	KKAVPETPNSSKN	K.AVPETPNSSK.N	Protein farnesyltransferase subunit beta						0.006	0.01	0.192	0.146	0.142	0.146	0.083	0.1	0.127	0.025	0.023	0.06	0.063	0.049	0.059	0.062	0.066	0.099	0.114	0.088	0.169	0.171	0.005	0.008	0.123	0.113	0.115	0.126	0.108	0.149	0.146	0.055	0.052
3247	Form_3996	CIRBP	cirbp.L	gnl|gene4142|XL-9_2-gene4142|rna12062|	154	31.3	GDRSGGSYRDSYD	R.SGGSYRDSYDSYATHE.-	Cold-inducible RNA-binding protein	GN:CIRBP|CIRBP|human|Q14011	1	159	DRSSGGSYRDSYD	NaN	0.043	0.033	0.171	0.146	0.138	0.17	0.097	0.106	0.085	0.003	0.006	0.078	0.096	0.07	0.087	0.081	0.079	0.1	0.106	0.106	0.098	0.098	0.039	0.037	0.138	0.146	0.129	0.155	0.112	0.13	0.104	0.003	0.007
3247	Form_3997	CIRBP	cirbp.L	gnl|gene4142|XL-9_2-gene4142|rna12062|	158	27.5	GGSYRDSYDSYAT	R.SGGSYRDSYDSYATHE.-	Cold-inducible RNA-binding protein	GN:CIRBP|CIRBP|human|Q14011	1	163	GGSYRDSYDSYAT	NaN	0.064	0.043	0.142	0.102	0.137	0.141	0.118	0.122	0.123	0.004	0.005	0.078	0.096	0.07	0.087	0.081	0.079	0.1	0.106	0.106	0.098	0.098	0.056	0.047	0.112	0.1	0.125	0.126	0.133	0.146	0.147	0.004	0.005
4783	Form_5864	CIRBP	cirbp.S	gnl|gene780|XL-9_2-gene780|rna2274|	125	52.6	SRFDNRSGGYGGS	R.FDNRSGGYGGSSGSR.D	Cold-inducible RNA-binding protein	GN:CIRBP|CIRBP|human|Q14011	0	132	NRFESRSGGYGGS	NaN	0.033	0.016	0.169	0.099	0.14	0.123	0.13	0.114	0.161	0.006	0.008	0.085	0.085	0.086	0.094	0.088	0.086	0.098	0.099	0.105	0.087	0.086	0.03	0.015	0.156	0.1	0.132	0.114	0.137	0.121	0.182	0.006	0.007
5238	Form_6411	CISD3	cisd3.L	gnl|gene9889|XL-9_2-gene9889|rna28749|	67	5000	QAAPGLSPLRFTP	R.QAAPGLSPLR.F	CDGSH iron-sulfur domain-containing protein 3, mitochondrial						0.107	0.075	0.112	0.098	0.116	0.092	0.099	0.094	0.102	0.039	0.065	0.088	0.09	0.094	0.097	0.096	0.106	0.088	0.093	0.098	0.075	0.074	0.102	0.073	0.114	0.103	0.12	0.106	0.094	0.095	0.108	0.032	0.052
4403	Form_5409	CIT	cit.L	gnl|gene5814|XL-9_2-gene5814|rna17014|	442	89.1	IASGLDSPAKVSS	K.SESIASGLDSPAK.V	Citron Rho-interacting kinase	GN:CIT|CRIK|human|O14578	0	440	VVSGLDSPAKTSS	NaN	0.058	0.033	0.091	0.108	0.113	0.133	0.12	0.149	0.147	0.021	0.027	0.092	0.089	0.093	0.095	0.093	0.091	0.095	0.092	0.094	0.08	0.085	0.058	0.032	0.091	0.111	0.114	0.131	0.123	0.148	0.149	0.018	0.025
4404	Form_5408	CIT	cit.L	gnl|gene5814|XL-9_2-gene5814|rna17014|	482	240.6	RLHRRVSEVEAVL	R.RVSEVEAVLSQK.E	Citron Rho-interacting kinase	GN:CIT|CRIK|human|O14578	0	480	RLHRRVSEVEAVL	NaN	0.123	0.103	0.089	0.109	0.107	0.106	0.104	0.122	0.116	0.007	0.014	0.092	0.089	0.093	0.095	0.093	0.091	0.095	0.092	0.094	0.08	0.085	0.122	0.099	0.09	0.112	0.108	0.104	0.107	0.121	0.118	0.006	0.013
4405	Form_5406	CIT	cit.L	gnl|gene5814|XL-9_2-gene5814|rna17014|	1480	5000	CREKMNSPGMQMK	K.MNSPGMQMK.D	Citron Rho-interacting kinase	GN:CIT|CRIK|human|O14578	0	1432	CRDKMNSPGLQTK	NaN	0.028	0.03	0.204	0.1	0.155	0.149	0.099	0.079	0.101	0.016	0.037	0.092	0.089	0.093	0.095	0.093	0.091	0.095	0.092	0.094	0.08	0.085	0.028	0.029	0.205	0.103	0.156	0.147	0.102	0.079	0.103	0.014	0.034
4406	Form_5407	CIT	cit.L	gnl|gene5814|XL-9_2-gene5814|rna17014|	1986;1987	5000	ITKRKASSPVPAE;TKRKASSPVPAEV	K.RKASSPVPAEVQGLVR.E	Citron Rho-interacting kinase	GN:CIT|CRIK|human|O14578	0	1939	ITKRVASSPAPPE	NaN	0.026	0.021	0.091	0.128	0.158	0.148	0.118	0.147	0.148	0.007	0.008	0.092	0.089	0.093	0.095	0.093	0.091	0.095	0.092	0.094	0.08	0.085	0.026	0.02	0.091	0.131	0.158	0.145	0.121	0.146	0.15	0.006	0.007
4407	Form_5410	CIT	cit.L	gnl|gene5814|XL-9_2-gene5814|rna17014|	2040	66.8	STRRERSPGRPFE	R.SPGRPFEESNR.S	Citron Rho-interacting kinase	GN:CIT|CRIK|human|O14578	0	1993	STRRERSPGRLFE	NaN	0.108	0.071	0.141	0.077	0.106	0.101	0.091	0.093	0.119	0.025	0.068	0.092	0.089	0.093	0.095	0.093	0.091	0.095	0.092	0.094	0.08	0.085	0.108	0.069	0.142	0.079	0.107	0.1	0.094	0.093	0.121	0.022	0.063
2068	Form_2528	CKAP5	ckap5.L	gnl|gene19906|XL-9_2-gene19906|rna58131|	1101	30.2	VAQASASPPPAAS	K.QPPAVAQASASPPPAASSDSGSSTSDYKPDPK.K	Cytoskeleton-associated protein 5						0.028	0.029	0.083	0.09	0.112	0.128	0.113	0.126	0.124	0.086	0.08	0.086	0.088	0.093	0.097	0.096	0.097	0.094	0.099	0.091	0.08	0.079	0.026	0.028	0.084	0.095	0.117	0.135	0.115	0.135	0.122	0.075	0.069
2069	Form_2529	CKAP5	ckap5.L	gnl|gene19906|XL-9_2-gene19906|rna58131|	1154	43.1	PSNTSLTPSKANT	K.TQSVSSEGNTSLNPSNTSLTPSK.A	Cytoskeleton-associated protein 5						0.024	0.049	0.105	0.062	0.063	0.043	0.043	0.046	0.071	0.253	0.24	0.086	0.088	0.093	0.097	0.096	0.097	0.094	0.099	0.091	0.08	0.079	0.024	0.05	0.113	0.069	0.07	0.048	0.047	0.052	0.075	0.233	0.219
1614	Form_1986	CLASP1	clasp1.L	gnl|gene17760|XL-9_2-gene17760|rna51911|	554	18.2	SATSKSTPGSLQR	K.STPGSLQR.S	CLIP-associating protein 1						0.003	0.016	0.283	0.131	0.086	0.111	0.108	0.104	0.081	0.024	0.052	0.08	0.072	0.071	0.099	0.097	0.105	0.083	0.093	0.079	0.113	0.109	0.003	0.013	0.228	0.147	0.095	0.133	0.102	0.11	0.073	0.031	0.065
4958	Form_6074	CLASP1	clasp1.S	gnl|gene8389|XL-9_2-gene8389|rna24426|	246	55.4	NFDDEDSVDGNRP	K.NFDDEDSVDGNRPSSASSSASSK.A	CLIP-associating protein 1	GN:CLASP1|CLASP1|human|Q7Z460	0	246	NFDDEDSVDGNRP	NaN	0.108	0.086	0.155	0.127	0.105	0.106	0.12	0.11	0.073	0.006	0.004	0.101	0.087	0.1	0.105	0.104	0.098	0.09	0.084	0.086	0.069	0.075	0.114	0.078	0.162	0.14	0.114	0.109	0.113	0.097	0.066	0.004	0.003
4959	Form_6073	CLASP1	clasp1.S	gnl|gene8389|XL-9_2-gene8389|rna24426|	673;675	14.5	SQSQPGSRSSSPG;SQPGSRSSSPGKL	K.VVSQSQPGSRSSSPGK.L	CLIP-associating protein 1						0.067	0.067	0.152	0.133	0.102	0.152	0.11	0.13	0.069	0.01	0.009	0.101	0.087	0.1	0.105	0.104	0.098	0.09	0.084	0.086	0.069	0.075	0.071	0.061	0.16	0.147	0.111	0.156	0.104	0.115	0.062	0.007	0.007
4960	Form_6072	CLASP1	clasp1.S	gnl|gene8389|XL-9_2-gene8389|rna24426|	1104	38.4	SNSSMGSPSNTIG	K.NSSNSSMGSPSNTIGR.T	CLIP-associating protein 1	GN:CLASP1|CLASP1|human|Q7Z460	0	1091	SNTSVGSPSNTIG	NaN	0.039	0.053	0.101	0.095	0.133	0.122	0.105	0.107	0.152	0.044	0.049	0.101	0.087	0.1	0.105	0.104	0.098	0.09	0.084	0.086	0.069	0.075	0.043	0.05	0.109	0.108	0.149	0.129	0.102	0.097	0.141	0.033	0.04
4549	Form_5578	CLCN5	clcn5.L	gnl|gene6542|XL-9_2-gene6542|rna19146|	52	27.3	MAAGFVSYNGNGL	R.DMAAGFVSYNGNGLNGGAK.V	Chloride channel protein (Fragment)						0.07	0.07	0.072	0.113	0.126	0.145	0.118	0.146	0.117	0.013	0.012	0.103	0.088	0.109	0.099	0.092	0.093	0.081	0.083	0.092	0.072	0.087	0.079	0.067	0.086	0.122	0.126	0.147	0.104	0.132	0.117	0.01	0.011
1694	Form_2080	CLINT1	clint1.S	gnl|gene18199|XL-9_2-gene18199|rna53171|	331	233.8	VNFLFDSGQKSGS	K.SSNDLVNFLFDSGQK.S	Clathrin interactor 1						0.005	0.004	0.047	0.049	0.063	0.077	0.179	0.22	0.336	0.004	0.016	0.1	0.092	0.09	0.089	0.099	0.095	0.089	0.086	0.094	0.082	0.085	0.005	0.004	0.046	0.048	0.068	0.08	0.175	0.208	0.347	0.004	0.015
1694	Form_2081	CLINT1	clint1.S	gnl|gene18199|XL-9_2-gene18199|rna53171|	321	24.9	AATSKSSNDLVNF	K.SSNDLVNFLFDSGQK.S	Clathrin interactor 1						0.011	0.003	0.019	0.027	0.054	0.065	0.213	0.262	0.329	0.006	0.012	0.1	0.092	0.09	0.089	0.099	0.095	0.089	0.086	0.094	0.082	0.085	0.012	0.003	0.019	0.026	0.059	0.068	0.209	0.248	0.34	0.005	0.011
552	Form__699	CLIP1	clip1.S	gnl|gene12507|XL-9_2-gene12507|rna36378|	140	35.8	TQTAPVSRSTSPT	K.PLEEESNGTQTAPVSR.S	CAP-Gly domain-containing linker protein 1 (Fragment)						0.165	0.093	0.107	0.106	0.098	0.105	0.091	0.101	0.112	0.008	0.013	0.091	0.09	0.091	0.091	0.097	0.095	0.093	0.092	0.089	0.082	0.089	0.164	0.091	0.106	0.105	0.104	0.109	0.092	0.101	0.109	0.007	0.013
553	Form__700	CLIP1	clip1.S	gnl|gene12507|XL-9_2-gene12507|rna36378|	302;305	116.5	IATMPTTPASLKR;MPTTPASLKRSPS	K.IATMPTTPASLK.R	CAP-Gly domain-containing linker protein 1 (Fragment)	GN:CLIP1|Restin|human|P30622	0	306	MATTSASLKRSPS	NaN	0.009	0.044	0.196	0.206	0.135	0.165	0.087	0.094	0.058	0.003	0.003	0.091	0.09	0.091	0.091	0.097	0.095	0.093	0.092	0.089	0.082	0.089	0.009	0.043	0.193	0.202	0.141	0.169	0.087	0.093	0.056	0.003	0.003
3798	Form_4668	CLIP1	clip1.L	gnl|gene46437|XL-9_2-gene46437|rna91207|	178	17.6	SAKESSTPAQLSN	K.ESSTPAQLSNLTR.T	CAP-Gly domain-containing linker protein 1 (Fragment)						0.011	0.03	0.299	0.193	0.131	0.114	0.082	0.052	0.037	0.026	0.024	0.095	0.09	0.093	0.098	0.099	0.097	0.095	0.091	0.086	0.075	0.082	0.011	0.029	0.295	0.201	0.138	0.117	0.083	0.05	0.034	0.021	0.021
3798	Form_4669	CLIP1	clip1.L	gnl|gene46437|XL-9_2-gene46437|rna91207|	183	30.7	STPAQLSNLTRTT	K.ESSTPAQLSNLTR.T	CAP-Gly domain-containing linker protein 1 (Fragment)						0.021	0.013	0.061	0.103	0.155	0.139	0.129	0.136	0.136	0.067	0.039	0.095	0.09	0.093	0.098	0.099	0.097	0.095	0.091	0.086	0.075	0.082	0.022	0.013	0.061	0.109	0.166	0.146	0.133	0.134	0.127	0.054	0.035
3799	Form_4670	CLIP1	clip1.L	gnl|gene46437|XL-9_2-gene46437|rna91207|	301;304	91.2	IATTPATPASLKR;TPATPASLKRSPS	K.IATTPATPASLK.R	CAP-Gly domain-containing linker protein 1 (Fragment)						0.026	0.084	0.106	0.132	0.162	0.131	0.12	0.119	0.112	0.005	0.005	0.095	0.09	0.093	0.098	0.099	0.097	0.095	0.091	0.086	0.075	0.082	0.026	0.08	0.105	0.137	0.17	0.135	0.121	0.115	0.102	0.004	0.004
3800	Form_4671	CLIP1	clip1.L	gnl|gene46437|XL-9_2-gene46437|rna91207|	346	19.3	RYARKISGTTALQ	R.KISGTTALQEALK.E	CAP-Gly domain-containing linker protein 1 (Fragment)	GN:CLIP1|Restin|human|P30622	0	348	RYARKISGTTALQ	NaN	0.105	0.06	0.053	0.061	0.094	0.111	0.129	0.148	0.184	0.025	0.03	0.095	0.09	0.093	0.098	0.099	0.097	0.095	0.091	0.086	0.075	0.082	0.108	0.058	0.053	0.065	0.101	0.117	0.133	0.146	0.171	0.02	0.027
1485	Form_1822	CLNS1A	clns1a	gnl|gene1709|XL-9_2-gene1709|rna4972|	102	158.5	DQEEEESEDDDDD	K.EAHMADQEEEESEDDDDDEEPITEIR.F	Methylosome subunit pICln						0.089	0.047	0.079	0.082	0.104	0.148	0.131	0.156	0.135	0.014	0.016	0.085	0.081	0.077	0.081	0.082	0.079	0.101	0.103	0.097	0.104	0.109	0.084	0.042	0.068	0.074	0.095	0.13	0.147	0.179	0.146	0.016	0.02
1826	Form_2247	CLPB	clpb.L	gnl|gene18723|XL-9_2-gene18723|rna54656|	649	21	LTPEDLSFSxxxx	R.RLDIQEPLTPEDLSFS.-	Caseinolytic peptidase B protein homolog (Fragment)						0.029	0.014	0.062	0.062	0.083	0.074	0.197	0.188	0.276	0.007	0.008	0.092	0.088	0.091	0.093	0.092	0.092	0.09	0.095	0.083	0.096	0.089	0.03	0.014	0.063	0.064	0.085	0.076	0.198	0.199	0.256	0.008	0.008
1915	Form_2351	CLSPN	clspn.S	gnl|gene19214|XL-9_2-gene19214|rna56135|	57	5000	CVEDKDTDDEILV	K.DTDDEILVR.K	Claspin						0.098	0.083	0.126	0.102	0.121	0.123	0.111	0.109	0.11	0.008	0.009	0.056	0.055	0.073	0.084	0.089	0.102	0.099	0.117	0.119	0.115	0.091	0.061	0.051	0.103	0.096	0.12	0.14	0.123	0.142	0.146	0.01	0.009
1916	Form_2354	CLSPN	clspn.S	gnl|gene19214|XL-9_2-gene19214|rna56135|	95	161.5	DNVKGHSDNEENE	K.GHSDNEENEETMSAYREK.P	Claspin						0.113	0.051	0.117	0.113	0.131	0.141	0.102	0.091	0.128	0.004	0.009	0.056	0.055	0.073	0.084	0.089	0.102	0.099	0.117	0.119	0.115	0.091	0.07	0.031	0.094	0.105	0.129	0.159	0.112	0.117	0.168	0.005	0.009
1917	Form_2352	CLSPN	clspn.S	gnl|gene19214|XL-9_2-gene19214|rna56135|	270	149.8	TEGNQESPEKRKE	K.LNSHSAENFEDFELDTEGNQESPEK.R	Claspin						0.048	0.059	0.099	0.094	0.109	0.123	0.137	0.141	0.165	0.007	0.018	0.056	0.055	0.073	0.084	0.089	0.102	0.099	0.117	0.119	0.115	0.091	0.028	0.034	0.076	0.083	0.102	0.131	0.142	0.173	0.206	0.008	0.017
1918	Form_2357	CLSPN	clspn.S	gnl|gene19214|XL-9_2-gene19214|rna56135|	801	96.9	QDLYNASPEPKAS	K.MSEPSLPVEDSQDLYNASPEPK.A	Claspin	GN:CLSPN|claspin|human|Q9HAW4	0	846	QDLYNASPEPKTL	NaN	0.084	0.112	0.163	0.15	0.113	0.127	0.07	0.066	0.056	0.016	0.043	0.056	0.055	0.073	0.084	0.089	0.102	0.099	0.117	0.119	0.115	0.091	0.055	0.072	0.139	0.147	0.118	0.152	0.081	0.09	0.078	0.021	0.046
1919	Form_2355	CLSPN	clspn.S	gnl|gene19214|XL-9_2-gene19214|rna56135|	1083	52.8	ADGDLHSDGPGRT	R.YLADGDLHSDGPGR.T	Claspin	GN:CLSPN|claspin|human|Q9HAW4	0	1129	ADGDLHSDGPGRM	NaN	0.103	0.074	0.19	0.13	0.093	0.108	0.094	0.09	0.078	0.011	0.029	0.056	0.055	0.073	0.084	0.089	0.102	0.099	0.117	0.119	0.115	0.091	0.066	0.047	0.159	0.125	0.095	0.127	0.107	0.121	0.106	0.015	0.03
1920	Form_2356	CLSPN	clspn.S	gnl|gene19214|XL-9_2-gene19214|rna56135|	1147	125.6	REQPQGSRDNNEE	R.EQPQGSRDNNEEEEEDIGEDSQFMK.L	Claspin						0.018	0.017	0.061	0.052	0.14	0.124	0.159	0.17	0.239	0.005	0.015	0.056	0.055	0.073	0.084	0.089	0.102	0.099	0.117	0.119	0.115	0.091	0.01	0.009	0.044	0.043	0.122	0.124	0.154	0.195	0.279	0.006	0.013
1921	Form_2353	CLSPN	clspn.S	gnl|gene19214|XL-9_2-gene19214|rna56135|	1246	119.7	FVFQTVSPGKKEE	R.NFVFQTVSPGK.K	Claspin						0.057	0.041	0.12	0.096	0.13	0.116	0.12	0.105	0.145	0.023	0.047	0.056	0.055	0.073	0.084	0.089	0.102	0.099	0.117	0.119	0.115	0.091	0.034	0.024	0.093	0.086	0.123	0.126	0.126	0.131	0.183	0.028	0.045
4640	Form_5694	CLTB	cltb.S	gnl|gene7019|XL-9_2-gene7019|rna20495|	151	16.9	KVSNRASDEALAA	K.VSNRASDEALAADTK.E	Clathrin light chain B						0.121	0.076	0.12	0.107	0.111	0.103	0.104	0.1	0.145	0.004	0.008	0.097	0.092	0.11	0.101	0.103	0.098	0.092	0.089	0.083	0.066	0.071	0.123	0.073	0.138	0.113	0.12	0.106	0.1	0.093	0.126	0.003	0.006
3877	Form_4764	CLUAP1	cluap1.L	gnl|gene47112|XL-9_2-gene47112|rna92137|	416	93	RAPKADSLVESDN	K.ADSLVESDNDF.-	Clusterin associated protein 1, isoform CRA_a						0.028	0.023	0.067	0.083	0.113	0.115	0.149	0.211	0.201	0	0.011	0.092	0.083	0.102	0.086	0.105	0.103	0.095	0.084	0.094	0.078	0.079	0.027	0.02	0.073	0.076	0.127	0.126	0.151	0.189	0.201	0	0.009
1819	Form_2237	CLUH	cluh.S	gnl|gene18694|XL-9_2-gene18694|rna54569|	19	157.3	PLPAAQTPDKSPE	K.TEEPGVHSPLPAAQTPDK.S	Clustered mitochondria protein homolog (Fragment)						0.027	0.032	0.149	0.191	0.152	0.138	0.104	0.082	0.035	0.042	0.047	0.093	0.092	0.095	0.095	0.096	0.098	0.088	0.093	0.095	0.079	0.077	0.027	0.032	0.152	0.195	0.157	0.145	0.098	0.082	0.036	0.036	0.039
1819	Form_2238	CLUH	cluh.S	gnl|gene18694|XL-9_2-gene18694|rna54569|	12	72.7	EEPGVHSPLPAAQ	K.TEEPGVHSPLPAAQTPDK.S	Clustered mitochondria protein homolog (Fragment)						0.018	0.028	0.14	0.186	0.16	0.148	0.117	0.089	0.048	0.032	0.034	0.093	0.092	0.095	0.095	0.096	0.098	0.088	0.093	0.095	0.079	0.077	0.018	0.028	0.142	0.189	0.165	0.155	0.11	0.089	0.049	0.027	0.028
999	Form_1225	CNDP2	cndp2.L	gnl|gene14635|XL-9_2-gene14635|rna42653|	446	70.6	ADDGAHSQNEKLN	K.NVMLLPVGSADDGAHSQNEK.L	Cytosolic non-specific dipeptidase	GN:CNDP2|CNDP2|human|Q96KP4	0	446	ADDGAHSQNEKLN	NaN	0.053	0.023	0.063	0.082	0.132	0.124	0.124	0.157	0.211	0.005	0.025	0.088	0.091	0.099	0.096	0.091	0.096	0.089	0.09	0.093	0.084	0.084	0.051	0.023	0.068	0.086	0.13	0.129	0.12	0.153	0.213	0.005	0.023
3640	Form_4473	CNKSR1	cnksr1.L	gnl|gene44874|XL-9_2-gene44874|rna88983|	333	29.6	GAAAWQTPNRQIL	K.AEITTGAAAWQTPNR.Q	Connector enhancer of kinase suppressor of Ras 1, isoform CRA_a						0.019	0.024	0.12	0.124	0.109	0.13	0.132	0.12	0.1	0.054	0.069	0.102	0.099	0.105	0.098	0.111	0.102	0.077	0.079	0.081	0.074	0.073	0.021	0.026	0.138	0.133	0.133	0.146	0.112	0.104	0.089	0.044	0.055
3641	Form_4474	CNKSR1	cnksr1.L	gnl|gene44874|XL-9_2-gene44874|rna88983|	352;361	103	ETRTTRSAPVTPT;VTPTQDTPPVLNK	R.SAPVTPTQDTPPVLNK.N	Connector enhancer of kinase suppressor of Ras 1, isoform CRA_a						0.025	0.036	0.098	0.09	0.085	0.098	0.112	0.179	0.147	0.056	0.073	0.102	0.099	0.105	0.098	0.111	0.102	0.077	0.079	0.081	0.074	0.073	0.029	0.04	0.116	0.099	0.106	0.113	0.097	0.159	0.134	0.047	0.06
3642	Form_4472	CNKSR1	cnksr1.L	gnl|gene44874|XL-9_2-gene44874|rna88983|	728	45.1	LENQNISGASSPT	K.TPLTQLENQNISGASSPTTTEEK.G	Connector enhancer of kinase suppressor of Ras 1, isoform CRA_a						0.019	0.013	0.053	0.071	0.121	0.128	0.168	0.158	0.238	0.01	0.022	0.102	0.099	0.105	0.098	0.111	0.102	0.077	0.079	0.081	0.074	0.073	0.022	0.014	0.062	0.078	0.15	0.146	0.145	0.14	0.216	0.008	0.018
368	Form__476	CNKSR2	cnksr2.L	gnl|gene1169|XL-9_2-gene1169|rna3394|	428;431	31.6	VSKGSESPNSFLD;GSESPNSFLDQEY	K.GSESPNSFLDQEYRK.H	Connector enhancer of kinase suppressor of ras 2						0.016	0.013	0.133	0.153	0.141	0.171	0.125	0.143	0.089	0.006	0.009	0.092	0.088	0.111	0.108	0.114	0.102	0.097	0.076	0.083	0.062	0.068	0.015	0.012	0.149	0.167	0.162	0.176	0.123	0.11	0.075	0.004	0.006
368	Form__477	CNKSR2	cnksr2.L	gnl|gene1169|XL-9_2-gene1169|rna3394|	426;428	42.4	KPVSKGSESPNSF;VSKGSESPNSFLD	K.GSESPNSFLDQEYR.K	Connector enhancer of kinase suppressor of ras 2						0.012	0.008	0.066	0.079	0.106	0.141	0.142	0.192	0.23	0.008	0.015	0.092	0.088	0.111	0.108	0.114	0.102	0.097	0.076	0.083	0.062	0.068	0.012	0.008	0.079	0.091	0.13	0.154	0.148	0.156	0.205	0.005	0.011
369	Form__475	CNKSR2	cnksr2.L	gnl|gene1169|XL-9_2-gene1169|rna3394|	978	18	SFIKRSSDPVVND	K.RSSDPVVNDK.L	Connector enhancer of kinase suppressor of ras 2						0.015	0.011	0.073	0.065	0.131	0.106	0.156	0.161	0.254	0.006	0.021	0.092	0.088	0.111	0.108	0.114	0.102	0.097	0.076	0.083	0.062	0.068	0.015	0.01	0.087	0.075	0.16	0.116	0.162	0.131	0.225	0.004	0.015
5188	Form_6354	CNN3	cnn3.S	gnl|gene9528|XL-9_2-gene9528|rna27719|	325	33.6	DYHGQYSDQGIDY	R.DYHGQYSDQGIDY.-	Calponin-3						0.122	0.03	0.145	0.112	0.138	0.12	0.102	0.081	0.135	0.003	0.011	0.087	0.082	0.095	0.089	0.09	0.091	0.097	0.104	0.108	0.083	0.076	0.113	0.026	0.146	0.106	0.132	0.116	0.105	0.089	0.155	0.003	0.009
4785	Form_5866	CNNM4	cnnm2.L	gnl|gene7820|XL-9_2-gene7820|rna22826|	506	51.6	SEILDESDLYTDN	K.SEILDESDLYTDNR.S	Metal transporter CNNM4	GN:CNNM4|CNNM4|human|Q6P4Q7	0	512	SEILDESDMYTDN	NaN	0.025	0.021	0.067	0.073	0.131	0.088	0.217	0.155	0.184	0.018	0.02	0.135	0.118	0.112	0.109	0.115	0.124	0.06	0.063	0.07	0.046	0.047	0.04	0.029	0.089	0.094	0.177	0.129	0.153	0.115	0.152	0.01	0.011
4786	Form_5867	CNNM4	cnnm2.L	gnl|gene7820|XL-9_2-gene7820|rna22826|	725	36.4	LDTSPQSPDGGTR	R.LDTSPQSPDGGTR.K	Metal transporter CNNM4						0.015	0.024	0.11	0.117	0.104	0.099	0.192	0.151	0.14	0.023	0.026	0.135	0.118	0.112	0.109	0.115	0.124	0.06	0.063	0.07	0.046	0.047	0.023	0.033	0.141	0.146	0.137	0.141	0.132	0.109	0.112	0.012	0.014
5065	Form_6195	CNOT1	cnot1.S	gnl|gene8877|XL-9_2-gene8877|rna25841|	1325	129.4	DQDRLKSLDEQLS	K.SLDEQLSAPK.K	CCR4-NOT transcription complex subunit 1						0.007	0.004	0.11	0.089	0.183	0.103	0.162	0.096	0.226	0.005	0.015	0.092	0.086	0.102	0.091	0.097	0.09	0.096	0.087	0.093	0.079	0.089	0.007	0.004	0.119	0.086	0.189	0.099	0.165	0.089	0.223	0.004	0.014
2781	Form_3420	CNOT10	cnot10.S	gnl|gene3645|XL-9_2-gene3645|rna10598|	524	17.7	QTVNTDSSGESSD	K.ASSQTVNTDSSGESSDVCSNK.N	CCR4-NOT transcription complex subunit 10						0.129	0.064	0.134	0.118	0.144	0.141	0.076	0.083	0.104	0.003	0.004	0.079	0.079	0.084	0.083	0.079	0.08	0.092	0.082	0.086	0.127	0.131	0.123	0.061	0.136	0.119	0.138	0.137	0.085	0.082	0.108	0.005	0.006
2162	Form_2644	CNOT2	cnot2.S	gnl|gene20475|XL-9_2-gene20475|rna59795|	75	78.1	RGMSNNTPQLNRS	R.GMSNNTPQLNR.S	CCR4-NOT transcription complex subunit 2	GN:CNOT2|NOT2|human|Q9NZN8	0	93	RGMSNNTPQLNRS	NaN	0.032	0.056	0.249	0.155	0.081	0.102	0.065	0.06	0.062	0.05	0.089	0.095	0.09	0.101	0.103	0.098	0.094	0.097	0.091	0.09	0.069	0.072	0.032	0.054	0.268	0.17	0.084	0.102	0.067	0.058	0.059	0.037	0.068
2163	Form_2645	CNOT2	cnot2.S	gnl|gene20475|XL-9_2-gene20475|rna59795|	139;145	140.7	SRTNNMSSSGLGS;SSSGLGSPNRSSP	R.TNNMSSSGLGSPNR.S	CCR4-NOT transcription complex subunit 2	GN:CNOT2|NOT2|human|Q9NZN8	0	159	SRTNSMSSSGLGS	NaN	0.027	0.033	0.179	0.13	0.151	0.151	0.102	0.1	0.105	0.01	0.012	0.095	0.09	0.101	0.103	0.098	0.094	0.097	0.091	0.09	0.069	0.072	0.027	0.031	0.188	0.139	0.154	0.148	0.103	0.095	0.098	0.007	0.009
2163	Form_2646	CNOT2	cnot2.S	gnl|gene20475|XL-9_2-gene20475|rna59795|	145	140.7	SSSGLGSPNRSSP	R.TNNMSSSGLGSPNR.S	CCR4-NOT transcription complex subunit 2	GN:CNOT2|NOT2|human|Q9NZN8	0	165	SSSGLGSPNRSSP	NaN	0.103	0.085	0.099	0.089	0.121	0.13	0.102	0.112	0.122	0.012	0.025	0.095	0.09	0.101	0.103	0.098	0.094	0.097	0.091	0.09	0.069	0.072	0.104	0.081	0.106	0.097	0.126	0.13	0.105	0.108	0.116	0.009	0.019
1139	Form_1414	CNOT4	cnot4.L	gnl|gene15372|XL-9_2-gene15372|rna44857|	469	18.8	QDQPSLSPTSVQN	K.ELSVQDQPSLSPTSVQNPNPHLAPK.G	CCR4-NOT transcription complex subunit 4						0.036	0.064	0.093	0.099	0.119	0.101	0.121	0.118	0.115	0.052	0.081	0.073	0.083	0.125	0.102	0.108	0.112	0.092	0.087	0.082	0.065	0.071	0.028	0.057	0.124	0.108	0.137	0.121	0.119	0.109	0.1	0.036	0.061
1216	Form_1510	CNTROB	LOC108711756	gnl|gene15776|XL-9_2-gene15776|rna46091|	173	24.4	LNARPVSPTRSLS	K.DEEQSDATTTLLNARPVSPTR.S	Centrobin						0.066	0.079	0.08	0.102	0.129	0.099	0.102	0.136	0.099	0.042	0.066	0.051	0.06	0.09	0.082	0.086	0.123	0.11	0.103	0.121	0.102	0.072	0.036	0.051	0.077	0.09	0.119	0.131	0.12	0.15	0.129	0.046	0.051
2369	Form_2927	COBLL1	cobll1.L	gnl|gene2711|XL-9_2-gene2711|rna7865|	338	17.7	PRDQTSSAPTTPQ	R.DQTSSAPTTPQLNK.A	Cordon-bleu protein-like 1						0.102	0.212	0.151	0.126	0.081	0.104	0.07	0.097	0.051	0	0.005	0.096	0.088	0.1	0.098	0.093	0.099	0.09	0.081	0.081	0.085	0.09	0.106	0.202	0.164	0.134	0.082	0.111	0.068	0.085	0.045	0	0.005
2369	Form_2928	COBLL1	cobll1.L	gnl|gene2711|XL-9_2-gene2711|rna7865|	342	36.4	TSSAPTTPQLNKA	R.DQTSSAPTTPQLNK.A	Cordon-bleu protein-like 1						0.135	0.212	0.127	0.11	0.083	0.11	0.062	0.099	0.051	0.003	0.007	0.096	0.088	0.1	0.098	0.093	0.099	0.09	0.081	0.081	0.085	0.09	0.14	0.202	0.137	0.117	0.083	0.118	0.06	0.087	0.045	0.003	0.007
2370	Form_2921	COBLL1	cobll1.L	gnl|gene2711|XL-9_2-gene2711|rna7865|	362	35.3	TNPVFKSYDSNTM	K.SYDSNTMPSMPSEVPK.K	Cordon-bleu protein-like 1						0.051	0.025	0.079	0.076	0.124	0.104	0.123	0.137	0.274	0	0.008	0.096	0.088	0.1	0.098	0.093	0.099	0.09	0.081	0.081	0.085	0.09	0.055	0.025	0.088	0.083	0.129	0.115	0.124	0.124	0.248	0	0.008
2371	Form_2917	COBLL1	cobll1.L	gnl|gene2711|XL-9_2-gene2711|rna7865|	454	31.7	KAPLPPSPPPNSS	K.APLPPSPPPNSSQDDNYANGNEK.A	Cordon-bleu protein-like 1						0.035	0.029	0.116	0.109	0.117	0.117	0.092	0.124	0.134	0.05	0.078	0.096	0.088	0.1	0.098	0.093	0.099	0.09	0.081	0.081	0.085	0.09	0.037	0.028	0.127	0.117	0.12	0.127	0.091	0.11	0.119	0.047	0.077
2372	Form_2920	COBLL1	cobll1.L	gnl|gene2711|XL-9_2-gene2711|rna7865|	759	72.3	TEKMVESPLKSPS	K.MVESPLKSPSK.I	Cordon-bleu protein-like 1						0.027	0.032	0.146	0.127	0.146	0.123	0.13	0.132	0.128	0.004	0.004	0.096	0.088	0.1	0.098	0.093	0.099	0.09	0.081	0.081	0.085	0.09	0.028	0.031	0.159	0.136	0.148	0.133	0.127	0.116	0.113	0.004	0.004
2373	Form_2929	COBLL1	cobll1.L	gnl|gene2711|XL-9_2-gene2711|rna7865|	767	55.5	LKSPSKSHQLYIQ	K.SHQLYIQDSEPK.P	Cordon-bleu protein-like 1						0.069	0.045	0.147	0.117	0.118	0.146	0.107	0.118	0.12	0.003	0.01	0.096	0.088	0.1	0.098	0.093	0.099	0.09	0.081	0.081	0.085	0.09	0.072	0.043	0.159	0.124	0.119	0.157	0.104	0.104	0.105	0.003	0.01
2374	Form_2923	COBLL1	cobll1.L	gnl|gene2711|XL-9_2-gene2711|rna7865|	839	5000	IGTKSVSPVQAAR	K.SVSPVQAAR.E	Cordon-bleu protein-like 1						0.061	0.049	0.115	0.121	0.124	0.103	0.1	0.111	0.106	0.043	0.067	0.096	0.088	0.1	0.098	0.093	0.099	0.09	0.081	0.081	0.085	0.09	0.064	0.047	0.126	0.13	0.126	0.111	0.098	0.098	0.094	0.04	0.066
2375	Form_2922	COBLL1	cobll1.L	gnl|gene2711|XL-9_2-gene2711|rna7865|	894	14.7	GLTRSLSSEPVLK	R.SLSSEPVLK.S	Cordon-bleu protein-like 1						0.048	0.024	0.085	0.143	0.125	0.182	0.097	0.156	0.131	0.002	0.006	0.096	0.088	0.1	0.098	0.093	0.099	0.09	0.081	0.081	0.085	0.09	0.05	0.023	0.093	0.153	0.127	0.197	0.095	0.138	0.116	0.002	0.006
2376	Form_2924	COBLL1	cobll1.L	gnl|gene2711|XL-9_2-gene2711|rna7865|	946	22	MSKSSSSPTNNTV	K.SSSSPTNNTVANLGK.D	Cordon-bleu protein-like 1						0.016	0.008	0.054	0.092	0.125	0.123	0.119	0.171	0.194	0.045	0.054	0.096	0.088	0.1	0.098	0.093	0.099	0.09	0.081	0.081	0.085	0.09	0.017	0.008	0.06	0.101	0.13	0.137	0.12	0.155	0.176	0.043	0.054
2377	Form_2931	COBLL1	cobll1.L	gnl|gene2711|XL-9_2-gene2711|rna7865|	1064	39	LDVRLPSISEDEL	R.LPSISEDELAK.D	Cordon-bleu protein-like 1						0.057	0.081	0.139	0.127	0.13	0.108	0.122	0.121	0.109	0.001	0.003	0.096	0.088	0.1	0.098	0.093	0.099	0.09	0.081	0.081	0.085	0.09	0.06	0.078	0.151	0.136	0.132	0.117	0.12	0.107	0.096	0.001	0.003
2378	Form_2930	COBLL1	cobll1.L	gnl|gene2711|XL-9_2-gene2711|rna7865|	1125	69.3	QEKHLESPTLSSK	K.HLESPTLSSK.N	Cordon-bleu protein-like 1						0.053	0.051	0.124	0.128	0.135	0.118	0.117	0.125	0.142	0.001	0.005	0.096	0.088	0.1	0.098	0.093	0.099	0.09	0.081	0.081	0.085	0.09	0.056	0.049	0.135	0.137	0.137	0.128	0.115	0.111	0.126	0.001	0.005
2379	Form_2918	COBLL1	cobll1.L	gnl|gene2711|XL-9_2-gene2711|rna7865|	1183;1186	26.8	SSRTVRSPSSPTG;TVRSPSSPTGPAV	R.TVRSPSSPTGPAVTMSLQK.L	Cordon-bleu protein-like 1						0.01	0.011	0.08	0.127	0.129	0.174	0.102	0.181	0.152	0.016	0.017	0.096	0.088	0.1	0.098	0.093	0.099	0.09	0.081	0.081	0.085	0.09	0.011	0.011	0.088	0.137	0.132	0.19	0.101	0.162	0.136	0.015	0.017
2379	Form_2925	COBLL1	cobll1.L	gnl|gene2711|XL-9_2-gene2711|rna7865|	1188	13.1	RSPSSPTGPAVTM	R.SPSSPTGPAVTMSLQK.L	Cordon-bleu protein-like 1						0.156	0.128	0.117	0.109	0.128	0.096	0.076	0.073	0.065	0.01	0.041	0.096	0.088	0.1	0.098	0.093	0.099	0.09	0.081	0.081	0.085	0.09	0.162	0.122	0.126	0.115	0.128	0.103	0.074	0.064	0.057	0.009	0.04
2379	Form_2926	COBLL1	cobll1.L	gnl|gene2711|XL-9_2-gene2711|rna7865|	1186	25.9	TVRSPSSPTGPAV	R.SPSSPTGPAVTMSLQK.L	Cordon-bleu protein-like 1						0.159	0.13	0.116	0.111	0.12	0.088	0.077	0.081	0.075	0.012	0.03	0.096	0.088	0.1	0.098	0.093	0.099	0.09	0.081	0.081	0.085	0.09	0.165	0.124	0.125	0.118	0.121	0.094	0.075	0.071	0.066	0.011	0.029
2380	Form_2919	COBLL1	cobll1.L	gnl|gene2711|XL-9_2-gene2711|rna7865|	1277	51.5	SEDQTLTPEIKYK	R.NYSSFSSENPQEQSEDQTLTPEIK.Y	Cordon-bleu protein-like 1						0.014	0.035	0.074	0.13	0.11	0.128	0.088	0.148	0.085	0.11	0.078	0.096	0.088	0.1	0.098	0.093	0.099	0.09	0.081	0.081	0.085	0.09	0.015	0.034	0.082	0.14	0.113	0.14	0.087	0.132	0.076	0.103	0.077
1633	Form_2006	COG5	cog5.L	gnl|gene17872|XL-9_2-gene17872|rna52228|	307	46.7	GRAAMPSPGNTAA	R.AAMPSPGNTAAFR.A	Conserved oligomeric Golgi complex subunit 5						0.009	0.011	0.106	0.104	0.123	0.134	0.111	0.129	0.169	0.044	0.06	0.106	0.092	0.096	0.106	0.103	0.1	0.089	0.084	0.079	0.074	0.07	0.011	0.011	0.112	0.122	0.139	0.148	0.109	0.119	0.147	0.036	0.046
1142	Form_1418	COG8	cog8.L	gnl|gene15413|XL-9_2-gene15413|rna44986|	555	23.4	DLTASDSVSHVQA	K.DTPDLTASDSVSHVQADR.V	Conserved oligomeric Golgi complex subunit 8						0.047	0.043	0.105	0.11	0.118	0.123	0.117	0.147	0.118	0.048	0.024	0.105	0.085	0.104	0.09	0.106	0.1	0.094	0.076	0.09	0.067	0.083	0.053	0.04	0.119	0.107	0.136	0.134	0.119	0.121	0.115	0.035	0.022
662	Form__831	COIL	coil.L	gnl|gene13145|XL-9_2-gene13145|rna38208|	115	128.6	KRHWKKSEDECDS	K.SEDECDSGHK.R	Coilin						0.1	0.064	0.125	0.109	0.108	0.109	0.109	0.123	0.119	0.014	0.021	0.085	0.082	0.099	0.098	0.103	0.107	0.096	0.095	0.092	0.073	0.068	0.089	0.055	0.13	0.112	0.117	0.123	0.11	0.123	0.115	0.011	0.015
663	Form__829	COIL	coil.L	gnl|gene13145|XL-9_2-gene13145|rna38208|	152;160	5000	RDKRKPSPPMECN;PMECNASDPEELR	K.RKPSPPMECNASDPEELR.E	Coilin						0.153	0.031	0.092	0.086	0.072	0.105	0.132	0.16	0.133	0.016	0.019	0.085	0.082	0.099	0.098	0.103	0.107	0.096	0.095	0.092	0.073	0.068	0.138	0.027	0.097	0.089	0.079	0.119	0.134	0.161	0.13	0.012	0.014
664	Form__830	COIL	coil.L	gnl|gene13145|XL-9_2-gene13145|rna38208|	330	38.4	IKKSNASLSSLTD	K.SNASLSSLTDNR.V	Coilin						0.006	0.008	0.111	0.15	0.123	0.17	0.112	0.173	0.139	0.001	0.007	0.085	0.082	0.099	0.098	0.103	0.107	0.096	0.095	0.092	0.073	0.068	0.005	0.007	0.112	0.15	0.129	0.185	0.109	0.167	0.13	0.001	0.005
581	Form__735	COPA	copa.L	gnl|gene12732|XL-9_2-gene12732|rna36999|	173	5000	LRKKNLSPGAVEA	K.NLSPGAVEADVR.G	Coatomer subunit alpha	GN:COPA|COPA|human|P53621	0	173	LRKKNLSPGAVES	NaN	0.019	0.013	0.059	0.08	0.098	0.13	0.106	0.147	0.205	0.078	0.065	0.078	0.076	0.078	0.081	0.084	0.084	0.091	0.089	0.089	0.129	0.122	0.016	0.011	0.05	0.071	0.09	0.119	0.105	0.143	0.199	0.109	0.086
582	Form__734	COPA	copa.L	gnl|gene12732|XL-9_2-gene12732|rna36999|	245	88	PPSTGQSPADMLR	R.MNDFAPPSTGQSPADMLR.E	Coatomer subunit alpha						0.008	0.006	0.063	0.091	0.095	0.134	0.118	0.183	0.204	0.04	0.057	0.078	0.076	0.078	0.081	0.084	0.084	0.091	0.089	0.089	0.129	0.122	0.007	0.005	0.055	0.082	0.089	0.125	0.119	0.181	0.202	0.058	0.077
3774	Form_4638	COQ9	coq9.S	gnl|gene46175|XL-9_2-gene46175|rna90819|	153	54.1	DQAGEESEDYESE	R.YTDQAGEESEDYESEEQLQQR.I	Ubiquinone biosynthesis protein COQ9, mitochondrial						0.094	0.071	0.09	0.101	0.101	0.125	0.121	0.133	0.135	0.011	0.018	0.099	0.094	0.109	0.098	0.105	0.098	0.089	0.084	0.083	0.067	0.075	0.099	0.071	0.105	0.105	0.113	0.131	0.115	0.119	0.119	0.008	0.014
3774	Form_4639	COQ9	coq9.S	gnl|gene46175|XL-9_2-gene46175|rna90819|	145	16	QQSPPRYTDQAGE	R.YTDQAGEESEDYESEEQLQQR.I	Ubiquinone biosynthesis protein COQ9, mitochondrial						0.025	0.056	0.098	0.104	0.11	0.132	0.117	0.167	0.141	0.028	0.022	0.099	0.094	0.109	0.098	0.105	0.098	0.089	0.084	0.083	0.067	0.075	0.027	0.057	0.115	0.11	0.125	0.14	0.112	0.151	0.126	0.02	0.018
3856	Form_4739	CPSF2	cpsf2.S	gnl|gene46940|XL-9_2-gene46940|rna91919|	383	99.3	LDSSDDSDVEEDI	K.EADLDSSDDSDVEEDIDQITSHK.A	Cleavage and polyadenylation specificity factor subunit 2						0.111	0.058	0.093	0.108	0.121	0.105	0.128	0.124	0.134	0.005	0.015	0.093	0.099	0.081	0.09	0.079	0.091	0.098	0.105	0.104	0.09	0.07	0.11	0.061	0.081	0.104	0.102	0.102	0.134	0.139	0.149	0.005	0.011
3856	Form_4740	CPSF2	cpsf2.S	gnl|gene46940|XL-9_2-gene46940|rna91919|	379;380;383	107.5	KEADLDSSDDSDV;EADLDSSDDSDVE;LDSSDDSDVEEDI	K.EADLDSSDDSDVEEDIDQITSHK.A	Cleavage and polyadenylation specificity factor subunit 2						0.108	0.035	0.089	0.074	0.127	0.103	0.143	0.133	0.165	0.007	0.016	0.093	0.099	0.081	0.09	0.079	0.091	0.098	0.105	0.104	0.09	0.07	0.107	0.037	0.077	0.071	0.107	0.1	0.15	0.149	0.183	0.007	0.012
4423	Form_5427	CRACDL	loc496296.L	gnl|gene5913|XL-9_2-gene5913|rna17318|	472	84	DEQGGGSDLDISL	K.SKDDEQGGGSDLDISLSR.T	CRACD-like protein (Fragment)						0.304	0.099	0.078	0.059	0.1	0.057	0.102	0.066	0.12	0.004	0.01	0.086	0.096	0.092	0.099	0.099	0.098	0.089	0.097	0.093	0.071	0.08	0.285	0.103	0.078	0.064	0.108	0.061	0.099	0.07	0.121	0.003	0.009
4423	Form_5428	CRACDL	loc496296.L	gnl|gene5913|XL-9_2-gene5913|rna17318|	472;477	84	DEQGGGSDLDISL;GSDLDISLSRTED	K.SKDDEQGGGSDLDISLSR.T	CRACD-like protein (Fragment)						0.008	0.003	0.096	0.12	0.163	0.132	0.149	0.158	0.156	0.007	0.008	0.086	0.096	0.092	0.099	0.099	0.098	0.089	0.097	0.093	0.071	0.08	0.007	0.003	0.093	0.125	0.17	0.136	0.14	0.162	0.153	0.005	0.007
4424	Form_5429	CRACDL	loc496296.L	gnl|gene5913|XL-9_2-gene5913|rna17318|	832	5000	NVINLQSPELKEN	K.RNVINLQSPELK.E	CRACD-like protein (Fragment)						0.007	0.003	0.05	0.074	0.096	0.116	0.132	0.171	0.181	0.084	0.085	0.086	0.096	0.092	0.099	0.099	0.098	0.089	0.097	0.093	0.071	0.08	0.007	0.003	0.05	0.08	0.104	0.124	0.128	0.181	0.184	0.065	0.074
5099	Form_6236	CRAMP1	cramp1.L	gnl|gene9016|XL-9_2-gene9016|rna26252|	104	47	KRLRKDSCSDGAG	K.DSCSDGAGTSTK.S	Protein cramped-like						0.071	0.088	0.107	0.096	0.112	0.13	0.124	0.141	0.118	0.001	0.011	0.104	0.098	0.111	0.108	0.097	0.087	0.083	0.078	0.079	0.081	0.073	0.08	0.094	0.129	0.113	0.118	0.123	0.112	0.119	0.101	0.001	0.009
1280	Form_1581	CRP	LOC108699321	gnl|gene16123|XL-9_2-gene16123|rna47136|	185	15.7	WDRVLTSQELMQA	R.VLTSQELMQALYNK.D	C-reactive protein						0.106	0.092	0.113	0.121	0.134	0.133	0.07	0.079	0.087	0.024	0.042	0.083	0.087	0.076	0.083	0.087	0.084	0.102	0.098	0.105	0.097	0.098	0.099	0.09	0.097	0.113	0.132	0.126	0.081	0.087	0.103	0.026	0.046
3780	Form_4647	CRYBG1	aim1.S	gnl|gene4622|XL-9_2-gene4622|rna13479|	611	16.9	SGSIPASPTARKA	K.ENQSGSIPASPTAR.K	Beta/gamma crystallin domain-containing protein 1						0.092	0.079	0.091	0.118	0.098	0.117	0.102	0.13	0.096	0.028	0.048	0.092	0.086	0.109	0.099	0.102	0.099	0.09	0.083	0.089	0.072	0.079	0.091	0.073	0.107	0.126	0.108	0.125	0.099	0.116	0.092	0.022	0.041
3996	Form_4906	CRYBG1	aim1.L	gnl|gene4831|XL-9_2-gene4831|rna14116|	553;558	49.7	SKPLPLSPDTTSP;LSPDTTSPLSANQ	K.PLPLSPDTTSPLSANQDVR.A	Beta/gamma crystallin domain-containing protein 1						0.011	0.014	0.094	0.086	0.096	0.095	0.129	0.135	0.114	0.133	0.093	0.089	0.099	0.098	0.094	0.098	0.105	0.084	0.091	0.081	0.081	0.08	0.011	0.016	0.103	0.09	0.105	0.111	0.121	0.137	0.103	0.12	0.083
3996	Form_4907	CRYBG1	aim1.L	gnl|gene4831|XL-9_2-gene4831|rna14116|	553	49.7	SKPLPLSPDTTSP	K.PLPLSPDTTSPLSANQDVR.A	Beta/gamma crystallin domain-containing protein 1						0.007	0.012	0.093	0.101	0.1	0.097	0.121	0.129	0.14	0.112	0.089	0.089	0.099	0.098	0.094	0.098	0.105	0.084	0.091	0.081	0.081	0.08	0.007	0.013	0.101	0.106	0.109	0.114	0.113	0.131	0.126	0.101	0.079
3996	Form_4908	CRYBG1	aim1.L	gnl|gene4831|XL-9_2-gene4831|rna14116|	558	47.1	LSPDTTSPLSANQ	K.PLPLSPDTTSPLSANQDVR.A	Beta/gamma crystallin domain-containing protein 1						0.025	0.006	0.093	0.079	0.122	0.094	0.115	0.109	0.149	0.117	0.09	0.089	0.099	0.098	0.094	0.098	0.105	0.084	0.091	0.081	0.081	0.08	0.025	0.007	0.102	0.083	0.133	0.11	0.108	0.111	0.135	0.106	0.08
1447	Form_1779	CSDE1	csde1.L	gnl|gene16932|XL-9_2-gene16932|rna49475|	157	111.9	HNLETKSPAAPGQ	K.SPAAPGQSPSGSVCYER.N	Cold shock domain-containing protein E1	GN:CSDE1|CSDE1|human|O75534	0	116	HNLESKSPAAPGQ	NaN	0.025	0.029	0.172	0.089	0.126	0.075	0.077	0.075	0.224	0.021	0.086	0.093	0.092	0.091	0.094	0.093	0.086	0.094	0.094	0.09	0.086	0.087	0.026	0.029	0.172	0.092	0.129	0.071	0.079	0.077	0.221	0.02	0.082
1758	Form_2165	CSDE1	csde1.S	gnl|gene18464|XL-9_2-gene18464|rna53923|	798	36.8	LVNRLKSITLDDT	K.SITLDDTSAPR.L	Cold shock domain-containing protein E1						0.091	0.057	0.127	0.173	0.138	0.158	0.077	0.091	0.081	0.002	0.004	0.063	0.062	0.082	0.071	0.072	0.077	0.108	0.115	0.104	0.117	0.129	0.07	0.043	0.127	0.149	0.121	0.148	0.101	0.127	0.102	0.003	0.007
1783	Form_2197	CSE1L	cse1l.L	gnl|gene18548|XL-9_2-gene18548|rna54157|	415	44.3	EAFEDNSEEYIRR	R.AADEEAFEDNSEEYIRR.D	Exportin-2	GN:CSE1L|Exportin-2|human|P55060	0	366	EAFEDNSEEYIRR	NaN	0.105	0.081	0.105	0.098	0.103	0.107	0.11	0.127	0.131	0.019	0.015	0.096	0.097	0.098	0.101	0.1	0.099	0.089	0.086	0.084	0.074	0.075	0.108	0.084	0.11	0.106	0.111	0.114	0.105	0.117	0.118	0.015	0.012
2226	Form_2728	CSNK1E	csnk1e.L	gnl|gene2337|XL-9_2-gene2337|rna6801|	389	38	GAPANVSSSDLTG	R.GAPANVSSSDLTGR.Q	Casein kinase I isoform epsilon	GN:CSNK1E|CK1E|human|P49674	0	389	GAPANVSSSDLTG	1	0.062	0.054	0.131	0.096	0.118	0.139	0.108	0.142	0.138	0.005	0.007	0.039	0.05	0.045	0.057	0.069	0.069	0.079	0.089	0.11	0.243	0.15	0.033	0.037	0.081	0.075	0.112	0.132	0.117	0.173	0.209	0.016	0.015
4435	Form_5443	CSTF2	cstf2.L	gnl|gene5997|XL-9_2-gene5997|rna17546|	154	5000	KLCVQNSPQEARN	K.LCVQNSPQEAR.N	Cleavage stimulation factor subunit 2	GN:CSTF2|CSTF2|human|P33240	0	154	KLCVQNSPQEARN	NaN	0.019	0.02	0.107	0.12	0.118	0.137	0.102	0.124	0.155	0.04	0.056	0.099	0.094	0.101	0.102	0.096	0.094	0.094	0.087	0.083	0.074	0.077	0.021	0.021	0.118	0.134	0.124	0.141	0.105	0.118	0.14	0.032	0.047
4436	Form_5442	CSTF2	cstf2.L	gnl|gene5997|XL-9_2-gene5997|rna17546|	472	14.1	PGQSQVTPQDHEK	R.QVPGIQGASAQGGFSPGQSQVTPQDHEK.A	Cleavage stimulation factor subunit 2	GN:CSTF2|CSTF2|human|P33240	0	531	PGQNQVTPQDHEK	NaN	0.043	0.056	0.054	0.061	0.1	0.12	0.142	0.197	0.142	0.041	0.042	0.099	0.094	0.101	0.102	0.096	0.094	0.094	0.087	0.083	0.074	0.077	0.047	0.058	0.06	0.069	0.106	0.124	0.147	0.189	0.13	0.033	0.036
4269	Form_5240	CSTF3	cstf3.S	gnl|gene5143|XL-9_2-gene5143|rna15044|	692	5000	KRPNEDSDDEEEK	K.RPNEDSDDEEEK.G	Cleavage stimulation factor subunit 3	GN:CSTF3|CstF-77|human|Q12996	0	691	KRPNEDSDEDEEK	NaN	0.059	0.069	0.119	0.104	0.103	0.126	0.132	0.107	0.129	0.023	0.029	0.087	0.084	0.091	0.097	0.1	0.105	0.081	0.099	0.089	0.087	0.08	0.056	0.063	0.117	0.109	0.112	0.143	0.116	0.115	0.124	0.022	0.025
5101	Form_6238	CTDSPL2	LOC108712450	gnl|gene9054|XL-9_2-gene9054|rna26346|	45;48	100.9	KRVQPKSPCTPAG;QPKSPCTPAGTFG	K.SPCTPAGTFGK.K	CTD small phosphatase-like protein 2						0.006	0.017	0.137	0.127	0.117	0.132	0.144	0.153	0.154	0.004	0.009	0.066	0.059	0.075	0.077	0.116	0.106	0.099	0.102	0.115	0.103	0.083	0.004	0.01	0.105	0.1	0.139	0.143	0.146	0.16	0.181	0.004	0.008
4763	Form_5842	CTNNA1	ctnna1.L	gnl|gene7711|XL-9_2-gene7711|rna22519|	638	68.7	PEELDDSDFETED	R.TPEELDDSDFETEDFDVR.S	Catenin alpha-1						0.181	0.11	0.108	0.106	0.082	0.094	0.084	0.099	0.123	0.006	0.008	0.09	0.081	0.082	0.087	0.091	0.091	0.088	0.089	0.093	0.106	0.102	0.184	0.101	0.1	0.104	0.084	0.097	0.084	0.1	0.129	0.007	0.009
4763	Form_5843	CTNNA1	ctnna1.L	gnl|gene7711|XL-9_2-gene7711|rna22519|	638;649	85.2	PEELDDSDFETED;EDFDVRSRTSVQT	R.TPEELDDSDFETEDFDVRSR.T	Catenin alpha-1	GN:CTNNA1|CTNNA1|human|P35221	0	641	PEELDDSDFETED	2	0.075	0.04	0.104	0.112	0.128	0.132	0.122	0.131	0.141	0.007	0.009	0.09	0.081	0.082	0.087	0.091	0.091	0.088	0.089	0.093	0.106	0.102	0.076	0.036	0.096	0.11	0.131	0.135	0.121	0.131	0.147	0.008	0.01
4763	Form_5844	CTNNA1	ctnna1.L	gnl|gene7711|XL-9_2-gene7711|rna22519|	649	85.2	EDFDVRSRTSVQT	R.TPEELDDSDFETEDFDVRSR.T	Catenin alpha-1	GN:CTNNA1|CTNNA1|human|P35221	0	652	EDFDVRSRTSVQT	NaN	0.039	0.032	0.078	0.125	0.122	0.135	0.163	0.161	0.116	0.007	0.022	0.09	0.081	0.082	0.087	0.091	0.091	0.088	0.089	0.093	0.106	0.102	0.039	0.029	0.072	0.122	0.124	0.138	0.161	0.161	0.121	0.008	0.025
3413	Form_4199	CTNNA2	LOC108706501	gnl|gene42786|XL-9_2-gene42786|rna85838|	666;669	71.7	DVRSRTSVQTEDD;SRTSVQTEDDQLI	R.TSVQTEDDQLIAGQSAR.A	Catenin alpha-2						0.02	0.017	0.095	0.111	0.098	0.139	0.089	0.163	0.13	0.06	0.077	0.087	0.085	0.078	0.099	0.099	0.09	0.102	0.084	0.089	0.101	0.087	0.019	0.016	0.081	0.121	0.107	0.137	0.1	0.15	0.127	0.067	0.074
3413	Form_4200	CTNNA2	LOC108706501	gnl|gene42786|XL-9_2-gene42786|rna85838|	666	32.3	DVRSRTSVQTEDD	R.TSVQTEDDQLIAGQSAR.A	Catenin alpha-2	GN:CTNNA2|CTNNA2|human|P26232	0	654	DVRSRTSVQTEDD	NaN	0.083	0.038	0.152	0.111	0.115	0.126	0.106	0.118	0.136	0.006	0.008	0.087	0.085	0.078	0.099	0.099	0.09	0.102	0.084	0.089	0.101	0.087	0.08	0.036	0.131	0.122	0.126	0.126	0.12	0.11	0.134	0.007	0.008
3413	Form_4201	CTNNA2	LOC108706501	gnl|gene42786|XL-9_2-gene42786|rna85838|	669	71.7	SRTSVQTEDDQLI	R.SRTSVQTEDDQLIAGQSAR.A	Catenin alpha-2	GN:CTNNA2|CTNNA2|human|P26232	0	657	SRTSVQTEDDQLI	NaN	0.048	0.027	0.099	0.09	0.107	0.128	0.115	0.163	0.198	0.008	0.018	0.087	0.085	0.078	0.099	0.099	0.09	0.102	0.084	0.089	0.101	0.087	0.046	0.025	0.085	0.098	0.117	0.127	0.13	0.151	0.195	0.009	0.017
4378	Form_5376	CTPS1	ctps1.S	gnl|gene5660|XL-9_2-gene5660|rna16580|	574;575	41.8	SDRSENSSPDAEI;DRSENSSPDAEIA	R.SENSSPDAEIAELK.L	CTP synthase 1						0.102	0.071	0.104	0.115	0.114	0.134	0.099	0.13	0.122	0.003	0.005	0.096	0.098	0.094	0.089	0.09	0.091	0.082	0.083	0.078	0.1	0.099	0.11	0.079	0.11	0.116	0.116	0.138	0.092	0.122	0.107	0.003	0.006
4378	Form_5377	CTPS1	ctps1.S	gnl|gene5660|XL-9_2-gene5660|rna16580|	571	24.1	DTYSDRSENSSPD	R.DTYSDRSENSSPDAEIAELK.L	CTP synthase 1						0.094	0.055	0.083	0.099	0.106	0.14	0.107	0.155	0.153	0.003	0.006	0.096	0.098	0.094	0.089	0.09	0.091	0.082	0.083	0.078	0.1	0.099	0.103	0.061	0.089	0.1	0.109	0.145	0.1	0.147	0.136	0.003	0.007
1321	Form_1629	CTR9	ctr9.S	gnl|gene16221|XL-9_2-gene16221|rna47394|	1037;1039	5000	EGHARDSDSDDGP;HARDSDSDDGPRK	K.IADEGHARDSDSDDGPRK.S	RNA polymerase-associated protein CTR9 homolog (Fragment)						0.15	0.018	0.15	0.181	0.12	0.176	0.068	0.061	0.069	0.003	0.004	0.078	0.09	0.07	0.06	0.094	0.066	0.112	0.11	0.11	0.095	0.114	0.146	0.02	0.131	0.135	0.14	0.145	0.095	0.084	0.095	0.003	0.005
1322	Form_1630	CTR9	ctr9.S	gnl|gene16221|XL-9_2-gene16221|rna47394|	1052;1054;1056	5000	SQKRVISDSDSDN;KRVISDSDSDNGN;VISDSDSDNGNKS	K.RVISDSDSDNGNK.S	RNA polymerase-associated protein CTR9 homolog (Fragment)						0.079	0.03	0.185	0.135	0.133	0.163	0.094	0.074	0.099	0.003	0.005	0.078	0.09	0.07	0.06	0.094	0.066	0.112	0.11	0.11	0.095	0.114	0.074	0.032	0.155	0.097	0.15	0.129	0.126	0.097	0.13	0.003	0.007
1323	Form_1628	CTR9	ctr9.S	gnl|gene16221|XL-9_2-gene16221|rna47394|	1142	59.8	RASGNQSEQEVEK	R.ASGNQSEQEVEK.S	RNA polymerase-associated protein CTR9 homolog (Fragment)						0.076	0.077	0.178	0.152	0.119	0.165	0.074	0.072	0.082	0.001	0.004	0.078	0.09	0.07	0.06	0.094	0.066	0.112	0.11	0.11	0.095	0.114	0.072	0.084	0.151	0.111	0.136	0.132	0.101	0.096	0.109	0.001	0.006
1677	Form_2060	CTR9	ctr9.L	gnl|gene18099|XL-9_2-gene18099|rna52898|	890;897	173.9	KTRNLLSFTGEME;FTGEMETPKEKKQ	R.NLLSFTGEMETPK.E	RNA polymerase-associated protein CTR9 homolog (Fragment)						0.005	0.005	0.156	0.139	0.097	0.119	0.177	0.177	0.1	0.012	0.013	0.094	0.092	0.097	0.095	0.095	0.096	0.094	0.091	0.086	0.077	0.082	0.005	0.005	0.162	0.142	0.099	0.123	0.178	0.173	0.092	0.01	0.011
1677	Form_2061	CTR9	ctr9.L	gnl|gene18099|XL-9_2-gene18099|rna52898|	890	25.8	KTRNLLSFTGEME	R.NLLSFTGEMETPK.E	RNA polymerase-associated protein CTR9 homolog (Fragment)						0.004	0.009	0.05	0.082	0.133	0.152	0.155	0.216	0.177	0.011	0.011	0.094	0.092	0.097	0.095	0.095	0.096	0.094	0.091	0.086	0.077	0.082	0.004	0.009	0.053	0.084	0.137	0.158	0.158	0.213	0.165	0.009	0.01
1677	Form_2062	CTR9	ctr9.L	gnl|gene18099|XL-9_2-gene18099|rna52898|	897	173.9	FTGEMETPKEKKQ	R.NLLSFTGEMETPK.E	RNA polymerase-associated protein CTR9 homolog (Fragment)						0.014	0.025	0.279	0.192	0.12	0.123	0.083	0.058	0.055	0.016	0.036	0.094	0.092	0.097	0.095	0.095	0.096	0.094	0.091	0.086	0.077	0.082	0.014	0.024	0.288	0.194	0.121	0.125	0.083	0.056	0.05	0.013	0.031
1678	Form_2059	CTR9	ctr9.L	gnl|gene18099|XL-9_2-gene18099|rna52898|	927	5000	EFVNDDSDEELAP	K.NGEFEEFVNDDSDEELAPR.K	RNA polymerase-associated protein CTR9 homolog (Fragment)						0.115	0.08	0.099	0.109	0.126	0.12	0.107	0.123	0.109	0.002	0.009	0.094	0.092	0.097	0.095	0.095	0.096	0.094	0.091	0.086	0.077	0.082	0.116	0.079	0.103	0.111	0.128	0.124	0.108	0.12	0.101	0.002	0.008
3232	Form_3982	CTTN	cttn.L	gnl|gene41168|XL-9_2-gene41168|rna83496|	269	5000	MDKAAASFEDVEK	K.AAASFEDVEK.V	Src substrate cortactin						0.023	0.025	0.036	0.083	0.089	0.177	0.126	0.296	0.134	0.005	0.006	0.115	0.106	0.119	0.097	0.091	0.093	0.078	0.082	0.081	0.069	0.069	0.03	0.03	0.049	0.091	0.092	0.187	0.112	0.276	0.123	0.004	0.005
3233	Form_3979	CTTN	cttn.L	gnl|gene41168|XL-9_2-gene41168|rna83496|	372;376	5000	ENAKPPTPPASPK;PPTPPASPKASVK	K.QEEEENAKPPTPPASPK.A	Src substrate cortactin						0.083	0.061	0.097	0.109	0.122	0.134	0.118	0.131	0.126	0.008	0.011	0.115	0.106	0.119	0.097	0.091	0.093	0.078	0.082	0.081	0.069	0.069	0.102	0.07	0.124	0.114	0.119	0.134	0.099	0.115	0.11	0.006	0.008
3233	Form_3981	CTTN	cttn.L	gnl|gene41168|XL-9_2-gene41168|rna83496|	372	5000	ENAKPPTPPASPK	K.QEEEENAKPPTPPASPK.A	Src substrate cortactin						0.029	0.02	0.004	0.006	0.005	0.006	0.004	0.011	0.011	0.407	0.498	0.115	0.106	0.119	0.097	0.091	0.093	0.078	0.082	0.081	0.069	0.069	0.046	0.029	0.007	0.008	0.006	0.008	0.004	0.012	0.012	0.39	0.477
3234	Form_3980	CTTN	cttn.L	gnl|gene41168|XL-9_2-gene41168|rna83496|	393	55.7	PIYEDASPVYERE	K.VPESPIYEDASPVYEREPHR.A	Src substrate cortactin						0.005	0.005	0.057	0.067	0.115	0.173	0.141	0.2	0.209	0.016	0.011	0.115	0.106	0.119	0.097	0.091	0.093	0.078	0.082	0.081	0.069	0.069	0.006	0.006	0.078	0.075	0.12	0.184	0.126	0.188	0.194	0.013	0.009
2123	Form_2599	CTU2	ctu2.L	gnl|gene20249|XL-9_2-gene20249|rna59116|	201	27	EVTDSDSPGSSDK	R.LEVTDSDSPGSSDK.M	Cytoplasmic tRNA 2-thiolation protein 2						0.01	0.01	0.061	0.119	0.129	0.181	0.111	0.164	0.197	0.005	0.013	0.074	0.086	0.092	0.075	0.084	0.093	0.1	0.106	0.111	0.096	0.083	0.008	0.009	0.059	0.093	0.113	0.176	0.116	0.182	0.228	0.005	0.011
4856	Form_5950	CUL4B	cul4b.L	gnl|gene8002|XL-9_2-gene8002|rna23333|	15	14.4	MKDLIASPSGQSK	K.DLIASPSGQSK.Q	Cullin-4B						0.11	0.068	0.149	0.125	0.119	0.117	0.093	0.086	0.11	0.008	0.015	0.081	0.083	0.077	0.08	0.085	0.09	0.098	0.107	0.097	0.104	0.098	0.101	0.064	0.13	0.114	0.115	0.12	0.103	0.105	0.121	0.009	0.017
4857	Form_5948	CUL4B	cul4b.L	gnl|gene8002|XL-9_2-gene8002|rna23333|	61	5000	DDLDPLSPPRNSS	K.DDLDPLSPPR.N	Cullin-4B						0.112	0.066	0.114	0.12	0.115	0.111	0.075	0.091	0.086	0.038	0.072	0.081	0.083	0.077	0.08	0.085	0.09	0.098	0.107	0.097	0.104	0.098	0.102	0.061	0.098	0.108	0.11	0.112	0.082	0.109	0.094	0.044	0.079
4858	Form_5949	CUL4B	cul4b.L	gnl|gene8002|XL-9_2-gene8002|rna23333|	119	50.9	SKNLLISPVGVGH	K.NLLISPVGVGHHANGLTK.A	Cullin-4B						0.01	0.012	0.092	0.114	0.128	0.122	0.123	0.124	0.13	0.08	0.064	0.081	0.083	0.077	0.08	0.085	0.09	0.098	0.107	0.097	0.104	0.098	0.009	0.011	0.077	0.099	0.118	0.119	0.13	0.143	0.136	0.09	0.068
4266	Form_5237	CUL9	cul9.L	gnl|gene5133|XL-9_2-gene5133|rna15018|	64	23.3	RGNGAVSQTESKT	R.GNGAVSQTESK.T	Cullin-9						0.057	0.058	0.118	0.061	0.111	0.112	0.117	0.131	0.206	0.01	0.019	0.092	0.097	0.092	0.095	0.097	0.101	0.088	0.091	0.083	0.082	0.081	0.057	0.062	0.119	0.063	0.118	0.124	0.113	0.13	0.187	0.009	0.017
4267	Form_5239	CUL9	cul9.L	gnl|gene5133|XL-9_2-gene5133|rna15018|	591	161	HSFLKESPVQGGL	K.ESPVQGGLQSK.K	Cullin-9						0.077	0.043	0.105	0.095	0.116	0.127	0.121	0.132	0.157	0.01	0.017	0.092	0.097	0.092	0.095	0.097	0.101	0.088	0.091	0.083	0.082	0.081	0.077	0.045	0.105	0.098	0.122	0.139	0.116	0.131	0.142	0.009	0.015
4268	Form_5238	CUL9	cul9.L	gnl|gene5133|XL-9_2-gene5133|rna15018|	1938	5000	AHISFQSPGRKRP	K.AHISFQSPGR.K	Cullin-9						0.109	0.075	0.111	0.12	0.126	0.104	0.118	0.105	0.124	0.003	0.006	0.092	0.097	0.092	0.095	0.097	0.101	0.088	0.091	0.083	0.082	0.081	0.108	0.079	0.11	0.123	0.132	0.113	0.112	0.103	0.111	0.003	0.005
4995	Form_6113	CWF19L1	cwf19l1.L	gnl|gene8564|XL-9_2-gene8564|rna24914|	283	69.9	KSKGNKSAEEEEP	K.SAEEEEPTQQFFFDLNK.P	CWF19-like protein 1						0.109	0.074	0.094	0.1	0.091	0.109	0.119	0.148	0.14	0.007	0.009	0.09	0.087	0.092	0.093	0.096	0.097	0.089	0.092	0.084	0.091	0.089	0.108	0.071	0.095	0.102	0.096	0.116	0.116	0.149	0.129	0.007	0.009
4011	Form_4929	CXADR	cxadr.L	gnl|gene48522|XL-9_2-gene48522|rna94124|	336	34.8	PSQAPNSVPSKVA	K.IPNEEFERPPSQAPNSVPSK.V	Coxsackievirus and adenovirus receptor						0.013	0.009	0.123	0.124	0.085	0.141	0.13	0.18	0.169	0.011	0.013	0.085	0.081	0.102	0.096	0.104	0.104	0.09	0.089	0.093	0.078	0.078	0.012	0.008	0.132	0.125	0.093	0.154	0.123	0.168	0.165	0.009	0.011
1046	Form_1291	CYLD	LOC108719447	gnl|gene14795|XL-9_2-gene14795|rna43163|	454	15.9	KDLEPETPSRDNN	K.DLEPETPSRDNNPDVMEK.I	Ubiquitin carboxyl-terminal hydrolase CYLD						0.005	0.01	0.2	0.137	0.092	0.14	0.102	0.109	0.114	0.031	0.06	0.09	0.091	0.098	0.088	0.1	0.098	0.088	0.088	0.091	0.081	0.087	0.005	0.01	0.212	0.13	0.099	0.148	0.097	0.104	0.112	0.027	0.056
4793	Form_5874	CYP20A1	cyp20a1.L	gnl|gene7843|XL-9_2-gene7843|rna22878|	218	26.4	DGSIERSPSRKKL	K.GFLDGSIERSPSRK.K	Cytochrome P450 20A1						0.07	0.062	0.07	0.084	0.099	0.096	0.103	0.126	0.127	0.061	0.101	0.095	0.094	0.098	0.096	0.095	0.097	0.091	0.088	0.089	0.079	0.079	0.073	0.064	0.076	0.089	0.104	0.103	0.103	0.122	0.124	0.053	0.088
2288	Form_2807	CYP4V2	cyp4v2.S	gnl|gene2490|XL-9_2-gene2490|rna7253|	282	51.6	KKGHFDSDPESEK	K.GHFDSDPESEK.P	Cytochrome P450 4V2						0.068	0.02	0.115	0.08	0.11	0.158	0.117	0.129	0.168	0.014	0.02	0.085	0.081	0.078	0.095	0.098	0.092	0.099	0.093	0.092	0.091	0.095	0.063	0.018	0.098	0.083	0.118	0.159	0.126	0.131	0.169	0.014	0.021
855	Form_1050	DACT1	dact1.L	gnl|gene13956|XL-9_2-gene13956|rna40625|	342	14.7	RTNKPRTSVNADP	K.PRTSVNADPGK.G	Dapper homolog 1	GN:DACT1|DACT1|human|Q9NYF0	0	360	RTNKPRTSVNADP	NaN	0.023	0.023	0.145	0.098	0.118	0.16	0.144	0.148	0.129	0.003	0.009	0.094	0.111	0.081	0.105	0.095	0.084	0.081	0.084	0.08	0.095	0.089	0.025	0.03	0.135	0.119	0.129	0.155	0.134	0.143	0.119	0.003	0.009
292	Form__381	DAP	dap.S	gnl|gene11403|XL-9_2-gene11403|rna33138|	33	73.8	VQKHPHSPHVETK	K.HPHSPHVETK.E	Death-associated protein 1						0.029	0.025	0.108	0.089	0.106	0.099	0.107	0.08	0.141	0.105	0.111	0.1	0.091	0.096	0.092	0.093	0.102	0.093	0.086	0.098	0.074	0.076	0.032	0.025	0.114	0.09	0.109	0.112	0.11	0.076	0.153	0.086	0.093
2522	Form_3111	DAPL1	dapl1.S	gnl|gene3365|XL-9_2-gene3365|rna9777|	10	31.4	ELKVQSSPQALKA	K.VQSSPQALK.A	Death-associated protein-like 1						0.037	0.028	0.116	0.106	0.102	0.113	0.135	0.146	0.122	0.042	0.052	0.103	0.121	0.1	0.097	0.107	0.097	0.071	0.07	0.082	0.076	0.078	0.043	0.039	0.132	0.117	0.124	0.124	0.109	0.116	0.114	0.036	0.046
2523	Form_3112	DAPL1	dapl1.S	gnl|gene3365|XL-9_2-gene3365|rna9777|	39	5000	QGNDENSAPEKNA	K.KQGNDENSAPEK.N	Death-associated protein-like 1						0.023	0.041	0.103	0.079	0.101	0.133	0.146	0.182	0.177	0.005	0.012	0.103	0.121	0.1	0.097	0.107	0.097	0.071	0.07	0.082	0.076	0.078	0.027	0.056	0.117	0.087	0.123	0.147	0.118	0.145	0.165	0.004	0.011
2524	Form_3113	DAPL1	dapl1.S	gnl|gene3365|XL-9_2-gene3365|rna9777|	55	15.1	LQEKPSSVLNMTK	K.PSSVLNMTK.M	Death-associated protein-like 1						0.136	0.166	0.098	0.103	0.08	0.089	0.124	0.13	0.065	0.005	0.005	0.103	0.121	0.1	0.097	0.107	0.097	0.071	0.07	0.082	0.076	0.078	0.147	0.211	0.103	0.105	0.09	0.091	0.093	0.096	0.056	0.004	0.004
1616	Form_1988	DAXX	daxx.L	gnl|gene17769|XL-9_2-gene17769|rna51933|	34	52.3	KTCQLLSPEINGK	K.TCQLLSPEINGK.K	Death domain-associated protein 6						0.041	0.03	0.076	0.128	0.108	0.125	0.133	0.134	0.109	0.052	0.063	0.101	0.094	0.116	0.086	0.099	0.085	0.084	0.089	0.094	0.074	0.077	0.046	0.031	0.098	0.122	0.118	0.118	0.124	0.132	0.114	0.043	0.054
1617	Form_1989	DAXX	daxx.L	gnl|gene17769|XL-9_2-gene17769|rna51933|	524	27.2	QSTLLSSHEKMSK	K.NESLIQSTLLSSHEK.M	Death domain-associated protein 6						0.015	0.011	0.04	0.101	0.106	0.158	0.137	0.201	0.204	0.01	0.018	0.101	0.094	0.116	0.086	0.099	0.085	0.084	0.089	0.094	0.074	0.077	0.017	0.011	0.052	0.096	0.116	0.149	0.127	0.198	0.212	0.008	0.015
1618	Form_1990	DAXX	daxx.L	gnl|gene17769|XL-9_2-gene17769|rna51933|	838	15.9	LKNGDGSFSGAEK	K.NGDGSFSGAEK.E	Death domain-associated protein 6						0.01	0.02	0.086	0.089	0.118	0.129	0.164	0.169	0.192	0.007	0.017	0.101	0.094	0.116	0.086	0.099	0.085	0.084	0.089	0.094	0.074	0.077	0.011	0.02	0.108	0.083	0.127	0.119	0.15	0.164	0.197	0.006	0.014
212	Form__269	DAZAP1	dazap1.L	gnl|gene10997|XL-9_2-gene10997|rna31967|	202	21.4	RDSKSQTPGPPGS	K.SQTPGPPGSNQWGGR.A	DAZ-associated protein 1						0.003	0.009	0.184	0.112	0.089	0.12	0.114	0.123	0.102	0.058	0.085	0.089	0.083	0.093	0.103	0.095	0.097	0.091	0.093	0.095	0.085	0.076	0.003	0.008	0.185	0.124	0.091	0.126	0.112	0.123	0.105	0.053	0.07
4522	Form_5546	DAZAP1	dazap1.S	gnl|gene6419|XL-9_2-gene6419|rna18791|	198	27.6	RDSKSQTPGPPGS	K.SQTPGPPGSNQWGSR.A	DAZ-associated protein 1						0.035	0.028	0.166	0.109	0.083	0.102	0.098	0.124	0.103	0.065	0.087	0.098	0.098	0.088	0.1	0.107	0.094	0.093	0.077	0.096	0.072	0.077	0.038	0.031	0.162	0.121	0.099	0.106	0.101	0.106	0.11	0.052	0.074
3612	Form_4436	DBF4B	dbf4b.L	gnl|gene44626|XL-9_2-gene44626|rna88627|	660;663	5000	KRKHWDSLLSPPG;HWDSLLSPPGKRP	K.HWDSLLSPPGK.R	Protein DBF4 homolog B						0.035	0.03	0.163	0.154	0.135	0.157	0.122	0.108	0.089	0.003	0.005	0.041	0.044	0.072	0.083	0.102	0.106	0.092	0.118	0.135	0.119	0.087	0.015	0.014	0.124	0.135	0.146	0.176	0.119	0.135	0.127	0.004	0.005
3612	Form_4437	DBF4B	dbf4b.L	gnl|gene44626|XL-9_2-gene44626|rna88627|	663	5000	HWDSLLSPPGKRP	K.HWDSLLSPPGK.R	Protein DBF4 homolog B						0.024	0.041	0.064	0.093	0.104	0.101	0.14	0.151	0.152	0.046	0.083	0.041	0.044	0.072	0.083	0.102	0.106	0.092	0.118	0.135	0.119	0.087	0.01	0.018	0.046	0.077	0.106	0.107	0.128	0.178	0.205	0.054	0.072
1370	Form_1689	DBN1	dbn1.L	gnl|gene16469|XL-9_2-gene16469|rna48116|	325	112.7	EQKRTESEVEEAA	K.RTESEVEEAAAIIAQR.T	Drebrin						0.007	0.009	0.062	0.124	0.147	0.181	0.154	0.169	0.136	0.006	0.004	0.132	0.078	0.115	0.102	0.083	0.074	0.079	0.082	0.081	0.071	0.103	0.011	0.008	0.084	0.149	0.144	0.158	0.143	0.163	0.13	0.005	0.005
1371	Form_1690	DBN1	dbn1.L	gnl|gene16469|XL-9_2-gene16469|rna48116|	361	90.4	CGSTLQTPRTGDW	R.AYSECGSTLQTPR.T	Drebrin						0.038	0.025	0.129	0.117	0.115	0.176	0.122	0.137	0.129	0.004	0.007	0.132	0.078	0.115	0.102	0.083	0.074	0.079	0.082	0.081	0.071	0.103	0.056	0.022	0.167	0.135	0.108	0.147	0.109	0.127	0.118	0.003	0.008
1371	Form_1691	DBN1	dbn1.L	gnl|gene16469|XL-9_2-gene16469|rna48116|	353;361	90.4	KQERAYSECGSTL;CGSTLQTPRTGDW	R.AYSECGSTLQTPR.T	Drebrin						0.052	0.024	0.139	0.112	0.103	0.176	0.12	0.137	0.123	0.01	0.005	0.132	0.078	0.115	0.102	0.083	0.074	0.079	0.082	0.081	0.071	0.103	0.076	0.021	0.179	0.127	0.095	0.145	0.106	0.125	0.111	0.008	0.006
1371	Form_1692	DBN1	dbn1.L	gnl|gene16469|XL-9_2-gene16469|rna48116|	357;361	90.4	AYSECGSTLQTPR;CGSTLQTPRTGDW	R.AYSECGSTLQTPR.T	Drebrin						0.041	0.045	0.117	0.115	0.111	0.169	0.105	0.138	0.116	0.024	0.019	0.132	0.078	0.115	0.102	0.083	0.074	0.079	0.082	0.081	0.071	0.103	0.061	0.04	0.152	0.133	0.104	0.141	0.094	0.128	0.106	0.019	0.022
1372	Form_1687	DBN1	dbn1.L	gnl|gene16469|XL-9_2-gene16469|rna48116|	375	30	QMDLMGSPTAFRS	R.TGDWDQMDLMGSPTAFR.S	Drebrin						0.09	0.086	0.14	0.11	0.135	0.152	0.1	0.063	0.095	0.016	0.014	0.132	0.078	0.115	0.102	0.083	0.074	0.079	0.082	0.081	0.071	0.103	0.13	0.073	0.175	0.122	0.122	0.123	0.086	0.056	0.084	0.012	0.016
1373	Form_1686	DBN1	dbn1.L	gnl|gene16469|XL-9_2-gene16469|rna48116|	390	150.9	EAGPPCSPGPEPE	R.SSSEAGPPCSPGPEPER.R	Drebrin						0.142	0.114	0.126	0.117	0.092	0.121	0.087	0.087	0.076	0.009	0.029	0.132	0.078	0.115	0.102	0.083	0.074	0.079	0.082	0.081	0.071	0.103	0.199	0.094	0.153	0.126	0.081	0.095	0.073	0.076	0.065	0.007	0.032
1373	Form_1688	DBN1	dbn1.L	gnl|gene16469|XL-9_2-gene16469|rna48116|	399;400	25.6	PEPERRSSLGEEW;EPERRSSLGEEWT	R.SSSEAGPPCSPGPEPERRSSLGEEWTK.T	Drebrin						0.057	0.053	0.067	0.057	0.119	0.073	0.19	0.132	0.236	0.006	0.008	0.132	0.078	0.115	0.102	0.083	0.074	0.079	0.082	0.081	0.071	0.103	0.086	0.048	0.089	0.067	0.114	0.062	0.173	0.125	0.22	0.005	0.01
5149	Form_6306	DBN1	dbn1.S	gnl|gene9281|XL-9_2-gene9281|rna26953|	347	179.8	ETGPLCSPGPEPG	R.SSSETGPLCSPGPEPGR.H	Drebrin						0.137	0.12	0.104	0.105	0.094	0.104	0.103	0.081	0.086	0.022	0.042	0.129	0.076	0.133	0.108	0.088	0.085	0.07	0.08	0.084	0.056	0.09	0.186	0.096	0.145	0.119	0.087	0.093	0.076	0.068	0.076	0.013	0.04
1829	Form_2256	DBNL	dbnl.S	gnl|gene1874|XL-9_2-gene1874|rna5473|	265	66.1	FLQKERSLPESGS	R.SLPESGSVSAQPGR.L	Drebrin-like protein						0.052	0.019	0.066	0.054	0.09	0.102	0.15	0.203	0.239	0.012	0.013	0.087	0.092	0.091	0.1	0.109	0.095	0.084	0.08	0.092	0.083	0.087	0.05	0.019	0.067	0.06	0.109	0.108	0.14	0.18	0.244	0.011	0.013
1830	Form_2253	DBNL	dbnl.S	gnl|gene1874|XL-9_2-gene1874|rna5473|	298	24.1	ESSPPSSPVHRVQ	K.SACQPESSPPSSPVHR.V	Drebrin-like protein						0.044	0.047	0.113	0.113	0.116	0.129	0.121	0.14	0.137	0.014	0.025	0.087	0.092	0.091	0.1	0.109	0.095	0.084	0.08	0.092	0.083	0.087	0.042	0.047	0.112	0.123	0.137	0.133	0.111	0.122	0.137	0.013	0.024
1830	Form_2254	DBNL	dbnl.S	gnl|gene1874|XL-9_2-gene1874|rna5473|	294	47.5	ACQPESSPPSSPV	K.SACQPESSPPSSPVHR.V	Drebrin-like protein						0.043	0.058	0.14	0.112	0.116	0.132	0.117	0.123	0.123	0.012	0.022	0.087	0.092	0.091	0.1	0.109	0.095	0.084	0.08	0.092	0.083	0.087	0.041	0.058	0.138	0.122	0.137	0.136	0.107	0.107	0.123	0.011	0.021
1831	Form_2251	DBNL	dbnl.S	gnl|gene1874|XL-9_2-gene1874|rna5473|	309	50.4	VQEPPSSPVYRAH	R.VQEPPSSPVYR.A	Drebrin-like protein						0.101	0.084	0.123	0.111	0.1	0.115	0.106	0.123	0.098	0.013	0.026	0.087	0.092	0.091	0.1	0.109	0.095	0.084	0.08	0.092	0.083	0.087	0.096	0.084	0.122	0.121	0.119	0.119	0.097	0.107	0.098	0.012	0.025
1832	Form_2252	DBNL	dbnl.S	gnl|gene1874|XL-9_2-gene1874|rna5473|	317;321	94.1	VYRAHQTPPESPV;HQTPPESPVPPVS	R.AHQTPPESPVPPVSHAPESTVHVK.E	Drebrin-like protein						0.04	0.03	0.134	0.13	0.123	0.16	0.11	0.12	0.117	0.018	0.017	0.087	0.092	0.091	0.1	0.109	0.095	0.084	0.08	0.092	0.083	0.087	0.038	0.03	0.132	0.14	0.145	0.164	0.1	0.104	0.116	0.016	0.016
1832	Form_2255	DBNL	dbnl.S	gnl|gene1874|XL-9_2-gene1874|rna5473|	317	94.1	VYRAHQTPPESPV	R.AHQTPPESPVPPVSHAPESTVHVK.E	Drebrin-like protein						0.169	0.113	0.021	0.043	0.033	0.037	0.039	0.032	0.047	0.23	0.235	0.087	0.092	0.091	0.1	0.109	0.095	0.084	0.08	0.092	0.083	0.087	0.167	0.118	0.022	0.049	0.041	0.04	0.037	0.029	0.049	0.216	0.232
2185	Form_2671	DBNL	dbnl.L	gnl|gene2174|XL-9_2-gene2174|rna6306|	265	73.8	FLQKERSLPESGP	K.ERSLPESGPVSAQPGR.L	Drebrin-like protein						0.032	0.007	0.034	0.041	0.087	0.093	0.142	0.222	0.267	0.047	0.027	0.095	0.088	0.105	0.098	0.102	0.094	0.091	0.087	0.094	0.069	0.077	0.033	0.007	0.039	0.044	0.097	0.095	0.141	0.21	0.273	0.035	0.023
2186	Form_2672	DBNL	dbnl.L	gnl|gene2174|XL-9_2-gene2174|rna6306|	294;298	83.6	ACQPESSPPPSPV;ESSPPPSPVHRVQ	K.SACQPESSPPPSPVHR.V	Drebrin-like protein						0.044	0.065	0.113	0.11	0.106	0.122	0.097	0.109	0.112	0.052	0.07	0.095	0.088	0.105	0.098	0.102	0.094	0.091	0.087	0.094	0.069	0.077	0.045	0.062	0.128	0.116	0.117	0.124	0.095	0.102	0.114	0.039	0.058
2186	Form_2673	DBNL	dbnl.L	gnl|gene2174|XL-9_2-gene2174|rna6306|	298	83.6	ESSPPPSPVHRVQ	K.SACQPESSPPPSPVHR.V	Drebrin-like protein						0.045	0.067	0.122	0.11	0.113	0.111	0.1	0.11	0.129	0.039	0.055	0.095	0.088	0.105	0.098	0.102	0.094	0.091	0.087	0.094	0.069	0.077	0.046	0.063	0.137	0.115	0.123	0.112	0.097	0.102	0.13	0.029	0.045
2186	Form_2674	DBNL	dbnl.L	gnl|gene2174|XL-9_2-gene2174|rna6306|	294	46.9	ACQPESSPPPSPV	K.SACQPESSPPPSPVHR.V	Drebrin-like protein						0.234	0.071	0.074	0.048	0.064	0.068	0.08	0.092	0.122	0.046	0.101	0.095	0.088	0.105	0.098	0.102	0.094	0.091	0.087	0.094	0.069	0.077	0.243	0.068	0.085	0.051	0.071	0.07	0.08	0.087	0.125	0.035	0.085
2587	Form_3184	DCAF1	LOC108714600	gnl|gene34649|XL-9_2-gene34649|rna74285|	965	68.4	HGAYSQSPAFKKQ	K.SDHGAYSQSPAFK.K	DDB1- and CUL4-associated factor 1	GN:VPRBP|VPRBP|human|Q9Y4B6	0	987	HGAYSQSPAIKKQ	NaN	0.014	0.013	0.131	0.142	0.131	0.149	0.108	0.114	0.084	0.07	0.043	0.097	0.091	0.099	0.097	0.098	0.096	0.084	0.084	0.093	0.071	0.091	0.015	0.013	0.141	0.15	0.14	0.156	0.099	0.104	0.085	0.054	0.043
509	Form__644	DCAF8	dcaf8.S	gnl|gene12318|XL-9_2-gene12318|rna35803|	15	16.8	NGKTDVTNGGFSS	K.TDVTNGGFSSSPEDMSGAEEGK.E	DDB1- and CUL4-associated factor 8						0.025	0.012	0.136	0.145	0.166	0.147	0.11	0.107	0.128	0.017	0.009	0.109	0.121	0.111	0.108	0.101	0.099	0.08	0.073	0.063	0.06	0.076	0.029	0.016	0.163	0.169	0.181	0.157	0.095	0.084	0.087	0.011	0.007
509	Form__645	DCAF8	dcaf8.S	gnl|gene12318|XL-9_2-gene12318|rna35803|	21;27	108.3	TNGGFSSSPEDMS;SSPEDMSGAEEGK	K.TDVTNGGFSSSPEDMSGAEEGK.E	DDB1- and CUL4-associated factor 8						0.115	0.044	0.108	0.117	0.124	0.107	0.088	0.08	0.17	0.015	0.032	0.109	0.121	0.111	0.108	0.101	0.099	0.08	0.073	0.063	0.06	0.076	0.136	0.057	0.129	0.137	0.135	0.115	0.076	0.063	0.116	0.01	0.026
509	Form__646	DCAF8	dcaf8.S	gnl|gene12318|XL-9_2-gene12318|rna35803|	27	108.3	SSPEDMSGAEEGK	K.TDVTNGGFSSSPEDMSGAEEGK.E	DDB1- and CUL4-associated factor 8						0.073	0.038	0.103	0.126	0.146	0.149	0.104	0.122	0.13	0.005	0.006	0.109	0.121	0.111	0.108	0.101	0.099	0.08	0.073	0.063	0.06	0.076	0.085	0.049	0.123	0.146	0.158	0.158	0.089	0.096	0.088	0.003	0.005
509	Form__647	DCAF8	dcaf8.S	gnl|gene12318|XL-9_2-gene12318|rna35803|	22	20.3	NGGFSSSPEDMSG	K.TDVTNGGFSSSPEDMSGAEEGK.E	DDB1- and CUL4-associated factor 8						0.037	0.025	0.07	0.073	0.081	0.081	0.07	0.092	0.099	0.172	0.199	0.109	0.121	0.111	0.108	0.101	0.099	0.08	0.073	0.063	0.06	0.076	0.049	0.037	0.093	0.095	0.099	0.097	0.067	0.081	0.075	0.124	0.182
510	Form__648	DCAF8	dcaf8.S	gnl|gene12318|XL-9_2-gene12318|rna35803|	69	33.5	RDSCSETSGEDKD	R.DSCSETSGEDK.D	DDB1- and CUL4-associated factor 8						0.001	0.001	0.002	0.001	0.001	0.002	0.002	0.01	0.012	0.424	0.544	0.109	0.121	0.111	0.108	0.101	0.099	0.08	0.073	0.063	0.06	0.076	0.001	0.002	0.003	0.002	0.002	0.003	0.002	0.01	0.011	0.367	0.596
2613	Form_3217	DCK	dck.2.L	gnl|gene34771|XL-9_2-gene34771|rna74448|	11;17	5000	PKRMCHSPVFNNS;SPVFNNSFEKRVK	R.MCHSPVFNNSFEK.R	Deoxycytidine kinase						0.126	0.093	0.088	0.164	0.128	0.172	0.056	0.081	0.072	0.006	0.014	0.041	0.049	0.062	0.047	0.065	0.057	0.141	0.137	0.121	0.153	0.127	0.072	0.064	0.076	0.108	0.116	0.137	0.111	0.155	0.121	0.013	0.025
2245	Form_2752	DCLRE1A	dclre1a.L	gnl|gene2397|XL-9_2-gene2397|rna6981|	100	75	QPTPTLTPPNKNQ	R.EQPTPTLTPPNK.N	DNA cross-link repair 1A protein						0.017	0.016	0.076	0.099	0.082	0.1	0.109	0.189	0.143	0.081	0.088	0.095	0.074	0.094	0.097	0.099	0.099	0.082	0.077	0.091	0.099	0.092	0.018	0.013	0.079	0.107	0.09	0.11	0.099	0.161	0.144	0.089	0.09
2245	Form_2753	DCLRE1A	dclre1a.L	gnl|gene2397|XL-9_2-gene2397|rna6981|	98;100	75	REQPTPTLTPPNK;QPTPTLTPPNKNQ	R.EQPTPTLTPPNK.N	DNA cross-link repair 1A protein						0.065	0.052	0.088	0.077	0.097	0.111	0.144	0.171	0.112	0.039	0.044	0.095	0.074	0.094	0.097	0.099	0.099	0.082	0.077	0.091	0.099	0.092	0.069	0.043	0.093	0.084	0.107	0.123	0.132	0.147	0.114	0.043	0.045
2246	Form_2751	DCLRE1A	dclre1a.L	gnl|gene2397|XL-9_2-gene2397|rna6981|	568	20.4	LADHTNTEPEGAT	K.DPLADHTNTEPEGATGNQR.G	DNA cross-link repair 1A protein						0.081	0.077	0.167	0.075	0.085	0.134	0.108	0.111	0.095	0.032	0.035	0.095	0.074	0.094	0.097	0.099	0.099	0.082	0.077	0.091	0.099	0.092	0.085	0.063	0.173	0.08	0.093	0.147	0.098	0.094	0.095	0.035	0.036
2566	Form_3161	DCP1A	LOC108704027	gnl|gene34536|XL-9_2-gene34536|rna74132|	172	61.5	GQGLNDSGNGSYS	K.NEYEQGQGLNDSGNGSYSDK.S	mRNA-decapping enzyme 1A						0.042	0.041	0.093	0.115	0.131	0.148	0.097	0.142	0.177	0.004	0.01	0.08	0.073	0.099	0.095	0.111	0.106	0.109	0.098	0.095	0.066	0.069	0.034	0.03	0.093	0.11	0.147	0.158	0.107	0.141	0.17	0.003	0.007
3604	Form_4424	DCP1B	LOC108712573	gnl|gene44610|XL-9_2-gene44610|rna88599|	446	5000	LLQQACSPQRIPA	K.QNLLLQQACSPQR.I	mRNA-decapping enzyme 1B						0.046	0.052	0.157	0.183	0.128	0.131	0.103	0.095	0.063	0.017	0.025	0.093	0.085	0.1	0.081	0.095	0.091	0.096	0.095	0.1	0.081	0.082	0.047	0.048	0.171	0.161	0.132	0.13	0.108	0.098	0.068	0.015	0.022
2759	Form_3393	DCPS	dcps.L	gnl|gene36178|XL-9_2-gene36178|rna76409|	105	32.1	YGVYHLSPSPELN	K.NDIYGVYHLSPSPELNEIK.T	m7GpppX diphosphatase						0.069	0.07	0.059	0.103	0.081	0.13	0.109	0.128	0.114	0.052	0.087	0.098	0.082	0.105	0.087	0.101	0.088	0.098	0.089	0.096	0.076	0.081	0.074	0.063	0.068	0.098	0.09	0.126	0.117	0.125	0.12	0.043	0.077
99	Form__130	DCTD	dctd.L	gnl|gene10424|XL-9_2-gene10424|rna30298|	193	44.2	INSSRPSPKPLxx	K.IVIDFDSINSSRPSPK.P	Deoxycytidylate deaminase						0.08	0.058	0.085	0.092	0.112	0.126	0.124	0.123	0.185	0.007	0.008	0.07	0.072	0.07	0.069	0.07	0.073	0.106	0.114	0.103	0.128	0.125	0.064	0.048	0.068	0.073	0.09	0.105	0.15	0.161	0.218	0.01	0.012
959	Form_1177	DCTN1	dctn1.L	gnl|gene14485|XL-9_2-gene14485|rna42175|	124	54	DTTSPETPEPTAS	R.QSQIQVIEDGADTTSPETPEPTASK.G	Dynactin subunit 1						0.004	0.005	0.183	0.148	0.133	0.092	0.092	0.09	0.136	0.05	0.069	0.094	0.092	0.098	0.096	0.092	0.097	0.085	0.084	0.081	0.09	0.089	0.004	0.005	0.197	0.156	0.134	0.098	0.086	0.083	0.121	0.049	0.067
959	Form_1178	DCTN1	dctn1.L	gnl|gene14485|XL-9_2-gene14485|rna42175|	121	43.4	DGADTTSPETPEP	R.QSQIQVIEDGADTTSPETPEPTASK.G	Dynactin subunit 1						0.081	0.047	0.096	0.096	0.136	0.122	0.113	0.111	0.146	0.024	0.028	0.094	0.092	0.098	0.096	0.092	0.097	0.085	0.084	0.081	0.09	0.089	0.084	0.048	0.104	0.102	0.138	0.131	0.106	0.103	0.131	0.024	0.028
959	Form_1179	DCTN1	dctn1.L	gnl|gene14485|XL-9_2-gene14485|rna42175|	121;124	54	DGADTTSPETPEP;DTTSPETPEPTAS	R.QSQIQVIEDGADTTSPETPEPTASK.G	Dynactin subunit 1						0.01	0.01	0.049	0.108	0.129	0.153	0.114	0.158	0.138	0.093	0.037	0.094	0.092	0.098	0.096	0.092	0.097	0.085	0.084	0.081	0.09	0.089	0.011	0.01	0.054	0.116	0.133	0.166	0.108	0.148	0.125	0.093	0.037
2107	Form_2578	DCTN1	dctn1.S	gnl|gene20120|XL-9_2-gene20120|rna58712|	553	5000	EKEQQPSPEMFDF	K.EQQPSPEMFDFK.I	Dynactin subunit 1						0.031	0.022	0.052	0.057	0.081	0.093	0.09	0.112	0.19	0.124	0.148	0.091	0.091	0.096	0.094	0.097	0.098	0.093	0.093	0.092	0.078	0.077	0.032	0.022	0.056	0.06	0.088	0.102	0.094	0.116	0.195	0.108	0.127
729	Form__907	DCTN4	dctn4.S	gnl|gene13384|XL-9_2-gene13384|rna38939|	200	110.3	RLQRQRSGAPITA	R.SGAPITALAGLTLK.E	Dynactin subunit 4						0.014	0.017	0.068	0.075	0.113	0.11	0.175	0.181	0.237	0.001	0.01	0.096	0.09	0.095	0.087	0.096	0.094	0.096	0.093	0.091	0.077	0.085	0.014	0.016	0.069	0.07	0.117	0.111	0.18	0.181	0.232	0.001	0.009
5233	Form_6403	DCUN1D5	dcun1d5.S	gnl|gene9854|XL-9_2-gene9854|rna28641|	9	35.3	VKKKRKSSASEEM	K.SSASEEMNLK.K	DCN1-like protein 5						0.278	0.03	0.107	0.074	0.104	0.084	0.11	0.086	0.11	0.007	0.011	0.085	0.088	0.09	0.099	0.095	0.104	0.083	0.108	0.09	0.081	0.077	0.258	0.029	0.105	0.08	0.108	0.095	0.1	0.101	0.108	0.006	0.009
5233	Form_6404	DCUN1D5	dcun1d5.S	gnl|gene9854|XL-9_2-gene9854|rna28641|	10;12	70	KKKRKSSASEEMN;KRKSSASEEMNLK	K.SSASEEMNLK.K	DCN1-like protein 5						0.031	0.084	0.162	0.106	0.126	0.117	0.11	0.104	0.146	0.003	0.01	0.085	0.088	0.09	0.099	0.095	0.104	0.083	0.108	0.09	0.081	0.077	0.028	0.079	0.155	0.112	0.127	0.13	0.097	0.12	0.14	0.003	0.008
5233	Form_6405	DCUN1D5	dcun1d5.S	gnl|gene9854|XL-9_2-gene9854|rna28641|	10	32.3	KKKRKSSASEEMN	K.SSASEEMNLK.K	DCN1-like protein 5						0.041	0.115	0.124	0.145	0.112	0.142	0.098	0.109	0.095	0.007	0.012	0.085	0.088	0.09	0.099	0.095	0.104	0.083	0.108	0.09	0.081	0.077	0.037	0.107	0.118	0.152	0.113	0.156	0.086	0.125	0.091	0.006	0.01
4796	Form_5877	DDHD1	ddhd1.L	gnl|gene7895|XL-9_2-gene7895|rna23031|	702	22.3	SIPSPSTSPVLPR	K.DTTSMSDTESIPSPSTSPVLPR.R	Phospholipase DDHD1	GN:DDHD1|DDHD1|human|Q8NEL9	0	726	TIPSPVTSPVLSR	NaN	0.103	0.037	0.026	0.048	0.064	0.059	0.095	0.106	0.157	0.171	0.134	0.096	0.096	0.105	0.085	0.103	0.098	0.087	0.085	0.092	0.074	0.078	0.113	0.041	0.031	0.047	0.075	0.066	0.095	0.103	0.165	0.145	0.12
3097	Form_3804	DDHD2	ddhd2.S	gnl|gene39848|XL-9_2-gene39848|rna81610|	452	62.2	TGTTQATPPAADS	K.DSTGTTQATPPAADSK.Q	Phospholipase DDHD2						0.022	0.01	0.063	0.057	0.102	0.069	0.107	0.1	0.233	0.097	0.139	0.088	0.081	0.097	0.101	0.101	0.104	0.087	0.083	0.088	0.081	0.09	0.021	0.009	0.068	0.064	0.114	0.079	0.103	0.092	0.226	0.087	0.138
3845	Form_4728	DDI2	ddi2.L	gnl|gene46812|XL-9_2-gene46812|rna91739|	188	31.7	ERIRLYSADPFDL	R.LYSADPFDLDAQAK.I	Protein DDI1 homolog 2	GN:DDI2|DDI2|human|Q5TDH0	0	194	ERIRLFSADPFDL	NaN	0.006	0.021	0.17	0.178	0.163	0.151	0.114	0.106	0.087	0	0.004	0.095	0.094	0.091	0.086	0.083	0.085	0.092	0.09	0.091	0.092	0.1	0.006	0.022	0.176	0.174	0.154	0.146	0.119	0.108	0.09	0	0.004
3846	Form_4727	DDI2	ddi2.L	gnl|gene46812|XL-9_2-gene46812|rna91739|	384	5000	AEVLQKSADEADQ	K.SADEADQQKP.-	Protein DDI1 homolog 2						0.04	0.067	0.134	0.124	0.143	0.145	0.101	0.11	0.126	0.003	0.006	0.095	0.094	0.091	0.086	0.083	0.085	0.092	0.09	0.091	0.092	0.1	0.043	0.071	0.138	0.12	0.134	0.139	0.105	0.112	0.129	0.003	0.007
3167	Form_3888	DDRGK1	ddrgk1.L	gnl|gene40633|XL-9_2-gene40633|rna82727|	88	144	EEDADESPEVQTQ	R.EAIEEDADESPEVQTQGK.I	DDRGK domain-containing protein 1						0.031	0.02	0.065	0.084	0.099	0.124	0.133	0.185	0.237	0.007	0.015	0.094	0.101	0.096	0.09	0.103	0.095	0.087	0.085	0.085	0.086	0.08	0.032	0.022	0.069	0.084	0.113	0.131	0.129	0.175	0.224	0.007	0.013
891	Form_1096	DDX18	ddx18.L	gnl|gene14177|XL-9_2-gene14177|rna41289|	39	18.2	ILLTSKSEEEAEG	K.EAILLTSKSEEEAEGIAEEQEAGNEADK.T	ATP-dependent RNA helicase DDX18						0.083	0.049	0.078	0.078	0.093	0.101	0.117	0.13	0.15	0.054	0.067	0.133	0.1	0.109	0.112	0.1	0.087	0.076	0.075	0.068	0.059	0.081	0.124	0.055	0.096	0.098	0.105	0.099	0.1	0.11	0.115	0.036	0.061
892	Form_1095	DDX18	ddx18.L	gnl|gene14177|XL-9_2-gene14177|rna41289|	109	44.9	EEAPEASDQESKC	K.AKQEEEAPEASDQESK.C	ATP-dependent RNA helicase DDX18						0.087	0.08	0.123	0.111	0.112	0.134	0.106	0.108	0.12	0.01	0.01	0.133	0.1	0.109	0.112	0.1	0.087	0.076	0.075	0.068	0.059	0.081	0.124	0.085	0.143	0.132	0.119	0.124	0.086	0.086	0.087	0.006	0.009
3989	Form_4899	DDX18	LOC108702873	gnl|gene48285|XL-9_2-gene48285|rna93811|	76	71.2	AEETSQTPPAKRK	R.EETQEHIAPDAEETSQTPPAK.R	ATP-dependent RNA helicase DDX18						0.026	0.029	0.155	0.108	0.114	0.106	0.098	0.112	0.123	0.055	0.075	0.132	0.115	0.106	0.106	0.108	0.092	0.08	0.073	0.068	0.052	0.068	0.038	0.037	0.185	0.128	0.138	0.11	0.088	0.092	0.094	0.032	0.057
1975	Form_2417	DDX19A	ddx19b.L	gnl|gene19492|XL-9_2-gene19492|rna56964|	96	48.1	LQRDPNSPLYSVK	R.DPNSPLYSVK.S	RNA helicase (Fragment)	GN:DDX19B|DDX19B|human|Q9UMR2	0	86	LQRDPNSPLYSVK	NaN	0.002	0.004	0.038	0.068	0.096	0.124	0.118	0.146	0.182	0.116	0.107	0.08	0.078	0.09	0.087	0.098	0.102	0.096	0.099	0.102	0.091	0.077	0.002	0.003	0.036	0.062	0.099	0.133	0.119	0.152	0.196	0.111	0.087
523	Form__667	DDX20	ddx20.L	gnl|gene12383|XL-9_2-gene12383|rna36012|	561	23	EIVHVYSGPDDKN	K.HVEIVHVYSGPDDK.N	Probable ATP-dependent RNA helicase DDX20						0.129	0.101	0.08	0.124	0.134	0.123	0.09	0.103	0.097	0.008	0.01	0.093	0.086	0.096	0.09	0.095	0.088	0.092	0.085	0.093	0.086	0.096	0.132	0.096	0.085	0.123	0.14	0.119	0.091	0.096	0.099	0.008	0.011
524	Form__661	DDX20	ddx20.L	gnl|gene12383|XL-9_2-gene12383|rna36012|	589	39.6	GTSEAMSISEKCD	R.TDDGGTSEAMSISEK.C	Probable ATP-dependent RNA helicase DDX20						0.068	0.066	0.101	0.129	0.114	0.153	0.104	0.148	0.103	0.005	0.007	0.093	0.086	0.096	0.09	0.095	0.088	0.092	0.085	0.093	0.086	0.096	0.07	0.063	0.107	0.128	0.12	0.149	0.106	0.139	0.106	0.005	0.007
524	Form__662	DDX20	ddx20.L	gnl|gene12383|XL-9_2-gene12383|rna36012|	585;589	39.6	TDDGGTSEAMSIS;GTSEAMSISEKCD	R.TDDGGTSEAMSISEK.C	Probable ATP-dependent RNA helicase DDX20						0.13	0.038	0.05	0.074	0.046	0.106	0.146	0.262	0.138	0.003	0.007	0.093	0.086	0.096	0.09	0.095	0.088	0.092	0.085	0.093	0.086	0.096	0.134	0.036	0.053	0.074	0.049	0.104	0.149	0.247	0.143	0.003	0.007
525	Form__666	DDX20	ddx20.L	gnl|gene12383|XL-9_2-gene12383|rna36012|	629	75.8	DIPNPKSAIEHPN	K.SAIEHPNSYPEVLR.E	Probable ATP-dependent RNA helicase DDX20						0.104	0.055	0.097	0.12	0.098	0.126	0.106	0.138	0.128	0.012	0.018	0.093	0.086	0.096	0.09	0.095	0.088	0.092	0.085	0.093	0.086	0.096	0.106	0.052	0.102	0.119	0.102	0.122	0.107	0.129	0.131	0.011	0.019
526	Form__664	DDX20	ddx20.L	gnl|gene12383|XL-9_2-gene12383|rna36012|	661	19.3	TDNISDSLKEGNT	R.TIESTVCELNTDNISDSLK.E	Probable ATP-dependent RNA helicase DDX20						0.029	0.04	0.042	0.076	0.084	0.115	0.144	0.227	0.224	0.006	0.012	0.093	0.086	0.096	0.09	0.095	0.088	0.092	0.085	0.093	0.086	0.096	0.03	0.038	0.045	0.076	0.088	0.112	0.147	0.214	0.231	0.006	0.013
526	Form__665	DDX20	ddx20.L	gnl|gene12383|XL-9_2-gene12383|rna36012|	659	45	LNTDNISDSLKEG	R.TIESTVCELNTDNISDSLK.E	Probable ATP-dependent RNA helicase DDX20						0.091	0.091	0.067	0.09	0.097	0.096	0.127	0.194	0.125	0.009	0.011	0.093	0.086	0.096	0.09	0.095	0.088	0.092	0.085	0.093	0.086	0.096	0.094	0.087	0.071	0.09	0.102	0.094	0.129	0.183	0.129	0.009	0.012
527	Form__663	DDX20	ddx20.L	gnl|gene12383|XL-9_2-gene12383|rna36012|	683	86.7	MSSVSNTKSRRRS	K.GEMSSVSNTK.S	Probable ATP-dependent RNA helicase DDX20						0.021	0.032	0.172	0.077	0.069	0.117	0.093	0.106	0.113	0.053	0.148	0.093	0.086	0.096	0.09	0.095	0.088	0.092	0.085	0.093	0.086	0.096	0.021	0.03	0.18	0.076	0.072	0.112	0.093	0.098	0.115	0.05	0.155
527	Form__668	DDX20	ddx20.L	gnl|gene12383|XL-9_2-gene12383|rna36012|	678	31.4	RYKGEMSSVSNTK	K.GEMSSVSNTK.S	Probable ATP-dependent RNA helicase DDX20						0.008	0.031	0.18	0.108	0.118	0.17	0.113	0.135	0.125	0.005	0.008	0.093	0.086	0.096	0.09	0.095	0.088	0.092	0.085	0.093	0.086	0.096	0.008	0.029	0.189	0.107	0.123	0.164	0.114	0.126	0.127	0.005	0.008
412	Form__530	DDX21	ddx21.L	gnl|gene11970|XL-9_2-gene11970|rna34774|	91;93	57.6	EQPDPSTPTPKKV;PDPSTPTPKKVKK	K.SDLSETAEQCDGEQPDPSTPTPK.K	Nucleolar RNA helicase 2						0.009	0.01	0.119	0.111	0.129	0.126	0.144	0.119	0.162	0.043	0.027	0.119	0.129	0.155	0.129	0.112	0.113	0.061	0.055	0.039	0.033	0.056	0.012	0.015	0.208	0.162	0.163	0.161	0.099	0.074	0.071	0.016	0.017
412	Form__531	DDX21	ddx21.L	gnl|gene11970|XL-9_2-gene11970|rna34774|	93	57.6	PDPSTPTPKKVKK	K.SDLSETAEQCDGEQPDPSTPTPK.K	Nucleolar RNA helicase 2						0.014	0.005	0.027	0.041	0.077	0.095	0.165	0.199	0.359	0.006	0.013	0.119	0.129	0.155	0.129	0.112	0.113	0.061	0.055	0.039	0.033	0.056	0.025	0.01	0.062	0.078	0.128	0.161	0.15	0.163	0.209	0.003	0.011
305	Form__396	DDX25	ddx25.L	gnl|gene11519|XL-9_2-gene11519|rna33456|	472	5000	KITKLNSMDMDEM	K.LNSMDMDEMGK.I	RNA helicase (Fragment)						0.059	0.088	0.098	0.133	0.106	0.133	0.09	0.085	0.161	0.035	0.012	0.178	0.155	0.145	0.117	0.102	0.074	0.056	0.042	0.029	0.023	0.081	0.118	0.152	0.158	0.173	0.121	0.11	0.056	0.04	0.052	0.009	0.011
4327	Form_5310	DDX3X	ddx3x.L	gnl|gene529|XL-9_2-gene529|rna1505|	114	27.8	DKDAYSSFGSRGE	K.DAYSSFGSR.G	RNA helicase	GN:DDX3X|DDX3|human|O00571	0	71	DKDAYSSFGSRSD	1	0.042	0.041	0.097	0.089	0.12	0.117	0.14	0.172	0.175	0.002	0.006	0.096	0.087	0.098	0.096	0.096	0.097	0.087	0.085	0.084	0.087	0.088	0.045	0.039	0.105	0.094	0.127	0.125	0.134	0.161	0.162	0.002	0.006
4328	Form_5309	DDX3X	ddx3x.L	gnl|gene529|XL-9_2-gene529|rna1505|	168	103	RGNSRWSDERNDE	R.WSDERNDEDDWSK.P	RNA helicase						0.049	0.012	0.066	0.058	0.103	0.087	0.143	0.133	0.314	0.013	0.021	0.096	0.087	0.098	0.096	0.096	0.097	0.087	0.085	0.084	0.087	0.088	0.053	0.012	0.072	0.062	0.111	0.095	0.139	0.127	0.295	0.013	0.021
1437	Form_1768	DDX4	ddx4.L	gnl|gene16823|XL-9_2-gene16823|rna49170|	224	34.3	GVESGKSQEEGNE	K.GRNEEVGVESGKSQEEGNEK.D	Probable ATP-dependent RNA helicase DDX4						0.073	0.021	0.099	0.098	0.127	0.127	0.098	0.107	0.157	0.046	0.047	0.101	0.104	0.09	0.085	0.09	0.086	0.092	0.091	0.084	0.085	0.093	0.082	0.024	0.1	0.093	0.128	0.122	0.101	0.109	0.148	0.044	0.049
1153	Form_1430	DDX41	ddx41.L	gnl|gene15478|XL-9_2-gene15478|rna45184|	58;60	46.3	EEEQKDSGSDYRG;EQKDSGSDYRGDE	K.DSGSDYRGDEDDIPLGPR.S	Probable ATP-dependent RNA helicase DDX41						0.124	0.066	0.142	0.14	0.111	0.13	0.098	0.092	0.09	0.002	0.006	0.096	0.084	0.093	0.093	0.099	0.097	0.096	0.093	0.087	0.08	0.081	0.127	0.059	0.141	0.139	0.117	0.135	0.101	0.091	0.084	0.002	0.005
1153	Form_1431	DDX41	ddx41.L	gnl|gene15478|XL-9_2-gene15478|rna45184|	58	46.3	EEEQKDSGSDYRG	K.DSGSDYRGDEDDIPLGPR.S	Probable ATP-dependent RNA helicase DDX41	GN:DDX41|DDX41|human|Q9UJV9	0	66	EEEQQDSGSEPRG	NaN	0.072	0.055	0.1	0.128	0.135	0.136	0.108	0.126	0.125	0.007	0.009	0.096	0.084	0.093	0.093	0.099	0.097	0.096	0.093	0.087	0.08	0.081	0.074	0.049	0.1	0.127	0.143	0.141	0.111	0.125	0.116	0.006	0.008
3185	Form_3914	DDX46	ddx46.L	gnl|gene40858|XL-9_2-gene40858|rna83032|	183	5000	RKRVVESIGELKK	K.RVVESIGELK.K	RNA helicase						0.003	0.005	0.073	0.085	0.117	0.119	0.144	0.19	0.246	0.004	0.013	0.095	0.09	0.098	0.094	0.095	0.103	0.088	0.092	0.086	0.083	0.075	0.003	0.005	0.078	0.087	0.121	0.133	0.138	0.19	0.23	0.004	0.011
3186	Form_3913	DDX46	ddx46.L	gnl|gene40858|XL-9_2-gene40858|rna83032|	201	5000	RQGKKWSLEDDDD	K.KWSLEDDDDDEEEPTEGEK.E	RNA helicase						0.003	0.004	0.042	0.069	0.109	0.137	0.156	0.215	0.247	0.007	0.011	0.095	0.09	0.098	0.094	0.095	0.103	0.088	0.092	0.086	0.083	0.075	0.003	0.004	0.045	0.071	0.113	0.153	0.149	0.215	0.231	0.006	0.009
3186	Form_3915	DDX46	ddx46.L	gnl|gene40858|XL-9_2-gene40858|rna83032|	201;213	5000	RQGKKWSLEDDDD;DDEEEPTEGEKEG	K.KWSLEDDDDDEEEPTEGEK.E	RNA helicase	GN:DDX46|DDX46|human|Q7L014	0	199	KQGKKWSLEDDDD	NaN	0.008	0.008	0.049	0.062	0.109	0.112	0.171	0.179	0.276	0.013	0.012	0.095	0.09	0.098	0.094	0.095	0.103	0.088	0.092	0.086	0.083	0.075	0.008	0.008	0.053	0.064	0.113	0.127	0.165	0.181	0.26	0.012	0.01
3187	Form_3916	DDX46	ddx46.L	gnl|gene40858|XL-9_2-gene40858|rna83032|	946	5000	DAAANESFKRYEE	K.QDAAANESFK.R	RNA helicase	GN:DDX46|DDX46|human|Q7L014	0	928	DGGQNESFKRYEE	NaN	0.022	0.02	0.105	0.122	0.128	0.142	0.116	0.143	0.165	0.012	0.025	0.095	0.09	0.098	0.094	0.095	0.103	0.088	0.092	0.086	0.083	0.075	0.023	0.019	0.111	0.123	0.131	0.157	0.11	0.142	0.153	0.011	0.02
264	Form__349	DDX51	ddx51.L	gnl|gene11192|XL-9_2-gene11192|rna32523|	89	49.2	EEVKSPSENEQDS	K.SPSENEQDSQLQEATHIK.E	ATP-dependent RNA helicase DDX51						0.114	0.075	0.127	0.122	0.151	0.114	0.096	0.096	0.092	0.005	0.008	0.095	0.085	0.101	0.1	0.088	0.107	0.097	0.084	0.085	0.078	0.079	0.115	0.068	0.137	0.13	0.141	0.13	0.099	0.086	0.083	0.004	0.007
4753	Form_5831	DDX54	ddx54.L	gnl|gene7642|XL-9_2-gene7642|rna22280|	20;23	5000	CCQRQDSDDSDKG;RQDSDDSDKGEFR	R.QDSDDSDKGEFR.V	ATP-dependent RNA helicase DDX54						0.09	0.054	0.146	0.092	0.107	0.122	0.161	0.086	0.13	0.006	0.006	0.152	0.137	0.118	0.104	0.097	0.075	0.049	0.069	0.057	0.045	0.096	0.153	0.083	0.192	0.107	0.116	0.102	0.088	0.066	0.083	0.003	0.006
1982	Form_2424	DDX55	ddx55.S	gnl|gene19568|XL-9_2-gene19568|rna57178|	584;590;593	188	TAVGGKSEVEEGS;SEVEEGSEDSNxx;EEGSEDSNxxxxx	K.QLTAVGGKSEVEEGSEDSN.-	ATP-dependent RNA helicase DDX55						0.156	0.071	0.123	0.109	0.116	0.105	0.102	0.088	0.105	0.012	0.012	0.14	0.132	0.134	0.109	0.091	0.08	0.064	0.062	0.056	0.049	0.083	0.223	0.096	0.169	0.121	0.108	0.086	0.067	0.056	0.06	0.006	0.01
926	Form_1136	DDX6	ddx6.S	gnl|gene14340|XL-9_2-gene14340|rna41768|	54	23.9	STINSGSQQQAQS	K.NASTINSGSQQQAQSMSSVIK.P	Probable ATP-dependent RNA helicase DDX6						0.004	0.009	0.17	0.155	0.193	0.156	0.125	0.095	0.081	0.006	0.007	0.091	0.094	0.094	0.099	0.093	0.098	0.089	0.09	0.087	0.082	0.084	0.004	0.009	0.171	0.164	0.192	0.164	0.119	0.091	0.075	0.005	0.006
927	Form_1135	DDX6	ddx6.S	gnl|gene14340|XL-9_2-gene14340|rna41768|	476	47.1	AEYHSESGENKHx	K.NLYVAEYHSESGENK.H	Probable ATP-dependent RNA helicase DDX6						0.072	0.048	0.082	0.102	0.125	0.125	0.11	0.14	0.184	0.003	0.01	0.091	0.094	0.094	0.099	0.093	0.098	0.089	0.09	0.087	0.082	0.084	0.071	0.049	0.083	0.109	0.126	0.133	0.106	0.136	0.173	0.003	0.009
1201	Form_1489	DDX6	ddx6.L	gnl|gene15717|XL-9_2-gene15717|rna45884|	16	41.3	VLMGMSSQNGQLR	R.TENPVLMGMSSQNGQLR.G	Probable ATP-dependent RNA helicase DDX6	GN:DDX6|DDX6|human|P26196	0	16	VIMGLSSQNGQLR	NaN	0.033	0.027	0.07	0.093	0.124	0.131	0.118	0.129	0.229	0.021	0.025	0.092	0.096	0.086	0.096	0.095	0.092	0.091	0.087	0.086	0.086	0.092	0.034	0.029	0.067	0.099	0.13	0.134	0.119	0.124	0.218	0.02	0.025
3499	Form_4303	DENND1A	dennd1a.S	gnl|gene43227|XL-9_2-gene43227|rna86529|	468	49.7	EPLPQISPSSIEK	K.DMAENGFSTATEEPLPQISPSSIEK.K	DENN domain-containing protein 1A						0.031	0.02	0.08	0.104	0.104	0.118	0.117	0.107	0.108	0.107	0.105	0.093	0.088	0.119	0.105	0.107	0.097	0.082	0.082	0.088	0.066	0.073	0.032	0.02	0.106	0.121	0.123	0.127	0.106	0.097	0.105	0.078	0.085
2776	Form_3413	DENND4A	LOC108710310	gnl|gene36393|XL-9_2-gene36393|rna76712|	1182;1183	49.8	EDVEKESSDDESP;DVEKESSDDESPI	K.EDVEKESSDDESPIGGADDK.V	C-myc promoter-binding protein						0.1	0.036	0.084	0.345	0.285	0.083	0.021	0.028	0.016	0.001	0.002	0.052	0.106	0.075	0.022	0.019	0.08	0.165	0.14	0.121	0.11	0.111	0.117	0.087	0.141	0.171	0.122	0.149	0.077	0.087	0.043	0.002	0.005
1799	Form_2213	DENND4C	dennd4c.S	gnl|gene18613|XL-9_2-gene18613|rna54332|	936	40.1	EDNCNDSNSGEHT	R.EDNCNDSNSGEHTLFVR.D	DENN domain-containing protein 4C (Fragment)						0.115	0.046	0.11	0.106	0.124	0.12	0.102	0.114	0.134	0.018	0.012	0.099	0.09	0.095	0.099	0.095	0.096	0.086	0.082	0.08	0.093	0.086	0.125	0.045	0.115	0.115	0.129	0.126	0.096	0.103	0.118	0.018	0.011
1800	Form_2216	DENND4C	dennd4c.S	gnl|gene18613|XL-9_2-gene18613|rna54332|	1119	65.8	MLLKKGSLDLTTN	K.KGSLDLTTNEIAIK.M	DENN domain-containing protein 4C (Fragment)						0.035	0.036	0.084	0.109	0.113	0.107	0.156	0.178	0.171	0.004	0.008	0.099	0.09	0.095	0.099	0.095	0.096	0.086	0.082	0.08	0.093	0.086	0.039	0.036	0.089	0.121	0.12	0.115	0.15	0.164	0.153	0.004	0.008
1801	Form_2215	DENND4C	dennd4c.S	gnl|gene18613|XL-9_2-gene18613|rna54332|	1278	5000	SEEKHISPVVARN	K.HISPVVAR.N	DENN domain-containing protein 4C (Fragment)						0.032	0.014	0.078	0.099	0.122	0.134	0.125	0.162	0.154	0.039	0.041	0.099	0.09	0.095	0.099	0.095	0.096	0.086	0.082	0.08	0.093	0.086	0.035	0.014	0.083	0.109	0.13	0.144	0.12	0.148	0.138	0.041	0.039
1802	Form_2214	DENND4C	dennd4c.S	gnl|gene18613|XL-9_2-gene18613|rna54332|	1503	94.5	NYFNNESVQGKAS	K.HNYFNNESVQGK.A	DENN domain-containing protein 4C (Fragment)						0.024	0.026	0.121	0.135	0.148	0.151	0.13	0.125	0.128	0.004	0.007	0.099	0.09	0.095	0.099	0.095	0.096	0.086	0.082	0.08	0.093	0.086	0.026	0.026	0.126	0.147	0.155	0.159	0.123	0.113	0.113	0.004	0.007
4648	Form_5705	DENND4C	dennd4c.L	gnl|gene7100|XL-9_2-gene7100|rna20731|	945;947	78.3	VDNCNDSNSGEHT;NCNDSNSGEHTLF	R.VDNCNDSNSGEHTLFVR.D	DENN domain-containing protein 4C (Fragment)						0.063	0.043	0.072	0.103	0.1	0.129	0.113	0.192	0.166	0.007	0.011	0.105	0.087	0.1	0.088	0.1	0.1	0.096	0.077	0.088	0.075	0.083	0.073	0.041	0.079	0.099	0.11	0.141	0.119	0.162	0.16	0.006	0.01
4649	Form_5706	DENND4C	dennd4c.L	gnl|gene7100|XL-9_2-gene7100|rna20731|	1128	73.3	MLLKKVSLDLATN	K.KVSLDLATNEMAIK.M	DENN domain-containing protein 4C (Fragment)						0.045	0.035	0.052	0.086	0.101	0.096	0.149	0.231	0.168	0.019	0.017	0.105	0.087	0.1	0.088	0.1	0.1	0.096	0.077	0.088	0.075	0.083	0.052	0.034	0.058	0.084	0.112	0.107	0.159	0.197	0.164	0.016	0.016
4650	Form_5704	DENND4C	dennd4c.L	gnl|gene7100|XL-9_2-gene7100|rna20731|	1465	5000	EPGDNLSFKMASN	K.FPLRPEEPGDNLSFK.M	DENN domain-containing protein 4C (Fragment)						0.082	0.116	0.122	0.152	0.111	0.125	0.095	0.116	0.072	0.004	0.006	0.105	0.087	0.1	0.088	0.1	0.1	0.096	0.077	0.088	0.075	0.083	0.093	0.109	0.131	0.144	0.119	0.134	0.098	0.096	0.068	0.003	0.005
4651	Form_5703	DENND4C	dennd4c.L	gnl|gene7100|XL-9_2-gene7100|rna20731|	1502	78.7	HSYLNESVQGKAS	K.HSYLNESVQGK.A	DENN domain-containing protein 4C (Fragment)						0.077	0.057	0.107	0.118	0.109	0.118	0.105	0.138	0.141	0.012	0.017	0.105	0.087	0.1	0.088	0.1	0.1	0.096	0.077	0.088	0.075	0.083	0.088	0.054	0.116	0.112	0.118	0.128	0.109	0.115	0.134	0.01	0.015
287	Form__374	DENND5B	dennd5b.L	gnl|gene11355|XL-9_2-gene11355|rna33008|	1087	44.6	TVARRLSITSLTG	R.RLSITSLTGK.N	DENN domain-containing protein 5B	GN:DENND5B|DENND5B|human|Q6ZUT9	0	1076	TTARRLSITSLTG	NaN	0.089	0.075	0.099	0.116	0.125	0.104	0.14	0.127	0.095	0.012	0.017	0.099	0.1	0.099	0.094	0.101	0.102	0.079	0.082	0.096	0.06	0.088	0.095	0.08	0.105	0.117	0.135	0.114	0.119	0.112	0.098	0.008	0.016
559	Form__710	DENR	denr.L	gnl|gene12557|XL-9_2-gene12557|rna36507|	87	58.6	VEGQATSGEEEEK	K.QETGTVEGQATSGEEEEK.K	Density-regulated protein						0.104	0.086	0.117	0.103	0.118	0.102	0.101	0.112	0.131	0.01	0.014	0.097	0.094	0.096	0.099	0.099	0.106	0.094	0.089	0.09	0.069	0.068	0.106	0.085	0.118	0.107	0.123	0.114	0.1	0.105	0.124	0.007	0.01
3412	Form_4198	DEPDC1	depdc1-b	gnl|gene42782|XL-9_2-gene42782|rna85832|	403	32.4	RGTIGGSCQNLST	R.GTIGGSCQNLSTSR.K	DEP domain-containing protein 1A						0.099	0.053	0.116	0.102	0.133	0.139	0.076	0.118	0.135	0.014	0.015	0.097	0.088	0.11	0.094	0.095	0.11	0.092	0.08	0.077	0.066	0.09	0.103	0.05	0.136	0.102	0.135	0.163	0.075	0.101	0.111	0.01	0.014
3382	Form_4160	DEPDC5	LOC108716023	gnl|gene42480|XL-9_2-gene42480|rna85409|	515;518	84.8	KAEEGHSQNSDES;EGHSQNSDESSLG	K.AEEGHSQNSDESSLGK.L	GATOR complex protein DEPDC5						0.057	0.049	0.115	0.129	0.161	0.147	0.124	0.089	0.104	0.009	0.016	0.09	0.086	0.117	0.089	0.1	0.104	0.084	0.082	0.094	0.077	0.077	0.054	0.044	0.141	0.121	0.169	0.161	0.109	0.077	0.103	0.007	0.013
3383	Form_4159	DEPDC5	LOC108716023	gnl|gene42480|XL-9_2-gene42480|rna85409|	1068;1074	57.7	VSDPALTPTYVDS;TPTYVDSPRKDGA	K.VSSQVSDPALTPTYVDSPR.K	GATOR complex protein DEPDC5	GN:DEPDC5|DEPDC5|human|O75140	0	1085	TPTYMDSPRKDGA	NaN	0.02	0.088	0.13	0.157	0.129	0.131	0.108	0.111	0.088	0.017	0.021	0.09	0.086	0.117	0.089	0.1	0.104	0.084	0.082	0.094	0.077	0.077	0.019	0.08	0.161	0.148	0.136	0.144	0.096	0.096	0.087	0.014	0.017
3384	Form_4158	DEPDC5	LOC108716023	gnl|gene42480|XL-9_2-gene42480|rna85409|	1088	5000	FVEFVRSPRTAPS	K.DGAFFVEFVRSPR.T	GATOR complex protein DEPDC5	GN:DEPDC5|DEPDC5|human|O75140	0	1099	FMEFVRSPRTASS	NaN	0.027	0.027	0.027	0.032	0.041	0.038	0.254	0.287	0.151	0.034	0.082	0.09	0.086	0.117	0.089	0.1	0.104	0.084	0.082	0.094	0.077	0.077	0.028	0.027	0.036	0.033	0.047	0.046	0.246	0.271	0.163	0.03	0.073
1049	Form_1294	DGAT1	dgat1.L	gnl|gene14809|XL-9_2-gene14809|rna43202|	28	28	HCPPDKSPHAGDT	R.VLSVSHCPPDKSPHAGDTDK.V	Diacylglycerol O-acyltransferase 1						0.005	0.007	0.11	0.12	0.122	0.159	0.121	0.15	0.173	0.018	0.016	0.103	0.091	0.11	0.098	0.109	0.092	0.09	0.072	0.075	0.074	0.085	0.006	0.007	0.134	0.13	0.147	0.162	0.121	0.12	0.144	0.015	0.015
2517	Form_3106	DGCR8	LOC108716057	gnl|gene3330|XL-9_2-gene3330|rna9681|	273;277	77.4	EKYDIDSDHQSDG;IDSDHQSDGESSV	K.YDIDSDHQSDGESSVQPMVTK.I	Microprocessor complex subunit DGCR8						0.09	0.085	0.142	0.117	0.114	0.124	0.108	0.101	0.107	0.006	0.007	0.113	0.097	0.086	0.085	0.088	0.088	0.085	0.084	0.083	0.093	0.098	0.114	0.092	0.137	0.111	0.112	0.122	0.103	0.095	0.099	0.006	0.008
4445	Form_5453	DHODH	dhodh.L	gnl|gene604|XL-9_2-gene604|rna1771|	401	5000	INAHQPSPVKxxx	R.INAHQPSPVK.-	Dihydroorotate dehydrogenase (quinone), mitochondrial						0.02	0.018	0.092	0.086	0.111	0.128	0.12	0.133	0.169	0.061	0.062	0.095	0.096	0.103	0.097	0.094	0.095	0.09	0.088	0.087	0.076	0.078	0.021	0.019	0.105	0.092	0.115	0.134	0.119	0.129	0.162	0.051	0.053
1069	Form_1324	DHRS7B	dhrs7b.L	gnl|gene14951|XL-9_2-gene14951|rna43632|	252	45.6	AVTGDGSGYGVMD	K.TNLSLNAVTGDGSGYGVMDK.N	Dehydrogenase/reductase SDR family member 7B	GN:DHRS7B|DHRS7B|human|Q6IAN0	0	254	AITADGSRYGVMD	NaN	0.003	0.003	0.048	0.077	0.132	0.123	0.155	0.157	0.292	0.002	0.01	0.092	0.101	0.094	0.095	0.089	0.104	0.08	0.089	0.075	0.096	0.085	0.003	0.003	0.052	0.085	0.136	0.149	0.144	0.162	0.254	0.002	0.01
2456	Form_3028	DHTKD1	dhtkd1.L	gnl|gene3070|XL-9_2-gene3070|rna8892|	315	14.1	TRARQQSLSDGDY	R.ARQQSLSDGDYSTESSAQPGDK.V	Probable 2-oxoglutarate dehydrogenase E1 component DHKTD1, mitochondrial	GN:DHTKD1|DHTKD1|human|Q96HY7	0	307	TRGRQQSRQDGDY	NaN	0.07	0.071	0.11	0.087	0.144	0.109	0.139	0.103	0.148	0.007	0.01	0.081	0.087	0.092	0.088	0.085	0.089	0.088	0.094	0.081	0.112	0.105	0.065	0.071	0.116	0.087	0.14	0.111	0.14	0.111	0.137	0.009	0.012
2159	Form_2640	DHX15	dhx15.S	gnl|gene20464|XL-9_2-gene20464|rna59767|	63	23.1	SRGSSNSPYIPAG	R.GSSNSPYIPAGGMPTLK.P	Pre-mRNA-splicing factor ATP-dependent RNA helicase DHX15						0.053	0.05	0.25	0.227	0.089	0.111	0.058	0.06	0.047	0.017	0.039	0.087	0.086	0.081	0.086	0.09	0.083	0.1	0.094	0.095	0.1	0.1	0.053	0.049	0.232	0.224	0.092	0.106	0.066	0.065	0.051	0.019	0.045
31	Form___50	DHX16	dhx16.S	gnl|gene100|XL-9_2-gene100|rna281|	100	137.2	YTLLEDSEEEEKP	K.SYTLLEDSEEEEK.P	RNA helicase						0.115	0.07	0.125	0.132	0.122	0.137	0.088	0.11	0.095	0.002	0.003	0.075	0.075	0.077	0.083	0.08	0.082	0.094	0.095	0.089	0.127	0.122	0.104	0.063	0.116	0.132	0.117	0.135	0.099	0.125	0.102	0.003	0.005
32	Form___49	DHX16	dhx16.S	gnl|gene100|XL-9_2-gene100|rna281|	141;145	5000	QTTKVPSPQNTSE;VPSPQNTSEDEDE	K.VPSPQNTSEDEDEREELAR.L	RNA helicase						0.014	0.012	0.021	0.017	0.02	0.014	0.021	0.026	0.042	0.331	0.481	0.075	0.075	0.077	0.083	0.08	0.082	0.094	0.095	0.089	0.127	0.122	0.009	0.008	0.014	0.012	0.014	0.01	0.017	0.021	0.032	0.36	0.502
32	Form___51	DHX16	dhx16.S	gnl|gene100|XL-9_2-gene100|rna281|	141	5000	QTTKVPSPQNTSE	K.VPSPQNTSEDEDEREELAR.L	RNA helicase						0.011	0.008	0.018	0.007	0.023	0.027	0.02	0.033	0.024	0.32	0.509	0.075	0.075	0.077	0.083	0.08	0.082	0.094	0.095	0.089	0.127	0.122	0.007	0.005	0.012	0.005	0.016	0.019	0.016	0.027	0.018	0.346	0.529
5029	Form_6155	DHX29	dhx29.L	gnl|gene8765|XL-9_2-gene8765|rna25514|	201	15.6	PSAANESATEKGE	K.FQAPPQRPSAANESATEK.G	ATP-dependent RNA helicase DHX29						0.005	0.011	0.147	0.141	0.125	0.154	0.127	0.146	0.135	0.005	0.006	0.094	0.093	0.105	0.092	0.097	0.096	0.089	0.088	0.09	0.075	0.082	0.005	0.011	0.164	0.138	0.129	0.157	0.12	0.137	0.129	0.004	0.005
5030	Form_6154	DHX29	dhx29.L	gnl|gene8765|XL-9_2-gene8765|rna25514|	232	55	RYAEQGSDDDDDD	R.YAEQGSDDDDDDDDDDVK.E	ATP-dependent RNA helicase DHX29						0.071	0.066	0.113	0.118	0.131	0.123	0.112	0.119	0.133	0.005	0.009	0.094	0.093	0.105	0.092	0.097	0.096	0.089	0.088	0.09	0.075	0.082	0.071	0.066	0.127	0.116	0.136	0.126	0.107	0.112	0.128	0.004	0.008
393	Form__507	DHX34	dhx34.L	gnl|gene11817|XL-9_2-gene11817|rna34312|	774	5000	HTDRKDSIDIQDV	K.DSIDIQDVK.F	Probable ATP-dependent RNA helicase DHX34						0.026	0.022	0.129	0.115	0.132	0.118	0.135	0.151	0.159	0.003	0.008	0.087	0.088	0.078	0.094	0.101	0.119	0.09	0.091	0.077	0.088	0.087	0.025	0.021	0.11	0.118	0.146	0.154	0.133	0.15	0.134	0.003	0.008
2913	Form_3586	DHX36	LOC108718124	gnl|gene37870|XL-9_2-gene37870|rna78750|	21	37.4	RRGRARSFSSQYE	R.SFSSQYESGSVENPR.G	ATP-dependent DNA/RNA helicase DHX36						0.021	0.027	0.138	0.131	0.148	0.127	0.111	0.116	0.16	0.01	0.011	0.087	0.098	0.088	0.085	0.091	0.103	0.099	0.093	0.085	0.084	0.087	0.02	0.029	0.133	0.122	0.147	0.143	0.12	0.118	0.149	0.009	0.01
2914	Form_3587	DHX36	LOC108718124	gnl|gene37870|XL-9_2-gene37870|rna78750|	118	51.5	NERNNVSPQLRQP	R.NNVSPQLRQPASSEVK.D	ATP-dependent DNA/RNA helicase DHX36						0.02	0.016	0.099	0.125	0.134	0.118	0.105	0.111	0.132	0.077	0.064	0.087	0.098	0.088	0.085	0.091	0.103	0.099	0.093	0.085	0.084	0.087	0.019	0.017	0.096	0.117	0.134	0.133	0.114	0.113	0.123	0.071	0.061
2964	Form_3646	DHX37	dhx37.L	gnl|gene38454|XL-9_2-gene38454|rna79604|	234	91.4	FIPVDRSPDIQEA	K.KPSEIPSSQPAIFIPVDRSPDIQEAR.L	Probable ATP-dependent RNA helicase DHX37 (Fragment)	GN:DHX37|DHX37|human|Q8IY37	0	242	FIPVNRSPEMQEE	NaN	0.087	0.063	0.06	0.1	0.083	0.081	0.107	0.113	0.116	0.075	0.116	0.09	0.096	0.087	0.084	0.088	0.092	0.085	0.093	0.086	0.095	0.105	0.086	0.066	0.057	0.092	0.08	0.082	0.1	0.115	0.11	0.078	0.134
2965	Form_3645	DHX37	dhx37.L	gnl|gene38454|XL-9_2-gene38454|rna79604|	496	115.1	RNVHNVTEDDESQ	R.NVHNVTEDDESQEVVR.R	Probable ATP-dependent RNA helicase DHX37 (Fragment)						0.135	0.085	0.178	0.115	0.089	0.088	0.055	0.053	0.074	0.043	0.085	0.09	0.096	0.087	0.084	0.088	0.092	0.085	0.093	0.086	0.095	0.105	0.134	0.09	0.171	0.107	0.087	0.09	0.052	0.055	0.07	0.045	0.099
1535	Form_1884	DHX38	dhx38.L	gnl|gene17348|XL-9_2-gene17348|rna50639|	233	23.2	QRSQWESPSPAPS	R.SQWESPSPAPSNR.D	Pre-mRNA-splicing factor ATP-dependent RNA helicase PRP16	GN:DHX38|DHX38|human|Q92620	0	232	RRSQWESPSPTPS	NaN	0.009	0.005	0.208	0.115	0.121	0.136	0.144	0.131	0.119	0.005	0.008	0.074	0.08	0.083	0.081	0.086	0.096	0.1	0.107	0.101	0.091	0.1	0.007	0.004	0.186	0.1	0.112	0.141	0.155	0.151	0.129	0.005	0.009
3487	Form_4289	DHX38	LOC108715422	gnl|gene43196|XL-9_2-gene43196|rna86480|	215	50.8	SQWESPSPAPSNK	R.SQWESPSPAPSNK.D	Pre-mRNA-splicing factor ATP-dependent RNA helicase PRP16	GN:DHX38|DHX38|human|Q92620	0	234	SQWESPSPTPSYR	NaN	0.009	0.01	0.131	0.07	0.125	0.121	0.127	0.114	0.115	0.065	0.114	0.105	0.093	0.111	0.103	0.084	0.088	0.087	0.091	0.09	0.078	0.071	0.011	0.01	0.162	0.08	0.117	0.119	0.123	0.116	0.115	0.057	0.09
2548	Form_3141	DHX9	LOC108715635	gnl|gene34353|XL-9_2-gene34353|rna73880|	90	39.3	GAEQGDSIDGAPI	R.SDEVPLLGAEQGDSIDGAPIK.S	ATP-dependent RNA helicase A						0.042	0.026	0.114	0.14	0.145	0.153	0.132	0.152	0.08	0.007	0.008	0.095	0.089	0.089	0.087	0.089	0.086	0.096	0.099	0.095	0.086	0.089	0.044	0.025	0.111	0.133	0.141	0.144	0.138	0.164	0.083	0.007	0.008
3669	Form_4511	DIABLO	diablo.L	gnl|gene45126|XL-9_2-gene45126|rna89359|	231	57.2	SPRNSLSEEEDIP	R.NSLSEEEDIPEAYLR.E	Diablo homolog, mitochondrial						0.06	0.033	0.079	0.079	0.112	0.114	0.151	0.129	0.232	0.001	0.01	0.093	0.095	0.097	0.099	0.092	0.098	0.087	0.098	0.081	0.076	0.085	0.061	0.034	0.084	0.086	0.113	0.122	0.144	0.139	0.206	0.001	0.009
3915	Form_4810	DIABLO	LOC108705716	gnl|gene47609|XL-9_2-gene47609|rna92820|	245	27.6	SPRSSLSEEEEIP	R.SSLSEEEEIPEAYLR.E	Diablo homolog, mitochondrial						0.063	0.045	0.09	0.092	0.108	0.121	0.138	0.148	0.18	0.001	0.012	0.092	0.089	0.084	0.097	0.095	0.091	0.093	0.086	0.093	0.088	0.093	0.064	0.044	0.083	0.098	0.113	0.121	0.141	0.14	0.184	0.001	0.012
[truncated: 4,440 more rows]

## Sheet: Class I
P_Set	P_Form	class	GeneSymbol	GeneSymbol_Xenbase	Protein_Reference	Phosphosite_Position	Phosphosite_LocalizeScore	Phosphosite_Motif	Peptide_Sequence	GeneSymbol_More	PP_Reference	PP_Match	Human_Residue	Human_Motif	detrended P level	0	2	3	4	5	6	7	8	9	pp1	pp2
[truncated: 136 more rows]

## Sheet: Class II
P_Set	P_Form	GeneSymbol	GeneSymbol_Xenbase	Protein_Reference	Phosphosite_Position	Phosphosite_LocalizeScore	Phosphosite_Motif	Peptide_Sequence	GeneSymbol_More	PP_Reference	PP_Match	Human_Residue	Human_Motif	detrended P level	0	2	3	4	5	6	7	8	9	pp1	pp2
[truncated: 2,167 more rows]

[truncated: 3 more sheets: Class III, Class IV, Class V]
