# Supplementary material for: Decoding protein phosphorylation during oocyte meiotic divisions using phosphoproteomics
Source: eLife. 2025 Jul 17;13:RP104255. doi: 10.7554/eLife.104255 (PMC12270485; doi:10.7554/eLife.104255)
Supplement: Supplementary file 4. [file elife-104255-supp4.xlsx]

## Sheet: Appendix 5_Dataset 4_eLife
Set_1020-gene14670_LIG1_3_forms_occ
Set_1047-gene147_C18orf32_2_forms_occ
Set_104-gene10447_BCL9_2_forms_occ
Set_105-gene10447_BCL9_3_forms_occ
Set_1072-gene14983_CCT3_2_forms_occ
Set_1088-gene15043_ITPR1_2_forms_occ
Set_108-gene10448_SLC9A3R1_2_forms_occ
Set_1100-gene15105_MYO5A_2_forms_occ
Set_1109-gene15138_ARFGAP3_2_forms_occ
Set_1133-gene15282_RCOR2_2_forms_occ
Set_1135-gene15282_RCOR2_2_forms_occ
Set_1154-gene1547_GATAD2A_2_forms_occ
Set_1168-gene15554_CFL1_2_forms_occ
Set_1172-gene1557_CDC27_2_forms_occ
Set_1198-gene15713_HSP90B1_2_forms_occ
Set_11-gene10054_TTC5_2_forms_occ
Set_1204-gene15721_TSC2_3_forms_occ
Set_1231-gene15855_DAPL1_2_forms_occ
Set_1276-gene16099_PRRC2C_2_forms_occ
Set_1285-gene16144_ARHGEF10_2_forms_occ
Set_1298-gene161_SRRM2_2_forms_occ
Set_12-gene10056_PARN_2_forms_occ
Set_1309-gene161_SRRM2_2_forms_occ
Set_1328-gene16275_NANS_2_forms_occ
Set_1352-gene16392_HABP4_2_forms_occ
Set_1356-gene16392_HABP4_2_forms_occ
Set_1364-gene1645_TPR_2_forms_occ
Set_1366-gene1645_TPR_2_forms_occ
Set_1372-gene16469_DBN1_2_forms_occ
Set_1377-gene16493_TPBG_2_forms_occ
Set_1396-gene16604_NRBP1_2_forms_occ
Set_1399-gene16608_TRIP4_2_forms_occ
Set_1400-gene16609_PDIA6_2_forms_occ
Set_1410-gene16659_EIF3K_2_forms_occ
Set_1411-gene16662_MAP2K1_2_forms_occ
Set_1418-gene16701_TFRC_2_forms_occ
Set_1419-gene16715_GRHPR_2_forms_occ
Set_1429-gene16797_CFDP1_2_forms_occ
Set_1430-gene16797_CFDP1_2_forms_occ
Set_1461-gene16997_SYTL2_2_forms_occ
Set_1466-gene16997_SYTL2_2_forms_occ
Set_146-gene10620_ZNF326_2_forms_occ
Set_1497-gene17169_RPS6KA1_2_forms_occ
Set_152-gene10686_VAPB_2_forms_occ
Set_1533-gene17340_LAMTOR1_2_forms_occ
Set_1562-gene17483_BTRC_2_forms_occ
Set_1566-gene17521_SZRD1_2_forms_occ
Set_1584-gene17561_PAK2_2_forms_occ
Set_158-gene10708_NACA_2_forms_occ
Set_1601-gene17652_TIAM1_2_forms_occ
Set_1604-gene17669_NUP42_2_forms_occ
Set_1606-gene17672_OSBP_2_forms_occ
Set_1617-gene17769_DAXX_2_forms_occ
Set_161-gene10708_NACA_2_forms_occ
Set_1644-gene17926_CHD4_2_forms_occ
Set_1664-gene17_PHPT1_2_forms_occ
Set_1669-gene18022_GPALPP1_2_forms_occ
Set_1671-gene18046_RPL9_2_forms_occ
Set_1681-gene18132_POLD1_2_forms_occ
Set_1685-gene18158_MARCKSL1_2_forms_occ
Set_1693-gene18171_RRM2_2_forms_occ
Set_1699-gene18213_LSM14A_2_forms_occ
Set_1720-gene18340_HSPA8_2_forms_occ
Set_172-gene10718_EIF4ENIF1_2_forms_occ
Set_1752-gene18459_CDC20_2_forms_occ
Set_1755-gene18461_HDLBP_3_forms_occ
Set_1817-gene18677_HIRA_2_forms_occ
Set_181-gene10765_MAP1B_2_forms_occ
Set_1823-gene1870_PRRC2B_3_forms_occ
Set_1829-gene1874_DBNL_2_forms_occ
Set_1851-gene18830_IGF2BP3_2_forms_occ
Set_1878-gene19043_UBAP2_2_forms_occ
Set_1893-gene19107_CEP192_2_forms_occ
Set_1951-gene19377_SNRNP27_2_forms_occ
Set_1969-gene19444__2_forms_occ
Set_1975-gene19492_DDX19A_2_forms_occ
Set_1983-gene19576_STIP1_2_forms_occ
Set_1990-gene19623_EPRS1_2_forms_occ
Set_1993-gene19644_MTA2_2_forms_occ
Set_2006-gene19690_PCLAF_2_forms_occ
Set_2041-gene19797_KNOP1_2_forms_occ
Set_2043-gene19819_SMYD4_2_forms_occ
Set_2050-gene19834_SF3B1_2_forms_occ
Set_2069-gene19906_CKAP5_2_forms_occ
Set_2073-gene1991_KPNA2_2_forms_occ
Set_2090-gene2002_VARS1_2_forms_occ
Set_2100-gene20086_ZAR1L_2_forms_occ
Set_2105-gene20116_RPLP2_2_forms_occ
Set_2122-gene20247_CERT1_2_forms_occ
Set_2148-gene20417_ABCC1_2_forms_occ
Set_2158-gene20463_NAGK_2_forms_occ
Set_2162-gene20475_CNOT2_2_forms_occ
Set_2163-gene20475_CNOT2_3_forms_occ
Set_2166-gene20490_CCDC9_2_forms_occ
Set_216-gene1101_LMO7_2_forms_occ
Set_217-gene1101_LMO7_2_forms_occ
Set_2180-gene2151_RBM44_2_forms_occ
Set_21-gene10089_CHAF1A_2_forms_occ
Set_2211-gene2281_EPB41L3_2_forms_occ
Set_2253-gene2411_PPP2R5C_2_forms_occ
Set_2255-gene2411_PPP2R5C_2_forms_occ
Set_2265-gene2441_MAP4_2_forms_occ
Set_2291-gene2504_LIMA1_2_forms_occ
Set_2332-gene2615_GLIPR2_2_forms_occ
Set_233-gene11082_PXN_3_forms_occ
Set_2359-gene27112_GEMIN5_2_forms_occ
Set_2370-gene2711_COBLL1_2_forms_occ
Set_2373-gene2711_COBLL1_2_forms_occ
Set_2375-gene2711_COBLL1_2_forms_occ
Set_2376-gene2711_COBLL1_2_forms_occ
Set_2392-gene2773_DYNC1LI2_4_forms_occ
Set_2399-gene2848_PAAT_2_forms_occ
Set_240-gene11103_ERCC6L_3_forms_occ
Set_2416-gene2919_NPM1_2_forms_occ
Set_2417-gene2919_NPM1_2_forms_occ
Set_2418-gene2919_NPM1_2_forms_occ
Set_2420-gene293_SIVA1_2_forms_occ
Set_2433-gene3005_GORASP2_2_forms_occ
Set_2448-gene30322_PGM1_2_forms_occ
Set_245-gene11108_AHNAK_2_forms_occ
Set_2479-gene3206_TOP2B_2_forms_occ
Set_2489-gene324_AHCTF1_2_forms_occ
Set_248-gene11108_AHNAK_2_forms_occ
Set_2495-gene324_AHCTF1_2_forms_occ
Set_2497-gene324_AHCTF1_2_forms_occ
Set_2513-gene3310_SSB_2_forms_occ
Set_2522-gene3365_DAPL1_2_forms_occ
Set_2529-gene3368_ALDOC_2_forms_occ
Set_2530-gene3370_HBZ_2_forms_occ
Set_2531-gene3370_HBZ_2_forms_occ
Set_2542-gene3389_MAP4K4_2_forms_occ
Set_2543-gene3389_MAP4K4_2_forms_occ
Set_2546-gene3414_CARHSP1_2_forms_occ
Set_256-gene11114_SALL4_2_forms_occ
Set_2579-gene34584_TICRR_2_forms_occ
Set_2597-gene34675_PRKCD_3_forms_occ
Set_2612-gene34761_XIAP_2_forms_occ
Set_2639-gene35035_VAMP3_2_forms_occ
Set_263-gene11188_RPA2_2_forms_occ
Set_2643-gene35046_BIRC6_2_forms_occ
Set_2661-gene35231_MKRN1_2_forms_occ
Set_2665-gene35267_DUT_2_forms_occ
Set_2667-gene3528_APC_2_forms_occ
Set_2670-gene35322_OTULIN_2_forms_occ
Set_2690-gene35453_UBE2O_4_forms_occ
Set_2691-gene35472_POLE_2_forms_occ
Set_270-gene1123_PAN2_2_forms_occ
Set_2728-gene35806_SYTL2_2_forms_occ
Set_274-gene11253_ILRUN_2_forms_occ
Set_2754-gene36028_ZC2HC1A_2_forms_occ
Set_2764-gene36278_TTC5_2_forms_occ
Set_2765-gene36306_SPAG5_2_forms_occ
Set_276-gene11281_CCS_2_forms_occ
Set_2772-gene36365_ATAD2_2_forms_occ
Set_2775-gene36387_TRMT1L_2_forms_occ
Set_2812-gene36827_GATAD2A_2_forms_occ
Set_2814-gene36827_GATAD2A_2_forms_occ
Set_2827-gene36869_CDCA3_2_forms_occ
Set_2839-gene37025_GRAMD2B_2_forms_occ
Set_2842-gene37042_NUP210_3_forms_occ
Set_2856-gene37341_UTRN_2_forms_occ
Set_2870-gene37417_GYG1_2_forms_occ
Set_2877-gene37483_HNRNPM_2_forms_occ
Set_2889-gene37602_PADI2_2_forms_occ
Set_2896-gene37780_SLC4A1AP_2_forms_occ
Set_2908-gene37837_NAA50_2_forms_occ
Set_2918-gene37989_KLC1_2_forms_occ
Set_2929-gene38124_LSM12_2_forms_occ
Set_293-gene11455_UTP14A_2_forms_occ
Set_2959-gene3836_STX4_2_forms_occ
Set_2963-gene38436_DVL2_2_forms_occ
Set_2986-gene38671_UHRF1_2_forms_occ
Set_3006-gene38901_TMPO_2_forms_occ
Set_3011-gene38932_LPP_2_forms_occ
Set_3019-gene38978_EIF4B_2_forms_occ
Set_3022-gene39013_KDM3B_2_forms_occ
Set_3035-gene39138_PCBP2_2_forms_occ
Set_3044-gene39222_LRIF1_2_forms_occ
Set_3058-gene39525_TJP1_2_forms_occ
Set_305-gene11519_DDX25_2_forms_occ
Set_3062-gene39525_TJP1_2_forms_occ
Set_3089-gene3975_UFD1_3_forms_occ
Set_3099-gene39881_OGFR_2_forms_occ
Set_3105-gene39894_RTN4_2_forms_occ
Set_3111-gene39966_CDK13_2_forms_occ
Set_3113-gene4002_ADNP_2_forms_occ
Set_311-gene11531_POLR2A_2_forms_occ
Set_3123-gene40142_GPHN_2_forms_occ
Set_3128-gene40201_APOB_2_forms_occ
Set_3129-gene40201_APOB_2_forms_occ
Set_3195-gene40915_TLE1_2_forms_occ
Set_3198-gene40955_SMG1_2_forms_occ
Set_3212-gene41077_HIRIP3_2_forms_occ
Set_3249-gene41539_LAMTOR1_2_forms_occ
Set_3250-gene41566_SNX17_2_forms_occ
Set_3262-gene4172_CHFR_2_forms_occ
Set_3266-gene4173_G3BP2_2_forms_occ
Set_3287-gene41910_SF3A1_2_forms_occ
Set_3312-gene4201_MARCKS_2_forms_occ
Set_3338-gene42136_ANKRD17_2_forms_occ
Set_3346-gene42294_PSMA5_2_forms_occ
Set_3349-gene42308_MAP7D1_2_forms_occ
Set_3356-gene4232_INTS12_2_forms_occ
Set_3358-gene42337_SUPT5H_2_forms_occ
Set_3359-gene42337_SUPT5H_2_forms_occ
Set_3365-gene42372_ATXN2_2_forms_occ
Set_3416-gene4282_TBC1D5_2_forms_occ
Set_3438-gene42881_HCFC1_2_forms_occ
Set_3453-gene42994_NUP205_2_forms_occ
Set_3458-gene43040_PARG_2_forms_occ
Set_3466-gene43085_RAB11FIP1_2_forms_occ
Set_3474-gene43139__2_forms_occ
Set_347-gene11661_RIF1_2_forms_occ
Set_3480-gene43158_RFX1_2_forms_occ
Set_3486-gene43186_FLNB_2_forms_occ
Set_3489-gene43198_EEF1D_2_forms_occ
Set_3490-gene431_GTF2B_2_forms_occ
Set_3533-gene43763_USP10_2_forms_occ
Set_3537-gene43811__2_forms_occ
Set_3558-gene44055_SPAG9_2_forms_occ
Set_3562-gene44111_PABPC1_2_forms_occ
Set_358-gene11661_RIF1_2_forms_occ
Set_3596-gene44505_CAST_2_forms_occ
Set_359-gene11661_RIF1_2_forms_occ
Set_3606-gene44612_KTN1_2_forms_occ
Set_3616-gene44715_STRIP1_2_forms_occ
Set_3625-gene44756_ZYX_2_forms_occ
Set_3627-gene44756_ZYX_2_forms_occ
Set_3630-gene44756_ZYX_2_forms_occ
Set_3644-gene44927_TRIP12_2_forms_occ
Set_3652-gene44946_NUP98_2_forms_occ
Set_3653-gene45045_NUP54_2_forms_occ
Set_3666-gene45119_AKIRIN2_2_forms_occ
Set_3672-gene45202_SEH1L_2_forms_occ
Set_3729-gene4563_EIF4EBP2_2_forms_occ
Set_3733-gene45671_MTDH_2_forms_occ
Set_3735-gene45685_PPP1R37_2_forms_occ
Set_3742-gene45732_RTF1_2_forms_occ
Set_3747-gene4577_STK31_2_forms_occ
Set_3756-gene45948_CARS1_2_forms_occ
Set_3799-gene46437_CLIP1_2_forms_occ
Set_383-gene11773_SFPQ_3_forms_occ
Set_384-gene11773_SFPQ_2_forms_occ
Set_3852-gene46876_UBN2_2_forms_occ
Set_3859-gene4694_KIAA1143_2_forms_occ
Set_386-gene11773_SFPQ_2_forms_occ
Set_3882-gene47131_FLNA_2_forms_occ
Set_3883-gene47154_CCDC115_2_forms_occ
Set_3888-gene4725_GATD3B_2_forms_occ
Set_3898-gene47349_EPB41L3_3_forms_occ
Set_3907-gene47487_VPS36_3_forms_occ
Set_3913-gene47580_RABEP1_3_forms_occ
Set_3931-gene4767_NVL_2_forms_occ
Set_3962-gene4803__2_forms_occ
Set_3967-gene4804_TACC3_2_forms_occ
Set_3968-gene4804_TACC3_2_forms_occ
Set_3995-gene48319_STMN1_2_forms_occ
Set_3997-gene48334_INTS11_2_forms_occ
Set_4014-gene48576_POM121C_2_forms_occ
Set_4024-gene48761_IRAG2_2_forms_occ
Set_4031-gene48761_IRAG2_2_forms_occ
Set_4035-gene48860_PNN_2_forms_occ
Set_4044-gene48943_ZSWIM9_2_forms_occ
Set_404-gene11944_SYPL1_2_forms_occ
Set_4070-gene49536_SALL4_2_forms_occ
Set_4087-gene49639_AP2A2_2_forms_occ
Set_4105-gene49843_MAP4_2_forms_occ
Set_4109-gene49843_MAP4_3_forms_occ
Set_4110-gene49843_MAP4_2_forms_occ
Set_4111-gene49843_MAP4_2_forms_occ
Set_4125-gene4994_CCT8_2_forms_occ
Set_4143-gene50038_WDR13_2_forms_occ
Set_414-gene1197_TOPBP1_2_forms_occ
Set_416-gene1197_TOPBP1_2_forms_occ
Set_417-gene1197_TOPBP1_2_forms_occ
Set_4235-gene50891_CCDC22_2_forms_occ
Set_424-gene11983_GOLGA4_2_forms_occ
Set_4263-gene5116_ZAR1L_2_forms_occ
Set_428-gene12006_EIF3H_2_forms_occ
Set_4315-gene5251_ZC3H7A_2_forms_occ
Set_4329-gene5311_RAB4B_2_forms_occ
Set_4330-gene5325_NUP35_2_forms_occ
Set_4331-gene5325_NUP35_3_forms_occ
Set_4346-gene5422_SRRM1_3_forms_occ
Set_4367-gene5578_TAF5_2_forms_occ
Set_4372-gene5604_GIT1_2_forms_occ
Set_438-gene12054_NUP153_2_forms_occ
Set_4397-gene5786_MMS22L_2_forms_occ
Set_440-gene12054_NUP153_2_forms_occ
Set_4435-gene5997_CSTF2_2_forms_occ
Set_4436-gene5997_CSTF2_2_forms_occ
Set_4445-gene604_DHODH_2_forms_occ
Set_4446-gene6064_EML4_2_forms_occ
Set_4449-gene6064_EML4_2_forms_occ
Set_4460-gene6175__2_forms_occ
Set_4482-gene6245_PSEN1_2_forms_occ
Set_4503-gene6349_XPO4_3_forms_occ
Set_451-gene120_PAF1_2_forms_occ
Set_4521-gene637_ZNF839_2_forms_occ
Set_4537-gene6509_EIF2S2_2_forms_occ
Set_4552-gene6548_EIF4ENIF1_2_forms_occ
Set_4574-gene6687__2_forms_occ
Set_4577-gene6704_RPL6_2_forms_occ
Set_4584-gene6726_TATDN2_2_forms_occ
Set_458-gene12108_NUCKS1_2_forms_occ
Set_4604-gene6826_NUP153_2_forms_occ
Set_4612-gene6870_NME2_2_forms_occ
Set_4617-gene6880_LSM14A_2_forms_occ
Set_4618-gene6880_LSM14A_2_forms_occ
Set_4650-gene7100_DENND4C_2_forms_occ
Set_4654-gene7116_RPS3_2_forms_occ
Set_466-gene1216_RABGAP1L_2_forms_occ
Set_4673-gene7201_KRTCAP2_2_forms_occ
Set_4675-gene7213_ZAR1L_2_forms_occ
Set_467-gene12172_STAMBPL1_2_forms_occ
Set_4690-gene7324_OXR1_2_forms_occ
Set_4699-gene7366_SNX30_2_forms_occ
Set_4706-gene7451_MAP4K4_2_forms_occ
Set_470-gene12198_TSC1_2_forms_occ
Set_4717-gene7504_RGPD5_3_forms_occ
Set_4722-gene7504_RGPD5_2_forms_occ
Set_4728-gene7509_RNASEH2B_2_forms_occ
Set_4735-gene7538_BOLA1_2_forms_occ
Set_4738-gene7578_NEDD4L_2_forms_occ
Set_4748-gene760_SEC24D_2_forms_occ
Set_475-gene12201_PLIN2_2_forms_occ
Set_4764-gene7734_PICALM_2_forms_occ
Set_476-gene12201_PLIN2_2_forms_occ
Set_477-gene12201_PLIN2_2_forms_occ
Set_4783-gene780_CIRBP_2_forms_occ
Set_4786-gene7820_CNNM4_2_forms_occ
Set_4812-gene7954_SRRM2_2_forms_occ
Set_4817-gene7954_SRRM2_2_forms_occ
Set_4820-gene7954_SRRM2_2_forms_occ
Set_4829-gene7954_SRRM2_2_forms_occ
Set_482-gene12224_H2AC21_2_forms_occ
Set_4841-gene7961_PCM1_2_forms_occ
Set_4843-gene7961_PCM1_2_forms_occ
Set_4845-gene7961_PCM1_2_forms_occ
Set_4870-gene8097_TARDBP_2_forms_occ
Set_4883-gene814_SUGT1_2_forms_occ
Set_4895-gene8200_HSPD1_2_forms_occ
Set_4896-gene8200_HSPD1_2_forms_occ
Set_4901-gene8214_EIF4G1_2_forms_occ
Set_4909-gene8218_NUP155_2_forms_occ
Set_490-gene1223_WFS1_2_forms_occ
Set_4949-gene8345_MTDH_2_forms_occ
Set_4952-gene8349_PLK1_2_forms_occ
Set_4957-gene8388_RASA1_2_forms_occ
Set_495-gene1224_CHAF1B_2_forms_occ
Set_4991-gene853_RRM1_2_forms_occ
Set_4995-gene8564_CWF19L1_2_forms_occ
Set_5020-gene8724_TAX1BP1_2_forms_occ
Set_5031-gene8766_NCAPG_2_forms_occ
Set_5036-gene8773_GTF3C5_2_forms_occ
Set_5043-gene879_MED25_2_forms_occ
Set_5048-gene8804_EIF4B_2_forms_occ
Set_5065-gene8877_CNOT1_2_forms_occ
Set_5067-gene888_ZC3H10_2_forms_occ
Set_5084-gene8965_IGF2BP3_3_forms_occ
Set_5093-gene9005_ZNF638_2_forms_occ
Set_5111-gene9095_TES_2_forms_occ
Set_5129-gene9176_MSH6_2_forms_occ
Set_5162-gene9319_MAP7D2_2_forms_occ
Set_5172-gene9424_TRIM69_2_forms_occ
Set_517-gene12353_PDIA3_2_forms_occ
Set_5183-gene9520_EIF5B_4_forms_occ
Set_5191-gene9547_CAPRIN1_2_forms_occ
Set_5219-gene9739_EIF3E_2_forms_occ
Set_5223-gene9758_VDAC2_2_forms_occ
Set_523-gene12383_DDX20_2_forms_occ
Set_5254-gene9959_HECTD1_2_forms_occ
Set_5262-gene9976_BAZ1A_3_forms_occ
Set_534-gene1240_ZMYM3_2_forms_occ
Set_557-gene12552_RAD23B_2_forms_occ
Set_574-gene12684_KHSRP_2_forms_occ
Set_594-gene12783_EPN1_2_forms_occ
Set_606-gene12851_NCAPG2_2_forms_occ
Set_608-gene12859_DLGAP5_2_forms_occ
Set_611-gene12859_DLGAP5_3_forms_occ
Set_61-gene10220_RPAP3_2_forms_occ
Set_624-gene12933_ERCC5_2_forms_occ
Set_627-gene1294_MACF1_2_forms_occ
Set_63-gene10223_RPA1_2_forms_occ
Set_653-gene13105_YWHAE_2_forms_occ
Set_659-gene13125_ARPP19_2_forms_occ
Set_65-gene10229_PDHA1_3_forms_occ
Set_673-gene13162_CASC3_2_forms_occ
Set_675-gene13164_NDC1_2_forms_occ
Set_677-gene13164_NDC1_2_forms_occ
Set_684-gene13196_FUBP1_2_forms_occ
Set_687-gene13209_LIG3_2_forms_occ
Set_715-gene1329_SOS1_2_forms_occ
Set_734-gene1340_POF1B_2_forms_occ
Set_750-gene13430_MKI67_2_forms_occ
Set_753-gene13430_MKI67_2_forms_occ
Set_764-gene13473_SNRNP200_2_forms_occ
Set_803-gene13707_PGM3_2_forms_occ
Set_830-gene13876_GTF2F1_2_forms_occ
Set_839-gene13901_tr|H3BNC9|H3BNC9_HUMAN_2_forms_occ
Set_854-gene1394_PYM1_2_forms_occ
Set_882-gene14100_tr|F5H5P2|F5H5P2_HUMAN_2_forms_occ
Set_884-gene14116_YBX2_2_forms_occ
Set_917-gene14314_TOM1_2_forms_occ
Set_927-gene14340_DDX6_2_forms_occ
Set_957-gene14482_PLIN2_2_forms_occ
Set_966-gene14504_RGPD4_2_forms_occ
Set_967-gene14504_RGPD4_2_forms_occ
Set_970-gene14504_RGPD4_2_forms_occ
Set_977-gene14522_KRT18_2_forms_occ
Set_984-gene14565_TDRD1_2_forms_occ
Set_990-gene14579_PKM_2_forms_occ
Set_996-gene14620_FLNA_2_forms_occ
Set_999-gene14635_CNDP2_2_forms_occ
Set_99-gene10424_DCTD_2_forms_occ
