# Supplementary material for: Decoding protein phosphorylation during oocyte meiotic divisions using phosphoproteomics
Source: eLife. 2025 Jul 17;13:RP104255. doi: 10.7554/eLife.104255 (PMC12270485; doi:10.7554/eLife.104255)
Supplement: Supplementary file 5. [file elife-104255-supp5.xlsx]

## Sheet: Sheet1
Mouse ID	Xenopus ID	Mouse Pos	Xenopus Pos	Mouse Seq	Xenopus Seq		MII/GV FC Mouse	MII/PRO FC Xenopus	Mouse log2(MII/GV)	Xenopus log2(MII/PRO)
sp|Q8BRF7|SCFD1_MOUSE	gnl|gene14900|XL-9_2-gene14900|rna43491|	300	293	STGVENSPAGARP	APAVESSPSGARP	SCFD1-mus300-xen293	2.72	7.4	1.44361	2.88753
sp|P35761|TTK_MOUSE	gnl|gene19328|XL-9_2-gene19328|rna56463|	435	459	PKADKESPPISVP	PGSRRVSPPAPSL	TTK-mus435-xen459	6.87	5.36111	2.78031	2.42253
sp|Q9Z2U1|PSA5_MOUSE	gnl|gene42294|XL-9_2-gene42294|rna85137|	16	16	RGVNTFSPEGRLF	RGVNTFSPEGRLF	PSA5-mus16-xen16	7.352	10.7333	2.87814	3.42403
sp|P11157|RIR2_MOUSE	gnl|gene12101|XL-9_2-gene12101|rna35149|	20	16	QQQLQLSPLKRLT	ELNENVSPMKNLT	RIR2-mus20-xen16	2.084	5.75758	1.05936	2.52546
sp|Q01320|TOP2A_MOUSE	gnl|gene3206|XL-9_2-gene3206|rna9276|	1211	1208	CADVLPSPRGKRV	LQEIMPSPHGRRV	TOP2A-mus1211-xen1208	1.777	4.17241	0.829444	2.06088
sp|P62908|RS3_MOUSE	gnl|gene7116|XL-9_2-gene7116|rna20780|	221	221	DEILPTTPISEQK	DEIVPTTPISEQK	RS3-mus221-xen221	6.94	11.3611	2.79494	3.50603
sp|O35250|EXOC7_MOUSE	gnl|gene4420|XL-9_2-gene4420|rna12888|	250	250	SSGVPYSPAIPNK	SSGITYSPAVQNK	EXOC7-mus250-xen250	4.015	5.60784	2.0054	2.48745
sp|P34152|FAK1_MOUSE	gnl|gene35117|XL-9_2-gene35117|rna74936|	910	913	LQPQEISPPPTAN	IQPQEISPPPTAN	FAK1-mus910-xen913	3.487	14.3667	1.80199	3.84465
sp|P35761|TTK_MOUSE	gnl|gene19328|XL-9_2-gene19328|rna56463|	820	844	QLVGLNSPNSILK	QLIGLNSPNSISR	TTK-mus820-xen844	6.104	6.01754	2.60975	2.58917
sp|Q8BUV3|GEPH_MOUSE	gnl|gene40142|XL-9_2-gene40142|rna82010|	270	412	STTPSESPRAQAT	STTPSESPRAQAT	GEPH-mus270-xen412	3.687	3.91358	1.88245	1.96849
sp|P63085|MK01_MOUSE	gnl|gene8598|XL-9_2-gene8598|rna25024|	183	188	DHTGFLTEYVATR	DHTGFLTEYVATR	MK01-mus183-xen188	6.358	8.9	2.66857	3.15381
sp|Q9D1F4|AKTS1_MOUSE	gnl|gene36828|XL-9_2-gene36828|rna77327|	184	208	TQQYAKSLPVSVP	YQQYARSLPVTVP	AKTS1-mus184-xen208	0.73	0.424806	-0.454032	-1.23512
sp|P63101|1433Z_MOUSE	gnl|gene15998|XL-9_2-gene15998|rna46763|	232	232	TLWTSDTQGDEAE	TLWTSDTQGDEAE	1433Z-mus232-xen232	2.264	21.8571	1.17887	4.45003
sp|P42208|SEPT2_MOUSE	gnl|gene1415|XL-9_2-gene1415|rna4136|	218	217	HLPDAESDEDEDF	HLPDAESDEDEDF	37500-mus218-xen217	1.342	0.835165	0.424385	-0.259867
sp|P42208|SEPT2_MOUSE	gnl|gene4895|XL-9_2-gene4895|rna14291|	218	217	HLPDAESDEDEDF	QLPDAESDEDEDF	37500-mus218-xen217	1.342	0.645833	0.424385	-0.630766
sp|Q9EST3|4ET_MOUSE	gnl|gene10718|XL-9_2-gene10718|rna31151|	114	141	DLDVVLSPQRRSF	DLDVVLSPQRRSF	4ET-mus114-xen141	2.111	1.09744	1.07793	0.134137
sp|Q9EST3|4ET_MOUSE	gnl|gene6548|XL-9_2-gene6548|rna19173|	563	557	LSQRAPSPPMSQV	LQQRSPSPQITQV	4ET-mus563-xen557	3.4	0.16763	1.76553	-2.57665
sp|Q9EST3|4ET_MOUSE	gnl|gene10718|XL-9_2-gene10718|rna31151|	563	582	LSQRAPSPPMSQV	LQQRSPSPQIPQV	4ET-mus563-xen582	3.4	0.184149	1.76553	-2.44105
sp|Q9EST3|4ET_MOUSE	gnl|gene10718|XL-9_2-gene10718|rna31151|	586	605	LHPRIPSPIGFPS	LRNHIPSPIGFAS	4ET-mus586-xen605	4.671	2.07317	2.22373	1.05184
sp|Q9EST3|4ET_MOUSE	gnl|gene10718|XL-9_2-gene10718|rna31151|	669	689	QQRMSKSPAPMHG	QPRVNKSPVANMR	4ET-mus669-xen689	6.41	1.02817	2.68032	0.0400774
sp|Q9EST3|4ET_MOUSE	gnl|gene6548|XL-9_2-gene6548|rna19173|	764	758	STLQRSSCSTPLS	ASISQRSCTPPLP	4ET-mus764-xen758	7.57	0.776667	2.92029	-0.364633
sp|Q9EST3|4ET_MOUSE	gnl|gene10718|XL-9_2-gene10718|rna31151|	975	973	MPTKVISVDELEY	MPAKVISVDELEY	4ET-mus975-xen973	1.776	5.94872	0.828632	2.57258
sp|Q9R078|AAKB1_MOUSE	gnl|gene3007|XL-9_2-gene3007|rna8709|	182	178	VSELSSSPPGPYH	ISDLSSSPPGPYQ	AAKB1-mus182-xen178	1.168	0.639144	0.22404	-0.645788
sp|Q9R078|AAKB1_MOUSE	gnl|gene20525|XL-9_2-gene20525|rna59923|	182	249	VSELSSSPPGPYH	LSDLSSSPPGPYQ	AAKB1-mus182-xen249	1.168	1.26449	0.22404	0.338559
sp|Q6P542|ABCF1_MOUSE	gnl|gene10093|XL-9_2-gene10093|rna29341|	225	274	KEAEQGSGEEKEE	GESNEGSGDEEGE	ABCF1-mus225-xen274	1.096	0.832244	0.132248	-0.264922
sp|Q9Z0F8|ADA17_MOUSE	gnl|gene18141|XL-9_2-gene18141|rna53003|	794	822	SSTAAKSFEDLTD	SGSPAKSFEDLTD	ADA17-mus794-xen822	2.775	2.14583	1.47249	1.10154
sp|Q9JKV1|ADRM1_MOUSE	gnl|gene11779|XL-9_2-gene11779|rna34211|	211	236	SSSSSRSQSAAVT	SSSSSRSQSAAVT	ADRM1-mus211-xen236	1.192	0.859195	0.253384	-0.218942
sp|Q9JKV1|ADRM1_MOUSE	gnl|gene11779|XL-9_2-gene11779|rna34211|	217	242	SQSAAVTPSSSTS	SQSAAVTPSSTTS	ADRM1-mus217-xen242	4.036	19.2	2.01293	4.26303
sp|Q9CYR6|AGM1_MOUSE	gnl|gene13707|XL-9_2-gene13707|rna39875|	64	75	GVMVTASHNPEED	GVMVTASHNPEED	AGM1-mus64-xen75	1.285	1.05263	0.361768	0.0740006
sp|Q9D1F4|AKTS1_MOUSE	gnl|gene12365|XL-9_2-gene12365|rna35949|	213	238	ENGPPSSPDLDRI	ETSKFPSPDLDRI	AKTS1-mus213-xen238	1.54	1.19753	0.62293	0.260063
sp|Q9D1F4|AKTS1_MOUSE	gnl|gene12365|XL-9_2-gene12365|rna35949|	247	269	PRPRLNTSDFQKL	PRPRLNTGDFQTK	AKTS1-mus247-xen269	1.014	0.676375	0.0200577	-0.564104
sp|Q3TSG4|ALKB5_MOUSE	gnl|gene49219|XL-9_2-gene49219|rna95108|	385	341	CPEAASSPTRKVK	TGEDEGSPVRKVK	ALKB5-mus385-xen341	1.809	0.428283	0.855192	-1.22336
sp|Q9EST5|AN32B_MOUSE	gnl|gene15784|XL-9_2-gene15784|rna46111|	265	257	EKRKRETDDEGED	EKRKRDTDDEGDE	AN32B-mus265-xen257	1.028	4.30108	0.0398403	2.1047
sp|Q6P1H6|ANKL2_MOUSE	gnl|gene4450|XL-9_2-gene4450|rna12983|	895	885	DRQSWPSPALKGK	SRQSWPSPALVSG	ANKL2-mus895-xen885	3.057	12	1.61212	3.58496
sp|P84091|AP2M1_MOUSE	gnl|gene14839|XL-9_2-gene14839|rna43291|	156	156	QITSQVTGQIGWR	QITSQVTGQIGWR	AP2M1-mus156-xen156	2.519	3.18116	1.33285	1.66955
sp|O35841|API5_MOUSE	gnl|gene14264|XL-9_2-gene14264|rna41561|	464	464	EDTSSGSPPKKSP	DETSSTSPPKKPV	API5-mus464-xen464	1.065	0.517615	0.0908534	-0.950048
sp|O35841|API5_MOUSE	gnl|gene12657|XL-9_2-gene12657|rna36767|	464	465	EDTSSGSPPKKSP	DETSSTSPPKKPI	API5-mus464-xen465	1.065	1.13805	0.0908534	0.18656
sp|P56212|ARP19_MOUSE	gnl|gene13125|XL-9_2-gene13125|rna38151|	104	113	LPQRKPSLVASKL	LPQRKPSLVASKL	ARP19-mus104-xen113	0.778	2.70068	-0.362158	1.43332
sp|G5E829|AT2B1_MOUSE	gnl|gene2746|XL-9_2-gene2746|rna7995|	1155	1178	EFRIEDSEPHIPL	DFRIEDSEPHIPL	AT2B1-mus1155-xen1178	1.738	0.726817	0.797428	-0.460336
sp|Q80XK6|ATG2B_MOUSE	gnl|gene17938|XL-9_2-gene17938|rna52444|	1571	1568	ATAPPTSPAKSYI	SALPPPSPAKHYM	ATG2B-mus1571-xen1568	2.783	1.1784	1.47664	0.236834
sp|Q80XK6|ATG2B_MOUSE	gnl|gene13426|XL-9_2-gene13426|rna39067|	1571	1570	ATAPPTSPAKSYI	SALPPLSPAKHYM	ATG2B-mus1571-xen1570	2.783	1.78495	1.47664	0.835881
sp|O70305|ATX2_MOUSE	gnl|gene42372|XL-9_2-gene42372|rna85248|	653	480	SGVPRLSPKTHRP	SGVQRLSPKTHRP	ATX2-mus653-xen480	4.228	1.83077	2.07998	0.87245
sp|O70305|ATX2_MOUSE	gnl|gene42906|XL-9_2-gene42906|rna86041|	653	481	SGVPRLSPKTHRP	SGVQRLSPKTHRP	ATX2-mus653-xen481	4.228	3.13475	2.07998	1.64835
sp|O70305|ATX2_MOUSE	gnl|gene42372|XL-9_2-gene42372|rna85248|	710	534	ASNRALTPSIEAK	ASNRAVTPSCEAK	ATX2-mus710-xen534	3.115	9.88889	1.63923	3.30581
tr|B1ART2|B1ART2_MOUSE	gnl|gene19270|XL-9_2-gene19270|rna56293|	1762	1761	DKSYPQTPPPSPS	DSEYPLTPPPSPT	B1ART2-mus1762-xen1761	2.797	0.594595	1.48388	-0.750022
tr|B1ART2|B1ART2_MOUSE	gnl|gene19270|XL-9_2-gene19270|rna56293|	3011	3008	SSSTIGSPSSRTN	SSSSVGSPISKTN	B1ART2-mus3011-xen3008	2.196	8.91111	1.13488	3.15561
sp|O88738|BIRC6_MOUSE	gnl|gene35046|XL-9_2-gene35046|rna74826|	476	426	PKLEGDSDDLLED	PKLEGDSDDLLDY	BIRC6-mus476-xen426	1.83	0.259259	0.871844	-1.94753
sp|Q9D8S9|BOLA1_MOUSE	gnl|gene7538|XL-9_2-gene7538|rna21971|	123	124	NPQLDISPPCLGG	NPAVSKSPACMGG	BOLA1-mus123-xen124	6.148	13.7576	2.62012	3.78215
sp|Q99MP8|BRAP_MOUSE	gnl|gene12491|XL-9_2-gene12491|rna36320|	116	115	VNTAPESPSKQLP	AMAVPDSPSKQLP	BRAP-mus116-xen115	1.323	1.19355	0.403813	0.255257
sp|Q7TPS5|C2CD5_MOUSE	gnl|gene49794|XL-9_2-gene49794|rna95931|	295	295	NQTYSFSPSKSYS	NQTYSFSPSKSFS	C2CD5-mus295-xen295	1.853	1.35632	0.889863	0.4397
sp|Q7TPS5|C2CD5_MOUSE	gnl|gene49794|XL-9_2-gene49794|rna95931|	314	314	DTDLSLTPKTGMG	DTDLSLTPKTGMG	C2CD5-mus314-xen314	1.735	0.286822	0.794936	-1.80177
sp|Q7TPS5|C2CD5_MOUSE	gnl|gene49794|XL-9_2-gene49794|rna95931|	339	339	ALLRQQTQSALEQ	TLLRQQTQSALEQ	C2CD5-mus339-xen339	0.273	7	-1.87303	2.80735
sp|Q7TPS5|C2CD5_MOUSE	gnl|gene49794|XL-9_2-gene49794|rna95931|	643	612	SEEMIGSPIPEPR	LEETVGSPIPEPR	C2CD5-mus643-xen612	1.273	7.11828	0.348232	2.83153
sp|Q7TPS5|C2CD5_MOUSE	gnl|gene49794|XL-9_2-gene49794|rna95931|	659	628	RLLRSQSESSDEV	RLLRSQSESSDET	C2CD5-mus659-xen628	1.247	0.456929	0.318461	-1.12996
sp|Q9D0N7|CAF1B_MOUSE	gnl|gene1224|XL-9_2-gene1224|rna3562|	426	425	SRSVEGTPSNRTQ	GSRQELTPSNKSM	CAF1B-mus426-xen425	3.705	40.5556	1.88947	5.34183
sp|P35564|CALX_MOUSE	gnl|gene42840|XL-9_2-gene42840|rna85902|	563	583	EDGVTGSQDEEDS	GDEGQESQEEEEA	CALX-mus563-xen583	0.75	1.36525	-0.415037	0.449163
sp|P35564|CALX_MOUSE	gnl|gene3002|XL-9_2-gene3002|rna8697|	582	602	DEILNRSPRNRKP	DEIINRSPRNRKL	CALX-mus582-xen602	1.073	0.958333	0.10165	-0.0614005
sp|P35564|CALX_MOUSE	gnl|gene42840|XL-9_2-gene42840|rna85902|	582	604	DEILNRSPRNRKP	DDIMNRSPRNRKP	CALX-mus582-xen604	1.073	2.19149	0.10165	1.13191
sp|Q05A80|CAPR2_MOUSE	gnl|gene20383|XL-9_2-gene20383|rna59541|	638	627	PASALASPNPPLS	LSDQLPSPKTPTH	CAPR2-mus638-xen627	12.309	2.2449	3.62164	1.16665
sp|Q05A80|CAPR2_MOUSE	gnl|gene20383|XL-9_2-gene20383|rna59541|	853	846	DSSQVSSPERDSE	ESSQMNSPEKEDS	CAPR2-mus853-xen846	2.157	0.105392	1.10903	-3.24616
sp|Q8R344|CCD12_MOUSE	gnl|gene17031|XL-9_2-gene17031|rna49768|	165	156	GQEACDSDxxxxx	NQEDEDSDxxxxx	CCD12-mus165-xen156	1.765	0.866044	0.819668	-0.207488
sp|Q9CR29|CCD43_MOUSE	gnl|gene46188|XL-9_2-gene46188|rna90839|	137	132	AQYADVTDEEDEA	AQYANVTDEEDED	CCD43-mus137-xen132	1.497	1.22963	0.582074	0.298224
sp|Q9CR29|CCD43_MOUSE	gnl|gene37863|XL-9_2-gene37863|rna78740|	137	132	AQYADVTDEEDEA	AQYANVTDEEDED	CCD43-mus137-xen132	1.497	1.0744	0.582074	0.103538
sp|Q52KE7|CCNL1_MOUSE	gnl|gene858|XL-9_2-gene858|rna2517|	341	315	STLGGFSPASKPS	LSMGGFSPASKPS	CCNL1-mus341-xen315	1.101	1.27843	0.138814	0.354375
sp|Q9JJ66|CDC20_MOUSE	gnl|gene18459|XL-9_2-gene18459|rna53902|	41	55	ATGPAPSPMRAAN	ANTSTLSPMKASN	CDC20-mus41-xen55	0.715	4.10526	-0.483985	2.03747
sp|Q6AW69|CGNL1_MOUSE	gnl|gene20395|XL-9_2-gene20395|rna59575|	284	264	PFRRQDSAGPILD	QFRRQNSAGAIEG	CGNL1-mus284-xen264	1.155	1.18315	0.207893	0.242633
sp|P63038|CH60_MOUSE	gnl|gene8200|XL-9_2-gene8200|rna23875|	70	70	IEQSWGSPKVTKD	IEQSWGSPKVTKD	CH60-mus70-xen70	1.958	1.27885	0.969381	0.354843
sp|Q9WUD1|CHIP_MOUSE	gnl|gene17422|XL-9_2-gene17422|rna50878|	20	25	GTGGGGSPDKSPS	SGGTEGSPEKSVS	CHIP-mus20-xen25	1.745	1.42063	0.803227	0.506536
sp|Q9WUD1|CHIP_MOUSE	gnl|gene521|XL-9_2-gene521|rna1480|	20	25	GTGGGGSPDKSPS	SGGTGGSPENVSA	CHIP-mus20-xen25	1.745	1.29412	0.803227	0.371969
sp|Q9CR86|CHSP1_MOUSE	gnl|gene3414|XL-9_2-gene3414|rna9939|	42	47	RGNVVPSPLPTRR	RGYLIPSPLPTRR	CHSP1-mus42-xen47	1.938	0.719858	0.954569	-0.474215
sp|P59242|CING_MOUSE	gnl|gene14298|XL-9_2-gene14298|rna41651|	90	108	SPGALSSDSELPE	PSRSISSESELPE	CING-mus90-xen108	0.323	1.85294	-1.63039	0.889817
sp|Q8C5L3|CNOT2_MOUSE	gnl|gene20475|XL-9_2-gene20475|rna59795|	165	145	SSSGLGSPNRSSP	SSSGLGSPNRSSP	CNOT2-mus165-xen145	0.939	1.08738	-0.0908029	0.120854
sp|Q8C5L3|CNOT2_MOUSE	gnl|gene20475|XL-9_2-gene20475|rna59795|	93	75	RGMSNNTPQLNRS	RGMSNNTPQLNRS	CNOT2-mus93-xen75	3.035	1.94792	1.6017	0.961932
sp|P18760|COF1_MOUSE	gnl|gene15554|XL-9_2-gene15554|rna45423|	25	25	KVRKSSTPEEVKK	KVRHQLSPEEAKK	COF1-mus25-xen25	11.166	8.11905	3.48104	3.02131
sp|Q8CIE6|COPA_MOUSE	gnl|gene12732|XL-9_2-gene12732|rna36999|	173	173	LRKKNLSPGAVES	LRKKNLSPGAVEA	COPA-mus173-xen173	4.138	8.03509	2.04893	3.00631
sp|Q91W50|CSDE1_MOUSE	gnl|gene16932|XL-9_2-gene16932|rna49475|	116	157	HNLESKSPAAPGQ	HNLETKSPAAPGQ	CSDE1-mus116-xen157	1.504	5.01333	0.588805	2.32577
sp|Q8BIQ5|CSTF2_MOUSE	gnl|gene5997|XL-9_2-gene5997|rna17546|	154	154	KLCVQNSPQEARN	KLCVQNSPQEARN	CSTF2-mus154-xen154	1.904	6.68421	0.929033	2.74076
sp|Q99LI7|CSTF3_MOUSE	gnl|gene5143|XL-9_2-gene5143|rna15044|	691	692	KRPNEDSDEDEEK	KRPNEDSDDEEEK	CSTF3-mus691-xen692	1.042	2.0791	0.0593553	1.05596
sp|P26231|CTNA1_MOUSE	gnl|gene7711|XL-9_2-gene7711|rna22519|	641	638	PEELDDSDFETED	PEELDDSDFETED	CTNA1-mus641-xen638	1.012	0.563536	0.0172093	-0.827421
sp|P26231|CTNA1_MOUSE	gnl|gene7711|XL-9_2-gene7711|rna22519|	652	649	EDFDVRSRTSVQT	EDFDVRSRTSVQT	CTNA1-mus652-xen649	1.62	3.76068	0.695994	1.91099
sp|Q62018|CTR9_MOUSE	gnl|gene18099|XL-9_2-gene18099|rna52898|	925	927	EFVNDDTDDDLPV	EFVNDDSDEELAP	CTR9-mus925-xen927	2.3	0.982609	1.20163	-0.0253111
sp|Q8R1Q8|DC1L1_MOUSE	gnl|gene9164|XL-9_2-gene9164|rna26638|	207	197	GEDFPASPQRRTT	GDELPTSPQRRNT	DC1L1-mus207-xen197	2.366	3.00855	1.24245	1.58907
sp|Q8R1Q8|DC1L1_MOUSE	gnl|gene14424|XL-9_2-gene14424|rna41986|	207	197	GEDFPASPQRRTT	GEEFPASPQRRNT	DC1L1-mus207-xen197	2.366	0.548387	1.24245	-0.866733
sp|Q8R1Q8|DC1L1_MOUSE	gnl|gene9164|XL-9_2-gene9164|rna26638|	398	386	GRPVDASPRVPGG	AGRQDASPRVPGG	DC1L1-mus398-xen386	3.728	0.677778	1.8984	-0.561116
sp|Q8R1Q8|DC1L1_MOUSE	gnl|gene9164|XL-9_2-gene9164|rna26638|	421	409	SNVASVSPIPAGS	TNVASVSPVPAGT	DC1L1-mus421-xen409	3.961	5.77193	1.98586	2.52905
sp|Q8R1Q8|DC1L1_MOUSE	gnl|gene9164|XL-9_2-gene9164|rna26638|	467	452	GPGVGGSPGGGAA	SPGAGGTGIPAGN	DC1L1-mus467-xen452	3.088	5.58333	1.62667	2.48113
sp|Q8R1Q8|DC1L1_MOUSE	gnl|gene9164|XL-9_2-gene9164|rna26638|	482	467	SPSLPPSAKKSGQ	GNSLPASAKKTGQ	DC1L1-mus482-xen467	2.325	3.65789	1.21723	1.87101
sp|Q8R1Q8|DC1L1_MOUSE	gnl|gene9164|XL-9_2-gene9164|rna26638|	510	495	RKPASVSPTTPTS	RKPDIVSPTTPTS	DC1L1-mus510-xen495	1.218	0.642857	0.284514	-0.63743
sp|Q8R1Q8|DC1L1_MOUSE	gnl|gene14424|XL-9_2-gene14424|rna41986|	510	495	RKPASVSPTTPTS	RKPDIVSPTSPTS	DC1L1-mus510-xen495	1.218	0.375	0.284514	-1.41504
sp|Q8R1Q8|DC1L1_MOUSE	gnl|gene9164|XL-9_2-gene9164|rna26638|	513	498	ASVSPTTPTSPTE	DIVSPTTPTSPTE	DC1L1-mus513-xen498	1.476	0.666667	0.561693	-0.584962
sp|Q8R1Q8|DC1L1_MOUSE	gnl|gene14424|XL-9_2-gene14424|rna41986|	513	498	ASVSPTTPTSPTE	DIVSPTSPTSPTE	DC1L1-mus513-xen498	1.476	0.507937	0.561693	-0.97728
sp|Q8R1Q8|DC1L1_MOUSE	gnl|gene9164|XL-9_2-gene9164|rna26638|	516	501	SPTTPTSPTEGEA	SPTTPTSPTENDT	DC1L1-mus516-xen501	1.547	2.97101	0.629473	1.57096
sp|Q8R1Q8|DC1L1_MOUSE	gnl|gene14424|XL-9_2-gene14424|rna41986|	516	501	SPTTPTSPTEGEA	SPTSPTSPTENDT	DC1L1-mus516-xen501	1.547	0.470085	0.629473	-1.08901
sp|Q6PDL0|DC1L2_MOUSE	gnl|gene2773|XL-9_2-gene2773|rna8074|	194	187	EEGCQGSPQRRGP	EEALSGSPQRRGP	DC1L2-mus194-xen187	1.848	1.2483	0.885965	0.319964
sp|Q6PDL0|DC1L2_MOUSE	gnl|gene2773|XL-9_2-gene2773|rna8074|	383	376	PTRTSESPARGPS	PTRASESPARAPT	DC1L2-mus383-xen376	2.809	64.5	1.49006	6.01123
sp|Q6PDL0|DC1L2_MOUSE	gnl|gene2773|XL-9_2-gene2773|rna8074|	407	400	ASVPSASPGTSVK	NAVPSSSPMAAAK	DC1L2-mus407-xen400	2.514	11.375	1.32998	3.50779
sp|Q6PDL0|DC1L2_MOUSE	gnl|gene2773|XL-9_2-gene2773|rna8074|	446	439	KTGSPGSPSAGGV	KTGSPGSPGGGGA	DC1L2-mus446-xen439	2.354	8.31111	1.23511	3.05504
sp|Q8N7N5|DCAF8_MOUSE	gnl|gene12318|XL-9_2-gene12318|rna35803|	23	22	NGSLSSSPEEMSG	NGGFSSSPEDMSG	DCAF8-mus23-xen22	1.624	2.35135	0.699552	1.23349
sp|Q8N7N5|DCAF8_MOUSE	gnl|gene12318|XL-9_2-gene12318|rna35803|	28	27	SSPEEMSGAEEGR	SSPEDMSGAEEGK	DCAF8-mus28-xen27	1.029	1.62557	0.041243	0.700946
sp|Q8N7N5|DCAF8_MOUSE	gnl|gene12318|XL-9_2-gene12318|rna35803|	72	69	RGTDTESSGEEKD	RDSCSETSGEDKD	DCAF8-mus72-xen69	0.46	8	-1.12029	3
sp|Q61655|DD19A_MOUSE	gnl|gene11519|XL-9_2-gene11519|rna33456|	467	472	KIERLDTDDLDEI	KITKLNSMDMDEM	DD19A-mus467-xen472	2.342	1.89831	1.22774	0.924712
sp|A2ADY9|DDI2_MOUSE	gnl|gene46812|XL-9_2-gene46812|rna91739|	194	188	ERIRLFSADPFDL	ERIRLYSADPFDL	DDI2-mus194-xen188	7.894	17.0556	2.98076	4.09217
sp|P54823|DDX6_MOUSE	gnl|gene14340|XL-9_2-gene14340|rna41768|	55	54	STINNGTPQQAQS	STINSGSQQQAQS	DDX6-mus55-xen54	5.463	25.0833	2.44969	4.64866
sp|A6H8H2|DEN4C_MOUSE	gnl|gene18613|XL-9_2-gene18613|rna54332|	1221	1278	SEDKLFSPVISRN	SEEKHISPVVARN	DEN4C-mus1221-xen1278	2.539	4.59375	1.34426	2.19967
sp|P13864|DNMT1_MOUSE	gnl|gene34548|XL-9_2-gene34548|rna74145|	717	586	DVSEMPSPKKLHQ	VLPEMPSPKKILQ	DNMT1-mus717-xen586	1.802	3.10569	0.849599	1.63491
sp|P13864|DNMT1_MOUSE	gnl|gene4753|XL-9_2-gene4753|rna13885|	717	588	DVSEMPSPKKLHQ	VVPEMPSPKKILQ	DNMT1-mus717-xen588	1.802	3.4065	0.849599	1.76829
sp|P13864|DNMT1_MOUSE	gnl|gene34548|XL-9_2-gene34548|rna74145|	882	750	EYARFESPPKTQP	EYARFETPPKPQS	DNMT1-mus882-xen750	2.059	24.2381	1.04194	4.5992
sp|Q3UHQ6|DOP1B_MOUSE	gnl|gene9600|XL-9_2-gene9600|rna27927|	597	596	IGLSASSPELSEH	IGLSASSPELSKH	DOP1B-mus597-xen596	2.562	6.86111	1.35727	2.77844
sp|Q8K3H0|DP13A_MOUSE	gnl|gene6725|XL-9_2-gene6725|rna19690|	399	399	SALEAVTPSPSFQ	SALEAVTPSPSFQ	DP13A-mus399-xen399	1.927	6.8125	0.946357	2.76818
sp|O70318|E41L2_MOUSE	gnl|gene2281|XL-9_2-gene2281|rna6636|	543	538	SKRVSRSLDGAPI	SKRVSRSLDGAPI	E41L2-mus543-xen538	1.941	43.4167	0.9568	5.44018
sp|O70318|E41L2_MOUSE	gnl|gene2281|XL-9_2-gene2281|rna6636|	555	551	IGVVDQSPPGEGS	GGTTDQSLLKDYT	E41L2-mus555-xen551	3.06	16.3077	1.61353	4.02748
tr|E9PUR0|E9PUR0_MOUSE	gnl|gene14514|XL-9_2-gene14514|rna42265|	1592	1499	GGAGGNSDSDNID	GGTNRNSDSENLD	E9PUR0-mus1592-xen1499	0.224	3.11364	-2.15843	1.6386
tr|E9PX68|E9PX68_MOUSE	gnl|gene37780|XL-9_2-gene37780|rna78615|	258	434	KMLGEDSDEEEEA	KMLGDDSDDEESS	E9PX68-mus258-xen434	1.11	1.1963	0.15056	0.258575
tr|E9PX68|E9PX68_MOUSE	gnl|gene19746|XL-9_2-gene19746|rna57692|	258	479	KMLGEDSDEEEEA	RMLGDDSDDEESS	E9PX68-mus258-xen479	1.11	1.3528	0.15056	0.435946
tr|E9PYF4|E9PYF4_MOUSE	gnl|gene17545|XL-9_2-gene17545|rna51247|	927	1050	SLPRSYTMDDGWK	SLPRSFTMDDSSK	E9PYF4-mus927-xen1050	1.378	3.10606	0.462576	1.63509
sp|Q07139|ECT2_MOUSE	gnl|gene8271|XL-9_2-gene8271|rna24082|	376	375	SLSTPNSNRKRRR	TLNTPSSNRKKRR	ECT2-mus376-xen375	2.766	21.5714	1.4678	4.43105
sp|O70251|EF1B_MOUSE	gnl|gene184|XL-9_2-gene184|rna515|	106	108	DIDLFGSDDEEES	DIDLFGSDDEEES	EF1B-mus106-xen108	1.422	0.824561	0.507921	-0.278301
sp|Q9QXY6|EHD3_MOUSE	gnl|gene16364|XL-9_2-gene16364|rna47793|	456	455	EIFYTLSPVDGKI	EIFYTLSPVNGKV	EHD3-mus456-xen455	7.633	31.6111	2.93225	4.98236
sp|Q9EQP2|EHD4_MOUSE	gnl|gene13864|XL-9_2-gene13864|rna40364|	459	455	ELFYTLSPINGKI	ELFYTLSPINGKI	EHD4-mus459-xen455	2.494	32.7778	1.31846	5.03465
sp|Q8R1B4|EIF3C_MOUSE	gnl|gene7901|XL-9_2-gene7901|rna23051|	166	166	KQNPEQSADEDAE	KQNPEESADEDQE	EIF3C-mus166-xen166	3.213	1.81373	1.68392	0.858956
sp|Q8R1B4|EIF3C_MOUSE	gnl|gene7901|XL-9_2-gene7901|rna23051|	39	39	KQPLLLSEDEEDT	KQPIILSDDEEDT	EIF3C-mus39-xen39	1.27	1.09568	0.344828	0.131825
sp|Q9DBZ5|EIF3K_MOUSE	gnl|gene16659|XL-9_2-gene16659|rna48671|	217	260	SSIMASSQxxxxx	SGIMASSQxxxxx	EIF3K-mus217-xen260	2.104	2.27222	1.07313	1.1841
sp|P60840|ENSA_MOUSE	gnl|gene36918|XL-9_2-gene36918|rna77459|	67	67	GQKYFDSGDYNMA	GQKYFDSGDYNMA	ENSA-mus67-xen67	1.155	0.615942	0.207893	-0.699134
sp|Q08509|EPS8_MOUSE	gnl|gene633|XL-9_2-gene633|rna1846|	814	782	SDSGVESFDEGSS	SDSGVESFDEGNS	EPS8-mus814-xen782	3.102	3.38095	1.6332	1.75743
sp|P60330|ESPL1_MOUSE	gnl|gene15654|XL-9_2-gene15654|rna45711|	1394	1411	VIFSDDSDLEDLV	KVDFNDSDLEVAD	ESPL1-mus1394-xen1411	1.782	0.927649	0.833497	-0.10835
sp|P60330|ESPL1_MOUSE	gnl|gene39542|XL-9_2-gene39542|rna81162|	1394	1411	VIFSDDSDLEDLV	KVDFSDSDLEVPD	ESPL1-mus1394-xen1411	1.782	0.793187	0.833497	-0.334266
sp|O35382|EXOC4_MOUSE	gnl|gene14003|XL-9_2-gene14003|rna40794|	226	219	SHGKDPSPGPLID	SLLVKDSPVPLVD	EXOC4-mus226-xen219	5.969	2.72222	2.57749	1.44478
tr|F2Z3U3|F2Z3U3_MOUSE	gnl|gene14010|XL-9_2-gene14010|rna40812|	192	193	QHRRTASAGTVSD	HHRRTASAGTVSD	F2Z3U3-mus192-xen193	1.521	1.05387	0.60502	0.0756997
tr|F2Z3U3|F2Z3U3_MOUSE	gnl|gene19712|XL-9_2-gene19712|rna57610|	899	922	ASGTPQSPPAVKA	SNSVPQSPPAVKA	F2Z3U3-mus899-xen922	1.872	1.51351	0.90458	0.597902
tr|F2Z3U3|F2Z3U3_MOUSE	gnl|gene14010|XL-9_2-gene14010|rna40812|	899	925	ASGTPQSPPAVKA	SNSAPQSPPAVKA	F2Z3U3-mus899-xen925	1.872	0.979167	0.90458	-0.0303736
tr|F8VQ05|F8VQ05_MOUSE	gnl|gene50601|XL-9_2-gene50601|rna97185|	2273	2378	YGVDVGSPEISFA	YGGDLGSPEISFT	F8VQ05-mus2273-xen2378	5.462	3.11111	2.44943	1.63743
sp|Q5SWY7|FA83G_MOUSE	gnl|gene1588|XL-9_2-gene1588|rna4643|	356	339	ALVKAKSVDEIAK	ALVRTKSASDTGA	FA83G-mus356-xen339	1.31	3.12195	0.389567	1.64245
sp|Q3ULA2|FBW1A_MOUSE	gnl|gene17483|XL-9_2-gene17483|rna51055|	127	122	PKQRKLSASYEKE	PKQRKLSANYEKE	FBW1A-mus127-xen122	1.401	1.57071	0.486457	0.651414
sp|Q8CIB5|FERM2_MOUSE	gnl|gene10779|XL-9_2-gene10779|rna31325|	666	724	AKDQNESLDEEMF	AKDQNESLDEEMF	FERM2-mus666-xen724	3.878	18.3667	1.95531	4.19902
sp|Q9JJ28|FLII_MOUSE	gnl|gene9236|XL-9_2-gene9236|rna26822|	418	419	AAAAVGSGSKDPL	AAAGAGSATKDPS	FLII-mus418-xen419	5.539	6.66667	2.46963	2.73697
sp|Q6ZQ03|FNBP4_MOUSE	gnl|gene48074|XL-9_2-gene48074|rna93495|	472	415	MFVRATSPESTSR	VFVPTASPESTSR	FNBP4-mus472-xen415	0.792	1.34767	-0.336428	0.430468
sp|Q61584|FXR1_MOUSE	gnl|gene17701|XL-9_2-gene17701|rna51729|	438	438	SELSNPSETESER	SELSNPSETESER	FXR1-mus438-xen438	1.263	0.691877	0.336855	-0.531413
sp|Q9Z1T6|FYV1_MOUSE	gnl|gene14678|XL-9_2-gene14678|rna42776|	329	355	SYETSVSPQANRN	PYESSVSPQSSRT	FYV1-mus329-xen355	1.095	0.765625	0.130931	-0.38529
sp|P97855|G3BP1_MOUSE	gnl|gene8708|XL-9_2-gene8708|rna25350|	149	182	TEPQEESEEEVEE	TEPPEESDEEVEE	G3BP1-mus149-xen182	2.125	1.7027	1.08746	0.767827
sp|P97855|G3BP1_MOUSE	gnl|gene8817|XL-9_2-gene8817|rna25680|	149	182	TEPQEESEEEVEE	TEPPEESDEEAEE	G3BP1-mus149-xen182	2.125	1.29412	1.08746	0.371969
sp|P97855|G3BP1_MOUSE	gnl|gene8708|XL-9_2-gene8708|rna25350|	231	269	DVQKSTSPAPADV	TIEKSPSPLPADP	G3BP1-mus231-xen269	2.119	2.0566	1.08338	1.04026
sp|P97855|G3BP1_MOUSE	gnl|gene8817|XL-9_2-gene8817|rna25680|	231	269	DVQKSTSPAPADV	NIEKSPSPPPADP	G3BP1-mus231-xen269	2.119	1.97475	1.08338	0.981668
sp|P97379|G3BP2_MOUSE	gnl|gene4173|XL-9_2-gene4173|rna12151|	225	242	EELEEKSATPPPA	EELEEKSPTPPPA	G3BP2-mus225-xen242	3.202	10.4889	1.67897	3.39079
sp|P97379|G3BP2_MOUSE	gnl|gene4173|XL-9_2-gene4173|rna12151|	227	244	LEEKSATPPPAEP	LEEKSPTPPPAEP	G3BP2-mus227-xen244	2.813	0.741047	1.49211	-0.432363
tr|G3X8X0|G3X8X0_MOUSE	gnl|gene100|XL-9_2-gene100|rna281|	103	100	YKLLEDSESGEEA	YTLLEDSEEEEKP	G3X8X0-mus103-xen100	1.95	0.849275	0.963474	-0.235696
sp|P47856|GFPT1_MOUSE	gnl|gene44059|XL-9_2-gene44059|rna87749|	259	260	GLSRVDSTTCLFP	SLPRHDSTTCLFP	GFPT1-mus259-xen260	0.912	1.56777	-0.132894	0.64871
sp|Q68FF6|GIT1_MOUSE	gnl|gene5604|XL-9_2-gene5604|rna16408|	379	379	TDNLELSARSQSE	TDNFDYSFRNAND	GIT1-mus379-xen379	2.966	12.1667	1.56852	3.60486
sp|Q68FF6|GIT1_MOUSE	gnl|gene5604|XL-9_2-gene5604|rna16408|	397	397	DYDSVASDEDTDQ	DYDSVASDEDTDQ	GIT1-mus397-xen397	0.49	0.724206	-1.02915	-0.465527
sp|Q8K0C9|GMDS_MOUSE	gnl|gene39573|XL-9_2-gene39573|rna81205|	59	56	IVRRSSSFNTGRI	IVRRSSSFNTGRI	GMDS-mus59-xen56	1.028	1.00306	0.0398403	0.00440518
sp|P36916|GNL1_MOUSE	gnl|gene11305|XL-9_2-gene11305|rna32873|	50	50	REEQTDTSDGESV	WEENTDTSDSESL	GNL1-mus50-xen50	1.268	1.19182	0.342555	0.253171
sp|Q8R080|GTSE1_MOUSE	gnl|gene17171|XL-9_2-gene17171|rna50143|	107	108	EVAQAATPQNPVN	DPKEDRSAQSDTN	GTSE1-mus107-xen108	2.732	9.48485	1.44996	3.24562
sp|Q8R080|GTSE1_MOUSE	gnl|gene17171|XL-9_2-gene17171|rna50143|	551	573	VPARRLSSEPRRR	MQALQTSAKSIKK	GTSE1-mus551-xen573	1.61	34.1111	0.687061	5.09217
sp|Q8R080|GTSE1_MOUSE	gnl|gene42609|XL-9_2-gene42609|rna85597|	73	96	GSPCTLSPLTGEK	NEDVPWSPLSGDK	GTSE1-mus73-xen96	2.75	17.1667	1.45943	4.10154
sp|Q8C0P0|GWL_MOUSE	gnl|gene26122|XL-9_2-gene26122|rna65622|	442	467	FHLVDSSPCQEIM	HDLVEKSPEQELL	GWL-mus442-xen467	2.774	5.15278	1.47197	2.36535
sp|Q8K2C9|HACD3_MOUSE	gnl|gene17160|XL-9_2-gene17160|rna50108|	114	111	DRWLDESDAEMEL	DRWLDESDAEMEL	HACD3-mus114-xen111	1.233	0.716146	0.302173	-0.481675
sp|P51859|HDGF_MOUSE	gnl|gene20325|XL-9_2-gene20325|rna59358|	165	190	GDVLEDSPKRPKE	EDTAESSPKKAKV	HDGF-mus165-xen190	1.224	5.18667	0.291604	2.37481
sp|Q8R1F6|HID1_MOUSE	gnl|gene17535|XL-9_2-gene17535|rna51201|	593	594	PLSRTGSQEGTSM	PISRTNSQDGNSM	HID1-mus593-xen594	1.16	3.66	0.214125	1.87184
sp|Q8R1F6|HID1_MOUSE	gnl|gene3210|XL-9_2-gene3210|rna9297|	593	594	PLSRTGSQEGTSM	PISRTNSQDGASM	HID1-mus593-xen594	1.16	2.61905	0.214125	1.38904
sp|Q8BLH7|HIRP3_MOUSE	gnl|gene10580|XL-9_2-gene10580|rna30741|	564	661	PSGEGTSPGETYR	SPSRDVSPPAEYR	HIRP3-mus564-xen661	1.58	0.989011	0.659925	-0.0159415
sp|Q8BLH7|HIRP3_MOUSE	gnl|gene41077|XL-9_2-gene41077|rna83354|	575	654	YRRTLDSEEEQPR	KSVASDSEDEEAP	HIRP3-mus575-xen654	0.951	0.890511	-0.0724828	-0.167295
sp|Q8BUK6|HOOK3_MOUSE	gnl|gene40411|XL-9_2-gene40411|rna82402|	238	259	SIEDPNSPAGRRH	SLEDPNSPAGRRH	HOOK3-mus238-xen259	4.675	4.84848	2.22497	2.27753
sp|P07901|HS90A_MOUSE	gnl|gene18696|XL-9_2-gene18696|rna54574|	231	237	ERDKEVSDDEAEE	ERDKEISDDEAEE	HS90A-mus231-xen237	1.07	1.58009	0.0976108	0.660004
sp|P07901|HS90A_MOUSE	gnl|gene18696|XL-9_2-gene18696|rna54574|	263	265	EIEDVGSDEEEEE	EIEDVGSDDEEDK	HS90A-mus263-xen265	1.006	1.24211	0.00863031	0.312787
sp|P11499|HS90B_MOUSE	gnl|gene36329|XL-9_2-gene36329|rna76607|	255	256	KIEDVGSDEEDDS	KIEDVGSDDEEEG	HS90B-mus255-xen256	0.961	1.325	-0.0573917	0.405992
sp|P11499|HS90B_MOUSE	gnl|gene3904|XL-9_2-gene3904|rna11401|	255	260	KIEDVGSDEEDDS	KIEDVGSDEEEEG	HS90B-mus255-xen260	0.961	1.08247	-0.0573917	0.114333
sp|P38532|HSF1_MOUSE	gnl|gene45088|XL-9_2-gene45088|rna89304|	303	295	VKQEPPSPPHSPR	IKEEPLTPSHSPE	HSF1-mus303-xen295	1.149	1.14706	0.200379	0.197939
sp|P38532|HSF1_MOUSE	gnl|gene45088|XL-9_2-gene45088|rna89304|	307	299	PPSPPHSPRVLEA	PLTPSHSPEQSPA	HSF1-mus307-xen299	1.149	1.11556	0.200379	0.157762
sp|Q9CPN8|IF2B3_MOUSE	gnl|gene18830|XL-9_2-gene18830|rna54961|	184	193	GSSRQASPGSVSK	GPARQGSPGAAAR	IF2B3-mus184-xen193	1.868	1.52321	0.901494	0.607112
sp|Q9CPN8|IF2B3_MOUSE	gnl|gene18830|XL-9_2-gene18830|rna54961|	528	541	VVPRDQTPDENDQ	VVPRDQTPDENDE	IF2B3-mus528-xen541	1.259	2.03448	0.332278	1.02466
sp|Q8BGD9|IF4B_MOUSE	gnl|gene8804|XL-9_2-gene8804|rna25637|	422	444	ERSRTGSESSQTG	ERSRTGSESSQTA	IF4B-mus422-xen444	3.272	1.73333	1.71017	0.793549
sp|Q8BGD9|IF4B_MOUSE	gnl|gene38978|XL-9_2-gene38978|rna80409|	597	603	SKYAALSVDGEDE	SKYSALSMDGEEE	IF4B-mus597-xen603	2.01	0.963303	1.0072	-0.0539388
sp|Q6NZJ6|IF4G1_MOUSE	gnl|gene19578|XL-9_2-gene19578|rna57206|	1211	1218	GLRKAASLTEDRG	AVRKVASMTEQRD	IF4G1-mus1211-xen1218	1.024	21.4583	0.0342157	4.42347
sp|Q3TT38|ILRUN_MOUSE	gnl|gene11253|XL-9_2-gene11253|rna32730|	215	215	NFNPFASPQKNRQ	NYNPFASPEKSLS	ILRUN-mus215-xen215	1.922	6.66667	0.942608	2.73697
sp|P52293|IMA1_MOUSE	gnl|gene1991|XL-9_2-gene1991|rna5795|	62	58	FPDDATSPLQENR	FPDEPTSPLQEKN	IMA1-mus62-xen58	4.716	1.57746	2.23756	0.657608
sp|P52293|IMA1_MOUSE	gnl|gene10441|XL-9_2-gene10441|rna30343|	62	59	FPDDATSPLQENR	PEELILSPEKNAM	IMA1-mus62-xen59	4.716	130.333	2.23756	7.02606
sp|P52293|IMA1_MOUSE	gnl|gene5581|XL-9_2-gene5581|rna16335|	62	59	FPDDATSPLQENR	PEELILSPEKNAM	IMA1-mus62-xen59	4.716	43.5556	2.23756	5.44478
sp|O35344|IMA4_MOUSE	gnl|gene14416|XL-9_2-gene14416|rna41968|	60	60	EESLEDSDVDADF	EESLEDSDVDGDF	IMA4-mus60-xen60	1.292	0.475556	0.369606	-1.07231
sp|Q9D168|INT12_MOUSE	gnl|gene4232|XL-9_2-gene4232|rna12318|	377	389	GLSRSVSCDNVSK	GLSRSMSSDNVSK	INT12-mus377-xen389	1.898	7.10606	0.92448	2.82905
sp|Q922B9|ITPI2_MOUSE	gnl|gene2226|XL-9_2-gene2226|rna6468|	738	715	PLRRSQSLPTTLL	PLRRSQSLPSALL	ITPI2-mus738-xen715	3.964	1	1.98696	0
sp|Q922B9|ITPI2_MOUSE	gnl|gene38498|XL-9_2-gene38498|rna79672|	90	78	RTPLGASLDEQSS	RTPLGASLDEQNN	ITPI2-mus90-xen78	0.745	1	-0.424688	0
sp|P11881|ITPR1_MOUSE	gnl|gene1945|XL-9_2-gene1945|rna5662|	1755	1705	PSGRRESLTSFGN	PAGRRESLTSFGN	ITPR1-mus1755-xen1705	0.513	0.905852	-0.962969	-0.142652
sp|P11881|ITPR1_MOUSE	gnl|gene15043|XL-9_2-gene15043|rna43898|	1755	1732	PSGRRESLTSFGN	PAGRRESLTSFGN	ITPR1-mus1755-xen1732	0.513	0.704955	-0.962969	-0.504397
sp|Q9DBC7|KAP0_MOUSE	gnl|gene19348|XL-9_2-gene19348|rna56515|	83	82	SREDEISPPPPNP	SREDEISPPPHMN	KAP0-mus83-xen82	2.903	0.841584	1.53754	-0.248821
sp|P31324|KAP3_MOUSE	gnl|gene16383|XL-9_2-gene16383|rna47851|	112	98	RFTRRASVCAEAY	RFSRRASVCAEAY	KAP3-mus112-xen98	1.48	0.866667	0.565597	-0.206451
sp|P31324|KAP3_MOUSE	gnl|gene16383|XL-9_2-gene16383|rna47851|	83	73	AEEPMRSDSENGE	EEPSMQTDSENGE	KAP3-mus83-xen73	4.189	1.69697	2.06661	0.762961
sp|Q9JMK2|KC1E_MOUSE	gnl|gene2337|XL-9_2-gene2337|rna6801|	389	389	GAPANVSSSDLTG	GAPANVSSSDLTG	KC1E-mus389-xen389	1.598	2.08602	0.676267	1.06075
sp|Q6P9P6|KIF11_MOUSE	gnl|gene17247|XL-9_2-gene17247|rna50346|	925	937	DIPTGMTPERKKY	DVPTGTTPQRRDY	KIF11-mus925-xen937	3.276	1.65517	1.71194	0.726982
sp|P28867|KPCD_MOUSE	gnl|gene34675|XL-9_2-gene34675|rna74325|	662	671	EAFHGFSFVNPKF	SAFHGFSFINPKM	KPCD-mus662-xen671	1.521	26.8667	0.60502	4.74775
sp|Q8BSK8|KS6B1_MOUSE	gnl|gene554|XL-9_2-gene554|rna1597|	452	448	VSPVKFSPGDFWG	ISPVKFSPGDIWG	KS6B1-mus452-xen448	2.618	3.47778	1.38847	1.79817
sp|Q5SUF2|LC7L3_MOUSE	gnl|gene9334|XL-9_2-gene9334|rna27136|	425	425	TSEDIKSEGDTQS	ANEGNKSEGDTQS	LC7L3-mus425-xen425	0.889	17.4762	-0.169745	4.12732
sp|Q5SUF2|LC7L3_MOUSE	gnl|gene7114|XL-9_2-gene7114|rna20775|	425	425	TSEDIKSEGDTQS	ANEGNKSEGDTQS	LC7L3-mus425-xen425	0.889	0.990196	-0.169745	-0.0142139
sp|Q5XJE5|LEO1_MOUSE	gnl|gene6431|XL-9_2-gene6431|rna18828|	631	739	KAKKLNSDEEGES	KAKKLNSDEEDQD	LEO1-mus631-xen739	1.314	1.26587	0.393965	0.340133
sp|Q8K2F8|LS14A_MOUSE	gnl|gene6880|XL-9_2-gene6880|rna20119|	192	191	LDPLRKSPTMEQA	LDSLRKSPTIEQA	LS14A-mus192-xen191	2.749	1.6875	1.45891	0.754888
sp|Q8K2F8|LS14A_MOUSE	gnl|gene6880|XL-9_2-gene6880|rna20119|	216	216	APVGRRSPVPARP	AAVGRRSPVLSRP	LS14A-mus216-xen216	1.827	1.23188	0.869477	0.300866
sp|Q8K2F8|LS14A_MOUSE	gnl|gene18213|XL-9_2-gene18213|rna53210|	216	218	APVGRRSPVPARP	ATVGRRSPVLSRP	LS14A-mus216-xen218	1.827	2.98582	0.869477	1.57813
sp|Q8CGC4|LS14B_MOUSE	gnl|gene10767|XL-9_2-gene10767|rna31292|	154	191	STPVGKSPMVEQA	SIPVRKSPMVEQA	LS14B-mus154-xen191	5.077	4.91398	2.34398	2.29689
sp|Q80WJ7|LYRIC_MOUSE	gnl|gene8345|XL-9_2-gene8345|rna24295|	308	272	NSVPPASAGKRKT	KWAPSTSAGKKKA	LYRIC-mus308-xen272	4.867	39	2.28303	5.2854
sp|P26645|MARCS_MOUSE	gnl|gene4201|XL-9_2-gene4201|rna12223|	143	123	PSPSSETPKKKKK	PSTSNETPKKKKK	MARCS-mus143-xen123	5.331	0.980843	2.41441	-0.027906
sp|Q8BJ34|MARF1_MOUSE	gnl|gene16001|XL-9_2-gene16001|rna46776|	622	612	KDTSEQSPSVKAM	IKDQNDSPFKTQV	MARF1-mus622-xen612	13.14	23	3.71589	4.52356
sp|Q9WV66|MARH7_MOUSE	gnl|gene41227|XL-9_2-gene41227|rna83583|	302	382	FFSRRSSQDSLNT	FFSRRSSQDSLNG	MARH7-mus302-xen382	1.059	0.905852	0.0827026	-0.142652
sp|Q7TT18|MCAF1_MOUSE	gnl|gene4107|XL-9_2-gene4107|rna11962|	593	514	RRKRSKSEDMDSV	RRKRSKSEDLDNE	MCAF1-mus593-xen514	1.55	1.41463	0.632268	0.500429
sp|Q0VBD2|MCM10_MOUSE	gnl|gene13480|XL-9_2-gene13480|rna39218|	619	596	RQAAAQSPRTGAE	ACSVFQSPKQGAE	MCM10-mus619-xen596	2.884	5.70513	1.52807	2.51226
sp|P97310|MCM2_MOUSE	gnl|gene6554|XL-9_2-gene6554|rna19190|	139	123	RGLLYDSSEEDEE	RGLLYDSDEEEED	MCM2-mus139-xen123	1.259	1.01404	0.332278	0.0201076
sp|P97310|MCM2_MOUSE	gnl|gene6554|XL-9_2-gene6554|rna19190|	381	366	RIRIQESPGKVAA	RITIQESPGKVAA	MCM2-mus381-xen366	3.413	7.02083	1.77104	2.81164
sp|P97310|MCM2_MOUSE	gnl|gene6554|XL-9_2-gene6554|rna19190|	40	25	RADALTSSPGRDL	RRDALTSSPGRDL	MCM2-mus40-xen25	4.873	2.2	2.28481	1.1375
sp|P97310|MCM2_MOUSE	gnl|gene6554|XL-9_2-gene6554|rna19190|	41	26	ADALTSSPGRDLP	RDALTSSPGRDLP	MCM2-mus41-xen26	0.818	0.730994	-0.289827	-0.452068
sp|P49717|MCM4_MOUSE	gnl|gene3021|XL-9_2-gene3021|rna8756|	119	120	QRPDLGSARKGLQ	QRPDLGSARKVKQ	MCM4-mus119-xen120	2.216	9.81818	1.14796	3.29546
sp|P49717|MCM4_MOUSE	gnl|gene14315|XL-9_2-gene14315|rna41699|	31	31	RSEESRSSPNRRR	RGEEVQSPPSQKR	MCM4-mus31-xen31	0.487	1.67647	-1.03801	0.745427
sp|P49717|MCM4_MOUSE	gnl|gene3021|XL-9_2-gene3021|rna8756|	31	31	RSEESRSSPNRRR	HGEEVQSPPSQRR	MCM4-mus31-xen31	0.487	0.363475	-1.03801	-1.46007
sp|Q61846|MELK_MOUSE	gnl|gene14443|XL-9_2-gene14443|rna42038|	490	498	LTTGVISPERRCR	EFANVISPERRCR	MELK-mus490-xen498	2.186	5.14667	1.12829	2.36364
sp|Q9CWE0|MFR1L_MOUSE	gnl|gene10146|XL-9_2-gene10146|rna29508|	221	249	HKTTCSSSEEDDC	QIETNMSDDDEDS	MFR1L-mus221-xen249	2.882	0.907104	1.52707	-0.14066
sp|Q9CWE0|MFR1L_MOUSE	gnl|gene10146|XL-9_2-gene10146|rna29508|	235	263	SLSKASSFADMMG	CLSKSNSFADMMG	MFR1L-mus235-xen263	0.847	0.315956	-0.239566	-1.66221
sp|Q76LS9|MINY1_MOUSE	gnl|gene10365|XL-9_2-gene10365|rna30130|	382	406	AEGGGGSPEKQLQ	KEASFGSPQLQRQ	MINY1-mus382-xen406	1.785	1.72549	0.835924	0.787006
sp|Q8VE19|MIOS_MOUSE	gnl|gene15026|XL-9_2-gene15026|rna43838|	766	771	QYGVSGSPTKSKV	QYGVSGSPTKSKF	MIOS-mus766-xen771	2.127	1.55556	1.08882	0.63743
sp|Q9JK91|MLH1_MOUSE	gnl|gene8767|XL-9_2-gene8767|rna25519|	481	472	KRHREDSDVEMVE	KRPRRVSDVEMLE	MLH1-mus481-xen472	1.866	1.36742	0.899949	0.451461
sp|Q921Y0|MOB1A_MOUSE	gnl|gene47399|XL-9_2-gene47399|rna92543|	35	35	LKHAEATLGSGNL	LKHAEATLGSGNL	MOB1A-mus35-xen35	1.652	8.13636	0.724214	3.02438
sp|Q9D1Q1|MPH6_MOUSE	gnl|gene2587|XL-9_2-gene2587|rna7516|	111	110	TVEVDVSDEEMAR	KMDVDVSDEEMAR	MPH6-mus111-xen110	0.574	0.746331	-0.800877	-0.422112
sp|Q07113|MPRI_MOUSE	gnl|gene41979|XL-9_2-gene41979|rna84684|	2337	2262	SCCRRSSGVSYKY	NCCRRSSAVSYKY	MPRI-mus2337-xen2262	1.105	0.95614	0.144046	-0.0647057
sp|Q8K296|MTMR3_MOUSE	gnl|gene1615|XL-9_2-gene1615|rna4714|	268	269	ASDSQSSISKVST	TDSSRASPGKMAN	MTMR3-mus268-xen269	3.714	35.0556	1.89297	5.13157
sp|Q7TPH6|MYCB2_MOUSE	gnl|gene3479|XL-9_2-gene3479|rna10112|	2911	2861	SPSGASSPRSSSP	NTPSAGSPRSASP	MYCB2-mus2911-xen2861	0.17	2.11299	-2.55639	1.07929
sp|Q8VDD5|MYH9_MOUSE	gnl|gene5948|XL-9_2-gene5948|rna17411|	1943	1947	KGTGDCSDEEVDG	KGVDEASDEDLDG	MYH9-mus1943-xen1947	1.044	1.36782	0.0621217	0.451874
sp|Q99M51|NCK1_MOUSE	gnl|gene2205|XL-9_2-gene2205|rna6415|	85	86	KVKRKPSVPDTAS	KVKRKQSMPDSAS	NCK1-mus85-xen86	1.024	1.4951	0.0342157	0.58024
sp|Q8VCB1|NDC1_MOUSE	gnl|gene15210|XL-9_2-gene15210|rna44391|	444	437	STPNVSSPFGTPF	SSLDIGSPFATPG	NDC1-mus444-xen437	2.977	26.75	1.57386	4.74147
sp|Q8VCB1|NDC1_MOUSE	gnl|gene15210|XL-9_2-gene15210|rna44391|	448	441	VSSPFGTPFGSSV	IGSPFATPGVKQM	NDC1-mus448-xen441	2.139	3.71264	1.09694	1.89245
sp|Q8VCB1|NDC1_MOUSE	gnl|gene13164|XL-9_2-gene13164|rna38278|	448	505	VSSPFGTPFGSSV	SSLDTGSPFTTPG	NDC1-mus448-xen505	2.139	22.5	1.09694	4.49185
sp|Q8VCB1|NDC1_MOUSE	gnl|gene15210|XL-9_2-gene15210|rna44391|	499	488	SAISNPSPCASVT	KNGSEVSPVMHRP	NDC1-mus499-xen488	3.79	42.7778	1.9222	5.41879
sp|Q8VCB1|NDC1_MOUSE	gnl|gene13164|XL-9_2-gene13164|rna38278|	499	559	SAISNPSPCASVT	SEVSSLSPVTLSP	NDC1-mus499-xen559	3.79	30.4167	1.9222	4.92679
sp|P19426|NELFE_MOUSE	gnl|gene3194|XL-9_2-gene3194|rna9250|	115	115	PFQRSMSADEDLQ	PFQRSISVDEEQT	NELFE-mus115-xen115	1.462	2.2459	0.547943	1.16729
sp|Q99L48|NMD3_MOUSE	gnl|gene3473|XL-9_2-gene3473|rna10093|	470	470	IPVESDTDDEGAP	VPVESDTDEEGAP	NMD3-mus470-xen470	0.671	0.592287	-0.575615	-0.755633
sp|E9Q5C9|NOLC1_MOUSE	gnl|gene45268|XL-9_2-gene45268|rna89569|	600	880	TADEATTPQAKKV	AECEAVTPENKKL	NOLC1-mus600-xen880	7.216	6.77778	2.8512	2.76081
sp|Q99J45|NRBP_MOUSE	gnl|gene16604|XL-9_2-gene16604|rna48512|	431	424	VPPSVKTPTPEPA	VPPSVKTPTPEPA	NRBP-mus431-xen424	2.849	11.0889	1.51046	3.47104
sp|Q9CZ44|NSF1C_MOUSE	gnl|gene2475|XL-9_2-gene2475|rna7217|	176	176	GERRRHSGQDVHV	GSRRQNSAQDVHV	NSF1C-mus176-xen176	1.088	11.5952	0.121679	3.53546
sp|Q8BH74|NU107_MOUSE	gnl|gene18986|XL-9_2-gene18986|rna55429|	46	127	DNFGTATPRSQII	ESWSNATPTRGPS	NU107-mus46-xen127	2.477	5.65	1.30859	2.49825
sp|Q99P88|NU155_MOUSE	gnl|gene8218|XL-9_2-gene8218|rna23932|	992	989	SKAAPQSPSVPKK	SKAAPQSPSVPKK	NU155-mus992-xen989	1.746	4.34722	0.804054	2.12009
sp|Q6ZQH8|NU188_MOUSE	gnl|gene18020|XL-9_2-gene18020|rna52668|	1727	1707	AAGVLPSPQGKAT	AGGLMPSPQPKGA	NU188-mus1727-xen1707	3.283	0.756863	1.71501	-0.401896
sp|Q80XU3|NUCKS_MOUSE	gnl|gene12108|XL-9_2-gene12108|rna35174|	113	159	LLEDVGSEEEPEE	LMGDGGSEDEEQE	NUCKS-mus113-xen159	2.702	1.07862	1.43403	0.109182
sp|Q5F2E7|NUFP2_MOUSE	gnl|gene36911|XL-9_2-gene36911|rna77445|	213	201	GADNDGSGSESGY	GAENDGSGSESGY	NUFP2-mus213-xen201	0.73	0.853535	-0.454032	-0.228477
sp|Q5F2E7|NUFP2_MOUSE	gnl|gene36911|XL-9_2-gene36911|rna77445|	221	209	SESGYTTPKKRKA	SESGYATPKKSED	NUFP2-mus221-xen209	2.585	1.47101	1.37016	0.556811
sp|Q8R4R6|NUP35_MOUSE	gnl|gene5325|XL-9_2-gene5325|rna15603|	100	93	IYDDISSPGLGST	IYDDIASPGLGST	NUP35-mus100-xen93	1.239	17.5333	0.309176	4.13203
sp|Q8R4R6|NUP35_MOUSE	gnl|gene15155|XL-9_2-gene15155|rna44245|	100	94	IYDDISSPGLGST	IYDDVASPGLGST	NUP35-mus100-xen94	1.239	20	0.309176	4.32193
sp|Q8R4R6|NUP35_MOUSE	gnl|gene5325|XL-9_2-gene5325|rna15603|	137	142	PGQSMFSPANIGQ	AASSVFSPATIGQ	NUP35-mus137-xen142	1.327	41.3333	0.408168	5.36923
sp|Q8R4R6|NUP35_MOUSE	gnl|gene15155|XL-9_2-gene15155|rna44245|	279	271	PTQSGSTPRVSTM	PTQSVGTPRAASM	NUP35-mus279-xen271	4.426	59.5	2.146	5.89482
sp|Q8R4R6|NUP35_MOUSE	gnl|gene5325|XL-9_2-gene5325|rna15603|	66	59	GVMEMRSPLLAGG	GVMEMRSPLFSGG	NUP35-mus66-xen59	2.781	1.08791	1.4756	0.121562
sp|Q8R4R6|NUP35_MOUSE	gnl|gene15155|XL-9_2-gene15155|rna44245|	66	60	GVMEMRSPLLAGG	GIMEVRSPLHSGG	NUP35-mus66-xen60	2.781	7.33333	1.4756	2.87447
sp|Q8R4R6|NUP35_MOUSE	gnl|gene15155|XL-9_2-gene15155|rna44245|	73	67	PLLAGGSPPQPVV	PLHSGGSPPQPVL	NUP35-mus73-xen67	1.245	42	0.316146	5.39232
sp|Q8BTS4|NUP54_MOUSE	gnl|gene45045|XL-9_2-gene45045|rna89228|	292	317	MTRTELSPAQIKQ	MAQTELSPVQIKQ	NUP54-mus292-xen317	4.511	7.66667	2.17345	2.9386
sp|P35486|ODPA_MOUSE	gnl|gene10229|XL-9_2-gene10229|rna29741|	293	303	YRYHGHSMSDPGV	YRYHGHSMSDPGV	ODPA-mus293-xen303	0.923	1.37309	-0.115597	0.457425
sp|Q9EQQ9|OGA_MOUSE	gnl|gene18656|XL-9_2-gene18656|rna54460|	364	352	KLENEGSDEDIET	KLENEGSDEDIET	OGA-mus364-xen352	2.595	1.02424	1.37573	0.0345572
sp|Q62422|OSTF1_MOUSE	gnl|gene12922|XL-9_2-gene12922|rna37546|	214	213	YLDDEDSDxxxxx	YLDDEDSDxxxxx	OSTF1-mus214-xen213	0.462	6.98718	-1.11404	2.80471
sp|Q6P9R2|OXSR1_MOUSE	gnl|gene17446|XL-9_2-gene17446|rna50953|	339	343	DGGWEWSDDEFDE	DGGWEWSDDELDE	OXSR1-mus339-xen343	1.351	1.1963	0.434028	0.258575
sp|Q8CCS6|PABP2_MOUSE	gnl|gene11058|XL-9_2-gene11058|rna32155|	146	141	EKQMNMSPPPGNA	EKQMNMSPPPGNA	PABP2-mus146-xen141	1.072	0.401709	0.100305	-1.31578
sp|Q6PCL9|PAPOG_MOUSE	gnl|gene34742|XL-9_2-gene34742|rna74416|	556	556	KPSNPDSPTGEIE	KSSRSDSPSLPDA	PAPOG-mus556-xen556	2.72	1.93889	1.44361	0.95523
sp|P58501|PAXB1_MOUSE	gnl|gene8351|XL-9_2-gene8351|rna24315|	264	228	EDENDASDDEDDD	EDENDASDDEDDD	PAXB1-mus264-xen228	0.758	2.45198	-0.39973	1.29395
sp|Q9R0L6|PCM1_MOUSE	gnl|gene7961|XL-9_2-gene7961|rna23217|	110	108	KQRINFSDLDQRS	KQKINFSDLDQRS	PCM1-mus110-xen108	2.869	5.23333	1.52055	2.38773
sp|Q9R0L6|PCM1_MOUSE	gnl|gene7961|XL-9_2-gene7961|rna23217|	121	119	RSIGSDSQGRATA	RSIGSDSQGRATA	PCM1-mus121-xen119	1.885	21.6667	0.914565	4.43741
sp|Q9R0L6|PCM1_MOUSE	gnl|gene7961|XL-9_2-gene7961|rna23217|	1766	1792	GPKNVRSDVSDQE	EVLSGKSDISEED	PCM1-mus1766-xen1792	0.62	0.39576	-0.68966	-1.3373
sp|Q9R0L6|PCM1_MOUSE	gnl|gene7961|XL-9_2-gene7961|rna23217|	65	63	RVTNAISPESSPG	RLTNDISPESSPG	PCM1-mus65-xen63	1.007	0.22069	0.0100637	-2.17991
sp|Q6P8I4|PCNP_MOUSE	gnl|gene108|XL-9_2-gene108|rna304|	119	129	FNEDEDSEPEEMP	FNDDDDSEPEEMP	PCNP-mus119-xen129	1.278	1.35842	0.353888	0.441933
sp|Q6P8I4|PCNP_MOUSE	gnl|gene108|XL-9_2-gene108|rna304|	139	149	KNIGRDTPTSAGP	KNIGRDTPTSAGP	PCNP-mus139-xen149	5.041	26.6667	2.33371	4.73697
sp|Q61823|PDCD4_MOUSE	gnl|gene14529|XL-9_2-gene14529|rna42307|	457	443	GRKRFVSEGDGGR	GRKRFVSEGDGGR	PDCD4-mus457-xen443	1.522	1.23864	0.605968	0.308753
sp|Q9R0A0|PEX14_MOUSE	gnl|gene36352|XL-9_2-gene36352|rna76647|	232	232	RRQFPPSPSAPKI	RRQFPPSPSASKI	PEX14-mus232-xen232	1.987	0.714859	0.990592	-0.484269
sp|Q8BX10|PGAM5_MOUSE	gnl|gene19888|XL-9_2-gene19888|rna58071|	79	71	KKRNVESGEDELT	SKINGETGEEELQ	PGAM5-mus79-xen71	1.025	0.907859	0.0356239	-0.13946
sp|Q9D0F9|PGM1_MOUSE	gnl|gene30322|XL-9_2-gene30322|rna69834|	117	193	GIILTASHNPGGP	GIILTASHNPGGP	PGM1-mus117-xen193	1.129	2.96491	0.175045	1.56799
sp|Q8CAA7|PGM2L_MOUSE	gnl|gene4261|XL-9_2-gene4261|rna12410|	175	173	GVMITASHNRKED	GVMVTASHNRKED	PGM2L-mus175-xen173	1.153	0.987988	0.205393	-0.0174346
sp|O55022|PGRC1_MOUSE	gnl|gene1577|XL-9_2-gene1577|rna4608|	181	162	EEPTVYSDDEEPK	EEPTEYTDDEDAK	PGRC1-mus181-xen162	1.151	1.81643	0.202888	0.861102
sp|Q9D4J7|PHF6_MOUSE	gnl|gene2578|XL-9_2-gene2578|rna7489|	138	172	KKTAHNSEADLEE	KEQVRNSDDELEG	PHF6-mus138-xen172	2.083	0.381166	1.05866	-1.39151
sp|Q8BWW9|PKN2_MOUSE	gnl|gene4414|XL-9_2-gene4414|rna12854|	359	330	VALPGWSPSDNRS	TASVQGSPGESKN	PKN2-mus359-xen330	2.423	2.88889	1.27679	1.53051
sp|Q68FH0|PKP4_MOUSE	gnl|gene46192|XL-9_2-gene46192|rna90847|	230	264	VTSTGVSPSRGSL	VIGSGVSPSRGSL	PKP4-mus230-xen264	2.892	1.45267	1.53207	0.538712
sp|Q9QXS1|PLEC_MOUSE	gnl|gene20187|XL-9_2-gene20187|rna58908|	1443	1333	QLEPVASPAKKPK	QLEPAASPVKKPK	PLEC-mus1443-xen1333	2.483	2.23899	1.31208	1.16285
sp|Q07832|PLK1_MOUSE	gnl|gene8349|XL-9_2-gene8349|rna24312|	210	201	EGERKKTLCGTPN	DGERKKTLCGTPN	PLK1-mus210-xen201	2.263	16.7778	1.17824	4.06848
sp|Q7TSI3|PP6R1_MOUSE	gnl|gene4445|XL-9_2-gene4445|rna12968|	636	638	GQGSAESDGEYGA	DEEDEGSDGEDIW	PP6R1-mus636-xen638	0.963	1.20202	-0.0543923	0.265461
sp|Q7TSC1|PRC2A_MOUSE	gnl|gene43340|XL-9_2-gene43340|rna86694|	1667	1546	PCSQRSSPDGGLK	NSSQRSSPDGGLK	PRC2A-mus1667-xen1546	2.322	17.2963	1.21537	4.11239
sp|Q7TSC1|PRC2A_MOUSE	gnl|gene17931|XL-9_2-gene17931|rna52424|	454	467	RQRRKQSSSEISL	RQRRKQSSSEISQ	PRC2A-mus454-xen467	3.266	4.20833	1.70752	2.07325
sp|P33610|PRI2_MOUSE	gnl|gene20087|XL-9_2-gene20087|rna58623|	470	476	EISQPETPQHKPS	EQTARDSPAVTAS	PRI2-mus470-xen476	3.692	9.38462	1.8844	3.2303
sp|O70435|PSA3_MOUSE	gnl|gene18364|XL-9_2-gene18364|rna53646|	250	250	LKEEDESDDDNMx	LEEEDDSDDDNMx	PSA3-mus250-xen250	0.909	1.86772	-0.137648	0.901282
sp|Q8VDM4|PSMD2_MOUSE	gnl|gene10312|XL-9_2-gene10312|rna29971|	363	358	RFGGSGSQVDSAR	RFGSSGSQVDSAR	PSMD2-mus363-xen358	0.981	1.25926	-0.027675	0.332575
tr|Q5NCJ1|Q5NCJ1_MOUSE	gnl|gene13877|XL-9_2-gene13877|rna40405|	1165	1178	AKSSEMSPVPLRS	SAKSDMSPAPLRP	Q5NCJ1-mus1165-xen1178	3.063	4.89583	1.61495	2.29155
tr|Q6NV99|Q6NV99_MOUSE	gnl|gene11737|XL-9_2-gene11737|rna34096|	550	561	RVVLSDSPQLSER	DYIVSESPRSSGG	Q6NV99-mus550-xen561	2.802	8.69697	1.48646	3.12051
sp|Q80TM6|R3HD2_MOUSE	gnl|gene25576|XL-9_2-gene25576|rna65075|	381	361	PVTKASSFSGISI	PVTKASSFSGISI	R3HD2-mus381-xen361	1.481	4.67544	0.566572	2.2251
sp|P55258|RAB8A_MOUSE	gnl|gene3057|XL-9_2-gene3057|rna8854|	181	181	KKLEGNSPQGSSH	KRMEGNSPQGSNQ	RAB8A-mus181-xen181	5.214	33.9167	2.38239	5.08392
sp|O35551|RABE1_MOUSE	gnl|gene46107|XL-9_2-gene46107|rna90736|	407	398	GLRRAQSTDSLGT	GLRRAQSSDSLGA	RABE1-mus407-xen398	1.77	0.469388	0.823749	-1.09115
sp|O35551|RABE1_MOUSE	gnl|gene47580|XL-9_2-gene47580|rna92784|	410	401	RAQSTDSLGTSSS	RAQSSDSLGASGP	RABE1-mus410-xen401	1.588	0.853107	0.667211	-0.229201
sp|O35551|RABE1_MOUSE	gnl|gene46107|XL-9_2-gene46107|rna90736|	410	401	RAQSTDSLGTSSS	RAQSSDSLGASGP	RABE1-mus410-xen401	1.588	0.482883	0.667211	-1.05025
sp|Q9CT10|RANB3_MOUSE	gnl|gene8212|XL-9_2-gene8212|rna23914|	463	488	ATEEEDSDEDAVL	QSNEEDSDDDDVL	RANB3-mus463-xen488	1.419	1.3442	0.504875	0.426751
sp|Q60973|RBBP7_MOUSE	gnl|gene15462|XL-9_2-gene15462|rna45137|	354	354	KIGEEQSAEDAED	KIGEEQSAEDAED	RBBP7-mus354-xen354	1.336	1.93561	0.41792	0.952785
sp|Q8VH51|RBM39_MOUSE	gnl|gene41101|XL-9_2-gene41101|rna83407|	136	151	PFRKDKSPVREPI	PPKREKSPVRGPI	RBM39-mus136-xen151	1.262	0.974359	0.335712	-0.0374747
sp|Q8VH51|RBM39_MOUSE	gnl|gene41101|XL-9_2-gene41101|rna83407|	97	112	FRGRYRSPYSGPK	FKGHYRSPYSGPK	RBM39-mus97-xen112	1.27	0.954545	0.344828	-0.0671142
sp|Q9ERU9|RBP2_MOUSE	gnl|gene7504|XL-9_2-gene7504|rna21879|	21	21	VQGSAPSPREKSM	AQNSASSPREKSM	RBP2-mus21-xen21	2.679	15.1667	1.42169	3.92283
sp|Q9ERU9|RBP2_MOUSE	gnl|gene14504|XL-9_2-gene14504|rna42239|	21	21	VQGSAPSPREKSM	AQNSASSPREKSM	RBP2-mus21-xen21	2.679	9.60606	1.42169	3.26394
sp|Q9ERU9|RBP2_MOUSE	gnl|gene7504|XL-9_2-gene7504|rna21879|	2729	2753	GEDEDGSDEDVVH	GEDADGSDEEVVH	RBP2-mus2729-xen2753	1.697	17.2037	0.762987	4.10465
sp|Q8K072|REEP4_MOUSE	gnl|gene91|XL-9_2-gene91|rna257|	152	152	GRLRSFSMQDLRS	GRLRSFSMQDLRA	REEP4-mus152-xen152	1.24	0.709333	0.31034	-0.495464
sp|Q9EPU0|RENT1_MOUSE	gnl|gene12327|XL-9_2-gene12327|rna35833|	1102	1076	QIDVALSQDSTYQ	QIDVALSQDSTYQ	RENT1-mus1102-xen1076	2.023	1.31667	1.0165	0.39689
sp|O54916|REPS1_MOUSE	gnl|gene1971|XL-9_2-gene1971|rna5733|	708	521	VRRRLKSEDELRP	VRRRLKSEDELRP	REPS1-mus708-xen521	1.266	0.697842	0.340277	-0.519028
sp|Q9CQV4|RETR3_MOUSE	gnl|gene7415|XL-9_2-gene7415|rna21611|	313	309	TPLTEGSEDLDGH	TPLTEGSEDLDRH	RETR3-mus313-xen309	0.879	0.732143	-0.186065	-0.449803
sp|Q9CQV4|RETR3_MOUSE	gnl|gene7415|XL-9_2-gene7415|rna21611|	320	316	EDLDGHSDPEESF	EDLDRHSDPEESF	RETR3-mus320-xen316	0.745	3.4	-0.424688	1.76553
sp|Q9ERD6|RGPS2_MOUSE	gnl|gene15677|XL-9_2-gene15677|rna45768|	308	308	GPDIGASPQGGRK	GPEVGASPTSLRK	RGPS2-mus308-xen308	1.984	18.0303	0.988412	4.17235
sp|Q8C0D4|RHG12_MOUSE	gnl|gene9644|XL-9_2-gene9644|rna28069|	584	562	EEETPDSPGVEKH	DDNVPESPVDKHA	RHG12-mus584-xen562	2.416	3.84444	1.27262	1.94278
sp|Q3TIR3|RIC8A_MOUSE	gnl|gene36844|XL-9_2-gene36844|rna77360|	440	449	YSEDEDTDTEEYR	YSEDDDTDTEEYR	RIC8A-mus440-xen449	0.713	1.68539	-0.488026	0.753085
sp|Q80XE1|RIC8B_MOUSE	gnl|gene14860|XL-9_2-gene14860|rna43367|	468	442	RGDNWYSEDEDTD	RGDRWYSDDEDTD	RIC8B-mus468-xen442	1.702	2.12121	0.767231	1.08489
sp|Q6QI06|RICTR_MOUSE	gnl|gene2056|XL-9_2-gene2056|rna5965|	21	21	IRGRNDSGEENVP	LRGRNDSGEENVP	RICTR-mus21-xen21	1.178	2.24044	0.23634	1.16378
sp|P11157|RIR2_MOUSE	gnl|gene18171|XL-9_2-gene18171|rna53098|	20	16	QQQLQLSPLKRLT	QLNDNVSPMKNLT	RIR2-mus20-xen16	2.084	1.51351	1.05936	0.597902
sp|P14869|RLA0_MOUSE	gnl|gene8910|XL-9_2-gene8910|rna25959|	304	301	AEAKEESEESDED	DEKQEESEESDDD	RLA0-mus304-xen301	1.742	1.49817	0.800745	0.5832
sp|P14869|RLA0_MOUSE	gnl|gene8910|XL-9_2-gene8910|rna25959|	307	304	KEESEESDEDMGF	QEESEESDDDMGF	RLA0-mus307-xen304	1.382	1.59783	0.466758	0.67611
sp|P99027|RLA2_MOUSE	gnl|gene10567|XL-9_2-gene10567|rna30705|	102	114	DEKKEESEESDDD	EEKKEESEESDDD	RLA2-mus102-xen114	1.01	2.18519	0.0143553	1.12776
sp|P99027|RLA2_MOUSE	gnl|gene10567|XL-9_2-gene10567|rna30705|	105	117	KEESEESDDDMGF	KEESEESDDDMGF	RLA2-mus105-xen117	1.023	1.14363	0.0328061	0.193622
sp|P99027|RLA2_MOUSE	gnl|gene10567|XL-9_2-gene10567|rna30705|	79	91	VSAAPGSAAPAAG	AAAGGGSAAPAAG	RLA2-mus79-xen91	3.171	3.98413	1.66494	1.99426
sp|P58283|RN216_MOUSE	gnl|gene17067|XL-9_2-gene17067|rna49859|	407	421	KKWQELSPETSGK	KHWQELSPDPSGK	RN216-mus407-xen421	1.697	2.36667	0.762987	1.24286
sp|Q99K70|RRAGC_MOUSE	gnl|gene2852|XL-9_2-gene2852|rna8282|	94	78	ETLFLESTNKIYK	ETLFLESTNKIYK	RRAGC-mus94-xen78	1.783	0.69774	0.834307	-0.519238
sp|P62858|RS28_MOUSE	gnl|gene16602|XL-9_2-gene16602|rna48509|	23	23	VLGRTGSQGQCTQ	VLGRTGSQGQCTQ	RS28-mus23-xen23	0.986	1.22424	-0.0203404	0.291889
sp|P97351|RS3A_MOUSE	gnl|gene14320|XL-9_2-gene14320|rna41710|	263	263	EPPVQESVxxxxx	EPPVQESVxxxxx	RS3A-mus263-xen263	1.93	2.46774	0.948601	1.30319
sp|Q8CCI5|RYBP_MOUSE	gnl|gene8217|XL-9_2-gene8217|rna23930|	227	337	SAVNDESFxxxxx	SVVNDESFxxxxx	RYBP-mus227-xen337	2.227	4.02703	1.1551	2.00972
sp|Q7TPE5|S7A6O_MOUSE	gnl|gene41914|XL-9_2-gene41914|rna84555|	156	170	TDCRKTSDPDVIL	KYLEKDSEPETIL	S7A6O-mus156-xen170	0.844	1.59574	-0.244685	0.67423
sp|Q80YR5|SAFB2_MOUSE	gnl|gene1851|XL-9_2-gene1851|rna5404|	488	378	VVTNARSPGARCY	VVTNARSPGARCY	SAFB2-mus488-xen378	4.587	4.27451	2.19755	2.09576
sp|Q8BX22|SALL4_MOUSE	gnl|gene11114|XL-9_2-gene11114|rna32304|	785	748	QECQSRSPDATET	EYPNGKSPTQSEA	SALL4-mus785-xen748	1.219	1.66092	0.285698	0.731982
sp|E9QAT4|SC16A_MOUSE	gnl|gene15905|XL-9_2-gene15905|rna46486|	2101	2084	SLTRAPSLTSDSE	SMGIQPSPPPASI	SC16A-mus2101-xen2084	1.841	8.15873	0.88049	3.02834
sp|O08547|SC22B_MOUSE	gnl|gene41963|XL-9_2-gene41963|rna84651|	137	142	ARRNLGSINTELQ	ARRNLSSVNTELQ	SC22B-mus137-xen142	2.468	9.85417	1.30334	3.30073
sp|Q8BR65|SDS3_MOUSE	gnl|gene42438|XL-9_2-gene42438|rna85337|	237	230	RPASPSSPEHLPA	RPVSPSSPEHLPT	SDS3-mus237-xen230	2.21	1.10648	1.14405	0.145979
sp|Q8BU14|SEC62_MOUSE	gnl|gene2044|XL-9_2-gene2044|rna5930|	158	201	KEETPGTPKKKET	KDETPGTPKKKET	SEC62-mus158-xen201	1.215	2.04444	0.280956	1.03171
sp|Q3UJB0|SF3B2_MOUSE	gnl|gene2406|XL-9_2-gene2406|rna7007|	290	177	RSSLGQSASETEE	DSRYVNTASEAEE	SF3B2-mus290-xen177	1.611	1.81746	0.687956	0.861924
sp|Q3UJB0|SF3B2_MOUSE	gnl|gene2406|XL-9_2-gene2406|rna7007|	292	179	SLGQSASETEEDT	RYVNTASEAEEDN	SF3B2-mus292-xen179	1.611	0.846405	0.687956	-0.24058
sp|Q8BP27|SFR1_MOUSE	gnl|gene13097|XL-9_2-gene13097|rna38077|	115	21	PRENPPSPHSNSS	NLCSPDSPKDTVP	SFR1-mus115-xen21	0.32	2.03704	-1.64386	1.02647
sp|Q60520|SIN3A_MOUSE	gnl|gene13514|XL-9_2-gene13514|rna39321|	941	948	KRDKSDSPAIQLR	KRDKNDSPAIQLR	SIN3A-mus941-xen948	2.129	2.0303	1.09018	1.0217
sp|Q8C263|SKA3_MOUSE	gnl|gene46160|XL-9_2-gene46160|rna90802|	39	40	DSDFEDSPGRILH	NEYEEESPMRVLH	SKA3-mus39-xen40	6.149	2.83607	2.62035	1.50389
sp|Q6NZR5|SKI2_MOUSE	gnl|gene48631|XL-9_2-gene48631|rna94270|	253	256	PLVRASSLEDLVL	GLQRSNSLEELGL	SKI2-mus253-xen256	1.556	0.854962	0.637842	-0.226068
sp|Q8CI08|SLAI2_MOUSE	gnl|gene13234|XL-9_2-gene13234|rna38519|	147	212	PMQKSVSPLVWCR	AEQKPDSPLKWCR	SLAI2-mus147-xen212	5.403	2.85586	2.43376	1.51392
sp|Q8CI08|SLAI2_MOUSE	gnl|gene13234|XL-9_2-gene13234|rna38519|	160	225	QVLDYPSPDVECA	QVLDHHSPETEAA	SLAI2-mus160-xen225	4.514	3.78205	2.17441	1.91917
sp|P97801|SMN_MOUSE	gnl|gene2239|XL-9_2-gene2239|rna6503|	25	19	RRGTGQSDDSDIW	RRGAGQSDDSDIW	SMN-mus25-xen19	1.489	2.16895	0.574344	1.117
sp|P97801|SMN_MOUSE	gnl|gene18263|XL-9_2-gene18263|rna53342|	25	40	RRGTGQSDDSDIW	RRGAAQSDDSDIW	SMN-mus25-xen40	1.489	1.28116	0.574344	0.35745
sp|P97496|SMRC1_MOUSE	gnl|gene1154|XL-9_2-gene1154|rna3352|	309	396	NEEPVRSPERRDR	NEEAVRSPERKER	SMRC1-mus309-xen396	1.12	0.755556	0.163499	-0.40439
sp|Q78PY7|SND1_MOUSE	gnl|gene13122|XL-9_2-gene13122|rna38144|	909	906	ADEFGYSRxxxxx	AAEFGYSRxxxxx	SND1-mus909-xen906	2.507	5.96667	1.32596	2.57693
sp|Q62261|SPTB2_MOUSE	gnl|gene5804|XL-9_2-gene5804|rna16982|	2137	2205	LPAEQGSPRMAGT	LPSDQESPRMVEN	SPTB2-mus2137-xen2205	2.455	7.88333	1.29572	2.97881
sp|Q62261|SPTB2_MOUSE	gnl|gene5804|XL-9_2-gene5804|rna16982|	2164	2232	TSSKESSPVPSPT	SSSKESSPIPSPT	SPTB2-mus2164-xen2232	2.259	0.0519878	1.17568	-4.26568
sp|Q62261|SPTB2_MOUSE	gnl|gene5804|XL-9_2-gene5804|rna16982|	2168	2236	ESSPVPSPTLDRK	ESSPIPSPTADRK	SPTB2-mus2168-xen2236	1.6	0.78607	0.678072	-0.347271
sp|O70551|SRPK1_MOUSE	gnl|gene47614|XL-9_2-gene47614|rna92826|	450	417	IRADTPSGDEQEP	SIRKEISSEEQEG	SRPK1-mus450-xen417	0.854	1.01543	-0.227692	0.0220938
sp|O70551|SRPK1_MOUSE	gnl|gene47614|XL-9_2-gene47614|rna92826|	51	51	EEEILGSDDDEQE	EEEILGSDDDEQE	SRPK1-mus51-xen51	0.916	0.992248	-0.12658	-0.0112273
sp|Q9D0B0|SRSF9_MOUSE	gnl|gene7976|XL-9_2-gene7976|rna23258|	212	223	PYQSRGSPHYFSP	PYQSSRSPRYSSP	SRSF9-mus212-xen223	2.638	1.22348	1.39944	0.290996
sp|Q08943|SSRP1_MOUSE	gnl|gene38170|XL-9_2-gene38170|rna79225|	444	353	YDDYADSDEDQHD	YDDYADSDEDQHD	SSRP1-mus444-xen353	1.453	0.996997	0.539035	-0.00433894
sp|Q8CJ67|STAU2_MOUSE	gnl|gene11544|XL-9_2-gene11544|rna33519|	416	544	KGILHLSPDVYQE	KGILHLSPDVYQE	STAU2-mus416-xen544	5.484	17.6333	2.45523	4.14023
sp|Q9WTK7|STK11_MOUSE	gnl|gene18785|XL-9_2-gene18785|rna54834|	31	34	FIHRIDSTEVIYQ	FIHRIDSTEVIYQ	STK11-mus31-xen34	1.686	0.852459	0.753605	-0.230298
sp|Q9JI10|STK3_MOUSE	gnl|gene34498|XL-9_2-gene34498|rna74090|	316	315	EEEEENSDEDELD	EEEDENSEEDELD	STK3-mus316-xen315	1.471	0.532091	0.556797	-0.910255
sp|Q8C079|STRP1_MOUSE	gnl|gene44715|XL-9_2-gene44715|rna88743|	335	253	RNMRAASPPASAS	RNMRAASPPASAS	STRP1-mus335-xen253	3.153	1.70175	1.65673	0.767023
sp|Q3TDQ1|STT3B_MOUSE	gnl|gene11688|XL-9_2-gene11688|rna33964|	495	497	NPPVEDSSDEDDK	NPPVEDSSDEERN	STT3B-mus495-xen497	1.274	1.74775	0.349365	0.805497
sp|P70452|STX4_MOUSE	gnl|gene3836|XL-9_2-gene3836|rna11187|	15	13	RQGDNISDDEDEV	ELRQDDSDSEADE	STX4-mus15-xen13	1.317	0.887978	0.397255	-0.171404
sp|Q8C341|SUCO_MOUSE	gnl|gene20172|XL-9_2-gene20172|rna58861|	1051	1028	KSNQYPSPKRCFS	KSNNYPSPKRCFS	SUCO-mus1051-xen1028	5.978	4.44792	2.57966	2.15313
sp|Q6NXN1|SZRD1_MOUSE	gnl|gene17521|XL-9_2-gene17521|rna51164|	107	126	RILGSASPEEEQE	RILGSASPEEEQE	SZRD1-mus107-xen126	3.719	7.79365	1.89491	2.9623
sp|Q3UKC1|TAXB1_MOUSE	gnl|gene8724|XL-9_2-gene8724|rna25392|	693	705	PPVRVPSWEDNVV	PPVRANSWGLEDK	TAXB1-mus693-xen705	1.901	1.97222	0.926759	0.979822
sp|Q8R3D1|TBC13_MOUSE	gnl|gene13153|XL-9_2-gene13153|rna38231|	184	184	GVTNMSSPHKNSA	GVTNVSSPLKSSA	TBC13-mus184-xen184	1.87	1.58772	0.903038	0.666956
sp|Q9D1E6|TBCB_MOUSE	gnl|gene7638|XL-9_2-gene7638|rna22271|	110	111	VEKYEISPEAYER	VEKYEISDNSYDK	TBCB-mus110-xen111	3.723	0.637795	1.89647	-0.648835
sp|Q3U0J8|TBD2B_MOUSE	gnl|gene1963|XL-9_2-gene1963|rna5711|	959	965	DKGELVSDEEEDT	ERRDLISDDEEDS	TBD2B-mus959-xen965	1.262	1.15123	0.335712	0.203182
sp|P10711|TCEA1_MOUSE	gnl|gene9321|XL-9_2-gene9321|rna27100|	100	101	AISSQNSPEAREE	PAPAQNSPEPKEE	TCEA1-mus100-xen101	1.917	2.90698	0.93885	1.53952
sp|P11031|TCP4_MOUSE	gnl|gene13228|XL-9_2-gene13228|rna38497|	118	143	QLKEQISDIDDAV	QLKEQMSDIDDAI	TCP4-mus118-xen143	1.48	0.796875	0.565597	-0.327575
sp|P11031|TCP4_MOUSE	gnl|gene13228|XL-9_2-gene13228|rna38497|	55	81	LASSKQSSSSRDD	GASSRQSSGPEDN	TCP4-mus55-xen81	6.766	41.1111	2.7583	5.36146
sp|P80318|TCPG_MOUSE	gnl|gene14983|XL-9_2-gene14983|rna43729|	252	251	EYKKGESQTDIEI	EYKKGESQTEIEI	TCPG-mus252-xen251	6.617	2.91358	2.72618	1.54279
sp|Q9R0Q7|TEBP_MOUSE	gnl|gene41972|XL-9_2-gene41972|rna84667|	113	113	KDWEDDSDEDMSN	KDWEDDSDEDMSN	TEBP-mus113-xen113	0.915	1.25595	-0.128156	0.328782
sp|Q9ERA6|TFP11_MOUSE	gnl|gene3544|XL-9_2-gene3544|rna10317|	60	56	VWAERDSDEERPS	MWAEHDSDDERPS	TFP11-mus60-xen56	1.145	1.19142	0.195348	0.252681
sp|Q64127|TIF1A_MOUSE	gnl|gene50996|XL-9_2-gene50996|rna97724|	1029	1061	CKFSDDSDDDFVQ	TAASGDSDDEFVA	TIF1A-mus1029-xen1061	1.184	1.35955	0.243669	0.44313
sp|Q8BKI2|TNR6B_MOUSE	gnl|gene45248|XL-9_2-gene45248|rna89540|	1793	1905	DPHRMGSPAPLLP	DAHRMGSPAPLLP	TNR6B-mus1793-xen1905	0.397	3.84848	-1.33279	1.94429
sp|O88746|TOM1_MOUSE	gnl|gene14314|XL-9_2-gene14314|rna41696|	462	469	RLPNLASPSAEGP	RMPTLPSPGTEPP	TOM1-mus462-xen469	2.852	2.80488	1.51197	1.48794
sp|O88746|TOM1_MOUSE	gnl|gene10380|XL-9_2-gene10380|rna30171|	462	476	RLPNLASPSAEGP	HIPSLSSPGTEPP	TOM1-mus462-xen476	2.852	11.8889	1.51197	3.57154
sp|Q9CZW5|TOM70_MOUSE	gnl|gene4771|XL-9_2-gene4771|rna13929|	94	58	TPEGRASPALGSG	TPEGSASPVPSEG	TOM70-mus94-xen58	1.84	4.12903	0.879706	2.0458
sp|Q6ZQF0|TOPB1_MOUSE	gnl|gene1197|XL-9_2-gene1197|rna3482|	1107	1158	CNSASSTPDSARS	FDNSPCTPEGARS	TOPB1-mus1107-xen1158	3.383	1.02105	1.7583	0.0300572
sp|Q6ZQF0|TOPB1_MOUSE	gnl|gene1197|XL-9_2-gene1197|rna3482|	866	916	KLSSPLSEVIVRN	TQSTPLSEVIGRN	TOPB1-mus866-xen916	3.586	24	1.84238	4.58496
sp|P97473|TRBP2_MOUSE	gnl|gene3022|XL-9_2-gene3022|rna8760|	245	247	PDDDHFSIGVSSR	PEEDQFSMGKLDG	TRBP2-mus245-xen247	1.228	1.67965	0.296311	0.748164
sp|G5E870|TRIPC_MOUSE	gnl|gene44927|XL-9_2-gene44927|rna89060|	312	348	TKKRSESPPAELP	TKKRSESPPAELP	TRIPC-mus312-xen348	2.967	1.11224	1.569	0.153474
sp|Q9EP53|TSC1_MOUSE	gnl|gene12198|XL-9_2-gene12198|rna35458|	502	487	PRGGFDSPFYRDS	LRGGFDSPFSLRC	TSC1-mus502-xen487	1.947	14.2222	0.961253	3.83007
sp|Q9D8T4|TV23B_MOUSE	gnl|gene42112|XL-9_2-gene42112|rna84832|	14	14	DDTEDVSLFDAEE	DETEDVSLFDAED	TV23B-mus14-xen14	1.602	1.75214	0.679874	0.809115
sp|Q9D8T4|TV23B_MOUSE	gnl|gene42112|XL-9_2-gene42112|rna84832|	6	6	xMLSQDSNDDTED	xMLRQDSNDETED	TV23B-mus6-xen6	1.611	1.64773	0.687956	0.720477
sp|Q6ZPJ3|UBE2O_MOUSE	gnl|gene35453|XL-9_2-gene35453|rna75431|	833	816	EQLLTGSPTSPTV	EQLLTGSPTSPTA	UBE2O-mus833-xen816	1.871	0.484018	0.90381	-1.04687
sp|Q6ZPJ3|UBE2O_MOUSE	gnl|gene18660|XL-9_2-gene18660|rna54475|	833	819	EQLLTGSPTSPTV	EQLLTGSPTSPTV	UBE2O-mus833-xen819	1.871	0.350877	0.90381	-1.51096
sp|Q6ZPJ3|UBE2O_MOUSE	gnl|gene35453|XL-9_2-gene35453|rna75431|	836	819	LTGSPTSPTVEPE	LTGSPTSPTAEPE	UBE2O-mus836-xen819	0.769	1.3252	-0.378944	0.406214
sp|Q80WC1|UBN2_MOUSE	gnl|gene46876|XL-9_2-gene46876|rna91821|	238	240	FRQASDTEEDDFT	FRQASDSENEDFV	UBN2-mus238-xen240	1.385	0.591522	0.469886	-0.757496
sp|B1AY13|UBP24_MOUSE	gnl|gene38894|XL-9_2-gene38894|rna80271|	2044	2008	RVSDQNSPVLPKK	RVSDQNSPVLPKK	UBP24-mus2044-xen2008	1.54	1.08	0.62293	0.111031
sp|B1AY13|UBP24_MOUSE	gnl|gene35042|XL-9_2-gene35042|rna74820|	2601	2559	LQQGSESPMMIGE	MQQGPDSPMIIGE	UBP24-mus2601-xen2559	1.346	2.85417	0.428678	1.51307
sp|B1AY13|UBP24_MOUSE	gnl|gene38894|XL-9_2-gene38894|rna80271|	2601	2561	LQQGSESPMMIGE	MQQGPDSPMIIGE	UBP24-mus2601-xen2561	1.346	2.50725	0.428678	1.3261
sp|Q80X50|UBP2L_MOUSE	gnl|gene1739|XL-9_2-gene1739|rna5058|	487	424	TSAPQMSPGSSDN	NVAPQMSPVSSEN	UBP2L-mus487-xen424	2.549	0.786822	1.34993	-0.345891
sp|Q80X50|UBP2L_MOUSE	gnl|gene38880|XL-9_2-gene38880|rna80243|	629	647	PSSISSSPQKDLT	TSSSSSSPQKDLS	UBP2L-mus629-xen647	0.861	1.30802	-0.215915	0.387381
sp|Q80U87|UBP8_MOUSE	gnl|gene6322|XL-9_2-gene6322|rna18493|	680	665	KLKRSYSSPDITQ	KLKRSYSSPDLAQ	UBP8-mus680-xen665	1.147	1.23397	0.197865	0.303312
sp|P70362|UFD1_MOUSE	gnl|gene3975|XL-9_2-gene3975|rna11566|	247	247	GVEPSPSPIKPGD	GIDPSPSPLKPED	UFD1-mus247-xen247	3.223	32.4167	1.6884	5.01866
sp|Q8VDF2|UHRF1_MOUSE	gnl|gene45331|XL-9_2-gene45331|rna89657|	289	290	RRPLIASPSQPPP	TYLNTESPQKRQN	UHRF1-mus289-xen290	3.279	1.49593	1.71326	0.581047
sp|Q8VDF2|UHRF1_MOUSE	gnl|gene45331|XL-9_2-gene45331|rna89657|	639	631	LEQGPSSSKTGKS	EDEPIDSPSKGKR	UHRF1-mus639-xen631	8.058	1.44314	3.01042	0.529209
sp|Q8VDF2|UHRF1_MOUSE	gnl|gene45331|XL-9_2-gene45331|rna89657|	649	641	GKSKQKSTGPTLS	GKRKRNSDNEQTA	UHRF1-mus649-xen641	2.396	2.46528	1.26063	1.30175
sp|Q8VDF2|UHRF1_MOUSE	gnl|gene38671|XL-9_2-gene38671|rna79914|	91	90	ERDSELSDSDSGY	HKECKLSDADSGC	UHRF1-mus91-xen90	1.003	10.0417	0.00432161	3.32793
sp|P63044|VAMP2_MOUSE	gnl|gene43817|XL-9_2-gene43817|rna87412|	80	78	ASQFETSAAKLKR	ASQFETSAAKLKR	VAMP2-mus80-xen78	1.638	2.57246	0.711935	1.36315
sp|Q60932|VDAC1_MOUSE	gnl|gene3981|XL-9_2-gene3981|rna11584|	117	104	TFDSSFSPNTGKK	TFDSSFSPNTGKK	VDAC1-mus117-xen104	3.189	1.14176	1.6731	0.191263
sp|Q8VDJ3|VIGLN_MOUSE	gnl|gene3453|XL-9_2-gene3453|rna10038|	944	942	KETDPGSPRRCDI	KSTDPESPKKCDI	VIGLN-mus944-xen942	2.827	4.62857	1.49927	2.21057
sp|Q8VDJ3|VIGLN_MOUSE	gnl|gene18461|XL-9_2-gene18461|rna53913|	944	942	KETDPGSPRRCDI	KSIDPDSPKKCDI	VIGLN-mus944-xen942	2.827	3.63889	1.49927	1.8635
sp|P15920|VPP2_MOUSE	gnl|gene43933|XL-9_2-gene43933|rna87595|	695	690	TLVRKDSEEEVSL	TLVRRGSEEELSL	VPP2-mus695-xen690	0.883	1.08108	-0.179515	0.112475
sp|Q8CI71|VPS50_MOUSE	gnl|gene19006|XL-9_2-gene19006|rna55479|	559	559	AYQDYDSDSDVPE	AYQEYDSDSDVPE	VPS50-mus559-xen559	1.176	1.0132	0.233888	0.0189209
sp|Q65Z40|WAPL_MOUSE	gnl|gene16820|XL-9_2-gene16820|rna49159|	77	77	DPFGFDSDDESLP	DPFGFDSDEDSIP	WAPL-mus77-xen77	1.145	0.991736	0.195348	-0.0119726
sp|Q6PGL7|WASC2_MOUSE	gnl|gene4630|XL-9_2-gene4630|rna13511|	343	345	LTDEDFSPFGSRG	LTDEDFSPFGSKG	WASC2-mus343-xen345	3.4	32.5333	1.76553	5.02385
sp|Q6PGL7|WASC2_MOUSE	gnl|gene4630|XL-9_2-gene4630|rna13511|	614	610	SALLFSSDEEDQW	KSGLFSSDEEDPI	WASC2-mus614-xen610	1.48	0.572614	0.565597	-0.804365
sp|Q6PGL7|WASC2_MOUSE	gnl|gene4630|XL-9_2-gene4630|rna13511|	798	785	RTRTVLSLFDEDE	KSKNVLSLFDDEE	WASC2-mus798-xen785	6.884	14.4583	2.78325	3.85383
sp|Q6NVE8|WDR44_MOUSE	gnl|gene14239|XL-9_2-gene14239|rna41496|	405	405	SNDATQSDDEEKL	SNDAAQSDDEEKP	WDR44-mus405-xen405	1.204	1.25725	0.267835	0.330267
sp|Q80ZK9|WDTC1_MOUSE	gnl|gene11217|XL-9_2-gene11217|rna32623|	511	499	STSRKDSISEDEM	SGGRKDSLSEDEL	WDTC1-mus511-xen499	1.38	0.918841	0.464668	-0.122114
sp|P56695|WFS1_MOUSE	gnl|gene1223|XL-9_2-gene1223|rna3561|	236	210	MLERLVSSESKNY	ILERLVSSESKSF	WFS1-mus236-xen210	0.669	9.10526	-0.579922	3.1867
sp|Q6PEV3|WIPF2_MOUSE	gnl|gene48294|XL-9_2-gene48294|rna93822|	235	225	PVKPPPSPVNIRT	QVKPPPSPINTRS	WIPF2-mus235-xen225	3.022	0.538058	1.5955	-0.894167
sp|Q6PEV3|WIPF2_MOUSE	gnl|gene1436|XL-9_2-gene1436|rna4187|	235	229	PVKPPPSPVNIRT	PVKPPPSPINSRS	WIPF2-mus235-xen229	3.022	0.292115	1.5955	-1.77539
sp|Q80W47|WIPI2_MOUSE	gnl|gene10754|XL-9_2-gene10754|rna31257|	395	394	GAYVPSSPTRLGK	KTYPPPSPTRHAY	WIPI2-mus395-xen394	1.1	1.08421	0.137504	0.116645
sp|P83741|WNK1_MOUSE	gnl|gene50971|XL-9_2-gene50971|rna97689|	2024	2285	TEDGSGSPHSPPH	QEDSLGSPVLQHV	WNK1-mus2024-xen2285	2.356	0.950413	1.23634	-0.0733732
sp|P46938|YAP1_MOUSE	gnl|gene45322|XL-9_2-gene45322|rna89646|	104	90	GTAGALTPQHVRA	GSAGALTPQHVRA	YAP1-mus104-xen90	3.845	11.9111	1.94298	3.57424
sp|Q9D6J3|YJU2_MOUSE	gnl|gene46384|XL-9_2-gene46384|rna91117|	211	211	RRLLEDSESEDEA	KRLLEDSDSDEEG	YJU2-mus211-xen211	1.441	1.83772	0.52707	0.877916
sp|Q9D6J3|YJU2_MOUSE	gnl|gene46384|XL-9_2-gene46384|rna91117|	213	213	LLEDSESEDEAPP	LLEDSDSDEEGSQ	YJU2-mus213-xen213	1.441	1.1746	0.52707	0.232173
sp|Q80SU3|ZAR1_MOUSE	gnl|gene7213|XL-9_2-gene7213|rna21042|	161	148	PTKGEGSPASSGT	GRLPKKSPDSQSQ	ZAR1-mus161-xen148	1.434	4.07407	0.520045	2.02647
sp|Q80SU3|ZAR1_MOUSE	gnl|gene7213|XL-9_2-gene7213|rna21042|	350	296	CKDKRLSCDSTFS	CKNKRLSCDNTYS	ZAR1-mus350-xen296	2.034	3.05085	1.02432	1.60921
sp|O88532|ZFR_MOUSE	gnl|gene625|XL-9_2-gene625|rna1829|	1054	1034	RKRRRDSDGVDGF	RKRRRDSDSVDSF	ZFR-mus1054-xen1034	2.059	1.03968	1.04194	0.0561431
sp|O88532|ZFR_MOUSE	gnl|gene41205|XL-9_2-gene41205|rna83546|	1054	1104	RKRRRDSDGVDGF	RKRRRDSDGVDSF	ZFR-mus1054-xen1104	2.059	2.19136	1.04194	1.13183
sp|Q8R1N0|ZN830_MOUSE	gnl|gene10450|XL-9_2-gene10450|rna30366|	342	335	EEENVDSDDEGEL	WQDEIGSDDEEKL	ZN830-mus342-xen335	1.19	0.874214	0.250962	-0.193942
sp|P39447|ZO1_MOUSE	gnl|gene39525|XL-9_2-gene39525|rna81133|	1614	1613	PKAVPVSPSAVEE	PKAIPVSPSALED	ZO1-mus1614-xen1613	2.966	4.07071	1.56852	2.02528
